# Supplementary material for: Resolving the graft ischemia-reperfusion injury during liver transplantation at the single cell resolution
Source: PubMed Central journal article supplement (PMC8187624; doi:10.1038/s41419-021-03878-3), 2021-06-08
Supplement: 41419_2021_3878_MOESM2_ESM.pdf [file 41419_2021_3878_MOESM2_ESM.pdf]

**Table 1. Basal information of sequencing and data processing.**

| <b>Sample</b>                  | <b>PP</b> | <b>EP</b> | <b>PR</b> |
|--------------------------------|-----------|-----------|-----------|
| Library Type                   |           | cDNA      |           |
| Number of read pairs           | 421386589 | 420211932 | 425404590 |
| Mean Reads per Cell            | 32414     | 32323     | 32723     |
| Sequencing Saturation          | 84.20%    | 86.00%    | 91.00%    |
| Cell number (original)         | 7133      | 6719      | 4941      |
| Cell number (doublets removed) | 443       | 415       | 302       |
| Cell number (after QC)         | 5469      | 5120      | 3724      |
| Median UMI (after QC)          | 3796      | 3339      | 3262      |
| Median genes (after QC)        | 1474      | 1383      | 1262      |

**Table 2. List of markers information for each cluster, related to Figure 1.**

|    | p val     | avg logFC   | pct.1 | pct.2 | p val adj | gene       | cluster | cell type    |
|----|-----------|-------------|-------|-------|-----------|------------|---------|--------------|
| 1  | 0         | 2.946714536 | 0.927 | 0.086 | 0         | GNLY       | 1       | GNLY_NK cell |
| 2  | 0         | 2.2896698   | 0.961 | 0.109 | 0         | GZMB       | 1       | GNLY_NK cell |
| 3  | 0         | 2.248770851 | 0.881 | 0.058 | 0         | FGFBP2     | 1       | GNLY_NK cell |
| 4  | 0         | 2.036317689 | 0.998 | 0.387 | 0         | NKG7       | 1       | GNLY_NK cell |
| 5  | 1.87E-258 | 2.018026522 | 0.184 | 0.017 | 4.09E-254 | PTGDS      | 1       | GNLY_NK cell |
| 6  | 0         | 1.997748095 | 0.968 | 0.234 | 0         | PRF1       | 1       | GNLY_NK cell |
| 7  | 0         | 1.90775879  | 0.797 | 0.119 | 0         | SPON2      | 1       | GNLY_NK cell |
| 8  | 0         | 1.87810219  | 0.961 | 0.171 | 0         | KLRD1      | 1       | GNLY_NK cell |
| 9  | 0         | 1.753542083 | 0.928 | 0.221 | 0         | CTSW       | 1       | GNLY_NK cell |
| 10 | 0         | 1.711648376 | 0.83  | 0.084 | 0         | KLRF1      | 1       | GNLY_NK cell |
| 11 | 0         | 1.64636499  | 0.828 | 0.159 | 0         | GZMH       | 1       | GNLY_NK cell |
| 12 | 0         | 1.645136324 | 0.877 | 0.192 | 0         | CD247      | 1       | GNLY_NK cell |
| 13 | 0         | 1.632724003 | 0.985 | 0.333 | 0         | CST7       | 1       | GNLY_NK cell |
| 14 | 0         | 1.539902791 | 0.799 | 0.155 | 0         | TRBC1      | 1       | GNLY_NK cell |
| 15 | 0         | 1.451825527 | 0.572 | 0.069 | 0         | CLIC3      | 1       | GNLY_NK cell |
| 16 | 0         | 1.397824627 | 0.867 | 0.234 | 0         | FCGR3A     | 1       | GNLY_NK cell |
| 17 | 0         | 1.370861244 | 0.724 | 0.181 | 0         | HOPX       | 1       | GNLY_NK cell |
| 18 | 0         | 1.344134679 | 0.766 | 0.285 | 0         | CMC1       | 1       | GNLY_NK cell |
| 19 | 0         | 1.336806044 | 0.614 | 0.101 | 0         | ADGRG1     | 1       | GNLY_NK cell |
| 20 | 0         | 1.336247682 | 0.51  | 0.034 | 0         | SH2D1B     | 1       | GNLY_NK cell |
| 21 | 0         | 1.325040532 | 0.55  | 0.071 | 0         | KLRC3      | 1       | GNLY_NK cell |
| 22 | 0         | 1.314346597 | 0.48  | 0.031 | 0         | KIR3DL1    | 1       | GNLY_NK cell |
| 23 | 0         | 1.246868403 | 0.937 | 0.358 | 0         | CCL5       | 1       | GNLY_NK cell |
| 24 | 0         | 1.205137442 | 0.84  | 0.273 | 0         | CD7        | 1       | GNLY_NK cell |
| 25 | 0         | 1.16151525  | 0.904 | 0.3   | 0         | GZMA       | 1       | GNLY_NK cell |
| 26 | 0         | 1.147926811 | 0.987 | 0.532 | 0         | IFITM1     | 1       | GNLY_NK cell |
| 27 | 0         | 1.109464676 | 0.946 | 0.485 | 0         | CCL4       | 1       | GNLY_NK cell |
| 28 | 0         | 1.078570064 | 0.384 | 0.038 | 0         | CX3CR1     | 1       | GNLY_NK cell |
| 29 | 0         | 1.054676459 | 0.452 | 0.069 | 0         | S1PR5      | 1       | GNLY_NK cell |
| 30 | 0         | 1.022572035 | 0.304 | 0.017 | 0         | KIR2DL1    | 1       | GNLY_NK cell |
| 31 | 0         | 1.014912726 | 0.647 | 0.184 | 0         | GZMM       | 1       | GNLY_NK cell |
| 32 | 0         | 0.99182733  | 0.802 | 0.368 | 0         | IL2RG      | 1       | GNLY_NK cell |
| 33 | 0         | 0.987345894 | 0.406 | 0.082 | 0         | TTC38      | 1       | GNLY_NK cell |
| 34 | 3.20E-292 | 0.981219527 | 0.712 | 0.332 | 6.97E-288 | GNG2       | 1       | GNLY_NK cell |
| 35 | 0         | 0.964294551 | 0.546 | 0.149 | 0         | ZAP70      | 1       | GNLY_NK cell |
| 36 | 0         | 0.962212772 | 0.537 | 0.16  | 0         | C12orf75   | 1       | GNLY_NK cell |
| 37 | 2.92E-265 | 0.9593142   | 0.533 | 0.162 | 6.36E-261 | IFNG       | 1       | GNLY_NK cell |
| 38 | 0         | 0.946288552 | 0.215 | 0.017 | 0         | LAIR2      | 1       | GNLY_NK cell |
| 39 | 0         | 0.934470894 | 0.388 | 0.05  | 0         | FCRL6      | 1       | GNLY_NK cell |
| 40 | 6.04E-156 | 0.930010627 | 0.608 | 0.303 | 1.32E-151 | CCL3       | 1       | GNLY_NK cell |
| 41 | 2.51E-304 | 0.926425002 | 0.523 | 0.152 | 5.47E-300 | PYHIN1     | 1       | GNLY_NK cell |
| 42 | 4.14E-198 | 0.899539635 | 0.731 | 0.354 | 9.03E-194 | CCL4L2     | 1       | GNLY_NK cell |
| 43 | 0         | 0.897192203 | 0.369 | 0.044 | 0         | TRDC       | 1       | GNLY_NK cell |
| 44 | 0         | 0.896990433 | 0.391 | 0.073 | 0         | TXK        | 1       | GNLY_NK cell |
| 45 | 1.50E-233 | 0.895192929 | 0.585 | 0.266 | 3.27E-229 | APMAP      | 1       | GNLY_NK cell |
| 46 | 0         | 0.891915155 | 0.9   | 0.58  | 0         | HCST       | 1       | GNLY_NK cell |
| 47 | 1.61E-204 | 0.874005078 | 0.54  | 0.245 | 3.51E-200 | MBP        | 1       | GNLY_NK cell |
| 48 | 7.33E-240 | 0.87388722  | 0.56  | 0.208 | 1.60E-235 | SYTL3      | 1       | GNLY_NK cell |
| 49 | 0         | 0.861758503 | 0.247 | 0.016 | 0         | KIR2DL3    | 1       | GNLY_NK cell |
| 50 | 0         | 0.85724835  | 0.877 | 0.444 | 0         | PTPRCAP    | 1       | GNLY_NK cell |
| 51 | 0         | 2.228798658 | 0.962 | 0.21  | 0         | KLRB1      | 2       | KLRB1_T cell |
| 52 | 0         | 2.191354319 | 0.974 | 0.122 | 0         | IL7R       | 2       | KLRB1_T cell |
| 53 | 0         | 1.83725759  | 0.308 | 0.035 | 0         | CCL20      | 2       | KLRB1_T cell |
| 54 | 0         | 1.53695444  | 0.755 | 0.235 | 0         | TNF        | 2       | KLRB1_T cell |
| 55 | 0         | 1.520137453 | 0.991 | 0.436 | 0         | CD69       | 2       | KLRB1_T cell |
| 56 | 0         | 1.49186976  | 0.578 | 0.013 | 0         | TRAV1-2    | 2       | KLRB1_T cell |
| 57 | 0         | 1.429001841 | 0.726 | 0.121 | 0         | KLRG1      | 2       | KLRB1_T cell |
| 58 | 0         | 1.324627489 | 0.543 | 0.012 | 0         | SLC4A10    | 2       | KLRB1_T cell |
| 59 | 0         | 1.284735627 | 0.723 | 0.156 | 0         | LTB        | 2       | KLRB1_T cell |
| 60 | 0         | 1.269568865 | 0.31  | 0.009 | 0         | TRBV6-1    | 2       | KLRB1_T cell |
| 61 | 0         | 1.195004943 | 0.827 | 0.146 | 0         | GZMK       | 2       | KLRB1_T cell |
| 62 | 0         | 1.194225151 | 0.983 | 0.381 | 0         | IL32       | 2       | KLRB1_T cell |
| 63 | 0         | 1.19130666  | 0.935 | 0.516 | 0         | DUSP2      | 2       | KLRB1_T cell |
| 64 | 0         | 1.146937518 | 0.677 | 0.128 | 0         | SPOCK2     | 2       | KLRB1_T cell |
| 65 | 1.24E-168 | 1.125994062 | 0.563 | 0.226 | 2.70E-164 | CCL3L3     | 2       | KLRB1_T cell |
| 66 | 0         | 1.106137194 | 0.818 | 0.167 | 0         | CD3D       | 2       | KLRB1_T cell |
| 67 | 0         | 1.102031082 | 0.594 | 0.109 | 0         | NCR3       | 2       | KLRB1_T cell |
| 68 | 0         | 1.05346551  | 0.678 | 0.139 | 0         | CD8A       | 2       | KLRB1_T cell |
| 69 | 0         | 1.046683484 | 0.336 | 0.044 | 0         | KLRC1      | 2       | KLRB1_T cell |
| 70 | 0         | 1.033578537 | 0.495 | 0.071 | 0         | AC092580.4 | 2       | KLRB1_T cell |
| 71 | 0         | 1.032892222 | 0.414 | 0.023 | 0         | CD40LG     | 2       | KLRB1_T cell |

|     |           |             |       |       |           |          |   |              |
|-----|-----------|-------------|-------|-------|-----------|----------|---|--------------|
| 72  | 0         | 1.028675801 | 0.616 | 0.168 | 0         | RORA     | 2 | KLRB1_T cell |
| 73  | 2.04E-179 | 1.026427017 | 0.777 | 0.471 | 4.45E-175 | TNFAIP3  | 2 | KLRB1_T cell |
| 74  | 2.44E-249 | 1.016130574 | 0.921 | 0.5   | 5.32E-245 | CCL4     | 2 | KLRB1_T cell |
| 75  | 0         | 1.010890153 | 0.729 | 0.227 | 0         | PARP8    | 2 | KLRB1_T cell |
| 76  | 6.42E-250 | 0.995316494 | 0.95  | 0.786 | 1.40E-245 | NFKBIA   | 2 | KLRB1_T cell |
| 77  | 3.79E-165 | 0.986371455 | 0.73  | 0.365 | 8.27E-161 | CCL4L2   | 2 | KLRB1_T cell |
| 78  | 0         | 0.984482881 | 0.959 | 0.321 | 0         | CD3E     | 2 | KLRB1_T cell |
| 79  | 0         | 0.980675216 | 0.425 | 0.036 | 0         | CXCR6    | 2 | KLRB1_T cell |
| 80  | 0         | 0.979254566 | 0.648 | 0.159 | 0         | CD96     | 2 | KLRB1_T cell |
| 81  | 0         | 0.976991618 | 0.175 | 0.006 | 0         | TRAV13-2 | 2 | KLRB1_T cell |
| 82  | 2.99E-209 | 0.925196891 | 0.715 | 0.346 | 6.52E-205 | GPR65    | 2 | KLRB1_T cell |
| 83  | 9.91E-289 | 0.912704321 | 0.514 | 0.131 | 2.16E-284 | SATB1    | 2 | KLRB1_T cell |
| 84  | 0         | 0.911905252 | 0.61  | 0.122 | 0         | CD3G     | 2 | KLRB1_T cell |
| 85  | 1.84E-255 | 0.878614464 | 0.957 | 0.633 | 4.02E-251 | CXCR4    | 2 | KLRB1_T cell |
| 86  | 0         | 0.867495965 | 0.44  | 0.053 | 0         | CAMK4    | 2 | KLRB1_T cell |
| 87  | 0         | 0.859545907 | 0.602 | 0.152 | 0         | TC2N     | 2 | KLRB1_T cell |
| 88  | 0         | 0.856287302 | 0.148 | 0.004 | 0         | TRBV6-4  | 2 | KLRB1_T cell |
| 89  | 4.04E-246 | 0.849429143 | 0.494 | 0.14  | 8.81E-242 | AQP3     | 2 | KLRB1_T cell |
| 90  | 0         | 0.83923991  | 0.392 | 0.042 | 0         | TMIGD2   | 2 | KLRB1_T cell |
| 91  | 0         | 0.826568514 | 0.349 | 0.025 | 0         | CCR6     | 2 | KLRB1_T cell |
| 92  | 1.28E-133 | 0.825727486 | 0.681 | 0.411 | 2.79E-129 | BTG2     | 2 | KLRB1_T cell |
| 93  | 3.26E-244 | 0.820604279 | 0.523 | 0.148 | 7.12E-240 | GBP5     | 2 | KLRB1_T cell |
| 94  | 3.63E-242 | 0.790740506 | 0.983 | 0.812 | 7.91E-238 | ZFP36L2  | 2 | KLRB1_T cell |
| 95  | 6.75E-150 | 0.782983596 | 0.73  | 0.441 | 1.47E-145 | NFKBIZ   | 2 | KLRB1_T cell |
| 96  | 0         | 0.776422729 | 0.363 | 0.055 | 0         | GPR171   | 2 | KLRB1_T cell |
| 97  | 6.46E-279 | 0.772707529 | 0.747 | 0.244 | 1.41E-274 | CD2      | 2 | KLRB1_T cell |
| 98  | 1.90E-272 | 0.758693937 | 0.881 | 0.319 | 4.13E-268 | GZMA     | 2 | KLRB1_T cell |
| 99  | 2.11E-51  | 0.756258888 | 0.366 | 0.188 | 4.61E-47  | IFNG     | 2 | KLRB1_T cell |
| 100 | 1.01E-151 | 0.751000787 | 0.741 | 0.424 | 2.20E-147 | TAGAP    | 2 | KLRB1_T cell |
| 101 | 0         | 3.556750337 | 0.996 | 0.44  | 0         | S100A8   | 3 | S100A8_MP    |
| 102 | 0         | 3.248529577 | 0.957 | 0.136 | 0         | S100A12  | 3 | S100A8_MP    |
| 103 | 0         | 3.148871786 | 0.98  | 0.347 | 0         | S100A9   | 3 | S100A8_MP    |
| 104 | 0         | 2.626882239 | 0.987 | 0.235 | 0         | LYZ      | 3 | S100A8_MP    |
| 105 | 0         | 2.589417168 | 0.919 | 0.079 | 0         | VCAN     | 3 | S100A8_MP    |
| 106 | 0         | 2.022821736 | 0.887 | 0.113 | 0         | FCN1     | 3 | S100A8_MP    |
| 107 | 0         | 1.865658139 | 0.997 | 0.725 | 0         | S100A6   | 3 | S100A8_MP    |
| 108 | 0         | 1.857638277 | 0.84  | 0.156 | 0         | MNDA     | 3 | S100A8_MP    |
| 109 | 0         | 1.836078097 | 0.853 | 0.134 | 0         | CSTA     | 3 | S100A8_MP    |
| 110 | 0         | 1.822055658 | 0.738 | 0.157 | 0         | THBS1    | 3 | S100A8_MP    |
| 111 | 0         | 1.728248465 | 0.85  | 0.253 | 0         | GCA      | 3 | S100A8_MP    |
| 112 | 0         | 1.618864344 | 0.808 | 0.277 | 0         | STXBP2   | 3 | S100A8_MP    |
| 113 | 0         | 1.596737967 | 0.672 | 0.087 | 0         | PLBD1    | 3 | S100A8_MP    |
| 114 | 0         | 1.558880861 | 0.497 | 0.059 | 0         | IL1R2    | 3 | S100A8_MP    |
| 115 | 0         | 1.483694582 | 0.929 | 0.455 | 0         | TSPO     | 3 | S100A8_MP    |
| 116 | 0         | 1.451023805 | 0.711 | 0.129 | 0         | FPR1     | 3 | S100A8_MP    |
| 117 | 0         | 1.434592411 | 0.978 | 0.581 | 0         | S100A11  | 3 | S100A8_MP    |
| 118 | 0         | 1.428504987 | 0.977 | 0.28  | 0         | FCER1G   | 3 | S100A8_MP    |
| 119 | 0         | 1.382718193 | 0.318 | 0.018 | 0         | RETN     | 3 | S100A8_MP    |
| 120 | 0         | 1.379654168 | 0.986 | 0.648 | 0         | S100A4   | 3 | S100A8_MP    |
| 121 | 0         | 1.357054865 | 0.747 | 0.225 | 0         | PGD      | 3 | S100A8_MP    |
| 122 | 0         | 1.336265017 | 0.669 | 0.11  | 0         | LILRA5   | 3 | S100A8_MP    |
| 123 | 0         | 1.332188568 | 0.926 | 0.493 | 0         | LGALS1   | 3 | S100A8_MP    |
| 124 | 0         | 1.316291262 | 0.963 | 0.693 | 0         | S100A10  | 3 | S100A8_MP    |
| 125 | 0         | 1.294347858 | 0.729 | 0.196 | 0         | PLAUR    | 3 | S100A8_MP    |
| 126 | 0         | 1.288163622 | 0.64  | 0.134 | 0         | SELL     | 3 | S100A8_MP    |
| 127 | 0         | 1.271775974 | 0.677 | 0.141 | 0         | SLC11A1  | 3 | S100A8_MP    |
| 128 | 0         | 1.265178389 | 0.576 | 0.148 | 0         | CXCL8    | 3 | S100A8_MP    |
| 129 | 0         | 1.257438285 | 0.503 | 0.032 | 0         | MCEMP1   | 3 | S100A8_MP    |
| 130 | 0         | 1.210960868 | 0.888 | 0.483 | 0         | SERPINB1 | 3 | S100A8_MP    |
| 131 | 0         | 1.171805653 | 0.424 | 0.063 | 0         | EREG     | 3 | S100A8_MP    |
| 132 | 0         | 1.155521034 | 0.937 | 0.462 | 0         | COTL1    | 3 | S100A8_MP    |
| 133 | 0         | 1.138676132 | 0.909 | 0.221 | 0         | AIF1     | 3 | S100A8_MP    |
| 134 | 0         | 1.133932416 | 0.58  | 0.105 | 0         | CAPG     | 3 | S100A8_MP    |
| 135 | 0         | 1.133239786 | 0.669 | 0.186 | 0         | IFI30    | 3 | S100A8_MP    |
| 136 | 4.30E-271 | 1.119100799 | 0.829 | 0.412 | 9.38E-267 | NAMPT    | 3 | S100A8_MP    |
| 137 | 0         | 1.118935569 | 0.781 | 0.232 | 0         | C1orf162 | 3 | S100A8_MP    |
| 138 | 0         | 1.115060661 | 0.987 | 0.439 | 0         | TYROBP   | 3 | S100A8_MP    |
| 139 | 0         | 1.109030458 | 0.713 | 0.171 | 0         | C5AR1    | 3 | S100A8_MP    |
| 140 | 0         | 1.108145959 | 0.992 | 0.859 | 0         | SH3BGRL3 | 3 | S100A8_MP    |
| 141 | 0         | 1.09616965  | 0.706 | 0.208 | 0         | SPI1     | 3 | S100A8_MP    |
| 142 | 0         | 1.091881068 | 0.471 | 0.053 | 0         | CDA      | 3 | S100A8_MP    |
| 143 | 0         | 1.091588867 | 0.574 | 0.064 | 0         | MGST1    | 3 | S100A8_MP    |
| 144 | 3.27E-303 | 1.088426723 | 0.553 | 0.146 | 7.14E-299 | ACSL1    | 3 | S100A8_MP    |

|     |           |             |       |       |           |               |   |             |
|-----|-----------|-------------|-------|-------|-----------|---------------|---|-------------|
| 145 | 2.31E-274 | 1.077488858 | 0.759 | 0.374 | 5.05E-270 | TKT           | 3 | S100A8_MP   |
| 146 | 2.55E-277 | 1.077171259 | 0.689 | 0.287 | 5.57E-273 | APLP2         | 3 | S100A8_MP   |
| 147 | 3.37E-306 | 1.06177404  | 0.299 | 0.036 | 7.34E-302 | TNFAIP6       | 3 | S100A8_MP   |
| 148 | 8.34E-280 | 1.060855527 | 0.742 | 0.37  | 1.82E-275 | TALDO1        | 3 | S100A8_MP   |
| 149 | 0         | 1.056413704 | 0.402 | 0.044 | 0         | RP11-1143G9.4 | 3 | S100A8_MP   |
| 150 | 1.79E-306 | 1.04946038  | 0.666 | 0.231 | 3.89E-302 | TYMP          | 3 | S100A8_MP   |
| 151 | 0         | 1.753024554 | 0.815 | 0.151 | 0         | GZMK          | 4 | GZMK_T cell |
| 152 | 0         | 1.487362952 | 0.718 | 0.139 | 0         | CD8A          | 4 | GZMK_T cell |
| 153 | 0         | 1.44870455  | 0.532 | 0.061 | 0         | CD8B          | 4 | GZMK_T cell |
| 154 | 2.65E-291 | 1.406053335 | 0.622 | 0.203 | 5.78E-287 | RGS1          | 4 | GZMK_T cell |
| 155 | 4.24E-268 | 1.401380412 | 0.474 | 0.108 | 9.24E-264 | XCL2          | 4 | GZMK_T cell |
| 156 | 2.83E-178 | 1.179045981 | 0.745 | 0.366 | 6.17E-174 | CCL4L2        | 4 | GZMK_T cell |
| 157 | 8.62E-172 | 1.160846947 | 0.345 | 0.084 | 1.88E-167 | XCL1          | 4 | GZMK_T cell |
| 158 | 0         | 1.147093454 | 0.712 | 0.18  | 0         | CD3D          | 4 | GZMK_T cell |
| 159 | 0         | 1.140939115 | 0.931 | 0.328 | 0         | CD3E          | 4 | GZMK_T cell |
| 160 | 0         | 1.133812905 | 0.973 | 0.375 | 0         | CCL5          | 4 | GZMK_T cell |
| 161 | 5.80E-271 | 1.054415251 | 0.7   | 0.251 | 1.26E-266 | CD2           | 4 | GZMK_T cell |
| 162 | 1.06E-181 | 0.962514384 | 0.327 | 0.076 | 2.31E-177 | CRTAM         | 4 | GZMK_T cell |
| 163 | 2.36E-279 | 0.91885868  | 0.907 | 0.391 | 5.14E-275 | IL32          | 4 | GZMK_T cell |
| 164 | 2.46E-150 | 0.912216522 | 0.636 | 0.312 | 5.36E-146 | CMC1          | 4 | GZMK_T cell |
| 165 | 4.28E-252 | 0.901306156 | 0.509 | 0.134 | 9.34E-248 | CD3G          | 4 | GZMK_T cell |
| 166 | 5.78E-223 | 0.865420489 | 0.968 | 0.814 | 1.26E-218 | ZFP36L2       | 4 | GZMK_T cell |
| 167 | 1.22E-205 | 0.865268031 | 0.925 | 0.503 | 2.66E-201 | CCL4          | 4 | GZMK_T cell |
| 168 | 2.73E-163 | 0.851413954 | 0.438 | 0.147 | 5.96E-159 | SH2D1A        | 4 | GZMK_T cell |
| 169 | 2.62E-121 | 0.841215095 | 0.463 | 0.18  | 5.71E-117 | IFNG          | 4 | GZMK_T cell |
| 170 | 3.78E-202 | 0.837838478 | 0.874 | 0.524 | 8.24E-198 | DUSP2         | 4 | GZMK_T cell |
| 171 | 3.41E-114 | 0.797964714 | 0.35  | 0.126 | 7.44E-110 | CD27          | 4 | GZMK_T cell |
| 172 | 1.80E-211 | 0.79422746  | 0.798 | 0.33  | 3.92E-207 | GZMA          | 4 | GZMK_T cell |
| 173 | 1.44E-87  | 0.791931173 | 0.443 | 0.23  | 3.15E-83  | ITM2A         | 4 | GZMK_T cell |
| 174 | 2.67E-131 | 0.784592684 | 0.76  | 0.577 | 5.82E-127 | SRSF7         | 4 | GZMK_T cell |
| 175 | 3.05E-119 | 0.756368361 | 0.567 | 0.29  | 6.66E-115 | FYN           | 4 | GZMK_T cell |
| 176 | 4.46E-165 | 0.746043499 | 0.905 | 0.64  | 9.72E-161 | CXCR4         | 4 | GZMK_T cell |
| 177 | 6.15E-216 | 0.735076235 | 0.918 | 0.446 | 1.34E-211 | CD69          | 4 | GZMK_T cell |
| 178 | 1.88E-67  | 0.734325129 | 0.516 | 0.345 | 4.09E-63  | PIK3R1        | 4 | GZMK_T cell |
| 179 | 1.64E-107 | 0.727315181 | 0.524 | 0.255 | 3.57E-103 | TRBC2         | 4 | GZMK_T cell |
| 180 | 3.37E-151 | 0.710260143 | 0.278 | 0.064 | 7.34E-147 | THEMIS        | 4 | GZMK_T cell |
| 181 | 0         | 0.709748914 | 0.995 | 0.986 | 0         | RPS27         | 4 | GZMK_T cell |
| 182 | 1.45E-217 | 0.708145324 | 0.198 | 0.021 | 3.16E-213 | PDCD1         | 4 | GZMK_T cell |
| 183 | 1.03E-124 | 0.701416257 | 0.529 | 0.234 | 2.24E-120 | LCK           | 4 | GZMK_T cell |
| 184 | 1.88E-50  | 0.691392731 | 0.35  | 0.197 | 4.11E-46  | TSPYL2        | 4 | GZMK_T cell |
| 185 | 1.49E-155 | 0.688432916 | 0.819 | 0.464 | 3.24E-151 | PTPRCAP       | 4 | GZMK_T cell |
| 186 | 2.24E-76  | 0.687034581 | 0.735 | 0.592 | 4.89E-72  | DNAJB1        | 4 | GZMK_T cell |
| 187 | 1.65E-91  | 0.685069958 | 0.536 | 0.293 | 3.60E-87  | LBH           | 4 | GZMK_T cell |
| 188 | 6.58E-55  | 0.676055855 | 0.439 | 0.283 | 1.44E-50  | TUBA4A        | 4 | GZMK_T cell |
| 189 | 1.46E-162 | 0.669524732 | 0.975 | 0.914 | 3.19E-158 | JUNB          | 4 | GZMK_T cell |
| 190 | 4.30E-164 | 0.668626755 | 0.925 | 0.704 | 9.37E-160 | PTPRC         | 4 | GZMK_T cell |
| 191 | 2.15E-107 | 0.668038871 | 0.418 | 0.171 | 4.69E-103 | TC2N          | 4 | GZMK_T cell |
| 192 | 1.62E-45  | 0.667051034 | 0.441 | 0.312 | 3.54E-41  | KIAA1551      | 4 | GZMK_T cell |
| 193 | 2.04E-91  | 0.662917128 | 0.57  | 0.339 | 4.44E-87  | STK17A        | 4 | GZMK_T cell |
| 194 | 6.02E-215 | 0.657958327 | 0.968 | 0.912 | 1.31E-210 | RPS29         | 4 | GZMK_T cell |
| 195 | 6.04E-107 | 0.651194809 | 0.483 | 0.213 | 1.32E-102 | GZMM          | 4 | GZMK_T cell |
| 196 | 4.51E-92  | 0.650444525 | 0.571 | 0.34  | 9.83E-88  | RARRES3       | 4 | GZMK_T cell |
| 197 | 2.63E-109 | 0.648196415 | 0.27  | 0.078 | 5.75E-105 | INPP4B        | 4 | GZMK_T cell |
| 198 | 3.01E-69  | 0.646290816 | 0.431 | 0.239 | 6.57E-65  | 1-Sep         | 4 | GZMK_T cell |
| 199 | 5.98E-40  | 0.623494097 | 0.289 | 0.166 | 1.31E-35  | SRRT          | 4 | GZMK_T cell |
| 200 | 1.90E-73  | 0.61928477  | 0.255 | 0.092 | 4.14E-69  | TRAC          | 4 | GZMK_T cell |
| 201 | 0         | 3.006177973 | 0.995 | 0.086 | 0         | C1QB          | 5 | C1QB_MP     |
| 202 | 0         | 2.947844656 | 0.993 | 0.084 | 0         | C1QC          | 5 | C1QB_MP     |
| 203 | 0         | 2.870768197 | 0.993 | 0.092 | 0         | C1QA          | 5 | C1QB_MP     |
| 204 | 0         | 2.211068615 | 0.955 | 0.232 | 0         | LIPA          | 5 | C1QB_MP     |
| 205 | 0         | 2.183121462 | 0.902 | 0.154 | 0         | SLC40A1       | 5 | C1QB_MP     |
| 206 | 0         | 2.163503243 | 0.998 | 0.385 | 0         | CST3          | 5 | C1QB_MP     |
| 207 | 0         | 2.078351842 | 0.985 | 0.237 | 0         | CD68          | 5 | C1QB_MP     |
| 208 | 0         | 2.037555305 | 0.885 | 0.048 | 0         | FOLR2         | 5 | C1QB_MP     |
| 209 | 0         | 1.991344996 | 0.955 | 0.121 | 0         | MS4A7         | 5 | C1QB_MP     |
| 210 | 0         | 1.978118609 | 0.932 | 0.115 | 0         | MS4A4A        | 5 | C1QB_MP     |
| 211 | 0         | 1.960133407 | 0.926 | 0.154 | 0         | HMOX1         | 5 | C1QB_MP     |
| 212 | 0         | 1.928451883 | 0.98  | 0.181 | 0         | CD163         | 5 | C1QB_MP     |
| 213 | 0         | 1.915128147 | 0.993 | 0.483 | 0         | HLA-DRB5      | 5 | C1QB_MP     |
| 214 | 0         | 1.880048703 | 0.678 | 0.054 | 0         | MARCO         | 5 | C1QB_MP     |
| 215 | 0         | 1.860042156 | 1     | 0.978 | 0         | FTL           | 5 | C1QB_MP     |
| 216 | 0         | 1.783210596 | 0.974 | 0.379 | 0         | CTSB          | 5 | C1QB_MP     |
| 217 | 0         | 1.762969199 | 0.983 | 0.269 | 0         | MS4A6A        | 5 | C1QB_MP     |

|     |           |             |       |       |           |               |   |              |
|-----|-----------|-------------|-------|-------|-----------|---------------|---|--------------|
| 218 | 0         | 1.720388279 | 0.85  | 0.075 | 0         | VSIG4         | 5 | C1QB_MP      |
| 219 | 0         | 1.648141007 | 0.916 | 0.202 | 0         | CREG1         | 5 | C1QB_MP      |
| 220 | 0         | 1.607684615 | 0.982 | 0.217 | 0         | AIF1          | 5 | C1QB_MP      |
| 221 | 0         | 1.607332646 | 0.992 | 0.473 | 0         | NPC2          | 5 | C1QB_MP      |
| 222 | 0         | 1.591185773 | 0.508 | 0.053 | 0         | APOE          | 5 | C1QB_MP      |
| 223 | 0         | 1.533384234 | 0.969 | 0.579 | 0         | PSAP          | 5 | C1QB_MP      |
| 224 | 0         | 1.518228712 | 0.995 | 0.44  | 0         | HLA-DRA       | 5 | C1QB_MP      |
| 225 | 0         | 1.506613629 | 0.975 | 0.386 | 0         | CTSS          | 5 | C1QB_MP      |
| 226 | 0         | 1.499928154 | 0.979 | 0.527 | 0         | HLA-DPA1      | 5 | C1QB_MP      |
| 227 | 0         | 1.487909692 | 0.833 | 0.085 | 0         | CSF1R         | 5 | C1QB_MP      |
| 228 | 0         | 1.481915284 | 1     | 0.823 | 0         | CD74          | 5 | C1QB_MP      |
| 229 | 0         | 1.462063145 | 0.828 | 0.117 | 0         | IGSF6         | 5 | C1QB_MP      |
| 230 | 0         | 1.437630153 | 0.834 | 0.155 | 0         | CFD           | 5 | C1QB_MP      |
| 231 | 0         | 1.417266014 | 0.684 | 0.033 | 0         | GPNMB         | 5 | C1QB_MP      |
| 232 | 0         | 1.401409268 | 0.942 | 0.327 | 0         | RNASET2       | 5 | C1QB_MP      |
| 233 | 0         | 1.369128355 | 0.795 | 0.126 | 0         | CPM           | 5 | C1QB_MP      |
| 234 | 0         | 1.367189972 | 0.904 | 0.208 | 0         | MAFB          | 5 | C1QB_MP      |
| 235 | 0         | 1.358546037 | 0.939 | 0.319 | 0         | FCGRT         | 5 | C1QB_MP      |
| 236 | 0         | 1.346971438 | 0.975 | 0.495 | 0         | HLA-DPB1      | 5 | C1QB_MP      |
| 237 | 0         | 1.307116576 | 0.777 | 0.122 | 0         | CPVL          | 5 | C1QB_MP      |
| 238 | 0         | 1.263318861 | 0.929 | 0.219 | 0         | LST1          | 5 | C1QB_MP      |
| 239 | 0         | 1.25094162  | 0.754 | 0.107 | 0         | MCOLN1        | 5 | C1QB_MP      |
| 240 | 0         | 1.244671357 | 0.984 | 0.282 | 0         | FCER1G        | 5 | C1QB_MP      |
| 241 | 0         | 1.237204485 | 0.76  | 0.118 | 0         | RBP7          | 5 | C1QB_MP      |
| 242 | 0         | 1.229866511 | 0.822 | 0.133 | 0         | FAM26F        | 5 | C1QB_MP      |
| 243 | 0         | 1.229801125 | 0.923 | 0.407 | 0         | GLUL          | 5 | C1QB_MP      |
| 244 | 0         | 1.22664113  | 0.71  | 0.085 | 0         | APOC1         | 5 | C1QB_MP      |
| 245 | 0         | 1.225554444 | 0.925 | 0.223 | 0         | CD302         | 5 | C1QB_MP      |
| 246 | 0         | 1.217986513 | 0.855 | 0.191 | 0         | FGL2          | 5 | C1QB_MP      |
| 247 | 0         | 1.217283165 | 0.925 | 0.284 | 0         | BLVRB         | 5 | C1QB_MP      |
| 248 | 0         | 1.21583156  | 0.514 | 0.029 | 0         | TMIGD3        | 5 | C1QB_MP      |
| 249 | 0         | 1.215733987 | 0.701 | 0.157 | 0         | PDK4          | 5 | C1QB_MP      |
| 250 | 0         | 1.214180912 | 0.905 | 0.363 | 0         | GRN           | 5 | C1QB_MP      |
| 251 | 0         | 2.332873622 | 0.835 | 0.025 | 0         | MS4A1         | 6 | MS4A1_B cell |
| 252 | 0         | 2.322939003 | 0.908 | 0.074 | 0         | CD79A         | 6 | MS4A1_B cell |
| 253 | 0         | 1.919717129 | 0.809 | 0.247 | 0         | CD83          | 6 | MS4A1_B cell |
| 254 | 0         | 1.71024699  | 0.979 | 0.576 | 0         | CD37          | 6 | MS4A1_B cell |
| 255 | 0         | 1.568192176 | 0.38  | 0.003 | 0         | TCL1A         | 6 | MS4A1_B cell |
| 256 | 0         | 1.550713943 | 0.999 | 0.443 | 0         | HLA-DRA       | 6 | MS4A1_B cell |
| 257 | 0         | 1.545759318 | 0.59  | 0.016 | 0         | BANK1         | 6 | MS4A1_B cell |
| 258 | 0         | 1.538800048 | 0.899 | 0.279 | 0         | HLA-DQA1      | 6 | MS4A1_B cell |
| 259 | 0         | 1.504055472 | 0.524 | 0.007 | 0         | LINC00926     | 6 | MS4A1_B cell |
| 260 | 0         | 1.470337914 | 1     | 0.824 | 0         | CD74          | 6 | MS4A1_B cell |
| 261 | 0         | 1.350684909 | 0.937 | 0.457 | 0         | HLA-DQB1      | 6 | MS4A1_B cell |
| 262 | 0         | 1.332881709 | 0.686 | 0.168 | 0         | LTB           | 6 | MS4A1_B cell |
| 263 | 0         | 1.2693093   | 0.532 | 0.121 | 0         | CD79B         | 6 | MS4A1_B cell |
| 264 | 0         | 1.190276148 | 0.405 | 0.03  | 0         | ADAM28        | 6 | MS4A1_B cell |
| 265 | 3.42E-302 | 1.189012724 | 0.9   | 0.499 | 7.46E-298 | CD52          | 6 | MS4A1_B cell |
| 266 | 4.06E-271 | 1.18346695  | 0.571 | 0.174 | 8.85E-267 | IRF8          | 6 | MS4A1_B cell |
| 267 | 0         | 1.180363923 | 0.3   | 0.01  | 0         | STAG3         | 6 | MS4A1_B cell |
| 268 | 0         | 1.148653415 | 0.344 | 0.011 | 0         | FCER2         | 6 | MS4A1_B cell |
| 269 | 0         | 1.127407037 | 0.401 | 0.016 | 0         | AFF3          | 6 | MS4A1_B cell |
| 270 | 0         | 1.119434334 | 0.361 | 0.002 | 0         | FAM129C       | 6 | MS4A1_B cell |
| 271 | 0         | 1.107777217 | 0.376 | 0.012 | 0         | FCRLA         | 6 | MS4A1_B cell |
| 272 | 1.25E-259 | 1.107239395 | 0.627 | 0.209 | 2.73E-255 | FCMR          | 6 | MS4A1_B cell |
| 273 | 6.36E-271 | 1.068497751 | 0.448 | 0.102 | 1.39E-266 | HVCN1         | 6 | MS4A1_B cell |
| 274 | 0         | 1.059565918 | 0.343 | 0.02  | 0         | BACH2         | 6 | MS4A1_B cell |
| 275 | 0         | 1.05536879  | 0.403 | 0.054 | 0         | RALGPS2       | 6 | MS4A1_B cell |
| 276 | 2.84E-150 | 1.046074687 | 0.69  | 0.415 | 6.19E-146 | EZR           | 6 | MS4A1_B cell |
| 277 | 0         | 1.028821165 | 0.37  | 0.036 | 0         | ARHGAP24      | 6 | MS4A1_B cell |
| 278 | 4.39E-211 | 1.018764885 | 0.428 | 0.109 | 9.57E-207 | LY9           | 6 | MS4A1_B cell |
| 279 | 2.66E-280 | 1.005279609 | 0.952 | 0.682 | 5.79E-276 | LAPTM5        | 6 | MS4A1_B cell |
| 280 | 0         | 0.994677333 | 0.316 | 0.003 | 0         | CXCR5         | 6 | MS4A1_B cell |
| 281 | 0         | 0.980164143 | 0.312 | 0.005 | 0         | RP11-693J15.5 | 6 | MS4A1_B cell |
| 282 | 5.19E-167 | 0.977757095 | 0.531 | 0.204 | 1.13E-162 | BIRC3         | 6 | MS4A1_B cell |
| 283 | 0         | 0.976751743 | 0.99  | 0.924 | 0         | RPS5          | 6 | MS4A1_B cell |
| 284 | 2.19E-272 | 0.96196454  | 0.915 | 0.503 | 4.78E-268 | HLA-DPB1      | 6 | MS4A1_B cell |
| 285 | 7.05E-142 | 0.960350248 | 0.49  | 0.191 | 1.54E-137 | GPR183        | 6 | MS4A1_B cell |
| 286 | 3.38E-146 | 0.950210657 | 0.577 | 0.283 | 7.36E-142 | MEF2C         | 6 | MS4A1_B cell |
| 287 | 4.68E-278 | 0.946630454 | 0.992 | 0.86  | 1.02E-273 | BTG1          | 6 | MS4A1_B cell |
| 288 | 0         | 0.943752194 | 0.329 | 0.022 | 0         | CD19          | 6 | MS4A1_B cell |
| 289 | 0         | 0.941036141 | 0.278 | 0.003 | 0         | AC079767.4    | 6 | MS4A1_B cell |
| 290 | 0         | 0.933222027 | 0.329 | 0.015 | 0         | BLK           | 6 | MS4A1_B cell |

|     |           |             |       |       |           |          |   |              |
|-----|-----------|-------------|-------|-------|-----------|----------|---|--------------|
| 291 | 0         | 0.926272497 | 0.292 | 0.005 | 0         | CD22     | 6 | MS4A1_B cell |
| 292 | 0         | 0.916432554 | 0.998 | 0.983 | 0         | RPS19    | 6 | MS4A1_B cell |
| 293 | 0         | 0.905041406 | 0.996 | 0.977 | 0         | RPL18A   | 6 | MS4A1_B cell |
| 294 | 9.33E-109 | 0.890517047 | 0.78  | 0.621 | 2.04E-104 | HERPUD1  | 6 | MS4A1_B cell |
| 295 | 0         | 0.882539584 | 0.273 | 0.012 | 0         | CCR7     | 6 | MS4A1_B cell |
| 296 | 2.92E-121 | 0.869382284 | 0.709 | 0.475 | 6.36E-117 | CD55     | 6 | MS4A1_B cell |
| 297 | 6.21E-138 | 0.867788556 | 0.519 | 0.227 | 1.35E-133 | NCF1     | 6 | MS4A1_B cell |
| 298 | 0         | 0.864209356 | 0.261 | 0.005 | 0         | FCRL1    | 6 | MS4A1_B cell |
| 299 | 7.71E-227 | 0.863107344 | 0.956 | 0.677 | 1.68E-222 | HLA-DRB1 | 6 | MS4A1_B cell |
| 300 | 0         | 0.856640055 | 0.258 | 0.003 | 0         | VPREB3   | 6 | MS4A1_B cell |
| 301 | 0         | 2.969477079 | 0.982 | 0.048 | 0         | FCN2     | 7 | FCN2_Endo    |
| 302 | 0         | 2.962846266 | 0.989 | 0.07  | 0         | FCN3     | 7 | FCN2_Endo    |
| 303 | 0         | 2.955881941 | 0.998 | 0.074 | 0         | DNASE1L3 | 7 | FCN2_Endo    |
| 304 | 0         | 2.775391757 | 0.967 | 0.047 | 0         | CLEC4G   | 7 | FCN2_Endo    |
| 305 | 0         | 2.701604924 | 0.987 | 0.057 | 0         | CRHBP    | 7 | FCN2_Endo    |
| 306 | 0         | 2.671816857 | 0.999 | 0.095 | 0         | CCL14    | 7 | FCN2_Endo    |
| 307 | 0         | 2.526476422 | 0.981 | 0.239 | 0         | CTSL     | 7 | FCN2_Endo    |
| 308 | 0         | 2.488849198 | 0.902 | 0.03  | 0         | CLEC4M   | 7 | FCN2_Endo    |
| 309 | 0         | 2.421825092 | 0.97  | 0.034 | 0         | OIT3     | 7 | FCN2_Endo    |
| 310 | 0         | 2.379842891 | 0.947 | 0.135 | 0         | FCGR2B   | 7 | FCN2_Endo    |
| 311 | 0         | 2.376264391 | 0.97  | 0.17  | 0         | ACP5     | 7 | FCN2_Endo    |
| 312 | 0         | 2.317665494 | 0.995 | 0.109 | 0         | TFPI     | 7 | FCN2_Endo    |
| 313 | 0         | 2.259690376 | 0.94  | 0.032 | 0         | CLEC1B   | 7 | FCN2_Endo    |
| 314 | 0         | 2.202994782 | 0.957 | 0.053 | 0         | AKAP12   | 7 | FCN2_Endo    |
| 315 | 0         | 2.090190361 | 0.969 | 0.066 | 0         | RAMP3    | 7 | FCN2_Endo    |
| 316 | 0         | 2.087795059 | 0.979 | 0.098 | 0         | IGFBP4   | 7 | FCN2_Endo    |
| 317 | 0         | 2.081478676 | 0.982 | 0.136 | 0         | ENG      | 7 | FCN2_Endo    |
| 318 | 0         | 2.073050686 | 0.948 | 0.065 | 0         | PLPP3    | 7 | FCN2_Endo    |
| 319 | 0         | 2.065638363 | 0.985 | 0.193 | 0         | SEPP1    | 7 | FCN2_Endo    |
| 320 | 0         | 2.058992126 | 0.995 | 0.165 | 0         | APP      | 7 | FCN2_Endo    |
| 321 | 0         | 2.051543208 | 0.975 | 0.07  | 0         | SPARC    | 7 | FCN2_Endo    |
| 322 | 0         | 2.038502056 | 0.975 | 0.181 | 0         | LGMN     | 7 | FCN2_Endo    |
| 323 | 0         | 2.021038493 | 0.978 | 0.061 | 0         | TSPAN7   | 7 | FCN2_Endo    |
| 324 | 0         | 1.946405944 | 0.983 | 0.092 | 0         | TM4SF1   | 7 | FCN2_Endo    |
| 325 | 0         | 1.936654824 | 0.979 | 0.07  | 0         | IL33     | 7 | FCN2_Endo    |
| 326 | 0         | 1.921837395 | 0.768 | 0.032 | 0         | CCL23    | 7 | FCN2_Endo    |
| 327 | 0         | 1.898274866 | 0.955 | 0.075 | 0         | EGFL7    | 7 | FCN2_Endo    |
| 328 | 0         | 1.895384788 | 0.995 | 0.397 | 0         | TIMP1    | 7 | FCN2_Endo    |
| 329 | 0         | 1.893284087 | 0.953 | 0.075 | 0         | SDPR     | 7 | FCN2_Endo    |
| 330 | 0         | 1.89153873  | 0.988 | 0.243 | 0         | IL6ST    | 7 | FCN2_Endo    |
| 331 | 0         | 1.876400543 | 0.92  | 0.055 | 0         | CLDN5    | 7 | FCN2_Endo    |
| 332 | 0         | 1.831851369 | 0.952 | 0.136 | 0         | MRC1     | 7 | FCN2_Endo    |
| 333 | 0         | 1.800812112 | 0.939 | 0.054 | 0         | LIFR     | 7 | FCN2_Endo    |
| 334 | 0         | 1.762709761 | 0.969 | 0.086 | 0         | GNG11    | 7 | FCN2_Endo    |
| 335 | 0         | 1.752512278 | 0.986 | 0.085 | 0         | TIMP3    | 7 | FCN2_Endo    |
| 336 | 0         | 1.747001789 | 0.892 | 0.076 | 0         | LYVE1    | 7 | FCN2_Endo    |
| 337 | 0         | 1.742496691 | 0.924 | 0.065 | 0         | F8       | 7 | FCN2_Endo    |
| 338 | 0         | 1.741856264 | 0.962 | 0.247 | 0         | PRCP     | 7 | FCN2_Endo    |
| 339 | 0         | 1.72176379  | 0.923 | 0.159 | 0         | CD4      | 7 | FCN2_Endo    |
| 340 | 0         | 1.690468757 | 0.849 | 0.022 | 0         | STAB2    | 7 | FCN2_Endo    |
| 341 | 0         | 1.686665962 | 0.911 | 0.151 | 0         | STAB1    | 7 | FCN2_Endo    |
| 342 | 0         | 1.668935882 | 0.94  | 0.056 | 0         | PPFIBP1  | 7 | FCN2_Endo    |
| 343 | 0         | 1.643791988 | 0.947 | 0.066 | 0         | LDB2     | 7 | FCN2_Endo    |
| 344 | 0         | 1.628132897 | 0.911 | 0.062 | 0         | CLEC3B   | 7 | FCN2_Endo    |
| 345 | 0         | 1.623678357 | 0.939 | 0.063 | 0         | TINAGL1  | 7 | FCN2_Endo    |
| 346 | 0         | 1.623288826 | 0.722 | 0.037 | 0         | IGFBP3   | 7 | FCN2_Endo    |
| 347 | 0         | 1.604488649 | 0.922 | 0.042 | 0         | ADGRF5   | 7 | FCN2_Endo    |
| 348 | 0         | 1.588999863 | 0.807 | 0.029 | 0         | TFPI2    | 7 | FCN2_Endo    |
| 349 | 0         | 1.583164332 | 0.929 | 0.052 | 0         | MYCT1    | 7 | FCN2_Endo    |
| 350 | 0         | 1.578201728 | 0.905 | 0.125 | 0         | CD9      | 7 | FCN2_Endo    |
| 351 | 0         | 1.451825698 | 0.88  | 0.139 | 0         | FCN1     | 8 | FCN1_MP      |
| 352 | 0         | 1.423137464 | 0.99  | 0.24  | 0         | AIF1     | 8 | FCN1_MP      |
| 353 | 0         | 1.340870647 | 0.973 | 0.476 | 0         | COTL1    | 8 | FCN1_MP      |
| 354 | 0         | 1.319388149 | 0.994 | 0.302 | 0         | FCER1G   | 8 | FCN1_MP      |
| 355 | 1.81E-304 | 1.288134373 | 1     | 0.974 | 3.94E-300 | FTH1     | 8 | FCN1_MP      |
| 356 | 0         | 1.286426604 | 0.927 | 0.24  | 0         | LST1     | 8 | FCN1_MP      |
| 357 | 0         | 1.274984132 | 0.872 | 0.181 | 0         | C5AR1    | 8 | FCN1_MP      |
| 358 | 3.21E-297 | 1.209086312 | 0.992 | 0.594 | 7.00E-293 | S100A11  | 8 | FCN1_MP      |
| 359 | 4.51E-182 | 1.203017391 | 0.62  | 0.182 | 9.84E-178 | THBS1    | 8 | FCN1_MP      |
| 360 | 0         | 1.188826603 | 0.986 | 0.26  | 0         | LYZ      | 8 | FCN1_MP      |
| 361 | 0         | 1.187362903 | 0.88  | 0.216 | 0         | SPI1     | 8 | FCN1_MP      |
| 362 | 1.51E-306 | 1.167685938 | 0.999 | 0.403 | 3.29E-302 | CST3     | 8 | FCN1_MP      |
| 363 | 0         | 1.164571085 | 0.917 | 0.244 | 0         | C1orf162 | 8 | FCN1_MP      |

|     |           |             |       |       |           |           |   |              |
|-----|-----------|-------------|-------|-------|-----------|-----------|---|--------------|
| 364 | 1.38E-288 | 1.153949928 | 0.969 | 0.404 | 3.01E-284 | CTSS      | 8 | FCN1_MP      |
| 365 | 0         | 1.13535119  | 0.741 | 0.15  | 0         | LINC01272 | 8 | FCN1_MP      |
| 366 | 4.27E-292 | 1.116006082 | 0.994 | 0.457 | 9.32E-288 | TYROBP    | 8 | FCN1_MP      |
| 367 | 3.50E-242 | 1.088416544 | 0.999 | 0.792 | 7.64E-238 | SAT1      | 8 | FCN1_MP      |
| 368 | 0         | 1.079716948 | 0.831 | 0.194 | 0         | IFI30     | 8 | FCN1_MP      |
| 369 | 0         | 1.055574898 | 0.873 | 0.23  | 0         | MAFB      | 8 | FCN1_MP      |
| 370 | 0         | 1.047262331 | 0.746 | 0.142 | 0         | LILRB2    | 8 | FCN1_MP      |
| 371 | 3.12E-234 | 1.041729517 | 0.972 | 0.591 | 6.81E-230 | PSAP      | 8 | FCN1_MP      |
| 372 | 5.73E-237 | 1.020190822 | 0.992 | 0.456 | 1.25E-232 | HLA-DRA   | 8 | FCN1_MP      |
| 373 | 2.41E-294 | 1.007904142 | 0.542 | 0.09  | 5.26E-290 | IL1B      | 8 | FCN1_MP      |
| 374 | 4.52E-226 | 0.999171997 | 0.989 | 0.734 | 9.86E-222 | S100A6    | 8 | FCN1_MP      |
| 375 | 0         | 0.984181171 | 0.839 | 0.208 | 0         | PLAUR     | 8 | FCN1_MP      |
| 376 | 0         | 0.962968721 | 0.72  | 0.117 | 0         | VCAN      | 8 | FCN1_MP      |
| 377 | 3.44E-231 | 0.953919637 | 1     | 0.979 | 7.50E-227 | FTL       | 8 | FCN1_MP      |
| 378 | 0         | 0.950852031 | 0.913 | 0.208 | 0         | CD163     | 8 | FCN1_MP      |
| 379 | 1.68E-235 | 0.941927431 | 0.846 | 0.283 | 3.67E-231 | BCL2A1    | 8 | FCN1_MP      |
| 380 | 1.00E-185 | 0.937230471 | 0.887 | 0.395 | 2.18E-181 | SOD2      | 8 | FCN1_MP      |
| 381 | 1.30E-222 | 0.931309328 | 0.996 | 0.863 | 2.84E-218 | SH3BGRL3  | 8 | FCN1_MP      |
| 382 | 4.27E-167 | 0.928056964 | 0.885 | 0.423 | 9.31E-163 | NAMPT     | 8 | FCN1_MP      |
| 383 | 0         | 0.92363802  | 0.754 | 0.155 | 0         | SLC11A1   | 8 | FCN1_MP      |
| 384 | 8.30E-166 | 0.921402852 | 0.937 | 0.542 | 1.81E-161 | HLA-DPA1  | 8 | FCN1_MP      |
| 385 | 3.34E-302 | 0.90073252  | 0.782 | 0.177 | 7.29E-298 | CFD       | 8 | FCN1_MP      |
| 386 | 8.26E-230 | 0.89839737  | 0.813 | 0.272 | 1.80E-225 | LGALS3    | 8 | FCN1_MP      |
| 387 | 2.92E-256 | 0.883523874 | 0.748 | 0.186 | 6.36E-252 | HMOX1     | 8 | FCN1_MP      |
| 388 | 1.90E-143 | 0.882060579 | 0.92  | 0.512 | 4.14E-139 | HLA-DPB1  | 8 | FCN1_MP      |
| 389 | 0         | 0.877417256 | 0.944 | 0.262 | 0         | CD68      | 8 | FCN1_MP      |
| 390 | 0         | 0.876017308 | 0.659 | 0.111 | 0         | CLEC4E    | 8 | FCN1_MP      |
| 391 | 0         | 0.871333266 | 0.714 | 0.14  | 0         | CLEC7A    | 8 | FCN1_MP      |
| 392 | 3.18E-288 | 0.865902426 | 0.638 | 0.13  | 6.93E-284 | LILRA5    | 8 | FCN1_MP      |
| 393 | 0         | 0.852245849 | 0.831 | 0.159 | 0         | CSTA      | 8 | FCN1_MP      |
| 394 | 4.44E-210 | 0.84965379  | 0.93  | 0.47  | 9.68E-206 | TSPO      | 8 | FCN1_MP      |
| 395 | 5.53E-171 | 0.849596101 | 0.986 | 0.66  | 1.21E-166 | S100A4    | 8 | FCN1_MP      |
| 396 | 1.62E-283 | 0.847555303 | 0.792 | 0.198 | 3.54E-279 | CYBB      | 8 | FCN1_MP      |
| 397 | 1.55E-167 | 0.842924093 | 0.979 | 0.682 | 3.37E-163 | HLA-DRB1  | 8 | FCN1_MP      |
| 398 | 0         | 0.840462003 | 0.472 | 0.045 | 0         | CD300E    | 8 | FCN1_MP      |
| 399 | 0         | 0.836605274 | 0.663 | 0.132 | 0         | HCK       | 8 | FCN1_MP      |
| 400 | 2.37E-169 | 0.83603938  | 0.914 | 0.503 | 5.17E-165 | HLA-DRB5  | 8 | FCN1_MP      |
| 401 | 0         | 2.057529375 | 0.552 | 0.084 | 0         | XCL1      | 9 | XCL1_NK cell |
| 402 | 0         | 1.860341593 | 0.626 | 0.114 | 0         | XCL2      | 9 | XCL1_NK cell |
| 403 | 7.52E-194 | 1.483898479 | 0.767 | 0.318 | 1.64E-189 | CMC1      | 9 | XCL1_NK cell |
| 404 | 7.12E-263 | 1.331357407 | 0.887 | 0.31  | 1.55E-258 | CD7       | 9 | XCL1_NK cell |
| 405 | 0         | 1.309374266 | 0.939 | 0.226 | 0         | KLRD1     | 9 | XCL1_NK cell |
| 406 | 1.31E-203 | 1.245193474 | 0.547 | 0.131 | 2.85E-199 | IL2RB     | 9 | XCL1_NK cell |
| 407 | 1.14E-271 | 1.178554389 | 0.668 | 0.143 | 2.48E-267 | KLRF1     | 9 | XCL1_NK cell |
| 408 | 5.16E-106 | 1.174387389 | 0.7   | 0.32  | 1.13E-101 | CCL3      | 9 | XCL1_NK cell |
| 409 | 9.28E-135 | 1.138908169 | 0.58  | 0.185 | 2.02E-130 | IFNG      | 9 | XCL1_NK cell |
| 410 | 1.64E-200 | 1.087921563 | 0.931 | 0.398 | 3.57E-196 | CCL5      | 9 | XCL1_NK cell |
| 411 | 1.04E-155 | 1.053426831 | 0.956 | 0.516 | 2.27E-151 | CCL4      | 9 | XCL1_NK cell |
| 412 | 5.09E-186 | 1.040399107 | 0.767 | 0.251 | 1.11E-181 | KLRB1     | 9 | XCL1_NK cell |
| 413 | 2.08E-220 | 1.016539272 | 0.986 | 0.43  | 4.54E-216 | NKG7      | 9 | XCL1_NK cell |
| 414 | 4.81E-192 | 1.005187543 | 0.984 | 0.564 | 1.05E-187 | IFITM1    | 9 | XCL1_NK cell |
| 415 | 1.67E-142 | 0.997497028 | 0.316 | 0.057 | 3.63E-138 | KLRC1     | 9 | XCL1_NK cell |
| 416 | 5.12E-205 | 0.984770468 | 0.398 | 0.065 | 1.12E-200 | TRDC      | 9 | XCL1_NK cell |
| 417 | 3.76E-169 | 0.948937273 | 0.478 | 0.108 | 8.20E-165 | CLIC3     | 9 | XCL1_NK cell |
| 418 | 2.97E-92  | 0.942418374 | 0.643 | 0.345 | 6.48E-88  | PIK3R1    | 9 | XCL1_NK cell |
| 419 | 8.29E-166 | 0.939105283 | 0.325 | 0.053 | 1.81E-161 | TRGV9     | 9 | XCL1_NK cell |
| 420 | 2.81E-196 | 0.927050953 | 0.769 | 0.244 | 6.13E-192 | CD247     | 9 | XCL1_NK cell |
| 421 | 2.60E-185 | 0.92236437  | 0.131 | 0.006 | 5.67E-181 | TRDV2     | 9 | XCL1_NK cell |
| 422 | 4.32E-53  | 0.904923268 | 0.608 | 0.35  | 9.42E-49  | AREG      | 9 | XCL1_NK cell |
| 423 | 4.60E-160 | 0.879167966 | 0.376 | 0.073 | 1.00E-155 | CD160     | 9 | XCL1_NK cell |
| 424 | 2.70E-175 | 0.875305431 | 0.898 | 0.342 | 5.89E-171 | GZMA      | 9 | XCL1_NK cell |
| 425 | 9.03E-131 | 0.85741224  | 0.432 | 0.109 | 1.97E-126 | KLRC3     | 9 | XCL1_NK cell |
| 426 | 1.17E-166 | 0.854530843 | 0.682 | 0.204 | 2.55E-162 | TRBC1     | 9 | XCL1_NK cell |
| 427 | 7.01E-127 | 0.8520594   | 0.904 | 0.535 | 1.53E-122 | DUSP2     | 9 | XCL1_NK cell |
| 428 | 1.25E-148 | 0.846277401 | 0.948 | 0.461 | 2.72E-144 | CD69      | 9 | XCL1_NK cell |
| 429 | 3.53E-167 | 0.820095883 | 0.796 | 0.276 | 7.69E-163 | CTSW      | 9 | XCL1_NK cell |
| 430 | 6.31E-78  | 0.814140319 | 0.725 | 0.38  | 1.38E-73  | CCL4L2    | 9 | XCL1_NK cell |
| 431 | 4.88E-146 | 0.790004352 | 0.414 | 0.094 | 1.06E-141 | TXK       | 9 | XCL1_NK cell |
| 432 | 1.67E-113 | 0.784769391 | 0.61  | 0.23  | 3.63E-109 | SYTL3     | 9 | XCL1_NK cell |
| 433 | 1.00E-128 | 0.783766408 | 0.619 | 0.217 | 2.18E-124 | GZMM      | 9 | XCL1_NK cell |
| 434 | 5.67E-163 | 0.76501494  | 0.929 | 0.38  | 1.24E-158 | CST7      | 9 | XCL1_NK cell |
| 435 | 6.98E-116 | 0.763897414 | 0.459 | 0.137 | 1.52E-111 | MATK      | 9 | XCL1_NK cell |
| 436 | 3.11E-163 | 0.761056989 | 0.825 | 0.291 | 6.79E-159 | PRF1      | 9 | XCL1_NK cell |

|     |           |             |       |       |           |          |    |              |
|-----|-----------|-------------|-------|-------|-----------|----------|----|--------------|
| 437 | 1.91E-119 | 0.750086573 | 0.822 | 0.354 | 4.17E-115 | CD3E     | 9  | XCL1_NK cell |
| 438 | 5.90E-104 | 0.738987444 | 0.668 | 0.295 | 1.29E-99  | FYN      | 9  | XCL1_NK cell |
| 439 | 1.62E-84  | 0.737850496 | 0.649 | 0.343 | 3.53E-80  | STK17A   | 9  | XCL1_NK cell |
| 440 | 9.79E-106 | 0.73549946  | 0.53  | 0.185 | 2.13E-101 | CD96     | 9  | XCL1_NK cell |
| 441 | 1.37E-124 | 0.734893405 | 0.926 | 0.601 | 2.99E-120 | HCST     | 9  | XCL1_NK cell |
| 442 | 2.50E-84  | 0.729882427 | 0.588 | 0.288 | 5.45E-80  | APMAP    | 9  | XCL1_NK cell |
| 443 | 1.28E-99  | 0.716446036 | 0.55  | 0.187 | 2.79E-95  | GZMK     | 9  | XCL1_NK cell |
| 444 | 2.13E-93  | 0.713335814 | 0.498 | 0.178 | 4.65E-89  | PYHIN1   | 9  | XCL1_NK cell |
| 445 | 3.97E-56  | 0.693261536 | 0.769 | 0.575 | 8.65E-52  | NR4A2    | 9  | XCL1_NK cell |
| 446 | 1.05E-68  | 0.688809896 | 0.489 | 0.217 | 2.29E-64  | DENND2D  | 9  | XCL1_NK cell |
| 447 | 3.88E-111 | 0.676794843 | 0.888 | 0.474 | 8.45E-107 | PTPRCAP  | 9  | XCL1_NK cell |
| 448 | 1.15E-106 | 0.676021024 | 0.976 | 0.819 | 2.50E-102 | ZFP36L2  | 9  | XCL1_NK cell |
| 449 | 7.99E-61  | 0.658675486 | 0.561 | 0.285 | 1.74E-56  | PTGER4   | 9  | XCL1_NK cell |
| 450 | 1.75E-86  | 0.654226005 | 0.564 | 0.226 | 3.82E-82  | HOPX     | 9  | XCL1_NK cell |
| 451 | 0         | 1.674727273 | 0.829 | 0.166 | 0         | IL7R     | 10 | IL7R_T cell  |
| 452 | 1.41E-105 | 0.967532843 | 0.537 | 0.189 | 3.07E-101 | LTB      | 10 | IL7R_T cell  |
| 453 | 3.05E-144 | 0.79577016  | 0.656 | 0.202 | 6.65E-140 | CD3D     | 10 | IL7R_T cell  |
| 454 | 0         | 0.787011652 | 0.227 | 0.01  | 0         | LEF1     | 10 | IL7R_T cell  |
| 455 | 3.73E-63  | 0.753048198 | 0.68  | 0.504 | 8.13E-59  | LDHB     | 10 | IL7R_T cell  |
| 456 | 2.34E-48  | 0.746099373 | 0.436 | 0.215 | 5.11E-44  | RGCC     | 10 | IL7R_T cell  |
| 457 | 5.46E-141 | 0.719804454 | 0.362 | 0.073 | 1.19E-136 | CAMK4    | 10 | IL7R_T cell  |
| 458 | 3.81E-96  | 0.713403647 | 0.907 | 0.804 | 8.32E-92  | SARAF    | 10 | IL7R_T cell  |
| 459 | 2.45E-124 | 0.703300992 | 0.269 | 0.046 | 5.34E-120 | CD40LG   | 10 | IL7R_T cell  |
| 460 | 6.51E-105 | 0.690566095 | 0.341 | 0.082 | 1.42E-100 | INPP4B   | 10 | IL7R_T cell  |
| 461 | 4.63E-86  | 0.689627847 | 0.463 | 0.162 | 1.01E-81  | SPOCK2   | 10 | IL7R_T cell  |
| 462 | 2.19E-79  | 0.689282905 | 0.622 | 0.271 | 4.78E-75  | CD2      | 10 | IL7R_T cell  |
| 463 | 3.42E-74  | 0.679571886 | 0.94  | 0.821 | 7.46E-70  | ZFP36L2  | 10 | IL7R_T cell  |
| 464 | 4.38E-114 | 0.678535609 | 0.843 | 0.354 | 9.54E-110 | CD3E     | 10 | IL7R_T cell  |
| 465 | 1.92E-90  | 0.663348241 | 0.387 | 0.114 | 4.18E-86  | ITK      | 10 | IL7R_T cell  |
| 466 | 3.45E-114 | 0.647259657 | 0.318 | 0.067 | 7.52E-110 | TRAT1    | 10 | IL7R_T cell  |
| 467 | 4.56E-84  | 0.646934186 | 0.834 | 0.414 | 9.95E-80  | IL32     | 10 | IL7R_T cell  |
| 468 | 7.55E-45  | 0.629456698 | 0.584 | 0.391 | 1.65E-40  | LEPROTL1 | 10 | IL7R_T cell  |
| 469 | 1.27E-127 | 0.629073426 | 0.232 | 0.034 | 2.78E-123 | ICOS     | 10 | IL7R_T cell  |
| 470 | 2.30E-164 | 0.627467246 | 0.997 | 0.991 | 5.01E-160 | RPS12    | 10 | IL7R_T cell  |
| 471 | 5.43E-25  | 0.604714847 | 0.354 | 0.203 | 1.18E-20  | BATF     | 10 | IL7R_T cell  |
| 472 | 1.30E-79  | 0.594348515 | 0.354 | 0.106 | 2.83E-75  | CD6      | 10 | IL7R_T cell  |
| 473 | 4.45E-52  | 0.591357212 | 0.755 | 0.517 | 9.70E-48  | CD52     | 10 | IL7R_T cell  |
| 474 | 1.26E-51  | 0.591100112 | 0.842 | 0.668 | 2.76E-47  | TXNIP    | 10 | IL7R_T cell  |
| 475 | 1.46E-68  | 0.590651954 | 0.423 | 0.152 | 3.17E-64  | CD3G     | 10 | IL7R_T cell  |
| 476 | 2.90E-100 | 0.586596973 | 0.959 | 0.915 | 6.31E-96  | RPS29    | 10 | IL7R_T cell  |
| 477 | 4.71E-33  | 0.584977327 | 0.352 | 0.179 | 1.03E-28  | AIM1     | 10 | IL7R_T cell  |
| 478 | 2.04E-55  | 0.576241796 | 0.431 | 0.179 | 4.44E-51  | TC2N     | 10 | IL7R_T cell  |
| 479 | 2.25E-99  | 0.575489251 | 0.954 | 0.905 | 4.91E-95  | RPSA     | 10 | IL7R_T cell  |
| 480 | 1.65E-122 | 0.571712645 | 0.987 | 0.987 | 3.59E-118 | RPS27    | 10 | IL7R_T cell  |
| 481 | 1.36E-32  | 0.559849592 | 0.408 | 0.229 | 2.96E-28  | ARHGAP15 | 10 | IL7R_T cell  |
| 482 | 8.14E-101 | 0.558827911 | 0.194 | 0.03  | 1.77E-96  | TCF7     | 10 | IL7R_T cell  |
| 483 | 1.37E-87  | 0.554614494 | 0.886 | 0.465 | 2.99E-83  | CD69     | 10 | IL7R_T cell  |
| 484 | 7.23E-140 | 0.546237212 | 0.98  | 0.977 | 1.58E-135 | RPS3     | 10 | IL7R_T cell  |
| 485 | 6.01E-153 | 0.543519218 | 0.992 | 0.988 | 1.31E-148 | RPL30    | 10 | IL7R_T cell  |
| 486 | 9.23E-40  | 0.54128053  | 0.486 | 0.26  | 2.01E-35  | PARP8    | 10 | IL7R_T cell  |
| 487 | 3.64E-93  | 0.5292825   | 0.946 | 0.916 | 7.95E-89  | RPL10A   | 10 | IL7R_T cell  |
| 488 | 2.37E-143 | 0.523529902 | 0.989 | 0.989 | 5.16E-139 | RPS27A   | 10 | IL7R_T cell  |
| 489 | 3.10E-132 | 0.518653196 | 0.985 | 0.988 | 6.76E-128 | RPL34    | 10 | IL7R_T cell  |
| 490 | 1.97E-128 | 0.518512816 | 0.977 | 0.974 | 4.30E-124 | RPS21    | 10 | IL7R_T cell  |
| 491 | 2.94E-73  | 0.515064753 | 0.917 | 0.856 | 6.40E-69  | EEF1B2   | 10 | IL7R_T cell  |
| 492 | 3.26E-90  | 0.515058489 | 0.971 | 0.952 | 7.11E-86  | RPLP0    | 10 | IL7R_T cell  |
| 493 | 2.16E-62  | 0.507805256 | 0.144 | 0.025 | 4.72E-58  | CCR7     | 10 | IL7R_T cell  |
| 494 | 1.43E-131 | 0.505888267 | 0.998 | 0.99  | 3.11E-127 | RPL13    | 10 | IL7R_T cell  |
| 495 | 3.05E-109 | 0.502757747 | 0.977 | 0.969 | 6.65E-105 | RPS25    | 10 | IL7R_T cell  |
| 496 | 6.96E-105 | 0.492830034 | 0.979 | 0.972 | 1.52E-100 | RPS18    | 10 | IL7R_T cell  |
| 497 | 9.11E-121 | 0.491961563 | 0.98  | 0.988 | 1.99E-116 | RPL32    | 10 | IL7R_T cell  |
| 498 | 3.38E-15  | 0.488896855 | 0.364 | 0.264 | 7.36E-11  | UGP2     | 10 | IL7R_T cell  |
| 499 | 9.09E-37  | 0.487987801 | 0.356 | 0.16  | 1.98E-32  | SCML4    | 10 | IL7R_T cell  |
| 500 | 3.88E-29  | 0.486489608 | 0.284 | 0.137 | 8.45E-25  | PBXIP1   | 10 | IL7R_T cell  |
| 501 | 0         | 3.223552399 | 0.881 | 0.027 | 0         | MGP      | 11 | MGP_Endo     |
| 502 | 0         | 2.648376377 | 0.968 | 0.109 | 0         | TM4SF1   | 11 | MGP_Endo     |
| 503 | 0         | 2.392162271 | 0.888 | 0.095 | 0         | PLPP1    | 11 | MGP_Endo     |
| 504 | 0         | 2.35970956  | 0.779 | 0.022 | 0         | SPARCL1  | 11 | MGP_Endo     |
| 505 | 0         | 2.281764846 | 0.946 | 0.193 | 0         | ID1      | 11 | MGP_Endo     |
| 506 | 0         | 2.241425068 | 0.896 | 0.105 | 0         | TIMP3    | 11 | MGP_Endo     |
| 507 | 0         | 2.104217254 | 0.667 | 0.061 | 0         | SLC9A3R2 | 11 | MGP_Endo     |
| 508 | 0         | 2.097899352 | 0.921 | 0.139 | 0         | CD9      | 11 | MGP_Endo     |
| 509 | 0         | 2.08018493  | 0.833 | 0.059 | 0         | RAMP2    | 11 | MGP_Endo     |



|     |           |             |       |       |           |           |    |                       |
|-----|-----------|-------------|-------|-------|-----------|-----------|----|-----------------------|
| 510 | 0         | 2.066620314 | 0.674 | 0.028 | 0         | PLVAP     | 11 | MGP_Endo              |
| 511 | 0         | 2.029107539 | 0.779 | 0.18  | 0         | GSN       | 11 | MGP_Endo              |
| 512 | 0         | 2.009050557 | 0.848 | 0.096 | 0         | IFI27     | 11 | MGP_Endo              |
| 513 | 0         | 2.006386122 | 0.921 | 0.101 | 0         | CALCRL    | 11 | MGP_Endo              |
| 514 | 0         | 1.996965286 | 0.888 | 0.078 | 0         | CLEC3B    | 11 | MGP_Endo              |
| 515 | 0         | 1.99004288  | 0.873 | 0.081 | 0         | CRIP2     | 11 | MGP_Endo              |
| 516 | 0         | 1.987829711 | 0.948 | 0.145 | 0         | RNASE1    | 11 | MGP_Endo              |
| 517 | 0         | 1.952273007 | 0.896 | 0.084 | 0         | HSPG2     | 11 | MGP_Endo              |
| 518 | 0         | 1.949816584 | 0.729 | 0.074 | 0         | EMP1      | 11 | MGP_Endo              |
| 519 | 0         | 1.945205884 | 0.824 | 0.058 | 0         | CLEC14A   | 11 | MGP_Endo              |
| 520 | 0         | 1.905399004 | 0.846 | 0.103 | 0         | EPAS1     | 11 | MGP_Endo              |
| 521 | 0         | 1.885649238 | 0.86  | 0.237 | 0         | ID3       | 11 | MGP_Endo              |
| 522 | 0         | 1.870955167 | 0.637 | 0.02  | 0         | VWF       | 11 | MGP_Endo              |
| 523 | 0         | 1.870583049 | 0.806 | 0.084 | 0         | CAV1      | 11 | MGP_Endo              |
| 524 | 0         | 1.865537242 | 0.672 | 0.018 | 0         | AQP1      | 11 | MGP_Endo              |
| 525 | 0         | 1.862793001 | 0.774 | 0.034 | 0         | ADIRF     | 11 | MGP_Endo              |
| 526 | 0         | 1.856026052 | 0.724 | 0.066 | 0         | ADAMTS1   | 11 | MGP_Endo              |
| 527 | 0         | 1.855318563 | 0.992 | 0.454 | 0         | IFITM3    | 11 | MGP_Endo              |
| 528 | 0         | 1.844517195 | 0.676 | 0.047 | 0         | GJA4      | 11 | MGP_Endo              |
| 529 | 0         | 1.837998581 | 0.819 | 0.121 | 0         | A2M       | 11 | MGP_Endo              |
| 530 | 0         | 1.830952783 | 0.873 | 0.233 | 0         | PECAM1    | 11 | MGP_Endo              |
| 531 | 0         | 1.762823779 | 0.86  | 0.095 | 0         | EGFL7     | 11 | MGP_Endo              |
| 532 | 0         | 1.728484704 | 0.594 | 0.072 | 0         | C7        | 11 | MGP_Endo              |
| 533 | 0         | 1.711892764 | 0.783 | 0.052 | 0         | EMCN      | 11 | MGP_Endo              |
| 534 | 0         | 1.708495151 | 0.88  | 0.212 | 0         | IGFBP7    | 11 | MGP_Endo              |
| 535 | 0         | 1.692198354 | 0.697 | 0.081 | 0         | CLDN5     | 11 | MGP_Endo              |
| 536 | 0         | 1.675811661 | 0.759 | 0.096 | 0         | IL33      | 11 | MGP_Endo              |
| 537 | 0         | 1.670164793 | 0.92  | 0.104 | 0         | GNG11     | 11 | MGP_Endo              |
| 538 | 0         | 1.58668753  | 0.773 | 0.089 | 0         | LDB2      | 11 | MGP_Endo              |
| 539 | 5.32E-266 | 1.583882387 | 0.948 | 0.401 | 1.16E-261 | HSPB1     | 11 | MGP_Endo              |
| 540 | 0         | 1.57394587  | 0.836 | 0.12  | 0         | IGFBP4    | 11 | MGP_Endo              |
| 541 | 0         | 1.573028963 | 0.766 | 0.089 | 0         | TGM2      | 11 | MGP_Endo              |
| 542 | 3.34E-147 | 1.558466132 | 0.903 | 0.412 | 7.29E-143 | TIMP1     | 11 | MGP_Endo              |
| 543 | 0         | 1.553802374 | 0.724 | 0.097 | 0         | SPARC     | 11 | MGP_Endo              |
| 544 | 0         | 1.547536643 | 0.589 | 0.063 | 0         | SRPX      | 11 | MGP_Endo              |
| 545 | 0         | 1.517064541 | 0.721 | 0.091 | 0         | PLPP3     | 11 | MGP_Endo              |
| 546 | 0         | 1.516979079 | 0.696 | 0.089 | 0         | HYAL2     | 11 | MGP_Endo              |
| 547 | 0         | 1.498878009 | 0.212 | 0.006 | 0         | IGF2      | 11 | MGP_Endo              |
| 548 | 0         | 1.491469279 | 0.809 | 0.085 | 0         | TINAGL1   | 11 | MGP_Endo              |
| 549 | 0         | 1.483953832 | 0.431 | 0.033 | 0         | ANGPTL4   | 11 | MGP_Endo              |
| 550 | 2.57E-134 | 1.480513213 | 0.607 | 0.212 | 5.59E-130 | CXCL2     | 11 | MGP_Endo              |
| 551 | 7.76E-74  | 4.556588525 | 0.452 | 0.151 | 1.69E-69  | IGKV1D-16 | 12 | IGKV1D-16_Plasma cell |
| 552 | 8.76E-94  | 4.043320756 | 0.454 | 0.131 | 1.91E-89  | IGKV1-5   | 12 | IGKV1D-16_Plasma cell |
| 553 | 1.28E-127 | 3.935253471 | 0.523 | 0.16  | 2.80E-123 | IGHM      | 12 | IGKV1D-16_Plasma cell |
| 554 | 1.61E-112 | 3.891665782 | 0.512 | 0.155 | 3.51E-108 | IGHV3-23  | 12 | IGKV1D-16_Plasma cell |
| 555 | 3.54E-29  | 3.878962159 | 0.213 | 0.076 | 7.72E-25  | IGKV3-15  | 12 | IGKV1D-16_Plasma cell |
| 556 | 2.47E-28  | 3.869106566 | 0.371 | 0.17  | 5.39E-24  | IGKV3-20  | 12 | IGKV1D-16_Plasma cell |
| 557 | 3.56E-86  | 3.843157856 | 0.429 | 0.128 | 7.76E-82  | IGHV3-74  | 12 | IGKV1D-16_Plasma cell |
| 558 | 1.42E-52  | 3.822010271 | 0.142 | 0.027 | 3.10E-48  | IGHV3-48  | 12 | IGKV1D-16_Plasma cell |
| 559 | 1.82E-15  | 3.800393283 | 0.33  | 0.177 | 3.97E-11  | IGLV2-14  | 12 | IGKV1D-16_Plasma cell |
| 560 | 1.94E-234 | 3.790448057 | 0.491 | 0.078 | 4.24E-230 | IGKV1-12  | 12 | IGKV1D-16_Plasma cell |
| 561 | 4.14E-77  | 3.788228382 | 0.289 | 0.069 | 9.04E-73  | IGHV3-7   | 12 | IGKV1D-16_Plasma cell |
| 562 | 0         | 3.773839301 | 0.621 | 0.084 | 0         | IGHG1     | 12 | IGKV1D-16_Plasma cell |
| 563 | 0         | 3.764719512 | 0.961 | 0.183 | 0         | JCHAIN    | 12 | IGKV1D-16_Plasma cell |
| 564 | 3.09E-39  | 3.69651482  | 0.227 | 0.071 | 6.74E-35  | IGKV3-11  | 12 | IGKV1D-16_Plasma cell |
| 565 | 2.48E-112 | 3.682874613 | 0.287 | 0.052 | 5.41E-108 | IGLV6-57  | 12 | IGKV1D-16_Plasma cell |
| 566 | 1.32E-27  | 3.671998209 | 0.257 | 0.101 | 2.88E-23  | IGLV2-23  | 12 | IGKV1D-16_Plasma cell |
| 567 | 2.07E-81  | 3.656746333 | 0.199 | 0.035 | 4.51E-77  | IGHV3-30  | 12 | IGKV1D-16_Plasma cell |
| 568 | 0         | 3.633754552 | 0.801 | 0.176 | 0         | IGKC      | 12 | IGKV1D-16_Plasma cell |
| 569 | 3.57E-37  | 3.62738133  | 0.191 | 0.057 | 7.78E-33  | IGLV2-8   | 12 | IGKV1D-16_Plasma cell |
| 570 | 7.65E-40  | 3.573884625 | 0.145 | 0.035 | 1.67E-35  | IGKV2D-28 | 12 | IGKV1D-16_Plasma cell |
| 571 | 7.32E-48  | 3.539089521 | 0.14  | 0.029 | 1.60E-43  | IGHV4-39  | 12 | IGKV1D-16_Plasma cell |
| 572 | 1.07E-22  | 3.489586891 | 0.2   | 0.079 | 2.34E-18  | IGLV1-47  | 12 | IGKV1D-16_Plasma cell |
| 573 | 2.08E-39  | 3.479992909 | 0.328 | 0.13  | 4.53E-35  | IGKV2-30  | 12 | IGKV1D-16_Plasma cell |
| 574 | 6.58E-85  | 3.457416719 | 0.22  | 0.041 | 1.44E-80  | IGKV1-16  | 12 | IGKV1D-16_Plasma cell |
| 575 | 2.31E-85  | 3.419925445 | 0.188 | 0.03  | 5.03E-81  | IGKV1-27  | 12 | IGKV1D-16_Plasma cell |
| 576 | 4.63E-72  | 3.392622483 | 0.131 | 0.018 | 1.01E-67  | IGHV4-59  | 12 | IGKV1D-16_Plasma cell |
| 577 | 2.41E-82  | 3.383921281 | 0.594 | 0.23  | 5.26E-78  | IGKV4-1   | 12 | IGKV1D-16_Plasma cell |
| 578 | 2.78E-29  | 3.313596923 | 0.142 | 0.04  | 6.05E-25  | IGLV1-44  | 12 | IGKV1D-16_Plasma cell |
| 579 | 1.27E-82  | 3.279923017 | 0.119 | 0.012 | 2.77E-78  | IGHV3-72  | 12 | IGKV1D-16_Plasma cell |
| 580 | 2.26E-76  | 3.275216705 | 0.135 | 0.018 | 4.92E-72  | IGHV4-61  | 12 | IGKV1D-16_Plasma cell |
| 581 | 4.44E-213 | 3.260320843 | 0.44  | 0.074 | 9.68E-209 | IGHG2     | 12 | IGKV1D-16_Plasma cell |
| 582 | 4.78E-35  | 3.250301165 | 0.284 | 0.109 | 1.04E-30  | IGKV2-24  | 12 | IGKV1D-16_Plasma cell |

|     |           |             |       |       |             |           |    |                       |
|-----|-----------|-------------|-------|-------|-------------|-----------|----|-----------------------|
| 583 | 0         | 3.222113991 | 0.365 | 0.019 | 0           | IGLV3-1   | 12 | IGKV1D-16_Plasma cell |
| 584 | 1.14E-21  | 3.205531959 | 0.232 | 0.096 | 2.48E-17    | IGLV2-11  | 12 | IGKV1D-16_Plasma cell |
| 585 | 3.90E-59  | 3.166370678 | 0.19  | 0.041 | 8.51E-55    | IGHV4-34  | 12 | IGKV1D-16_Plasma cell |
| 586 | 1.41E-87  | 3.15384116  | 0.137 | 0.016 | 3.08E-83    | IGKV3D-20 | 12 | IGKV1D-16_Plasma cell |
| 587 | 6.01E-08  | 3.007969236 | 0.103 | 0.049 | 0.001311617 | IGHV1-18  | 12 | IGKV1D-16_Plasma cell |
| 588 | 4.34E-38  | 2.98633146  | 0.112 | 0.023 | 9.46E-34    | IGHV3-15  | 12 | IGKV1D-16_Plasma cell |
| 589 | 0         | 2.90356363  | 0.511 | 0.054 | 0           | IGHA1     | 12 | IGKV1D-16_Plasma cell |
| 590 | 1.25E-16  | 2.901320498 | 0.115 | 0.04  | 2.73E-12    | IGLV1-40  | 12 | IGKV1D-16_Plasma cell |
| 591 | 0         | 2.75715481  | 0.993 | 0.07  | 0           | MZB1      | 12 | IGKV1D-16_Plasma cell |
| 592 | 5.32E-150 | 2.753215227 | 0.163 | 0.012 | 1.16E-145   | IGKV1-6   | 12 | IGKV1D-16_Plasma cell |
| 593 | 9.49E-46  | 2.678168431 | 0.131 | 0.026 | 2.07E-41    | IGKV2-29  | 12 | IGKV1D-16_Plasma cell |
| 594 | 1.88E-77  | 2.60206159  | 0.105 | 0.01  | 4.10E-73    | IGKV1-17  | 12 | IGKV1D-16_Plasma cell |
| 595 | 8.28E-64  | 2.534888053 | 0.2   | 0.043 | 1.81E-59    | IGHV6-1   | 12 | IGKV1D-16_Plasma cell |
| 596 | 5.21E-76  | 2.445448304 | 0.209 | 0.042 | 1.14E-71    | IGLC2     | 12 | IGKV1D-16_Plasma cell |
| 597 | 3.19E-212 | 2.391137066 | 0.2   | 0.013 | 6.95E-208   | IGHA2     | 12 | IGKV1D-16_Plasma cell |
| 598 | 5.67E-99  | 2.328734551 | 0.199 | 0.03  | 1.24E-94    | IGLC3     | 12 | IGKV1D-16_Plasma cell |
| 599 | 4.07E-117 | 2.303935586 | 0.145 | 0.013 | 8.88E-113   | IGKV2D-30 | 12 | IGKV1D-16_Plasma cell |
| 600 | 1.92E-54  | 2.301222521 | 0.122 | 0.02  | 4.18E-50    | IGHV3-33  | 12 | IGKV1D-16_Plasma cell |
| 601 | 0         | 2.210328864 | 0.809 | 0.111 | 0           | CXCL3     | 13 | CXCL3_MP              |
| 602 | 0         | 1.987451787 | 0.811 | 0.088 | 0           | IL1B      | 13 | CXCL3_MP              |
| 603 | 0         | 1.933404869 | 0.996 | 0.132 | 0           | C1QA      | 13 | CXCL3_MP              |
| 604 | 0         | 1.930272281 | 0.988 | 0.127 | 0           | C1QB      | 13 | CXCL3_MP              |
| 605 | 0         | 1.91858288  | 0.988 | 0.125 | 0           | C1QC      | 13 | CXCL3_MP              |
| 606 | 0         | 1.785804721 | 0.912 | 0.204 | 0           | CXCL2     | 13 | CXCL3_MP              |
| 607 | 0         | 1.706999047 | 0.823 | 0.16  | 0           | CXCL8     | 13 | CXCL3_MP              |
| 608 | 2.73E-246 | 1.596902437 | 0.538 | 0.085 | 5.95E-242   | G0S2      | 13 | CXCL3_MP              |
| 609 | 0         | 1.54100153  | 0.99  | 0.271 | 0           | CD68      | 13 | CXCL3_MP              |
| 610 | 3.00E-247 | 1.527316201 | 0.994 | 0.399 | 6.54E-243   | SOD2      | 13 | CXCL3_MP              |
| 611 | 2.18E-257 | 1.5240794   | 0.996 | 0.506 | 4.75E-253   | HLA-DRB5  | 13 | CXCL3_MP              |
| 612 | 0         | 1.503518717 | 0.945 | 0.159 | 0           | MS4A7     | 13 | CXCL3_MP              |
| 613 | 0         | 1.458525799 | 0.978 | 0.217 | 0           | CD163     | 13 | CXCL3_MP              |
| 614 | 1.34E-204 | 1.453888691 | 0.898 | 0.317 | 2.93E-200   | CCL3      | 13 | CXCL3_MP              |
| 615 | 8.54E-237 | 1.445108396 | 1     | 0.464 | 1.86E-232   | HLA-DRA   | 13 | CXCL3_MP              |
| 616 | 1.27E-224 | 1.44153333  | 1     | 0.979 | 2.77E-220   | FTL       | 13 | CXCL3_MP              |
| 617 | 5.73E-237 | 1.434285571 | 1     | 0.795 | 1.25E-232   | SAT1      | 13 | CXCL3_MP              |
| 618 | 1.68E-252 | 1.432515606 | 1     | 0.413 | 3.66E-248   | CST3      | 13 | CXCL3_MP              |
| 619 | 4.47E-262 | 1.380383926 | 0.992 | 0.405 | 9.75E-258   | CTSB      | 13 | CXCL3_MP              |
| 620 | 0         | 1.368461678 | 0.481 | 0.05  | 0           | IL1RN     | 13 | CXCL3_MP              |
| 621 | 0         | 1.355524372 | 0.927 | 0.152 | 0           | MS4A4A    | 13 | CXCL3_MP              |
| 622 | 8.40E-225 | 1.350096468 | 0.986 | 0.516 | 1.83E-220   | HLA-DPB1  | 13 | CXCL3_MP              |
| 623 | 1.25E-303 | 1.349634192 | 0.951 | 0.265 | 2.72E-299   | LIPA      | 13 | CXCL3_MP              |
| 624 | 0         | 1.336114235 | 0.931 | 0.19  | 0           | C5AR1     | 13 | CXCL3_MP              |
| 625 | 2.67E-216 | 1.294662039 | 0.994 | 0.546 | 5.83E-212   | HLA-DPA1  | 13 | CXCL3_MP              |
| 626 | 2.37E-192 | 1.245326915 | 1     | 0.831 | 5.16E-188   | CD74      | 13 | CXCL3_MP              |
| 627 | 2.32E-298 | 1.242488402 | 0.959 | 0.237 | 5.06E-294   | MAFB      | 13 | CXCL3_MP              |
| 628 | 0         | 1.237219959 | 0.896 | 0.19  | 0           | HMOX1     | 13 | CXCL3_MP              |
| 629 | 0         | 1.235880056 | 0.845 | 0.11  | 0           | VSIG4     | 13 | CXCL3_MP              |
| 630 | 7.32E-209 | 1.221582889 | 0.992 | 0.596 | 1.60E-204   | PSAP      | 13 | CXCL3_MP              |
| 631 | 1.01E-197 | 1.209911723 | 0.998 | 0.686 | 2.21E-193   | HLA-DRB1  | 13 | CXCL3_MP              |
| 632 | 1.35E-256 | 1.20516247  | 0.982 | 0.301 | 2.94E-252   | MS4A6A    | 13 | CXCL3_MP              |
| 633 | 0         | 1.196546825 | 0.815 | 0.088 | 0           | FOLR2     | 13 | CXCL3_MP              |
| 634 | 1.61E-170 | 1.179813831 | 0.762 | 0.24  | 3.51E-166   | CHMP1B    | 13 | CXCL3_MP              |
| 635 | 1.08E-263 | 1.177721783 | 0.882 | 0.22  | 2.35E-259   | FGL2      | 13 | CXCL3_MP              |
| 636 | 5.16E-225 | 1.17706745  | 0.988 | 0.496 | 1.13E-220   | NPC2      | 13 | CXCL3_MP              |
| 637 | 0         | 1.165106823 | 0.862 | 0.117 | 0           | CSF1R     | 13 | CXCL3_MP              |
| 638 | 1.08E-205 | 1.16461073  | 0.839 | 0.257 | 2.35E-201   | NINJ1     | 13 | CXCL3_MP              |
| 639 | 1.62E-228 | 1.145726934 | 0.947 | 0.301 | 3.52E-224   | HLA-DQA1  | 13 | CXCL3_MP              |
| 640 | 0         | 1.13630161  | 0.78  | 0.112 | 0           | ABCA1     | 13 | CXCL3_MP              |
| 641 | 5.09E-269 | 1.135244472 | 0.242 | 0.013 | 1.11E-264   | CXCL10    | 13 | CXCL3_MP              |
| 642 | 0         | 1.127738115 | 0.821 | 0.155 | 0           | CPM       | 13 | CXCL3_MP              |
| 643 | 1.27E-206 | 1.126919456 | 0.978 | 0.428 | 2.76E-202   | GLUL      | 13 | CXCL3_MP              |
| 644 | 0         | 1.123439097 | 0.458 | 0.036 | 0           | MMP19     | 13 | CXCL3_MP              |
| 645 | 5.15E-277 | 1.109903469 | 0.955 | 0.263 | 1.12E-272   | CD83      | 13 | CXCL3_MP              |
| 646 | 5.70E-201 | 1.106731024 | 0.98  | 0.412 | 1.24E-196   | CTSS      | 13 | CXCL3_MP              |
| 647 | 4.41E-255 | 1.098728164 | 0.819 | 0.186 | 9.61E-251   | CFD       | 13 | CXCL3_MP              |
| 648 | 2.31E-169 | 1.096739419 | 0.804 | 0.259 | 5.03E-165   | ICAM1     | 13 | CXCL3_MP              |
| 649 | 8.73E-271 | 1.084756763 | 0.9   | 0.235 | 1.90E-266   | CREG1     | 13 | CXCL3_MP              |
| 650 | 1.75E-221 | 1.081668628 | 0.906 | 0.27  | 3.81E-217   | KLF4      | 13 | CXCL3_MP              |
| 651 | 0         | 2.822801639 | 0.976 | 0.282 | 0           | STMN1     | 14 | STMN1_NK/T cell       |
| 652 | 4.14E-229 | 2.183714334 | 0.841 | 0.284 | 9.02E-225   | HIST1H4C  | 14 | STMN1_NK/T cell       |
| 653 | 0         | 2.167310035 | 0.794 | 0.033 | 0           | UBE2C     | 14 | STMN1_NK/T cell       |
| 654 | 4.92E-300 | 2.0710895   | 0.955 | 0.376 | 1.07E-295   | HMGB2     | 14 | STMN1_NK/T cell       |
| 655 | 8.17E-269 | 2.046790654 | 0.974 | 0.51  | 1.78E-264   | TUBB      | 14 | STMN1_NK/T cell       |

|     |           |             |       |       |           |               |    |                 |
|-----|-----------|-------------|-------|-------|-----------|---------------|----|-----------------|
| 656 | 7.66E-246 | 2.021849365 | 0.966 | 0.584 | 1.67E-241 | TUBA1B        | 14 | STMN1_NK/T cell |
| 657 | 0         | 1.933512698 | 0.751 | 0.031 | 0         | ASPM          | 14 | STMN1_NK/T cell |
| 658 | 0         | 1.912360033 | 0.805 | 0.042 | 0         | MKI67         | 14 | STMN1_NK/T cell |
| 659 | 0         | 1.838662984 | 0.732 | 0.031 | 0         | CENPF         | 14 | STMN1_NK/T cell |
| 660 | 1.42E-266 | 1.833362492 | 0.989 | 0.603 | 3.09E-262 | HMG2          | 14 | STMN1_NK/T cell |
| 661 | 0         | 1.771218043 | 0.73  | 0.034 | 0         | TOP2A         | 14 | STMN1_NK/T cell |
| 662 | 1.02E-179 | 1.76464362  | 0.899 | 0.511 | 2.22E-175 | ARL6IP1       | 14 | STMN1_NK/T cell |
| 663 | 0         | 1.733345497 | 0.775 | 0.049 | 0         | NUSAP1        | 14 | STMN1_NK/T cell |
| 664 | 0         | 1.732758571 | 0.682 | 0.046 | 0         | TYMS          | 14 | STMN1_NK/T cell |
| 665 | 0         | 1.561701211 | 0.8   | 0.123 | 0         | SMC4          | 14 | STMN1_NK/T cell |
| 666 | 0         | 1.482055497 | 0.764 | 0.104 | 0         | PTTG1         | 14 | STMN1_NK/T cell |
| 667 | 0         | 1.461698789 | 0.68  | 0.028 | 0         | TPX2          | 14 | STMN1_NK/T cell |
| 668 | 0         | 1.453334302 | 0.646 | 0.046 | 0         | RRM2          | 14 | STMN1_NK/T cell |
| 669 | 4.20E-202 | 1.385923354 | 0.974 | 0.661 | 9.15E-198 | H2AFZ         | 14 | STMN1_NK/T cell |
| 670 | 1.23E-241 | 1.325806184 | 0.882 | 0.323 | 2.69E-237 | H2AFV         | 14 | STMN1_NK/T cell |
| 671 | 0         | 1.322896922 | 0.715 | 0.081 | 0         | CKS1B         | 14 | STMN1_NK/T cell |
| 672 | 0         | 1.304199325 | 0.659 | 0.037 | 0         | BIRC5         | 14 | STMN1_NK/T cell |
| 673 | 0         | 1.303530801 | 0.532 | 0.032 | 0         | CDC20         | 14 | STMN1_NK/T cell |
| 674 | 1.58E-207 | 1.277315064 | 0.985 | 0.809 | 3.45E-203 | HMGB1         | 14 | STMN1_NK/T cell |
| 675 | 0         | 1.266732366 | 0.62  | 0.047 | 0         | CDK1          | 14 | STMN1_NK/T cell |
| 676 | 0         | 1.201948004 | 0.663 | 0.051 | 0         | MAD2L1        | 14 | STMN1_NK/T cell |
| 677 | 0         | 1.198331274 | 0.552 | 0.027 | 0         | HMMR          | 14 | STMN1_NK/T cell |
| 678 | 0         | 1.191784062 | 0.648 | 0.07  | 0         | KIF20B        | 14 | STMN1_NK/T cell |
| 679 | 1.79E-175 | 1.16570522  | 0.607 | 0.155 | 3.90E-171 | KPNA2         | 14 | STMN1_NK/T cell |
| 680 | 0         | 1.146884982 | 0.588 | 0.041 | 0         | CDKN3         | 14 | STMN1_NK/T cell |
| 681 | 2.94E-183 | 1.142238764 | 0.854 | 0.345 | 6.41E-179 | NUCKS1        | 14 | STMN1_NK/T cell |
| 682 | 2.20E-173 | 1.140585424 | 0.841 | 0.346 | 4.79E-169 | RAD21         | 14 | STMN1_NK/T cell |
| 683 | 0         | 1.133913628 | 0.536 | 0.032 | 0         | CCNB2         | 14 | STMN1_NK/T cell |
| 684 | 0         | 1.111150526 | 0.571 | 0.022 | 0         | CDC48         | 14 | STMN1_NK/T cell |
| 685 | 0         | 1.108673863 | 0.56  | 0.031 | 0         | CCNA2         | 14 | STMN1_NK/T cell |
| 686 | 0         | 1.105813152 | 0.541 | 0.027 | 0         | DLGAP5        | 14 | STMN1_NK/T cell |
| 687 | 0         | 1.077220876 | 0.562 | 0.024 | 0         | GTSE1         | 14 | STMN1_NK/T cell |
| 688 | 5.43E-149 | 1.074293814 | 0.73  | 0.261 | 1.18E-144 | TUBA1C        | 14 | STMN1_NK/T cell |
| 689 | 4.50E-191 | 1.071845976 | 0.8   | 0.253 | 9.81E-187 | NUCB2         | 14 | STMN1_NK/T cell |
| 690 | 0         | 1.070237081 | 0.539 | 0.026 | 0         | CASC5         | 14 | STMN1_NK/T cell |
| 691 | 0         | 1.068729569 | 0.554 | 0.027 | 0         | KIFC1         | 14 | STMN1_NK/T cell |
| 692 | 1.31E-167 | 1.059676413 | 0.798 | 0.289 | 2.85E-163 | CKS2          | 14 | STMN1_NK/T cell |
| 693 | 2.84E-205 | 1.056117462 | 0.727 | 0.191 | 6.19E-201 | TMPO          | 14 | STMN1_NK/T cell |
| 694 | 4.22E-152 | 1.055872401 | 0.899 | 0.493 | 9.21E-148 | ANP32B        | 14 | STMN1_NK/T cell |
| 695 | 0         | 1.049721454 | 0.442 | 0.03  | 0         | CCNB1         | 14 | STMN1_NK/T cell |
| 696 | 0         | 1.049131623 | 0.521 | 0.025 | 0         | TROAP         | 14 | STMN1_NK/T cell |
| 697 | 0         | 1.024677518 | 0.56  | 0.04  | 0         | PRC1          | 14 | STMN1_NK/T cell |
| 698 | 0         | 1.024056897 | 0.545 | 0.028 | 0         | NUF2          | 14 | STMN1_NK/T cell |
| 699 | 5.01E-143 | 1.022333311 | 0.83  | 0.393 | 1.09E-138 | CALM3         | 14 | STMN1_NK/T cell |
| 700 | 0         | 1.664602941 | 0.348 | 0.011 | 0         | TRBV9         | 15 | TRBV9_T cell    |
| 701 | 3.82E-250 | 1.495128638 | 0.873 | 0.214 | 8.33E-246 | GZMH          | 15 | TRBV9_T cell    |
| 702 | 6.75E-249 | 1.405782781 | 0.799 | 0.166 | 1.47E-244 | CD8A          | 15 | TRBV9_T cell    |
| 703 | 0         | 1.346247598 | 0.311 | 0.006 | 0         | TRAV38-2DV8   | 15 | TRBV9_T cell    |
| 704 | 3.19E-189 | 1.253153378 | 0.779 | 0.205 | 6.95E-185 | CD3D          | 15 | TRBV9_T cell    |
| 705 | 2.21E-222 | 1.214336927 | 0.145 | 0.004 | 4.81E-218 | TRBV13        | 15 | TRBV9_T cell    |
| 706 | 5.11E-162 | 1.209028068 | 0.985 | 0.439 | 1.11E-157 | NKG7          | 15 | TRBV9_T cell    |
| 707 | 4.21E-183 | 1.143448472 | 0.779 | 0.185 | 9.18E-179 | GZMB          | 15 | TRBV9_T cell    |
| 708 | 6.05E-184 | 1.130413622 | 0.512 | 0.086 | 1.32E-179 | CD8B          | 15 | TRBV9_T cell    |
| 709 | 2.35E-156 | 1.110330797 | 0.988 | 0.405 | 5.12E-152 | CCL5          | 15 | TRBV9_T cell    |
| 710 | 7.47E-160 | 1.09953814  | 0.627 | 0.15  | 1.63E-155 | CD3G          | 15 | TRBV9_T cell    |
| 711 | 1.70E-180 | 1.018317362 | 0.243 | 0.019 | 3.72E-176 | RP11-291B21.2 | 15 | TRBV9_T cell    |
| 712 | 2.55E-139 | 1.017960733 | 0.917 | 0.359 | 5.56E-135 | CD3E          | 15 | TRBV9_T cell    |
| 713 | 3.51E-135 | 0.999342974 | 0.958 | 0.417 | 7.65E-131 | IL32          | 15 | TRBV9_T cell    |
| 714 | 4.83E-151 | 0.970610531 | 0.833 | 0.241 | 1.05E-146 | KLRD1         | 15 | TRBV9_T cell    |
| 715 | 2.41E-171 | 0.938695009 | 0.287 | 0.029 | 5.25E-167 | TRGV5         | 15 | TRBV9_T cell    |
| 716 | 3.00E-126 | 0.922089592 | 0.939 | 0.389 | 6.55E-122 | CST7          | 15 | TRBV9_T cell    |
| 717 | 6.97E-108 | 0.901670253 | 0.542 | 0.137 | 1.52E-103 | FGFBP2        | 15 | TRBV9_T cell    |
| 718 | 7.71E-113 | 0.877156755 | 0.814 | 0.3   | 1.68E-108 | PRF1          | 15 | TRBV9_T cell    |
| 719 | 1.18E-113 | 0.872817941 | 0.792 | 0.285 | 2.57E-109 | CTSW          | 15 | TRBV9_T cell    |
| 720 | 1.46E-99  | 0.820333878 | 0.963 | 0.571 | 3.18E-95  | IFITM1        | 15 | TRBV9_T cell    |
| 721 | 3.01E-71  | 0.796830277 | 0.637 | 0.265 | 6.57E-67  | TRBC2         | 15 | TRBV9_T cell    |
| 722 | 6.43E-89  | 0.791568098 | 0.713 | 0.274 | 1.40E-84  | CD2           | 15 | TRBV9_T cell    |
| 723 | 2.99E-88  | 0.787430687 | 0.841 | 0.353 | 6.52E-84  | GZMA          | 15 | TRBV9_T cell    |
| 724 | 6.97E-67  | 0.782606812 | 0.586 | 0.237 | 1.52E-62  | SYTL3         | 15 | TRBV9_T cell    |
| 725 | 1.86E-104 | 0.774555496 | 0.287 | 0.045 | 4.06E-100 | TRGV2         | 15 | TRBV9_T cell    |
| 726 | 5.45E-46  | 0.749434638 | 0.752 | 0.52  | 1.19E-41  | CD52          | 15 | TRBV9_T cell    |
| 727 | 2.36E-62  | 0.733842272 | 0.591 | 0.247 | 5.14E-58  | LCK           | 15 | TRBV9_T cell    |
| 728 | 1.25E-72  | 0.700558745 | 0.414 | 0.115 | 2.73E-68  | KLRC3         | 15 | TRBV9_T cell    |

|     |           |             |       |       |           |          |    |                     |
|-----|-----------|-------------|-------|-------|-----------|----------|----|---------------------|
| 729 | 6.70E-62  | 0.70051487  | 0.561 | 0.225 | 1.46E-57  | GZMM     | 15 | TRBV9_T cell        |
| 730 | 9.47E-56  | 0.698721332 | 0.186 | 0.035 | 2.07E-51  | TRGV3    | 15 | TRBV9_T cell        |
| 731 | 2.84E-68  | 0.695030243 | 0.373 | 0.104 | 6.19E-64  | LAG3     | 15 | TRBV9_T cell        |
| 732 | 4.89E-74  | 0.682433511 | 0.882 | 0.481 | 1.07E-69  | PTPRCAP  | 15 | TRBV9_T cell        |
| 733 | 8.19E-52  | 0.682316785 | 0.654 | 0.349 | 1.79E-47  | RARRES3  | 15 | TRBV9_T cell        |
| 734 | 3.76E-67  | 0.663902549 | 0.907 | 0.607 | 8.19E-63  | HCST     | 15 | TRBV9_T cell        |
| 735 | 1.54E-55  | 0.646307533 | 0.743 | 0.406 | 3.35E-51  | IL2RG    | 15 | TRBV9_T cell        |
| 736 | 1.42E-47  | 0.64141087  | 0.35  | 0.119 | 3.10E-43  | ITK      | 15 | TRBV9_T cell        |
| 737 | 5.93E-41  | 0.635840121 | 0.635 | 0.372 | 1.29E-36  | EVL      | 15 | TRBV9_T cell        |
| 738 | 6.77E-38  | 0.626800332 | 0.586 | 0.349 | 1.48E-33  | C9orf142 | 15 | TRBV9_T cell        |
| 739 | 2.40E-58  | 0.615358948 | 0.718 | 0.324 | 5.22E-54  | CD7      | 15 | TRBV9_T cell        |
| 740 | 5.47E-46  | 0.612995839 | 0.385 | 0.141 | 1.19E-41  | SAMD3    | 15 | TRBV9_T cell        |
| 741 | 8.68E-32  | 0.612084744 | 0.569 | 0.331 | 1.89E-27  | CMC1     | 15 | TRBV9_T cell        |
| 742 | 4.07E-36  | 0.60981538  | 0.566 | 0.304 | 8.87E-32  | FYN      | 15 | TRBV9_T cell        |
| 743 | 4.12E-31  | 0.603988564 | 0.38  | 0.179 | 8.99E-27  | LIME1    | 15 | TRBV9_T cell        |
| 744 | 1.92E-37  | 0.600613693 | 0.569 | 0.322 | 4.18E-33  | SLC9A3R1 | 15 | TRBV9_T cell        |
| 745 | 3.76E-35  | 0.597288634 | 0.365 | 0.152 | 8.20E-31  | ADGRG1   | 15 | TRBV9_T cell        |
| 746 | 3.17E-37  | 0.589067056 | 0.431 | 0.194 | 6.92E-33  | C12orf75 | 15 | TRBV9_T cell        |
| 747 | 5.29E-44  | 0.579316872 | 0.326 | 0.11  | 1.15E-39  | CD6      | 15 | TRBV9_T cell        |
| 748 | 2.17E-27  | 0.577351936 | 0.417 | 0.223 | 4.73E-23  | LYAR     | 15 | TRBV9_T cell        |
| 749 | 4.09E-24  | 0.572373648 | 0.387 | 0.204 | 8.91E-20  | BATF     | 15 | TRBV9_T cell        |
| 750 | 0         | 2.520826902 | 0.983 | 0.124 | 0         | CCL14    | 16 | CCL14_Endo          |
| 751 | 0         | 2.414809692 | 0.97  | 0.099 | 0         | FCN3     | 16 | CCL14_Endo          |
| 752 | 0         | 2.390843269 | 0.916 | 0.078 | 0         | CLEC4G   | 16 | CCL14_Endo          |
| 753 | 0         | 2.357609654 | 0.978 | 0.104 | 0         | DNASE1L3 | 16 | CCL14_Endo          |
| 754 | 0         | 2.316933447 | 0.928 | 0.079 | 0         | FCN2     | 16 | CCL14_Endo          |
| 755 | 0         | 2.09211243  | 0.78  | 0.062 | 0         | CLEC4M   | 16 | CCL14_Endo          |
| 756 | 1.63E-297 | 1.999356321 | 0.914 | 0.22  | 3.56E-293 | SEPP1    | 16 | CCL14_Endo          |
| 757 | 4.55E-278 | 1.982300484 | 0.933 | 0.264 | 9.92E-274 | CTSL     | 16 | CCL14_Endo          |
| 758 | 2.74E-254 | 1.978650461 | 0.81  | 0.2   | 5.97E-250 | ACP5     | 16 | CCL14_Endo          |
| 759 | 0         | 1.949368265 | 0.738 | 0.067 | 0         | CLEC1B   | 16 | CCL14_Endo          |
| 760 | 2.59E-164 | 1.857991242 | 0.652 | 0.183 | 5.65E-160 | STAB1    | 16 | CCL14_Endo          |
| 761 | 5.28E-257 | 1.8293461   | 0.765 | 0.166 | 1.15E-252 | FCGR2B   | 16 | CCL14_Endo          |
| 762 | 0         | 1.824572828 | 0.733 | 0.102 | 0         | RAMP3    | 16 | CCL14_Endo          |
| 763 | 0         | 1.813332147 | 0.891 | 0.14  | 0         | TFPI     | 16 | CCL14_Endo          |
| 764 | 0         | 1.787960388 | 0.773 | 0.12  | 0         | GNG11    | 16 | CCL14_Endo          |
| 765 | 0         | 1.78465662  | 0.723 | 0.071 | 0         | OIT3     | 16 | CCL14_Endo          |
| 766 | 0         | 1.746650712 | 0.79  | 0.092 | 0         | CRHBP    | 16 | CCL14_Endo          |
| 767 | 8.48E-259 | 1.687266445 | 0.509 | 0.063 | 1.85E-254 | CCL23    | 16 | CCL14_Endo          |
| 768 | 0         | 1.646811842 | 0.763 | 0.105 | 0         | IL33     | 16 | CCL14_Endo          |
| 769 | 2.05E-209 | 1.601384492 | 0.975 | 0.417 | 4.47E-205 | TIMP1    | 16 | CCL14_Endo          |
| 770 | 2.99E-201 | 1.580752834 | 0.788 | 0.211 | 6.52E-197 | LGMM     | 16 | CCL14_Endo          |
| 771 | 6.10E-221 | 1.580575407 | 0.615 | 0.114 | 1.33E-216 | CNN3     | 16 | CCL14_Endo          |
| 772 | 5.46E-157 | 1.563699459 | 0.677 | 0.208 | 1.19E-152 | MARCKSL1 | 16 | CCL14_Endo          |
| 773 | 6.00E-238 | 1.552707854 | 0.588 | 0.092 | 1.31E-233 | LIFR     | 16 | CCL14_Endo          |
| 774 | 9.35E-250 | 1.534326693 | 0.551 | 0.081 | 2.04E-245 | NUPR1    | 16 | CCL14_Endo          |
| 775 | 1.66E-271 | 1.52903751  | 0.501 | 0.058 | 3.63E-267 | STAB2    | 16 | CCL14_Endo          |
| 776 | 5.61E-137 | 1.521091138 | 0.625 | 0.192 | 1.22E-132 | CD4      | 16 | CCL14_Endo          |
| 777 | 1.44E-226 | 1.512743314 | 0.756 | 0.169 | 3.13E-222 | ENG      | 16 | CCL14_Endo          |
| 778 | 4.94E-147 | 1.473178543 | 0.756 | 0.273 | 1.08E-142 | IL6ST    | 16 | CCL14_Endo          |
| 779 | 1.62E-189 | 1.472009235 | 0.551 | 0.106 | 3.54E-185 | S100A13  | 16 | CCL14_Endo          |
| 780 | 9.36E-208 | 1.44344527  | 0.533 | 0.09  | 2.04E-203 | S100A16  | 16 | CCL14_Endo          |
| 781 | 9.31E-216 | 1.393081482 | 0.622 | 0.113 | 2.03E-211 | IFI27    | 16 | CCL14_Endo          |
| 782 | 2.67E-227 | 1.380197926 | 0.647 | 0.112 | 5.82E-223 | EGFL7    | 16 | CCL14_Endo          |
| 783 | 3.17E-215 | 1.375884807 | 0.605 | 0.11  | 6.92E-211 | NPDC1    | 16 | CCL14_Endo          |
| 784 | 4.48E-179 | 1.355651447 | 0.563 | 0.111 | 9.76E-175 | LYVE1    | 16 | CCL14_Endo          |
| 785 | 2.76E-156 | 1.35181879  | 0.931 | 0.463 | 6.01E-152 | IFITM3   | 16 | CCL14_Endo          |
| 786 | 2.40E-127 | 1.340738878 | 0.738 | 0.276 | 5.22E-123 | CD14     | 16 | CCL14_Endo          |
| 787 | 1.96E-217 | 1.337149584 | 0.412 | 0.049 | 4.27E-213 | RELN     | 16 | CCL14_Endo          |
| 788 | 5.19E-101 | 1.33683514  | 0.637 | 0.258 | 1.13E-96  | MAF      | 16 | CCL14_Endo          |
| 789 | 4.05E-141 | 1.333501056 | 0.617 | 0.171 | 8.84E-137 | MRC1     | 16 | CCL14_Endo          |
| 790 | 2.36E-217 | 1.332932738 | 0.575 | 0.093 | 5.14E-213 | CLDN5    | 16 | CCL14_Endo          |
| 791 | 4.87E-224 | 1.330314415 | 0.701 | 0.134 | 1.06E-219 | IGFBP4   | 16 | CCL14_Endo          |
| 792 | 1.26E-214 | 1.327997675 | 0.625 | 0.113 | 2.74E-210 | SDPR     | 16 | CCL14_Endo          |
| 793 | 2.59E-166 | 1.324367426 | 0.469 | 0.083 | 5.66E-162 | ADGRL4   | 16 | CCL14_Endo          |
| 794 | 2.57E-206 | 1.283965146 | 0.593 | 0.101 | 5.61E-202 | TSPAN7   | 16 | CCL14_Endo          |
| 795 | 6.50E-162 | 1.276416886 | 0.716 | 0.2   | 1.42E-157 | APP      | 16 | CCL14_Endo          |
| 796 | 7.30E-188 | 1.263189154 | 0.437 | 0.065 | 1.59E-183 | EHD3     | 16 | CCL14_Endo          |
| 797 | 7.05E-75  | 1.247801723 | 0.738 | 0.415 | 1.54E-70  | HSPB1    | 16 | CCL14_Endo          |
| 798 | 6.19E-157 | 1.233725304 | 0.486 | 0.093 | 1.35E-152 | MYCT1    | 16 | CCL14_Endo          |
| 799 | 2.97E-117 | 1.232015645 | 0.627 | 0.206 | 6.49E-113 | PDLIM1   | 16 | CCL14_Endo          |
| 800 | 8.80E-64  | 3.07195586  | 0.636 | 0.235 | 1.92E-59  | IGKV4-1  | 17 | IGKV4-1_Plasma cell |
| 801 | 2.73E-26  | 3.001846507 | 0.302 | 0.111 | 5.95E-22  | IGKV2-24 | 17 | IGKV4-1_Plasma cell |

|     |           |             |       |       |             |           |    |                     |
|-----|-----------|-------------|-------|-------|-------------|-----------|----|---------------------|
| 802 | 7.22E-42  | 2.900733859 | 0.148 | 0.025 | 1.57E-37    | IGKV2-28  | 17 | IGKV4-1_Plasma cell |
| 803 | 1.38E-24  | 2.834990195 | 0.334 | 0.133 | 3.01E-20    | IGKV2-30  | 17 | IGKV4-1_Plasma cell |
| 804 | 3.20E-11  | 2.817248443 | 0.183 | 0.082 | 6.97E-07    | IGLV1-47  | 17 | IGKV4-1_Plasma cell |
| 805 | 1.20E-24  | 2.674851493 | 0.328 | 0.136 | 2.61E-20    | IGHV3-74  | 17 | IGKV4-1_Plasma cell |
| 806 | 1.71E-126 | 2.669563644 | 0.325 | 0.043 | 3.74E-122   | IGHV6-1   | 17 | IGKV4-1_Plasma cell |
| 807 | 3.97E-07  | 2.666389526 | 0.192 | 0.099 | 0.008663441 | IGLV2-11  | 17 | IGKV4-1_Plasma cell |
| 808 | 2.62E-17  | 2.572780603 | 0.109 | 0.028 | 5.71E-13    | IGKV2-29  | 17 | IGKV4-1_Plasma cell |
| 809 | 5.82E-172 | 2.539668465 | 0.5   | 0.078 | 1.27E-167   | IGHG2     | 17 | IGKV4-1_Plasma cell |
| 810 | 2.78E-13  | 2.501169963 | 0.13  | 0.045 | 6.07E-09    | IGHV4-34  | 17 | IGKV4-1_Plasma cell |
| 811 | 0         | 2.486238622 | 0.994 | 0.195 | 0           | JCHAIN    | 17 | IGKV4-1_Plasma cell |
| 812 | 2.27E-12  | 2.48556082  | 0.343 | 0.174 | 4.95E-08    | IGKV3-20  | 17 | IGKV4-1_Plasma cell |
| 813 | 1.76E-48  | 2.448805513 | 0.462 | 0.162 | 3.83E-44    | IGHV3-23  | 17 | IGKV4-1_Plasma cell |
| 814 | 0         | 2.414751846 | 0.997 | 0.084 | 0           | MZB1      | 17 | IGKV4-1_Plasma cell |
| 815 | 2.11E-22  | 2.40486664  | 0.109 | 0.024 | 4.61E-18    | IGHV3-15  | 17 | IGKV4-1_Plasma cell |
| 816 | 2.06E-25  | 2.353644966 | 0.142 | 0.033 | 4.49E-21    | IGKV1-27  | 17 | IGKV4-1_Plasma cell |
| 817 | 2.64E-23  | 2.345928615 | 0.142 | 0.037 | 5.76E-19    | IGKV2D-28 | 17 | IGKV4-1_Plasma cell |
| 818 | 1.16E-16  | 2.344917082 | 0.112 | 0.031 | 2.53E-12    | IGHV4-39  | 17 | IGKV4-1_Plasma cell |
| 819 | 3.97E-225 | 2.321073787 | 0.802 | 0.186 | 8.65E-221   | IGKC      | 17 | IGKV4-1_Plasma cell |
| 820 | 1.69E-24  | 2.256112801 | 0.355 | 0.138 | 3.68E-20    | IGKV1-5   | 17 | IGKV4-1_Plasma cell |
| 821 | 4.51E-11  | 2.11485667  | 0.186 | 0.079 | 9.84E-07    | IGKV3-15  | 17 | IGKV4-1_Plasma cell |
| 822 | 1.32E-17  | 2.113826231 | 0.178 | 0.059 | 2.88E-13    | IGLV2-8   | 17 | IGKV4-1_Plasma cell |
| 823 | 1.43E-43  | 2.082566233 | 0.204 | 0.045 | 3.12E-39    | IGLC2     | 17 | IGKV4-1_Plasma cell |
| 824 | 1.42E-258 | 2.011802777 | 0.553 | 0.061 | 3.10E-254   | IGHA1     | 17 | IGKV4-1_Plasma cell |
| 825 | 2.94E-14  | 2.01082674  | 0.192 | 0.075 | 6.42E-10    | IGHV3-7   | 17 | IGKV4-1_Plasma cell |
| 826 | 2.22E-110 | 2.009159058 | 0.462 | 0.086 | 4.84E-106   | IGKV1-12  | 17 | IGKV4-1_Plasma cell |
| 827 | 5.02E-22  | 1.945742307 | 0.145 | 0.039 | 1.10E-17    | IGHV3-30  | 17 | IGKV4-1_Plasma cell |
| 828 | 3.95E-201 | 1.928507689 | 1     | 0.639 | 8.61E-197   | HSP90B1   | 17 | IGKV4-1_Plasma cell |
| 829 | 0         | 1.857491266 | 0.746 | 0.09  | 0           | IGHG1     | 17 | IGKV4-1_Plasma cell |
| 830 | 3.09E-66  | 1.831278544 | 0.142 | 0.015 | 6.75E-62    | IGKV2D-30 | 17 | IGKV4-1_Plasma cell |
| 831 | 1.89E-302 | 1.750987352 | 0.947 | 0.224 | 4.12E-298   | SEC11C    | 17 | IGKV4-1_Plasma cell |
| 832 | 0         | 1.735222579 | 0.876 | 0.051 | 0           | TXNDC5    | 17 | IGKV4-1_Plasma cell |
| 833 | 3.68E-196 | 1.684570401 | 0.997 | 0.728 | 8.02E-192   | PPIB      | 17 | IGKV4-1_Plasma cell |
| 834 | 0         | 1.681306404 | 0.849 | 0.051 | 0           | IGLL5     | 17 | IGKV4-1_Plasma cell |
| 835 | 3.26E-95  | 1.661678953 | 0.109 | 0.006 | 7.11E-91    | IGKV2D-24 | 17 | IGKV4-1_Plasma cell |
| 836 | 0         | 1.65907214  | 0.926 | 0.098 | 0           | ITM2C     | 17 | IGKV4-1_Plasma cell |
| 837 | 3.86E-193 | 1.622621086 | 0.973 | 0.457 | 8.41E-189   | XBP1      | 17 | IGKV4-1_Plasma cell |
| 838 | 0         | 1.60211482  | 0.858 | 0.046 | 0           | RRM2      | 17 | IGKV4-1_Plasma cell |
| 839 | 5.87E-07  | 1.590562653 | 0.284 | 0.16  | 0.012794954 | IGKV1D-16 | 17 | IGKV4-1_Plasma cell |
| 840 | 6.80E-211 | 1.560021697 | 0.938 | 0.372 | 1.48E-206   | MYDGF     | 17 | IGKV4-1_Plasma cell |
| 841 | 1.06E-107 | 1.521861254 | 0.222 | 0.022 | 2.31E-103   | IGHG3     | 17 | IGKV4-1_Plasma cell |
| 842 | 8.30E-232 | 1.515729086 | 0.973 | 0.37  | 1.81E-227   | SSR3      | 17 | IGKV4-1_Plasma cell |
| 843 | 0         | 1.511729128 | 0.899 | 0.052 | 0           | DERL3     | 17 | IGKV4-1_Plasma cell |
| 844 | 4.77E-44  | 1.504157497 | 0.45  | 0.168 | 1.04E-39    | IGHM      | 17 | IGKV4-1_Plasma cell |
| 845 | 0         | 1.502733061 | 0.911 | 0.065 | 0           | POU2AF1   | 17 | IGKV4-1_Plasma cell |
| 846 | 0         | 1.496084075 | 0.891 | 0.039 | 0           | TNFRSF17  | 17 | IGKV4-1_Plasma cell |
| 847 | 7.78E-274 | 2.279740707 | 0.935 | 0.169 | 1.70E-269   | CXCL8     | 18 | CXCL8_MP            |
| 848 | 1.25E-283 | 2.229395239 | 0.844 | 0.122 | 2.72E-279   | CXCL3     | 18 | CXCL8_MP            |
| 849 | 0         | 2.201013819 | 0.844 | 0.099 | 0           | IL1B      | 18 | CXCL8_MP            |
| 850 | 1.11E-206 | 1.900397519 | 0.901 | 0.191 | 2.42E-202   | THBS1     | 18 | CXCL8_MP            |
| 851 | 0         | 1.900064346 | 0.794 | 0.08  | 0           | EREG      | 18 | CXCL8_MP            |
| 852 | 6.72E-236 | 1.86650878  | 0.981 | 0.225 | 1.46E-231   | PLAUR     | 18 | CXCL8_MP            |
| 853 | 7.38E-145 | 1.821994406 | 0.977 | 0.388 | 1.61E-140   | S100A9    | 18 | CXCL8_MP            |
| 854 | 1.21E-196 | 1.818107354 | 0.92  | 0.216 | 2.64E-192   | CXCL2     | 18 | CXCL8_MP            |
| 855 | 4.15E-181 | 1.770825794 | 0.969 | 0.299 | 9.05E-177   | BCL2A1    | 18 | CXCL8_MP            |
| 856 | 7.56E-279 | 1.759445853 | 0.908 | 0.133 | 1.65E-274   | VCAN      | 18 | CXCL8_MP            |
| 857 | 8.22E-187 | 1.709051991 | 1     | 0.283 | 1.79E-182   | LYZ       | 18 | CXCL8_MP            |
| 858 | 4.49E-261 | 1.586513517 | 0.958 | 0.161 | 9.78E-257   | FCN1      | 18 | CXCL8_MP            |
| 859 | 3.74E-150 | 1.536084531 | 0.989 | 0.409 | 8.15E-146   | SOD2      | 18 | CXCL8_MP            |
| 860 | 7.04E-211 | 1.483821595 | 0.664 | 0.09  | 1.54E-206   | G0S2      | 18 | CXCL8_MP            |
| 861 | 0         | 1.459782087 | 0.622 | 0.047 | 0           | TNFAIP6   | 18 | CXCL8_MP            |
| 862 | 6.67E-206 | 1.453285541 | 0.935 | 0.202 | 1.46E-201   | C5AR1     | 18 | CXCL8_MP            |
| 863 | 0         | 1.433745121 | 0.798 | 0.088 | 0           | NLRP3     | 18 | CXCL8_MP            |
| 864 | 7.04E-121 | 1.282428837 | 1     | 0.974 | 1.53E-116   | FTH1      | 18 | CXCL8_MP            |
| 865 | 1.71E-122 | 1.281916424 | 0.989 | 0.476 | 3.73E-118   | S100A8    | 18 | CXCL8_MP            |
| 866 | 1.31E-237 | 1.240618974 | 0.622 | 0.072 | 2.86E-233   | PTGS2     | 18 | CXCL8_MP            |
| 867 | 8.82E-184 | 1.213921101 | 0.866 | 0.18  | 1.92E-179   | CSTA      | 18 | CXCL8_MP            |
| 868 | 5.60E-114 | 1.207196449 | 0.977 | 0.436 | 1.22E-109   | NAMPT     | 18 | CXCL8_MP            |
| 869 | 2.20E-99  | 1.20689918  | 0.363 | 0.053 | 4.79E-95    | CCL20     | 18 | CXCL8_MP            |
| 870 | 2.00E-128 | 1.205271211 | 0.992 | 0.325 | 4.37E-124   | FCER1G    | 18 | CXCL8_MP            |
| 871 | 2.30E-210 | 1.193694551 | 0.767 | 0.127 | 5.03E-206   | CLEC4E    | 18 | CXCL8_MP            |
| 872 | 1.42E-54  | 1.14473903  | 0.752 | 0.355 | 3.10E-50    | AREG      | 18 | CXCL8_MP            |
| 873 | 3.06E-104 | 1.142923325 | 0.996 | 0.742 | 6.68E-100   | S100A6    | 18 | CXCL8_MP            |
| 874 | 1.48E-172 | 1.131767316 | 0.347 | 0.029 | 3.22E-168   | CXCL1     | 18 | CXCL8_MP            |

|     |           |             |       |       |           |          |    |                     |
|-----|-----------|-------------|-------|-------|-----------|----------|----|---------------------|
| 875 | 2.58E-112 | 1.129048606 | 0.973 | 0.492 | 5.63E-108 | COTL1    | 18 | CXCL8_MP            |
| 876 | 5.13E-161 | 1.113297436 | 0.79  | 0.165 | 1.12E-156 | FPR1     | 18 | CXCL8_MP            |
| 877 | 1.70E-103 | 1.098811571 | 0.992 | 0.607 | 3.70E-99  | S100A11  | 18 | CXCL8_MP            |
| 878 | 3.77E-140 | 1.096049905 | 0.821 | 0.201 | 8.22E-136 | MNDA     | 18 | CXCL8_MP            |
| 879 | 1.10E-106 | 1.089865005 | 0.958 | 0.485 | 2.39E-102 | TSPO     | 18 | CXCL8_MP            |
| 880 | 8.66E-131 | 1.085332742 | 0.855 | 0.237 | 1.89E-126 | SPI1     | 18 | CXCL8_MP            |
| 881 | 3.06E-153 | 1.073163827 | 0.79  | 0.173 | 6.66E-149 | SLC11A1  | 18 | CXCL8_MP            |
| 882 | 8.46E-86  | 1.067275014 | 0.882 | 0.397 | 1.85E-81  | IER3     | 18 | CXCL8_MP            |
| 883 | 4.94E-109 | 1.065487883 | 0.989 | 0.422 | 1.08E-104 | CTSS     | 18 | CXCL8_MP            |
| 884 | 2.13E-146 | 1.06100393  | 0.817 | 0.192 | 4.64E-142 | S100A12  | 18 | CXCL8_MP            |
| 885 | 9.84E-102 | 1.056264437 | 0.92  | 0.396 | 2.15E-97  | TKT      | 18 | CXCL8_MP            |
| 886 | 1.43E-230 | 1.054354548 | 0.363 | 0.023 | 3.12E-226 | SERPINB2 | 18 | CXCL8_MP            |
| 887 | 3.99E-130 | 1.050481572 | 0.966 | 0.264 | 8.70E-126 | AIF1     | 18 | CXCL8_MP            |
| 888 | 1.46E-87  | 1.040601963 | 0.817 | 0.311 | 3.19E-83  | STXBP2   | 18 | CXCL8_MP            |
| 889 | 1.09E-224 | 1.022677315 | 0.592 | 0.067 | 2.38E-220 | TREM1    | 18 | CXCL8_MP            |
| 890 | 8.09E-102 | 1.021161618 | 1     | 0.474 | 1.76E-97  | TYROBP   | 18 | CXCL8_MP            |
| 891 | 5.94E-140 | 1.019201265 | 0.76  | 0.169 | 1.30E-135 | ACSL1    | 18 | CXCL8_MP            |
| 892 | 1.27E-99  | 0.995302828 | 0.931 | 0.376 | 2.77E-95  | SAMSN1   | 18 | CXCL8_MP            |
| 893 | 1.09E-226 | 0.994108372 | 0.58  | 0.063 | 2.38E-222 | AQP9     | 18 | CXCL8_MP            |
| 894 | 1.22E-99  | 0.993741576 | 0.836 | 0.292 | 2.65E-95  | GCA      | 18 | CXCL8_MP            |
| 895 | 3.18E-185 | 0.989409388 | 0.5   | 0.057 | 6.93E-181 | IL1RN    | 18 | CXCL8_MP            |
| 896 | 1.22E-155 | 0.984263597 | 0.767 | 0.157 | 2.65E-151 | CLEC7A   | 18 | CXCL8_MP            |
| 897 | 3.58E-222 | 6.873680195 | 1     | 0.352 | 7.81E-218 | HBB      | 19 | HBB_Erthyroid cell  |
| 898 | 0         | 5.8895557   | 1     | 0.093 | 0         | HBA2     | 19 | HBB_Erthyroid cell  |
| 899 | 0         | 5.347421695 | 0.996 | 0.039 | 0         | CA1      | 19 | HBB_Erthyroid cell  |
| 900 | 0         | 4.78532134  | 0.973 | 0.019 | 0         | HBM      | 19 | HBB_Erthyroid cell  |
| 901 | 0         | 4.651736571 | 0.976 | 0.019 | 0         | HBD      | 19 | HBB_Erthyroid cell  |
| 902 | 0         | 4.487890698 | 0.988 | 0.017 | 0         | AHSP     | 19 | HBB_Erthyroid cell  |
| 903 | 0         | 4.482359711 | 0.988 | 0.029 | 0         | HBA1     | 19 | HBB_Erthyroid cell  |
| 904 | 0         | 3.693351535 | 0.992 | 0.052 | 0         | CA2      | 19 | HBB_Erthyroid cell  |
| 905 | 5.46E-229 | 3.082105099 | 0.996 | 0.318 | 1.19E-224 | PRDX2    | 19 | HBB_Erthyroid cell  |
| 906 | 0         | 3.079494765 | 0.969 | 0.002 | 0         | GYPA     | 19 | HBB_Erthyroid cell  |
| 907 | 0         | 2.931983917 | 0.945 | 0.004 | 0         | SLC4A1   | 19 | HBB_Erthyroid cell  |
| 908 | 0         | 2.867375114 | 0.984 | 0.182 | 0         | SLC25A37 | 19 | HBB_Erthyroid cell  |
| 909 | 0         | 2.866597265 | 0.969 | 0.003 | 0         | ALAS2    | 19 | HBB_Erthyroid cell  |
| 910 | 0         | 2.527183104 | 0.925 | 0.004 | 0         | HEMGN    | 19 | HBB_Erthyroid cell  |
| 911 | 0         | 2.422726444 | 0.929 | 0.002 | 0         | GYPB     | 19 | HBB_Erthyroid cell  |
| 912 | 0         | 2.379740579 | 0.851 | 0.108 | 0         | H1FO     | 19 | HBB_Erthyroid cell  |
| 913 | 0         | 2.341872232 | 0.949 | 0.052 | 0         | HMBS     | 19 | HBB_Erthyroid cell  |
| 914 | 2.14E-218 | 2.289513522 | 0.988 | 0.322 | 4.67E-214 | BLVRB    | 19 | HBB_Erthyroid cell  |
| 915 | 0         | 2.283214792 | 0.945 | 0.023 | 0         | SNCA     | 19 | HBB_Erthyroid cell  |
| 916 | 0         | 2.227101344 | 0.933 | 0.002 | 0         | RHAG     | 19 | HBB_Erthyroid cell  |
| 917 | 0         | 2.143365069 | 0.945 | 0.134 | 0         | UROD     | 19 | HBB_Erthyroid cell  |
| 918 | 9.63E-288 | 2.01553864  | 0.941 | 0.179 | 2.10E-283 | SLC25A39 | 19 | HBB_Erthyroid cell  |
| 919 | 2.03E-99  | 1.804105451 | 0.776 | 0.294 | 4.43E-95  | HIST1H4C | 19 | HBB_Erthyroid cell  |
| 920 | 4.89E-122 | 1.746690586 | 0.62  | 0.13  | 1.07E-117 | HIST1H1C | 19 | HBB_Erthyroid cell  |
| 921 | 5.05E-158 | 1.742049467 | 0.976 | 0.5   | 1.10E-153 | GYPC     | 19 | HBB_Erthyroid cell  |
| 922 | 0         | 1.739096462 | 0.922 | 0.131 | 0         | TFRC     | 19 | HBB_Erthyroid cell  |
| 923 | 0         | 1.714647902 | 0.859 | 0.002 | 0         | EPB42    | 19 | HBB_Erthyroid cell  |
| 924 | 0         | 1.711761962 | 0.851 | 0.003 | 0         | KLF1     | 19 | HBB_Erthyroid cell  |
| 925 | 0         | 1.67122467  | 0.875 | 0.037 | 0         | FECH     | 19 | HBB_Erthyroid cell  |
| 926 | 0         | 1.658735964 | 0.902 | 0.087 | 0         | FAM210B  | 19 | HBB_Erthyroid cell  |
| 927 | 0         | 1.63989989  | 0.753 | 0.047 | 0         | TUBG1    | 19 | HBB_Erthyroid cell  |
| 928 | 1.13E-242 | 1.629014345 | 0.922 | 0.196 | 2.46E-238 | CAT      | 19 | HBB_Erthyroid cell  |
| 929 | 0         | 1.587892528 | 0.69  | 0.054 | 0         | RRM2     | 19 | HBB_Erthyroid cell  |
| 930 | 0         | 1.587272404 | 0.851 | 0.018 | 0         | SELENBP1 | 19 | HBB_Erthyroid cell  |
| 931 | 0         | 1.574326634 | 0.773 | 0.013 | 0         | SMIM1    | 19 | HBB_Erthyroid cell  |
| 932 | 1.34E-83  | 1.571058159 | 0.867 | 0.592 | 2.91E-79  | TUBA1B   | 19 | HBB_Erthyroid cell  |
| 933 | 0         | 1.559720175 | 0.761 | 0.001 | 0         | MYL4     | 19 | HBB_Erthyroid cell  |
| 934 | 0         | 1.548649528 | 0.827 | 0.012 | 0         | RFESD    | 19 | HBB_Erthyroid cell  |
| 935 | 0         | 1.507072839 | 0.773 | 0.001 | 0         | RHD      | 19 | HBB_Erthyroid cell  |
| 936 | 1.60E-87  | 1.490251075 | 0.851 | 0.52  | 3.49E-83  | TUBB     | 19 | HBB_Erthyroid cell  |
| 937 | 0         | 1.462719431 | 0.804 | 0.08  | 0         | UBAC1    | 19 | HBB_Erthyroid cell  |
| 938 | 5.91E-108 | 1.459082059 | 0.867 | 0.387 | 1.29E-103 | HMGB2    | 19 | HBB_Erthyroid cell  |
| 939 | 0         | 1.433653565 | 0.765 | 0.012 | 0         | TMEM56   | 19 | HBB_Erthyroid cell  |
| 940 | 2.08E-146 | 1.422555859 | 0.914 | 0.352 | 4.54E-142 | RAD23A   | 19 | HBB_Erthyroid cell  |
| 941 | 0         | 1.419604731 | 0.78  | 0.001 | 0         | SPTA1    | 19 | HBB_Erthyroid cell  |
| 942 | 7.34E-122 | 1.413583031 | 0.875 | 0.366 | 1.60E-117 | MGST3    | 19 | HBB_Erthyroid cell  |
| 943 | 0         | 1.398335667 | 0.8   | 0.01  | 0         | DMTN     | 19 | HBB_Erthyroid cell  |
| 944 | 0         | 1.395538618 | 0.663 | 0.062 | 0         | NUSAP1   | 19 | HBB_Erthyroid cell  |
| 945 | 0         | 1.393460333 | 0.769 | 0.067 | 0         | MINPP1   | 19 | HBB_Erthyroid cell  |
| 946 | 0         | 1.35104072  | 0.749 | 0.008 | 0         | CR1L     | 19 | HBB_Erthyroid cell  |
| 947 | 0         | 4.579099362 | 0.825 | 0.038 | 0         | TAGLN    | 20 | TAGLN_Stellate cell |

|      |           |             |       |       |           |             |    |                     |
|------|-----------|-------------|-------|-------|-----------|-------------|----|---------------------|
| 948  | 0         | 4.020183312 | 0.929 | 0.022 | 0         | MYL9        | 20 | TAGLN_Stellate cell |
| 949  | 4.12E-269 | 3.878885813 | 0.802 | 0.061 | 8.99E-265 | ACTA2       | 20 | TAGLN_Stellate cell |
| 950  | 0         | 3.808886202 | 0.905 | 0.033 | 0         | TPM2        | 20 | TAGLN_Stellate cell |
| 951  | 2.67E-12  | 3.50884363  | 0.135 | 0.03  | 5.83E-08  | ITLN1       | 20 | TAGLN_Stellate cell |
| 952  | 0         | 3.472012145 | 0.865 | 0.058 | 0         | ADIRF       | 20 | TAGLN_Stellate cell |
| 953  | 0         | 3.390960243 | 0.46  | 0.005 | 0         | RGS5        | 20 | TAGLN_Stellate cell |
| 954  | 0         | 3.264398794 | 0.817 | 0.047 | 0         | SPARCL1     | 20 | TAGLN_Stellate cell |
| 955  | 0         | 3.123554893 | 0.794 | 0.005 | 0         | IGFBP5      | 20 | TAGLN_Stellate cell |
| 956  | 0         | 3.096453529 | 0.937 | 0.061 | 0         | CALD1       | 20 | TAGLN_Stellate cell |
| 957  | 6.67E-221 | 3.079258717 | 0.881 | 0.095 | 1.45E-216 | TPM1        | 20 | TAGLN_Stellate cell |
| 958  | 4.94E-104 | 3.042009988 | 0.889 | 0.234 | 1.08E-99  | IGFBP7      | 20 | TAGLN_Stellate cell |
| 959  | 0         | 2.881895781 | 0.69  | 0.005 | 0         | MYH11       | 20 | TAGLN_Stellate cell |
| 960  | 0         | 2.754604744 | 0.794 | 0.006 | 0         | SOD3        | 20 | TAGLN_Stellate cell |
| 961  | 7.00E-77  | 2.631381337 | 0.897 | 0.36  | 1.53E-72  | DSTN        | 20 | TAGLN_Stellate cell |
| 962  | 1.11E-232 | 2.598842105 | 0.825 | 0.075 | 2.42E-228 | BGN         | 20 | TAGLN_Stellate cell |
| 963  | 9.00E-216 | 2.519586359 | 0.762 | 0.064 | 1.96E-211 | MT1M        | 20 | TAGLN_Stellate cell |
| 964  | 0         | 2.424245096 | 0.492 | 0.001 | 0         | PLN         | 20 | TAGLN_Stellate cell |
| 965  | 3.46E-100 | 2.269063463 | 0.389 | 0.034 | 7.54E-96  | MT1A        | 20 | TAGLN_Stellate cell |
| 966  | 3.24E-163 | 2.268400285 | 0.135 | 0.002 | 7.06E-159 | PRG4        | 20 | TAGLN_Stellate cell |
| 967  | 0         | 2.236481748 | 0.492 | 0.001 | 0         | RERGL       | 20 | TAGLN_Stellate cell |
| 968  | 2.69E-202 | 2.141477105 | 0.738 | 0.069 | 5.86E-198 | MFGE8       | 20 | TAGLN_Stellate cell |
| 969  | 1.06E-240 | 2.131240591 | 0.667 | 0.044 | 2.31E-236 | PPP1R14A    | 20 | TAGLN_Stellate cell |
| 970  | 0         | 2.106229026 | 0.579 | 0.018 | 0         | IGFBP6      | 20 | TAGLN_Stellate cell |
| 971  | 7.59E-162 | 2.070437653 | 0.659 | 0.065 | 1.65E-157 | C11orf96    | 20 | TAGLN_Stellate cell |
| 972  | 0         | 2.066149502 | 0.452 | 0.002 | 0         | NDUFA4L2    | 20 | TAGLN_Stellate cell |
| 973  | 0         | 2.050417045 | 0.683 | 0.004 | 0         | CRYAB       | 20 | TAGLN_Stellate cell |
| 974  | 7.55E-39  | 1.995990546 | 0.135 | 0.011 | 1.65E-34  | SLPI        | 20 | TAGLN_Stellate cell |
| 975  | 0         | 1.981824069 | 0.73  | 0.013 | 0         | PLAC9       | 20 | TAGLN_Stellate cell |
| 976  | 0         | 1.939412452 | 0.69  | 0.016 | 0         | CSRP2       | 20 | TAGLN_Stellate cell |
| 977  | 6.53E-187 | 1.877318163 | 0.706 | 0.065 | 1.42E-182 | BCAM        | 20 | TAGLN_Stellate cell |
| 978  | 1.06E-110 | 1.87170925  | 0.881 | 0.178 | 2.31E-106 | MT1E        | 20 | TAGLN_Stellate cell |
| 979  | 3.02E-79  | 1.859862368 | 0.675 | 0.147 | 6.58E-75  | CSRP1       | 20 | TAGLN_Stellate cell |
| 980  | 0         | 1.859691429 | 0.444 | 0.001 | 0         | DCN         | 20 | TAGLN_Stellate cell |
| 981  | 1.97E-22  | 1.85471231  | 0.659 | 0.337 | 4.29E-18  | MT1X        | 20 | TAGLN_Stellate cell |
| 982  | 9.27E-104 | 1.8478268   | 0.754 | 0.139 | 2.02E-99  | SELM        | 20 | TAGLN_Stellate cell |
| 983  | 0         | 1.838218858 | 0.508 | 0.002 | 0         | MFAP4       | 20 | TAGLN_Stellate cell |
| 984  | 9.71E-268 | 1.837690808 | 0.817 | 0.056 | 2.12E-263 | MGP         | 20 | TAGLN_Stellate cell |
| 985  | 5.08E-130 | 1.83405978  | 0.794 | 0.118 | 1.11E-125 | SERPING1    | 20 | TAGLN_Stellate cell |
| 986  | 3.33E-40  | 1.821010937 | 0.841 | 0.513 | 7.26E-36  | CRIP1       | 20 | TAGLN_Stellate cell |
| 987  | 0         | 1.798561864 | 0.603 | 0.009 | 0         | MYLK        | 20 | TAGLN_Stellate cell |
| 988  | 0         | 1.77925811  | 0.683 | 0.016 | 0         | MAP1B       | 20 | TAGLN_Stellate cell |
| 989  | 1.97E-194 | 1.747686177 | 0.667 | 0.055 | 4.30E-190 | ISYNA1      | 20 | TAGLN_Stellate cell |
| 990  | 0         | 1.737070554 | 0.437 | 0.008 | 0         | FABP4       | 20 | TAGLN_Stellate cell |
| 991  | 7.35E-143 | 1.723227005 | 0.786 | 0.108 | 1.60E-138 | CAV1        | 20 | TAGLN_Stellate cell |
| 992  | 2.24E-154 | 1.722626861 | 0.659 | 0.069 | 4.89E-150 | PALLD       | 20 | TAGLN_Stellate cell |
| 993  | 2.03E-25  | 1.71055467  | 0.286 | 0.061 | 4.42E-21  | CCL2        | 20 | TAGLN_Stellate cell |
| 994  | 0         | 1.700424204 | 0.714 | 0.028 | 0         | PRKCDBP     | 20 | TAGLN_Stellate cell |
| 995  | 3.18E-46  | 1.68126467  | 0.286 | 0.039 | 6.93E-42  | CFH         | 20 | TAGLN_Stellate cell |
| 996  | 1.03E-106 | 1.670536401 | 0.548 | 0.068 | 2.24E-102 | NET1        | 20 | TAGLN_Stellate cell |
| 997  | 0         | 5.132647075 | 1     | 0.072 | 0         | SAA1        | 21 | SAA1_Hepatocyte     |
| 998  | 9.69E-185 | 4.955501969 | 1     | 0.164 | 2.11E-180 | ALB         | 21 | SAA1_Hepatocyte     |
| 999  | 0         | 4.908471192 | 1     | 0.048 | 0         | APOC3       | 21 | SAA1_Hepatocyte     |
| 1000 | 1.02E-298 | 4.855125512 | 0.992 | 0.088 | 2.23E-294 | MT1G        | 21 | SAA1_Hepatocyte     |
| 1001 | 0         | 4.395086513 | 0.984 | 0.031 | 0         | SAA2        | 21 | SAA1_Hepatocyte     |
| 1002 | 8.23E-228 | 4.375837349 | 1     | 0.126 | 1.79E-223 | APOC1       | 21 | SAA1_Hepatocyte     |
| 1003 | 9.32E-122 | 4.307425515 | 1     | 0.291 | 2.03E-117 | SERPINA1    | 21 | SAA1_Hepatocyte     |
| 1004 | 0         | 4.267782532 | 0.852 | 0.02  | 0         | CYP2E1      | 21 | SAA1_Hepatocyte     |
| 1005 | 0         | 4.207786357 | 0.951 | 0.026 | 0         | TTR         | 21 | SAA1_Hepatocyte     |
| 1006 | 0         | 4.170767324 | 0.943 | 0.02  | 0         | APOA2       | 21 | SAA1_Hepatocyte     |
| 1007 | 1.28E-294 | 4.155772892 | 0.943 | 0.077 | 2.78E-290 | HP          | 21 | SAA1_Hepatocyte     |
| 1008 | 0         | 4.152809542 | 0.959 | 0.054 | 0         | ORM1        | 21 | SAA1_Hepatocyte     |
| 1009 | 0         | 4.109291027 | 0.992 | 0.037 | 0         | ASS1        | 21 | SAA1_Hepatocyte     |
| 1010 | 0         | 4.10269421  | 0.992 | 0.018 | 0         | ADH1B       | 21 | SAA1_Hepatocyte     |
| 1011 | 0         | 3.922137094 | 0.836 | 0.042 | 0         | APOA1       | 21 | SAA1_Hepatocyte     |
| 1012 | 0         | 3.911271711 | 0.967 | 0.016 | 0         | APOC4-APOC2 | 21 | SAA1_Hepatocyte     |
| 1013 | 0         | 3.829311263 | 0.91  | 0.024 | 0         | RBP4        | 21 | SAA1_Hepatocyte     |
| 1014 | 4.44E-123 | 3.744710648 | 1     | 0.289 | 9.69E-119 | DCXR        | 21 | SAA1_Hepatocyte     |
| 1015 | 2.73E-110 | 3.612768183 | 1     | 0.334 | 5.95E-106 | MT1X        | 21 | SAA1_Hepatocyte     |
| 1016 | 0         | 3.606831252 | 0.975 | 0.011 | 0         | HPD         | 21 | SAA1_Hepatocyte     |
| 1017 | 0         | 3.597663616 | 0.967 | 0.062 | 0         | MT1M        | 21 | SAA1_Hepatocyte     |
| 1018 | 0         | 3.587194836 | 0.934 | 0.012 | 0         | FABP1       | 21 | SAA1_Hepatocyte     |
| 1019 | 0         | 3.485192369 | 0.975 | 0.01  | 0         | AGXT        | 21 | SAA1_Hepatocyte     |
| 1020 | 5.34E-167 | 3.409252424 | 0.992 | 0.177 | 1.17E-162 | MT1E        | 21 | SAA1_Hepatocyte     |

|      |           |             |       |       |             |           |    |                      |
|------|-----------|-------------|-------|-------|-------------|-----------|----|----------------------|
| 1021 | 0         | 3.392463114 | 0.811 | 0.028 | 0           | FGG       | 21 | SAA1_Hepatocyte      |
| 1022 | 0         | 3.389460076 | 0.705 | 0.018 | 0           | HAMP      | 21 | SAA1_Hepatocyte      |
| 1023 | 0         | 3.356834625 | 0.828 | 0.014 | 0           | MT1H      | 21 | SAA1_Hepatocyte      |
| 1024 | 0         | 3.268562657 | 0.934 | 0.022 | 0           | NNMT      | 21 | SAA1_Hepatocyte      |
| 1025 | 2.07E-221 | 3.267738949 | 0.975 | 0.119 | 4.51E-217   | MT1F      | 21 | SAA1_Hepatocyte      |
| 1026 | 0         | 3.218392093 | 0.82  | 0.032 | 0           | FGB       | 21 | SAA1_Hepatocyte      |
| 1027 | 0         | 3.145660966 | 0.959 | 0.008 | 0           | GNMT      | 21 | SAA1_Hepatocyte      |
| 1028 | 0         | 3.13605049  | 0.951 | 0.012 | 0           | ALDOB     | 21 | SAA1_Hepatocyte      |
| 1029 | 2.50E-156 | 3.061578256 | 0.992 | 0.199 | 5.46E-152   | CYB5A     | 21 | SAA1_Hepatocyte      |
| 1030 | 0         | 3.031263948 | 0.934 | 0.054 | 0           | HRSP12    | 21 | SAA1_Hepatocyte      |
| 1031 | 0         | 3.009319266 | 0.951 | 0.006 | 0           | TAT       | 21 | SAA1_Hepatocyte      |
| 1032 | 0         | 2.966286556 | 0.918 | 0.006 | 0           | GSTA1     | 21 | SAA1_Hepatocyte      |
| 1033 | 0         | 2.915044752 | 0.918 | 0.026 | 0           | VTN       | 21 | SAA1_Hepatocyte      |
| 1034 | 0         | 2.905684131 | 0.844 | 0.024 | 0           | AMBP      | 21 | SAA1_Hepatocyte      |
| 1035 | 0         | 2.902679699 | 0.91  | 0.004 | 0           | ADH4      | 21 | SAA1_Hepatocyte      |
| 1036 | 0         | 2.797854864 | 0.836 | 0.004 | 0           | TDO2      | 21 | SAA1_Hepatocyte      |
| 1037 | 0         | 2.734926993 | 0.705 | 0.005 | 0           | SAA4      | 21 | SAA1_Hepatocyte      |
| 1038 | 0         | 2.71065212  | 0.902 | 0.013 | 0           | ARG1      | 21 | SAA1_Hepatocyte      |
| 1039 | 0         | 2.682378712 | 0.828 | 0.021 | 0           | SERPINA3  | 21 | SAA1_Hepatocyte      |
| 1040 | 0         | 2.677449419 | 0.877 | 0.004 | 0           | SULT2A1   | 21 | SAA1_Hepatocyte      |
| 1041 | 0         | 2.644996158 | 0.877 | 0.045 | 0           | GATM      | 21 | SAA1_Hepatocyte      |
| 1042 | 1.92E-235 | 2.643035913 | 0.885 | 0.081 | 4.20E-231   | APOE      | 21 | SAA1_Hepatocyte      |
| 1043 | 0         | 2.607868258 | 0.697 | 0.015 | 0           | APOH      | 21 | SAA1_Hepatocyte      |
| 1044 | 1.09E-177 | 2.603649386 | 0.902 | 0.128 | 2.37E-173   | GSTM1     | 21 | SAA1_Hepatocyte      |
| 1045 | 3.34E-98  | 2.60155431  | 0.984 | 0.378 | 7.28E-94    | PEBP1     | 21 | SAA1_Hepatocyte      |
| 1046 | 1.29E-131 | 2.540096638 | 0.975 | 0.234 | 2.82E-127   | ADI1      | 21 | SAA1_Hepatocyte      |
| 1047 | 1.78E-166 | 1.643592673 | 0.78  | 0.079 | 3.87E-162   | HP        | 22 | Mixed cell           |
| 1048 | 9.17E-117 | 1.548503587 | 0.899 | 0.165 | 2.00E-112   | ALB       | 22 | Mixed cell           |
| 1049 | 2.56E-184 | 1.457106131 | 0.706 | 0.056 | 5.57E-180   | ORM1      | 22 | Mixed cell           |
| 1050 | 9.26E-140 | 1.396494573 | 0.495 | 0.035 | 2.02E-135   | FGB       | 22 | Mixed cell           |
| 1051 | 1.83E-89  | 1.155698286 | 0.45  | 0.045 | 3.99E-85    | APOA1     | 22 | Mixed cell           |
| 1052 | 3.25E-131 | 1.102201116 | 0.459 | 0.032 | 7.08E-127   | FGG       | 22 | Mixed cell           |
| 1053 | 6.15E-130 | 1.093839445 | 0.385 | 0.023 | 1.34E-125   | FGA       | 22 | Mixed cell           |
| 1054 | 1.01E-131 | 1.024450354 | 0.321 | 0.015 | 2.21E-127   | TF        | 22 | Mixed cell           |
| 1055 | 2.65E-84  | 0.86696482  | 0.367 | 0.031 | 5.78E-80    | VTN       | 22 | Mixed cell           |
| 1056 | 1.01E-107 | 0.848443232 | 0.312 | 0.018 | 2.21E-103   | HPX       | 22 | Mixed cell           |
| 1057 | 1.39E-74  | 0.845868481 | 0.33  | 0.028 | 3.03E-70    | AMBP      | 22 | Mixed cell           |
| 1058 | 1.98E-83  | 0.823347422 | 0.56  | 0.076 | 4.31E-79    | SAA1      | 22 | Mixed cell           |
| 1059 | 4.19E-107 | 0.805190717 | 0.321 | 0.019 | 9.14E-103   | APOH      | 22 | Mixed cell           |
| 1060 | 6.04E-07  | 0.788032669 | 0.284 | 0.132 | 0.013161746 | CD79A     | 22 | Mixed cell           |
| 1061 | 1.10E-14  | 0.740794952 | 0.284 | 0.081 | 2.40E-10    | MS4A1     | 22 | Mixed cell           |
| 1062 | 5.56E-10  | 0.702264096 | 0.128 | 0.029 | 1.21E-05    | TCL1A     | 22 | Mixed cell           |
| 1063 | 5.53E-37  | 0.682900624 | 0.431 | 0.086 | 1.21E-32    | APOE      | 22 | Mixed cell           |
| 1064 | 6.65E-64  | 0.677614783 | 0.321 | 0.031 | 1.45E-59    | TTR       | 22 | Mixed cell           |
| 1065 | 1.27E-20  | 0.649230296 | 1     | 0.981 | 2.77E-16    | MT-ND3    | 22 | Mixed cell           |
| 1066 | 9.28E-62  | 0.641544395 | 0.413 | 0.054 | 2.02E-57    | APOC3     | 22 | Mixed cell           |
| 1067 | 5.40E-20  | 0.640815067 | 0.651 | 0.294 | 1.18E-15    | SERPINA1  | 22 | Mixed cell           |
| 1068 | 5.81E-08  | 0.628359144 | 0.266 | 0.117 | 0.001267873 | A1BG      | 22 | Mixed cell           |
| 1069 | 1.11E-12  | 0.628345078 | 0.211 | 0.055 | 2.42E-08    | BANK1     | 22 | Mixed cell           |
| 1070 | 6.43E-85  | 0.619996175 | 0.394 | 0.036 | 1.40E-80    | SAA2      | 22 | Mixed cell           |
| 1071 | 1.68E-08  | 0.617835602 | 0.725 | 0.604 | 0.000366148 | CD37      | 22 | Mixed cell           |
| 1072 | 5.41E-52  | 0.608240782 | 0.202 | 0.015 | 1.18E-47    | AZGP1     | 22 | Mixed cell           |
| 1073 | 2.57E-10  | 0.607493245 | 0.853 | 0.674 | 5.61E-06    | TXNIP     | 22 | Mixed cell           |
| 1074 | 8.06E-19  | 0.604788414 | 0.954 | 0.917 | 1.76E-14    | RPS29     | 22 | Mixed cell           |
| 1075 | 5.63E-41  | 0.598655192 | 0.239 | 0.026 | 1.23E-36    | SERPINA3  | 22 | Mixed cell           |
| 1076 | 2.27E-12  | 0.58453115  | 0.963 | 0.952 | 4.94E-08    | MT-ND4    | 22 | Mixed cell           |
| 1077 | 2.02E-09  | 0.579264631 | 0.183 | 0.055 | 4.41E-05    | ADAM28    | 22 | Mixed cell           |
| 1078 | 2.42E-09  | 0.572361263 | 0.587 | 0.355 | 5.28E-05    | STK17A    | 22 | Mixed cell           |
| 1079 | 5.89E-11  | 0.569841088 | 0.945 | 0.925 | 1.28E-06    | MT-ND2    | 22 | Mixed cell           |
| 1080 | 9.18E-33  | 0.568616995 | 0.202 | 0.024 | 2.00E-28    | C3        | 22 | Mixed cell           |
| 1081 | 8.34E-15  | 0.55157898  | 0.872 | 0.48  | 1.82E-10    | CD69      | 22 | Mixed cell           |
| 1082 | 8.23E-12  | 0.547437484 | 0.697 | 0.413 | 1.79E-07    | IL2RG     | 22 | Mixed cell           |
| 1083 | 3.40E-52  | 0.545417057 | 0.119 | 0.005 | 7.41E-48    | PLG       | 22 | Mixed cell           |
| 1084 | 2.83E-10  | 0.544596299 | 0.44  | 0.202 | 6.17E-06    | LTB       | 22 | Mixed cell           |
| 1085 | 4.12E-09  | 0.544513475 | 0.156 | 0.043 | 8.98E-05    | LINC00926 | 22 | Mixed cell           |
| 1086 | 6.44E-45  | 0.543541553 | 0.266 | 0.03  | 1.40E-40    | RBP4      | 22 | Mixed cell           |
| 1087 | 3.66E-08  | 0.539145912 | 0.44  | 0.237 | 0.00079853  | FCMR      | 22 | Mixed cell           |
| 1088 | 0         | 4.090608533 | 1     | 0.009 | 0           | FXYD2     | 23 | FXYD2_Cholangiocytes |
| 1089 | 0         | 3.722191417 | 0.962 | 0.007 | 0           | DEFB1     | 23 | FXYD2_Cholangiocytes |
| 1090 | 0         | 3.402967943 | 0.962 | 0.034 | 0           | KRT18     | 23 | FXYD2_Cholangiocytes |
| 1091 | 0         | 3.3333814   | 0.936 | 0.034 | 0           | KRT8      | 23 | FXYD2_Cholangiocytes |
| 1092 | 7.88E-120 | 3.133011514 | 0.974 | 0.154 | 1.72E-115   | ANXA4     | 23 | FXYD2_Cholangiocytes |
| 1093 | 3.84E-181 | 3.009714787 | 1     | 0.096 | 8.38E-177   | CLU       | 23 | FXYD2_Cholangiocytes |



|      |           |             |       |       |           |            |    |                      |
|------|-----------|-------------|-------|-------|-----------|------------|----|----------------------|
| 1094 | 1.59E-104 | 3.005161694 | 0.962 | 0.167 | 3.47E-100 | ALB        | 23 | FXYD2_Cholangiocytes |
| 1095 | 0         | 2.753970475 | 0.923 | 0.026 | 0         | AMBP       | 23 | FXYD2_Cholangiocytes |
| 1096 | 0         | 2.664376115 | 0.756 | 0.003 | 0         | ELF3       | 23 | FXYD2_Cholangiocytes |
| 1097 | 0         | 2.623406999 | 0.718 | 0.001 | 0         | CLDN4      | 23 | FXYD2_Cholangiocytes |
| 1098 | 0         | 2.5328405   | 0.795 | 0.004 | 0         | KRT7       | 23 | FXYD2_Cholangiocytes |
| 1099 | 1.01E-74  | 2.513762067 | 1     | 0.293 | 2.20E-70  | SERPINA1   | 23 | FXYD2_Cholangiocytes |
| 1100 | 0         | 2.485758072 | 0.808 | 0.006 | 0         | SPP1       | 23 | FXYD2_Cholangiocytes |
| 1101 | 0         | 2.481782091 | 0.859 | 0.007 | 0         | AGT        | 23 | FXYD2_Cholangiocytes |
| 1102 | 4.13E-39  | 2.344748179 | 0.41  | 0.061 | 9.01E-35  | CCL2       | 23 | FXYD2_Cholangiocytes |
| 1103 | 0         | 2.271946598 | 0.731 | 0.024 | 0         | SERPINA3   | 23 | FXYD2_Cholangiocytes |
| 1104 | 0         | 2.271845849 | 0.872 | 0.029 | 0         | VTN        | 23 | FXYD2_Cholangiocytes |
| 1105 | 0         | 2.243689804 | 0.859 | 0.002 | 0         | TM4SF4     | 23 | FXYD2_Cholangiocytes |
| 1106 | 0         | 2.237707002 | 0.795 | 0.011 | 0         | PAH        | 23 | FXYD2_Cholangiocytes |
| 1107 | 0         | 2.204966169 | 0.744 | 0.021 | 0         | C3         | 23 | FXYD2_Cholangiocytes |
| 1108 | 3.37E-245 | 2.184814632 | 0.718 | 0.031 | 7.36E-241 | FGG        | 23 | FXYD2_Cholangiocytes |
| 1109 | 1.09E-92  | 2.055927093 | 0.526 | 0.046 | 2.37E-88  | TNFRSF12A  | 23 | FXYD2_Cholangiocytes |
| 1110 | 0         | 2.050766644 | 0.782 | 0.028 | 0         | RBP4       | 23 | FXYD2_Cholangiocytes |
| 1111 | 3.32E-103 | 2.021555151 | 0.859 | 0.12  | 7.24E-99  | SERPING1   | 23 | FXYD2_Cholangiocytes |
| 1112 | 0         | 2.009209175 | 0.577 | 0.002 | 0         | TACSTD2    | 23 | FXYD2_Cholangiocytes |
| 1113 | 1.71E-79  | 1.992566207 | 0.91  | 0.18  | 3.74E-75  | MT1E       | 23 | FXYD2_Cholangiocytes |
| 1114 | 0         | 1.988095152 | 0.679 | 0     | 0         | SFRP5      | 23 | FXYD2_Cholangiocytes |
| 1115 | 0         | 1.942969308 | 0.731 | 0.011 | 0         | GC         | 23 | FXYD2_Cholangiocytes |
| 1116 | 0         | 1.935014351 | 0.667 | 0.003 | 0         | KRT19      | 23 | FXYD2_Cholangiocytes |
| 1117 | 0         | 1.901743443 | 0.731 | 0.006 | 0         | SERPINA5   | 23 | FXYD2_Cholangiocytes |
| 1118 | 3.52E-60  | 1.890875349 | 0.295 | 0.021 | 7.68E-56  | SCGB3A1    | 23 | FXYD2_Cholangiocytes |
| 1119 | 0         | 1.832446429 | 0.654 | 0.002 | 0         | CLDN3      | 23 | FXYD2_Cholangiocytes |
| 1120 | 0         | 1.816628874 | 0.718 | 0.002 | 0         | CLDN10     | 23 | FXYD2_Cholangiocytes |
| 1121 | 5.99E-154 | 1.814532757 | 0.731 | 0.055 | 1.31E-149 | SH3YL1     | 23 | FXYD2_Cholangiocytes |
| 1122 | 0         | 1.803137164 | 0.397 | 0.001 | 0         | UBD        | 23 | FXYD2_Cholangiocytes |
| 1123 | 0         | 1.767006421 | 0.59  | 0.003 | 0         | LGALS4     | 23 | FXYD2_Cholangiocytes |
| 1124 | 0         | 1.766142107 | 0.526 | 0.001 | 0         | CXCL6      | 23 | FXYD2_Cholangiocytes |
| 1125 | 1.53E-137 | 1.746881953 | 0.756 | 0.064 | 3.33E-133 | CD24       | 23 | FXYD2_Cholangiocytes |
| 1126 | 0         | 1.73522367  | 0.538 | 0.012 | 0         | SERPINA3.1 | 23 | FXYD2_Cholangiocytes |
| 1127 | 0         | 1.732807046 | 0.577 | 0.004 | 0         | CYP3A5     | 23 | FXYD2_Cholangiocytes |
| 1128 | 0         | 1.706893406 | 0.564 | 0.003 | 0         | CLDN1      | 23 | FXYD2_Cholangiocytes |
| 1129 | 6.95E-66  | 1.687863082 | 0.385 | 0.033 | 1.52E-61  | CXCL1      | 23 | FXYD2_Cholangiocytes |
| 1130 | 0         | 1.561778398 | 0.5   | 0.001 | 0         | PIGR       | 23 | FXYD2_Cholangiocytes |
| 1131 | 6.56E-236 | 1.538711155 | 0.603 | 0.022 | 1.43E-231 | FGA        | 23 | FXYD2_Cholangiocytes |
| 1132 | 1.98E-79  | 1.528033991 | 0.436 | 0.035 | 4.31E-75  | CYR61      | 23 | FXYD2_Cholangiocytes |
| 1133 | 4.15E-50  | 1.523724761 | 0.628 | 0.118 | 9.04E-46  | ANPEP      | 23 | FXYD2_Cholangiocytes |
| 1134 | 6.29E-59  | 1.506242135 | 0.833 | 0.202 | 1.37E-54  | CYB5A      | 23 | FXYD2_Cholangiocytes |
| 1135 | 3.52E-255 | 1.504252034 | 0.5   | 0.013 | 7.68E-251 | APCS       | 23 | FXYD2_Cholangiocytes |
| 1136 | 1.94E-160 | 1.487222388 | 0.679 | 0.042 | 4.23E-156 | AQP1       | 23 | FXYD2_Cholangiocytes |
| 1137 | 9.22E-158 | 1.483045464 | 0.308 | 0.008 | 2.01E-153 | CRYAB      | 23 | FXYD2_Cholangiocytes |
| 1138 | 2.89E-110 | 2.690017156 | 0.979 | 0.091 | 6.30E-106 | C7         | 24 | C7_Endo              |
| 1139 | 5.47E-64  | 2.528139896 | 1     | 0.176 | 1.19E-59  | RNASE1     | 24 | C7_Endo              |
| 1140 | 8.09E-166 | 2.524143108 | 0.854 | 0.043 | 1.76E-161 | VWF        | 24 | C7_Endo              |
| 1141 | 2.06E-69  | 2.476587179 | 1     | 0.169 | 4.50E-65  | PRSS23     | 24 | C7_Endo              |
| 1142 | 6.49E-92  | 2.353297284 | 1     | 0.117 | 1.41E-87  | RAMP3      | 24 | C7_Endo              |
| 1143 | 1.79E-81  | 2.089524027 | 0.917 | 0.103 | 3.90E-77  | LIFR       | 24 | C7_Endo              |
| 1144 | 0         | 2.086896603 | 0.458 | 0.003 | 0         | POSTN      | 24 | C7_Endo              |
| 1145 | 0         | 2.081967043 | 0.667 | 0.01  | 0         | IL1RL1     | 24 | C7_Endo              |
| 1146 | 1.51E-133 | 2.070473399 | 0.979 | 0.075 | 3.29E-129 | IL1R1      | 24 | C7_Endo              |
| 1147 | 1.85E-57  | 2.045595847 | 0.979 | 0.183 | 4.04E-53  | ENG        | 24 | C7_Endo              |
| 1148 | 2.08E-36  | 1.965544083 | 0.625 | 0.1   | 4.54E-32  | EMP1       | 24 | C7_Endo              |
| 1149 | 5.45E-30  | 1.959055698 | 1     | 0.431 | 1.19E-25  | TIMP1      | 24 | C7_Endo              |
| 1150 | 0         | 1.915369417 | 0.833 | 0.019 | 0         | ADGRG6     | 24 | C7_Endo              |
| 1151 | 6.12E-177 | 1.911269793 | 0.896 | 0.045 | 1.33E-172 | LTC4S      | 24 | C7_Endo              |
| 1152 | 3.05E-36  | 1.910180857 | 0.896 | 0.226 | 6.65E-32  | CXCL2      | 24 | C7_Endo              |
| 1153 | 7.62E-77  | 1.885998123 | 0.938 | 0.115 | 1.66E-72  | HSPG2      | 24 | C7_Endo              |
| 1154 | 1.33E-116 | 1.86741065  | 0.979 | 0.082 | 2.90E-112 | SRPX       | 24 | C7_Endo              |
| 1155 | 1.16E-72  | 1.862428156 | 1     | 0.126 | 2.54E-68  | DNASE1L3   | 24 | C7_Endo              |
| 1156 | 4.96E-85  | 1.85636617  | 0.917 | 0.099 | 1.08E-80  | PTPRB      | 24 | C7_Endo              |
| 1157 | 0         | 1.804522115 | 0.5   | 0.006 | 0         | SELE       | 24 | C7_Endo              |
| 1158 | 1.33E-44  | 1.803585811 | 0.938 | 0.212 | 2.91E-40  | APP        | 24 | C7_Endo              |
| 1159 | 3.02E-59  | 1.776707571 | 0.625 | 0.061 | 6.58E-55  | CCL2       | 24 | C7_Endo              |
| 1160 | 5.71E-61  | 1.771963497 | 1     | 0.159 | 1.24E-56  | TFPI       | 24 | C7_Endo              |
| 1161 | 1.62E-57  | 1.764055833 | 0.958 | 0.142 | 3.54E-53  | TM4SF1     | 24 | C7_Endo              |
| 1162 | 2.30E-27  | 1.750144402 | 0.438 | 0.061 | 5.02E-23  | MGP        | 24 | C7_Endo              |
| 1163 | 0         | 1.730102148 | 0.75  | 0.003 | 0         | RSPO3      | 24 | C7_Endo              |
| 1164 | 1.80E-47  | 1.728035209 | 1     | 0.237 | 3.92E-43  | IGFBP7     | 24 | C7_Endo              |
| 1165 | 2.59E-286 | 1.727282735 | 0.396 | 0.004 | 5.66E-282 | CSF3       | 24 | C7_Endo              |
| 1166 | 2.29E-70  | 1.705669999 | 1     | 0.135 | 4.99E-66  | TIMP3      | 24 | C7_Endo              |

|      |           |             |       |       |           |          |    |            |
|------|-----------|-------------|-------|-------|-----------|----------|----|------------|
| 1167 | 1.19E-127 | 1.703182048 | 0.5   | 0.018 | 2.59E-123 | CTGF     | 24 | C7_Endo    |
| 1168 | 2.44E-32  | 1.676908434 | 0.354 | 0.036 | 5.33E-28  | MT1A     | 24 | C7_Endo    |
| 1169 | 1.41E-48  | 1.654266359 | 0.729 | 0.107 | 3.08E-44  | PMP22    | 24 | C7_Endo    |
| 1170 | 3.62E-22  | 1.64770444  | 0.812 | 0.276 | 7.90E-18  | ICAM1    | 24 | C7_Endo    |
| 1171 | 4.66E-86  | 1.638483757 | 0.833 | 0.078 | 1.02E-81  | MMRN1    | 24 | C7_Endo    |
| 1172 | 8.98E-68  | 1.637098223 | 0.875 | 0.114 | 1.96E-63  | TGM2     | 24 | C7_Endo    |
| 1173 | 7.39E-35  | 1.625817077 | 0.354 | 0.034 | 1.61E-30  | CXCL1    | 24 | C7_Endo    |
| 1174 | 1.10E-16  | 1.615908667 | 0.979 | 0.658 | 2.39E-12  | MT2A     | 24 | C7_Endo    |
| 1175 | 0         | 1.615009203 | 0.812 | 0.005 | 0         | SELP     | 24 | C7_Endo    |
| 1176 | 3.45E-21  | 1.602796939 | 0.417 | 0.074 | 7.52E-17  | TFPI2    | 24 | C7_Endo    |
| 1177 | 3.41E-82  | 1.589269408 | 0.917 | 0.098 | 7.45E-78  | CLU      | 24 | C7_Endo    |
| 1178 | 0         | 1.577306214 | 0.771 | 0.007 | 0         | INMT     | 24 | C7_Endo    |
| 1179 | 8.19E-117 | 1.565327975 | 0.771 | 0.051 | 1.79E-112 | PKHD1L1  | 24 | C7_Endo    |
| 1180 | 1.35E-56  | 1.558310265 | 0.5   | 0.042 | 2.94E-52  | SERPINE1 | 24 | C7_Endo    |
| 1181 | 6.44E-66  | 1.550565485 | 0.875 | 0.104 | 1.40E-61  | AKAP12   | 24 | C7_Endo    |
| 1182 | 0         | 1.547843681 | 0.729 | 0.012 | 0         | FBLN2    | 24 | C7_Endo    |
| 1183 | 1.18E-37  | 1.546245842 | 0.938 | 0.26  | 2.57E-33  | CD59     | 24 | C7_Endo    |
| 1184 | 1.86E-86  | 1.545549346 | 0.833 | 0.079 | 4.05E-82  | LIMS2    | 24 | C7_Endo    |
| 1185 | 7.64E-59  | 1.543701683 | 0.875 | 0.125 | 1.67E-54  | PLPP1    | 24 | C7_Endo    |
| 1186 | 6.95E-66  | 1.528067387 | 0.708 | 0.071 | 1.52E-61  | GJA4     | 24 | C7_Endo    |
| 1187 | 1.17E-61  | 1.520524134 | 0.917 | 0.124 | 2.54E-57  | SDPR     | 24 | C7_Endo    |
| 1188 | 0         | 5.02097809  | 0.882 | 0.007 | 0         | CCL21    | 25 | Mixed cell |
| 1189 | 3.03E-220 | 3.869762547 | 0.971 | 0.031 | 6.60E-216 | TFF3     | 25 | Mixed cell |
| 1190 | 0         | 3.460164474 | 0.735 | 0.01  | 0         | FABP4    | 25 | Mixed cell |
| 1191 | 3.49E-93  | 2.795798443 | 0.971 | 0.078 | 7.62E-89  | MMRN1    | 25 | Mixed cell |
| 1192 | 2.55E-77  | 2.721781861 | 0.824 | 0.061 | 5.57E-73  | MGP      | 25 | Mixed cell |
| 1193 | 0         | 2.495743106 | 0.647 | 0.008 | 0         | NTS      | 25 | Mixed cell |
| 1194 | 2.02E-38  | 2.467816309 | 1     | 0.238 | 4.41E-34  | IGFBP7   | 25 | Mixed cell |
| 1195 | 6.47E-58  | 2.460111244 | 0.882 | 0.099 | 1.41E-53  | CLU      | 25 | Mixed cell |
| 1196 | 2.58E-56  | 2.229092885 | 1     | 0.136 | 5.64E-52  | GNG11    | 25 | Mixed cell |
| 1197 | 1.83E-156 | 2.217620898 | 0.853 | 0.033 | 3.98E-152 | SNCG     | 25 | Mixed cell |
| 1198 | 1.22E-45  | 2.205825119 | 0.971 | 0.16  | 2.66E-41  | TFPI     | 25 | Mixed cell |
| 1199 | 9.59E-82  | 2.175099872 | 0.853 | 0.063 | 2.09E-77  | ADIRF    | 25 | Mixed cell |
| 1200 | 0         | 2.095924093 | 0.529 | 0.004 | 0         | EFEMP1   | 25 | Mixed cell |
| 1201 | 7.04E-29  | 2.084039452 | 0.941 | 0.267 | 1.54E-24  | FABP5    | 25 | Mixed cell |
| 1202 | 1.51E-34  | 2.021199159 | 0.853 | 0.148 | 3.28E-30  | IGFBP4   | 25 | Mixed cell |
| 1203 | 1.34E-33  | 1.943029866 | 0.941 | 0.212 | 2.91E-29  | APP      | 25 | Mixed cell |
| 1204 | 3.19E-50  | 1.874432687 | 0.853 | 0.107 | 6.95E-46  | PPFIBP1  | 25 | Mixed cell |
| 1205 | 1.08E-38  | 1.859555131 | 0.853 | 0.136 | 2.35E-34  | TIMP3    | 25 | Mixed cell |
| 1206 | 4.73E-104 | 1.857514859 | 0.853 | 0.051 | 1.03E-99  | PKHD1L1  | 25 | Mixed cell |
| 1207 | 4.12E-66  | 1.84152331  | 0.912 | 0.09  | 8.99E-62  | RAMP2    | 25 | Mixed cell |
| 1208 | 8.77E-50  | 1.800632466 | 0.941 | 0.125 | 1.91E-45  | SDPR     | 25 | Mixed cell |
| 1209 | 1.14E-45  | 1.740571344 | 0.882 | 0.126 | 2.48E-41  | CNN3     | 25 | Mixed cell |
| 1210 | 4.11E-143 | 1.710754178 | 0.765 | 0.028 | 8.97E-139 | NNMT     | 25 | Mixed cell |
| 1211 | 0         | 1.696589485 | 0.412 | 0.002 | 0         | APOD     | 25 | Mixed cell |
| 1212 | 8.17E-13  | 1.649477427 | 0.353 | 0.062 | 1.78E-08  | CCL2     | 25 | Mixed cell |
| 1213 | 2.07E-21  | 1.641877794 | 0.971 | 0.492 | 4.51E-17  | ANXA2    | 25 | Mixed cell |
| 1214 | 5.35E-49  | 1.632926011 | 0.824 | 0.102 | 1.17E-44  | FXYP6    | 25 | Mixed cell |
| 1215 | 1.09E-42  | 1.626887565 | 0.412 | 0.028 | 2.37E-38  | PLAT     | 25 | Mixed cell |
| 1216 | 3.21E-61  | 1.605112487 | 0.794 | 0.074 | 6.99E-57  | ECSCR.1  | 25 | Mixed cell |
| 1217 | 1.06E-72  | 1.580109002 | 0.824 | 0.067 | 2.31E-68  | CALD1    | 25 | Mixed cell |
| 1218 | 6.72E-40  | 1.577995457 | 0.882 | 0.133 | 1.47E-35  | CALCRL   | 25 | Mixed cell |
| 1219 | 1.77E-32  | 1.569294681 | 0.735 | 0.128 | 3.86E-28  | SHC1     | 25 | Mixed cell |
| 1220 | 1.95E-142 | 1.559235863 | 0.853 | 0.036 | 4.25E-138 | PROCR    | 25 | Mixed cell |
| 1221 | 2.46E-24  | 1.550055376 | 0.882 | 0.223 | 5.35E-20  | ID1      | 25 | Mixed cell |
| 1222 | 2.91E-77  | 1.530742681 | 0.882 | 0.071 | 6.35E-73  | COX7A1   | 25 | Mixed cell |
| 1223 | 2.16E-31  | 1.508415497 | 0.794 | 0.137 | 4.71E-27  | THBD     | 25 | Mixed cell |
| 1224 | 6.89E-23  | 1.500862492 | 0.882 | 0.261 | 1.50E-18  | CD59     | 25 | Mixed cell |
| 1225 | 1.77E-301 | 1.500072129 | 0.618 | 0.008 | 3.86E-297 | ABI3BP   | 25 | Mixed cell |
| 1226 | 3.28E-35  | 1.490124882 | 0.647 | 0.083 | 7.16E-31  | NRP2     | 25 | Mixed cell |
| 1227 | 1.43E-16  | 1.466404901 | 1     | 0.84  | 3.12E-12  | VIM      | 25 | Mixed cell |
| 1228 | 1.94E-46  | 1.465657251 | 0.794 | 0.093 | 4.22E-42  | NUPR1    | 25 | Mixed cell |
| 1229 | 2.99E-33  | 1.465294357 | 0.912 | 0.17  | 6.52E-29  | CD9      | 25 | Mixed cell |
| 1230 | 1.19E-35  | 1.461434147 | 0.824 | 0.126 | 2.59E-31  | PLPP1    | 25 | Mixed cell |
| 1231 | 1.03E-56  | 1.419798106 | 0.706 | 0.061 | 2.25E-52  | NR2F1    | 25 | Mixed cell |
| 1232 | 5.45E-24  | 1.402301526 | 0.912 | 0.272 | 1.19E-19  | CD151    | 25 | Mixed cell |
| 1233 | 6.87E-47  | 1.392216616 | 0.647 | 0.062 | 1.50E-42  | PLSCR4   | 25 | Mixed cell |
| 1234 | 1.42E-35  | 1.390466212 | 0.765 | 0.112 | 3.09E-31  | CAV1     | 25 | Mixed cell |
| 1235 | 4.58E-142 | 1.380405138 | 0.618 | 0.018 | 9.98E-138 | RARRES2  | 25 | Mixed cell |
| 1236 | 7.01E-49  | 1.378998589 | 0.853 | 0.102 | 1.53E-44  | PTRF     | 25 | Mixed cell |
| 1237 | 3.02E-24  | 1.378197319 | 0.912 | 0.259 | 6.58E-20  | TGFBR2   | 25 | Mixed cell |

**Table 3. List of markers information for mononuclear phagocyte clusters, related to Figure 2.**

|    | p_val     | avg_logFC   | pct.1 | pct.2 | p_val_adj | gene     | cluster | cell_type |
|----|-----------|-------------|-------|-------|-----------|----------|---------|-----------|
| 1  | 0         | 2.417559111 | 0.964 | 0.185 | 0         | C1QC     | 1       | C1QC_KC   |
| 2  | 0         | 2.318395253 | 0.965 | 0.18  | 0         | C1QB     | 1       | C1QC_KC   |
| 3  | 0         | 2.283970776 | 0.813 | 0.107 | 0         | SLC40A1  | 1       | C1QC_KC   |
| 4  | 0         | 2.198496178 | 0.766 | 0.049 | 0         | SEPP1    | 1       | C1QC_KC   |
| 5  | 0         | 2.19335533  | 0.967 | 0.217 | 0         | C1QA     | 1       | C1QC_KC   |
| 6  | 0         | 1.955031671 | 0.65  | 0.066 | 0         | APOC1    | 1       | C1QC_KC   |
| 7  | 0         | 1.89287979  | 0.786 | 0.064 | 0         | LGMM     | 1       | C1QC_KC   |
| 8  | 0         | 1.81717709  | 0.807 | 0.098 | 0         | FOLR2    | 1       | C1QC_KC   |
| 9  | 3.04E-211 | 1.796815215 | 0.455 | 0.03  | 6.64E-207 | APOE     | 1       | C1QC_KC   |
| 10 | 0         | 1.632536636 | 0.92  | 0.464 | 0         | LIPA     | 1       | C1QC_KC   |
| 11 | 1.14E-93  | 1.42422339  | 0.426 | 0.136 | 2.49E-89  | RNASE1   | 1       | C1QC_KC   |
| 12 | 1.87E-159 | 1.421917259 | 0.593 | 0.211 | 4.08E-155 | MARCO    | 1       | C1QC_KC   |
| 13 | 0         | 1.413525674 | 0.887 | 0.253 | 0         | HLA-DQA1 | 1       | C1QC_KC   |
| 14 | 0         | 1.407972391 | 0.891 | 0.346 | 0         | MS4A4A   | 1       | C1QC_KC   |
| 15 | 0         | 1.353316623 | 0.985 | 0.65  | 0         | HLA-DRB5 | 1       | C1QC_KC   |
| 16 | 5.07E-96  | 1.339987528 | 0.53  | 0.214 | 1.10E-91  | CCL4L2   | 1       | C1QC_KC   |
| 17 | 1.27E-193 | 1.302820953 | 0.627 | 0.174 | 2.76E-189 | PKD4     | 1       | C1QC_KC   |
| 18 | 2.21E-283 | 1.259259798 | 0.613 | 0.064 | 4.81E-279 | GNPMB    | 1       | C1QC_KC   |
| 19 | 0         | 1.241606923 | 0.965 | 0.575 | 0         | HLA-DPB1 | 1       | C1QC_KC   |
| 20 | 0         | 1.230180393 | 0.684 | 0.053 | 0         | MRC1     | 1       | C1QC_KC   |
| 21 | 1.97E-294 | 1.220265063 | 0.828 | 0.251 | 4.29E-290 | VSIG4    | 1       | C1QC_KC   |
| 22 | 1.29E-305 | 1.213841752 | 0.921 | 0.481 | 2.82E-301 | MS4A7    | 1       | C1QC_KC   |
| 23 | 1.02E-160 | 1.179448797 | 0.869 | 0.522 | 2.23E-156 | HSPA1A   | 1       | C1QC_KC   |
| 24 | 1.05E-140 | 1.169028901 | 0.665 | 0.258 | 2.29E-136 | HSPB1    | 1       | C1QC_KC   |
| 25 | 0         | 1.166824563 | 0.975 | 0.636 | 0         | HLA-DPA1 | 1       | C1QC_KC   |
| 26 | 7.28E-253 | 1.122432059 | 0.773 | 0.257 | 1.59E-248 | CPM      | 1       | C1QC_KC   |
| 27 | 0         | 1.120004299 | 0.998 | 0.96  | 0         | CD74     | 1       | C1QC_KC   |
| 28 | 8.33E-275 | 1.063864181 | 0.89  | 0.32  | 1.82E-270 | FCGR3A   | 1       | C1QC_KC   |
| 29 | 2.79E-259 | 1.059173029 | 0.881 | 0.482 | 6.09E-255 | CREG1    | 1       | C1QC_KC   |
| 30 | 5.25E-174 | 1.056364715 | 0.456 | 0.06  | 1.15E-169 | RGS1     | 1       | C1QC_KC   |
| 31 | 6.37E-271 | 1.055207124 | 0.938 | 0.541 | 1.39E-266 | HLA-DQB1 | 1       | C1QC_KC   |
| 32 | 0         | 1.040685759 | 0.972 | 0.787 | 0         | MS4A6A   | 1       | C1QC_KC   |
| 33 | 6.15E-209 | 1.023843895 | 0.891 | 0.534 | 1.34E-204 | HMOX1    | 1       | C1QC_KC   |
| 34 | 6.00E-165 | 1.018235699 | 0.373 | 0.024 | 1.31E-160 | LYVE1    | 1       | C1QC_KC   |
| 35 | 1.37E-246 | 0.996157382 | 0.811 | 0.316 | 2.99E-242 | CSF1R    | 1       | C1QC_KC   |
| 36 | 2.36E-101 | 0.995964627 | 0.58  | 0.244 | 5.15E-97  | HSPH1    | 1       | C1QC_KC   |
| 37 | 1.56E-305 | 0.994104141 | 0.991 | 0.872 | 3.41E-301 | HLA-DRA  | 1       | C1QC_KC   |
| 38 | 0         | 0.972083211 | 0.97  | 0.824 | 0         | CD68     | 1       | C1QC_KC   |
| 39 | 1.58E-109 | 0.969568459 | 0.821 | 0.523 | 3.44E-105 | JUN      | 1       | C1QC_KC   |
| 40 | 3.72E-223 | 0.954356708 | 0.663 | 0.158 | 8.12E-219 | MAF      | 1       | C1QC_KC   |
| 41 | 5.35E-98  | 0.953717426 | 0.716 | 0.414 | 1.17E-93  | DNAJB1   | 1       | C1QC_KC   |
| 42 | 1.01E-240 | 0.943062078 | 0.93  | 0.692 | 2.20E-236 | FCGRT    | 1       | C1QC_KC   |
| 43 | 3.01E-155 | 0.93781981  | 0.444 | 0.073 | 6.57E-151 | TMIGD3   | 1       | C1QC_KC   |
| 44 | 6.97E-271 | 0.931026719 | 0.982 | 0.834 | 1.52E-266 | HLA-DRB1 | 1       | C1QC_KC   |
| 45 | 1.24E-74  | 0.914255102 | 0.627 | 0.35  | 2.70E-70  | CCL4     | 1       | C1QC_KC   |
| 46 | 2.25E-209 | 0.912675509 | 0.889 | 0.495 | 4.90E-205 | CTSC     | 1       | C1QC_KC   |
| 47 | 7.86E-252 | 0.91213726  | 0.96  | 0.832 | 1.71E-247 | CTSB     | 1       | C1QC_KC   |
| 48 | 5.95E-228 | 0.910911167 | 0.672 | 0.171 | 1.30E-223 | TSPAN4   | 1       | C1QC_KC   |
| 49 | 6.69E-188 | 0.89234887  | 0.706 | 0.261 | 1.46E-183 | MCOLN1   | 1       | C1QC_KC   |
| 50 | 1.62E-72  | 0.871113156 | 0.63  | 0.352 | 3.52E-68  | CCL3     | 1       | C1QC_KC   |
| 51 | 8.69E-118 | 0.866556789 | 0.701 | 0.32  | 1.90E-113 | HSPA1B   | 1       | C1QC_KC   |
| 52 | 2.28E-52  | 0.861087938 | 0.282 | 0.094 | 4.97E-48  | BAG3     | 1       | C1QC_KC   |
| 53 | 3.01E-204 | 0.857597072 | 0.574 | 0.106 | 6.57E-200 | GPR34    | 1       | C1QC_KC   |
| 54 | 2.47E-250 | 0.856989905 | 0.937 | 0.62  | 5.38E-246 | RNASET2  | 1       | C1QC_KC   |
| 55 | 3.58E-194 | 0.852027108 | 0.665 | 0.186 | 7.81E-190 | ABCA1    | 1       | C1QC_KC   |
| 56 | 2.80E-74  | 0.843258048 | 0.671 | 0.38  | 6.12E-70  | HSPD1    | 1       | C1QC_KC   |
| 57 | 0         | 0.838387737 | 0.983 | 0.85  | 0         | NPC2     | 1       | C1QC_KC   |
| 58 | 2.64E-207 | 0.833788475 | 0.797 | 0.298 | 5.75E-203 | FAM26F   | 1       | C1QC_KC   |
| 59 | 1.60E-102 | 0.832692108 | 0.929 | 0.754 | 3.49E-98  | HSP90AA1 | 1       | C1QC_KC   |
| 60 | 2.63E-127 | 0.826809644 | 0.396 | 0.069 | 5.74E-123 | ID3      | 1       | C1QC_KC   |
| 61 | 1.87E-199 | 0.815928824 | 0.595 | 0.123 | 4.08E-195 | DAB2     | 1       | C1QC_KC   |
| 62 | 1.91E-130 | 0.813244933 | 0.902 | 0.655 | 4.17E-126 | GADD45B  | 1       | C1QC_KC   |
| 63 | 1.41E-185 | 0.811278826 | 0.387 | 0.015 | 3.07E-181 | PLTP     | 1       | C1QC_KC   |
| 64 | 4.02E-197 | 0.793020227 | 0.87  | 0.473 | 8.76E-193 | HLA-DMA  | 1       | C1QC_KC   |
| 65 | 4.96E-153 | 0.777851914 | 0.628 | 0.209 | 1.08E-148 | SMPDL3A  | 1       | C1QC_KC   |
| 66 | 6.83E-153 | 0.769410195 | 0.81  | 0.384 | 1.49E-148 | CTSL     | 1       | C1QC_KC   |
| 67 | 1.83E-37  | 0.769167555 | 0.311 | 0.135 | 3.99E-33  | HSPA6    | 1       | C1QC_KC   |
| 68 | 4.48E-189 | 0.763366052 | 0.594 | 0.136 | 9.77E-185 | MERTK    | 1       | C1QC_KC   |
| 69 | 4.60E-180 | 0.756083601 | 0.622 | 0.167 | 1.00E-175 | MSR1     | 1       | C1QC_KC   |
| 70 | 3.10E-282 | 0.754144962 | 0.998 | 0.988 | 6.76E-278 | CST3     | 1       | C1QC_KC   |
| 71 | 7.50E-172 | 0.753175132 | 0.491 | 0.084 | 1.64E-167 | FUCA1    | 1       | C1QC_KC   |
| 72 | 1.41E-201 | 0.752910725 | 0.446 | 0.031 | 3.07E-197 | SDC3     | 1       | C1QC_KC   |
| 73 | 9.84E-66  | 0.751602582 | 0.223 | 0.038 | 2.15E-61  | SDS      | 1       | C1QC_KC   |

|     |           |             |       |       |           |          |   |         |
|-----|-----------|-------------|-------|-------|-----------|----------|---|---------|
| 74  | 9.99E-224 | 0.748405563 | 0.536 | 0.062 | 2.18E-219 | CLIC2    | 1 | C1QC_KC |
| 75  | 9.12E-110 | 0.737922527 | 0.664 | 0.309 | 1.99E-105 | FABP5    | 1 | C1QC_KC |
| 76  | 8.23E-33  | 0.728460579 | 0.444 | 0.262 | 1.80E-28  | CCL3L3   | 1 | C1QC_KC |
| 77  | 2.48E-180 | 0.724148516 | 0.474 | 0.065 | 5.41E-176 | ATP1B1   | 1 | C1QC_KC |
| 78  | 1.17E-38  | 0.720521322 | 0.135 | 0.023 | 2.55E-34  | CXCL10   | 1 | C1QC_KC |
| 79  | 9.60E-230 | 0.720483206 | 0.461 | 0.016 | 2.09E-225 | SLCO2B1  | 1 | C1QC_KC |
| 80  | 2.21E-147 | 0.71373069  | 0.671 | 0.26  | 4.82E-143 | IL18     | 1 | C1QC_KC |
| 81  | 5.25E-300 | 0.706007713 | 0.999 | 0.999 | 1.14E-295 | FTL      | 1 | C1QC_KC |
| 82  | 1.64E-155 | 0.69849957  | 0.341 | 0.016 | 3.59E-151 | SPIC     | 1 | C1QC_KC |
| 83  | 7.05E-78  | 0.692463434 | 0.722 | 0.412 | 1.54E-73  | HSPE1    | 1 | C1QC_KC |
| 84  | 3.18E-153 | 0.679413496 | 0.591 | 0.167 | 6.93E-149 | SLC1A3   | 1 | C1QC_KC |
| 85  | 2.36E-183 | 0.676894414 | 0.967 | 0.848 | 5.15E-179 | CD163    | 1 | C1QC_KC |
| 86  | 7.47E-33  | 0.673854569 | 0.703 | 0.549 | 1.63E-28  | HSPA5    | 1 | C1QC_KC |
| 87  | 2.59E-170 | 0.671002194 | 0.495 | 0.081 | 5.64E-166 | EBI3     | 1 | C1QC_KC |
| 88  | 4.39E-220 | 0.670440399 | 0.979 | 0.893 | 9.57E-216 | ITM2B    | 1 | C1QC_KC |
| 89  | 1.45E-169 | 0.668396828 | 0.468 | 0.07  | 3.15E-165 | NR1H3    | 1 | C1QC_KC |
| 90  | 1.44E-68  | 0.655234184 | 0.715 | 0.447 | 3.14E-64  | SGK1     | 1 | C1QC_KC |
| 91  | 5.41E-156 | 0.651442655 | 0.349 | 0.019 | 1.18E-151 | LILRB5   | 1 | C1QC_KC |
| 92  | 1.12E-113 | 0.649660437 | 0.48  | 0.14  | 2.45E-109 | GLO1     | 1 | C1QC_KC |
| 93  | 1.26E-147 | 0.649356914 | 0.31  | 0.008 | 2.75E-143 | CXCL12   | 1 | C1QC_KC |
| 94  | 1.82E-185 | 0.64060553  | 0.392 | 0.016 | 3.96E-181 | NRP1     | 1 | C1QC_KC |
| 95  | 1.80E-193 | 0.633195593 | 0.416 | 0.022 | 3.92E-189 | TMEM37   | 1 | C1QC_KC |
| 96  | 1.93E-57  | 0.63124381  | 0.125 | 0.002 | 4.20E-53  | CD5L     | 1 | C1QC_KC |
| 97  | 5.00E-171 | 0.630652674 | 0.382 | 0.021 | 1.09E-166 | SIGLEC1  | 1 | C1QC_KC |
| 98  | 1.33E-140 | 0.624523208 | 0.367 | 0.04  | 2.90E-136 | ARL4C    | 1 | C1QC_KC |
| 99  | 1.36E-152 | 0.622479267 | 0.528 | 0.122 | 2.96E-148 | FRMD4B   | 1 | C1QC_KC |
| 100 | 1.45E-138 | 0.622360115 | 0.511 | 0.128 | 3.16E-134 | CD84     | 1 | C1QC_KC |
| 101 | 1.06E-143 | 0.619313684 | 0.783 | 0.371 | 2.31E-139 | CXCL16   | 1 | C1QC_KC |
| 102 | 1.98E-181 | 0.614302772 | 0.945 | 0.784 | 4.32E-177 | HLA-E    | 1 | C1QC_KC |
| 103 | 1.62E-133 | 0.610904396 | 0.489 | 0.115 | 3.53E-129 | CD81     | 1 | C1QC_KC |
| 104 | 2.08E-104 | 0.607103497 | 0.792 | 0.505 | 4.54E-100 | CECR1    | 1 | C1QC_KC |
| 105 | 1.76E-130 | 0.606388139 | 0.635 | 0.241 | 3.83E-126 | SCARB2   | 1 | C1QC_KC |
| 106 | 6.12E-87  | 0.602753903 | 0.843 | 0.584 | 1.33E-82  | HSP90B1  | 1 | C1QC_KC |
| 107 | 3.06E-39  | 0.602635604 | 0.542 | 0.332 | 6.66E-35  | ICAM1    | 1 | C1QC_KC |
| 108 | 5.34E-55  | 0.600568499 | 0.214 | 0.045 | 1.16E-50  | DNAJA4   | 1 | C1QC_KC |
| 109 | 2.54E-151 | 0.598857805 | 0.375 | 0.035 | 5.53E-147 | CD72     | 1 | C1QC_KC |
| 110 | 1.54E-116 | 0.597023836 | 0.637 | 0.274 | 3.35E-112 | HLA-DMB  | 1 | C1QC_KC |
| 111 | 1.48E-91  | 0.593928109 | 0.794 | 0.52  | 3.22E-87  | IGSF6    | 1 | C1QC_KC |
| 112 | 7.95E-82  | 0.591713536 | 0.783 | 0.51  | 1.73E-77  | NINJ1    | 1 | C1QC_KC |
| 113 | 2.72E-145 | 0.591004641 | 0.378 | 0.04  | 5.93E-141 | CD59     | 1 | C1QC_KC |
| 114 | 3.18E-123 | 0.589983153 | 0.583 | 0.207 | 6.94E-119 | ADAP2    | 1 | C1QC_KC |
| 115 | 2.62E-108 | 0.579987347 | 0.928 | 0.753 | 5.70E-104 | GLUL     | 1 | C1QC_KC |
| 116 | 1.01E-134 | 0.575775801 | 0.299 | 0.012 | 2.20E-130 | A2M      | 1 | C1QC_KC |
| 117 | 7.66E-147 | 0.574225659 | 0.458 | 0.083 | 1.67E-142 | FMNL2    | 1 | C1QC_KC |
| 118 | 6.80E-95  | 0.572525763 | 0.701 | 0.351 | 1.48E-90  | CLEC2B   | 1 | C1QC_KC |
| 119 | 4.64E-50  | 0.569483896 | 0.295 | 0.102 | 1.01E-45  | MMP19    | 1 | C1QC_KC |
| 120 | 1.51E-126 | 0.568003565 | 0.608 | 0.221 | 3.29E-122 | TECR     | 1 | C1QC_KC |
| 121 | 2.62E-149 | 0.567012932 | 0.357 | 0.028 | 5.70E-145 | DST      | 1 | C1QC_KC |
| 122 | 2.21E-92  | 0.561074478 | 0.892 | 0.665 | 4.83E-88  | HSPA8    | 1 | C1QC_KC |
| 123 | 1.21E-119 | 0.558798008 | 0.899 | 0.692 | 2.63E-115 | BLVRB    | 1 | C1QC_KC |
| 124 | 3.47E-130 | 0.557936872 | 0.319 | 0.025 | 7.56E-126 | OTOA     | 1 | C1QC_KC |
| 125 | 2.89E-72  | 0.556839847 | 0.878 | 0.655 | 6.30E-68  | HSP90AB1 | 1 | C1QC_KC |
| 126 | 7.58E-113 | 0.556261467 | 0.656 | 0.276 | 1.65E-108 | STOM     | 1 | C1QC_KC |
| 127 | 1.33E-105 | 0.550180457 | 0.541 | 0.2   | 2.91E-101 | HEXA     | 1 | C1QC_KC |
| 128 | 2.61E-114 | 0.54892533  | 0.682 | 0.307 | 5.69E-110 | SNX5     | 1 | C1QC_KC |
| 129 | 1.29E-113 | 0.544963094 | 0.602 | 0.229 | 2.82E-109 | CD4      | 1 | C1QC_KC |
| 130 | 2.25E-87  | 0.542269209 | 0.714 | 0.396 | 4.92E-83  | PLD3     | 1 | C1QC_KC |
| 131 | 1.74E-111 | 0.541607646 | 0.921 | 0.747 | 3.80E-107 | ASAH1    | 1 | C1QC_KC |
| 132 | 1.90E-122 | 0.538166432 | 0.427 | 0.09  | 4.15E-118 | AKR1B1   | 1 | C1QC_KC |
| 133 | 1.96E-70  | 0.537255727 | 0.718 | 0.447 | 4.28E-66  | RBP7     | 1 | C1QC_KC |
| 134 | 5.39E-125 | 0.527248299 | 0.961 | 0.924 | 1.17E-120 | PSAP     | 1 | C1QC_KC |
| 135 | 4.97E-35  | 0.524264891 | 0.301 | 0.133 | 1.08E-30  | ZFAND2A  | 1 | C1QC_KC |
| 136 | 2.44E-96  | 0.523754244 | 0.786 | 0.5   | 5.32E-92  | TPP1     | 1 | C1QC_KC |
| 137 | 3.68E-80  | 0.520967936 | 0.836 | 0.559 | 8.03E-76  | UBB      | 1 | C1QC_KC |
| 138 | 6.13E-75  | 0.519142203 | 0.745 | 0.486 | 1.34E-70  | CPVL     | 1 | C1QC_KC |
| 139 | 4.16E-99  | 0.516560848 | 0.981 | 0.883 | 9.07E-95  | MT-ATP8  | 1 | C1QC_KC |
| 140 | 5.35E-123 | 0.516243256 | 0.351 | 0.049 | 1.17E-118 | GFRA2    | 1 | C1QC_KC |
| 141 | 7.48E-88  | 0.515951767 | 0.618 | 0.296 | 1.63E-83  | TCN2     | 1 | C1QC_KC |
| 142 | 4.24E-116 | 0.514636467 | 0.991 | 0.952 | 9.24E-112 | MT-ND4L  | 1 | C1QC_KC |
| 143 | 6.21E-97  | 0.513726654 | 0.457 | 0.141 | 1.35E-92  | ACP5     | 1 | C1QC_KC |
| 144 | 6.14E-75  | 0.510968247 | 0.427 | 0.156 | 1.34E-70  | P2RY13   | 1 | C1QC_KC |
| 145 | 6.31E-127 | 0.50921368  | 0.31  | 0.025 | 1.38E-122 | ANKH     | 1 | C1QC_KC |
| 146 | 1.05E-46  | 0.507443539 | 0.387 | 0.178 | 2.29E-42  | PAPSS2   | 1 | C1QC_KC |
| 147 | 1.09E-64  | 0.502395291 | 0.747 | 0.46  | 2.37E-60  | ID2      | 1 | C1QC_KC |
| 148 | 8.92E-110 | 0.501178394 | 0.536 | 0.181 | 1.95E-105 | PEBP1    | 1 | C1QC_KC |

|     |           |             |       |       |           |          |   |         |
|-----|-----------|-------------|-------|-------|-----------|----------|---|---------|
| 149 | 3.56E-85  | 0.499195982 | 0.483 | 0.181 | 7.76E-81  | DNASE2   | 1 | C1QC_KC |
| 150 | 3.67E-70  | 0.497527327 | 0.844 | 0.606 | 8.01E-66  | FGL2     | 1 | C1QC_KC |
| 151 | 2.14E-107 | 0.496505662 | 0.37  | 0.072 | 4.67E-103 | WWP1     | 1 | C1QC_KC |
| 152 | 2.41E-94  | 0.490430862 | 0.926 | 0.788 | 5.26E-90  | CD63     | 1 | C1QC_KC |
| 153 | 6.03E-109 | 0.48978306  | 0.442 | 0.115 | 1.31E-104 | GPR137B  | 1 | C1QC_KC |
| 154 | 1.28E-80  | 0.486772378 | 0.673 | 0.357 | 2.80E-76  | PRNP     | 1 | C1QC_KC |
| 155 | 5.35E-22  | 0.485692649 | 0.426 | 0.274 | 1.17E-17  | EGR1     | 1 | C1QC_KC |
| 156 | 1.03E-37  | 0.484589194 | 0.603 | 0.396 | 2.24E-33  | CHMP1B   | 1 | C1QC_KC |
| 157 | 3.00E-64  | 0.482861803 | 0.875 | 0.689 | 6.53E-60  | WSB1     | 1 | C1QC_KC |
| 158 | 1.39E-79  | 0.47986495  | 0.901 | 0.76  | 3.03E-75  | GRN      | 1 | C1QC_KC |
| 159 | 7.01E-140 | 0.478314277 | 0.283 | 0.003 | 1.53E-135 | AXL      | 1 | C1QC_KC |
| 160 | 1.19E-125 | 0.476576957 | 0.364 | 0.05  | 2.60E-121 | CD38     | 1 | C1QC_KC |
| 161 | 1.26E-116 | 0.475438853 | 0.344 | 0.049 | 2.75E-112 | ABCC5    | 1 | C1QC_KC |
| 162 | 5.74E-104 | 0.474468484 | 0.484 | 0.152 | 1.25E-99  | CRYL1    | 1 | C1QC_KC |
| 163 | 7.60E-27  | 0.474375496 | 0.188 | 0.071 | 1.66E-22  | C15orf48 | 1 | C1QC_KC |
| 164 | 7.38E-73  | 0.473505369 | 0.503 | 0.21  | 1.61E-68  | CACYBP   | 1 | C1QC_KC |
| 165 | 1.94E-89  | 0.472715244 | 0.698 | 0.361 | 4.22E-85  | DRAM2    | 1 | C1QC_KC |
| 166 | 1.14E-95  | 0.471503615 | 0.9   | 0.739 | 2.49E-91  | HCLS1    | 1 | C1QC_KC |
| 167 | 1.18E-111 | 0.471275751 | 0.263 | 0.015 | 2.57E-107 | PMP22    | 1 | C1QC_KC |
| 168 | 3.42E-95  | 0.470827632 | 0.395 | 0.103 | 7.47E-91  | ACP2     | 1 | C1QC_KC |
| 169 | 1.15E-122 | 0.469616881 | 0.966 | 0.893 | 2.50E-118 | HLA-A    | 1 | C1QC_KC |
| 170 | 2.76E-121 | 0.467156679 | 0.335 | 0.04  | 6.01E-117 | EPB41L2  | 1 | C1QC_KC |
| 171 | 6.95E-90  | 0.467065961 | 0.857 | 0.623 | 1.52E-85  | MFSD1    | 1 | C1QC_KC |
| 172 | 1.05E-129 | 0.466976782 | 0.283 | 0.01  | 2.28E-125 | FRMD4A   | 1 | C1QC_KC |
| 173 | 1.12E-84  | 0.464260354 | 0.665 | 0.343 | 2.44E-80  | GAA      | 1 | C1QC_KC |
| 174 | 4.29E-61  | 0.46223095  | 0.892 | 0.681 | 9.36E-57  | RHOB     | 1 | C1QC_KC |
| 175 | 1.66E-83  | 0.461897274 | 0.594 | 0.281 | 3.61E-79  | CORO1B   | 1 | C1QC_KC |
| 176 | 7.18E-84  | 0.461593709 | 0.514 | 0.204 | 1.57E-79  | IDH1     | 1 | C1QC_KC |
| 177 | 8.59E-78  | 0.461433519 | 0.734 | 0.442 | 1.87E-73  | SNX6     | 1 | C1QC_KC |
| 178 | 1.10E-96  | 0.459869202 | 0.453 | 0.131 | 2.39E-92  | RGL1     | 1 | C1QC_KC |
| 179 | 4.14E-79  | 0.4572614   | 0.679 | 0.365 | 9.02E-75  | LAMP1    | 1 | C1QC_KC |
| 180 | 1.60E-84  | 0.453137558 | 0.828 | 0.541 | 3.49E-80  | LY96     | 1 | C1QC_KC |
| 181 | 2.08E-76  | 0.451644993 | 0.531 | 0.229 | 4.54E-72  | SIGLEC10 | 1 | C1QC_KC |
| 182 | 5.25E-77  | 0.447649736 | 0.593 | 0.282 | 1.14E-72  | RASSF4   | 1 | C1QC_KC |
| 183 | 1.40E-71  | 0.446772952 | 0.365 | 0.113 | 3.06E-67  | ARRDC3   | 1 | C1QC_KC |
| 184 | 6.34E-94  | 0.446589557 | 0.45  | 0.136 | 1.38E-89  | EVL      | 1 | C1QC_KC |
| 185 | 6.11E-91  | 0.4439465   | 0.22  | 0.013 | 1.33E-86  | ITLN1    | 1 | C1QC_KC |
| 186 | 6.07E-53  | 0.440447115 | 0.871 | 0.684 | 1.32E-48  | ZFP36L1  | 1 | C1QC_KC |
| 187 | 2.30E-109 | 0.43893345  | 0.277 | 0.023 | 5.02E-105 | C2       | 1 | C1QC_KC |
| 188 | 1.70E-62  | 0.437100063 | 0.779 | 0.518 | 3.70E-58  | RNASE6   | 1 | C1QC_KC |
| 189 | 1.96E-70  | 0.434363811 | 0.583 | 0.289 | 4.28E-66  | NPL      | 1 | C1QC_KC |
| 190 | 7.12E-56  | 0.432137738 | 0.829 | 0.613 | 1.55E-51  | HERPUD1  | 1 | C1QC_KC |
| 191 | 5.52E-84  | 0.429837834 | 0.424 | 0.134 | 1.20E-79  | AP2A2    | 1 | C1QC_KC |
| 192 | 1.15E-78  | 0.42768655  | 0.876 | 0.677 | 2.50E-74  | SARAF    | 1 | C1QC_KC |
| 193 | 3.11E-36  | 0.42757691  | 0.412 | 0.218 | 6.78E-32  | GLA      | 1 | C1QC_KC |
| 194 | 5.99E-80  | 0.425584981 | 0.588 | 0.268 | 1.31E-75  | PRCP     | 1 | C1QC_KC |
| 195 | 3.38E-113 | 0.423336023 | 0.265 | 0.015 | 7.37E-109 | FPR3     | 1 | C1QC_KC |
| 196 | 1.53E-34  | 0.422860387 | 0.5   | 0.3   | 3.33E-30  | EIF4A3   | 1 | C1QC_KC |
| 197 | 3.21E-29  | 0.422322718 | 0.673 | 0.505 | 7.01E-25  | CD83     | 1 | C1QC_KC |
| 198 | 9.42E-74  | 0.421874988 | 0.872 | 0.637 | 2.05E-69  | NPM1     | 1 | C1QC_KC |
| 199 | 6.31E-134 | 0.421843202 | 0.978 | 0.945 | 1.38E-129 | HLA-C    | 1 | C1QC_KC |
| 200 | 1.58E-71  | 0.416557751 | 0.662 | 0.361 | 3.44E-67  | DPP7     | 1 | C1QC_KC |
| 201 | 2.66E-41  | 0.41498191  | 0.791 | 0.608 | 5.81E-37  | KLF4     | 1 | C1QC_KC |
| 202 | 1.31E-52  | 0.414888898 | 0.33  | 0.119 | 2.85E-48  | ID1      | 1 | C1QC_KC |
| 203 | 9.61E-86  | 0.414723216 | 0.406 | 0.12  | 2.09E-81  | FCHO2    | 1 | C1QC_KC |
| 204 | 3.84E-95  | 0.414723147 | 0.339 | 0.07  | 8.37E-91  | SORBS3   | 1 | C1QC_KC |
| 205 | 2.56E-50  | 0.413616821 | 0.81  | 0.62  | 5.58E-46  | IFNGR1   | 1 | C1QC_KC |
| 206 | 4.05E-37  | 0.409217346 | 0.903 | 0.837 | 8.84E-33  | KLF6     | 1 | C1QC_KC |
| 207 | 6.59E-33  | 0.409107303 | 0.269 | 0.114 | 1.44E-28  | TWISTNB  | 1 | C1QC_KC |
| 208 | 1.34E-70  | 0.40439635  | 0.718 | 0.418 | 2.93E-66  | TMEM123  | 1 | C1QC_KC |
| 209 | 5.51E-96  | 0.403919271 | 0.288 | 0.039 | 1.20E-91  | ADORA3   | 1 | C1QC_KC |
| 210 | 1.01E-46  | 0.402234664 | 0.103 | 0.002 | 2.19E-42  | VCAM1    | 1 | C1QC_KC |
| 211 | 1.62E-69  | 0.400757596 | 0.502 | 0.218 | 3.52E-65  | CISD2    | 1 | C1QC_KC |
| 212 | 4.10E-81  | 0.39969528  | 0.435 | 0.146 | 8.94E-77  | SIGLEC7  | 1 | C1QC_KC |
| 213 | 2.97E-75  | 0.398516587 | 0.417 | 0.145 | 6.48E-71  | DNPH1    | 1 | C1QC_KC |
| 214 | 2.25E-22  | 0.398324393 | 0.588 | 0.426 | 4.90E-18  | CITED2   | 1 | C1QC_KC |
| 215 | 1.12E-68  | 0.393857015 | 0.476 | 0.192 | 2.44E-64  | DAPK1    | 1 | C1QC_KC |
| 216 | 1.11E-48  | 0.392520293 | 0.248 | 0.072 | 2.42E-44  | DNAJB4   | 1 | C1QC_KC |
| 217 | 3.26E-97  | 0.391796432 | 0.246 | 0.02  | 7.11E-93  | ETV5     | 1 | C1QC_KC |
| 218 | 1.12E-82  | 0.391184291 | 0.996 | 0.989 | 2.44E-78  | MT-ATP6  | 1 | C1QC_KC |
| 219 | 4.70E-96  | 0.391157749 | 0.999 | 0.982 | 1.02E-91  | SAT1     | 1 | C1QC_KC |
| 220 | 1.96E-65  | 0.390552654 | 0.573 | 0.29  | 4.28E-61  | GUSB     | 1 | C1QC_KC |
| 221 | 5.17E-87  | 0.38999079  | 0.274 | 0.041 | 1.13E-82  | C1orf54  | 1 | C1QC_KC |
| 222 | 2.13E-54  | 0.387036078 | 0.785 | 0.571 | 4.64E-50  | CD164    | 1 | C1QC_KC |
| 223 | 1.29E-51  | 0.385621885 | 0.775 | 0.518 | 2.81E-47  | CALR     | 1 | C1QC_KC |

|     |           |             |       |       |           |          |   |         |
|-----|-----------|-------------|-------|-------|-----------|----------|---|---------|
| 224 | 4.41E-63  | 0.385168851 | 0.749 | 0.461 | 9.61E-59  | CHCHD10  | 1 | C1QC_KC |
| 225 | 3.86E-63  | 0.383919349 | 0.678 | 0.392 | 8.42E-59  | ST13     | 1 | C1QC_KC |
| 226 | 4.39E-67  | 0.381325966 | 0.629 | 0.323 | 9.58E-63  | MTSS1    | 1 | C1QC_KC |
| 227 | 1.30E-31  | 0.379294551 | 0.722 | 0.513 | 2.83E-27  | MT-ND6   | 1 | C1QC_KC |
| 228 | 2.05E-84  | 0.379152247 | 0.325 | 0.071 | 4.48E-80  | BEX4     | 1 | C1QC_KC |
| 229 | 6.32E-105 | 0.376188941 | 0.283 | 0.029 | 1.38E-100 | ABCG1    | 1 | C1QC_KC |
| 230 | 7.76E-91  | 0.374292126 | 0.273 | 0.037 | 1.69E-86  | MMD      | 1 | C1QC_KC |
| 231 | 2.17E-56  | 0.372626287 | 0.541 | 0.266 | 4.74E-52  | FGD2     | 1 | C1QC_KC |
| 232 | 8.22E-37  | 0.370982867 | 0.531 | 0.313 | 1.79E-32  | PELI1    | 1 | C1QC_KC |
| 233 | 2.61E-68  | 0.370945677 | 0.549 | 0.252 | 5.69E-64  | DDAH2    | 1 | C1QC_KC |
| 234 | 3.41E-65  | 0.364605748 | 0.431 | 0.167 | 7.44E-61  | GLMP     | 1 | C1QC_KC |
| 235 | 2.17E-76  | 0.363190019 | 0.276 | 0.053 | 4.73E-72  | MS4A4E   | 1 | C1QC_KC |
| 236 | 6.92E-61  | 0.362984998 | 0.557 | 0.27  | 1.51E-56  | CD300A   | 1 | C1QC_KC |
| 237 | 5.80E-86  | 0.362884344 | 0.247 | 0.029 | 1.26E-81  | SPATS2L  | 1 | C1QC_KC |
| 238 | 1.44E-60  | 0.361756351 | 0.329 | 0.105 | 3.13E-56  | P4HA1    | 1 | C1QC_KC |
| 239 | 1.61E-71  | 0.361448594 | 0.359 | 0.106 | 3.51E-67  | SNX9     | 1 | C1QC_KC |
| 240 | 1.74E-55  | 0.359859199 | 0.616 | 0.344 | 3.78E-51  | PABPC4   | 1 | C1QC_KC |
| 241 | 4.26E-56  | 0.359408697 | 0.633 | 0.367 | 9.30E-52  | MAN2B1   | 1 | C1QC_KC |
| 242 | 1.76E-92  | 0.359271116 | 0.238 | 0.02  | 3.83E-88  | SLC46A1  | 1 | C1QC_KC |
| 243 | 6.65E-68  | 0.35873544  | 0.185 | 0.017 | 1.45E-63  | CETP     | 1 | C1QC_KC |
| 244 | 4.22E-67  | 0.357545836 | 0.354 | 0.112 | 9.21E-63  | CREBL2   | 1 | C1QC_KC |
| 245 | 4.76E-47  | 0.355824659 | 0.617 | 0.372 | 1.04E-42  | PDIA6    | 1 | C1QC_KC |
| 246 | 1.40E-56  | 0.354879977 | 0.715 | 0.441 | 3.05E-52  | NDFIP1   | 1 | C1QC_KC |
| 247 | 6.72E-48  | 0.350812624 | 0.603 | 0.341 | 1.47E-43  | SOD1     | 1 | C1QC_KC |
| 248 | 1.22E-45  | 0.350388947 | 0.64  | 0.383 | 2.67E-41  | NABP1    | 1 | C1QC_KC |
| 249 | 2.09E-36  | 0.34988232  | 0.75  | 0.562 | 4.56E-32  | TXNIP    | 1 | C1QC_KC |
| 250 | 5.37E-64  | 0.349625971 | 0.223 | 0.039 | 1.17E-59  | FILIP1L  | 1 | C1QC_KC |
| 251 | 2.35E-79  | 0.34765564  | 0.237 | 0.03  | 5.12E-75  | TNFRSF21 | 1 | C1QC_KC |
| 252 | 3.90E-99  | 0.347077614 | 0.236 | 0.013 | 8.50E-95  | GATM     | 1 | C1QC_KC |
| 253 | 1.13E-100 | 0.344477008 | 0.223 | 0.007 | 2.47E-96  | DHRS3    | 1 | C1QC_KC |
| 254 | 1.17E-30  | 0.341483605 | 0.769 | 0.579 | 2.55E-26  | SQSTM1   | 1 | C1QC_KC |
| 255 | 2.43E-76  | 0.341130539 | 0.294 | 0.061 | 5.30E-72  | NMRK1    | 1 | C1QC_KC |
| 256 | 5.08E-54  | 0.339928411 | 0.541 | 0.278 | 1.11E-49  | RB1      | 1 | C1QC_KC |
| 257 | 2.50E-71  | 0.339504591 | 0.295 | 0.069 | 5.45E-67  | AIG1     | 1 | C1QC_KC |
| 258 | 4.07E-51  | 0.33767136  | 0.422 | 0.186 | 8.88E-47  | TCF7L2   | 1 | C1QC_KC |
| 259 | 7.64E-59  | 0.337034247 | 0.352 | 0.123 | 1.67E-54  | SESN1    | 1 | C1QC_KC |
| 260 | 3.76E-46  | 0.336389327 | 0.909 | 0.747 | 8.19E-42  | MAFB     | 1 | C1QC_KC |
| 261 | 2.98E-33  | 0.33171708  | 0.412 | 0.22  | 6.50E-29  | CREM     | 1 | C1QC_KC |
| 262 | 7.29E-61  | 0.331708461 | 0.319 | 0.097 | 1.59E-56  | PTMS     | 1 | C1QC_KC |
| 263 | 2.10E-23  | 0.331045792 | 0.248 | 0.123 | 4.59E-19  | FKBP4    | 1 | C1QC_KC |
| 264 | 5.59E-46  | 0.33022974  | 0.791 | 0.574 | 1.22E-41  | TMEM59   | 1 | C1QC_KC |
| 265 | 1.70E-49  | 0.329022296 | 0.712 | 0.461 | 3.71E-45  | ARL6IP1  | 1 | C1QC_KC |
| 266 | 1.47E-44  | 0.328818722 | 0.75  | 0.506 | 3.21E-40  | LCP2     | 1 | C1QC_KC |
| 267 | 4.27E-62  | 0.328715905 | 0.379 | 0.133 | 9.32E-58  | TMC6     | 1 | C1QC_KC |
| 268 | 7.46E-79  | 0.328448291 | 0.267 | 0.045 | 1.63E-74  | OLFML2B  | 1 | C1QC_KC |
| 269 | 4.57E-89  | 0.32788709  | 0.215 | 0.013 | 9.96E-85  | SLC7A8   | 1 | C1QC_KC |
| 270 | 9.13E-63  | 0.326086666 | 0.292 | 0.078 | 1.99E-58  | GCLC     | 1 | C1QC_KC |
| 271 | 2.75E-34  | 0.324882854 | 0.641 | 0.424 | 6.00E-30  | CTSZ     | 1 | C1QC_KC |
| 272 | 1.11E-20  | 0.324316119 | 0.502 | 0.352 | 2.42E-16  | ATF3     | 1 | C1QC_KC |
| 273 | 6.09E-53  | 0.323982904 | 0.215 | 0.047 | 1.33E-48  | HES1     | 1 | C1QC_KC |
| 274 | 7.14E-46  | 0.321255391 | 0.226 | 0.064 | 1.56E-41  | KMO      | 1 | C1QC_KC |
| 275 | 1.23E-58  | 0.321117223 | 0.564 | 0.277 | 2.69E-54  | TMEM14C  | 1 | C1QC_KC |
| 276 | 3.23E-30  | 0.32101239  | 0.938 | 0.866 | 7.04E-26  | UBC      | 1 | C1QC_KC |
| 277 | 6.33E-48  | 0.32099954  | 0.887 | 0.692 | 1.38E-43  | VAMP8    | 1 | C1QC_KC |
| 278 | 1.33E-51  | 0.32094822  | 0.397 | 0.167 | 2.91E-47  | GNPDA1   | 1 | C1QC_KC |
| 279 | 1.99E-44  | 0.319949529 | 0.48  | 0.243 | 4.34E-40  | BHLHE40  | 1 | C1QC_KC |
| 280 | 1.45E-69  | 0.318119625 | 0.255 | 0.05  | 3.17E-65  | CMKLR1   | 1 | C1QC_KC |
| 281 | 4.48E-55  | 0.316960207 | 0.997 | 0.991 | 9.76E-51  | MT-ND3   | 1 | C1QC_KC |
| 282 | 8.36E-33  | 0.315871242 | 0.393 | 0.209 | 1.82E-28  | DDIT3    | 1 | C1QC_KC |
| 283 | 6.81E-63  | 0.315569888 | 0.305 | 0.085 | 1.49E-58  | PRKACB   | 1 | C1QC_KC |
| 284 | 1.16E-53  | 0.314482642 | 0.344 | 0.127 | 2.52E-49  | PHACTR2  | 1 | C1QC_KC |
| 285 | 2.23E-54  | 0.314264365 | 0.476 | 0.216 | 4.86E-50  | CNDP2    | 1 | C1QC_KC |
| 286 | 3.78E-105 | 0.31355882  | 0.999 | 1     | 8.25E-101 | B2M      | 1 | C1QC_KC |
| 287 | 4.59E-81  | 0.313211808 | 0.192 | 0.009 | 1.00E-76  | SUCNR1   | 1 | C1QC_KC |
| 288 | 2.55E-48  | 0.312708987 | 0.558 | 0.301 | 5.55E-44  | AKR1A1   | 1 | C1QC_KC |
| 289 | 5.63E-49  | 0.312187023 | 0.456 | 0.216 | 1.23E-44  | ABI3     | 1 | C1QC_KC |
| 290 | 1.01E-67  | 0.312138212 | 0.998 | 0.999 | 2.21E-63  | MT-CO2   | 1 | C1QC_KC |
| 291 | 1.48E-51  | 0.311973386 | 0.62  | 0.346 | 3.22E-47  | LAMP2    | 1 | C1QC_KC |
| 292 | 3.88E-36  | 0.31029874  | 0.984 | 0.938 | 8.47E-32  | MT-ND5   | 1 | C1QC_KC |
| 293 | 1.70E-21  | 0.309019382 | 0.793 | 0.708 | 3.71E-17  | CFD      | 1 | C1QC_KC |
| 294 | 7.48E-70  | 0.308227186 | 0.199 | 0.022 | 1.63E-65  | KCNMA1   | 1 | C1QC_KC |
| 295 | 1.80E-43  | 0.305188352 | 0.739 | 0.495 | 3.93E-39  | LGALS9   | 1 | C1QC_KC |
| 296 | 7.17E-34  | 0.304884952 | 0.93  | 0.867 | 1.56E-29  | CTSD     | 1 | C1QC_KC |
| 297 | 2.35E-29  | 0.304576539 | 0.166 | 0.052 | 5.11E-25  | EGR2     | 1 | C1QC_KC |
| 298 | 5.14E-40  | 0.302527612 | 0.767 | 0.535 | 1.12E-35  | TBXAS1   | 1 | C1QC_KC |

|     |          |             |       |       |          |               |   |         |
|-----|----------|-------------|-------|-------|----------|---------------|---|---------|
| 299 | 6.18E-56 | 0.302212254 | 0.319 | 0.105 | 1.35E-51 | TSPAN3        | 1 | C1QC_KC |
| 300 | 3.86E-43 | 0.30208809  | 0.534 | 0.295 | 8.41E-39 | GYPC          | 1 | C1QC_KC |
| 301 | 1.09E-58 | 0.302004626 | 0.999 | 0.999 | 2.39E-54 | MT-CO1        | 1 | C1QC_KC |
| 302 | 3.25E-70 | 0.300935223 | 0.226 | 0.034 | 7.09E-66 | PLA2G15       | 1 | C1QC_KC |
| 303 | 2.90E-68 | 0.30025911  | 0.317 | 0.085 | 6.33E-64 | CHID1         | 1 | C1QC_KC |
| 304 | 7.38E-42 | 0.299956557 | 0.528 | 0.297 | 1.61E-37 | AOAH          | 1 | C1QC_KC |
| 305 | 2.03E-44 | 0.299804635 | 0.542 | 0.297 | 4.43E-40 | SERPINB6      | 1 | C1QC_KC |
| 306 | 3.74E-38 | 0.298489315 | 0.642 | 0.403 | 8.16E-34 | EIF4A2        | 1 | C1QC_KC |
| 307 | 5.64E-41 | 0.297805922 | 0.514 | 0.283 | 1.23E-36 | CD86          | 1 | C1QC_KC |
| 308 | 3.76E-51 | 0.297191431 | 0.4   | 0.167 | 8.19E-47 | RENBP         | 1 | C1QC_KC |
| 309 | 1.88E-30 | 0.296896586 | 0.796 | 0.642 | 4.10E-26 | PRDX1         | 1 | C1QC_KC |
| 310 | 4.88E-56 | 0.296312617 | 0.277 | 0.079 | 1.06E-51 | ME1           | 1 | C1QC_KC |
| 311 | 9.03E-41 | 0.295165776 | 0.544 | 0.302 | 1.97E-36 | IRF8          | 1 | C1QC_KC |
| 312 | 1.34E-35 | 0.29513313  | 0.11  | 0.014 | 2.92E-31 | TREM2         | 1 | C1QC_KC |
| 313 | 2.72E-48 | 0.294968904 | 0.368 | 0.151 | 5.92E-44 | DEGS1         | 1 | C1QC_KC |
| 314 | 6.98E-30 | 0.294169597 | 0.425 | 0.239 | 1.52E-25 | ELL2          | 1 | C1QC_KC |
| 315 | 6.93E-67 | 0.294104474 | 0.245 | 0.048 | 1.51E-62 | SIGLEC11      | 1 | C1QC_KC |
| 316 | 8.86E-19 | 0.292917863 | 0.83  | 0.687 | 1.93E-14 | MT2A          | 1 | C1QC_KC |
| 317 | 2.49E-40 | 0.292510152 | 0.537 | 0.305 | 5.44E-36 | RPN2          | 1 | C1QC_KC |
| 318 | 1.48E-55 | 0.292284097 | 0.283 | 0.085 | 3.23E-51 | GIMAP5        | 1 | C1QC_KC |
| 319 | 1.63E-48 | 0.292134533 | 0.906 | 0.716 | 3.56E-44 | CD302         | 1 | C1QC_KC |
| 320 | 6.35E-37 | 0.292052374 | 0.621 | 0.397 | 1.39E-32 | NUCB1         | 1 | C1QC_KC |
| 321 | 7.58E-66 | 0.292050151 | 0.235 | 0.043 | 1.65E-61 | SHMT1         | 1 | C1QC_KC |
| 322 | 8.22E-47 | 0.291849215 | 0.305 | 0.112 | 1.79E-42 | CEPT1         | 1 | C1QC_KC |
| 323 | 1.85E-67 | 0.290302219 | 0.27  | 0.058 | 4.03E-63 | SLC46A3       | 1 | C1QC_KC |
| 324 | 1.53E-48 | 0.290258526 | 0.388 | 0.162 | 3.33E-44 | FUOM          | 1 | C1QC_KC |
| 325 | 1.20E-72 | 0.289295045 | 0.986 | 0.962 | 2.61E-68 | HLA-B         | 1 | C1QC_KC |
| 326 | 1.32E-41 | 0.289172315 | 0.709 | 0.485 | 2.89E-37 | RNF13         | 1 | C1QC_KC |
| 327 | 9.23E-32 | 0.288852077 | 0.774 | 0.563 | 2.01E-27 | PTGES3        | 1 | C1QC_KC |
| 328 | 4.20E-57 | 0.287879881 | 0.283 | 0.079 | 9.15E-53 | SLC37A2       | 1 | C1QC_KC |
| 329 | 1.55E-46 | 0.287658464 | 0.426 | 0.194 | 3.38E-42 | CYFIP1        | 1 | C1QC_KC |
| 330 | 8.07E-41 | 0.287164505 | 0.549 | 0.305 | 1.76E-36 | FNBP1         | 1 | C1QC_KC |
| 331 | 1.44E-66 | 0.286699048 | 0.248 | 0.048 | 3.14E-62 | AMDHD2        | 1 | C1QC_KC |
| 332 | 2.24E-17 | 0.285794389 | 0.251 | 0.142 | 4.89E-13 | BATF          | 1 | C1QC_KC |
| 333 | 2.37E-42 | 0.285400695 | 0.624 | 0.376 | 5.18E-38 | SMS           | 1 | C1QC_KC |
| 334 | 8.59E-39 | 0.28453766  | 0.532 | 0.301 | 1.87E-34 | RNF141        | 1 | C1QC_KC |
| 335 | 1.86E-25 | 0.283309809 | 0.427 | 0.255 | 4.05E-21 | IER5          | 1 | C1QC_KC |
| 336 | 1.41E-30 | 0.282693801 | 0.71  | 0.522 | 3.09E-26 | PPT1          | 1 | C1QC_KC |
| 337 | 7.97E-51 | 0.282661929 | 0.952 | 0.858 | 1.74E-46 | YBX1          | 1 | C1QC_KC |
| 338 | 1.64E-49 | 0.281093818 | 0.334 | 0.122 | 3.57E-45 | FLVCR2        | 1 | C1QC_KC |
| 339 | 4.14E-43 | 0.280627269 | 0.376 | 0.165 | 9.04E-39 | APH1B         | 1 | C1QC_KC |
| 340 | 9.90E-52 | 0.280463957 | 0.256 | 0.071 | 2.16E-47 | SLC38A6       | 1 | C1QC_KC |
| 341 | 4.86E-42 | 0.280437635 | 0.274 | 0.098 | 1.06E-37 | SLC8B1        | 1 | C1QC_KC |
| 342 | 3.64E-39 | 0.280324484 | 0.673 | 0.432 | 7.93E-35 | ATP6AP1       | 1 | C1QC_KC |
| 343 | 1.45E-39 | 0.279136474 | 0.527 | 0.291 | 3.17E-35 | RAB32         | 1 | C1QC_KC |
| 344 | 2.56E-27 | 0.278899826 | 0.991 | 0.971 | 5.57E-23 | MT-ND2        | 1 | C1QC_KC |
| 345 | 8.24E-35 | 0.278661246 | 0.305 | 0.133 | 1.80E-30 | MIR181A1HG    | 1 | C1QC_KC |
| 346 | 3.17E-54 | 0.278626296 | 0.349 | 0.127 | 6.90E-50 | STARD3        | 1 | C1QC_KC |
| 347 | 1.60E-55 | 0.278431259 | 0.278 | 0.08  | 3.49E-51 | CD180         | 1 | C1QC_KC |
| 348 | 3.78E-31 | 0.277745447 | 0.229 | 0.089 | 8.24E-27 | CLEC10A       | 1 | C1QC_KC |
| 349 | 1.60E-43 | 0.277253732 | 0.268 | 0.093 | 3.49E-39 | TPM1          | 1 | C1QC_KC |
| 350 | 1.11E-39 | 0.27693186  | 0.449 | 0.23  | 2.41E-35 | SCIMP         | 1 | C1QC_KC |
| 351 | 1.24E-50 | 0.275820206 | 0.257 | 0.073 | 2.69E-46 | CTNND1        | 1 | C1QC_KC |
| 352 | 2.53E-63 | 0.275817112 | 0.239 | 0.048 | 5.51E-59 | PIK3IP1       | 1 | C1QC_KC |
| 353 | 2.14E-46 | 0.274817862 | 0.319 | 0.122 | 4.67E-42 | PCBD1         | 1 | C1QC_KC |
| 354 | 5.36E-69 | 0.272190717 | 0.188 | 0.018 | 1.17E-64 | HLA-DOA       | 1 | C1QC_KC |
| 355 | 3.33E-41 | 0.271875108 | 0.385 | 0.175 | 7.25E-37 | GOLGA4        | 1 | C1QC_KC |
| 356 | 1.74E-47 | 0.271775229 | 0.376 | 0.156 | 3.79E-43 | FEZ2          | 1 | C1QC_KC |
| 357 | 7.07E-37 | 0.271729977 | 0.462 | 0.251 | 1.54E-32 | NANS          | 1 | C1QC_KC |
| 358 | 6.11E-44 | 0.271685991 | 0.279 | 0.097 | 1.33E-39 | CH17-340M24.3 | 1 | C1QC_KC |
| 359 | 1.79E-38 | 0.271673846 | 0.471 | 0.253 | 3.90E-34 | ADI1          | 1 | C1QC_KC |
| 360 | 2.17E-59 | 0.271574919 | 0.298 | 0.086 | 4.73E-55 | ABHD12        | 1 | C1QC_KC |
| 361 | 2.61E-30 | 0.270474634 | 0.33  | 0.161 | 5.68E-26 | ARID5A        | 1 | C1QC_KC |
| 362 | 4.15E-41 | 0.270158842 | 0.335 | 0.137 | 9.05E-37 | PVRL2         | 1 | C1QC_KC |
| 363 | 3.75E-32 | 0.26959547  | 0.216 | 0.079 | 8.18E-28 | ABL2          | 1 | C1QC_KC |
| 364 | 5.53E-21 | 0.269064576 | 0.495 | 0.324 | 1.21E-16 | STAB1         | 1 | C1QC_KC |
| 365 | 2.50E-43 | 0.268647818 | 0.41  | 0.189 | 5.45E-39 | EPB41L3       | 1 | C1QC_KC |
| 366 | 2.66E-33 | 0.267988912 | 0.332 | 0.156 | 5.80E-29 | FAM46A        | 1 | C1QC_KC |
| 367 | 5.17E-76 | 0.267723484 | 0.178 | 0.007 | 1.13E-71 | SCN1B         | 1 | C1QC_KC |
| 368 | 8.13E-58 | 0.267402159 | 0.221 | 0.044 | 1.77E-53 | SLC29A1       | 1 | C1QC_KC |
| 369 | 2.11E-38 | 0.267359852 | 0.573 | 0.334 | 4.59E-34 | LILRB4        | 1 | C1QC_KC |
| 370 | 1.19E-26 | 0.266391666 | 0.522 | 0.328 | 2.59E-22 | SRSF7         | 1 | C1QC_KC |
| 371 | 4.96E-50 | 0.26579086  | 0.997 | 1     | 1.08E-45 | MT-CO3        | 1 | C1QC_KC |
| 372 | 1.56E-48 | 0.264815524 | 0.273 | 0.086 | 3.40E-44 | ENG           | 1 | C1QC_KC |
| 373 | 2.31E-45 | 0.264595243 | 0.263 | 0.085 | 5.03E-41 | SLC4A7        | 1 | C1QC_KC |

|     |           |              |       |       |             |                |   |         |
|-----|-----------|--------------|-------|-------|-------------|----------------|---|---------|
| 374 | 2.90E-30  | 0.26458585   | 0.577 | 0.365 | 6.32E-26    | TNFAIP2        | 1 | C1QC_KC |
| 375 | 3.27E-42  | 0.263950811  | 0.283 | 0.104 | 7.13E-38    | HERC1          | 1 | C1QC_KC |
| 376 | 8.90E-27  | 0.263912012  | 0.598 | 0.389 | 1.94E-22    | GNAS           | 1 | C1QC_KC |
| 377 | 3.18E-26  | 0.263067524  | 0.504 | 0.321 | 6.93E-22    | ZCCHC6         | 1 | C1QC_KC |
| 378 | 1.83E-14  | 0.262889512  | 0.615 | 0.479 | 3.99E-10    | DNAJB6         | 1 | C1QC_KC |
| 379 | 8.13E-43  | 0.262613368  | 0.369 | 0.159 | 1.77E-38    | ATM            | 1 | C1QC_KC |
| 380 | 2.00E-35  | 0.262157163  | 0.544 | 0.326 | 4.36E-31    | BLVRA          | 1 | C1QC_KC |
| 381 | 5.91E-75  | 0.262026458  | 0.184 | 0.011 | 1.29E-70    | CNRIP1         | 1 | C1QC_KC |
| 382 | 1.34E-14  | 0.261483846  | 0.297 | 0.185 | 2.93E-10    | LMNA           | 1 | C1QC_KC |
| 383 | 3.10E-12  | 0.260935198  | 0.699 | 0.572 | 6.75E-08    | DNAJA1         | 1 | C1QC_KC |
| 384 | 3.34E-15  | 0.260601007  | 0.669 | 0.51  | 7.28E-11    | PLIN2          | 1 | C1QC_KC |
| 385 | 1.84E-49  | 0.260544268  | 0.213 | 0.05  | 4.01E-45    | SLC23A2        | 1 | C1QC_KC |
| 386 | 1.67E-53  | 0.259760347  | 0.141 | 0.011 | 3.64E-49    | RP11-1080G15.1 | 1 | C1QC_KC |
| 387 | 5.25E-39  | 0.259322538  | 0.297 | 0.119 | 1.15E-34    | SESN3          | 1 | C1QC_KC |
| 388 | 2.42E-62  | 0.258537247  | 0.184 | 0.022 | 5.28E-58    | PKD2L1         | 1 | C1QC_KC |
| 389 | 2.89E-42  | 0.257840021  | 0.289 | 0.108 | 6.30E-38    | GSTM1          | 1 | C1QC_KC |
| 390 | 6.47E-34  | 0.257564513  | 0.277 | 0.116 | 1.41E-29    | LPAR6          | 1 | C1QC_KC |
| 391 | 8.36E-24  | 0.256695244  | 0.283 | 0.147 | 1.82E-19    | CCRL2          | 1 | C1QC_KC |
| 392 | 1.30E-65  | 0.256330554  | 0.175 | 0.015 | 2.83E-61    | ITGA9          | 1 | C1QC_KC |
| 393 | 3.44E-29  | 0.256234321  | 0.505 | 0.31  | 7.50E-25    | SNAP23         | 1 | C1QC_KC |
| 394 | 1.58E-67  | 0.256094954  | 0.168 | 0.011 | 3.45E-63    | RHOBTB1        | 1 | C1QC_KC |
| 395 | 5.09E-32  | 0.255038096  | 0.687 | 0.465 | 1.11E-27    | TUBB           | 1 | C1QC_KC |
| 396 | 1.13E-34  | 0.254924994  | 0.719 | 0.497 | 2.46E-30    | RAB5C          | 1 | C1QC_KC |
| 397 | 1.65E-51  | 0.254604153  | 0.15  | 0.017 | 3.60E-47    | CCL24          | 1 | C1QC_KC |
| 398 | 1.33E-44  | 0.254543154  | 0.381 | 0.163 | 2.89E-40    | GNB4           | 1 | C1QC_KC |
| 399 | 8.83E-41  | 0.254360609  | 0.257 | 0.09  | 1.93E-36    | PDE4DIP        | 1 | C1QC_KC |
| 400 | 5.29E-43  | 0.254049574  | 0.377 | 0.161 | 1.15E-38    | FNIP2          | 1 | C1QC_KC |
| 401 | 2.19E-20  | 0.253409824  | 0.71  | 0.526 | 4.79E-16    | DDIT4          | 1 | C1QC_KC |
| 402 | 3.05E-37  | 0.250869795  | 0.614 | 0.374 | 6.65E-33    | HNMT           | 1 | C1QC_KC |
| 403 | 2.13E-53  | 0.250320718  | 0.197 | 0.037 | 4.65E-49    | P2RY12         | 1 | C1QC_KC |
| 404 | 4.72E-33  | 0.250088042  | 0.606 | 0.381 | 1.03E-28    | IL10RA         | 1 | C1QC_KC |
| 405 | 9.29E-08  | -0.250060997 | 0.456 | 0.474 | 0.00202553  | RBM8A          | 1 | C1QC_KC |
| 406 | 3.37E-13  | -0.250577153 | 0.163 | 0.248 | 7.35E-09    | CARD19         | 1 | C1QC_KC |
| 407 | 2.59E-29  | -0.251022464 | 0.859 | 0.849 | 5.65E-25    | PTPRC          | 1 | C1QC_KC |
| 408 | 1.28E-10  | -0.251085178 | 0.495 | 0.532 | 2.80E-06    | IRAK3          | 1 | C1QC_KC |
| 409 | 1.70E-17  | -0.251176537 | 0.791 | 0.793 | 3.71E-13    | DAZAP2         | 1 | C1QC_KC |
| 410 | 6.39E-08  | -0.252555262 | 0.212 | 0.265 | 0.001394558 | QSOX1          | 1 | C1QC_KC |
| 411 | 1.39E-14  | -0.253404551 | 0.708 | 0.696 | 3.02E-10    | PSMA7          | 1 | C1QC_KC |
| 412 | 4.31E-66  | -0.253994969 | 0.975 | 0.982 | 9.40E-62    | RPL35A         | 1 | C1QC_KC |
| 413 | 3.24E-24  | -0.254085479 | 0.808 | 0.806 | 7.07E-20    | YWHAZ          | 1 | C1QC_KC |
| 414 | 2.77E-08  | -0.256015117 | 0.527 | 0.549 | 0.000604395 | DDX21          | 1 | C1QC_KC |
| 415 | 9.59E-60  | -0.256214287 | 0.981 | 0.986 | 2.09E-55    | SERF2          | 1 | C1QC_KC |
| 416 | 7.16E-16  | -0.25696199  | 0.146 | 0.241 | 1.56E-11    | DIAPH1         | 1 | C1QC_KC |
| 417 | 4.04E-22  | -0.257082394 | 0.757 | 0.806 | 8.80E-18    | C5AR1          | 1 | C1QC_KC |
| 418 | 1.40E-74  | -0.257557688 | 0.991 | 0.993 | 3.05E-70    | RPS3A          | 1 | C1QC_KC |
| 419 | 1.03E-09  | -0.257611212 | 0.424 | 0.465 | 2.24E-05    | CYTIP          | 1 | C1QC_KC |
| 420 | 2.71E-15  | -0.258181165 | 0.748 | 0.724 | 5.91E-11    | CDC42          | 1 | C1QC_KC |
| 421 | 6.71E-19  | -0.258887397 | 0.679 | 0.709 | 1.46E-14    | LRRFIP1        | 1 | C1QC_KC |
| 422 | 4.67E-85  | -0.259083311 | 0.995 | 0.998 | 1.02E-80    | RPL11          | 1 | C1QC_KC |
| 423 | 9.09E-09  | -0.259283555 | 0.445 | 0.471 | 0.000198149 | PSMA1          | 1 | C1QC_KC |
| 424 | 3.86E-18  | -0.259412996 | 0.728 | 0.734 | 8.42E-14    | RHOG           | 1 | C1QC_KC |
| 425 | 2.05E-10  | -0.259689076 | 0.559 | 0.564 | 4.48E-06    | C7orf73        | 1 | C1QC_KC |
| 426 | 7.93E-14  | -0.259979725 | 0.206 | 0.29  | 1.73E-09    | CCDC109B       | 1 | C1QC_KC |
| 427 | 1.90E-10  | -0.260079868 | 0.343 | 0.419 | 4.14E-06    | TMEM176A       | 1 | C1QC_KC |
| 428 | 2.83E-08  | -0.260482441 | 0.236 | 0.292 | 0.000616987 | PTK2B          | 1 | C1QC_KC |
| 429 | 1.40E-16  | -0.260703455 | 0.776 | 0.766 | 3.06E-12    | H2AFZ          | 1 | C1QC_KC |
| 430 | 1.31E-10  | -0.260784171 | 0.524 | 0.548 | 2.86E-06    | PET100         | 1 | C1QC_KC |
| 431 | 2.02E-10  | -0.261010259 | 0.119 | 0.186 | 4.41E-06    | TLE3           | 1 | C1QC_KC |
| 432 | 2.34E-07  | -0.261633684 | 0.277 | 0.322 | 0.00510896  | SHOC2          | 1 | C1QC_KC |
| 433 | 1.60E-81  | -0.261722545 | 0.993 | 0.995 | 3.49E-77    | RPS15A         | 1 | C1QC_KC |
| 434 | 1.03E-22  | -0.26190969  | 0.789 | 0.794 | 2.24E-18    | UBL5           | 1 | C1QC_KC |
| 435 | 2.12E-11  | -0.262148685 | 0.224 | 0.298 | 4.63E-07    | ACTN4          | 1 | C1QC_KC |
| 436 | 4.35E-13  | -0.262459548 | 0.103 | 0.181 | 9.50E-09    | TMEM170B       | 1 | C1QC_KC |
| 437 | 2.35E-24  | -0.263364306 | 0.832 | 0.822 | 5.12E-20    | MYL12B         | 1 | C1QC_KC |
| 438 | 3.09E-65  | -0.264188226 | 0.968 | 0.97  | 6.74E-61    | RPS4X          | 1 | C1QC_KC |
| 439 | 3.36E-11  | -0.265600601 | 0.49  | 0.533 | 7.32E-07    | STK17B         | 1 | C1QC_KC |
| 440 | 4.21E-07  | -0.265602343 | 0.281 | 0.323 | 0.009185303 | FAM198B        | 1 | C1QC_KC |
| 441 | 8.23E-19  | -0.266495535 | 0.742 | 0.741 | 1.79E-14    | COX7A2         | 1 | C1QC_KC |
| 442 | 2.63E-13  | -0.266718331 | 0.266 | 0.346 | 5.73E-09    | SHKBP1         | 1 | C1QC_KC |
| 443 | 1.02E-113 | -0.267606377 | 0.995 | 0.998 | 2.22E-109   | RPL28          | 1 | C1QC_KC |
| 444 | 1.40E-11  | -0.267900167 | 0.51  | 0.541 | 3.05E-07    | SRSF2          | 1 | C1QC_KC |
| 445 | 1.63E-25  | -0.268888928 | 0.813 | 0.783 | 3.55E-21    | HNRNPA1        | 1 | C1QC_KC |
| 446 | 2.11E-07  | -0.269166606 | 0.481 | 0.498 | 0.004590823 | COX17          | 1 | C1QC_KC |
| 447 | 3.22E-78  | -0.27044697  | 0.996 | 0.996 | 7.02E-74    | RPS13          | 1 | C1QC_KC |
| 448 | 1.43E-10  | -0.271344219 | 0.24  | 0.307 | 3.12E-06    | RARA           | 1 | C1QC_KC |



|     |           |              |       |       |             |             |   |         |
|-----|-----------|--------------|-------|-------|-------------|-------------|---|---------|
| 449 | 1.13E-15  | -0.272145985 | 0.11  | 0.197 | 2.47E-11    | MSRB1       | 1 | C1QC_KC |
| 450 | 1.46E-13  | -0.272362544 | 0.51  | 0.552 | 3.18E-09    | RBX1        | 1 | C1QC_KC |
| 451 | 3.73E-15  | -0.273351613 | 0.132 | 0.22  | 8.13E-11    | PXN         | 1 | C1QC_KC |
| 452 | 4.67E-13  | -0.274742288 | 0.612 | 0.626 | 1.02E-08    | AHNAK       | 1 | C1QC_KC |
| 453 | 1.18E-07  | -0.275517486 | 0.132 | 0.184 | 0.002571355 | IL1RAP      | 1 | C1QC_KC |
| 454 | 1.61E-09  | -0.275936432 | 0.297 | 0.355 | 3.50E-05    | CLEC4A      | 1 | C1QC_KC |
| 455 | 9.05E-17  | -0.276187061 | 0.389 | 0.489 | 1.97E-12    | MXD1        | 1 | C1QC_KC |
| 456 | 1.37E-71  | -0.276292343 | 0.965 | 0.979 | 2.99E-67    | RPS3        | 1 | C1QC_KC |
| 457 | 1.35E-10  | -0.276487524 | 0.309 | 0.37  | 2.94E-06    | PECAM1      | 1 | C1QC_KC |
| 458 | 1.43E-23  | -0.276560705 | 0.749 | 0.755 | 3.11E-19    | PRR13       | 1 | C1QC_KC |
| 459 | 5.42E-09  | -0.277134473 | 0.207 | 0.273 | 0.000118237 | ZC3H12A     | 1 | C1QC_KC |
| 460 | 3.71E-17  | -0.28031448  | 0.69  | 0.688 | 8.08E-13    | ACTR2       | 1 | C1QC_KC |
| 461 | 1.38E-11  | -0.280482988 | 0.157 | 0.231 | 3.02E-07    | PLXNC1      | 1 | C1QC_KC |
| 462 | 9.03E-15  | -0.281531815 | 0.597 | 0.612 | 1.97E-10    | C4orf3      | 1 | C1QC_KC |
| 463 | 3.52E-18  | -0.281535171 | 0.766 | 0.754 | 7.68E-14    | AP1S2       | 1 | C1QC_KC |
| 464 | 1.76E-09  | -0.281902697 | 0.331 | 0.388 | 3.84E-05    | HACD4       | 1 | C1QC_KC |
| 465 | 6.88E-23  | -0.282104899 | 0.827 | 0.824 | 1.50E-18    | TKT         | 1 | C1QC_KC |
| 466 | 6.35E-11  | -0.282346332 | 0.28  | 0.345 | 1.39E-06    | FLOT1       | 1 | C1QC_KC |
| 467 | 1.13E-13  | -0.282938327 | 0.26  | 0.341 | 2.46E-09    | PLIN3       | 1 | C1QC_KC |
| 468 | 1.94E-45  | -0.283230414 | 0.932 | 0.925 | 4.24E-41    | BTF3        | 1 | C1QC_KC |
| 469 | 6.04E-14  | -0.283637678 | 0.27  | 0.352 | 1.32E-09    | LAT2        | 1 | C1QC_KC |
| 470 | 1.44E-107 | -0.284127907 | 0.993 | 0.995 | 3.15E-103   | RPL32       | 1 | C1QC_KC |
| 471 | 1.13E-20  | -0.285031381 | 0.679 | 0.735 | 2.46E-16    | RGS2        | 1 | C1QC_KC |
| 472 | 1.86E-13  | -0.2851197   | 0.436 | 0.489 | 4.05E-09    | PPP4C       | 1 | C1QC_KC |
| 473 | 2.22E-14  | -0.285126443 | 0.547 | 0.571 | 4.84E-10    | COX7A2L     | 1 | C1QC_KC |
| 474 | 6.89E-15  | -0.28615512  | 0.383 | 0.465 | 1.50E-10    | LINC00936   | 1 | C1QC_KC |
| 475 | 9.15E-09  | -0.286639246 | 0.305 | 0.353 | 0.000199464 | CHIC2       | 1 | C1QC_KC |
| 476 | 3.73E-73  | -0.286793398 | 0.979 | 0.979 | 8.14E-69    | RPL6        | 1 | C1QC_KC |
| 477 | 1.82E-12  | -0.287002557 | 0.412 | 0.463 | 3.96E-08    | RNF7        | 1 | C1QC_KC |
| 478 | 1.06E-32  | -0.287321362 | 0.806 | 0.805 | 2.32E-28    | FKBP1A      | 1 | C1QC_KC |
| 479 | 7.48E-35  | -0.287731808 | 0.855 | 0.841 | 1.63E-30    | TMA7        | 1 | C1QC_KC |
| 480 | 3.24E-18  | -0.288084319 | 0.133 | 0.241 | 7.07E-14    | CREB5       | 1 | C1QC_KC |
| 481 | 4.55E-39  | -0.288346524 | 0.855 | 0.855 | 9.92E-35    | ARHGDIB     | 1 | C1QC_KC |
| 482 | 8.06E-12  | -0.288798328 | 0.557 | 0.565 | 1.76E-07    | MSN         | 1 | C1QC_KC |
| 483 | 8.48E-69  | -0.288802279 | 0.981 | 0.989 | 1.85E-64    | ATP5E       | 1 | C1QC_KC |
| 484 | 2.20E-13  | -0.290936029 | 0.785 | 0.749 | 4.79E-09    | TAGLN2      | 1 | C1QC_KC |
| 485 | 1.55E-14  | -0.293240127 | 0.151 | 0.24  | 3.39E-10    | R3HDM4      | 1 | C1QC_KC |
| 486 | 1.26E-09  | -0.294988919 | 0.307 | 0.361 | 2.74E-05    | USP3        | 1 | C1QC_KC |
| 487 | 7.88E-08  | -0.296087113 | 0.407 | 0.43  | 0.001718329 | NUP214      | 1 | C1QC_KC |
| 488 | 1.55E-18  | -0.296127389 | 0.122 | 0.224 | 3.37E-14    | HEBP2       | 1 | C1QC_KC |
| 489 | 4.50E-17  | -0.296363434 | 0.118 | 0.212 | 9.82E-13    | ZNF281      | 1 | C1QC_KC |
| 490 | 4.11E-08  | -0.296604031 | 0.239 | 0.293 | 0.000897137 | MIR4435-2HG | 1 | C1QC_KC |
| 491 | 1.21E-12  | -0.297180137 | 0.383 | 0.443 | 2.65E-08    | CKLF        | 1 | C1QC_KC |
| 492 | 5.01E-112 | -0.297786082 | 0.996 | 0.997 | 1.09E-107   | RPLP1       | 1 | C1QC_KC |
| 493 | 1.83E-88  | -0.29879881  | 0.974 | 0.985 | 4.00E-84    | RPL8        | 1 | C1QC_KC |
| 494 | 8.02E-11  | -0.298875356 | 0.18  | 0.251 | 1.75E-06    | RAB11FIP1   | 1 | C1QC_KC |
| 495 | 2.03E-13  | -0.300046067 | 0.718 | 0.68  | 4.42E-09    | CD99        | 1 | C1QC_KC |
| 496 | 7.03E-17  | -0.300110695 | 0.249 | 0.351 | 1.53E-12    | JAML        | 1 | C1QC_KC |
| 497 | 1.28E-30  | -0.300156958 | 0.815 | 0.798 | 2.80E-26    | SPI1        | 1 | C1QC_KC |
| 498 | 4.71E-13  | -0.30063495  | 0.392 | 0.451 | 1.03E-08    | EFHD2       | 1 | C1QC_KC |
| 499 | 2.32E-13  | -0.300840147 | 0.202 | 0.283 | 5.06E-09    | TMPO        | 1 | C1QC_KC |
| 500 | 4.60E-13  | -0.301300413 | 0.306 | 0.378 | 1.00E-08    | ARPC4       | 1 | C1QC_KC |
| 501 | 1.17E-43  | -0.301517018 | 0.907 | 0.902 | 2.56E-39    | RPS26       | 1 | C1QC_KC |
| 502 | 3.04E-14  | -0.302003147 | 0.117 | 0.199 | 6.64E-10    | ANXA6       | 1 | C1QC_KC |
| 503 | 1.65E-10  | -0.302061475 | 0.483 | 0.511 | 3.59E-06    | CSF3R       | 1 | C1QC_KC |
| 504 | 8.17E-14  | -0.302712562 | 0.18  | 0.262 | 1.78E-09    | SLC36A4     | 1 | C1QC_KC |
| 505 | 2.68E-88  | -0.303105414 | 0.984 | 0.991 | 5.84E-84    | RPS7        | 1 | C1QC_KC |
| 506 | 2.12E-41  | -0.30403891  | 0.862 | 0.877 | 4.61E-37    | GNG5        | 1 | C1QC_KC |
| 507 | 9.51E-49  | -0.304045387 | 0.88  | 0.892 | 2.07E-44    | ARPC2       | 1 | C1QC_KC |
| 508 | 9.65E-15  | -0.304685016 | 0.409 | 0.483 | 2.10E-10    | TNFSF13B    | 1 | C1QC_KC |
| 509 | 1.77E-20  | -0.305033467 | 0.66  | 0.687 | 3.86E-16    | POLR2L      | 1 | C1QC_KC |
| 510 | 4.86E-16  | -0.305458948 | 0.618 | 0.625 | 1.06E-11    | GNAI2       | 1 | C1QC_KC |
| 511 | 2.14E-60  | -0.305732413 | 0.939 | 0.942 | 4.67E-56    | RPL7        | 1 | C1QC_KC |
| 512 | 8.87E-20  | -0.306019622 | 0.58  | 0.614 | 1.93E-15    | PSMB3       | 1 | C1QC_KC |
| 513 | 5.88E-10  | -0.309600844 | 0.532 | 0.591 | 1.28E-05    | CXCL8       | 1 | C1QC_KC |
| 514 | 4.64E-13  | -0.310034259 | 0.245 | 0.325 | 1.01E-08    | ZDHHC20     | 1 | C1QC_KC |
| 515 | 3.51E-11  | -0.310286399 | 0.495 | 0.518 | 7.66E-07    | SFPQ        | 1 | C1QC_KC |
| 516 | 1.27E-14  | -0.310317511 | 0.314 | 0.39  | 2.77E-10    | NUMB        | 1 | C1QC_KC |
| 517 | 2.39E-15  | -0.311014968 | 0.16  | 0.255 | 5.22E-11    | NFIL3       | 1 | C1QC_KC |
| 518 | 3.44E-25  | -0.31103716  | 0.712 | 0.73  | 7.50E-21    | CAP1        | 1 | C1QC_KC |
| 519 | 1.76E-13  | -0.31211136  | 0.355 | 0.42  | 3.83E-09    | MYH9        | 1 | C1QC_KC |
| 520 | 6.27E-16  | -0.31231499  | 0.627 | 0.639 | 1.37E-11    | NDUFB1      | 1 | C1QC_KC |
| 521 | 3.50E-16  | -0.31307431  | 0.256 | 0.345 | 7.64E-12    | POLE4       | 1 | C1QC_KC |
| 522 | 1.74E-33  | -0.313291679 | 0.776 | 0.797 | 3.79E-29    | COMMD6      | 1 | C1QC_KC |
| 523 | 2.76E-127 | -0.316327042 | 0.992 | 0.998 | 6.02E-123   | RPL34       | 1 | C1QC_KC |

|     |           |              |       |       |           |            |   |         |
|-----|-----------|--------------|-------|-------|-----------|------------|---|---------|
| 524 | 8.19E-38  | -0.316754198 | 0.796 | 0.824 | 1.79E-33  | TPI1       | 1 | C1QC_KC |
| 525 | 4.28E-25  | -0.318706782 | 0.674 | 0.692 | 9.33E-21  | PRELID1    | 1 | C1QC_KC |
| 526 | 7.43E-14  | -0.319679214 | 0.126 | 0.211 | 1.62E-09  | ANKRD28    | 1 | C1QC_KC |
| 527 | 5.88E-27  | -0.321666358 | 0.83  | 0.875 | 1.28E-22  | NAMPT      | 1 | C1QC_KC |
| 528 | 5.47E-24  | -0.323748427 | 0.181 | 0.304 | 1.19E-19  | SASH3      | 1 | C1QC_KC |
| 529 | 4.01E-14  | -0.323791619 | 0.292 | 0.375 | 8.74E-10  | SLC25A37   | 1 | C1QC_KC |
| 530 | 2.21E-27  | -0.324178352 | 0.712 | 0.775 | 4.82E-23  | SAMSN1     | 1 | C1QC_KC |
| 531 | 4.93E-19  | -0.324752781 | 0.885 | 0.878 | 1.08E-14  | TIMP1      | 1 | C1QC_KC |
| 532 | 9.79E-14  | -0.325104702 | 0.167 | 0.251 | 2.13E-09  | PHC2       | 1 | C1QC_KC |
| 533 | 4.06E-31  | -0.325594587 | 0.71  | 0.745 | 8.86E-27  | SEC61B     | 1 | C1QC_KC |
| 534 | 3.92E-52  | -0.327211205 | 0.874 | 0.897 | 8.56E-48  | ARPC1B     | 1 | C1QC_KC |
| 535 | 3.01E-28  | -0.329524643 | 0.671 | 0.73  | 6.57E-24  | HCST       | 1 | C1QC_KC |
| 536 | 2.86E-19  | -0.330040892 | 0.468 | 0.534 | 6.23E-15  | MTPN       | 1 | C1QC_KC |
| 537 | 3.46E-36  | -0.331241906 | 0.79  | 0.81  | 7.54E-32  | COX8A      | 1 | C1QC_KC |
| 538 | 8.83E-32  | -0.33423141  | 0.81  | 0.818 | 1.93E-27  | ZEB2       | 1 | C1QC_KC |
| 539 | 1.67E-35  | -0.337641969 | 0.755 | 0.77  | 3.64E-31  | ZYX        | 1 | C1QC_KC |
| 540 | 7.49E-81  | -0.341511892 | 0.967 | 0.977 | 1.63E-76  | NACA       | 1 | C1QC_KC |
| 541 | 1.22E-37  | -0.341640257 | 0.822 | 0.839 | 2.66E-33  | BTG1       | 1 | C1QC_KC |
| 542 | 2.03E-16  | -0.341753855 | 0.336 | 0.42  | 4.43E-12  | GNAQ       | 1 | C1QC_KC |
| 543 | 1.88E-135 | -0.343533456 | 0.996 | 0.996 | 4.10E-131 | RPS8       | 1 | C1QC_KC |
| 544 | 1.21E-23  | -0.344305751 | 0.437 | 0.545 | 2.63E-19  | TMEM176B   | 1 | C1QC_KC |
| 545 | 2.37E-20  | -0.349042007 | 0.524 | 0.579 | 5.17E-16  | ROMO1      | 1 | C1QC_KC |
| 546 | 8.40E-23  | -0.351508774 | 0.178 | 0.296 | 1.83E-18  | GAS7       | 1 | C1QC_KC |
| 547 | 4.73E-20  | -0.35151273  | 0.525 | 0.59  | 1.03E-15  | UPP1       | 1 | C1QC_KC |
| 548 | 9.03E-44  | -0.35222474  | 0.828 | 0.847 | 1.97E-39  | LCP1       | 1 | C1QC_KC |
| 549 | 1.92E-119 | -0.352873477 | 0.974 | 0.978 | 4.19E-115 | OAZ1       | 1 | C1QC_KC |
| 550 | 1.23E-14  | -0.354604944 | 0.338 | 0.407 | 2.69E-10  | GYG1       | 1 | C1QC_KC |
| 551 | 4.30E-133 | -0.355724283 | 0.989 | 0.994 | 9.38E-129 | FAU        | 1 | C1QC_KC |
| 552 | 2.80E-19  | -0.356652612 | 0.225 | 0.337 | 6.11E-15  | PTGER2     | 1 | C1QC_KC |
| 553 | 3.63E-21  | -0.357960282 | 0.155 | 0.265 | 7.92E-17  | HRH2       | 1 | C1QC_KC |
| 554 | 8.42E-20  | -0.358925295 | 0.424 | 0.5   | 1.84E-15  | PTP4A2     | 1 | C1QC_KC |
| 555 | 1.68E-18  | -0.359754009 | 0.385 | 0.461 | 3.67E-14  | FERMT3     | 1 | C1QC_KC |
| 556 | 3.19E-31  | -0.360817746 | 0.7   | 0.748 | 6.95E-27  | PGK1       | 1 | C1QC_KC |
| 557 | 5.74E-26  | -0.361420354 | 0.517 | 0.597 | 1.25E-21  | TRAPPC1    | 1 | C1QC_KC |
| 558 | 1.59E-19  | -0.361490185 | 0.246 | 0.355 | 3.46E-15  | PLEC       | 1 | C1QC_KC |
| 559 | 1.09E-23  | -0.362494113 | 0.253 | 0.371 | 2.37E-19  | IL17RA     | 1 | C1QC_KC |
| 560 | 1.21E-19  | -0.362586962 | 0.492 | 0.545 | 2.65E-15  | ROCK1      | 1 | C1QC_KC |
| 561 | 5.40E-27  | -0.363327987 | 0.695 | 0.741 | 1.18E-22  | IFI30      | 1 | C1QC_KC |
| 562 | 1.01E-09  | -0.364908017 | 0.17  | 0.096 | 2.21E-05  | MT1G       | 1 | C1QC_KC |
| 563 | 9.63E-174 | -0.366650143 | 0.994 | 0.996 | 2.10E-169 | RPS24      | 1 | C1QC_KC |
| 564 | 8.72E-24  | -0.367865484 | 0.228 | 0.347 | 1.90E-19  | G6PD       | 1 | C1QC_KC |
| 565 | 3.72E-19  | -0.367942145 | 0.283 | 0.386 | 8.12E-15  | SH3KBP1    | 1 | C1QC_KC |
| 566 | 1.54E-24  | -0.368495753 | 0.205 | 0.33  | 3.35E-20  | RASSF2     | 1 | C1QC_KC |
| 567 | 3.84E-17  | -0.37027772  | 0.458 | 0.517 | 8.37E-13  | CNIH4      | 1 | C1QC_KC |
| 568 | 5.62E-71  | -0.377059258 | 0.925 | 0.949 | 1.23E-66  | EEF1D      | 1 | C1QC_KC |
| 569 | 7.45E-27  | -0.378566378 | 0.227 | 0.359 | 1.63E-22  | FMNL1      | 1 | C1QC_KC |
| 570 | 2.32E-28  | -0.381460695 | 0.167 | 0.305 | 5.06E-24  | FAM200B    | 1 | C1QC_KC |
| 571 | 4.41E-39  | -0.385944096 | 0.171 | 0.345 | 9.63E-35  | CAPN2      | 1 | C1QC_KC |
| 572 | 1.08E-27  | -0.389046265 | 0.466 | 0.554 | 2.36E-23  | C20orf24   | 1 | C1QC_KC |
| 573 | 7.29E-23  | -0.393482196 | 0.326 | 0.427 | 1.59E-18  | LSM6       | 1 | C1QC_KC |
| 574 | 4.73E-29  | -0.397497998 | 0.209 | 0.349 | 1.03E-24  | ASGR1      | 1 | C1QC_KC |
| 575 | 2.70E-25  | -0.401079314 | 0.228 | 0.357 | 5.89E-21  | CSGALNACT2 | 1 | C1QC_KC |
| 576 | 2.45E-36  | -0.403011106 | 0.652 | 0.74  | 5.34E-32  | CD55       | 1 | C1QC_KC |
| 577 | 3.12E-59  | -0.409636945 | 0.809 | 0.846 | 6.81E-55  | C14orf2    | 1 | C1QC_KC |
| 578 | 2.57E-24  | -0.409704273 | 0.52  | 0.613 | 5.59E-20  | ACSL1      | 1 | C1QC_KC |
| 579 | 3.14E-40  | -0.409820668 | 0.599 | 0.683 | 6.84E-36  | CAST       | 1 | C1QC_KC |
| 580 | 7.20E-25  | -0.411129915 | 0.181 | 0.312 | 1.57E-20  | CD36       | 1 | C1QC_KC |
| 581 | 3.36E-13  | -0.411866231 | 0.397 | 0.445 | 7.34E-09  | PAG1       | 1 | C1QC_KC |
| 582 | 1.40E-58  | -0.412906271 | 0.808 | 0.855 | 3.04E-54  | TCEB2      | 1 | C1QC_KC |
| 583 | 9.98E-40  | -0.413063071 | 0.698 | 0.739 | 2.18E-35  | SEC61G     | 1 | C1QC_KC |
| 584 | 7.88E-29  | -0.413225174 | 0.107 | 0.238 | 1.72E-24  | CPD        | 1 | C1QC_KC |
| 585 | 4.11E-23  | -0.413322314 | 0.199 | 0.317 | 8.97E-19  | UBR4       | 1 | C1QC_KC |
| 586 | 4.16E-51  | -0.41640492  | 0.752 | 0.775 | 9.08E-47  | RBM3       | 1 | C1QC_KC |
| 587 | 4.66E-47  | -0.417284751 | 0.726 | 0.779 | 1.02E-42  | SUB1       | 1 | C1QC_KC |
| 588 | 5.11E-32  | -0.418155964 | 0.522 | 0.626 | 1.12E-27  | RILPL2     | 1 | C1QC_KC |
| 589 | 2.00E-54  | -0.420242562 | 0.806 | 0.825 | 4.37E-50  | TPM3       | 1 | C1QC_KC |
| 590 | 2.07E-102 | -0.422301258 | 0.977 | 0.994 | 4.50E-98  | VIM        | 1 | C1QC_KC |
| 591 | 2.16E-24  | -0.427788855 | 0.37  | 0.472 | 4.71E-20  | IRS2       | 1 | C1QC_KC |
| 592 | 3.52E-30  | -0.432770199 | 0.348 | 0.481 | 7.69E-26  | ITGAM      | 1 | C1QC_KC |
| 593 | 3.25E-27  | -0.438745559 | 0.395 | 0.493 | 7.08E-23  | CCND3      | 1 | C1QC_KC |
| 594 | 3.08E-69  | -0.442004126 | 0.838 | 0.89  | 6.72E-65  | MYL12A     | 1 | C1QC_KC |
| 595 | 1.93E-67  | -0.443671035 | 0.821 | 0.858 | 4.20E-63  | FXDY5      | 1 | C1QC_KC |
| 596 | 1.29E-38  | -0.445115751 | 0.518 | 0.608 | 2.80E-34  | CD48       | 1 | C1QC_KC |
| 597 | 1.81E-46  | -0.445190907 | 0.121 | 0.305 | 3.94E-42  | PSTPIP1    | 1 | C1QC_KC |
| 598 | 1.92E-32  | -0.446815984 | 0.185 | 0.336 | 4.19E-28  | LRRK2      | 1 | C1QC_KC |

|     |           |               |       |       |           |               |   |         |
|-----|-----------|---------------|-------|-------|-----------|---------------|---|---------|
| 599 | 4.65E-32  | -0.448685346  | 0.217 | 0.365 | 1.01E-27  | LYST          | 1 | C1QC_KC |
| 600 | 1.15E-36  | -0.450574863  | 0.503 | 0.609 | 2.50E-32  | UBE2D1        | 1 | C1QC_KC |
| 601 | 1.07E-54  | -0.458363904  | 0.701 | 0.77  | 2.33E-50  | GMFG          | 1 | C1QC_KC |
| 602 | 1.05E-39  | -0.458497684  | 0.278 | 0.433 | 2.28E-35  | PNPLA2        | 1 | C1QC_KC |
| 603 | 3.83E-181 | -0.462774049  | 0.997 | 0.997 | 8.36E-177 | RPL39         | 1 | C1QC_KC |
| 604 | 2.01E-29  | -0.463991473  | 0.231 | 0.37  | 4.39E-25  | RNASE2        | 1 | C1QC_KC |
| 605 | 2.45E-51  | -0.464132066  | 0.121 | 0.317 | 5.33E-47  | CCDC69        | 1 | C1QC_KC |
| 606 | 2.14E-40  | -0.465966138  | 0.385 | 0.553 | 4.66E-36  | MYADM         | 1 | C1QC_KC |
| 607 | 4.94E-44  | -0.469419214  | 0.57  | 0.663 | 1.08E-39  | NDUFB9        | 1 | C1QC_KC |
| 608 | 1.43E-52  | -0.48408316   | 0.583 | 0.713 | 3.12E-48  | TYMP          | 1 | C1QC_KC |
| 609 | 3.35E-31  | -0.484105963  | 0.158 | 0.303 | 7.31E-27  | ASPH          | 1 | C1QC_KC |
| 610 | 4.05E-45  | -0.485669323  | 0.431 | 0.572 | 8.83E-41  | NCF2          | 1 | C1QC_KC |
| 611 | 7.75E-43  | -0.488718548  | 0.488 | 0.595 | 1.69E-38  | PGAM1         | 1 | C1QC_KC |
| 612 | 2.69E-43  | -0.490800372  | 0.483 | 0.596 | 5.88E-39  | RAC2          | 1 | C1QC_KC |
| 613 | 8.78E-56  | -0.491610783  | 0.692 | 0.746 | 1.92E-51  | ENO1          | 1 | C1QC_KC |
| 614 | 1.21E-57  | -0.493214617  | 0.124 | 0.341 | 2.63E-53  | ANPEP         | 1 | C1QC_KC |
| 615 | 5.30E-30  | -0.493490953  | 0.279 | 0.426 | 1.16E-25  | NLRP3         | 1 | C1QC_KC |
| 616 | 5.31E-25  | -0.498588386  | 0.617 | 0.663 | 1.16E-20  | CD52          | 1 | C1QC_KC |
| 617 | 5.76E-51  | -0.49993809   | 0.654 | 0.727 | 1.26E-46  | APLP2         | 1 | C1QC_KC |
| 618 | 3.54E-40  | -0.504337608  | 0.457 | 0.579 | 7.72E-36  | TMEM167A      | 1 | C1QC_KC |
| 619 | 6.59E-43  | -0.505719351  | 0.219 | 0.398 | 1.44E-38  | CDC42EP3      | 1 | C1QC_KC |
| 620 | 6.51E-94  | -0.507767841  | 0.798 | 0.889 | 1.42E-89  | EMP3          | 1 | C1QC_KC |
| 621 | 2.06E-36  | -0.510795445  | 0.449 | 0.646 | 4.49E-32  | AREG          | 1 | C1QC_KC |
| 622 | 2.08E-26  | -0.51338803   | 0.297 | 0.419 | 4.53E-22  | NCF1          | 1 | C1QC_KC |
| 623 | 8.68E-29  | -0.518508875  | 0.299 | 0.422 | 1.89E-24  | AGFG1         | 1 | C1QC_KC |
| 624 | 8.14E-53  | -0.524933178  | 0.244 | 0.436 | 1.78E-48  | C19orf38      | 1 | C1QC_KC |
| 625 | 2.46E-29  | -0.530802469  | 0.137 | 0.275 | 5.37E-25  | NKG7          | 1 | C1QC_KC |
| 626 | 8.92E-53  | -0.532075187  | 0.503 | 0.638 | 1.95E-48  | AGTRAP        | 1 | C1QC_KC |
| 627 | 6.05E-31  | -0.536041417  | 0.133 | 0.276 | 1.32E-26  | CYP1B1        | 1 | C1QC_KC |
| 628 | 1.30E-204 | -0.545847261  | 0.964 | 0.978 | 2.84E-200 | PFN1          | 1 | C1QC_KC |
| 629 | 1.25E-48  | -0.55090789   | 0.174 | 0.374 | 2.74E-44  | TREM1         | 1 | C1QC_KC |
| 630 | 5.40E-58  | -0.551995052  | 0.405 | 0.6   | 1.18E-53  | CLEC4E        | 1 | C1QC_KC |
| 631 | 3.35E-49  | -0.552808884  | 0.362 | 0.528 | 7.32E-45  | FBXL5         | 1 | C1QC_KC |
| 632 | 5.57E-127 | -0.552819539  | 0.852 | 0.914 | 1.21E-122 | CLIC1         | 1 | C1QC_KC |
| 633 | 3.52E-67  | -0.555029933  | 0.639 | 0.73  | 7.67E-63  | ANXA2         | 1 | C1QC_KC |
| 634 | 3.35E-150 | -0.55526876   | 0.983 | 0.996 | 7.30E-146 | SRGN          | 1 | C1QC_KC |
| 635 | 7.16E-69  | -0.560606983  | 0.417 | 0.621 | 1.56E-64  | FLNA          | 1 | C1QC_KC |
| 636 | 2.82E-189 | -0.563688303  | 0.972 | 0.987 | 6.16E-185 | S100A11       | 1 | C1QC_KC |
| 637 | 3.43E-71  | -0.566579658  | 0.225 | 0.475 | 7.48E-67  | MYO1G         | 1 | C1QC_KC |
| 638 | 9.64E-217 | -0.566867491  | 0.972 | 0.991 | 2.10E-212 | H3F3A         | 1 | C1QC_KC |
| 639 | 2.32E-68  | -0.578574448  | 0.588 | 0.728 | 5.06E-64  | SLC11A1       | 1 | C1QC_KC |
| 640 | 4.63E-165 | -0.579610374  | 0.893 | 0.946 | 1.01E-160 | ALDOA         | 1 | C1QC_KC |
| 641 | 5.41E-50  | -0.589184291  | 0.383 | 0.537 | 1.18E-45  | METTL9        | 1 | C1QC_KC |
| 642 | 5.61E-45  | -0.594187177  | 0.442 | 0.583 | 1.22E-40  | HMGB2         | 1 | C1QC_KC |
| 643 | 1.21E-111 | -0.596826602  | 0.614 | 0.846 | 2.64E-107 | ANXA1         | 1 | C1QC_KC |
| 644 | 1.67E-196 | -0.608739259  | 0.933 | 0.961 | 3.63E-192 | CFL1          | 1 | C1QC_KC |
| 645 | 1.09E-70  | -0.62740042   | 0.476 | 0.662 | 2.38E-66  | PTPRE         | 1 | C1QC_KC |
| 646 | 2.17E-49  | -0.627663765  | 0.422 | 0.574 | 4.73E-45  | TPM4          | 1 | C1QC_KC |
| 647 | 2.45E-103 | -0.635125354  | 0.759 | 0.888 | 5.33E-99  | SERPINB1      | 1 | C1QC_KC |
| 648 | 1.46E-54  | -0.646094033  | 0.148 | 0.353 | 3.19E-50  | FPR2          | 1 | C1QC_KC |
| 649 | 7.95E-98  | -0.651826389  | 0.575 | 0.765 | 1.73E-93  | CD37          | 1 | C1QC_KC |
| 650 | 1.12E-72  | -0.657363779  | 0.625 | 0.798 | 2.45E-68  | PLAUR         | 1 | C1QC_KC |
| 651 | 7.07E-94  | -0.659869416  | 0.618 | 0.756 | 1.54E-89  | TALDO1        | 1 | C1QC_KC |
| 652 | 1.37E-199 | -0.661060758  | 0.939 | 0.982 | 2.98E-195 | ACTG1         | 1 | C1QC_KC |
| 653 | 3.12E-45  | -0.665565132  | 0.838 | 0.821 | 6.80E-41  | IFITM3        | 1 | C1QC_KC |
| 654 | 2.81E-130 | -0.679992848  | 0.764 | 0.864 | 6.14E-126 | SERPINA1      | 1 | C1QC_KC |
| 655 | 8.01E-214 | -0.682982814  | 0.898 | 0.964 | 1.75E-209 | COTL1         | 1 | C1QC_KC |
| 656 | 1.80E-83  | -0.692664631  | 0.101 | 0.369 | 3.93E-79  | CD300E        | 1 | C1QC_KC |
| 657 | 1.48E-105 | -0.693476158  | 0.517 | 0.71  | 3.24E-101 | FGR           | 1 | C1QC_KC |
| 658 | 1.28E-82  | -0.702186921  | 0.55  | 0.726 | 2.79E-78  | FPR1          | 1 | C1QC_KC |
| 659 | 1.78E-88  | -0.707349222  | 0.595 | 0.805 | 3.87E-84  | BCL2A1        | 1 | C1QC_KC |
| 660 | 6.83E-235 | -0.710145516  | 0.943 | 0.98  | 1.49E-230 | MYL6          | 1 | C1QC_KC |
| 661 | 3.10E-79  | -0.719525897  | 0.365 | 0.622 | 6.75E-75  | SLC2A3        | 1 | C1QC_KC |
| 662 | 3.30E-92  | -0.734156247  | 0.427 | 0.641 | 7.20E-88  | LTA4H         | 1 | C1QC_KC |
| 663 | 5.87E-70  | -0.7411164992 | 0.137 | 0.377 | 1.28E-65  | RP11-1143G9.4 | 1 | C1QC_KC |
| 664 | 5.88E-152 | -0.745550883  | 0.666 | 0.825 | 1.28E-147 | CORO1A        | 1 | C1QC_KC |
| 665 | 5.05E-101 | -0.747383045  | 0.561 | 0.734 | 1.10E-96  | PGD           | 1 | C1QC_KC |
| 666 | 7.13E-98  | -0.754943471  | 0.448 | 0.684 | 1.55E-93  | LILRA5        | 1 | C1QC_KC |
| 667 | 2.80E-109 | -0.757204222  | 0.376 | 0.655 | 6.12E-105 | LSP1          | 1 | C1QC_KC |
| 668 | 6.99E-132 | -0.776772123  | 0.625 | 0.79  | 1.52E-127 | PKM           | 1 | C1QC_KC |
| 669 | 0         | -0.798029378  | 0.996 | 1     | 0         | ACTB          | 1 | C1QC_KC |
| 670 | 3.64E-29  | -0.805962477  | 0.259 | 0.387 | 7.94E-25  | IL1R2         | 1 | C1QC_KC |
| 671 | 6.26E-69  | -0.825142748  | 0.202 | 0.461 | 1.37E-64  | EREG          | 1 | C1QC_KC |
| 672 | 8.56E-135 | -0.844038144  | 0.214 | 0.569 | 1.87E-130 | GLIPR2        | 1 | C1QC_KC |
| 673 | 1.04E-117 | -0.860402873  | 0.215 | 0.548 | 2.26E-113 | FAM65B        | 1 | C1QC_KC |

|     |           |              |       |       |           |          |   |          |
|-----|-----------|--------------|-------|-------|-----------|----------|---|----------|
| 674 | 1.54E-143 | -0.885327093 | 0.15  | 0.543 | 3.36E-139 | CAPG     | 1 | C1QC_KC  |
| 675 | 5.33E-239 | -0.927917849 | 0.798 | 0.947 | 1.16E-234 | LGALS1   | 1 | C1QC_KC  |
| 676 | 0         | -0.932937776 | 0.967 | 0.994 | 0         | SH3BGRL3 | 1 | C1QC_KC  |
| 677 | 4.63E-148 | -0.938888714 | 0.118 | 0.5   | 1.01E-143 | MGST1    | 1 | C1QC_KC  |
| 678 | 4.44E-295 | -0.985833546 | 0.787 | 0.944 | 9.68E-291 | TSPO     | 1 | C1QC_KC  |
| 679 | 4.83E-198 | -0.989490997 | 0.788 | 0.92  | 1.05E-193 | IFITM2   | 1 | C1QC_KC  |
| 680 | 2.68E-148 | -0.995844042 | 0.642 | 0.822 | 5.85E-144 | GCA      | 1 | C1QC_KC  |
| 681 | 1.67E-171 | -1.030400857 | 0.175 | 0.586 | 3.64E-167 | PLP2     | 1 | C1QC_KC  |
| 682 | 4.78E-143 | -1.052275925 | 0.104 | 0.499 | 1.04E-138 | ALOX5AP  | 1 | C1QC_KC  |
| 683 | 2.08E-93  | -1.05232773  | 0.46  | 0.723 | 4.53E-89  | THBS1    | 1 | C1QC_KC  |
| 684 | 0         | -1.053310986 | 0.969 | 0.995 | 0         | GAPDH    | 1 | C1QC_KC  |
| 685 | 7.32E-119 | -1.053481566 | 0.297 | 0.59  | 1.60E-114 | PLBD1    | 1 | C1QC_KC  |
| 686 | 3.04E-219 | -1.092437467 | 0.53  | 0.851 | 6.62E-215 | CSTA     | 1 | C1QC_KC  |
| 687 | 1.46E-187 | -1.156403939 | 0.538 | 0.809 | 3.19E-183 | MNDA     | 1 | C1QC_KC  |
| 688 | 7.98E-120 | -1.1593338   | 0.423 | 0.679 | 1.74E-115 | CRIP1    | 1 | C1QC_KC  |
| 689 | 3.73E-151 | -1.185359103 | 0.118 | 0.505 | 8.14E-147 | SELL     | 1 | C1QC_KC  |
| 690 | 1.04E-217 | -1.310341575 | 0.514 | 0.823 | 2.28E-213 | STXBP2   | 1 | C1QC_KC  |
| 691 | 0         | -1.492075664 | 0.749 | 0.975 | 0         | S100A10  | 1 | C1QC_KC  |
| 692 | 0         | -1.698825964 | 0.929 | 0.994 | 0         | LYZ      | 1 | C1QC_KC  |
| 693 | 0         | -1.779998673 | 0.769 | 0.991 | 0         | S100A4   | 1 | C1QC_KC  |
| 694 | 0         | -1.837453737 | 0.806 | 0.995 | 0         | S100A6   | 1 | C1QC_KC  |
| 695 | 0         | -1.843919439 | 0.295 | 0.913 | 0         | FCN1     | 1 | C1QC_KC  |
| 696 | 0         | -2.522344019 | 0.122 | 0.853 | 0         | VCAN     | 1 | C1QC_KC  |
| 697 | 0         | -2.634180423 | 0.132 | 0.792 | 0         | S100A12  | 1 | C1QC_KC  |
| 698 | 0         | -2.735410856 | 0.767 | 0.977 | 0         | S100A9   | 1 | C1QC_KC  |
| 699 | 0         | -3.170438222 | 0.491 | 0.974 | 0         | S100A8   | 1 | C1QC_KC  |
| 700 | 1.01E-240 | 1.073081743  | 0.96  | 0.362 | 2.21E-236 | VCAN     | 2 | VCAN_TMo |
| 701 | 6.77E-190 | 1.014887234  | 0.985 | 0.845 | 1.48E-185 | S100A9   | 2 | VCAN_TMo |
| 702 | 4.18E-111 | 0.948979348  | 0.852 | 0.511 | 9.12E-107 | THBS1    | 2 | VCAN_TMo |
| 703 | 1.29E-114 | 0.885441073  | 0.788 | 0.479 | 2.81E-110 | CRIP1    | 2 | VCAN_TMo |
| 704 | 2.69E-198 | 0.858755689  | 0.976 | 0.509 | 5.87E-194 | FCN1     | 2 | VCAN_TMo |
| 705 | 3.73E-189 | 0.770105725  | 0.991 | 0.83  | 8.14E-185 | S100A10  | 2 | VCAN_TMo |
| 706 | 2.56E-183 | 0.740098907  | 1     | 0.951 | 5.59E-179 | LYZ      | 2 | VCAN_TMo |
| 707 | 5.41E-77  | 0.737332471  | 0.568 | 0.259 | 1.18E-72  | EREG     | 2 | VCAN_TMo |
| 708 | 8.11E-158 | 0.679785947  | 0.998 | 0.852 | 1.77E-153 | S100A4   | 2 | VCAN_TMo |
| 709 | 5.57E-100 | 0.673969833  | 0.733 | 0.418 | 1.21E-95  | TPM4     | 2 | VCAN_TMo |
| 710 | 8.76E-100 | 0.659439196  | 0.487 | 0.158 | 1.91E-95  | CD300E   | 2 | VCAN_TMo |
| 711 | 1.37E-119 | 0.614209915  | 0.698 | 0.29  | 2.98E-115 | PLP2     | 2 | VCAN_TMo |
| 712 | 2.46E-148 | 0.613494396  | 1     | 0.877 | 5.37E-144 | S100A6   | 2 | VCAN_TMo |
| 713 | 1.13E-84  | 0.591861556  | 0.405 | 0.118 | 2.48E-80  | APOBEC3A | 2 | VCAN_TMo |
| 714 | 1.77E-181 | 0.582650451  | 0.997 | 0.976 | 3.87E-177 | SH3BGRL3 | 2 | VCAN_TMo |
| 715 | 2.06E-59  | 0.575052486  | 0.247 | 0.056 | 4.49E-55  | SERPINB2 | 2 | VCAN_TMo |
| 716 | 6.33E-108 | 0.564921245  | 0.661 | 0.255 | 1.38E-103 | CAPG     | 2 | VCAN_TMo |
| 717 | 9.27E-68  | 0.56072105   | 0.89  | 0.655 | 2.02E-63  | PLAUR    | 2 | VCAN_TMo |
| 718 | 7.97E-72  | 0.549399264  | 0.489 | 0.205 | 1.74E-67  | TREM1    | 2 | VCAN_TMo |
| 719 | 4.54E-127 | 0.548084783  | 0.981 | 0.842 | 9.89E-123 | LGALS1   | 2 | VCAN_TMo |
| 720 | 2.88E-86  | 0.54722038   | 0.837 | 0.632 | 6.28E-82  | ANXA2    | 2 | VCAN_TMo |
| 721 | 9.87E-91  | 0.540769083  | 0.423 | 0.127 | 2.15E-86  | LGALS2   | 2 | VCAN_TMo |
| 722 | 1.49E-159 | 0.539589064  | 0.998 | 0.977 | 3.25E-155 | GAPDH    | 2 | VCAN_TMo |
| 723 | 2.31E-78  | 0.539448652  | 0.475 | 0.17  | 5.03E-74  | AQP9     | 2 | VCAN_TMo |
| 724 | 2.28E-72  | 0.52915434   | 0.691 | 0.396 | 4.97E-68  | MYADM    | 2 | VCAN_TMo |
| 725 | 1.02E-136 | 0.528131726  | 0.999 | 0.987 | 2.23E-132 | SRGN     | 2 | VCAN_TMo |
| 726 | 5.21E-85  | 0.511554812  | 0.854 | 0.663 | 1.14E-80  | PKM      | 2 | VCAN_TMo |
| 727 | 4.74E-38  | 0.511342492  | 0.725 | 0.495 | 1.03E-33  | AREG     | 2 | VCAN_TMo |
| 728 | 2.91E-48  | 0.496148981  | 0.964 | 0.848 | 6.34E-44  | TIMP1    | 2 | VCAN_TMo |
| 729 | 4.86E-93  | 0.4949904    | 0.497 | 0.15  | 1.06E-88  | MCEMP1   | 2 | VCAN_TMo |
| 730 | 9.10E-54  | 0.493188289  | 0.697 | 0.434 | 1.98E-49  | SLC2A3   | 2 | VCAN_TMo |
| 731 | 5.07E-91  | 0.476363566  | 0.669 | 0.311 | 1.11E-86  | GLIPR2   | 2 | VCAN_TMo |
| 732 | 2.44E-117 | 0.476068018  | 0.987 | 0.953 | 5.32E-113 | ACTG1    | 2 | VCAN_TMo |
| 733 | 4.79E-136 | 0.475463268  | 0.988 | 0.933 | 1.04E-131 | CFL1     | 2 | VCAN_TMo |
| 734 | 5.60E-50  | 0.47173898   | 0.536 | 0.292 | 1.22E-45  | NLRP3    | 2 | VCAN_TMo |
| 735 | 1.60E-83  | 0.460616551  | 0.92  | 0.675 | 3.49E-79  | ANXA1    | 2 | VCAN_TMo |
| 736 | 4.22E-62  | 0.460611379  | 0.702 | 0.44  | 9.21E-58  | CLEC4E   | 2 | VCAN_TMo |
| 737 | 1.89E-72  | 0.459364961  | 0.798 | 0.557 | 4.11E-68  | FGR      | 2 | VCAN_TMo |
| 738 | 1.77E-89  | 0.457576733  | 0.589 | 0.231 | 3.85E-85  | MGST1    | 2 | VCAN_TMo |
| 739 | 2.54E-112 | 0.454855306  | 0.997 | 0.982 | 5.54E-108 | VIM      | 2 | VCAN_TMo |
| 740 | 6.24E-107 | 0.449427752  | 0.969 | 0.838 | 1.36E-102 | TSPO     | 2 | VCAN_TMo |
| 741 | 9.61E-52  | 0.448648591  | 0.794 | 0.591 | 2.10E-47  | FPR1     | 2 | VCAN_TMo |
| 742 | 3.80E-65  | 0.445788202  | 0.762 | 0.509 | 8.29E-61  | PTPRE    | 2 | VCAN_TMo |
| 743 | 4.06E-57  | 0.43768141   | 0.713 | 0.481 | 8.85E-53  | LTA4H    | 2 | VCAN_TMo |
| 744 | 9.38E-63  | 0.431606231  | 0.724 | 0.455 | 2.05E-58  | FLNA     | 2 | VCAN_TMo |
| 745 | 6.74E-69  | 0.428196455  | 0.951 | 0.808 | 1.47E-64  | EMP3     | 2 | VCAN_TMo |
| 746 | 2.09E-49  | 0.421733192  | 0.399 | 0.176 | 4.56E-45  | ASPH     | 2 | VCAN_TMo |
| 747 | 4.30E-75  | 0.421617396  | 0.451 | 0.164 | 9.38E-71  | ANPEP    | 2 | VCAN_TMo |
| 748 | 2.30E-71  | 0.421535751  | 0.453 | 0.16  | 5.02E-67  | ICAM3    | 2 | VCAN_TMo |

|     |           |             |       |       |           |          |   |          |
|-----|-----------|-------------|-------|-------|-----------|----------|---|----------|
| 749 | 2.22E-69  | 0.419853379 | 0.88  | 0.705 | 4.85E-65  | CORO1A   | 2 | VCAN_TMo |
| 750 | 3.66E-51  | 0.41242406  | 0.308 | 0.104 | 7.99E-47  | TRMT6    | 2 | VCAN_TMo |
| 751 | 8.88E-56  | 0.40649183  | 0.818 | 0.649 | 1.94E-51  | CD99     | 2 | VCAN_TMo |
| 752 | 1.91E-48  | 0.405199725 | 0.732 | 0.52  | 4.17E-44  | RILPL2   | 2 | VCAN_TMo |
| 753 | 9.96E-38  | 0.405171585 | 0.841 | 0.734 | 2.17E-33  | TAGLN2   | 2 | VCAN_TMo |
| 754 | 4.75E-63  | 0.403664468 | 0.875 | 0.721 | 1.04E-58  | RBM3     | 2 | VCAN_TMo |
| 755 | 2.18E-121 | 0.39960979  | 0.995 | 0.962 | 4.75E-117 | PFN1     | 2 | VCAN_TMo |
| 756 | 1.49E-81  | 0.398490605 | 0.965 | 0.856 | 3.24E-77  | CLIC1    | 2 | VCAN_TMo |
| 757 | 1.94E-38  | 0.3983794   | 0.43  | 0.231 | 4.24E-34  | PTGER2   | 2 | VCAN_TMo |
| 758 | 6.93E-54  | 0.397486491 | 0.837 | 0.677 | 1.51E-49  | ENO1     | 2 | VCAN_TMo |
| 759 | 4.42E-18  | 0.393865893 | 0.66  | 0.528 | 9.63E-14  | CXCL8    | 2 | VCAN_TMo |
| 760 | 3.54E-114 | 0.389661377 | 1     | 0.998 | 7.72E-110 | ACTB     | 2 | VCAN_TMo |
| 761 | 9.09E-67  | 0.389357398 | 0.842 | 0.63  | 1.98E-62  | MNDA     | 2 | VCAN_TMo |
| 762 | 1.33E-48  | 0.383870892 | 0.531 | 0.3   | 2.90E-44  | PNPLA2   | 2 | VCAN_TMo |
| 763 | 1.25E-54  | 0.380127607 | 0.822 | 0.645 | 2.74E-50  | APLP2    | 2 | VCAN_TMo |
| 764 | 1.03E-50  | 0.375929672 | 0.71  | 0.462 | 2.24E-46  | LSP1     | 2 | VCAN_TMo |
| 765 | 2.90E-50  | 0.373155016 | 0.547 | 0.293 | 6.31E-46  | MYO1G    | 2 | VCAN_TMo |
| 766 | 8.94E-38  | 0.371296211 | 0.747 | 0.57  | 1.95E-33  | AHNAK    | 2 | VCAN_TMo |
| 767 | 6.34E-57  | 0.368341369 | 0.935 | 0.775 | 1.38E-52  | SERPINA1 | 2 | VCAN_TMo |
| 768 | 2.21E-38  | 0.367188027 | 0.455 | 0.251 | 4.83E-34  | RNASE2   | 2 | VCAN_TMo |
| 769 | 2.70E-48  | 0.36586365  | 0.807 | 0.611 | 5.88E-44  | SLC11A1  | 2 | VCAN_TMo |
| 770 | 2.30E-34  | 0.359713707 | 0.532 | 0.322 | 5.02E-30  | HBEGF    | 2 | VCAN_TMo |
| 771 | 6.58E-39  | 0.357612849 | 0.647 | 0.438 | 1.44E-34  | TMEM176B | 2 | VCAN_TMo |
| 772 | 1.96E-83  | 0.356962218 | 0.987 | 0.914 | 4.28E-79  | COTL1    | 2 | VCAN_TMo |
| 773 | 1.24E-41  | 0.353502017 | 0.657 | 0.452 | 2.70E-37  | NCF2     | 2 | VCAN_TMo |
| 774 | 2.97E-83  | 0.352023161 | 0.99  | 0.953 | 6.48E-79  | MYL6     | 2 | VCAN_TMo |
| 775 | 2.00E-56  | 0.351460973 | 0.838 | 0.628 | 4.36E-52  | STXBP2   | 2 | VCAN_TMo |
| 776 | 8.82E-13  | 0.349102707 | 0.411 | 0.299 | 1.92E-08  | IL1R2    | 2 | VCAN_TMo |
| 777 | 6.31E-81  | 0.349030504 | 0.255 | 0.04  | 1.38E-76  | NRG1     | 2 | VCAN_TMo |
| 778 | 8.06E-71  | 0.34815715  | 0.969 | 0.904 | 1.76E-66  | ALDOA    | 2 | VCAN_TMo |
| 779 | 1.53E-30  | 0.346355741 | 0.675 | 0.517 | 3.35E-26  | UPP1     | 2 | VCAN_TMo |
| 780 | 5.14E-52  | 0.343535562 | 0.327 | 0.116 | 1.12E-47  | BST1     | 2 | VCAN_TMo |
| 781 | 1.07E-48  | 0.343433353 | 0.867 | 0.722 | 2.34E-44  | ZYX      | 2 | VCAN_TMo |
| 782 | 1.12E-48  | 0.342563667 | 0.937 | 0.833 | 2.45E-44  | IFITM2   | 2 | VCAN_TMo |
| 783 | 8.81E-37  | 0.342173542 | 0.723 | 0.513 | 1.92E-32  | ACSL1    | 2 | VCAN_TMo |
| 784 | 5.49E-51  | 0.342064739 | 0.533 | 0.256 | 1.20E-46  | SELL     | 2 | VCAN_TMo |
| 785 | 1.10E-48  | 0.341753102 | 0.817 | 0.648 | 2.40E-44  | TALDO1   | 2 | VCAN_TMo |
| 786 | 4.43E-48  | 0.340355639 | 0.431 | 0.204 | 9.66E-44  | CAPN2    | 2 | VCAN_TMo |
| 787 | 1.17E-37  | 0.340174742 | 0.857 | 0.655 | 2.56E-33  | BCL2A1   | 2 | VCAN_TMo |
| 788 | 1.91E-34  | 0.337422464 | 0.293 | 0.126 | 4.16E-30  | ANKRD28  | 2 | VCAN_TMo |
| 789 | 1.49E-39  | 0.336734996 | 0.79  | 0.603 | 3.24E-35  | TYMP     | 2 | VCAN_TMo |
| 790 | 1.16E-36  | 0.330253595 | 0.913 | 0.799 | 2.54E-32  | BTG1     | 2 | VCAN_TMo |
| 791 | 1.57E-34  | 0.323848858 | 0.653 | 0.475 | 3.42E-30  | TMEM167A | 2 | VCAN_TMo |
| 792 | 6.25E-32  | 0.321611454 | 0.945 | 0.869 | 1.36E-27  | NFKBIA   | 2 | VCAN_TMo |
| 793 | 2.25E-38  | 0.31627378  | 0.567 | 0.336 | 4.90E-34  | FAM65B   | 2 | VCAN_TMo |
| 794 | 1.06E-20  | 0.315721438 | 0.892 | 0.803 | 2.31E-16  | IFITM3   | 2 | VCAN_TMo |
| 795 | 1.19E-73  | 0.313954232 | 0.991 | 0.976 | 2.59E-69  | S100A11  | 2 | VCAN_TMo |
| 796 | 4.35E-42  | 0.313876859 | 0.902 | 0.783 | 9.48E-38  | TPM3     | 2 | VCAN_TMo |
| 797 | 9.02E-28  | 0.312918432 | 0.925 | 0.828 | 1.97E-23  | NAMPT    | 2 | VCAN_TMo |
| 798 | 4.10E-34  | 0.311847791 | 0.903 | 0.78  | 8.95E-30  | ZEB2     | 2 | VCAN_TMo |
| 799 | 5.78E-12  | 0.310940598 | 0.256 | 0.158 | 1.26E-07  | RGCC     | 2 | VCAN_TMo |
| 800 | 1.86E-26  | 0.310397094 | 0.486 | 0.322 | 4.05E-22  | AGFG1    | 2 | VCAN_TMo |
| 801 | 1.18E-22  | 0.307799651 | 0.453 | 0.304 | 2.58E-18  | CSRNP1   | 2 | VCAN_TMo |
| 802 | 1.67E-29  | 0.303197095 | 0.531 | 0.356 | 3.65E-25  | MAP2K1   | 2 | VCAN_TMo |
| 803 | 6.55E-16  | 0.303181518 | 0.723 | 0.611 | 1.43E-11  | CD52     | 2 | VCAN_TMo |
| 804 | 1.89E-28  | 0.30207523  | 0.62  | 0.464 | 4.11E-24  | SFPQ     | 2 | VCAN_TMo |
| 805 | 3.00E-38  | 0.300741916 | 0.911 | 0.795 | 6.55E-34  | ITGB2    | 2 | VCAN_TMo |
| 806 | 3.19E-65  | 0.300351596 | 0.234 | 0.045 | 6.96E-61  | FCAR     | 2 | VCAN_TMo |
| 807 | 1.10E-59  | 0.300173471 | 0.228 | 0.047 | 2.39E-55  | CCR2     | 2 | VCAN_TMo |
| 808 | 1.65E-34  | 0.299565236 | 0.6   | 0.417 | 3.60E-30  | METTL9   | 2 | VCAN_TMo |
| 809 | 1.46E-09  | 0.298242532 | 0.243 | 0.167 | 3.19E-05  | SLC39A8  | 2 | VCAN_TMo |
| 810 | 2.31E-36  | 0.297130576 | 0.612 | 0.401 | 5.05E-32  | PLBD1    | 2 | VCAN_TMo |
| 811 | 7.68E-86  | 0.296764688 | 0.996 | 0.977 | 1.67E-81  | H3F3A    | 2 | VCAN_TMo |
| 812 | 9.33E-33  | 0.295895046 | 0.378 | 0.203 | 2.03E-28  | CCDC109B | 2 | VCAN_TMo |
| 813 | 1.37E-21  | 0.295431135 | 0.344 | 0.204 | 2.99E-17  | ZC3H12A  | 2 | VCAN_TMo |
| 814 | 4.12E-40  | 0.295173219 | 0.368 | 0.168 | 8.98E-36  | PSTPIP1  | 2 | VCAN_TMo |
| 815 | 4.59E-31  | 0.294408033 | 0.554 | 0.347 | 1.00E-26  | GPR183   | 2 | VCAN_TMo |
| 816 | 7.00E-45  | 0.291787688 | 0.251 | 0.077 | 1.53E-40  | ASGR2    | 2 | VCAN_TMo |
| 817 | 2.06E-68  | 0.291430516 | 0.884 | 0.641 | 4.48E-64  | CSTA     | 2 | VCAN_TMo |
| 818 | 4.34E-43  | 0.289381482 | 0.38  | 0.171 | 9.45E-39  | CCDC69   | 2 | VCAN_TMo |
| 819 | 2.61E-26  | 0.28935781  | 0.538 | 0.384 | 5.70E-22  | FERMT3   | 2 | VCAN_TMo |
| 820 | 9.74E-30  | 0.289329197 | 0.481 | 0.3   | 2.12E-25  | C19orf38 | 2 | VCAN_TMo |
| 821 | 6.41E-43  | 0.286444854 | 0.916 | 0.812 | 1.40E-38  | FXYS5    | 2 | VCAN_TMo |
| 822 | 2.75E-90  | 0.286079424 | 0.998 | 0.99  | 6.01E-86  | TPT1     | 2 | VCAN_TMo |
| 823 | 1.67E-39  | 0.286016229 | 0.778 | 0.61  | 3.63E-35  | PGD      | 2 | VCAN_TMo |

|     |          |              |       |       |             |               |   |          |
|-----|----------|--------------|-------|-------|-------------|---------------|---|----------|
| 824 | 3.46E-26 | 0.285577999  | 0.637 | 0.484 | 7.55E-22    | SRSF2         | 2 | VCAN_TMo |
| 825 | 2.16E-29 | 0.285064277  | 0.689 | 0.535 | 4.71E-25    | AGTRAP        | 2 | VCAN_TMo |
| 826 | 6.10E-34 | 0.284577372  | 0.818 | 0.661 | 1.33E-29    | CD44          | 2 | VCAN_TMo |
| 827 | 7.76E-35 | 0.28382713   | 0.871 | 0.767 | 1.69E-30    | HNRNPA1       | 2 | VCAN_TMo |
| 828 | 8.44E-32 | 0.282873305  | 0.418 | 0.236 | 1.84E-27    | ASGR1         | 2 | VCAN_TMo |
| 829 | 2.88E-22 | 0.2823638    | 0.713 | 0.548 | 6.27E-18    | IER3          | 2 | VCAN_TMo |
| 830 | 5.91E-23 | 0.280283702  | 0.467 | 0.317 | 1.29E-18    | ODF3B         | 2 | VCAN_TMo |
| 831 | 1.36E-25 | 0.278447305  | 0.586 | 0.396 | 2.96E-21    | GK            | 2 | VCAN_TMo |
| 832 | 1.51E-49 | 0.278298991  | 0.998 | 0.97  | 3.29E-45    | NEAT1         | 2 | VCAN_TMo |
| 833 | 3.23E-26 | 0.277973548  | 0.419 | 0.26  | 7.05E-22    | PLIN3         | 2 | VCAN_TMo |
| 834 | 3.75E-67 | 0.276956086  | 0.994 | 0.953 | 8.19E-63    | RPS9          | 2 | VCAN_TMo |
| 835 | 2.03E-27 | 0.276127968  | 0.546 | 0.377 | 4.43E-23    | EFHD2         | 2 | VCAN_TMo |
| 836 | 5.63E-26 | 0.276109798  | 0.513 | 0.335 | 1.23E-21    | TMEM176A      | 2 | VCAN_TMo |
| 837 | 4.65E-21 | 0.276106407  | 0.445 | 0.297 | 1.01E-16    | PNP           | 2 | VCAN_TMo |
| 838 | 2.49E-27 | 0.275975023  | 0.472 | 0.311 | 5.42E-23    | NUMB          | 2 | VCAN_TMo |
| 839 | 2.15E-26 | 0.273861068  | 0.612 | 0.454 | 4.68E-22    | CSF3R         | 2 | VCAN_TMo |
| 840 | 4.34E-44 | 0.273383924  | 0.438 | 0.205 | 9.47E-40    | RP11-1143G9.4 | 2 | VCAN_TMo |
| 841 | 5.67E-34 | 0.272488983  | 0.281 | 0.116 | 1.24E-29    | F13A1         | 2 | VCAN_TMo |
| 842 | 1.33E-20 | 0.272049467  | 0.446 | 0.307 | 2.89E-16    | KLF10         | 2 | VCAN_TMo |
| 843 | 1.26E-31 | 0.271705621  | 0.75  | 0.605 | 2.75E-27    | CAST          | 2 | VCAN_TMo |
| 844 | 4.32E-18 | 0.271461459  | 0.557 | 0.425 | 9.43E-14    | FCGR1A        | 2 | VCAN_TMo |
| 845 | 4.19E-26 | 0.26990994   | 0.63  | 0.478 | 9.14E-22    | ROCK1         | 2 | VCAN_TMo |
| 846 | 3.87E-22 | 0.269584583  | 0.531 | 0.368 | 8.43E-18    | EZR           | 2 | VCAN_TMo |
| 847 | 1.19E-27 | 0.267185382  | 0.627 | 0.471 | 2.60E-23    | C20orf24      | 2 | VCAN_TMo |
| 848 | 5.42E-16 | 0.264979796  | 0.386 | 0.271 | 1.18E-11    | FBP1          | 2 | VCAN_TMo |
| 849 | 1.25E-21 | 0.264289957  | 0.472 | 0.33  | 2.72E-17    | AHR           | 2 | VCAN_TMo |
| 850 | 2.40E-24 | 0.261339865  | 0.541 | 0.382 | 5.24E-20    | IRS2          | 2 | VCAN_TMo |
| 851 | 3.25E-22 | 0.261240669  | 0.608 | 0.466 | 7.10E-18    | VASP          | 2 | VCAN_TMo |
| 852 | 1.60E-34 | 0.260643865  | 0.947 | 0.857 | 3.48E-30    | RPL10A        | 2 | VCAN_TMo |
| 853 | 2.16E-37 | 0.260567065  | 0.344 | 0.148 | 4.70E-33    | CKAP4         | 2 | VCAN_TMo |
| 854 | 8.69E-21 | 0.260523278  | 0.368 | 0.221 | 1.90E-16    | FPR2          | 2 | VCAN_TMo |
| 855 | 1.59E-28 | 0.259076651  | 0.874 | 0.778 | 3.46E-24    | SPI1          | 2 | VCAN_TMo |
| 856 | 1.55E-26 | 0.258877316  | 0.361 | 0.206 | 3.39E-22    | SASH3         | 2 | VCAN_TMo |
| 857 | 1.65E-26 | 0.258145897  | 0.491 | 0.308 | 3.61E-22    | RP11-670E13.6 | 2 | VCAN_TMo |
| 858 | 8.75E-25 | 0.258088266  | 0.566 | 0.404 | 1.91E-20    | GPCPD1        | 2 | VCAN_TMo |
| 859 | 2.78E-29 | 0.256166556  | 0.384 | 0.203 | 6.06E-25    | CD36          | 2 | VCAN_TMo |
| 860 | 4.36E-28 | 0.255242184  | 0.578 | 0.406 | 9.51E-24    | FBXL5         | 2 | VCAN_TMo |
| 861 | 9.57E-12 | 0.254900777  | 0.281 | 0.177 | 2.09E-07    | TNFAIP6       | 2 | VCAN_TMo |
| 862 | 1.34E-24 | 0.253777648  | 0.894 | 0.798 | 2.93E-20    | TKT           | 2 | VCAN_TMo |
| 863 | 1.13E-27 | 0.253606231  | 0.42  | 0.254 | 2.46E-23    | FMNL1         | 2 | VCAN_TMo |
| 864 | 1.09E-28 | 0.253556653  | 0.912 | 0.808 | 2.37E-24    | RPL4          | 2 | VCAN_TMo |
| 865 | 4.42E-11 | 0.252477115  | 0.139 | 0.069 | 9.65E-07    | CCL20         | 2 | VCAN_TMo |
| 866 | 6.89E-27 | 0.251516911  | 0.688 | 0.521 | 1.50E-22    | CD48          | 2 | VCAN_TMo |
| 867 | 4.33E-31 | 0.251157018  | 0.853 | 0.717 | 9.44E-27    | SUB1          | 2 | VCAN_TMo |
| 868 | 1.23E-14 | 0.250212675  | 0.458 | 0.347 | 2.67E-10    | BACH1         | 2 | VCAN_TMo |
| 869 | 1.31E-24 | -0.252126478 | 0.442 | 0.622 | 2.86E-20    | CTSL          | 2 | VCAN_TMo |
| 870 | 8.99E-13 | -0.254169377 | 0.352 | 0.471 | 1.96E-08    | GIMAP4        | 2 | VCAN_TMo |
| 871 | 5.67E-09 | -0.254989833 | 0.618 | 0.655 | 0.000123686 | TXNIP         | 2 | VCAN_TMo |
| 872 | 4.75E-23 | -0.255736609 | 0.131 | 0.291 | 1.04E-18    | FCHO2         | 2 | VCAN_TMo |
| 873 | 2.48E-18 | -0.25609319  | 0.882 | 0.882 | 5.42E-14    | LST1          | 2 | VCAN_TMo |
| 874 | 5.16E-15 | -0.256903943 | 0.612 | 0.689 | 1.12E-10    | LY96          | 2 | VCAN_TMo |
| 875 | 1.14E-10 | -0.257102406 | 0.379 | 0.487 | 2.49E-06    | SOD1          | 2 | VCAN_TMo |
| 876 | 4.99E-16 | -0.260352301 | 0.943 | 0.884 | 1.09E-11    | CD163         | 2 | VCAN_TMo |
| 877 | 3.48E-25 | -0.261992285 | 0.122 | 0.289 | 7.59E-21    | TMC6          | 2 | VCAN_TMo |
| 878 | 3.46E-29 | -0.2653376   | 0.998 | 0.989 | 7.55E-25    | MT-ATP6       | 2 | VCAN_TMo |
| 879 | 2.79E-20 | -0.266320196 | 0.105 | 0.242 | 6.09E-16    | P4HA1         | 2 | VCAN_TMo |
| 880 | 8.85E-11 | -0.267844825 | 0.687 | 0.716 | 1.93E-06    | HERPUD1       | 2 | VCAN_TMo |
| 881 | 8.02E-19 | -0.269028274 | 0.449 | 0.589 | 1.75E-14    | TMEM123       | 2 | VCAN_TMo |
| 882 | 1.12E-18 | -0.269351585 | 0.283 | 0.441 | 2.44E-14    | CD300A        | 2 | VCAN_TMo |
| 883 | 3.27E-25 | -0.270449704 | 0.148 | 0.322 | 7.13E-21    | SIGLEC7       | 2 | VCAN_TMo |
| 884 | 4.78E-17 | -0.272375797 | 0.362 | 0.508 | 1.04E-12    | LAMP2         | 2 | VCAN_TMo |
| 885 | 1.35E-20 | -0.273289317 | 0.264 | 0.43  | 2.95E-16    | DDAH2         | 2 | VCAN_TMo |
| 886 | 2.48E-14 | -0.275690455 | 0.416 | 0.538 | 5.41E-10    | LAMP1         | 2 | VCAN_TMo |
| 887 | 1.51E-17 | -0.276209045 | 0.291 | 0.443 | 3.28E-13    | GYPC          | 2 | VCAN_TMo |
| 888 | 1.36E-25 | -0.278323061 | 0.143 | 0.313 | 2.96E-21    | DNPH1         | 2 | VCAN_TMo |
| 889 | 1.73E-20 | -0.278862869 | 0.824 | 0.804 | 3.77E-16    | HCLS1         | 2 | VCAN_TMo |
| 890 | 2.46E-18 | -0.281610748 | 0.786 | 0.782 | 5.37E-14    | BLVRB         | 2 | VCAN_TMo |
| 891 | 9.75E-21 | -0.28207863  | 0.282 | 0.451 | 2.13E-16    | TMEM14C       | 2 | VCAN_TMo |
| 892 | 5.11E-24 | -0.282094044 | 0.161 | 0.332 | 1.11E-19    | GLMP          | 2 | VCAN_TMo |
| 893 | 4.42E-21 | -0.285909411 | 0.153 | 0.305 | 9.64E-17    | AP2A2         | 2 | VCAN_TMo |
| 894 | 2.44E-19 | -0.286696386 | 0.946 | 0.918 | 5.31E-15    | MT-ATP8       | 2 | VCAN_TMo |
| 895 | 1.16E-20 | -0.286859188 | 0.225 | 0.389 | 2.53E-16    | CISD2         | 2 | VCAN_TMo |
| 896 | 5.10E-24 | -0.288842259 | 0.757 | 0.816 | 1.11E-19    | CD302         | 2 | VCAN_TMo |
| 897 | 8.38E-23 | -0.289899914 | 0.761 | 0.766 | 1.83E-18    | SARAF         | 2 | VCAN_TMo |
| 898 | 3.18E-12 | -0.29060177  | 0.889 | 0.857 | 6.93E-08    | KLF6          | 2 | VCAN_TMo |

|     |           |              |       |       |             |          |   |          |
|-----|-----------|--------------|-------|-------|-------------|----------|---|----------|
| 899 | 7.38E-11  | -0.292490421 | 0.329 | 0.44  | 1.61E-06    | PELI1    | 2 | VCAN_TMo |
| 900 | 2.62E-20  | -0.298714179 | 0.228 | 0.384 | 5.72E-16    | IDH1     | 2 | VCAN_TMo |
| 901 | 1.60E-20  | -0.300871743 | 0.121 | 0.264 | 3.48E-16    | ARRDC3   | 2 | VCAN_TMo |
| 902 | 3.34E-16  | -0.301856277 | 0.323 | 0.456 | 7.29E-12    | NPL      | 2 | VCAN_TMo |
| 903 | 3.45E-20  | -0.303780336 | 0.292 | 0.455 | 7.53E-16    | PRCP     | 2 | VCAN_TMo |
| 904 | 2.43E-10  | -0.304246722 | 0.119 | 0.207 | 5.30E-06    | TWISTNB  | 2 | VCAN_TMo |
| 905 | 6.09E-20  | -0.311273655 | 0.417 | 0.557 | 1.33E-15    | ST13     | 2 | VCAN_TMo |
| 906 | 5.64E-18  | -0.312082937 | 0.341 | 0.476 | 1.23E-13    | TCN2     | 2 | VCAN_TMo |
| 907 | 7.09E-17  | -0.31264921  | 0.85  | 0.822 | 1.55E-12    | GLUL     | 2 | VCAN_TMo |
| 908 | 3.18E-26  | -0.313031028 | 0.185 | 0.369 | 6.93E-22    | DAPK1    | 2 | VCAN_TMo |
| 909 | 3.22E-17  | -0.316444344 | 0.4   | 0.534 | 7.03E-13    | PRNP     | 2 | VCAN_TMo |
| 910 | 1.67E-27  | -0.316845131 | 0.202 | 0.39  | 3.65E-23    | PEBP1    | 2 | VCAN_TMo |
| 911 | 1.44E-20  | -0.319411669 | 0.564 | 0.65  | 3.14E-16    | TPP1     | 2 | VCAN_TMo |
| 912 | 4.53E-26  | -0.327315033 | 0.227 | 0.415 | 9.88E-22    | SIGLEC10 | 2 | VCAN_TMo |
| 913 | 2.82E-78  | -0.328671688 | 1     | 0.998 | 6.14E-74    | MT-CO2   | 2 | VCAN_TMo |
| 914 | 8.75E-23  | -0.329121451 | 0.297 | 0.466 | 1.91E-18    | RASSF4   | 2 | VCAN_TMo |
| 915 | 1.20E-12  | -0.333537744 | 0.649 | 0.717 | 2.62E-08    | HSP90B1  | 2 | VCAN_TMo |
| 916 | 1.94E-20  | -0.336112847 | 0.224 | 0.384 | 4.22E-16    | CACYBP   | 2 | VCAN_TMo |
| 917 | 2.82E-26  | -0.337099942 | 0.384 | 0.559 | 6.14E-22    | DRAM2    | 2 | VCAN_TMo |
| 918 | 2.90E-31  | -0.342095609 | 0.161 | 0.352 | 6.32E-27    | CRYL1    | 2 | VCAN_TMo |
| 919 | 2.38E-23  | -0.345929707 | 0.32  | 0.479 | 5.20E-19    | HLA-DMB  | 2 | VCAN_TMo |
| 920 | 1.08E-29  | -0.352516219 | 0.662 | 0.751 | 2.35E-25    | MFSD1    | 2 | VCAN_TMo |
| 921 | 1.41E-41  | -0.35360838  | 0.987 | 0.962 | 3.08E-37    | MT-ND4L  | 2 | VCAN_TMo |
| 922 | 1.36E-28  | -0.354695918 | 0.333 | 0.527 | 2.96E-24    | SNX5     | 2 | VCAN_TMo |
| 923 | 9.44E-23  | -0.359702192 | 0.479 | 0.606 | 2.06E-18    | SNX6     | 2 | VCAN_TMo |
| 924 | 1.82E-27  | -0.360040759 | 0.22  | 0.402 | 3.97E-23    | HEXA     | 2 | VCAN_TMo |
| 925 | 1.10E-12  | -0.362448476 | 0.744 | 0.757 | 2.40E-08    | HSP90AB1 | 2 | VCAN_TMo |
| 926 | 6.17E-27  | -0.363250972 | 0.186 | 0.365 | 1.35E-22    | DNASE2   | 2 | VCAN_TMo |
| 927 | 2.05E-29  | -0.371385104 | 0.236 | 0.426 | 4.48E-25    | ADAP2    | 2 | VCAN_TMo |
| 928 | 1.01E-20  | -0.37282799  | 0.396 | 0.548 | 2.21E-16    | CLEC2B   | 2 | VCAN_TMo |
| 929 | 5.73E-26  | -0.377613695 | 0.153 | 0.323 | 1.25E-21    | P2RY13   | 2 | VCAN_TMo |
| 930 | 3.57E-32  | -0.379427238 | 0.204 | 0.412 | 7.78E-28    | SLC1A3   | 2 | VCAN_TMo |
| 931 | 9.85E-25  | -0.379783559 | 0.741 | 0.783 | 2.15E-20    | WSB1     | 2 | VCAN_TMo |
| 932 | 1.41E-36  | -0.380860358 | 0.129 | 0.34  | 3.07E-32    | ACP5     | 2 | VCAN_TMo |
| 933 | 4.97E-08  | -0.381799665 | 0.151 | 0.229 | 0.001084857 | ZFAND2A  | 2 | VCAN_TMo |
| 934 | 2.79E-40  | -0.391780816 | 0.978 | 0.926 | 6.09E-36    | PSAP     | 2 | VCAN_TMo |
| 935 | 8.90E-37  | -0.392217025 | 0.139 | 0.35  | 1.94E-32    | TCF7L2   | 2 | VCAN_TMo |
| 936 | 9.80E-38  | -0.393560188 | 0.23  | 0.458 | 2.14E-33    | CD4      | 2 | VCAN_TMo |
| 937 | 6.09E-21  | -0.396727898 | 0.584 | 0.663 | 1.33E-16    | IGSF6    | 2 | VCAN_TMo |
| 938 | 6.52E-25  | -0.40715504  | 0.618 | 0.706 | 1.42E-20    | UBB      | 2 | VCAN_TMo |
| 939 | 7.39E-42  | -0.414287677 | 0.817 | 0.826 | 1.61E-37    | ASAH1    | 2 | VCAN_TMo |
| 940 | 1.18E-45  | -0.419906409 | 0.128 | 0.368 | 2.58E-41    | FRMD4B   | 2 | VCAN_TMo |
| 941 | 5.71E-38  | -0.421249801 | 0.125 | 0.34  | 1.24E-33    | CD81     | 2 | VCAN_TMo |
| 942 | 5.83E-41  | -0.425114325 | 0.226 | 0.457 | 1.27E-36    | TECR     | 2 | VCAN_TMo |
| 943 | 3.90E-57  | -0.427088842 | 0.876 | 0.846 | 8.51E-53    | HLA-E    | 2 | VCAN_TMo |
| 944 | 2.50E-38  | -0.429233159 | 0.253 | 0.478 | 5.44E-34    | SCARB2   | 2 | VCAN_TMo |
| 945 | 7.44E-40  | -0.429851223 | 0.458 | 0.638 | 1.62E-35    | CHCHD10  | 2 | VCAN_TMo |
| 946 | 6.51E-26  | -0.430329647 | 0.728 | 0.792 | 1.42E-21    | RHOB     | 2 | VCAN_TMo |
| 947 | 5.96E-33  | -0.430490677 | 0.575 | 0.676 | 1.30E-28    | HLA-DMA  | 2 | VCAN_TMo |
| 948 | 2.18E-29  | -0.437464281 | 0.64  | 0.739 | 4.75E-25    | FGL2     | 2 | VCAN_TMo |
| 949 | 4.03E-42  | -0.439190767 | 0.408 | 0.609 | 8.79E-38    | CXCL16   | 2 | VCAN_TMo |
| 950 | 1.22E-16  | -0.441201567 | 0.18  | 0.306 | 2.66E-12    | PAPSS2   | 2 | VCAN_TMo |
| 951 | 1.59E-30  | -0.453424214 | 0.739 | 0.775 | 3.48E-26    | HSPA8    | 2 | VCAN_TMo |
| 952 | 4.48E-22  | -0.459392013 | 0.566 | 0.655 | 9.78E-18    | NINJ1    | 2 | VCAN_TMo |
| 953 | 3.02E-46  | -0.463000095 | 0.124 | 0.364 | 6.58E-42    | CD84     | 2 | VCAN_TMo |
| 954 | 1.32E-38  | -0.471649783 | 0.135 | 0.35  | 2.88E-34    | GLO1     | 2 | VCAN_TMo |
| 955 | 1.72E-37  | -0.49028254  | 0.288 | 0.504 | 3.76E-33    | STOM     | 2 | VCAN_TMo |
| 956 | 1.93E-21  | -0.497010616 | 0.757 | 0.766 | 4.22E-17    | GADD45B  | 2 | VCAN_TMo |
| 957 | 2.15E-51  | -0.499467906 | 0.179 | 0.441 | 4.68E-47    | MSR1     | 2 | VCAN_TMo |
| 958 | 7.47E-37  | -0.502940505 | 0.545 | 0.665 | 1.63E-32    | CECR1    | 2 | VCAN_TMo |
| 959 | 9.98E-94  | -0.503502541 | 1     | 0.999 | 2.18E-89    | FTL      | 2 | VCAN_TMo |
| 960 | 3.69E-42  | -0.510485531 | 0.279 | 0.505 | 8.05E-38    | IL18     | 2 | VCAN_TMo |
| 961 | 6.17E-50  | -0.522607896 | 0.149 | 0.402 | 1.35E-45    | DAB2     | 2 | VCAN_TMo |
| 962 | 2.00E-53  | -0.52622381  | 0.151 | 0.411 | 4.37E-49    | MERTK    | 2 | VCAN_TMo |
| 963 | 2.65E-50  | -0.533092867 | 0.92  | 0.875 | 5.79E-46    | CTSB     | 2 | VCAN_TMo |
| 964 | 3.76E-10  | -0.541276664 | 0.146 | 0.239 | 8.21E-06    | HSPA6    | 2 | VCAN_TMo |
| 965 | 1.33E-96  | -0.55638206  | 0.943 | 0.926 | 2.91E-92    | ITM2B    | 2 | VCAN_TMo |
| 966 | 9.10E-57  | -0.576780677 | 0.941 | 0.883 | 1.98E-52    | HLA-DRB1 | 2 | VCAN_TMo |
| 967 | 3.42E-44  | -0.580721324 | 0.613 | 0.722 | 7.45E-40    | HMOX1    | 2 | VCAN_TMo |
| 968 | 1.91E-116 | -0.586614441 | 0.999 | 0.99  | 4.17E-112   | CST3     | 2 | VCAN_TMo |
| 969 | 7.42E-51  | -0.590245568 | 0.777 | 0.804 | 1.62E-46    | FCGRT    | 2 | VCAN_TMo |
| 970 | 1.40E-100 | -0.602305419 | 0.931 | 0.9   | 3.05E-96    | NPC2     | 2 | VCAN_TMo |
| 971 | 1.04E-21  | -0.606093788 | 0.441 | 0.591 | 2.26E-17    | HSPE1    | 2 | VCAN_TMo |
| 972 | 1.22E-53  | -0.632356564 | 0.278 | 0.527 | 2.66E-49    | MCOLN1   | 2 | VCAN_TMo |
| 973 | 2.19E-28  | -0.632604472 | 0.826 | 0.833 | 4.77E-24    | HSP90AA1 | 2 | VCAN_TMo |

|      |           |              |       |       |             |               |   |            |
|------|-----------|--------------|-------|-------|-------------|---------------|---|------------|
| 974  | 1.16E-67  | -0.634932387 | 0.101 | 0.395 | 2.52E-63    | GPR34         | 2 | VCAN_TMo   |
| 975  | 1.20E-47  | -0.638383477 | 0.418 | 0.625 | 2.63E-43    | RBP7          | 2 | VCAN_TMo   |
| 976  | 5.19E-68  | -0.668226288 | 0.177 | 0.483 | 1.13E-63    | ABCA1         | 2 | VCAN_TMo   |
| 977  | 6.84E-39  | -0.669761707 | 0.332 | 0.549 | 1.49E-34    | HSPA1B        | 2 | VCAN_TMo   |
| 978  | 9.09E-77  | -0.684572845 | 0.165 | 0.48  | 1.98E-72    | TSPAN4        | 2 | VCAN_TMo   |
| 979  | 7.66E-96  | -0.696069504 | 0.683 | 0.79  | 1.67E-91    | RNASET2       | 2 | VCAN_TMo   |
| 980  | 2.31E-78  | -0.70450325  | 0.963 | 0.909 | 5.03E-74    | HLA-DRA       | 2 | VCAN_TMo   |
| 981  | 2.00E-18  | -0.715625851 | 0.416 | 0.544 | 4.37E-14    | HSPD1         | 2 | VCAN_TMo   |
| 982  | 2.19E-14  | -0.718297171 | 0.404 | 0.502 | 4.77E-10    | CCL3          | 2 | VCAN_TMo   |
| 983  | 1.19E-23  | -0.728212181 | 0.463 | 0.579 | 2.58E-19    | DNAJB1        | 2 | VCAN_TMo   |
| 984  | 1.50E-76  | -0.733359141 | 0.335 | 0.613 | 3.27E-72    | CSF1R         | 2 | VCAN_TMo   |
| 985  | 2.35E-79  | -0.743985961 | 0.145 | 0.473 | 5.12E-75    | MAF           | 2 | VCAN_TMo   |
| 986  | 1.73E-62  | -0.748072444 | 0.554 | 0.697 | 3.77E-58    | CREG1         | 2 | VCAN_TMo   |
| 987  | 1.20E-38  | -0.748190303 | 0.532 | 0.702 | 2.61E-34    | JUN           | 2 | VCAN_TMo   |
| 988  | 2.17E-107 | -0.756433061 | 0.904 | 0.882 | 4.73E-103   | CD68          | 2 | VCAN_TMo   |
| 989  | 1.57E-88  | -0.788289486 | 0.145 | 0.491 | 3.43E-84    | SMPDL3A       | 2 | VCAN_TMo   |
| 990  | 6.74E-103 | -0.790049659 | 0.846 | 0.877 | 1.47E-98    | MS4A6A        | 2 | VCAN_TMo   |
| 991  | 1.38E-104 | -0.806134222 | 0.991 | 0.971 | 3.00E-100   | CD74          | 2 | VCAN_TMo   |
| 992  | 2.49E-71  | -0.818613262 | 0.301 | 0.586 | 5.44E-67    | VSIG4         | 2 | VCAN_TMo   |
| 993  | 8.74E-74  | -0.820908502 | 0.28  | 0.564 | 1.91E-69    | CPM           | 2 | VCAN_TMo   |
| 994  | 1.19E-08  | -0.82317508  | 0.206 | 0.286 | 0.000259657 | RNASE1        | 2 | VCAN_TMo   |
| 995  | 9.04E-84  | -0.829520989 | 0.615 | 0.756 | 1.97E-79    | HLA-DQB1      | 2 | VCAN_TMo   |
| 996  | 4.70E-34  | -0.83018853  | 0.248 | 0.448 | 1.02E-29    | HSPH1         | 2 | VCAN_TMo   |
| 997  | 1.38E-112 | -0.876884209 | 0.248 | 0.624 | 3.01E-108   | FAM26F        | 2 | VCAN_TMo   |
| 998  | 3.57E-90  | -0.883825209 | 0.531 | 0.722 | 7.79E-86    | CTSC          | 2 | VCAN_TMo   |
| 999  | 4.88E-53  | -0.926804487 | 0.193 | 0.444 | 1.06E-48    | PDK4          | 2 | VCAN_TMo   |
| 1000 | 2.43E-24  | -0.953391417 | 0.368 | 0.513 | 5.29E-20    | CCL4          | 2 | VCAN_TMo   |
| 1001 | 4.45E-53  | -0.973199855 | 0.559 | 0.72  | 9.70E-49    | HSPA1A        | 2 | VCAN_TMo   |
| 1002 | 7.57E-38  | -1.045853288 | 0.247 | 0.431 | 1.65E-33    | MARCO         | 2 | VCAN_TMo   |
| 1003 | 4.57E-54  | -1.068032477 | 0.249 | 0.512 | 9.98E-50    | HSPB1         | 2 | VCAN_TMo   |
| 1004 | 1.97E-117 | -1.076862665 | 0.729 | 0.807 | 4.30E-113   | HLA-DPA1      | 2 | VCAN_TMo   |
| 1005 | 1.52E-111 | -1.088124009 | 0.664 | 0.778 | 3.30E-107   | HLA-DPB1      | 2 | VCAN_TMo   |
| 1006 | 3.35E-127 | -1.094379501 | 0.722 | 0.827 | 7.32E-123   | HLA-DRB5      | 2 | VCAN_TMo   |
| 1007 | 1.93E-124 | -1.104316006 | 0.497 | 0.745 | 4.20E-120   | MS4A7         | 2 | VCAN_TMo   |
| 1008 | 1.86E-148 | -1.23978754  | 0.282 | 0.684 | 4.05E-144   | FCGR3A        | 2 | VCAN_TMo   |
| 1009 | 2.80E-145 | -1.300041344 | 0.311 | 0.694 | 6.10E-141   | MS4A4A        | 2 | VCAN_TMo   |
| 1010 | 7.86E-34  | -1.351067461 | 0.216 | 0.407 | 1.71E-29    | CCL4L2        | 2 | VCAN_TMo   |
| 1011 | 1.03E-114 | -1.352710924 | 0.507 | 0.726 | 2.24E-110   | LIPA          | 2 | VCAN_TMo   |
| 1012 | 3.84E-164 | -1.464895493 | 0.197 | 0.664 | 8.37E-160   | HLA-DQA1      | 2 | VCAN_TMo   |
| 1013 | 2.11E-224 | -2.691256563 | 0.147 | 0.705 | 4.60E-220   | C1QA          | 2 | VCAN_TMo   |
| 1014 | 2.57E-228 | -2.914268973 | 0.11  | 0.692 | 5.60E-224   | C1QC          | 2 | VCAN_TMo   |
| 1015 | 9.94E-231 | -3.038857252 | 0.103 | 0.692 | 2.17E-226   | C1QB          | 2 | VCAN_TMo   |
| 1016 | 5.65E-285 | 2.059592112  | 0.998 | 0.709 | 1.23E-280   | S100A8        | 3 | S100A8_TMo |
| 1017 | 6.01E-260 | 2.051188953  | 0.95  | 0.401 | 1.31E-255   | S100A12       | 3 | S100A8_TMo |
| 1018 | 5.88E-74  | 1.365784058  | 0.347 | 0.094 | 1.28E-69    | RETN          | 3 | S100A8_TMo |
| 1019 | 8.90E-175 | 1.304977041  | 0.727 | 0.235 | 1.94E-170   | ALOX5AP       | 3 | S100A8_TMo |
| 1020 | 1.13E-156 | 1.131735217  | 0.986 | 0.862 | 2.47E-152   | S100A9        | 3 | S100A8_TMo |
| 1021 | 1.44E-97  | 1.095102324  | 0.611 | 0.272 | 3.15E-93    | SELL          | 3 | S100A8_TMo |
| 1022 | 3.24E-222 | 1.075605633  | 1     | 0.892 | 7.06E-218   | S100A6        | 3 | S100A8_TMo |
| 1023 | 1.41E-116 | 1.014716251  | 0.847 | 0.679 | 3.07E-112   | CSTA          | 3 | S100A8_TMo |
| 1024 | 9.70E-193 | 1.014701498  | 0.989 | 0.96  | 2.12E-188   | LYZ           | 3 | S100A8_TMo |
| 1025 | 1.47E-136 | 1.014293568  | 0.89  | 0.451 | 3.21E-132   | VCAN          | 3 | S100A8_TMo |
| 1026 | 2.65E-99  | 1.007964435  | 0.824 | 0.725 | 5.77E-95    | GCA           | 3 | S100A8_TMo |
| 1027 | 3.89E-75  | 1.003803605  | 0.646 | 0.419 | 8.48E-71    | PLBD1         | 3 | S100A8_TMo |
| 1028 | 1.04E-80  | 0.99197916   | 0.79  | 0.664 | 2.27E-76    | STXBP2        | 3 | S100A8_TMo |
| 1029 | 3.90E-104 | 0.991025894  | 0.824 | 0.66  | 8.50E-100   | MNDA          | 3 | S100A8_TMo |
| 1030 | 2.48E-62  | 0.923464062  | 0.467 | 0.213 | 5.41E-58    | CDA           | 3 | S100A8_TMo |
| 1031 | 5.36E-161 | 0.892124448  | 0.986 | 0.872 | 1.17E-156   | S100A4        | 3 | S100A8_TMo |
| 1032 | 7.42E-35  | 0.823425713  | 0.477 | 0.298 | 1.62E-30    | IL1R2         | 3 | S100A8_TMo |
| 1033 | 3.46E-54  | 0.812533854  | 0.45  | 0.203 | 7.54E-50    | MCEMP1        | 3 | S100A8_TMo |
| 1034 | 2.97E-92  | 0.768372686  | 0.869 | 0.822 | 6.47E-88    | SERPINB1      | 3 | S100A8_TMo |
| 1035 | 4.98E-121 | 0.766665857  | 0.961 | 0.856 | 1.08E-116   | S100A10       | 3 | S100A8_TMo |
| 1036 | 3.24E-23  | 0.76066732   | 0.378 | 0.247 | 7.06E-19    | RP11-1143G9.4 | 3 | S100A8_TMo |
| 1037 | 1.23E-49  | 0.758087162  | 0.515 | 0.291 | 2.68E-45    | MGST1         | 3 | S100A8_TMo |
| 1038 | 3.76E-36  | 0.755953383  | 0.601 | 0.504 | 8.21E-32    | HMGB2         | 3 | S100A8_TMo |
| 1039 | 8.61E-162 | 0.744947925  | 0.992 | 0.981 | 1.88E-157   | GAPDH         | 3 | S100A8_TMo |
| 1040 | 1.52E-49  | 0.714904548  | 0.701 | 0.648 | 3.31E-45    | PGD           | 3 | S100A8_TMo |
| 1041 | 3.20E-32  | 0.675332882  | 0.341 | 0.173 | 6.98E-28    | CKAP4         | 3 | S100A8_TMo |
| 1042 | 2.49E-99  | 0.669358089  | 0.91  | 0.867 | 5.43E-95    | TSPO          | 3 | S100A8_TMo |
| 1043 | 4.35E-23  | 0.66651734   | 0.327 | 0.179 | 9.49E-19    | TNFAIP6       | 3 | S100A8_TMo |
| 1044 | 1.69E-43  | 0.659335997  | 0.266 | 0.086 | 3.69E-39    | CES1          | 3 | S100A8_TMo |
| 1045 | 3.12E-29  | 0.65612925   | 0.323 | 0.166 | 6.81E-25    | EMB           | 3 | S100A8_TMo |
| 1046 | 2.34E-175 | 0.641714114  | 0.998 | 0.997 | 5.11E-171   | RPL39         | 3 | S100A8_TMo |
| 1047 | 1.93E-34  | 0.64155963   | 0.153 | 0.036 | 4.21E-30    | CST7          | 3 | S100A8_TMo |
| 1048 | 5.26E-34  | 0.636831765  | 0.533 | 0.377 | 1.15E-29    | PLP2          | 3 | S100A8_TMo |



|      |           |             |       |       |             |             |   |            |
|------|-----------|-------------|-------|-------|-------------|-------------|---|------------|
| 1049 | 1.52E-21  | 0.632034651 | 0.482 | 0.383 | 3.32E-17    | FAM65B      | 3 | S100A8_TMo |
| 1050 | 9.83E-64  | 0.631833151 | 0.833 | 0.598 | 2.14E-59    | FCN1        | 3 | S100A8_TMo |
| 1051 | 4.13E-14  | 0.595256755 | 0.293 | 0.195 | 9.01E-10    | CYP1B1      | 3 | S100A8_TMo |
| 1052 | 1.15E-28  | 0.595170344 | 0.149 | 0.04  | 2.52E-24    | S100P       | 3 | S100A8_TMo |
| 1053 | 1.57E-23  | 0.58799584  | 0.495 | 0.394 | 3.43E-19    | GLIPR2      | 3 | S100A8_TMo |
| 1054 | 1.01E-21  | 0.586729109 | 0.303 | 0.172 | 2.21E-17    | MEGF9       | 3 | S100A8_TMo |
| 1055 | 5.42E-27  | 0.575874    | 0.631 | 0.569 | 1.18E-22    | LILRA5      | 3 | S100A8_TMo |
| 1056 | 9.65E-17  | 0.573251395 | 0.495 | 0.463 | 2.11E-12    | METTL9      | 3 | S100A8_TMo |
| 1057 | 1.36E-34  | 0.570196126 | 0.682 | 0.699 | 2.97E-30    | TALDO1      | 3 | S100A8_TMo |
| 1058 | 2.72E-27  | 0.566591594 | 0.492 | 0.343 | 5.92E-23    | CAPG        | 3 | S100A8_TMo |
| 1059 | 3.74E-63  | 0.564612324 | 0.896 | 0.878 | 8.15E-59    | LGALS1      | 3 | S100A8_TMo |
| 1060 | 9.53E-14  | 0.561175983 | 0.423 | 0.352 | 2.08E-09    | NCF1        | 3 | S100A8_TMo |
| 1061 | 2.38E-25  | 0.558910785 | 0.366 | 0.215 | 5.18E-21    | ICAM3       | 3 | S100A8_TMo |
| 1062 | 2.06E-22  | 0.557881805 | 0.255 | 0.124 | 4.49E-18    | RP6-159A1.4 | 3 | S100A8_TMo |
| 1063 | 1.02E-13  | 0.537478081 | 0.476 | 0.45  | 2.23E-09    | FBXL5       | 3 | S100A8_TMo |
| 1064 | 1.29E-133 | 0.531078072 | 1     | 0.998 | 2.82E-129   | ACTB        | 3 | S100A8_TMo |
| 1065 | 8.14E-19  | 0.527560348 | 0.225 | 0.112 | 1.78E-14    | CLU         | 3 | S100A8_TMo |
| 1066 | 1.42E-12  | 0.523307943 | 0.333 | 0.247 | 3.09E-08    | FPR2        | 3 | S100A8_TMo |
| 1067 | 9.65E-78  | 0.517230963 | 0.962 | 0.964 | 2.10E-73    | MYL6        | 3 | S100A8_TMo |
| 1068 | 4.45E-32  | 0.499153835 | 0.198 | 0.063 | 9.70E-28    | NFE2        | 3 | S100A8_TMo |
| 1069 | 2.06E-24  | 0.489425609 | 0.173 | 0.06  | 4.49E-20    | 1-Mar       | 3 | S100A8_TMo |
| 1070 | 2.36E-15  | 0.481446261 | 0.559 | 0.526 | 5.14E-11    | LSP1        | 3 | S100A8_TMo |
| 1071 | 7.61E-14  | 0.478656956 | 0.583 | 0.631 | 1.66E-09    | NDUFB9      | 3 | S100A8_TMo |
| 1072 | 9.40E-39  | 0.475375757 | 0.875 | 0.859 | 2.05E-34    | IFITM2      | 3 | S100A8_TMo |
| 1073 | 2.95E-19  | 0.473602688 | 0.581 | 0.493 | 6.43E-15    | SLC2A3      | 3 | S100A8_TMo |
| 1074 | 1.05E-07  | 0.47010164  | 0.305 | 0.256 | 0.002300362 | UBR4        | 3 | S100A8_TMo |
| 1075 | 3.58E-26  | 0.46895967  | 0.219 | 0.087 | 7.80E-22    | QPCT        | 3 | S100A8_TMo |
| 1076 | 5.09E-22  | 0.467730805 | 0.171 | 0.064 | 1.11E-17    | CLEC4D      | 3 | S100A8_TMo |
| 1077 | 6.16E-11  | 0.466353925 | 0.571 | 0.648 | 1.34E-06    | NDUFB1      | 3 | S100A8_TMo |
| 1078 | 1.05E-17  | 0.465520759 | 0.638 | 0.651 | 2.29E-13    | FPR1        | 3 | S100A8_TMo |
| 1079 | 1.12E-13  | 0.463949467 | 0.159 | 0.075 | 2.45E-09    | CTB-61M7.2  | 3 | S100A8_TMo |
| 1080 | 3.02E-12  | 0.462176323 | 0.254 | 0.164 | 6.59E-08    | CPD         | 3 | S100A8_TMo |
| 1081 | 2.90E-16  | 0.458479301 | 0.197 | 0.091 | 6.32E-12    | SERPINB2    | 3 | S100A8_TMo |
| 1082 | 6.26E-49  | 0.453704235 | 0.904 | 0.946 | 1.37E-44    | EEF1D       | 3 | S100A8_TMo |
| 1083 | 1.44E-85  | 0.451846199 | 0.991 | 0.98  | 3.14E-81    | SH3BGRL3    | 3 | S100A8_TMo |
| 1084 | 4.67E-21  | 0.443517634 | 0.683 | 0.725 | 1.02E-16    | PKM         | 3 | S100A8_TMo |
| 1085 | 3.26E-26  | 0.428788682 | 0.803 | 0.882 | 7.11E-22    | MYL12A      | 3 | S100A8_TMo |
| 1086 | 1.02E-32  | 0.424973914 | 0.805 | 0.731 | 2.23E-28    | ANXA1       | 3 | S100A8_TMo |
| 1087 | 3.00E-13  | 0.424264426 | 0.644 | 0.738 | 6.53E-09    | SEC61G      | 3 | S100A8_TMo |
| 1088 | 1.03E-06  | 0.422209615 | 0.282 | 0.236 | 0.022464484 | FAM200B     | 3 | S100A8_TMo |
| 1089 | 2.55E-09  | 0.418524487 | 0.631 | 0.693 | 5.56E-05    | CD37        | 3 | S100A8_TMo |
| 1090 | 1.15E-22  | 0.414257187 | 0.751 | 0.854 | 2.51E-18    | TCEB2       | 3 | S100A8_TMo |
| 1091 | 1.93E-06  | 0.411733071 | 0.347 | 0.314 | 0.042142886 | CDC42EP3    | 3 | S100A8_TMo |
| 1092 | 3.80E-07  | 0.404796694 | 0.512 | 0.555 | 0.008296101 | LTA4H       | 3 | S100A8_TMo |
| 1093 | 2.43E-07  | 0.403019858 | 0.529 | 0.59  | 0.005299818 | AGTRAP      | 3 | S100A8_TMo |
| 1094 | 2.07E-07  | 0.402044435 | 0.497 | 0.56  | 0.004516899 | PGAM1       | 3 | S100A8_TMo |
| 1095 | 3.60E-57  | 0.399972924 | 0.982 | 0.982 | 7.84E-53    | H3F3A       | 3 | S100A8_TMo |
| 1096 | 7.13E-18  | 0.399716677 | 0.12  | 0.04  | 1.55E-13    | FAM101B     | 3 | S100A8_TMo |
| 1097 | 3.75E-13  | 0.394732539 | 0.191 | 0.101 | 8.17E-09    | TESC        | 3 | S100A8_TMo |
| 1098 | 7.82E-24  | 0.394717422 | 0.73  | 0.76  | 1.71E-19    | CORO1A      | 3 | S100A8_TMo |
| 1099 | 1.53E-112 | 0.39406405  | 0.994 | 0.997 | 3.34E-108   | RPLP1       | 3 | S100A8_TMo |
| 1100 | 2.19E-71  | 0.393842011 | 0.989 | 0.992 | 4.78E-67    | FAU         | 3 | S100A8_TMo |
| 1101 | 2.39E-09  | 0.38880646  | 0.611 | 0.714 | 5.22E-05    | APLP2       | 3 | S100A8_TMo |
| 1102 | 2.58E-12  | 0.377814422 | 0.65  | 0.76  | 5.64E-08    | GMFG        | 3 | S100A8_TMo |
| 1103 | 4.37E-60  | 0.377271423 | 0.992 | 0.997 | 9.53E-56    | RPS13       | 3 | S100A8_TMo |
| 1104 | 2.69E-21  | 0.376433844 | 0.743 | 0.849 | 5.87E-17    | C14orf2     | 3 | S100A8_TMo |
| 1105 | 3.24E-18  | 0.374820119 | 0.131 | 0.045 | 7.07E-14    | FOLR3       | 3 | S100A8_TMo |
| 1106 | 5.50E-18  | 0.373282961 | 0.123 | 0.041 | 1.20E-13    | PADI4       | 3 | S100A8_TMo |
| 1107 | 1.79E-06  | 0.369356632 | 0.173 | 0.118 | 0.039043514 | DYSF        | 3 | S100A8_TMo |
| 1108 | 1.64E-43  | 0.367511289 | 0.901 | 0.927 | 3.57E-39    | ALDOA       | 3 | S100A8_TMo |
| 1109 | 2.26E-51  | 0.364332142 | 0.983 | 0.986 | 4.93E-47    | ATP5E       | 3 | S100A8_TMo |
| 1110 | 3.07E-91  | 0.358119765 | 0.994 | 0.996 | 6.69E-87    | RPS24       | 3 | S100A8_TMo |
| 1111 | 6.30E-21  | 0.353296529 | 0.787 | 0.889 | 1.37E-16    | GNG5        | 3 | S100A8_TMo |
| 1112 | 1.92E-10  | 0.350838508 | 0.113 | 0.05  | 4.18E-06    | PROK2       | 3 | S100A8_TMo |
| 1113 | 7.44E-07  | 0.349811318 | 0.173 | 0.113 | 0.01621709  | VNN2        | 3 | S100A8_TMo |
| 1114 | 1.34E-44  | 0.348730423 | 0.976 | 0.96  | 2.91E-40    | ACTG1       | 3 | S100A8_TMo |
| 1115 | 2.00E-08  | 0.346166699 | 0.206 | 0.137 | 0.000436806 | RAB27A      | 3 | S100A8_TMo |
| 1116 | 6.34E-42  | 0.341429072 | 0.974 | 0.982 | 1.38E-37    | S100A11     | 3 | S100A8_TMo |
| 1117 | 2.48E-09  | 0.341320783 | 0.641 | 0.782 | 5.41E-05    | SUB1        | 3 | S100A8_TMo |
| 1118 | 6.14E-11  | 0.335240668 | 0.695 | 0.809 | 1.34E-06    | COMMD6      | 3 | S100A8_TMo |
| 1119 | 3.47E-20  | 0.32868039  | 0.102 | 0.026 | 7.56E-16    | SERPINB10   | 3 | S100A8_TMo |
| 1120 | 1.44E-09  | 0.326193719 | 0.637 | 0.751 | 3.15E-05    | SEC61B      | 3 | S100A8_TMo |
| 1121 | 7.10E-19  | 0.325694193 | 0.131 | 0.044 | 1.55E-14    | F5          | 3 | S100A8_TMo |
| 1122 | 4.71E-18  | 0.316683797 | 0.817 | 0.924 | 1.03E-13    | RPS26       | 3 | S100A8_TMo |
| 1123 | 6.86E-24  | 0.314675603 | 0.833 | 0.899 | 1.50E-19    | CLIC1       | 3 | S100A8_TMo |

|      |          |              |       |       |             |          |   |            |
|------|----------|--------------|-------|-------|-------------|----------|---|------------|
| 1124 | 3.09E-07 | 0.31118844   | 0.628 | 0.767 | 0.00673081  | COX7A2   | 3 | S100A8_TMo |
| 1125 | 2.36E-11 | 0.30787537   | 0.674 | 0.593 | 5.15E-07    | THBS1    | 3 | S100A8_TMo |
| 1126 | 1.86E-55 | 0.307680762  | 0.994 | 0.994 | 4.05E-51    | RPS15A   | 3 | S100A8_TMo |
| 1127 | 9.36E-09 | 0.294203606  | 0.683 | 0.817 | 0.000204063 | UBL5     | 3 | S100A8_TMo |
| 1128 | 2.25E-36 | 0.286932878  | 0.976 | 0.985 | 4.91E-32    | SERF2    | 3 | S100A8_TMo |
| 1129 | 1.55E-37 | 0.286014827  | 0.98  | 0.989 | 3.39E-33    | RPS7     | 3 | S100A8_TMo |
| 1130 | 1.04E-08 | 0.284224179  | 0.691 | 0.832 | 0.000227079 | UQCR11   | 3 | S100A8_TMo |
| 1131 | 1.17E-10 | 0.27745888   | 0.74  | 0.871 | 2.55E-06    | TMA7     | 3 | S100A8_TMo |
| 1132 | 9.91E-07 | 0.276479046  | 0.644 | 0.776 | 0.021619543 | PRR13    | 3 | S100A8_TMo |
| 1133 | 4.24E-41 | 0.276029596  | 0.995 | 0.996 | 9.24E-37    | RPS8     | 3 | S100A8_TMo |
| 1134 | 4.38E-07 | 0.275259469  | 0.725 | 0.868 | 0.009541714 | FXVD5    | 3 | S100A8_TMo |
| 1135 | 4.67E-65 | 0.274908072  | 0.998 | 0.996 | 1.02E-60    | RPL28    | 3 | S100A8_TMo |
| 1136 | 9.36E-16 | 0.270700074  | 0.904 | 0.964 | 2.04E-11    | ATP5G2   | 3 | S100A8_TMo |
| 1137 | 4.43E-48 | 0.266222359  | 0.997 | 0.995 | 9.65E-44    | RPL34    | 3 | S100A8_TMo |
| 1138 | 9.53E-08 | 0.262588385  | 0.101 | 0.05  | 0.002077485 | CRISPLD2 | 3 | S100A8_TMo |
| 1139 | 8.89E-35 | 0.254436255  | 1     | 0.996 | 1.94E-30    | RPL30    | 3 | S100A8_TMo |
| 1140 | 2.75E-24 | -0.25230878  | 0.443 | 0.768 | 6.00E-20    | EIF3F    | 3 | S100A8_TMo |
| 1141 | 1.17E-25 | -0.253353765 | 0.53  | 0.85  | 2.56E-21    | GPX4     | 3 | S100A8_TMo |
| 1142 | 4.47E-19 | -0.255899944 | 0.856 | 0.981 | 9.75E-15    | MT-ND5   | 3 | S100A8_TMo |
| 1143 | 2.22E-22 | -0.257730099 | 0.656 | 0.908 | 4.84E-18    | RPSA     | 3 | S100A8_TMo |
| 1144 | 2.15E-35 | -0.258593533 | 0.164 | 0.478 | 4.69E-31    | CD47     | 3 | S100A8_TMo |
| 1145 | 3.03E-33 | -0.259300848 | 0.159 | 0.453 | 6.61E-29    | SLC31A2  | 3 | S100A8_TMo |
| 1146 | 2.31E-36 | -0.259460501 | 0.497 | 0.807 | 5.04E-32    | MT2A     | 3 | S100A8_TMo |
| 1147 | 9.78E-33 | -0.259697479 | 0.174 | 0.477 | 2.13E-28    | AUP1     | 3 | S100A8_TMo |
| 1148 | 2.85E-32 | -0.262095874 | 0.168 | 0.458 | 6.20E-28    | SERPINB6 | 3 | S100A8_TMo |
| 1149 | 1.50E-16 | -0.262554745 | 0.326 | 0.559 | 3.27E-12    | SOCS3    | 3 | S100A8_TMo |
| 1150 | 1.91E-30 | -0.263238855 | 0.56  | 0.891 | 4.16E-26    | ANXA5    | 3 | S100A8_TMo |
| 1151 | 2.73E-31 | -0.263769588 | 0.339 | 0.704 | 5.96E-27    | NAP1L1   | 3 | S100A8_TMo |
| 1152 | 3.19E-31 | -0.264344166 | 0.116 | 0.374 | 6.96E-27    | SCIMP    | 3 | S100A8_TMo |
| 1153 | 1.45E-12 | -0.264942408 | 0.712 | 0.901 | 3.17E-08    | KLF6     | 3 | S100A8_TMo |
| 1154 | 1.04E-25 | -0.265308541 | 0.479 | 0.798 | 2.26E-21    | EIF3E    | 3 | S100A8_TMo |
| 1155 | 7.06E-31 | -0.265466524 | 0.374 | 0.736 | 1.54E-26    | TMEM59   | 3 | S100A8_TMo |
| 1156 | 1.58E-31 | -0.265720283 | 0.267 | 0.602 | 3.44E-27    | NFE2L2   | 3 | S100A8_TMo |
| 1157 | 1.01E-36 | -0.26861803  | 0.994 | 0.996 | 2.20E-32    | EEF1A1   | 3 | S100A8_TMo |
| 1158 | 1.35E-19 | -0.270616033 | 0.89  | 0.976 | 2.95E-15    | DUSP1    | 3 | S100A8_TMo |
| 1159 | 5.91E-34 | -0.271658263 | 0.186 | 0.499 | 1.29E-29    | OXA1L    | 3 | S100A8_TMo |
| 1160 | 4.70E-31 | -0.271975937 | 0.243 | 0.567 | 1.03E-26    | ATP1B3   | 3 | S100A8_TMo |
| 1161 | 1.70E-27 | -0.272311998 | 0.243 | 0.547 | 3.70E-23    | RNF144B  | 3 | S100A8_TMo |
| 1162 | 3.79E-34 | -0.272444301 | 0.188 | 0.515 | 8.27E-30    | SLC3A2   | 3 | S100A8_TMo |
| 1163 | 2.81E-37 | -0.273413223 | 0.23  | 0.587 | 6.14E-33    | SNHG8    | 3 | S100A8_TMo |
| 1164 | 1.47E-28 | -0.275138982 | 0.131 | 0.387 | 3.22E-24    | IDH1     | 3 | S100A8_TMo |
| 1165 | 2.70E-21 | -0.276233541 | 0.366 | 0.642 | 5.90E-17    | NFKBIZ   | 3 | S100A8_TMo |
| 1166 | 9.59E-34 | -0.278448631 | 0.155 | 0.45  | 2.09E-29    | SNAP23   | 3 | S100A8_TMo |
| 1167 | 1.94E-11 | -0.27866217  | 0.21  | 0.37  | 4.23E-07    | EGR1     | 3 | S100A8_TMo |
| 1168 | 5.68E-25 | -0.279968112 | 0.104 | 0.321 | 1.24E-20    | SDF2L1   | 3 | S100A8_TMo |
| 1169 | 1.49E-36 | -0.280160096 | 0.231 | 0.584 | 3.26E-32    | FAM96A   | 3 | S100A8_TMo |
| 1170 | 1.18E-26 | -0.280181327 | 0.547 | 0.847 | 2.57E-22    | SLC25A5  | 3 | S100A8_TMo |
| 1171 | 4.70E-37 | -0.280648751 | 0.2   | 0.543 | 1.03E-32    | HNMT     | 3 | S100A8_TMo |
| 1172 | 4.36E-29 | -0.282030514 | 0.392 | 0.747 | 9.51E-25    | GSTK1    | 3 | S100A8_TMo |
| 1173 | 6.42E-47 | -0.282406485 | 0.965 | 0.993 | 1.40E-42    | RPS27    | 3 | S100A8_TMo |
| 1174 | 4.53E-31 | -0.283105518 | 0.218 | 0.527 | 9.89E-27    | MYDGF    | 3 | S100A8_TMo |
| 1175 | 1.52E-35 | -0.283353152 | 0.255 | 0.604 | 3.31E-31    | TOMM20   | 3 | S100A8_TMo |
| 1176 | 1.16E-38 | -0.284030585 | 0.281 | 0.652 | 2.52E-34    | RNF13    | 3 | S100A8_TMo |
| 1177 | 1.98E-27 | -0.284732017 | 0.407 | 0.757 | 4.31E-23    | RPS20    | 3 | S100A8_TMo |
| 1178 | 8.51E-31 | -0.287200632 | 0.704 | 0.937 | 1.86E-26    | RPL13A   | 3 | S100A8_TMo |
| 1179 | 3.34E-33 | -0.290959882 | 0.85  | 0.976 | 7.29E-29    | CTSS     | 3 | S100A8_TMo |
| 1180 | 8.94E-27 | -0.293008565 | 0.111 | 0.344 | 1.95E-22    | CKS2     | 3 | S100A8_TMo |
| 1181 | 1.13E-28 | -0.293668862 | 0.462 | 0.786 | 2.47E-24    | MFS1     | 3 | S100A8_TMo |
| 1182 | 1.96E-34 | -0.294822437 | 0.12  | 0.399 | 4.26E-30    | CHD2     | 3 | S100A8_TMo |
| 1183 | 1.12E-29 | -0.296795818 | 0.263 | 0.577 | 2.44E-25    | CTS2     | 3 | S100A8_TMo |
| 1184 | 3.11E-37 | -0.297896151 | 0.117 | 0.414 | 6.79E-33    | HLA-F    | 3 | S100A8_TMo |
| 1185 | 2.97E-34 | -0.298369033 | 0.128 | 0.409 | 6.48E-30    | NAGK     | 3 | S100A8_TMo |
| 1186 | 1.00E-35 | -0.299207909 | 0.339 | 0.716 | 2.19E-31    | MGAT1    | 3 | S100A8_TMo |
| 1187 | 4.71E-32 | -0.299569728 | 0.102 | 0.356 | 1.03E-27    | DDX3Y    | 3 | S100A8_TMo |
| 1188 | 7.84E-34 | -0.30033702  | 0.107 | 0.381 | 1.71E-29    | IER5     | 3 | S100A8_TMo |
| 1189 | 7.56E-40 | -0.302350626 | 0.186 | 0.527 | 1.65E-35    | MPP1     | 3 | S100A8_TMo |
| 1190 | 4.47E-29 | -0.302879265 | 0.218 | 0.515 | 9.74E-25    | INSIG1   | 3 | S100A8_TMo |
| 1191 | 2.29E-36 | -0.303086368 | 0.161 | 0.476 | 4.99E-32    | RASSF4   | 3 | S100A8_TMo |
| 1192 | 6.48E-40 | -0.304006813 | 0.204 | 0.561 | 1.41E-35    | NUCB1    | 3 | S100A8_TMo |
| 1193 | 1.74E-33 | -0.304471351 | 0.772 | 0.937 | 3.80E-29    | RPS5     | 3 | S100A8_TMo |
| 1194 | 3.76E-51 | -0.304614177 | 0.943 | 0.993 | 8.20E-47    | EIF1     | 3 | S100A8_TMo |
| 1195 | 9.35E-41 | -0.305237928 | 0.152 | 0.483 | 2.04E-36    | BLVRA    | 3 | S100A8_TMo |
| 1196 | 7.39E-41 | -0.308200233 | 0.212 | 0.567 | 1.61E-36    | LRRRC25  | 3 | S100A8_TMo |
| 1197 | 1.38E-37 | -0.308343248 | 0.276 | 0.64  | 3.02E-33    | UBXN1    | 3 | S100A8_TMo |
| 1198 | 1.92E-35 | -0.308512541 | 0.284 | 0.639 | 4.19E-31    | FUS      | 3 | S100A8_TMo |

|      |          |              |       |       |          |         |   |            |
|------|----------|--------------|-------|-------|----------|---------|---|------------|
| 1199 | 1.06E-37 | -0.308815953 | 0.156 | 0.472 | 2.31E-33 | AKR1A1  | 3 | S100A8_TMo |
| 1200 | 1.42E-38 | -0.309586002 | 0.104 | 0.397 | 3.09E-34 | NANS    | 3 | S100A8_TMo |
| 1201 | 1.92E-36 | -0.31048272  | 0.155 | 0.466 | 4.18E-32 | RAB20   | 3 | S100A8_TMo |
| 1202 | 1.22E-43 | -0.310889492 | 0.252 | 0.643 | 2.67E-39 | ARL6IP1 | 3 | S100A8_TMo |
| 1203 | 1.07E-28 | -0.310992401 | 0.682 | 0.928 | 2.32E-24 | RPL10A  | 3 | S100A8_TMo |
| 1204 | 9.15E-32 | -0.312261819 | 0.368 | 0.721 | 2.00E-27 | PTGES3  | 3 | S100A8_TMo |
| 1205 | 1.10E-30 | -0.314051048 | 0.652 | 0.927 | 2.40E-26 | RPL38   | 3 | S100A8_TMo |
| 1206 | 5.82E-29 | -0.315216871 | 0.182 | 0.46  | 1.27E-24 | PELI1   | 3 | S100A8_TMo |
| 1207 | 3.82E-37 | -0.315870608 | 0.153 | 0.466 | 8.32E-33 | IRF8    | 3 | S100A8_TMo |
| 1208 | 6.48E-41 | -0.316760945 | 0.146 | 0.47  | 1.41E-36 | EIF3D   | 3 | S100A8_TMo |
| 1209 | 1.52E-63 | -0.31682822  | 1     | 0.999 | 3.31E-59 | B2M     | 3 | S100A8_TMo |
| 1210 | 3.63E-41 | -0.316885546 | 0.141 | 0.469 | 7.91E-37 | PRCP    | 3 | S100A8_TMo |
| 1211 | 2.63E-34 | -0.317080202 | 0.101 | 0.37  | 5.75E-30 | ELL2    | 3 | S100A8_TMo |
| 1212 | 2.25E-43 | -0.317321169 | 0.186 | 0.546 | 4.90E-39 | IL10RA  | 3 | S100A8_TMo |
| 1213 | 7.96E-39 | -0.317356972 | 0.269 | 0.638 | 1.74E-34 | SNX6    | 3 | S100A8_TMo |
| 1214 | 2.12E-35 | -0.3174914   | 0.272 | 0.626 | 4.62E-31 | TUBA1B  | 3 | S100A8_TMo |
| 1215 | 1.11E-38 | -0.318163205 | 0.128 | 0.438 | 2.43E-34 | ITGA4   | 3 | S100A8_TMo |
| 1216 | 2.19E-39 | -0.318283919 | 0.275 | 0.649 | 4.78E-35 | BST2    | 3 | S100A8_TMo |
| 1217 | 2.97E-38 | -0.321559026 | 0.156 | 0.477 | 6.48E-34 | NPL     | 3 | S100A8_TMo |
| 1218 | 2.33E-34 | -0.323242994 | 0.71  | 0.941 | 5.07E-30 | RPL3    | 3 | S100A8_TMo |
| 1219 | 7.52E-16 | -0.325292876 | 0.446 | 0.687 | 1.64E-11 | CD52    | 3 | S100A8_TMo |
| 1220 | 7.84E-37 | -0.326680302 | 0.296 | 0.661 | 1.71E-32 | MAP3K8  | 3 | S100A8_TMo |
| 1221 | 4.36E-36 | -0.327874077 | 0.192 | 0.518 | 9.51E-32 | TNFAIP2 | 3 | S100A8_TMo |
| 1222 | 2.40E-35 | -0.329181843 | 0.143 | 0.442 | 5.24E-31 | FCGR2A  | 3 | S100A8_TMo |
| 1223 | 1.97E-42 | -0.329651294 | 0.204 | 0.576 | 4.29E-38 | EIF4A2  | 3 | S100A8_TMo |
| 1224 | 2.51E-46 | -0.329702775 | 0.2   | 0.588 | 5.48E-42 | MARCKS  | 3 | S100A8_TMo |
| 1225 | 1.43E-37 | -0.33124803  | 0.97  | 0.997 | 3.13E-33 | MT-ATP6 | 3 | S100A8_TMo |
| 1226 | 7.71E-39 | -0.332403092 | 0.356 | 0.737 | 1.68E-34 | LY96    | 3 | S100A8_TMo |
| 1227 | 1.59E-11 | -0.332500021 | 0.683 | 0.856 | 3.47E-07 | SOD2    | 3 | S100A8_TMo |
| 1228 | 1.81E-33 | -0.333450169 | 0.132 | 0.411 | 3.95E-29 | LY6E    | 3 | S100A8_TMo |
| 1229 | 1.76E-41 | -0.336633522 | 0.215 | 0.568 | 3.83E-37 | LAMP1   | 3 | S100A8_TMo |
| 1230 | 7.89E-32 | -0.336935076 | 0.428 | 0.773 | 1.72E-27 | PRDX1   | 3 | S100A8_TMo |
| 1231 | 1.56E-38 | -0.337099052 | 0.144 | 0.456 | 3.40E-34 | AOAH    | 3 | S100A8_TMo |
| 1232 | 5.60E-45 | -0.337238708 | 0.251 | 0.631 | 1.22E-40 | NDFIP1  | 3 | S100A8_TMo |
| 1233 | 2.56E-41 | -0.33768792  | 0.261 | 0.631 | 5.59E-37 | TUBB    | 3 | S100A8_TMo |
| 1234 | 1.39E-44 | -0.338136802 | 0.126 | 0.461 | 3.03E-40 | UTRN    | 3 | S100A8_TMo |
| 1235 | 1.08E-36 | -0.338387393 | 0.137 | 0.438 | 2.35E-32 | ADGRE2  | 3 | S100A8_TMo |
| 1236 | 2.01E-31 | -0.338435549 | 0.498 | 0.823 | 4.39E-27 | EEF1G   | 3 | S100A8_TMo |
| 1237 | 5.52E-44 | -0.34126038  | 0.179 | 0.529 | 1.20E-39 | MCTP1   | 3 | S100A8_TMo |
| 1238 | 1.11E-33 | -0.341307217 | 0.335 | 0.694 | 2.43E-29 | DNAJA1  | 3 | S100A8_TMo |
| 1239 | 1.35E-39 | -0.34210304  | 0.182 | 0.513 | 2.94E-35 | WASF2   | 3 | S100A8_TMo |
| 1240 | 1.65E-41 | -0.345140658 | 0.144 | 0.474 | 3.59E-37 | NAAA    | 3 | S100A8_TMo |
| 1241 | 1.54E-18 | -0.345224487 | 0.773 | 0.916 | 3.35E-14 | NFKBIA  | 3 | S100A8_TMo |
| 1242 | 4.10E-52 | -0.349661158 | 0.862 | 0.976 | 8.94E-48 | RPS16   | 3 | S100A8_TMo |
| 1243 | 6.28E-39 | -0.350803493 | 0.282 | 0.654 | 1.37E-34 | PDIA3   | 3 | S100A8_TMo |
| 1244 | 1.80E-39 | -0.350993039 | 0.104 | 0.402 | 3.93E-35 | BHLHE40 | 3 | S100A8_TMo |
| 1245 | 3.65E-38 | -0.35138301  | 0.67  | 0.921 | 7.96E-34 | SLC25A6 | 3 | S100A8_TMo |
| 1246 | 1.95E-42 | -0.351547687 | 0.347 | 0.748 | 4.25E-38 | LAPTM4A | 3 | S100A8_TMo |
| 1247 | 5.84E-33 | -0.353250149 | 0.605 | 0.883 | 1.27E-28 | EEF2    | 3 | S100A8_TMo |
| 1248 | 9.78E-42 | -0.354311598 | 0.207 | 0.558 | 2.13E-37 | DPP7    | 3 | S100A8_TMo |
| 1249 | 2.45E-39 | -0.355188263 | 0.134 | 0.441 | 5.34E-35 | CD86    | 3 | S100A8_TMo |
| 1250 | 1.13E-35 | -0.358267737 | 0.119 | 0.397 | 2.47E-31 | CSRNP1  | 3 | S100A8_TMo |
| 1251 | 5.06E-26 | -0.35900766  | 0.52  | 0.796 | 1.10E-21 | CFD     | 3 | S100A8_TMo |
| 1252 | 1.06E-40 | -0.360377632 | 0.179 | 0.519 | 2.31E-36 | SOD1    | 3 | S100A8_TMo |
| 1253 | 7.94E-36 | -0.361718542 | 0.344 | 0.698 | 1.73E-31 | RNASE6  | 3 | S100A8_TMo |
| 1254 | 5.43E-40 | -0.362713343 | 0.21  | 0.558 | 1.18E-35 | DOK2    | 3 | S100A8_TMo |
| 1255 | 2.59E-37 | -0.364650711 | 0.584 | 0.895 | 5.66E-33 | RPL4    | 3 | S100A8_TMo |
| 1256 | 1.70E-48 | -0.365091781 | 0.264 | 0.669 | 3.70E-44 | RAB5C   | 3 | S100A8_TMo |
| 1257 | 1.10E-38 | -0.366652654 | 0.479 | 0.847 | 2.39E-34 | RPL27A  | 3 | S100A8_TMo |
| 1258 | 9.80E-27 | -0.368591    | 0.366 | 0.649 | 2.14E-22 | CXCR4   | 3 | S100A8_TMo |
| 1259 | 2.44E-43 | -0.36971076  | 0.246 | 0.618 | 5.32E-39 | TMEM123 | 3 | S100A8_TMo |
| 1260 | 1.05E-42 | -0.370493629 | 0.135 | 0.461 | 2.29E-38 | ZCCHC6  | 3 | S100A8_TMo |
| 1261 | 2.44E-47 | -0.37094068  | 0.206 | 0.588 | 5.32E-43 | ST13    | 3 | S100A8_TMo |
| 1262 | 2.93E-39 | -0.371911379 | 0.221 | 0.57  | 6.39E-35 | CYCS    | 3 | S100A8_TMo |
| 1263 | 5.13E-35 | -0.374288132 | 0.425 | 0.767 | 1.12E-30 | IFNGR1  | 3 | S100A8_TMo |
| 1264 | 2.19E-28 | -0.375565282 | 0.701 | 0.922 | 4.78E-24 | TIMP1   | 3 | S100A8_TMo |
| 1265 | 1.94E-47 | -0.377898639 | 0.225 | 0.612 | 4.22E-43 | GLTSCR2 | 3 | S100A8_TMo |
| 1266 | 1.49E-45 | -0.379937698 | 0.117 | 0.447 | 3.25E-41 | FAM49A  | 3 | S100A8_TMo |
| 1267 | 8.88E-43 | -0.380121995 | 0.206 | 0.562 | 1.94E-38 | PRNP    | 3 | S100A8_TMo |
| 1268 | 2.97E-34 | -0.380634891 | 0.228 | 0.558 | 6.47E-29 | SELK    | 3 | S100A8_TMo |
| 1269 | 2.82E-33 | -0.382052963 | 0.104 | 0.365 | 6.15E-29 | ZNF331  | 3 | S100A8_TMo |
| 1270 | 2.25E-42 | -0.39031886  | 0.48  | 0.845 | 4.92E-38 | VAMP8   | 3 | S100A8_TMo |
| 1271 | 5.25E-46 | -0.391093807 | 0.198 | 0.568 | 1.15E-41 | LILRB1  | 3 | S100A8_TMo |
| 1272 | 9.37E-31 | -0.392079598 | 0.508 | 0.83  | 2.04E-26 | WSB1    | 3 | S100A8_TMo |
| 1273 | 7.80E-45 | -0.399268517 | 0.272 | 0.658 | 1.70E-40 | CHCHD10 | 3 | S100A8_TMo |

|      |           |              |       |       |             |          |   |            |
|------|-----------|--------------|-------|-------|-------------|----------|---|------------|
| 1274 | 1.87E-36  | -0.402717914 | 0.575 | 0.878 | 4.08E-32    | GRN      | 3 | S100A8_TMo |
| 1275 | 2.40E-28  | -0.403392632 | 0.264 | 0.55  | 5.23E-24    | CITED2   | 3 | S100A8_TMo |
| 1276 | 9.85E-46  | -0.407900223 | 0.27  | 0.657 | 2.15E-41    | REL      | 3 | S100A8_TMo |
| 1277 | 6.24E-29  | -0.408587948 | 0.509 | 0.794 | 1.36E-24    | PPP1R15A | 3 | S100A8_TMo |
| 1278 | 1.46E-38  | -0.409114519 | 0.707 | 0.94  | 3.19E-34    | UBC      | 3 | S100A8_TMo |
| 1279 | 6.83E-54  | -0.411770248 | 0.26  | 0.664 | 1.49E-49    | SLC7A7   | 3 | S100A8_TMo |
| 1280 | 1.50E-52  | -0.413555645 | 0.167 | 0.555 | 3.27E-48    | MAN2B1   | 3 | S100A8_TMo |
| 1281 | 2.44E-42  | -0.417630447 | 0.411 | 0.778 | 5.31E-38    | FGL2     | 3 | S100A8_TMo |
| 1282 | 6.89E-46  | -0.417695399 | 0.119 | 0.447 | 1.50E-41    | FGD2     | 3 | S100A8_TMo |
| 1283 | 8.82E-52  | -0.422415196 | 0.189 | 0.582 | 1.92E-47    | DRAM2    | 3 | S100A8_TMo |
| 1284 | 8.07E-51  | -0.424534589 | 0.275 | 0.69  | 1.76E-46    | LCP2     | 3 | S100A8_TMo |
| 1285 | 3.92E-76  | -0.431208238 | 0.916 | 0.987 | 8.55E-72    | RPS19    | 3 | S100A8_TMo |
| 1286 | 1.10E-50  | -0.431217269 | 0.179 | 0.553 | 2.39E-46    | GAA      | 3 | S100A8_TMo |
| 1287 | 3.11E-53  | -0.432958699 | 0.12  | 0.48  | 6.77E-49    | GUSB     | 3 | S100A8_TMo |
| 1288 | 1.18E-54  | -0.435181637 | 0.284 | 0.717 | 2.57E-50    | TBXAS1   | 3 | S100A8_TMo |
| 1289 | 1.48E-43  | -0.441785344 | 0.299 | 0.673 | 3.23E-39    | MT-ND6   | 3 | S100A8_TMo |
| 1290 | 2.37E-42  | -0.444853009 | 0.383 | 0.757 | 5.17E-38    | KLF4     | 3 | S100A8_TMo |
| 1291 | 6.86E-36  | -0.44994081  | 0.144 | 0.434 | 1.50E-31    | DUSP2    | 3 | S100A8_TMo |
| 1292 | 2.61E-41  | -0.449995246 | 0.132 | 0.445 | 5.69E-37    | EIF4A3   | 3 | S100A8_TMo |
| 1293 | 4.09E-49  | -0.453070588 | 0.308 | 0.697 | 8.93E-45    | TPP1     | 3 | S100A8_TMo |
| 1294 | 1.29E-51  | -0.453789448 | 0.176 | 0.548 | 2.80E-47    | PDIA6    | 3 | S100A8_TMo |
| 1295 | 3.37E-52  | -0.45784365  | 0.116 | 0.467 | 7.35E-48    | RNF141   | 3 | S100A8_TMo |
| 1296 | 9.56E-53  | -0.460826571 | 0.524 | 0.874 | 2.09E-48    | HCLS1    | 3 | S100A8_TMo |
| 1297 | 5.39E-53  | -0.461167364 | 0.138 | 0.506 | 1.17E-48    | LILRB4   | 3 | S100A8_TMo |
| 1298 | 7.23E-61  | -0.462381055 | 0.245 | 0.683 | 1.58E-56    | LGALS9   | 3 | S100A8_TMo |
| 1299 | 1.02E-47  | -0.465662975 | 0.335 | 0.736 | 2.22E-43    | SQSTM1   | 3 | S100A8_TMo |
| 1300 | 5.39E-38  | -0.469384143 | 0.152 | 0.447 | 1.18E-33    | SMPDL3A  | 3 | S100A8_TMo |
| 1301 | 8.67E-49  | -0.477789508 | 0.607 | 0.903 | 1.89E-44    | CD63     | 3 | S100A8_TMo |
| 1302 | 7.52E-62  | -0.481390187 | 0.131 | 0.538 | 1.64E-57    | PABPC4   | 3 | S100A8_TMo |
| 1303 | 6.56E-53  | -0.48279869  | 0.48  | 0.851 | 1.43E-48    | BLVRB    | 3 | S100A8_TMo |
| 1304 | 1.12E-52  | -0.483801726 | 0.551 | 0.885 | 2.44E-48    | ASAH1    | 3 | S100A8_TMo |
| 1305 | 1.52E-50  | -0.484143641 | 0.787 | 0.952 | 3.31E-46    | JUNB     | 3 | S100A8_TMo |
| 1306 | 7.43E-21  | -0.485776722 | 0.101 | 0.284 | 1.62E-16    | TNF      | 3 | S100A8_TMo |
| 1307 | 5.21E-49  | -0.488308565 | 0.132 | 0.482 | 1.14E-44    | ATF3     | 3 | S100A8_TMo |
| 1308 | 4.52E-40  | -0.495020249 | 0.372 | 0.706 | 9.86E-36    | TXNIP    | 3 | S100A8_TMo |
| 1309 | 6.88E-51  | -0.500940183 | 0.535 | 0.883 | 1.50E-46    | MAFB     | 3 | S100A8_TMo |
| 1310 | 3.43E-16  | -0.502452312 | 0.116 | 0.269 | 7.47E-12    | IL1RN    | 3 | S100A8_TMo |
| 1311 | 2.37E-41  | -0.50314477  | 0.279 | 0.647 | 5.17E-37    | PLIN2    | 3 | S100A8_TMo |
| 1312 | 8.00E-40  | -0.508694384 | 0.395 | 0.716 | 1.74E-35    | NR4A2    | 3 | S100A8_TMo |
| 1313 | 2.37E-27  | -0.512194385 | 0.369 | 0.645 | 5.16E-23    | IER3     | 3 | S100A8_TMo |
| 1314 | 1.04E-08  | -0.521034075 | 0.227 | 0.341 | 0.000227609 | GOS2     | 3 | S100A8_TMo |
| 1315 | 1.59E-55  | -0.522731639 | 0.369 | 0.784 | 3.46E-51    | HERPUD1  | 3 | S100A8_TMo |
| 1316 | 4.12E-56  | -0.527256304 | 0.3   | 0.705 | 8.98E-52    | CECR1    | 3 | S100A8_TMo |
| 1317 | 2.49E-97  | -0.531996875 | 0.857 | 0.982 | 5.43E-93    | HLA-C    | 3 | S100A8_TMo |
| 1318 | 7.79E-63  | -0.53245868  | 0.429 | 0.84  | 1.70E-58    | SARAF    | 3 | S100A8_TMo |
| 1319 | 2.54E-68  | -0.539356645 | 0.401 | 0.816 | 5.53E-64    | NPM1     | 3 | S100A8_TMo |
| 1320 | 9.53E-58  | -0.539935871 | 0.131 | 0.511 | 2.08E-53    | IL18     | 3 | S100A8_TMo |
| 1321 | 6.08E-52  | -0.549523247 | 0.38  | 0.77  | 1.33E-47    | HSP90B1  | 3 | S100A8_TMo |
| 1322 | 7.98E-56  | -0.554886542 | 0.315 | 0.714 | 1.74E-51    | IGSF6    | 3 | S100A8_TMo |
| 1323 | 8.40E-58  | -0.558376988 | 0.206 | 0.61  | 1.83E-53    | PLD3     | 3 | S100A8_TMo |
| 1324 | 2.63E-77  | -0.563550923 | 0.88  | 0.989 | 5.73E-73    | MT-ND4L  | 3 | S100A8_TMo |
| 1325 | 3.21E-48  | -0.56957954  | 0.309 | 0.675 | 7.00E-44    | CDKN1A   | 3 | S100A8_TMo |
| 1326 | 2.14E-73  | -0.574153104 | 0.119 | 0.551 | 4.67E-69    | SNX5     | 3 | S100A8_TMo |
| 1327 | 1.30E-68  | -0.581855398 | 0.101 | 0.509 | 2.84E-64    | HLA-DMB  | 3 | S100A8_TMo |
| 1328 | 4.46E-64  | -0.592288329 | 0.321 | 0.762 | 9.72E-60    | UBB      | 3 | S100A8_TMo |
| 1329 | 2.06E-53  | -0.592858721 | 0.284 | 0.679 | 4.48E-49    | DDIT4    | 3 | S100A8_TMo |
| 1330 | 3.35E-125 | -0.596178983 | 0.895 | 0.99  | 7.31E-121   | HLA-B    | 3 | S100A8_TMo |
| 1331 | 1.31E-69  | -0.601194793 | 0.102 | 0.513 | 2.87E-65    | TCN2     | 3 | S100A8_TMo |
| 1332 | 2.18E-56  | -0.601748859 | 0.297 | 0.704 | 4.76E-52    | NINJ1    | 3 | S100A8_TMo |
| 1333 | 2.89E-49  | -0.617187088 | 0.131 | 0.468 | 6.31E-45    | GPR183   | 3 | S100A8_TMo |
| 1334 | 2.08E-102 | -0.62895909  | 0.665 | 0.952 | 4.54E-98    | YBX1     | 3 | S100A8_TMo |
| 1335 | 4.93E-70  | -0.636908437 | 0.267 | 0.713 | 1.07E-65    | CALR     | 3 | S100A8_TMo |
| 1336 | 7.62E-72  | -0.636912954 | 0.79  | 0.956 | 1.66E-67    | ZFP36    | 3 | S100A8_TMo |
| 1337 | 1.53E-61  | -0.639598539 | 0.254 | 0.661 | 3.34E-57    | ID2      | 3 | S100A8_TMo |
| 1338 | 1.04E-67  | -0.643874168 | 0.395 | 0.834 | 2.28E-63    | HSP90AB1 | 3 | S100A8_TMo |
| 1339 | 4.06E-85  | -0.646478813 | 0.739 | 0.968 | 8.85E-81    | MT-ATP8  | 3 | S100A8_TMo |
| 1340 | 6.27E-56  | -0.646756919 | 0.482 | 0.84  | 1.37E-51    | RHOB     | 3 | S100A8_TMo |
| 1341 | 3.69E-97  | -0.648327901 | 0.763 | 0.969 | 8.04E-93    | ITM2B    | 3 | S100A8_TMo |
| 1342 | 1.63E-77  | -0.65024085  | 0.52  | 0.9   | 3.56E-73    | GLUL     | 3 | S100A8_TMo |
| 1343 | 1.84E-103 | -0.659694485 | 0.965 | 0.999 | 4.01E-99    | CST3     | 3 | S100A8_TMo |
| 1344 | 3.24E-60  | -0.685186437 | 0.212 | 0.624 | 7.07E-56    | HSPE1    | 3 | S100A8_TMo |
| 1345 | 6.37E-79  | -0.686423482 | 0.224 | 0.685 | 1.39E-74    | CPVL     | 3 | S100A8_TMo |
| 1346 | 1.74E-38  | -0.695970344 | 0.351 | 0.677 | 3.79E-34    | HSPA5    | 3 | S100A8_TMo |
| 1347 | 8.92E-82  | -0.6972018   | 0.126 | 0.59  | 1.95E-77    | CLEC2B   | 3 | S100A8_TMo |
| 1348 | 7.89E-150 | -0.699176662 | 0.997 | 1     | 1.72E-145   | FTL      | 3 | S100A8_TMo |

|      |           |              |       |       |             |           |   |            |
|------|-----------|--------------|-------|-------|-------------|-----------|---|------------|
| 1349 | 1.03E-50  | -0.699489213 | 0.195 | 0.553 | 2.25E-46    | CHMP1B    | 3 | S100A8_TMo |
| 1350 | 3.28E-132 | -0.709560297 | 0.949 | 0.999 | 7.15E-128   | SAT1      | 3 | S100A8_TMo |
| 1351 | 1.63E-91  | -0.711776415 | 0.685 | 0.949 | 3.56E-87    | CD163     | 3 | S100A8_TMo |
| 1352 | 3.96E-84  | -0.724140246 | 0.401 | 0.848 | 8.63E-80    | ZFP36L1   | 3 | S100A8_TMo |
| 1353 | 8.10E-83  | -0.731455917 | 0.14  | 0.602 | 1.77E-78    | FAM26F    | 3 | S100A8_TMo |
| 1354 | 2.84E-103 | -0.731658951 | 0.551 | 0.923 | 6.20E-99    | HLA-E     | 3 | S100A8_TMo |
| 1355 | 4.92E-77  | -0.737155809 | 0.105 | 0.536 | 1.07E-72    | MCOLN1    | 3 | S100A8_TMo |
| 1356 | 3.47E-56  | -0.753640018 | 0.123 | 0.492 | 7.58E-52    | ICAM1     | 3 | S100A8_TMo |
| 1357 | 7.11E-61  | -0.756511862 | 0.237 | 0.638 | 1.55E-56    | SGK1      | 3 | S100A8_TMo |
| 1358 | 5.37E-133 | -0.75921114  | 0.734 | 0.968 | 1.17E-128   | HLA-A     | 3 | S100A8_TMo |
| 1359 | 2.10E-73  | -0.78257565  | 0.173 | 0.608 | 4.59E-69    | NR4A1     | 3 | S100A8_TMo |
| 1360 | 2.78E-100 | -0.786253949 | 0.128 | 0.647 | 6.07E-96    | CXCL16    | 3 | S100A8_TMo |
| 1361 | 1.90E-92  | -0.792274189 | 0.404 | 0.846 | 4.15E-88    | HSPA8     | 3 | S100A8_TMo |
| 1362 | 8.71E-82  | -0.794018012 | 0.299 | 0.737 | 1.90E-77    | CREG1     | 3 | S100A8_TMo |
| 1363 | 3.98E-76  | -0.806839888 | 0.212 | 0.661 | 8.69E-72    | CD83      | 3 | S100A8_TMo |
| 1364 | 4.02E-85  | -0.820652183 | 0.646 | 0.918 | 8.77E-81    | MS4A6A    | 3 | S100A8_TMo |
| 1365 | 2.82E-90  | -0.822105718 | 0.461 | 0.872 | 6.14E-86    | FCGRT     | 3 | S100A8_TMo |
| 1366 | 7.29E-59  | -0.865298079 | 0.186 | 0.581 | 1.59E-54    | HSPD1     | 3 | S100A8_TMo |
| 1367 | 3.85E-141 | -0.871698875 | 0.808 | 0.97  | 8.39E-137   | PSAP      | 3 | S100A8_TMo |
| 1368 | 2.20E-49  | -0.875767354 | 0.38  | 0.716 | 4.80E-45    | JUN       | 3 | S100A8_TMo |
| 1369 | 3.63E-115 | -0.895859723 | 0.366 | 0.848 | 7.93E-111   | RNASET2   | 3 | S100A8_TMo |
| 1370 | 4.80E-79  | -0.915314772 | 0.11  | 0.545 | 1.05E-74    | FABP5     | 3 | S100A8_TMo |
| 1371 | 1.92E-145 | -0.918639063 | 0.662 | 0.964 | 4.18E-141   | NPC2      | 3 | S100A8_TMo |
| 1372 | 7.68E-40  | -0.933263545 | 0.116 | 0.393 | 1.68E-35    | CCL3L3    | 3 | S100A8_TMo |
| 1373 | 3.57E-50  | -0.970129397 | 0.272 | 0.614 | 7.79E-46    | CXCL2     | 3 | S100A8_TMo |
| 1374 | 1.24E-64  | -0.988762157 | 0.556 | 0.893 | 2.70E-60    | HSP90AA1  | 3 | S100A8_TMo |
| 1375 | 1.67E-101 | -1.000331275 | 0.39  | 0.848 | 3.63E-97    | GADD45B   | 3 | S100A8_TMo |
| 1376 | 4.42E-131 | -1.009886358 | 0.628 | 0.947 | 9.64E-127   | CTSB      | 3 | S100A8_TMo |
| 1377 | 7.89E-63  | -1.012018583 | 0.168 | 0.559 | 1.72E-58    | HSPA1B    | 3 | S100A8_TMo |
| 1378 | 8.39E-139 | -1.029648743 | 0.62  | 0.949 | 1.83E-134   | CD68      | 3 | S100A8_TMo |
| 1379 | 5.63E-115 | -1.034692079 | 0.237 | 0.765 | 1.23E-110   | CTSC      | 3 | S100A8_TMo |
| 1380 | 4.40E-45  | -1.075148539 | 0.164 | 0.47  | 9.59E-41    | IL1B      | 3 | S100A8_TMo |
| 1381 | 9.31E-143 | -1.082682304 | 0.162 | 0.757 | 2.03E-138   | HLA-DMA   | 3 | S100A8_TMo |
| 1382 | 4.26E-52  | -1.140235463 | 0.149 | 0.49  | 9.30E-48    | CXCL3     | 3 | S100A8_TMo |
| 1383 | 5.64E-78  | -1.192277175 | 0.189 | 0.627 | 1.23E-73    | DNAJB1    | 3 | S100A8_TMo |
| 1384 | 2.39E-122 | -1.225877716 | 0.267 | 0.787 | 5.22E-118   | HMOX1     | 3 | S100A8_TMo |
| 1385 | 3.24E-108 | -1.233495146 | 0.186 | 0.675 | 7.06E-104   | MS4A4A    | 3 | S100A8_TMo |
| 1386 | 5.16E-118 | -1.235341495 | 0.119 | 0.673 | 1.13E-113   | CTSL      | 3 | S100A8_TMo |
| 1387 | 1.60E-134 | -1.240699939 | 0.231 | 0.774 | 3.48E-130   | MS4A7     | 3 | S100A8_TMo |
| 1388 | 1.83E-59  | -1.280303116 | 0.177 | 0.541 | 3.98E-55    | CCL3      | 3 | S100A8_TMo |
| 1389 | 5.04E-62  | -1.311913201 | 0.128 | 0.507 | 1.10E-57    | HSPB1     | 3 | S100A8_TMo |
| 1390 | 2.90E-170 | -1.440009498 | 0.227 | 0.826 | 6.32E-166   | HLA-DQB1  | 3 | S100A8_TMo |
| 1391 | 6.90E-207 | -1.444609725 | 0.596 | 0.968 | 1.50E-202   | HLA-DRB1  | 3 | S100A8_TMo |
| 1392 | 9.45E-56  | -1.478677436 | 0.194 | 0.535 | 2.06E-51    | CCL4      | 3 | S100A8_TMo |
| 1393 | 7.64E-96  | -1.504531726 | 0.3   | 0.758 | 1.67E-91    | HSPA1A    | 3 | S100A8_TMo |
| 1394 | 2.01E-234 | -1.539491666 | 0.892 | 0.996 | 4.37E-230   | CD74      | 3 | S100A8_TMo |
| 1395 | 4.32E-227 | -1.575130411 | 0.667 | 0.982 | 9.41E-223   | HLA-DRA   | 3 | S100A8_TMo |
| 1396 | 3.16E-156 | -1.724554752 | 0.191 | 0.771 | 6.90E-152   | LIPA      | 3 | S100A8_TMo |
| 1397 | 2.92E-202 | -1.768795053 | 0.314 | 0.891 | 6.38E-198   | HLA-DPA1  | 3 | S100A8_TMo |
| 1398 | 9.95E-208 | -1.954010283 | 0.38  | 0.891 | 2.17E-203   | HLA-DRB5  | 3 | S100A8_TMo |
| 1399 | 3.30E-211 | -1.954278921 | 0.228 | 0.863 | 7.19E-207   | HLA-DPB1  | 3 | S100A8_TMo |
| 1400 | 1.30E-30  | 0.964506021  | 0.668 | 0.388 | 2.85E-26    | IL1B      | 4 | IL1B_KC    |
| 1401 | 1.40E-23  | 0.961308905  | 0.638 | 0.406 | 3.06E-19    | CXCL3     | 4 | IL1B_KC    |
| 1402 | 3.18E-64  | 0.874168552  | 0.967 | 0.814 | 6.93E-60    | IFITM3    | 4 | IL1B_KC    |
| 1403 | 1.28E-56  | 0.816597079  | 0.908 | 0.616 | 2.79E-52    | CD52      | 4 | IL1B_KC    |
| 1404 | 8.59E-18  | 0.706978322  | 0.739 | 0.532 | 1.87E-13    | CXCL2     | 4 | IL1B_KC    |
| 1405 | 2.18E-54  | 0.675841215  | 0.828 | 0.467 | 4.75E-50    | LILRB1    | 4 | IL1B_KC    |
| 1406 | 2.33E-50  | 0.669374141  | 0.908 | 0.633 | 5.07E-46    | LINC01272 | 4 | IL1B_KC    |
| 1407 | 1.10E-43  | 0.65118782   | 0.585 | 0.251 | 2.41E-39    | RHOC      | 4 | IL1B_KC    |
| 1408 | 1.71E-62  | 0.641296207  | 0.97  | 0.805 | 3.73E-58    | SERPINA1  | 4 | IL1B_KC    |
| 1409 | 4.85E-62  | 0.630611874  | 0.985 | 0.872 | 1.06E-57    | LST1      | 4 | IL1B_KC    |
| 1410 | 2.86E-56  | 0.625500647  | 0.95  | 0.531 | 6.24E-52    | FCGR3A    | 4 | IL1B_KC    |
| 1411 | 2.87E-08  | 0.597249262  | 0.605 | 0.458 | 0.000626351 | CCL4      | 4 | IL1B_KC    |
| 1412 | 1.05E-16  | 0.59711681   | 0.436 | 0.231 | 2.29E-12    | TNF       | 4 | IL1B_KC    |
| 1413 | 4.99E-37  | 0.595292024  | 0.95  | 0.688 | 1.09E-32    | BCL2A1    | 4 | IL1B_KC    |
| 1414 | 1.47E-35  | 0.571912067  | 0.819 | 0.498 | 3.20E-31    | NR4A1     | 4 | IL1B_KC    |
| 1415 | 3.15E-45  | 0.553976597  | 0.902 | 0.616 | 6.87E-41    | LILRB2    | 4 | IL1B_KC    |
| 1416 | 5.41E-29  | 0.544034513  | 0.958 | 0.852 | 1.18E-24    | IFITM2    | 4 | IL1B_KC    |
| 1417 | 5.44E-57  | 0.539691482  | 0.991 | 0.929 | 1.19E-52    | COTL1     | 4 | IL1B_KC    |
| 1418 | 4.87E-39  | 0.534522668  | 0.825 | 0.542 | 1.06E-34    | CD48      | 4 | IL1B_KC    |
| 1419 | 1.09E-28  | 0.532918885  | 0.813 | 0.569 | 2.38E-24    | NFKBIZ    | 4 | IL1B_KC    |
| 1420 | 1.14E-38  | 0.515829464  | 0.588 | 0.259 | 2.49E-34    | WARS      | 4 | IL1B_KC    |
| 1421 | 1.39E-38  | 0.503018871  | 0.662 | 0.329 | 3.04E-34    | LY6E      | 4 | IL1B_KC    |
| 1422 | 1.59E-07  | 0.480956884  | 0.136 | 0.063 | 0.003472895 | MIR155HG  | 4 | IL1B_KC    |
| 1423 | 6.00E-66  | 0.449951227  | 0.997 | 0.972 | 1.31E-61    | RPS19     | 4 | IL1B_KC    |

|      |          |             |       |       |             |               |   |         |
|------|----------|-------------|-------|-------|-------------|---------------|---|---------|
| 1424 | 6.48E-31 | 0.437489027 | 0.772 | 0.463 | 1.41E-26    | CNIH4         | 4 | IL1B_KC |
| 1425 | 6.43E-26 | 0.430224642 | 0.697 | 0.422 | 1.40E-21    | CYTIP         | 4 | IL1B_KC |
| 1426 | 4.52E-20 | 0.421698305 | 0.935 | 0.757 | 9.86E-16    | RHOB          | 4 | IL1B_KC |
| 1427 | 5.42E-26 | 0.410519632 | 0.739 | 0.471 | 1.18E-21    | PSME2         | 4 | IL1B_KC |
| 1428 | 2.33E-63 | 0.406776365 | 1     | 0.995 | 5.08E-59    | EEF1A1        | 4 | IL1B_KC |
| 1429 | 5.49E-32 | 0.40212008  | 0.57  | 0.261 | 1.20E-27    | TCF7L2        | 4 | IL1B_KC |
| 1430 | 7.53E-43 | 0.396481734 | 0.991 | 0.935 | 1.64E-38    | PSAP          | 4 | IL1B_KC |
| 1431 | 5.74E-25 | 0.395858093 | 0.875 | 0.612 | 1.25E-20    | NAP1L1        | 4 | IL1B_KC |
| 1432 | 4.32E-23 | 0.382590831 | 0.442 | 0.203 | 9.42E-19    | BIRC3         | 4 | IL1B_KC |
| 1433 | 6.49E-34 | 0.379500642 | 0.588 | 0.266 | 1.42E-29    | ICAM2         | 4 | IL1B_KC |
| 1434 | 1.31E-19 | 0.376859739 | 0.935 | 0.77  | 2.86E-15    | C5AR1         | 4 | IL1B_KC |
| 1435 | 3.90E-22 | 0.376802652 | 0.718 | 0.464 | 8.49E-18    | PSMB9         | 4 | IL1B_KC |
| 1436 | 2.44E-27 | 0.370035887 | 0.647 | 0.354 | 5.32E-23    | ITGA4         | 4 | IL1B_KC |
| 1437 | 2.68E-26 | 0.367968081 | 0.837 | 0.564 | 5.85E-22    | SLC7A7        | 4 | IL1B_KC |
| 1438 | 7.24E-25 | 0.367703159 | 0.772 | 0.524 | 1.58E-20    | ZNF706        | 4 | IL1B_KC |
| 1439 | 3.02E-26 | 0.363030571 | 0.843 | 0.561 | 6.58E-22    | CHCHD10       | 4 | IL1B_KC |
| 1440 | 1.41E-29 | 0.362475056 | 0.991 | 0.764 | 3.07E-25    | HLA-DPA1      | 4 | IL1B_KC |
| 1441 | 1.20E-16 | 0.35845787  | 0.697 | 0.484 | 2.62E-12    | VAMP5         | 4 | IL1B_KC |
| 1442 | 3.92E-08 | 0.355509577 | 0.516 | 0.367 | 0.000855161 | DUSP2         | 4 | IL1B_KC |
| 1443 | 2.21E-24 | 0.355454362 | 0.955 | 0.745 | 4.82E-20    | HSPA8         | 4 | IL1B_KC |
| 1444 | 2.29E-30 | 0.354823003 | 0.546 | 0.256 | 4.99E-26    | CAMK1         | 4 | IL1B_KC |
| 1445 | 2.54E-11 | 0.352260607 | 0.404 | 0.235 | 5.55E-07    | PTGS2         | 4 | IL1B_KC |
| 1446 | 3.28E-25 | 0.352133391 | 0.76  | 0.471 | 7.15E-21    | PILRA         | 4 | IL1B_KC |
| 1447 | 1.67E-21 | 0.350598088 | 0.445 | 0.22  | 3.64E-17    | PTGER4        | 4 | IL1B_KC |
| 1448 | 1.74E-35 | 0.345946381 | 0.988 | 0.89  | 3.80E-31    | YBX1          | 4 | IL1B_KC |
| 1449 | 8.85E-18 | 0.341092467 | 0.626 | 0.392 | 1.93E-13    | NAAA          | 4 | IL1B_KC |
| 1450 | 1.63E-15 | 0.340266031 | 0.78  | 0.558 | 3.55E-11    | CD83          | 4 | IL1B_KC |
| 1451 | 8.21E-29 | 0.337200879 | 0.442 | 0.183 | 1.79E-24    | SIDT2         | 4 | IL1B_KC |
| 1452 | 1.10E-23 | 0.337121087 | 0.585 | 0.309 | 2.41E-19    | 9-Sep         | 4 | IL1B_KC |
| 1453 | 3.40E-20 | 0.331972705 | 0.733 | 0.469 | 7.41E-16    | DOK2          | 4 | IL1B_KC |
| 1454 | 1.63E-25 | 0.326663331 | 0.579 | 0.295 | 3.54E-21    | ABI3          | 4 | IL1B_KC |
| 1455 | 1.13E-26 | 0.324134602 | 0.386 | 0.155 | 2.45E-22    | GPBAR1        | 4 | IL1B_KC |
| 1456 | 1.54E-18 | 0.322874803 | 0.347 | 0.158 | 3.37E-14    | FAM110A       | 4 | IL1B_KC |
| 1457 | 6.25E-19 | 0.321925214 | 0.893 | 0.645 | 1.36E-14    | CTSC          | 4 | IL1B_KC |
| 1458 | 3.83E-26 | 0.320580351 | 0.493 | 0.225 | 8.36E-22    | GCH1          | 4 | IL1B_KC |
| 1459 | 2.67E-20 | 0.319073956 | 0.703 | 0.432 | 5.82E-16    | MTSS1         | 4 | IL1B_KC |
| 1460 | 2.50E-22 | 0.317653882 | 0.947 | 0.776 | 5.44E-18    | SLC25A5       | 4 | IL1B_KC |
| 1461 | 4.54E-14 | 0.312018196 | 0.78  | 0.578 | 9.91E-10    | CXCR4         | 4 | IL1B_KC |
| 1462 | 1.04E-20 | 0.311351572 | 0.573 | 0.325 | 2.28E-16    | RAB24         | 4 | IL1B_KC |
| 1463 | 1.58E-25 | 0.3112194   | 0.896 | 0.659 | 3.45E-21    | CD37          | 4 | IL1B_KC |
| 1464 | 8.38E-24 | 0.311148949 | 0.51  | 0.25  | 1.83E-19    | EVL           | 4 | IL1B_KC |
| 1465 | 1.46E-16 | 0.310963515 | 0.611 | 0.36  | 3.18E-12    | ADGRE2        | 4 | IL1B_KC |
| 1466 | 9.98E-20 | 0.306937585 | 0.662 | 0.4   | 2.18E-15    | PAG1          | 4 | IL1B_KC |
| 1467 | 2.15E-28 | 0.306429937 | 0.267 | 0.078 | 4.70E-24    | RP11-362F19.1 | 4 | IL1B_KC |
| 1468 | 6.01E-18 | 0.305522147 | 0.724 | 0.479 | 1.31E-13    | LRRC25        | 4 | IL1B_KC |
| 1469 | 3.98E-20 | 0.305239093 | 0.688 | 0.425 | 8.67E-16    | STX11         | 4 | IL1B_KC |
| 1470 | 3.02E-32 | 0.303688204 | 0.997 | 0.957 | 6.60E-28    | AIF1          | 4 | IL1B_KC |
| 1471 | 1.88E-23 | 0.303638054 | 0.958 | 0.866 | 4.10E-19    | SLC25A6       | 4 | IL1B_KC |
| 1472 | 5.12E-12 | 0.302224482 | 0.43  | 0.254 | 1.12E-07    | PAPSS2        | 4 | IL1B_KC |
| 1473 | 1.22E-27 | 0.297870422 | 0.294 | 0.093 | 2.66E-23    | SLC2A6        | 4 | IL1B_KC |
| 1474 | 2.81E-15 | 0.295107739 | 0.534 | 0.324 | 6.13E-11    | PECAM1        | 4 | IL1B_KC |
| 1475 | 3.41E-24 | 0.291625571 | 0.985 | 0.721 | 7.44E-20    | HLA-DPB1      | 4 | IL1B_KC |
| 1476 | 6.67E-20 | 0.29150631  | 0.389 | 0.186 | 1.46E-15    | ADK           | 4 | IL1B_KC |
| 1477 | 1.46E-18 | 0.287504203 | 0.923 | 0.732 | 3.19E-14    | MT2A          | 4 | IL1B_KC |
| 1478 | 2.81E-19 | 0.285126632 | 0.638 | 0.375 | 6.12E-15    | BID           | 4 | IL1B_KC |
| 1479 | 6.43E-15 | 0.284307053 | 0.54  | 0.327 | 1.40E-10    | BIN2          | 4 | IL1B_KC |
| 1480 | 9.87E-16 | 0.282577423 | 0.504 | 0.283 | 2.15E-11    | FBP1          | 4 | IL1B_KC |
| 1481 | 2.79E-15 | 0.279664362 | 0.62  | 0.4   | 6.08E-11    | HN1           | 4 | IL1B_KC |
| 1482 | 5.93E-13 | 0.279567999 | 0.172 | 0.064 | 1.29E-08    | IFITM1        | 4 | IL1B_KC |
| 1483 | 3.83E-16 | 0.275066665 | 0.941 | 0.82  | 8.35E-12    | BTG1          | 4 | IL1B_KC |
| 1484 | 1.22E-18 | 0.274522767 | 0.953 | 0.843 | 2.67E-14    | PTPRC         | 4 | IL1B_KC |
| 1485 | 1.83E-06 | 0.273641739 | 0.944 | 0.885 | 0.039874317 | NFKBIA        | 4 | IL1B_KC |
| 1486 | 3.65E-23 | 0.272303004 | 0.454 | 0.21  | 7.96E-19    | LILRA1        | 4 | IL1B_KC |
| 1487 | 6.07E-16 | 0.270670482 | 0.864 | 0.666 | 1.32E-11    | PRELID1       | 4 | IL1B_KC |
| 1488 | 5.67E-11 | 0.270286596 | 0.914 | 0.724 | 1.24E-06    | PPP1R15A      | 4 | IL1B_KC |
| 1489 | 7.22E-21 | 0.269632838 | 0.24  | 0.082 | 1.57E-16    | SPN           | 4 | IL1B_KC |
| 1490 | 2.14E-17 | 0.268832714 | 0.843 | 0.603 | 4.67E-13    | CARD16        | 4 | IL1B_KC |
| 1491 | 1.15E-15 | 0.267082789 | 0.715 | 0.468 | 2.52E-11    | RNF144B       | 4 | IL1B_KC |
| 1492 | 7.50E-17 | 0.265751519 | 0.335 | 0.151 | 1.63E-12    | ISG20         | 4 | IL1B_KC |
| 1493 | 2.18E-07 | 0.264514027 | 0.769 | 0.632 | 0.004749854 | TXNIP         | 4 | IL1B_KC |
| 1494 | 7.57E-21 | 0.264108621 | 0.371 | 0.159 | 1.65E-16    | CDC42EP2      | 4 | IL1B_KC |
| 1495 | 5.63E-16 | 0.263901999 | 0.448 | 0.243 | 1.23E-11    | OAZ2          | 4 | IL1B_KC |
| 1496 | 6.57E-14 | 0.263471274 | 0.804 | 0.58  | 1.43E-09    | RAP1B         | 4 | IL1B_KC |
| 1497 | 3.22E-18 | 0.259375173 | 0.362 | 0.169 | 7.03E-14    | TBC1D8        | 4 | IL1B_KC |
| 1498 | 2.17E-16 | 0.259340866 | 0.763 | 0.492 | 4.73E-12    | FAM26F        | 4 | IL1B_KC |

|      |          |              |       |       |             |          |   |         |
|------|----------|--------------|-------|-------|-------------|----------|---|---------|
| 1499 | 1.34E-13 | 0.258582176  | 0.677 | 0.457 | 2.93E-09    | LILRA2   | 4 | IL1B_KC |
| 1500 | 4.60E-22 | 0.256520365  | 1     | 0.988 | 1.00E-17    | SAT1     | 4 | IL1B_KC |
| 1501 | 2.27E-15 | 0.255860906  | 0.789 | 0.575 | 4.94E-11    | TNFRSF1B | 4 | IL1B_KC |
| 1502 | 5.65E-13 | 0.253918364  | 0.688 | 0.484 | 1.23E-08    | CASP1    | 4 | IL1B_KC |
| 1503 | 2.06E-17 | 0.253514834  | 0.573 | 0.333 | 4.48E-13    | POU2F2   | 4 | IL1B_KC |
| 1504 | 3.48E-10 | 0.252016421  | 0.641 | 0.447 | 7.60E-06    | MCTP1    | 4 | IL1B_KC |
| 1505 | 8.26E-09 | -0.250400028 | 0.608 | 0.679 | 0.000180114 | TXN      | 4 | IL1B_KC |
| 1506 | 4.08E-14 | -0.26499366  | 0.994 | 0.994 | 8.89E-10    | MT-ND4   | 4 | IL1B_KC |
| 1507 | 1.58E-07 | -0.286282871 | 0.864 | 0.818 | 0.003446946 | GRN      | 4 | IL1B_KC |
| 1508 | 2.63E-08 | -0.305328338 | 0.151 | 0.285 | 0.000574085 | RGL1     | 4 | IL1B_KC |
| 1509 | 8.45E-09 | -0.313707853 | 0.591 | 0.653 | 0.000184316 | NAIP     | 4 | IL1B_KC |
| 1510 | 8.30E-09 | -0.313792919 | 0.825 | 0.779 | 0.000181088 | BLVRB    | 4 | IL1B_KC |
| 1511 | 2.75E-07 | -0.338950272 | 0.884 | 0.867 | 0.006003971 | MS4A6A   | 4 | IL1B_KC |
| 1512 | 6.47E-08 | -0.356730517 | 0.217 | 0.342 | 0.001411565 | DAB2     | 4 | IL1B_KC |
| 1513 | 7.70E-07 | -0.373308037 | 0.439 | 0.505 | 0.016788235 | CSF3R    | 4 | IL1B_KC |
| 1514 | 1.30E-11 | -0.379590753 | 0.777 | 0.8   | 2.83E-07    | CD14     | 4 | IL1B_KC |
| 1515 | 1.45E-06 | -0.383253805 | 0.884 | 0.826 | 0.031587505 | SERPINB1 | 4 | IL1B_KC |
| 1516 | 8.43E-08 | -0.394113292 | 0.356 | 0.452 | 0.00183788  | STOM     | 4 | IL1B_KC |
| 1517 | 1.81E-07 | -0.395495975 | 0.136 | 0.25  | 0.00395752  | ASPH     | 4 | IL1B_KC |
| 1518 | 1.05E-10 | -0.441637713 | 0.887 | 0.787 | 2.30E-06    | FCGRT    | 4 | IL1B_KC |
| 1519 | 1.03E-10 | -0.447961867 | 0.668 | 0.698 | 2.25E-06    | APLP2    | 4 | IL1B_KC |
| 1520 | 9.30E-25 | -0.448963385 | 0.899 | 0.894 | 2.03E-20    | CTSD     | 4 | IL1B_KC |
| 1521 | 3.40E-07 | -0.461376843 | 0.282 | 0.379 | 0.007415307 | CAPG     | 4 | IL1B_KC |
| 1522 | 2.26E-09 | -0.461935012 | 0.11  | 0.249 | 4.92E-05    | TMIGD3   | 4 | IL1B_KC |
| 1523 | 1.15E-12 | -0.467952433 | 0.243 | 0.415 | 2.52E-08    | STAB1    | 4 | IL1B_KC |
| 1524 | 3.34E-22 | -0.475830912 | 0.881 | 0.902 | 7.29E-18    | CD163    | 4 | IL1B_KC |
| 1525 | 1.69E-12 | -0.481479015 | 0.439 | 0.546 | 3.69E-08    | PLD3     | 4 | IL1B_KC |
| 1526 | 4.90E-14 | -0.494272156 | 0.988 | 0.983 | 1.07E-09    | GAPDH    | 4 | IL1B_KC |
| 1527 | 1.15E-09 | -0.521182994 | 0.43  | 0.531 | 2.51E-05    | HMGB2    | 4 | IL1B_KC |
| 1528 | 3.52E-14 | -0.536928237 | 0.703 | 0.749 | 7.69E-10    | ANXA1    | 4 | IL1B_KC |
| 1529 | 2.33E-13 | -0.539113308 | 0.62  | 0.661 | 5.08E-09    | CREG1    | 4 | IL1B_KC |
| 1530 | 8.04E-41 | -0.550503823 | 0.861 | 0.901 | 1.75E-36    | GPX1     | 4 | IL1B_KC |
| 1531 | 3.91E-11 | -0.553420589 | 0.202 | 0.346 | 8.53E-07    | MGST1    | 4 | IL1B_KC |
| 1532 | 7.22E-09 | -0.557267583 | 0.68  | 0.691 | 0.000157467 | MNDA     | 4 | IL1B_KC |
| 1533 | 3.71E-23 | -0.559211402 | 0.543 | 0.713 | 8.09E-19    | CD99     | 4 | IL1B_KC |
| 1534 | 4.71E-15 | -0.575099698 | 0.154 | 0.348 | 1.03E-10    | MRC1     | 4 | IL1B_KC |
| 1535 | 6.81E-11 | -0.749564173 | 0.208 | 0.348 | 1.48E-06    | SELL     | 4 | IL1B_KC |
| 1536 | 5.38E-18 | -0.783139421 | 0.427 | 0.626 | 1.17E-13    | THBS1    | 4 | IL1B_KC |
| 1537 | 5.98E-17 | -0.85360512  | 0.136 | 0.351 | 1.30E-12    | IL1R2    | 4 | IL1B_KC |
| 1538 | 1.18E-11 | -0.890878568 | 0.261 | 0.394 | 2.58E-07    | LGMN     | 4 | IL1B_KC |
| 1539 | 4.93E-23 | -0.964605784 | 0.982 | 0.963 | 1.08E-18    | LYZ      | 4 | IL1B_KC |
| 1540 | 8.63E-12 | -1.128986346 | 0.187 | 0.337 | 1.88E-07    | APOC1    | 4 | IL1B_KC |
| 1541 | 8.92E-22 | -1.228692567 | 0.142 | 0.386 | 1.94E-17    | SEPP1    | 4 | IL1B_KC |
| 1542 | 1.63E-16 | -1.31784614  | 0.264 | 0.433 | 3.56E-12    | SLC40A1  | 4 | IL1B_KC |
| 1543 | 1.21E-19 | -1.572939721 | 0.451 | 0.54  | 2.63E-15    | VCAN     | 4 | IL1B_KC |
| 1544 | 1.32E-09 | -1.720712173 | 0.932 | 0.88  | 2.88E-05    | S100A9   | 4 | IL1B_KC |
| 1545 | 7.06E-09 | -2.296292833 | 0.864 | 0.752 | 0.000153929 | S100A8   | 4 | IL1B_KC |
| 1546 | 2.25E-39 | -2.609308863 | 0.214 | 0.532 | 4.91E-35    | S100A12  | 4 | IL1B_KC |

**Table 4: List of DEGs of mononuclear phagocyte clusters in reperfusion stage (PR versus EP)**

List of differentially expressed genes of C1QC KC in reperfusion stage (PR versus EP)

| gene          | p val     | avg logFC    | pct.1 | pct.2 | p val adj |
|---------------|-----------|--------------|-------|-------|-----------|
| SOD2          | 2.77E-133 | 1.663902524  | 0.985 | 0.77  | 6.03E-129 |
| HSPD1         | 1.61E-114 | 2.02824182   | 0.937 | 0.602 | 3.51E-110 |
| SOCS3         | 2.70E-102 | 1.376352647  | 0.895 | 0.342 | 5.88E-98  |
| HSP90AA1      | 2.48E-97  | 1.461144222  | 0.983 | 0.943 | 5.42E-93  |
| HSPH1         | 2.69E-97  | 1.865338871  | 0.899 | 0.547 | 5.87E-93  |
| BAG3          | 3.97E-95  | 1.97348345   | 0.727 | 0.117 | 8.66E-91  |
| HSPE1         | 1.39E-91  | 1.679770254  | 0.918 | 0.693 | 3.02E-87  |
| CDKN1A        | 4.51E-91  | 1.307995537  | 0.908 | 0.5   | 9.85E-87  |
| HSPB1         | 1.65E-90  | 1.988087889  | 0.91  | 0.607 | 3.60E-86  |
| HSPA5         | 2.04E-90  | 1.475764387  | 0.924 | 0.627 | 4.45E-86  |
| G0S2          | 1.16E-89  | 2.052734071  | 0.739 | 0.127 | 2.53E-85  |
| BATF          | 1.37E-86  | 1.171877521  | 0.668 | 0.084 | 3.00E-82  |
| NAMPT         | 1.38E-85  | 1.080593087  | 0.96  | 0.785 | 3.02E-81  |
| AREG          | 1.19E-78  | 1.488394161  | 0.859 | 0.295 | 2.59E-74  |
| LITAF         | 6.09E-78  | 1.167239133  | 0.891 | 0.602 | 1.33E-73  |
| HSPA1A        | 3.88E-77  | 1.341964887  | 0.979 | 0.908 | 8.46E-73  |
| TMSB4X        | 1.32E-73  | -0.52927664  | 0.996 | 0.998 | 2.88E-69  |
| CTSL          | 3.95E-72  | 1.278804275  | 0.916 | 0.734 | 8.60E-68  |
| THBS1         | 5.83E-71  | 1.666782478  | 0.788 | 0.346 | 1.27E-66  |
| ICAM1         | 3.51E-70  | 1.390190688  | 0.83  | 0.445 | 7.65E-66  |
| DNAJA4        | 5.40E-70  | 1.398185803  | 0.59  | 0.076 | 1.18E-65  |
| SLC40A1       | 6.35E-69  | -1.296704709 | 0.62  | 0.9   | 1.38E-64  |
| H3F3B         | 3.60E-64  | 0.663794327  | 0.989 | 0.953 | 7.86E-60  |
| PIM1          | 1.07E-61  | 0.939824244  | 0.616 | 0.133 | 2.33E-57  |
| IL1RN         | 3.64E-60  | 1.465410564  | 0.58  | 0.104 | 7.94E-56  |
| SERPINB1      | 6.28E-59  | 0.940944904  | 0.889 | 0.732 | 1.37E-54  |
| ACSL1         | 8.01E-59  | 0.964477786  | 0.798 | 0.41  | 1.75E-54  |
| C15orf48      | 4.13E-58  | 1.410413553  | 0.504 | 0.055 | 9.01E-54  |
| SNHG15        | 4.63E-55  | 0.889744246  | 0.685 | 0.234 | 1.01E-50  |
| MT2A          | 8.38E-55  | 1.571875297  | 0.939 | 0.818 | 1.83E-50  |
| TXNIP         | 8.54E-55  | -0.871119844 | 0.504 | 0.863 | 1.86E-50  |
| GK            | 8.93E-52  | 0.950314842  | 0.712 | 0.297 | 1.95E-47  |
| PLAUR         | 1.55E-51  | 0.944651039  | 0.847 | 0.521 | 3.39E-47  |
| LMNA          | 1.09E-50  | 1.006340238  | 0.616 | 0.172 | 2.37E-46  |
| PDK4          | 6.32E-50  | -1.118541187 | 0.305 | 0.732 | 1.38E-45  |
| HSP90AB1      | 9.67E-50  | 0.847867885  | 0.954 | 0.859 | 2.11E-45  |
| GIMAP7        | 1.14E-49  | -0.712306486 | 0.061 | 0.484 | 2.48E-45  |
| LRG1          | 1.67E-49  | 0.830455226  | 0.418 | 0.031 | 3.63E-45  |
| IFNGR1        | 2.48E-49  | -0.77303641  | 0.622 | 0.891 | 5.40E-45  |
| SELK          | 1.29E-48  | 0.978108387  | 0.788 | 0.479 | 2.82E-44  |
| SLC7A5        | 2.13E-48  | 0.692983365  | 0.433 | 0.043 | 4.65E-44  |
| RP11-670E13.6 | 2.62E-48  | 0.952515889  | 0.607 | 0.188 | 5.72E-44  |
| MIR3945HG     | 7.88E-48  | 0.79327      | 0.393 | 0.023 | 1.72E-43  |
| RELB          | 1.21E-47  | 0.709255244  | 0.508 | 0.102 | 2.63E-43  |
| SAMSN1        | 1.75E-47  | 0.883626886  | 0.868 | 0.648 | 3.82E-43  |
| SLCO4A1       | 2.67E-47  | 0.724323727  | 0.46  | 0.066 | 5.82E-43  |
| MAP3K8        | 7.31E-47  | 0.754142294  | 0.866 | 0.627 | 1.59E-42  |
| PNRC1         | 1.02E-46  | 0.663766904  | 0.947 | 0.867 | 2.22E-42  |
| PAPSS2        | 4.12E-46  | 0.883443462  | 0.674 | 0.256 | 8.97E-42  |
| PIM3          | 8.98E-46  | 0.821071701  | 0.588 | 0.201 | 1.96E-41  |
| P2RY13        | 3.24E-45  | -0.738747992 | 0.124 | 0.547 | 7.06E-41  |
| PLSCR1        | 3.86E-45  | 0.798811653  | 0.775 | 0.459 | 8.41E-41  |
| ZFAND2A       | 8.96E-45  | 1.262070746  | 0.592 | 0.215 | 1.95E-40  |
| ABL2          | 1.20E-44  | 0.76777828   | 0.498 | 0.107 | 2.62E-40  |
| TNIP3         | 1.36E-43  | 0.796746531  | 0.328 | 0.004 | 2.96E-39  |
| DNAJB1        | 5.14E-43  | 1.137459899  | 0.884 | 0.699 | 1.12E-38  |
| CREM          | 1.80E-42  | 0.801157543  | 0.664 | 0.273 | 3.93E-38  |
| THBD          | 5.99E-42  | 0.884918659  | 0.546 | 0.164 | 1.31E-37  |
| PTH1          | 9.17E-42  | 0.432990869  | 1     | 1     | 2.00E-37  |
| PTPN1         | 1.50E-41  | 0.73896582   | 0.666 | 0.303 | 3.27E-37  |
| DNAJB6        | 1.81E-41  | 0.837782599  | 0.828 | 0.57  | 3.94E-37  |
| CALM2         | 2.64E-41  | -0.566978758 | 0.834 | 0.941 | 5.75E-37  |
| CACYBP        | 4.61E-41  | 0.899336052  | 0.714 | 0.408 | 1.00E-36  |
| C1QC          | 5.15E-40  | -0.440556564 | 0.956 | 0.971 | 1.12E-35  |
| FKBP4         | 6.61E-40  | 0.911001932  | 0.517 | 0.152 | 1.44E-35  |
| B4GALT5       | 3.02E-39  | 0.631880724  | 0.445 | 0.09  | 6.59E-35  |
| BCL3          | 3.48E-39  | 0.643141203  | 0.492 | 0.123 | 7.58E-35  |



|               |          |              |       |       |          |
|---------------|----------|--------------|-------|-------|----------|
| ADORA3        | 3.55E-39 | -0.558068286 | 0.057 | 0.416 | 7.75E-35 |
| DNAJA1        | 5.50E-39 | 0.773224579  | 0.847 | 0.654 | 1.20E-34 |
| PELI1         | 9.70E-39 | 0.849718373  | 0.739 | 0.469 | 2.12E-34 |
| ATP13A3       | 1.78E-38 | 0.724700285  | 0.521 | 0.158 | 3.88E-34 |
| NINJ1         | 2.38E-38 | 0.818048152  | 0.87  | 0.771 | 5.20E-34 |
| SAT1          | 4.99E-38 | 0.442326077  | 1     | 0.998 | 1.09E-33 |
| RPS29         | 7.97E-38 | 0.469013796  | 0.952 | 0.904 | 1.74E-33 |
| GIMAP4        | 1.03E-37 | -0.65166274  | 0.303 | 0.666 | 2.26E-33 |
| NFKB1         | 9.06E-37 | 0.811781171  | 0.569 | 0.23  | 1.98E-32 |
| SAMHD1        | 9.84E-37 | -0.611592292 | 0.519 | 0.807 | 2.15E-32 |
| BCL2A1        | 1.44E-36 | 0.741953013  | 0.815 | 0.51  | 3.13E-32 |
| UPP1          | 1.09E-35 | 0.698510379  | 0.735 | 0.434 | 2.38E-31 |
| PNP           | 1.55E-35 | 0.772175265  | 0.534 | 0.199 | 3.38E-31 |
| NFKB2         | 2.13E-35 | 0.621591853  | 0.466 | 0.123 | 4.65E-31 |
| FPR1          | 2.70E-35 | 0.696669612  | 0.733 | 0.459 | 5.89E-31 |
| SLC2A3        | 6.31E-35 | 0.767155325  | 0.628 | 0.25  | 1.38E-30 |
| CXCL10        | 6.97E-35 | 1.499526913  | 0.349 | 0.045 | 1.52E-30 |
| IRF1          | 9.94E-35 | 0.744942255  | 0.653 | 0.338 | 2.17E-30 |
| INSIG1        | 2.25E-33 | 0.812904807  | 0.704 | 0.381 | 4.91E-29 |
| CD44          | 3.84E-33 | 0.630456957  | 0.836 | 0.633 | 8.38E-29 |
| C1QB          | 4.60E-33 | -0.401959916 | 0.952 | 0.977 | 1.00E-28 |
| MAP2K3        | 8.30E-33 | 0.588099889  | 0.588 | 0.244 | 1.81E-28 |
| PDE4B         | 1.13E-32 | 0.651074244  | 0.584 | 0.242 | 2.47E-28 |
| FOSL2         | 1.18E-32 | 0.637617624  | 0.565 | 0.221 | 2.58E-28 |
| ARPC1B        | 1.53E-32 | -0.449263605 | 0.815 | 0.924 | 3.34E-28 |
| CCRL2         | 2.20E-32 | 0.693410933  | 0.508 | 0.188 | 4.81E-28 |
| CPVL          | 2.31E-32 | -0.636149172 | 0.571 | 0.807 | 5.04E-28 |
| TNFRSF10D     | 2.68E-32 | 0.535598226  | 0.334 | 0.043 | 5.84E-28 |
| EIF1          | 3.70E-32 | 0.305708777  | 0.998 | 0.994 | 8.06E-28 |
| SDC4          | 7.04E-32 | 0.627277266  | 0.336 | 0.045 | 1.53E-27 |
| HIF1A         | 9.13E-32 | 0.708566583  | 0.752 | 0.5   | 1.99E-27 |
| RP11-295G20.2 | 9.96E-32 | 0.586631257  | 0.351 | 0.057 | 2.17E-27 |
| EMP1          | 2.70E-31 | 0.762952425  | 0.387 | 0.084 | 5.89E-27 |
| MS4A7         | 1.13E-30 | -0.505931984 | 0.887 | 0.939 | 2.47E-26 |
| RNASE6        | 1.38E-30 | -0.573959894 | 0.634 | 0.834 | 3.01E-26 |
| GIMAP1        | 1.45E-30 | -0.513054693 | 0.174 | 0.508 | 3.17E-26 |
| CD55          | 1.45E-30 | 0.675177778  | 0.788 | 0.574 | 3.17E-26 |
| C1orf162      | 1.56E-30 | -0.458774784 | 0.807 | 0.93  | 3.40E-26 |
| EMP3          | 1.91E-30 | 0.622149483  | 0.872 | 0.77  | 4.17E-26 |
| DRAM1         | 2.62E-30 | 0.587909767  | 0.553 | 0.234 | 5.71E-26 |
| MS4A6A        | 2.77E-30 | -0.432990069 | 0.96  | 0.982 | 6.05E-26 |
| DEFA3         | 3.14E-30 | -0.526149679 | 0.036 | 0.316 | 6.84E-26 |
| ANXA1         | 7.41E-30 | 0.993482253  | 0.769 | 0.559 | 1.62E-25 |
| DDIT3         | 1.67E-29 | 0.619139645  | 0.605 | 0.281 | 3.64E-25 |
| SBNO2         | 3.40E-29 | 0.47922422   | 0.315 | 0.049 | 7.40E-25 |
| C5AR1         | 4.52E-29 | 0.607465332  | 0.882 | 0.732 | 9.85E-25 |
| GADD45B       | 7.71E-29 | 0.594494284  | 0.964 | 0.857 | 1.68E-24 |
| P4HA1         | 1.25E-28 | 0.609540284  | 0.532 | 0.23  | 2.73E-24 |
| B3GNT5        | 1.56E-28 | 0.597219553  | 0.395 | 0.1   | 3.39E-24 |
| TWISTNB       | 2.14E-28 | 0.895895037  | 0.481 | 0.184 | 4.66E-24 |
| ARID5A        | 2.21E-28 | 0.635543221  | 0.54  | 0.252 | 4.83E-24 |
| TRIM25        | 3.10E-28 | 0.559978441  | 0.393 | 0.104 | 6.76E-24 |
| WTAP          | 4.24E-28 | 0.680469759  | 0.632 | 0.375 | 9.24E-24 |
| PDE4DIP       | 8.36E-28 | 0.499999037  | 0.464 | 0.162 | 1.82E-23 |
| TXN           | 9.12E-28 | 0.869950333  | 0.805 | 0.648 | 1.99E-23 |
| ARL5B         | 9.87E-28 | 0.72842779   | 0.532 | 0.234 | 2.15E-23 |
| SEMA6B        | 1.06E-27 | 0.434184178  | 0.244 | 0.014 | 2.32E-23 |
| PVRL2         | 1.24E-27 | 0.564747359  | 0.542 | 0.242 | 2.70E-23 |
| SDF2L1        | 2.67E-27 | 0.559888651  | 0.569 | 0.264 | 5.82E-23 |
| BIRC3         | 4.07E-27 | 0.631737044  | 0.475 | 0.172 | 8.87E-23 |
| PPIF          | 6.03E-27 | 0.56562916   | 0.517 | 0.217 | 1.32E-22 |
| VAMP8         | 6.64E-27 | -0.408387699 | 0.828 | 0.922 | 1.45E-22 |
| DNAJB9        | 7.49E-27 | 0.563348371  | 0.557 | 0.26  | 1.63E-22 |
| ARHGDI8       | 1.73E-26 | -0.431041797 | 0.792 | 0.9   | 3.77E-22 |
| SDS           | 4.09E-26 | 1.055656422  | 0.433 | 0.146 | 8.92E-22 |
| CSF1R         | 5.72E-26 | -0.491091175 | 0.725 | 0.857 | 1.25E-21 |
| SPHK1         | 6.56E-26 | 0.417788394  | 0.286 | 0.045 | 1.43E-21 |
| ZFP36L1       | 6.76E-26 | -0.457491706 | 0.752 | 0.92  | 1.47E-21 |
| ZFP36L2       | 6.88E-26 | -0.53686472  | 0.601 | 0.852 | 1.50E-21 |
| TIMP1         | 8.10E-26 | 0.869098208  | 0.918 | 0.863 | 1.77E-21 |

|           |          |              |       |       |          |
|-----------|----------|--------------|-------|-------|----------|
| LDLR      | 1.61E-25 | 0.459664036  | 0.286 | 0.045 | 3.50E-21 |
| PFKFB3    | 2.00E-25 | 0.544814569  | 0.622 | 0.324 | 4.35E-21 |
| TM9SF2    | 2.29E-25 | -0.515388971 | 0.351 | 0.654 | 4.99E-21 |
| CTSS      | 8.63E-25 | -0.383096787 | 0.941 | 0.975 | 1.88E-20 |
| GPR34     | 9.07E-25 | -0.568956465 | 0.376 | 0.648 | 1.98E-20 |
| FGD2      | 9.99E-25 | -0.484948356 | 0.34  | 0.631 | 2.18E-20 |
| NUDC      | 1.08E-24 | 0.583509387  | 0.569 | 0.301 | 2.37E-20 |
| HES4      | 1.28E-24 | 0.472095297  | 0.214 | 0.012 | 2.79E-20 |
| MTHFD2    | 2.14E-24 | 0.595705472  | 0.628 | 0.395 | 4.67E-20 |
| KDM6B     | 2.40E-24 | 0.538132615  | 0.58  | 0.303 | 5.24E-20 |
| TUBA1C    | 6.84E-24 | 0.519510689  | 0.513 | 0.232 | 1.49E-19 |
| ETS2      | 8.25E-24 | 0.537127371  | 0.813 | 0.691 | 1.80E-19 |
| DDX21     | 9.39E-24 | 0.564784229  | 0.691 | 0.504 | 2.05E-19 |
| CXCR4     | 1.63E-23 | -0.607260365 | 0.498 | 0.754 | 3.54E-19 |
| PTPN2     | 1.80E-23 | 0.525353335  | 0.618 | 0.357 | 3.94E-19 |
| ABI3      | 1.81E-23 | -0.470468547 | 0.275 | 0.561 | 3.96E-19 |
| GABARAP   | 1.99E-23 | -0.323433045 | 0.956 | 0.977 | 4.33E-19 |
| TFRC      | 2.65E-23 | 0.679022266  | 0.437 | 0.17  | 5.78E-19 |
| CD163     | 2.73E-23 | -0.350404101 | 0.956 | 0.971 | 5.95E-19 |
| MYADM     | 5.58E-23 | 0.581586409  | 0.576 | 0.303 | 1.22E-18 |
| SERPINB9  | 6.57E-23 | 0.551877528  | 0.55  | 0.281 | 1.43E-18 |
| WASF2     | 8.98E-23 | -0.475461539 | 0.353 | 0.635 | 1.96E-18 |
| LDHA      | 9.10E-23 | 0.519579558  | 0.796 | 0.654 | 1.98E-18 |
| SLC25A37  | 1.06E-22 | 0.6315513    | 0.483 | 0.223 | 2.32E-18 |
| MAF       | 1.13E-22 | -0.521429434 | 0.529 | 0.789 | 2.47E-18 |
| SPIC      | 1.17E-22 | -0.541214643 | 0.17  | 0.451 | 2.54E-18 |
| LIPA      | 1.82E-22 | -0.53237123  | 0.889 | 0.945 | 3.97E-18 |
| FUCA1     | 2.58E-22 | -0.57278358  | 0.288 | 0.559 | 5.64E-18 |
| GPCPD1    | 3.73E-22 | 0.570068223  | 0.578 | 0.328 | 8.14E-18 |
| PPP1R15A  | 3.90E-22 | 0.482392052  | 0.891 | 0.695 | 8.50E-18 |
| MMP19     | 4.42E-22 | 0.892097229  | 0.45  | 0.189 | 9.64E-18 |
| EF1       | 5.46E-22 | 0.435105103  | 0.336 | 0.092 | 1.19E-17 |
| EZR       | 6.22E-22 | 0.60344131   | 0.576 | 0.328 | 1.36E-17 |
| MAFF      | 2.02E-21 | 0.490598945  | 0.378 | 0.125 | 4.40E-17 |
| FRMD4A    | 2.49E-21 | -0.386814696 | 0.126 | 0.393 | 5.43E-17 |
| RNF144B   | 2.67E-21 | 0.556155399  | 0.723 | 0.5   | 5.82E-17 |
| HSPA6     | 4.08E-21 | 1.382501599  | 0.464 | 0.229 | 8.89E-17 |
| MIDN      | 4.32E-21 | 0.461588699  | 0.632 | 0.359 | 9.42E-17 |
| XBP1      | 5.29E-21 | 0.488673072  | 0.748 | 0.531 | 1.15E-16 |
| STAT4     | 5.82E-21 | 0.324487759  | 0.183 | 0.01  | 1.27E-16 |
| DSE       | 6.43E-21 | 0.492692783  | 0.586 | 0.336 | 1.40E-16 |
| MXD1      | 8.01E-21 | 0.554783349  | 0.58  | 0.332 | 1.75E-16 |
| ARPC5     | 8.85E-21 | -0.397932464 | 0.782 | 0.879 | 1.93E-16 |
| TNFAIP8L2 | 9.65E-21 | -0.274694985 | 0.034 | 0.242 | 2.11E-16 |
| HHEX      | 1.17E-20 | -0.367648891 | 0.057 | 0.279 | 2.54E-16 |
| OLR1      | 1.36E-20 | 0.602820078  | 0.258 | 0.049 | 2.97E-16 |
| STIP1     | 1.39E-20 | 0.424754451  | 0.416 | 0.17  | 3.03E-16 |
| UGCG      | 1.49E-20 | 0.51077761   | 0.403 | 0.162 | 3.24E-16 |
| SESN1     | 2.83E-20 | -0.37434857  | 0.179 | 0.459 | 6.18E-16 |
| RAB27A    | 3.14E-20 | 0.371018176  | 0.239 | 0.041 | 6.86E-16 |
| LIMK2     | 3.86E-20 | 0.369782972  | 0.256 | 0.051 | 8.42E-16 |
| LRRFIP1   | 3.87E-20 | 0.49904115   | 0.811 | 0.662 | 8.44E-16 |
| DUSP1     | 4.40E-20 | -0.364592806 | 0.979 | 0.965 | 9.58E-16 |
| IRF2      | 4.41E-20 | -0.387571385 | 0.216 | 0.492 | 9.63E-16 |
| MRPL18    | 4.97E-20 | 0.597138728  | 0.489 | 0.266 | 1.08E-15 |
| MCTP2     | 5.20E-20 | 0.352115317  | 0.216 | 0.029 | 1.13E-15 |
| RBX1      | 6.04E-20 | -0.374730415 | 0.33  | 0.598 | 1.32E-15 |
| SLAMF1    | 7.10E-20 | 0.394764654  | 0.151 | 0     | 1.55E-15 |
| RGS1      | 8.17E-20 | -0.556470417 | 0.332 | 0.602 | 1.78E-15 |
| KLHL6     | 8.35E-20 | 0.380055103  | 0.324 | 0.094 | 1.82E-15 |
| ZFP36     | 8.67E-20 | 0.421662342  | 0.966 | 0.936 | 1.89E-15 |
| ODF3B     | 8.76E-20 | 0.469836575  | 0.523 | 0.277 | 1.91E-15 |
| TNFAIP3   | 1.48E-19 | 0.531080511  | 0.79  | 0.582 | 3.23E-15 |
| CMKLR1    | 1.99E-19 | -0.327520798 | 0.097 | 0.342 | 4.34E-15 |
| GBP2      | 2.07E-19 | 0.509533781  | 0.494 | 0.256 | 4.52E-15 |
| TAOK3     | 3.09E-19 | 0.538552395  | 0.666 | 0.477 | 6.73E-15 |
| AHSA1     | 4.46E-19 | 0.484150166  | 0.443 | 0.219 | 9.72E-15 |
| DNTTIP2   | 7.07E-19 | 0.481648887  | 0.422 | 0.199 | 1.54E-14 |
| REL       | 7.09E-19 | 0.498625206  | 0.79  | 0.652 | 1.55E-14 |
| FCGR3A    | 8.30E-19 | -0.351101773 | 0.847 | 0.93  | 1.81E-14 |

|                |          |              |       |       |          |
|----------------|----------|--------------|-------|-------|----------|
| CPM            | 8.68E-19 | -0.512219825 | 0.689 | 0.814 | 1.89E-14 |
| UBC            | 9.38E-19 | 0.428594563  | 0.975 | 0.924 | 2.05E-14 |
| ATF3           | 1.16E-18 | 0.443494579  | 0.695 | 0.441 | 2.54E-14 |
| FFAR3          | 1.38E-18 | 0.448086469  | 0.183 | 0.018 | 3.00E-14 |
| RGCC           | 1.54E-18 | 0.55371573   | 0.357 | 0.121 | 3.36E-14 |
| HBB            | 2.03E-18 | -0.622880943 | 0.12  | 0.354 | 4.43E-14 |
| AQP9           | 2.18E-18 | 0.419804248  | 0.197 | 0.025 | 4.74E-14 |
| DNAJB11        | 2.24E-18 | 0.440812784  | 0.506 | 0.268 | 4.89E-14 |
| LPAR6          | 2.74E-18 | -0.35084417  | 0.111 | 0.348 | 5.97E-14 |
| TMEM2          | 2.77E-18 | 0.444718331  | 0.412 | 0.172 | 6.04E-14 |
| CORO1A         | 3.01E-18 | -0.440602498 | 0.534 | 0.752 | 6.57E-14 |
| HAMP           | 3.48E-18 | 0.912556752  | 0.179 | 0.018 | 7.59E-14 |
| GCNT1          | 3.72E-18 | -0.351569623 | 0.084 | 0.305 | 8.12E-14 |
| EREG           | 3.89E-18 | 0.481314604  | 0.389 | 0.139 | 8.49E-14 |
| PHLDA2         | 4.36E-18 | 0.43795249   | 0.38  | 0.143 | 9.51E-14 |
| MIR155HG       | 4.63E-18 | 0.630885769  | 0.252 | 0.059 | 1.01E-13 |
| ADM            | 4.73E-18 | 0.584823573  | 0.599 | 0.35  | 1.03E-13 |
| RTEL1-TNFRSF6B | 4.75E-18 | 0.352111116  | 0.147 | 0.004 | 1.04E-13 |
| CD274          | 4.84E-18 | 0.280898365  | 0.147 | 0.004 | 1.05E-13 |
| STX11          | 4.97E-18 | 0.395513706  | 0.603 | 0.369 | 1.08E-13 |
| C10orf54       | 5.58E-18 | -0.360698724 | 0.672 | 0.844 | 1.22E-13 |
| TOM1           | 5.86E-18 | 0.429122837  | 0.439 | 0.209 | 1.28E-13 |
| IL4R           | 6.12E-18 | 0.416484922  | 0.313 | 0.104 | 1.34E-13 |
| RGS18          | 6.48E-18 | -0.298560177 | 0.181 | 0.441 | 1.41E-13 |
| PLIN2          | 7.79E-18 | 0.633290731  | 0.767 | 0.645 | 1.70E-13 |
| TRAPPC1        | 7.94E-18 | -0.405694866 | 0.357 | 0.609 | 1.73E-13 |
| DUSP2          | 8.37E-18 | 0.534957378  | 0.616 | 0.352 | 1.83E-13 |
| YBX3           | 9.10E-18 | 0.465460986  | 0.666 | 0.461 | 1.99E-13 |
| TRIM14         | 9.41E-18 | -0.289069142 | 0.084 | 0.307 | 2.05E-13 |
| ATP1B3         | 9.64E-18 | 0.64237124   | 0.687 | 0.537 | 2.10E-13 |
| GRN            | 1.21E-17 | -0.340481458 | 0.874 | 0.93  | 2.64E-13 |
| MRPS6          | 1.28E-17 | 0.537049209  | 0.511 | 0.287 | 2.79E-13 |
| MT1A           | 1.35E-17 | 0.681513378  | 0.139 | 0.002 | 2.95E-13 |
| NUCB1          | 1.37E-17 | 0.451654066  | 0.721 | 0.545 | 2.99E-13 |
| FOS            | 1.47E-17 | -0.343224659 | 0.943 | 0.977 | 3.20E-13 |
| NFIL3          | 1.64E-17 | 0.380864031  | 0.319 | 0.104 | 3.57E-13 |
| ARRDC3         | 2.08E-17 | 0.471552568  | 0.546 | 0.318 | 4.54E-13 |
| FPR2           | 2.17E-17 | 0.412871349  | 0.286 | 0.086 | 4.74E-13 |
| SLC16A10       | 2.92E-17 | 0.327134411  | 0.174 | 0.018 | 6.36E-13 |
| MCL1           | 3.86E-17 | 0.31556967   | 0.929 | 0.832 | 8.41E-13 |
| FRMD4B         | 3.89E-17 | -0.354993491 | 0.357 | 0.621 | 8.49E-13 |
| YPEL2          | 4.34E-17 | -0.320512578 | 0.111 | 0.34  | 9.47E-13 |
| GIMAP8         | 4.92E-17 | -0.313357404 | 0.099 | 0.318 | 1.07E-12 |
| STAT3          | 5.38E-17 | 0.429396291  | 0.611 | 0.396 | 1.17E-12 |
| NAIP           | 6.04E-17 | -0.336968223 | 0.658 | 0.805 | 1.32E-12 |
| CHMP1B         | 6.19E-17 | 0.540709959  | 0.754 | 0.584 | 1.35E-12 |
| NAPA           | 7.06E-17 | 0.497995402  | 0.666 | 0.49  | 1.54E-12 |
| RGS19          | 7.20E-17 | -0.363918585 | 0.271 | 0.523 | 1.57E-12 |
| ELL2           | 8.28E-17 | 0.502998113  | 0.597 | 0.385 | 1.81E-12 |
| EIF2AK3        | 9.08E-17 | 0.365582919  | 0.286 | 0.088 | 1.98E-12 |
| KLF4           | 9.44E-17 | 0.426478163  | 0.866 | 0.773 | 2.06E-12 |
| CSRNP1         | 9.71E-17 | 0.44610092   | 0.504 | 0.279 | 2.12E-12 |
| MAP2K1         | 1.03E-16 | 0.469795099  | 0.544 | 0.33  | 2.26E-12 |
| MERTK          | 1.13E-16 | -0.381418153 | 0.441 | 0.676 | 2.46E-12 |
| IRF5           | 1.24E-16 | -0.323282739 | 0.118 | 0.342 | 2.71E-12 |
| LMNB1          | 1.25E-16 | 0.286101238  | 0.214 | 0.043 | 2.73E-12 |
| GPBP1          | 1.27E-16 | 0.4341636    | 0.618 | 0.424 | 2.77E-12 |
| WBP5           | 1.30E-16 | 0.465114929  | 0.269 | 0.078 | 2.83E-12 |
| UQCR10         | 1.58E-16 | -0.343977047 | 0.641 | 0.809 | 3.44E-12 |
| MS4A4A         | 1.74E-16 | -0.357463845 | 0.84  | 0.9   | 3.79E-12 |
| FAM105A        | 2.85E-16 | -0.330501066 | 0.13  | 0.357 | 6.21E-12 |
| SCIMP          | 2.93E-16 | -0.392277796 | 0.275 | 0.51  | 6.38E-12 |
| APOBEC3A       | 3.04E-16 | 0.451478829  | 0.164 | 0.018 | 6.62E-12 |
| HSP90B1        | 3.09E-16 | 0.406350124  | 0.905 | 0.848 | 6.74E-12 |
| CH25H          | 3.29E-16 | 0.683699755  | 0.181 | 0.025 | 7.17E-12 |
| ZC3H12A        | 3.78E-16 | 0.408310718  | 0.357 | 0.146 | 8.25E-12 |
| HVCN1          | 3.95E-16 | -0.321672141 | 0.181 | 0.416 | 8.61E-12 |
| HMGN3          | 3.99E-16 | -0.372742371 | 0.353 | 0.604 | 8.70E-12 |
| ELOVL5         | 4.00E-16 | 0.412449575  | 0.454 | 0.242 | 8.72E-12 |
| APBB1IP        | 4.25E-16 | -0.383390598 | 0.468 | 0.672 | 9.26E-12 |

|          |          |              |       |       |          |
|----------|----------|--------------|-------|-------|----------|
| FEM1C    | 5.36E-16 | 0.359145876  | 0.292 | 0.098 | 1.17E-11 |
| MALAT1   | 5.81E-16 | 0.357154561  | 0.985 | 0.99  | 1.27E-11 |
| TNFAIP6  | 5.98E-16 | 0.507255373  | 0.206 | 0.041 | 1.30E-11 |
| OPTN     | 6.24E-16 | 0.266035248  | 0.145 | 0.01  | 1.36E-11 |
| PPT1     | 6.40E-16 | -0.383173678 | 0.59  | 0.789 | 1.40E-11 |
| MPEG1    | 6.76E-16 | -0.398479886 | 0.59  | 0.762 | 1.47E-11 |
| FLT1     | 6.87E-16 | 0.286291677  | 0.145 | 0.01  | 1.50E-11 |
| PHLDA1   | 6.89E-16 | 0.472269062  | 0.223 | 0.051 | 1.50E-11 |
| SAV1     | 7.44E-16 | 0.33868114   | 0.235 | 0.057 | 1.62E-11 |
| CD83     | 7.64E-16 | 0.446770632  | 0.836 | 0.633 | 1.67E-11 |
| GPR84    | 7.72E-16 | 0.268822875  | 0.168 | 0.021 | 1.68E-11 |
| KIAA1551 | 7.80E-16 | -0.30029911  | 0.09  | 0.301 | 1.70E-11 |
| ADGRE2   | 8.83E-16 | 0.494171198  | 0.601 | 0.4   | 1.93E-11 |
| AIF1     | 8.98E-16 | -0.265711367 | 0.966 | 0.977 | 1.96E-11 |
| ELMSAN1  | 1.02E-15 | 0.43378807   | 0.353 | 0.146 | 2.21E-11 |
| NDRG1    | 1.04E-15 | 0.360811085  | 0.336 | 0.133 | 2.26E-11 |
| HELZ     | 1.07E-15 | -0.327321342 | 0.21  | 0.449 | 2.33E-11 |
| LRP1     | 1.18E-15 | -0.365815465 | 0.336 | 0.578 | 2.58E-11 |
| EHD1     | 1.26E-15 | 0.381347165  | 0.353 | 0.152 | 2.75E-11 |
| FYB      | 1.38E-15 | -0.329485946 | 0.744 | 0.867 | 3.00E-11 |
| TUBB4B   | 1.43E-15 | 0.434450863  | 0.563 | 0.342 | 3.12E-11 |
| HLA-DPA1 | 1.48E-15 | -0.305281185 | 0.96  | 0.984 | 3.23E-11 |
| CLIC4    | 1.57E-15 | 0.328371667  | 0.351 | 0.145 | 3.42E-11 |
| DNMBP    | 2.02E-15 | 0.328949846  | 0.212 | 0.047 | 4.40E-11 |
| PPARD    | 2.31E-15 | 0.257325152  | 0.227 | 0.053 | 5.04E-11 |
| TCP1     | 2.47E-15 | 0.439119758  | 0.586 | 0.398 | 5.38E-11 |
| RALGDS   | 3.40E-15 | 0.362037065  | 0.269 | 0.084 | 7.41E-11 |
| SERPINH1 | 3.46E-15 | 0.400333781  | 0.151 | 0.016 | 7.55E-11 |
| MAP3K1   | 3.59E-15 | -0.300420307 | 0.128 | 0.344 | 7.82E-11 |
| CREB5    | 4.86E-15 | 0.374117326  | 0.273 | 0.088 | 1.06E-10 |
| GMFG     | 6.65E-15 | -0.355121893 | 0.59  | 0.748 | 1.45E-10 |
| ARID1A   | 8.56E-15 | -0.326655894 | 0.13  | 0.34  | 1.87E-10 |
| KCTD12   | 9.84E-15 | -0.384185053 | 0.433 | 0.676 | 2.15E-10 |
| GNA13    | 1.04E-14 | 0.38720939   | 0.529 | 0.312 | 2.27E-10 |
| RASGEF1B | 1.20E-14 | 0.392487494  | 0.584 | 0.387 | 2.61E-10 |
| PTPN6    | 1.26E-14 | -0.353337756 | 0.471 | 0.678 | 2.74E-10 |
| CCL18    | 1.27E-14 | 0.849474372  | 0.139 | 0.012 | 2.78E-10 |
| AZIN1    | 1.36E-14 | 0.40573207   | 0.571 | 0.377 | 2.97E-10 |
| LUCAT1   | 1.45E-14 | 0.265743903  | 0.172 | 0.027 | 3.15E-10 |
| DOCK8    | 1.56E-14 | -0.326232927 | 0.265 | 0.498 | 3.40E-10 |
| ISG20    | 1.59E-14 | 0.412814499  | 0.313 | 0.123 | 3.48E-10 |
| IL1B     | 2.58E-14 | 0.659868913  | 0.576 | 0.35  | 5.62E-10 |
| VIM      | 2.60E-14 | 0.287006402  | 0.983 | 0.986 | 5.67E-10 |
| PIGA     | 3.08E-14 | 0.370624619  | 0.237 | 0.07  | 6.71E-10 |
| CHSY1    | 3.09E-14 | 0.272026496  | 0.271 | 0.088 | 6.75E-10 |
| NEDD8    | 3.35E-14 | -0.363635416 | 0.454 | 0.668 | 7.31E-10 |
| LAP3     | 4.15E-14 | 0.365433687  | 0.637 | 0.477 | 9.04E-10 |
| GPR65    | 4.31E-14 | -0.325651968 | 0.382 | 0.623 | 9.40E-10 |
| SULT1A1  | 4.49E-14 | -0.375260777 | 0.41  | 0.625 | 9.79E-10 |
| CD84     | 5.35E-14 | -0.411457688 | 0.376 | 0.588 | 1.17E-09 |
| BAZ1A    | 5.75E-14 | 0.471625485  | 0.605 | 0.443 | 1.25E-09 |
| AKR1A1   | 6.02E-14 | -0.351350469 | 0.414 | 0.627 | 1.31E-09 |
| MAPK6    | 6.57E-14 | 0.337530823  | 0.332 | 0.143 | 1.43E-09 |
| ZNF106   | 6.74E-14 | -0.355995655 | 0.239 | 0.463 | 1.47E-09 |
| KMO      | 8.23E-14 | 0.455800347  | 0.351 | 0.158 | 1.80E-09 |
| GLIPR1   | 9.01E-14 | -0.360390982 | 0.55  | 0.725 | 1.97E-09 |
| RABGEF1  | 9.23E-14 | 0.252197149  | 0.202 | 0.049 | 2.01E-09 |
| RBPJ     | 9.29E-14 | -0.34706586  | 0.46  | 0.682 | 2.03E-09 |
| BTG3     | 1.14E-13 | 0.270740998  | 0.267 | 0.09  | 2.48E-09 |
| SLC3A2   | 1.14E-13 | 0.367490192  | 0.674 | 0.502 | 2.48E-09 |
| PHACTR1  | 1.15E-13 | 0.396126862  | 0.481 | 0.277 | 2.51E-09 |
| IRAK2    | 1.26E-13 | 0.258360884  | 0.185 | 0.039 | 2.74E-09 |
| PTP4A1   | 1.28E-13 | 0.433301845  | 0.59  | 0.4   | 2.78E-09 |
| SNX6     | 1.29E-13 | -0.347633229 | 0.645 | 0.795 | 2.81E-09 |
| SOCS1    | 1.39E-13 | 0.264234086  | 0.244 | 0.074 | 3.02E-09 |
| PLK3     | 1.43E-13 | 0.34731622   | 0.37  | 0.178 | 3.11E-09 |
| CSK      | 1.45E-13 | -0.312599574 | 0.254 | 0.479 | 3.16E-09 |
| MIS18BP1 | 1.45E-13 | -0.302175153 | 0.204 | 0.424 | 3.16E-09 |
| FAM107B  | 1.49E-13 | 0.379141259  | 0.33  | 0.145 | 3.25E-09 |
| METRNL   | 1.56E-13 | 0.3301511    | 0.317 | 0.131 | 3.40E-09 |

|             |          |              |       |       |          |
|-------------|----------|--------------|-------|-------|----------|
| TMEM37      | 1.58E-13 | -0.33040519  | 0.244 | 0.465 | 3.45E-09 |
| FAM49A      | 1.61E-13 | 0.355571886  | 0.603 | 0.412 | 3.52E-09 |
| DNAAF1      | 1.73E-13 | 0.308992656  | 0.134 | 0.014 | 3.77E-09 |
| HIVEP1      | 1.78E-13 | 0.289352984  | 0.233 | 0.068 | 3.89E-09 |
| LAMTOR4     | 1.89E-13 | -0.294225849 | 0.695 | 0.859 | 4.12E-09 |
| GABARAPL2   | 1.97E-13 | -0.284884011 | 0.401 | 0.633 | 4.30E-09 |
| ABRACL      | 2.03E-13 | -0.346895295 | 0.58  | 0.766 | 4.42E-09 |
| SLC2A6      | 2.16E-13 | 0.281315916  | 0.2   | 0.051 | 4.71E-09 |
| GIMAP2      | 2.69E-13 | -0.320804756 | 0.195 | 0.408 | 5.87E-09 |
| UBAP1       | 2.74E-13 | 0.320458419  | 0.334 | 0.15  | 5.98E-09 |
| VEGFA       | 3.42E-13 | 0.346209036  | 0.288 | 0.109 | 7.45E-09 |
| NANS        | 3.58E-13 | 0.394475488  | 0.563 | 0.398 | 7.81E-09 |
| ID2         | 3.59E-13 | -0.377240969 | 0.672 | 0.799 | 7.83E-09 |
| NSL1        | 3.65E-13 | -0.308386188 | 0.193 | 0.41  | 7.96E-09 |
| ADGRE5      | 3.78E-13 | 0.461901322  | 0.632 | 0.492 | 8.25E-09 |
| ADAP2       | 3.88E-13 | -0.363473374 | 0.456 | 0.648 | 8.46E-09 |
| ATP2A2      | 4.03E-13 | 0.367318392  | 0.487 | 0.293 | 8.79E-09 |
| OTUD1       | 4.21E-13 | 0.439875392  | 0.393 | 0.205 | 9.18E-09 |
| PDE4A       | 4.54E-13 | 0.324534634  | 0.261 | 0.096 | 9.90E-09 |
| CALR        | 4.56E-13 | 0.329443707  | 0.84  | 0.768 | 9.94E-09 |
| DDX17       | 4.59E-13 | -0.324898776 | 0.422 | 0.643 | 1.00E-08 |
| ATP1A1      | 5.23E-13 | 0.406576526  | 0.565 | 0.375 | 1.14E-08 |
| ST8SIA4     | 5.39E-13 | -0.306681507 | 0.191 | 0.41  | 1.18E-08 |
| HCLS1       | 5.40E-13 | -0.272392643 | 0.874 | 0.912 | 1.18E-08 |
| RAPGEF1     | 5.74E-13 | 0.30770165   | 0.271 | 0.104 | 1.25E-08 |
| SNN         | 6.09E-13 | 0.311646748  | 0.315 | 0.133 | 1.33E-08 |
| HLA-DMB     | 6.91E-13 | -0.333356883 | 0.496 | 0.719 | 1.51E-08 |
| PYCARD      | 7.08E-13 | -0.286798536 | 0.721 | 0.859 | 1.54E-08 |
| NCKAP1L     | 7.09E-13 | -0.364012622 | 0.332 | 0.531 | 1.55E-08 |
| SFT2D2      | 7.53E-13 | -0.311830242 | 0.212 | 0.43  | 1.64E-08 |
| POLD4       | 7.55E-13 | -0.34160001  | 0.359 | 0.566 | 1.65E-08 |
| MAT2B       | 8.08E-13 | -0.34060409  | 0.246 | 0.455 | 1.76E-08 |
| LSM6        | 9.40E-13 | -0.332340486 | 0.191 | 0.396 | 2.05E-08 |
| METTL7A     | 1.00E-12 | -0.341265142 | 0.372 | 0.59  | 2.19E-08 |
| SPOP        | 1.12E-12 | -0.258834695 | 0.103 | 0.283 | 2.43E-08 |
| TNFSF10     | 1.18E-12 | -0.254231339 | 0.116 | 0.303 | 2.57E-08 |
| HERPUD1     | 1.23E-12 | 0.328525858  | 0.882 | 0.836 | 2.68E-08 |
| ADCY7       | 1.30E-12 | -0.296600592 | 0.164 | 0.375 | 2.83E-08 |
| MANF        | 1.32E-12 | 0.352181964  | 0.408 | 0.211 | 2.88E-08 |
| MIR22HG     | 1.33E-12 | 0.33880048   | 0.319 | 0.139 | 2.91E-08 |
| XRCC5       | 1.34E-12 | -0.332808075 | 0.319 | 0.525 | 2.91E-08 |
| MIR4435-2HG | 1.43E-12 | 0.400429756  | 0.38  | 0.195 | 3.12E-08 |
| SCP2        | 1.45E-12 | -0.307848466 | 0.401 | 0.625 | 3.15E-08 |
| PTX3        | 1.45E-12 | 0.444414755  | 0.16  | 0.029 | 3.16E-08 |
| RHOBTB1     | 1.49E-12 | -0.266320792 | 0.069 | 0.232 | 3.25E-08 |
| STAB1       | 1.50E-12 | -0.397484054 | 0.391 | 0.594 | 3.26E-08 |
| PTGES3      | 1.68E-12 | 0.451265501  | 0.824 | 0.779 | 3.65E-08 |
| PHKB        | 1.70E-12 | -0.279163717 | 0.105 | 0.283 | 3.70E-08 |
| MRPS18B     | 1.74E-12 | -0.260911052 | 0.132 | 0.326 | 3.80E-08 |
| GCLC        | 1.87E-12 | -0.289246303 | 0.164 | 0.363 | 4.08E-08 |
| ATM         | 1.96E-12 | -0.293060445 | 0.195 | 0.406 | 4.28E-08 |
| SLCO2B1     | 2.44E-12 | -0.336993469 | 0.311 | 0.525 | 5.33E-08 |
| RNF135      | 2.49E-12 | -0.278137632 | 0.197 | 0.402 | 5.43E-08 |
| CTSZ        | 2.55E-12 | 0.423433185  | 0.739 | 0.627 | 5.56E-08 |
| RCSD1       | 2.66E-12 | -0.308029784 | 0.317 | 0.531 | 5.79E-08 |
| PNPLA8      | 3.12E-12 | 0.388900033  | 0.479 | 0.291 | 6.80E-08 |
| WARS        | 3.12E-12 | 0.420219524  | 0.412 | 0.236 | 6.80E-08 |
| IGSF6       | 3.24E-12 | -0.378066817 | 0.693 | 0.832 | 7.06E-08 |
| CDKN1B      | 3.28E-12 | -0.316813569 | 0.279 | 0.486 | 7.15E-08 |
| TCF7L2      | 3.44E-12 | -0.380445029 | 0.284 | 0.484 | 7.49E-08 |
| NEAT1       | 3.47E-12 | 0.264577708  | 0.979 | 0.967 | 7.58E-08 |
| KRCC1       | 3.54E-12 | -0.250947886 | 0.149 | 0.348 | 7.72E-08 |
| FLI1        | 3.63E-12 | -0.320353314 | 0.256 | 0.463 | 7.92E-08 |
| FCGR1A      | 3.73E-12 | 0.402722161  | 0.567 | 0.391 | 8.14E-08 |
| RSF1        | 3.92E-12 | -0.258053218 | 0.147 | 0.346 | 8.55E-08 |
| KCNK6       | 4.03E-12 | -0.285825954 | 0.09  | 0.26  | 8.78E-08 |
| SCAMP2      | 4.13E-12 | -0.303213928 | 0.313 | 0.529 | 9.01E-08 |
| HMG2        | 4.29E-12 | -0.352033293 | 0.708 | 0.83  | 9.36E-08 |
| MT-ATP8     | 4.41E-12 | 0.287188035  | 0.985 | 0.967 | 9.61E-08 |
| FAM26F      | 4.43E-12 | -0.293667598 | 0.714 | 0.818 | 9.66E-08 |

|          |          |              |       |       |          |
|----------|----------|--------------|-------|-------|----------|
| GLUL     | 4.43E-12 | 0.381636096  | 0.945 | 0.943 | 9.67E-08 |
| NPEPPS   | 4.96E-12 | -0.291185788 | 0.151 | 0.338 | 1.08E-07 |
| CCNL1    | 4.98E-12 | 0.377168391  | 0.779 | 0.643 | 1.09E-07 |
| SAA1     | 5.05E-12 | 0.485254598  | 0.244 | 0.09  | 1.10E-07 |
| FAM96A   | 5.62E-12 | -0.313513248 | 0.5   | 0.693 | 1.23E-07 |
| MBOAT7   | 5.91E-12 | 0.305219897  | 0.286 | 0.119 | 1.29E-07 |
| GNPDA1   | 6.26E-12 | -0.341028199 | 0.248 | 0.455 | 1.36E-07 |
| SLC38A10 | 6.71E-12 | -0.264797041 | 0.13  | 0.312 | 1.46E-07 |
| UTRN     | 7.02E-12 | -0.35704813  | 0.426 | 0.609 | 1.53E-07 |
| TRIB1    | 7.74E-12 | 0.376828193  | 0.479 | 0.287 | 1.69E-07 |
| WWP1     | 7.81E-12 | -0.302189695 | 0.244 | 0.453 | 1.70E-07 |
| SYAP1    | 7.84E-12 | 0.401836924  | 0.502 | 0.32  | 1.71E-07 |
| DUSP6    | 9.07E-12 | -0.295044102 | 0.42  | 0.637 | 1.98E-07 |
| NRP2     | 9.66E-12 | 0.299296121  | 0.261 | 0.098 | 2.11E-07 |
| ANKRD28  | 1.00E-11 | 0.272490551  | 0.231 | 0.078 | 2.19E-07 |
| LACTB    | 1.06E-11 | 0.328663577  | 0.418 | 0.24  | 2.32E-07 |
| EPN1     | 1.15E-11 | -0.32374619  | 0.361 | 0.559 | 2.51E-07 |
| ABCC5    | 1.16E-11 | -0.317445678 | 0.229 | 0.424 | 2.53E-07 |
| STX10    | 1.28E-11 | -0.266775602 | 0.185 | 0.383 | 2.80E-07 |
| KPNB1    | 1.32E-11 | -0.287514952 | 0.307 | 0.516 | 2.88E-07 |
| IL10     | 1.37E-11 | 0.626453509  | 0.328 | 0.154 | 2.98E-07 |
| TCEB1    | 1.50E-11 | 0.386579465  | 0.607 | 0.459 | 3.27E-07 |
| LBR      | 1.65E-11 | -0.330844011 | 0.204 | 0.389 | 3.60E-07 |
| TREM1    | 1.76E-11 | 0.295175833  | 0.275 | 0.111 | 3.85E-07 |
| ZC3HAV1  | 1.78E-11 | 0.408393364  | 0.477 | 0.297 | 3.88E-07 |
| TMEM70   | 1.96E-11 | 0.356695298  | 0.441 | 0.277 | 4.28E-07 |
| FCGR2A   | 2.03E-11 | 0.392800708  | 0.59  | 0.424 | 4.43E-07 |
| LEPROT   | 2.07E-11 | -0.321188851 | 0.328 | 0.525 | 4.51E-07 |
| CCL3L3   | 2.08E-11 | -0.598627452 | 0.34  | 0.521 | 4.55E-07 |
| SNX17    | 2.29E-11 | -0.296054363 | 0.267 | 0.455 | 5.00E-07 |
| ZBTB43   | 2.59E-11 | 0.292229381  | 0.254 | 0.1   | 5.64E-07 |
| PSMB10   | 2.59E-11 | -0.269108658 | 0.292 | 0.5   | 5.65E-07 |
| MT1E     | 2.86E-11 | 0.675723438  | 0.296 | 0.127 | 6.23E-07 |
| HSPA4    | 2.91E-11 | 0.428059655  | 0.441 | 0.285 | 6.35E-07 |
| MT1F     | 2.96E-11 | 0.322408093  | 0.187 | 0.053 | 6.45E-07 |
| MPHOSPH6 | 3.08E-11 | 0.32188055   | 0.279 | 0.125 | 6.72E-07 |
| RIPK2    | 3.08E-11 | 0.381291597  | 0.41  | 0.248 | 6.72E-07 |
| GSTP1    | 3.09E-11 | -0.307066072 | 0.824 | 0.906 | 6.75E-07 |
| LYZ      | 3.30E-11 | -0.285429889 | 0.897 | 0.949 | 7.20E-07 |
| MYO1G    | 3.32E-11 | 0.316619349  | 0.351 | 0.178 | 7.24E-07 |
| IL10RA   | 3.37E-11 | -0.273727245 | 0.473 | 0.658 | 7.34E-07 |
| EIF5     | 3.44E-11 | 0.316775164  | 0.758 | 0.668 | 7.51E-07 |
| FAM120A  | 3.56E-11 | -0.262133651 | 0.29  | 0.494 | 7.77E-07 |
| PRKCD    | 3.61E-11 | -0.254465794 | 0.149 | 0.332 | 7.88E-07 |
| USP36    | 3.61E-11 | 0.337225925  | 0.282 | 0.123 | 7.88E-07 |
| PAPD5    | 4.05E-11 | 0.326450856  | 0.29  | 0.129 | 8.83E-07 |
| MLKL     | 4.18E-11 | 0.347347156  | 0.246 | 0.096 | 9.11E-07 |
| SRGN     | 4.20E-11 | 0.267080594  | 0.985 | 0.986 | 9.16E-07 |
| LCP2     | 4.23E-11 | 0.381705132  | 0.815 | 0.762 | 9.22E-07 |
| PPP1CB   | 4.37E-11 | 0.359988943  | 0.639 | 0.516 | 9.53E-07 |
| SLC8B1   | 4.78E-11 | 0.324568087  | 0.414 | 0.23  | 1.04E-06 |
| PLA2G15  | 4.80E-11 | -0.255543206 | 0.118 | 0.287 | 1.05E-06 |
| UBE2D3   | 4.98E-11 | 0.257289038  | 0.863 | 0.828 | 1.09E-06 |
| MTHFR    | 5.41E-11 | 0.337892676  | 0.431 | 0.262 | 1.18E-06 |
| JUND     | 5.50E-11 | 0.430022854  | 0.704 | 0.559 | 1.20E-06 |
| FABP5    | 7.38E-11 | 0.507374372  | 0.758 | 0.646 | 1.61E-06 |
| NARS     | 8.08E-11 | -0.253003079 | 0.181 | 0.369 | 1.76E-06 |
| ZNF267   | 8.31E-11 | 0.330650045  | 0.401 | 0.229 | 1.81E-06 |
| RREB1    | 8.60E-11 | -0.257299235 | 0.103 | 0.268 | 1.88E-06 |
| LST1     | 9.16E-11 | -0.270866689 | 0.889 | 0.93  | 2.00E-06 |
| MRPS34   | 9.40E-11 | -0.264744406 | 0.235 | 0.436 | 2.05E-06 |
| NFE2L2   | 1.01E-10 | 0.383748352  | 0.721 | 0.623 | 2.19E-06 |
| TMBIM4   | 1.02E-10 | -0.277481252 | 0.567 | 0.738 | 2.22E-06 |
| TNFRSF21 | 1.04E-10 | 0.330966086  | 0.353 | 0.184 | 2.26E-06 |
| CD164    | 1.04E-10 | -0.318660265 | 0.718 | 0.83  | 2.27E-06 |
| FAM177A1 | 1.07E-10 | 0.359707513  | 0.435 | 0.285 | 2.32E-06 |
| DYNLL1   | 1.09E-10 | -0.286068656 | 0.653 | 0.791 | 2.37E-06 |
| TALDO1   | 1.10E-10 | -0.290399193 | 0.513 | 0.686 | 2.40E-06 |
| PARP14   | 1.17E-10 | -0.273561258 | 0.225 | 0.414 | 2.54E-06 |
| AGO2     | 1.24E-10 | 0.253681492  | 0.256 | 0.104 | 2.71E-06 |

|            |          |              |       |       |          |
|------------|----------|--------------|-------|-------|----------|
| RAB5A      | 1.39E-10 | 0.306639796  | 0.471 | 0.311 | 3.02E-06 |
| GLIPR2     | 1.40E-10 | 0.299945666  | 0.319 | 0.158 | 3.06E-06 |
| GSTK1      | 1.41E-10 | -0.284469833 | 0.674 | 0.797 | 3.07E-06 |
| ARFGAP3    | 1.51E-10 | 0.269195326  | 0.34  | 0.178 | 3.30E-06 |
| BTF3L4     | 1.70E-10 | -0.277422717 | 0.357 | 0.549 | 3.70E-06 |
| RILPL2     | 1.76E-10 | 0.347766969  | 0.605 | 0.475 | 3.84E-06 |
| LIMD2      | 1.77E-10 | -0.307340313 | 0.504 | 0.66  | 3.86E-06 |
| IGLV2-14   | 2.13E-10 | -0.323272468 | 0.137 | 0.307 | 4.63E-06 |
| TGOLN2     | 2.13E-10 | -0.307000387 | 0.319 | 0.508 | 4.63E-06 |
| MRPL57     | 2.25E-10 | -0.251259983 | 0.298 | 0.494 | 4.90E-06 |
| FPR3       | 2.29E-10 | -0.312943522 | 0.164 | 0.336 | 5.00E-06 |
| BCL2L11    | 2.38E-10 | 0.308258195  | 0.271 | 0.121 | 5.19E-06 |
| HSPA8      | 2.41E-10 | 0.43449029   | 0.903 | 0.92  | 5.26E-06 |
| NAGK       | 2.52E-10 | -0.278141528 | 0.334 | 0.527 | 5.49E-06 |
| PTPRC      | 2.57E-10 | -0.257250539 | 0.798 | 0.877 | 5.60E-06 |
| ZCCHC6     | 2.57E-10 | -0.347800787 | 0.393 | 0.566 | 5.61E-06 |
| MAP1LC3B   | 2.61E-10 | 0.301963876  | 0.739 | 0.621 | 5.69E-06 |
| SPAG9      | 2.64E-10 | 0.338250333  | 0.435 | 0.275 | 5.77E-06 |
| RUNX1      | 2.68E-10 | 0.344317758  | 0.485 | 0.324 | 5.85E-06 |
| ATP5F1     | 3.13E-10 | -0.266541251 | 0.546 | 0.719 | 6.82E-06 |
| SQSTM1     | 3.41E-10 | 0.327666219  | 0.826 | 0.773 | 7.43E-06 |
| RNF145     | 3.64E-10 | 0.288563056  | 0.422 | 0.252 | 7.93E-06 |
| IL1R2      | 3.70E-10 | 0.417373732  | 0.363 | 0.203 | 8.06E-06 |
| JKAMP      | 3.73E-10 | -0.264277071 | 0.172 | 0.346 | 8.13E-06 |
| RYBP       | 4.16E-10 | 0.362509083  | 0.324 | 0.164 | 9.07E-06 |
| CRIP1      | 4.32E-10 | 0.49892318   | 0.525 | 0.371 | 9.42E-06 |
| FKBP1A     | 4.68E-10 | -0.298715723 | 0.769 | 0.842 | 1.02E-05 |
| AC058791.1 | 5.28E-10 | 0.250709765  | 0.174 | 0.055 | 1.15E-05 |
| BCAS2      | 5.68E-10 | 0.435558601  | 0.382 | 0.23  | 1.24E-05 |
| ID1        | 6.35E-10 | 0.360264823  | 0.433 | 0.26  | 1.38E-05 |
| IER2       | 8.27E-10 | -0.380238589 | 0.836 | 0.855 | 1.80E-05 |
| NDFIP1     | 8.32E-10 | -0.269533272 | 0.616 | 0.766 | 1.81E-05 |
| SH3BP5     | 9.39E-10 | 0.326089436  | 0.542 | 0.393 | 2.05E-05 |
| GBP1       | 9.89E-10 | 0.26625837   | 0.269 | 0.125 | 2.16E-05 |
| TUBA1A     | 1.06E-09 | 0.392372953  | 0.422 | 0.26  | 2.30E-05 |
| TIPARP     | 1.09E-09 | 0.325394148  | 0.345 | 0.186 | 2.37E-05 |
| PLCB2      | 1.13E-09 | -0.26079382  | 0.162 | 0.33  | 2.47E-05 |
| NUDT16     | 1.16E-09 | -0.285629322 | 0.46  | 0.631 | 2.53E-05 |
| PRELID1    | 1.17E-09 | 0.29827048   | 0.748 | 0.637 | 2.56E-05 |
| ITGB2      | 1.33E-09 | -0.251147906 | 0.765 | 0.854 | 2.90E-05 |
| COTL1      | 1.38E-09 | -0.272271976 | 0.855 | 0.943 | 3.00E-05 |
| RAB1A      | 1.41E-09 | 0.318779241  | 0.576 | 0.459 | 3.08E-05 |
| NOP58      | 1.51E-09 | 0.32326767   | 0.338 | 0.188 | 3.29E-05 |
| ABCA1      | 1.51E-09 | 0.269108323  | 0.769 | 0.646 | 3.29E-05 |
| FAM102B    | 1.59E-09 | 0.303395258  | 0.273 | 0.129 | 3.47E-05 |
| SESTD1     | 1.60E-09 | 0.322463499  | 0.317 | 0.172 | 3.48E-05 |
| NDUFB2     | 1.62E-09 | -0.25812355  | 0.639 | 0.746 | 3.53E-05 |
| EMD        | 1.66E-09 | 0.356764645  | 0.464 | 0.318 | 3.61E-05 |
| RGL1       | 1.85E-09 | -0.342481871 | 0.342 | 0.5   | 4.03E-05 |
| CCL20      | 1.93E-09 | 0.95660427   | 0.124 | 0.025 | 4.21E-05 |
| IVNS1ABP   | 1.99E-09 | 0.359703955  | 0.626 | 0.52  | 4.34E-05 |
| NPL        | 2.10E-09 | -0.361186133 | 0.487 | 0.627 | 4.59E-05 |
| EIF4A1     | 2.14E-09 | 0.271312774  | 0.742 | 0.635 | 4.66E-05 |
| NOTCH1     | 2.17E-09 | 0.255021148  | 0.17  | 0.055 | 4.72E-05 |
| HSD17B7    | 2.25E-09 | 0.293562434  | 0.246 | 0.111 | 4.92E-05 |
| TICAM1     | 2.26E-09 | 0.256944823  | 0.244 | 0.105 | 4.92E-05 |
| RRAGC      | 2.26E-09 | 0.284330159  | 0.313 | 0.164 | 4.93E-05 |
| UBB        | 2.35E-09 | 0.405216711  | 0.868 | 0.834 | 5.13E-05 |
| AP2S1      | 2.68E-09 | -0.281793615 | 0.695 | 0.809 | 5.84E-05 |
| BACH1      | 2.74E-09 | 0.303795463  | 0.489 | 0.322 | 5.98E-05 |
| SRP9       | 2.84E-09 | -0.296515617 | 0.34  | 0.506 | 6.20E-05 |
| STK17B     | 3.18E-09 | -0.257381359 | 0.357 | 0.549 | 6.93E-05 |
| WSB1       | 3.25E-09 | -0.276706809 | 0.832 | 0.881 | 7.10E-05 |
| LSM7       | 3.59E-09 | -0.284159619 | 0.342 | 0.51  | 7.84E-05 |
| ATF4       | 4.06E-09 | 0.291590039  | 0.599 | 0.459 | 8.86E-05 |
| CAP1       | 4.15E-09 | -0.256814042 | 0.683 | 0.781 | 9.05E-05 |
| NDEL1      | 4.30E-09 | 0.25903949   | 0.225 | 0.092 | 9.37E-05 |
| N4BP2L2    | 4.56E-09 | -0.260385718 | 0.357 | 0.545 | 9.95E-05 |
| MT1M       | 4.57E-09 | 0.84422676   | 0.143 | 0.039 | 9.97E-05 |
| ATP1B1     | 4.58E-09 | -0.343284082 | 0.357 | 0.514 | 1.00E-04 |

|                |          |              |       |       |             |
|----------------|----------|--------------|-------|-------|-------------|
| G Fra2         | 4.62E-09 | -0.29504071  | 0.235 | 0.396 | 0.000100793 |
| MAT2A          | 4.62E-09 | 0.359452545  | 0.634 | 0.5   | 0.000100819 |
| UBE2B          | 4.86E-09 | 0.330588306  | 0.708 | 0.613 | 0.000105984 |
| VSIG4          | 4.87E-09 | -0.274553527 | 0.761 | 0.859 | 0.000106272 |
| TYMP           | 4.92E-09 | 0.345414442  | 0.67  | 0.566 | 0.000107264 |
| NRP1           | 4.98E-09 | -0.280357348 | 0.275 | 0.455 | 0.000108594 |
| NABP1          | 4.99E-09 | 0.313981948  | 0.708 | 0.607 | 0.00010888  |
| SGK1           | 5.02E-09 | 0.347322595  | 0.794 | 0.686 | 0.000109536 |
| ZYX            | 5.08E-09 | -0.265208776 | 0.693 | 0.787 | 0.000110856 |
| GABARAPL1      | 5.44E-09 | 0.300678558  | 0.414 | 0.264 | 0.000118626 |
| APPL1          | 5.49E-09 | -0.271354632 | 0.261 | 0.424 | 0.000119645 |
| CD33           | 5.75E-09 | -0.25701887  | 0.338 | 0.508 | 0.000125364 |
| PSMA4          | 5.99E-09 | -0.283305338 | 0.315 | 0.498 | 0.000130595 |
| PTGER2         | 6.23E-09 | 0.299189475  | 0.296 | 0.154 | 0.000135893 |
| TMC8           | 7.30E-09 | -0.254606381 | 0.143 | 0.291 | 0.000159119 |
| ALB            | 7.96E-09 | 0.352036524  | 0.42  | 0.266 | 0.000173609 |
| HLX            | 8.03E-09 | 0.274858197  | 0.242 | 0.111 | 0.000175091 |
| CNPY3          | 8.41E-09 | -0.254376212 | 0.605 | 0.746 | 0.0001835   |
| SLC9A8         | 9.02E-09 | 0.280470061  | 0.2   | 0.08  | 0.000196762 |
| GPR183         | 9.50E-09 | 0.271205399  | 0.544 | 0.369 | 0.000207076 |
| BRK1           | 1.05E-08 | -0.254506703 | 0.544 | 0.713 | 0.000229141 |
| CDC37          | 1.24E-08 | 0.372989752  | 0.63  | 0.529 | 0.000270598 |
| DDX3Y          | 1.31E-08 | 0.326240973  | 0.502 | 0.357 | 0.000285465 |
| VIMP           | 1.32E-08 | 0.336142498  | 0.534 | 0.406 | 0.0002874   |
| S100A4         | 1.33E-08 | -0.380320082 | 0.733 | 0.801 | 0.000289629 |
| CYBB           | 1.67E-08 | -0.266988522 | 0.706 | 0.818 | 0.000363499 |
| HMGB1          | 1.74E-08 | -0.250962193 | 0.821 | 0.885 | 0.000380009 |
| PLEKHG2        | 1.80E-08 | 0.2505749    | 0.21  | 0.086 | 0.000391524 |
| RP11-1080G15.1 | 1.88E-08 | 0.286258492  | 0.202 | 0.082 | 0.000411075 |
| CECR1          | 1.90E-08 | -0.260009305 | 0.744 | 0.824 | 0.00041327  |
| NR1H3          | 2.02E-08 | -0.309206366 | 0.37  | 0.523 | 0.000439555 |
| RPL36A         | 2.10E-08 | 0.250484815  | 0.914 | 0.869 | 0.000458989 |
| PRDX1          | 2.58E-08 | -0.257162573 | 0.723 | 0.814 | 0.000561587 |
| SLC5A3         | 2.59E-08 | 0.291333122  | 0.231 | 0.104 | 0.000565112 |
| UBE2J1         | 2.75E-08 | 0.283065345  | 0.622 | 0.508 | 0.000599172 |
| SDC3           | 2.80E-08 | -0.316203408 | 0.328 | 0.484 | 0.000609968 |
| IL6            | 2.88E-08 | 0.284455963  | 0.113 | 0.025 | 0.000627448 |
| AHNAK          | 3.02E-08 | -0.312270235 | 0.553 | 0.678 | 0.000659246 |
| NDUFA4         | 3.06E-08 | -0.253714023 | 0.71  | 0.818 | 0.000668248 |
| CD300E         | 3.16E-08 | 0.27658343   | 0.185 | 0.072 | 0.000689785 |
| MNDA           | 3.40E-08 | -0.307587626 | 0.431 | 0.572 | 0.000740965 |
| CYCS           | 3.43E-08 | 0.487954866  | 0.626 | 0.543 | 0.000747449 |
| CLTA           | 3.52E-08 | -0.259175212 | 0.674 | 0.783 | 0.000768351 |
| SAR1A          | 3.59E-08 | 0.281943808  | 0.328 | 0.193 | 0.000783151 |
| NR4A1          | 3.97E-08 | 0.297678513  | 0.737 | 0.564 | 0.000864857 |
| TSPAN4         | 4.01E-08 | -0.266661697 | 0.571 | 0.697 | 0.000874    |
| TNFRSF1B       | 4.04E-08 | 0.317828406  | 0.708 | 0.623 | 0.000881521 |
| MORF4L2        | 4.32E-08 | 0.265615836  | 0.454 | 0.299 | 0.000941412 |
| GADD45A        | 4.39E-08 | 0.290868291  | 0.216 | 0.096 | 0.00095689  |
| TPM4           | 4.51E-08 | 0.300750409  | 0.525 | 0.406 | 0.000982978 |
| IRF7           | 4.57E-08 | 0.300459379  | 0.42  | 0.287 | 0.000996539 |
| SMIM3          | 4.60E-08 | 0.273462605  | 0.296 | 0.168 | 0.001003276 |
| ARL4A          | 4.73E-08 | 0.273922545  | 0.712 | 0.615 | 0.001031612 |
| C19orf70       | 4.96E-08 | -0.251547987 | 0.372 | 0.555 | 0.00108258  |
| FAM20A         | 5.31E-08 | 0.277750596  | 0.424 | 0.287 | 0.001158733 |
| MRC1           | 5.75E-08 | -0.327093666 | 0.616 | 0.738 | 0.001254272 |
| ANKRD37        | 5.93E-08 | 0.270997348  | 0.261 | 0.131 | 0.001294079 |
| RANGAP1        | 6.68E-08 | 0.252296181  | 0.197 | 0.084 | 0.001456225 |
| CITED2         | 7.12E-08 | -0.389181074 | 0.462 | 0.605 | 0.001552321 |
| BHLHE40        | 7.62E-08 | 0.268551845  | 0.613 | 0.467 | 0.001662035 |
| SEPHS2         | 8.64E-08 | 0.332931707  | 0.368 | 0.238 | 0.001883708 |
| GYPC           | 9.51E-08 | 0.253288049  | 0.63  | 0.498 | 0.002074536 |
| MT-ND6         | 9.73E-08 | -0.282346975 | 0.664 | 0.766 | 0.002121194 |
| SOD1           | 1.13E-07 | 0.33895134   | 0.662 | 0.574 | 0.002472101 |
| HCAR3          | 1.29E-07 | 0.333075146  | 0.168 | 0.064 | 0.002805214 |
| NAAA           | 1.29E-07 | -0.268567531 | 0.418 | 0.561 | 0.002809984 |
| SLC16A6        | 1.39E-07 | 0.307408397  | 0.204 | 0.094 | 0.003041043 |
| CHD2           | 1.42E-07 | 0.255552933  | 0.536 | 0.393 | 0.003094887 |
| EVI2B          | 1.54E-07 | -0.256817133 | 0.683 | 0.77  | 0.003357589 |
| TSPYL2         | 1.67E-07 | 0.276498887  | 0.229 | 0.107 | 0.003631907 |



|          |          |              |       |       |             |
|----------|----------|--------------|-------|-------|-------------|
| IL6ST    | 1.78E-07 | 0.270566888  | 0.416 | 0.277 | 0.003888615 |
| AP1S2    | 2.11E-07 | -0.252124248 | 0.716 | 0.811 | 0.004603395 |
| ATF7IP2  | 2.88E-07 | 0.450010466  | 0.204 | 0.096 | 0.006283519 |
| SYK      | 2.90E-07 | -0.260141863 | 0.239 | 0.391 | 0.00633488  |
| CHORDC1  | 3.07E-07 | 0.312759322  | 0.368 | 0.254 | 0.006691261 |
| MT1X     | 4.30E-07 | 0.854174673  | 0.513 | 0.373 | 0.009370464 |
| CYTIP    | 4.32E-07 | -0.263845435 | 0.332 | 0.477 | 0.00942337  |
| TANK     | 4.33E-07 | 0.276561062  | 0.473 | 0.336 | 0.009439566 |
| IFITM3   | 4.43E-07 | 0.263331663  | 0.87  | 0.838 | 0.009651376 |
| EGR1     | 4.49E-07 | -0.463528214 | 0.342 | 0.484 | 0.009782741 |
| GLA      | 5.10E-07 | 0.554186924  | 0.473 | 0.365 | 0.011113655 |
| S100A10  | 5.17E-07 | 0.388639782  | 0.803 | 0.719 | 0.011275139 |
| FNIP2    | 6.04E-07 | 0.323270437  | 0.473 | 0.377 | 0.013172841 |
| STK38L   | 6.51E-07 | 0.255834992  | 0.305 | 0.184 | 0.014194298 |
| VPS13C   | 6.85E-07 | -0.252309774 | 0.342 | 0.484 | 0.014939248 |
| CFLAR    | 8.12E-07 | 0.279267387  | 0.634 | 0.533 | 0.017714922 |
| GUK1     | 8.13E-07 | 0.273697596  | 0.689 | 0.635 | 0.017725149 |
| PRNP     | 8.34E-07 | 0.317690414  | 0.723 | 0.67  | 0.018190386 |
| ZFAND5   | 8.70E-07 | 0.328540194  | 0.811 | 0.752 | 0.018971234 |
| IRAK3    | 8.82E-07 | 0.298336678  | 0.569 | 0.465 | 0.019225777 |
| NUDT3    | 9.50E-07 | -0.251392753 | 0.166 | 0.293 | 0.020719183 |
| CASP4    | 1.02E-06 | 0.27315351   | 0.534 | 0.422 | 0.022167374 |
| EML4     | 1.02E-06 | 0.329007034  | 0.374 | 0.256 | 0.022326475 |
| TNFSF13B | 1.14E-06 | 0.366109254  | 0.485 | 0.387 | 0.024853693 |
| KYNU     | 1.25E-06 | 0.267842592  | 0.481 | 0.363 | 0.027159563 |
| GNA15    | 1.42E-06 | 0.263834839  | 0.321 | 0.205 | 0.030871481 |
| C11orf31 | 1.51E-06 | -0.256186431 | 0.424 | 0.551 | 0.032950659 |

List of differentially expressed genes of VCAN Tmo in reperfusion stage (PR versus EP)

| gene     | p val    | avg logFC    | pct.1 | pct.2 | p val adj |
|----------|----------|--------------|-------|-------|-----------|
| HLA-DRB5 | 4.50E-61 | -1.267756909 | 0.401 | 0.938 | 9.82E-57  |
| THBS1    | 2.03E-56 | 1.290499442  | 0.962 | 0.765 | 4.42E-52  |
| NAMPT    | 1.29E-50 | 0.884883095  | 0.993 | 0.893 | 2.81E-46  |
| ACSL1    | 8.83E-42 | 0.909493474  | 0.89  | 0.581 | 1.93E-37  |
| SRGN     | 3.26E-39 | 0.496140506  | 1     | 1     | 7.10E-35  |
| H3F3B    | 6.98E-39 | 0.565344955  | 0.995 | 0.985 | 1.52E-34  |
| ACTB     | 2.83E-38 | 0.375341711  | 1     | 1     | 6.16E-34  |
| VCAN     | 4.01E-37 | 0.73001184   | 0.983 | 0.945 | 8.74E-33  |
| FPR1     | 4.39E-37 | 0.814800651  | 0.9   | 0.695 | 9.57E-33  |
| UPP1     | 2.13E-36 | 0.835369896  | 0.847 | 0.496 | 4.64E-32  |
| CST3     | 1.22E-35 | -0.504831227 | 0.998 | 1     | 2.65E-31  |
| ASPH     | 7.18E-35 | 0.934731608  | 0.649 | 0.224 | 1.57E-30  |
| HLA-DQB1 | 8.51E-34 | -0.80214729  | 0.332 | 0.783 | 1.86E-29  |
| S100A8   | 1.03E-33 | 0.793008849  | 0.998 | 0.993 | 2.24E-29  |
| FCER1G   | 2.15E-33 | 0.524695182  | 1     | 0.993 | 4.70E-29  |
| DEFA3    | 3.76E-33 | -0.658645176 | 0.017 | 0.349 | 8.20E-29  |
| AQP9     | 3.98E-33 | 0.860790581  | 0.702 | 0.268 | 8.67E-29  |
| S100A9   | 6.26E-33 | 0.86407844   | 0.993 | 0.978 | 1.37E-28  |
| TPM4     | 1.61E-32 | 0.755438163  | 0.864 | 0.625 | 3.51E-28  |
| TMSB4X   | 2.16E-32 | -0.369724126 | 1     | 0.993 | 4.70E-28  |
| TRMT6    | 3.10E-32 | 0.957515433  | 0.558 | 0.143 | 6.77E-28  |
| LITAF    | 4.67E-32 | 0.859978981  | 0.842 | 0.57  | 1.02E-27  |
| EEF1A1   | 1.16E-31 | -0.321467062 | 0.998 | 0.996 | 2.53E-27  |
| S100A12  | 1.50E-31 | 0.985267306  | 0.938 | 0.831 | 3.27E-27  |
| GIMAP1   | 8.91E-31 | -0.618966708 | 0.076 | 0.452 | 1.94E-26  |
| FPR2     | 3.22E-30 | 0.908560235  | 0.582 | 0.169 | 7.03E-26  |
| CTSL     | 4.75E-29 | 1.63787354   | 0.642 | 0.301 | 1.04E-24  |
| EVI2B    | 1.90E-28 | -0.683801141 | 0.556 | 0.86  | 4.14E-24  |
| TIMP1    | 2.47E-28 | 0.90586156   | 0.979 | 0.952 | 5.38E-24  |
| FGL2     | 4.76E-28 | -0.62217022  | 0.425 | 0.846 | 1.04E-23  |
| PABPC1   | 7.41E-27 | -0.429926052 | 0.931 | 0.982 | 1.62E-22  |
| RPL10    | 2.61E-26 | -0.265092433 | 1     | 0.993 | 5.68E-22  |
| GIMAP2   | 3.62E-26 | -0.52771133  | 0.053 | 0.371 | 7.90E-22  |
| METTL7A  | 1.13E-25 | -0.631720814 | 0.153 | 0.529 | 2.46E-21  |
| RPL5     | 1.47E-25 | -0.3799378   | 0.964 | 0.978 | 3.19E-21  |
| SAT1     | 5.95E-25 | 0.423159569  | 0.998 | 1     | 1.30E-20  |
| CD63     | 5.96E-25 | 0.610076221  | 0.916 | 0.779 | 1.30E-20  |
| MCEMP1   | 6.37E-25 | 0.821649823  | 0.661 | 0.316 | 1.39E-20  |

|          |          |              |       |       |          |
|----------|----------|--------------|-------|-------|----------|
| PLSCR1   | 1.00E-24 | 0.680921229  | 0.754 | 0.478 | 2.18E-20 |
| IL1R2    | 3.76E-24 | 1.184803314  | 0.599 | 0.276 | 8.21E-20 |
| HSPA1B   | 8.64E-24 | -0.81464928  | 0.229 | 0.566 | 1.88E-19 |
| TXNIP    | 1.86E-23 | -0.773666757 | 0.453 | 0.783 | 4.06E-19 |
| SLC39A8  | 3.67E-23 | 0.955811609  | 0.437 | 0.099 | 8.00E-19 |
| AREG     | 6.28E-23 | 0.922225552  | 0.871 | 0.629 | 1.37E-18 |
| BLVRB    | 8.11E-23 | -0.547513872 | 0.63  | 0.871 | 1.77E-18 |
| RNASE6   | 1.13E-22 | -0.594078698 | 0.368 | 0.717 | 2.47E-18 |
| RPS14    | 1.25E-22 | -0.253030897 | 0.993 | 0.996 | 2.73E-18 |
| CSF1R    | 2.66E-22 | -0.536185201 | 0.126 | 0.46  | 5.79E-18 |
| HSPA8    | 3.93E-22 | -0.462567032 | 0.589 | 0.868 | 8.58E-18 |
| SELL     | 4.04E-22 | 0.834999381  | 0.69  | 0.404 | 8.80E-18 |
| SLC2A3   | 6.60E-22 | 0.716590442  | 0.833 | 0.625 | 1.44E-17 |
| IFITM2   | 9.42E-22 | 0.646052758  | 0.936 | 0.926 | 2.05E-17 |
| NACA     | 1.19E-21 | -0.308374134 | 0.993 | 0.982 | 2.60E-17 |
| VAMP8    | 1.21E-21 | -0.523123606 | 0.613 | 0.842 | 2.63E-17 |
| S100A4   | 1.69E-21 | -0.299082087 | 1     | 0.993 | 3.69E-17 |
| HBB      | 2.14E-21 | -0.560973265 | 0.086 | 0.39  | 4.68E-17 |
| SULT1A1  | 2.15E-21 | -0.556921492 | 0.208 | 0.555 | 4.70E-17 |
| VSIG4    | 2.42E-21 | -0.683785558 | 0.1   | 0.401 | 5.28E-17 |
| NUP214   | 3.10E-21 | -0.542728034 | 0.265 | 0.621 | 6.75E-17 |
| BTG1     | 3.51E-21 | -0.510322258 | 0.842 | 0.967 | 7.66E-17 |
| PIM1     | 9.02E-21 | 0.656789262  | 0.396 | 0.081 | 1.97E-16 |
| RHOB     | 1.00E-20 | -0.636775721 | 0.649 | 0.857 | 2.18E-16 |
| AGFG1    | 1.33E-20 | 0.714316159  | 0.663 | 0.39  | 2.90E-16 |
| RPS29    | 1.38E-20 | 0.391741942  | 0.952 | 0.956 | 3.01E-16 |
| CXCR4    | 2.02E-20 | -0.633296138 | 0.432 | 0.757 | 4.40E-16 |
| GIMAP7   | 2.87E-20 | -0.461253325 | 0.048 | 0.301 | 6.26E-16 |
| LIMD2    | 3.80E-20 | -0.566724903 | 0.372 | 0.695 | 8.30E-16 |
| GPX1     | 4.43E-20 | 0.424928459  | 0.957 | 0.919 | 9.65E-16 |
| NFKBIZ   | 4.56E-20 | -0.605705677 | 0.42  | 0.746 | 9.94E-16 |
| GNB2L1   | 6.73E-20 | -0.314158186 | 0.974 | 0.982 | 1.47E-15 |
| SERPINB9 | 7.78E-20 | 0.606272752  | 0.589 | 0.261 | 1.70E-15 |
| RPL29    | 9.33E-20 | -0.250854779 | 0.988 | 0.985 | 2.03E-15 |
| SLC25A6  | 1.30E-19 | -0.375119731 | 0.881 | 0.941 | 2.83E-15 |
| SERPINB1 | 1.39E-19 | 0.529784594  | 0.926 | 0.86  | 3.02E-15 |
| MAP3K8   | 1.49E-19 | 0.697977486  | 0.733 | 0.496 | 3.24E-15 |
| SEC11A   | 1.62E-19 | -0.427516539 | 0.644 | 0.904 | 3.52E-15 |
| ETS2     | 2.78E-19 | 0.610096771  | 0.759 | 0.562 | 6.07E-15 |
| SLC25A37 | 3.37E-19 | 0.608837657  | 0.609 | 0.305 | 7.36E-15 |
| RPL7A    | 4.83E-19 | -0.25720786  | 0.986 | 0.989 | 1.05E-14 |
| FCGR3A   | 5.02E-19 | -0.670257867 | 0.107 | 0.386 | 1.09E-14 |
| MYL6     | 5.21E-19 | 0.351783915  | 0.99  | 0.978 | 1.14E-14 |
| PAG1     | 7.36E-19 | 0.672932235  | 0.601 | 0.301 | 1.61E-14 |
| PNP      | 7.68E-19 | 0.69080632   | 0.566 | 0.283 | 1.67E-14 |
| GCA      | 7.77E-19 | 0.572246044  | 0.869 | 0.842 | 1.70E-14 |
| PIM3     | 9.27E-19 | 0.63839631   | 0.535 | 0.232 | 2.02E-14 |
| MIS18BP1 | 9.31E-19 | -0.428469512 | 0.084 | 0.357 | 2.03E-14 |
| RUNX1    | 1.19E-18 | 0.599430001  | 0.578 | 0.276 | 2.60E-14 |
| PLD3     | 1.38E-18 | -0.555974013 | 0.301 | 0.607 | 3.00E-14 |
| TPM3     | 1.61E-18 | 0.406580238  | 0.921 | 0.882 | 3.51E-14 |
| GIMAP4   | 3.93E-18 | -0.484887474 | 0.191 | 0.511 | 8.56E-14 |
| CFL1     | 6.37E-18 | 0.295198715  | 0.99  | 0.985 | 1.39E-13 |
| HIF1A    | 8.25E-18 | 0.615427326  | 0.723 | 0.529 | 1.80E-13 |
| RCSD1    | 1.22E-17 | -0.450483714 | 0.136 | 0.43  | 2.67E-13 |
| RPL18    | 1.25E-17 | -0.250282415 | 0.995 | 0.989 | 2.72E-13 |
| CRTAP    | 1.72E-17 | -0.509917803 | 0.482 | 0.761 | 3.75E-13 |
| DUSP1    | 1.76E-17 | -0.394039184 | 0.969 | 0.985 | 3.83E-13 |
| MARCKS   | 1.87E-17 | 0.705637764  | 0.632 | 0.353 | 4.09E-13 |
| SAMSN1   | 2.06E-17 | 0.518855191  | 0.878 | 0.765 | 4.49E-13 |
| CLIC1    | 2.12E-17 | 0.355597022  | 0.974 | 0.938 | 4.62E-13 |
| JUN      | 2.62E-17 | -0.762555758 | 0.434 | 0.688 | 5.72E-13 |
| IFI30    | 4.37E-17 | 0.517702711  | 0.854 | 0.768 | 9.53E-13 |
| IL1RAP   | 4.88E-17 | 0.648850832  | 0.372 | 0.096 | 1.06E-12 |
| RPL14    | 5.95E-17 | -0.262279899 | 0.971 | 0.989 | 1.30E-12 |
| FAM65B   | 6.27E-17 | 0.622156919  | 0.685 | 0.493 | 1.37E-12 |
| CD93     | 6.71E-17 | 0.580643735  | 0.64  | 0.364 | 1.46E-12 |
| LRG1     | 7.25E-17 | 0.618787955  | 0.315 | 0.055 | 1.58E-12 |
| C20orf27 | 1.14E-16 | -0.411703409 | 0.181 | 0.489 | 2.49E-12 |
| TKT      | 1.19E-16 | -0.454140747 | 0.823 | 0.941 | 2.60E-12 |

|          |          |              |       |       |          |
|----------|----------|--------------|-------|-------|----------|
| ADAMTS2  | 1.21E-16 | -0.435549922 | 0.103 | 0.368 | 2.64E-12 |
| B4GALT5  | 1.26E-16 | 0.588804352  | 0.372 | 0.103 | 2.74E-12 |
| FCGR1A   | 2.11E-16 | 0.661229315  | 0.666 | 0.449 | 4.60E-12 |
| TNFSF10  | 2.80E-16 | -0.444161657 | 0.045 | 0.265 | 6.12E-12 |
| RGCC     | 3.39E-16 | 0.929872992  | 0.411 | 0.129 | 7.39E-12 |
| RASSF4   | 4.43E-16 | -0.44084031  | 0.141 | 0.419 | 9.65E-12 |
| PYCARD   | 4.44E-16 | -0.438706309 | 0.659 | 0.871 | 9.68E-12 |
| CD300E   | 4.78E-16 | 0.686412617  | 0.628 | 0.404 | 1.04E-11 |
| SLC25A5  | 4.84E-16 | -0.414606599 | 0.656 | 0.875 | 1.06E-11 |
| MCTP2    | 5.50E-16 | 0.524464675  | 0.308 | 0.059 | 1.20E-11 |
| CKAP4    | 6.61E-16 | 0.604374798  | 0.492 | 0.221 | 1.44E-11 |
| IFITM3   | 7.38E-16 | 0.711393944  | 0.89  | 0.875 | 1.61E-11 |
| POMP     | 8.48E-16 | 0.463309099  | 0.845 | 0.728 | 1.85E-11 |
| ANXA1    | 8.69E-16 | 0.417595896  | 0.936 | 0.893 | 1.89E-11 |
| MS4A6A   | 2.17E-15 | -0.471518886 | 0.745 | 0.89  | 4.73E-11 |
| RAB31    | 2.28E-15 | 0.549933478  | 0.783 | 0.654 | 4.98E-11 |
| TYMP     | 3.50E-15 | 0.496500552  | 0.854 | 0.739 | 7.63E-11 |
| BIN2     | 3.84E-15 | -0.387325603 | 0.165 | 0.449 | 8.37E-11 |
| CD82     | 4.58E-15 | 0.493605508  | 0.341 | 0.088 | 9.98E-11 |
| CD74     | 7.22E-15 | -0.302088795 | 0.988 | 0.985 | 1.57E-10 |
| CXCL8    | 8.86E-15 | -0.791915431 | 0.537 | 0.787 | 1.93E-10 |
| FLT3     | 9.07E-15 | -0.338354956 | 0.079 | 0.312 | 1.98E-10 |
| PSTPIP1  | 9.20E-15 | -0.396987058 | 0.184 | 0.463 | 2.01E-10 |
| RPL6     | 9.39E-15 | -0.255065834 | 0.986 | 0.993 | 2.05E-10 |
| GDI2     | 9.93E-15 | -0.429639023 | 0.566 | 0.82  | 2.17E-10 |
| GRINA    | 1.20E-14 | 0.464830128  | 0.828 | 0.706 | 2.62E-10 |
| HVCN1    | 1.39E-14 | -0.358501974 | 0.043 | 0.239 | 3.04E-10 |
| P2RY13   | 1.41E-14 | -0.351821636 | 0.036 | 0.224 | 3.07E-10 |
| TOP1     | 2.20E-14 | 0.587674134  | 0.592 | 0.375 | 4.79E-10 |
| PAK1     | 2.73E-14 | -0.396303042 | 0.107 | 0.353 | 5.94E-10 |
| EIF4EBP1 | 3.47E-14 | -0.383933099 | 0.186 | 0.471 | 7.57E-10 |
| LIPA     | 3.49E-14 | -0.559967429 | 0.334 | 0.625 | 7.61E-10 |
| CLNS1A   | 3.65E-14 | -0.360402793 | 0.141 | 0.404 | 7.96E-10 |
| SERPINB2 | 4.13E-14 | 0.772853251  | 0.37  | 0.107 | 9.01E-10 |
| RPL24    | 4.15E-14 | -0.263458257 | 0.955 | 0.982 | 9.05E-10 |
| MT-CYB   | 4.19E-14 | 0.289895161  | 1     | 1     | 9.14E-10 |
| SEMA6B   | 4.72E-14 | 0.47843202   | 0.234 | 0.026 | 1.03E-09 |
| DSE      | 5.36E-14 | 0.561321406  | 0.523 | 0.29  | 1.17E-09 |
| RPLP0    | 5.47E-14 | -0.27931726  | 0.959 | 0.963 | 1.19E-09 |
| POU2F2   | 6.10E-14 | -0.367081615 | 0.236 | 0.533 | 1.33E-09 |
| ABI3     | 6.78E-14 | -0.355602839 | 0.076 | 0.29  | 1.48E-09 |
| HNMT     | 7.45E-14 | -0.464190792 | 0.239 | 0.522 | 1.62E-09 |
| ATP1A1   | 8.67E-14 | 0.516120809  | 0.609 | 0.393 | 1.89E-09 |
| AP1S2    | 1.17E-13 | -0.390955365 | 0.706 | 0.846 | 2.54E-09 |
| ATP5G2   | 1.29E-13 | -0.260082672 | 0.94  | 0.982 | 2.82E-09 |
| SH3BP1   | 1.43E-13 | -0.346307034 | 0.1   | 0.335 | 3.11E-09 |
| NR4A2    | 1.87E-13 | -0.498282498 | 0.618 | 0.835 | 4.08E-09 |
| KCNE3    | 2.04E-13 | -0.366843777 | 0.107 | 0.338 | 4.45E-09 |
| CYBRD1   | 2.13E-13 | -0.282411906 | 0.026 | 0.191 | 4.65E-09 |
| GNG10    | 2.42E-13 | 0.540796102  | 0.621 | 0.43  | 5.27E-09 |
| RPS5     | 2.83E-13 | -0.275330847 | 0.933 | 0.949 | 6.18E-09 |
| BCL2A1   | 3.52E-13 | 0.302411432  | 0.926 | 0.787 | 7.67E-09 |
| CALHM2   | 3.55E-13 | -0.336508645 | 0.045 | 0.228 | 7.75E-09 |
| NRG7     | 4.23E-13 | 0.719037437  | 0.418 | 0.191 | 9.23E-09 |
| CIR1     | 4.37E-13 | -0.325073463 | 0.067 | 0.272 | 9.53E-09 |
| HLA-DPA1 | 4.40E-13 | -0.469427247 | 0.575 | 0.801 | 9.59E-09 |
| NR4A1    | 5.48E-13 | -0.638904651 | 0.406 | 0.625 | 1.20E-08 |
| DNASE2   | 6.34E-13 | -0.315376701 | 0.06  | 0.254 | 1.38E-08 |
| HLA-DMB  | 6.53E-13 | -0.382599265 | 0.167 | 0.419 | 1.42E-08 |
| SULT1B1  | 7.88E-13 | -0.370423469 | 0.098 | 0.324 | 1.72E-08 |
| EEF2     | 7.95E-13 | -0.372304154 | 0.847 | 0.919 | 1.73E-08 |
| GK       | 8.05E-13 | 0.545407066  | 0.68  | 0.489 | 1.75E-08 |
| AMPH     | 8.84E-13 | -0.271659938 | 0.031 | 0.199 | 1.93E-08 |
| MEF2C    | 8.88E-13 | -0.468191931 | 0.208 | 0.474 | 1.94E-08 |
| ZFAS1    | 9.48E-13 | -0.361574514 | 0.764 | 0.915 | 2.07E-08 |
| GLMP     | 9.59E-13 | -0.318680901 | 0.057 | 0.246 | 2.09E-08 |
| CNPY3    | 9.63E-13 | -0.366777043 | 0.496 | 0.776 | 2.10E-08 |
| OGFRL1   | 1.12E-12 | -0.326307438 | 0.091 | 0.309 | 2.43E-08 |
| CNIH4    | 1.16E-12 | 0.59774683   | 0.592 | 0.43  | 2.53E-08 |
| STXBP2   | 1.28E-12 | 0.568089291  | 0.862 | 0.798 | 2.80E-08 |

|            |          |              |       |       |          |
|------------|----------|--------------|-------|-------|----------|
| LDHB       | 1.33E-12 | -0.414349576 | 0.332 | 0.61  | 2.89E-08 |
| FGD2       | 1.57E-12 | -0.440021511 | 0.148 | 0.386 | 3.43E-08 |
| PFKFB3     | 1.67E-12 | 0.47306474   | 0.461 | 0.217 | 3.63E-08 |
| STX10      | 1.85E-12 | -0.390787858 | 0.232 | 0.504 | 4.03E-08 |
| NR4A3      | 2.10E-12 | -0.480011916 | 0.191 | 0.43  | 4.57E-08 |
| MYL12A     | 2.13E-12 | 0.33841369   | 0.952 | 0.89  | 4.65E-08 |
| PPIF       | 2.24E-12 | 0.573669908  | 0.484 | 0.257 | 4.88E-08 |
| GK5        | 2.30E-12 | 0.44193724   | 0.246 | 0.048 | 5.02E-08 |
| EIF3E      | 2.37E-12 | -0.360875699 | 0.656 | 0.864 | 5.17E-08 |
| MAFB       | 2.91E-12 | 0.511742908  | 0.857 | 0.798 | 6.35E-08 |
| LST1       | 2.96E-12 | -0.342450196 | 0.804 | 0.919 | 6.47E-08 |
| NME3       | 3.47E-12 | -0.347632435 | 0.091 | 0.301 | 7.57E-08 |
| MS4A7      | 3.71E-12 | -0.459521355 | 0.305 | 0.57  | 8.09E-08 |
| INPP5D     | 3.73E-12 | -0.288549154 | 0.06  | 0.25  | 8.13E-08 |
| SDC4       | 4.30E-12 | 0.500120209  | 0.291 | 0.081 | 9.37E-08 |
| MID1IP1    | 4.31E-12 | -0.423421957 | 0.167 | 0.408 | 9.41E-08 |
| IL18       | 5.50E-12 | -0.392531256 | 0.126 | 0.346 | 1.20E-07 |
| RBKS       | 6.05E-12 | -0.518259088 | 0.181 | 0.426 | 1.32E-07 |
| NDE1       | 7.74E-12 | -0.262939122 | 0.053 | 0.232 | 1.69E-07 |
| UBL7       | 7.77E-12 | -0.305009037 | 0.086 | 0.287 | 1.69E-07 |
| CPM        | 7.91E-12 | -0.359559083 | 0.167 | 0.412 | 1.73E-07 |
| RGS2       | 8.58E-12 | -0.418070929 | 0.692 | 0.879 | 1.87E-07 |
| LILRA5     | 9.04E-12 | 0.460382597  | 0.766 | 0.614 | 1.97E-07 |
| CXCL2      | 1.17E-11 | -0.613253174 | 0.511 | 0.721 | 2.56E-07 |
| SLCO4A1    | 1.30E-11 | 0.400512993  | 0.205 | 0.026 | 2.83E-07 |
| RBMS1      | 1.30E-11 | 0.494459711  | 0.606 | 0.419 | 2.84E-07 |
| HLA-DPB1   | 1.62E-11 | -0.509435279 | 0.516 | 0.724 | 3.52E-07 |
| GIMAP8     | 1.67E-11 | -0.281774526 | 0.031 | 0.184 | 3.63E-07 |
| CD1D       | 1.80E-11 | -0.348394841 | 0.129 | 0.349 | 3.93E-07 |
| TMEM69     | 1.99E-11 | -0.294334855 | 0.086 | 0.279 | 4.35E-07 |
| CALML4     | 2.04E-11 | -0.25383756  | 0.041 | 0.202 | 4.45E-07 |
| HLA-A      | 2.24E-11 | -0.284376888 | 0.947 | 0.982 | 4.87E-07 |
| FAM129B    | 2.25E-11 | 0.431083342  | 0.26  | 0.062 | 4.90E-07 |
| LMNB1      | 2.28E-11 | 0.453731378  | 0.248 | 0.059 | 4.98E-07 |
| HEBP1      | 2.39E-11 | -0.315999984 | 0.131 | 0.353 | 5.20E-07 |
| MT1E       | 2.57E-11 | -0.875613952 | 0.091 | 0.276 | 5.60E-07 |
| ZFP36L2    | 2.61E-11 | -0.405374719 | 0.704 | 0.875 | 5.68E-07 |
| PHB2       | 2.88E-11 | -0.344951886 | 0.308 | 0.555 | 6.27E-07 |
| RNF141     | 4.21E-11 | -0.429634244 | 0.193 | 0.419 | 9.18E-07 |
| GIMAP6     | 5.10E-11 | -0.251695171 | 0.05  | 0.217 | 1.11E-06 |
| MCL1       | 5.68E-11 | 0.293799841  | 0.931 | 0.893 | 1.24E-06 |
| AC004556.1 | 7.18E-11 | 0.313721587  | 0.143 | 0     | 1.57E-06 |
| PLAUR      | 7.60E-11 | 0.425756338  | 0.928 | 0.846 | 1.66E-06 |
| ANP32B     | 8.33E-11 | -0.329907427 | 0.425 | 0.68  | 1.82E-06 |
| ANKRD44    | 8.56E-11 | -0.271709263 | 0.112 | 0.32  | 1.87E-06 |
| SDC2       | 8.63E-11 | 0.447001123  | 0.21  | 0.037 | 1.88E-06 |
| CMTM7      | 8.75E-11 | -0.37009401  | 0.289 | 0.555 | 1.91E-06 |
| ATP13A3    | 1.22E-10 | 0.481562719  | 0.425 | 0.213 | 2.66E-06 |
| RBM47      | 1.57E-10 | 0.465656634  | 0.666 | 0.504 | 3.43E-06 |
| ADM        | 1.59E-10 | 0.487430103  | 0.547 | 0.324 | 3.47E-06 |
| TAGAP      | 1.61E-10 | -0.484630993 | 0.236 | 0.46  | 3.51E-06 |
| VAPA       | 1.64E-10 | 0.421573687  | 0.785 | 0.739 | 3.58E-06 |
| SRSF2      | 1.80E-10 | 0.421217711  | 0.704 | 0.607 | 3.92E-06 |
| HP         | 1.97E-10 | 0.420773689  | 0.241 | 0.055 | 4.30E-06 |
| DOK2       | 2.13E-10 | -0.315234019 | 0.368 | 0.64  | 4.64E-06 |
| SSR3       | 2.25E-10 | -0.33784409  | 0.351 | 0.61  | 4.90E-06 |
| CHSY1      | 2.42E-10 | 0.396091036  | 0.289 | 0.096 | 5.28E-06 |
| NFIA       | 2.66E-10 | -0.280918012 | 0.038 | 0.184 | 5.81E-06 |
| DCK        | 2.88E-10 | -0.280651799 | 0.072 | 0.243 | 6.28E-06 |
| EVI2A      | 2.99E-10 | -0.273851157 | 0.16  | 0.39  | 6.53E-06 |
| LYSMD2     | 3.05E-10 | -0.28142095  | 0.105 | 0.305 | 6.64E-06 |
| FLOT1      | 3.14E-10 | 0.482224329  | 0.518 | 0.346 | 6.85E-06 |
| WIPF1      | 3.33E-10 | -0.290965907 | 0.27  | 0.518 | 7.25E-06 |
| HRH2       | 3.36E-10 | 0.450124892  | 0.42  | 0.221 | 7.33E-06 |
| AHNAK      | 3.41E-10 | -0.410281685 | 0.623 | 0.835 | 7.43E-06 |
| ZEB2       | 3.48E-10 | 0.317362704  | 0.897 | 0.912 | 7.59E-06 |
| CCL3L3     | 3.99E-10 | -0.561054738 | 0.193 | 0.419 | 8.69E-06 |
| YWHAZ      | 4.32E-10 | 0.301578135  | 0.878 | 0.857 | 9.43E-06 |
| ZFAND5     | 4.57E-10 | -0.426720767 | 0.718 | 0.849 | 9.98E-06 |
| SUB1       | 4.83E-10 | 0.338952309  | 0.864 | 0.835 | 1.05E-05 |

|             |          |              |       |       |             |
|-------------|----------|--------------|-------|-------|-------------|
| FAM96A      | 5.83E-10 | -0.350034497 | 0.32  | 0.577 | 1.27E-05    |
| YPEL3       | 5.98E-10 | -0.259584456 | 0.064 | 0.232 | 1.30E-05    |
| ADCY7       | 6.42E-10 | -0.309971276 | 0.086 | 0.265 | 1.40E-05    |
| PTPN1       | 6.74E-10 | 0.424576239  | 0.415 | 0.217 | 1.47E-05    |
| SERPINA1    | 6.86E-10 | 0.342375463  | 0.943 | 0.912 | 1.50E-05    |
| SARAF       | 7.31E-10 | -0.283574499 | 0.642 | 0.853 | 1.59E-05    |
| PRELID1     | 7.37E-10 | 0.382805687  | 0.778 | 0.684 | 1.61E-05    |
| SLC7A7      | 7.42E-10 | -0.374318768 | 0.403 | 0.618 | 1.62E-05    |
| BTG2        | 7.48E-10 | -0.361217704 | 0.224 | 0.452 | 1.63E-05    |
| DDX60L      | 7.60E-10 | 0.454018414  | 0.36  | 0.169 | 1.66E-05    |
| ENO1        | 7.86E-10 | 0.326109713  | 0.859 | 0.809 | 1.71E-05    |
| ERP29       | 8.31E-10 | -0.385448308 | 0.501 | 0.735 | 1.81E-05    |
| CHCHD10     | 1.00E-09 | -0.36962908  | 0.308 | 0.54  | 2.18E-05    |
| PRAM1       | 1.00E-09 | -0.282121466 | 0.158 | 0.371 | 2.18E-05    |
| RSL24D1     | 1.01E-09 | -0.274679108 | 0.413 | 0.676 | 2.21E-05    |
| BAZ2B       | 1.07E-09 | -0.286379856 | 0.146 | 0.36  | 2.34E-05    |
| ATF3        | 1.13E-09 | -0.358639995 | 0.315 | 0.559 | 2.47E-05    |
| BTK         | 1.26E-09 | -0.261928852 | 0.095 | 0.279 | 2.75E-05    |
| JARID2      | 1.27E-09 | 0.464171196  | 0.461 | 0.276 | 2.76E-05    |
| SMIM14      | 1.28E-09 | -0.286262558 | 0.115 | 0.309 | 2.79E-05    |
| OXA1L       | 1.29E-09 | -0.346915032 | 0.296 | 0.526 | 2.82E-05    |
| IGBP1       | 1.43E-09 | -0.302094232 | 0.189 | 0.412 | 3.11E-05    |
| SLA         | 1.56E-09 | 0.435334645  | 0.628 | 0.478 | 3.41E-05    |
| KYNU        | 1.67E-09 | 0.438153199  | 0.544 | 0.353 | 3.65E-05    |
| PET100      | 1.75E-09 | 0.404538695  | 0.673 | 0.522 | 3.81E-05    |
| NCF1        | 1.84E-09 | -0.473965696 | 0.267 | 0.485 | 4.00E-05    |
| CCNI        | 2.22E-09 | -0.267979079 | 0.811 | 0.93  | 4.84E-05    |
| ZFAND1      | 2.29E-09 | -0.257689245 | 0.074 | 0.239 | 5.00E-05    |
| ARHGDI1A    | 2.71E-09 | 0.377794376  | 0.692 | 0.581 | 5.91E-05    |
| RNASE2      | 2.76E-09 | -0.377202341 | 0.282 | 0.515 | 6.01E-05    |
| JKAMP       | 3.22E-09 | -0.252087869 | 0.086 | 0.257 | 7.03E-05    |
| MNDA        | 3.25E-09 | -0.360305689 | 0.742 | 0.879 | 7.09E-05    |
| FOS         | 3.28E-09 | -0.266707234 | 0.99  | 0.985 | 7.16E-05    |
| LY86        | 3.29E-09 | -0.329986274 | 0.437 | 0.669 | 7.18E-05    |
| CD302       | 3.40E-09 | -0.320444961 | 0.621 | 0.842 | 7.42E-05    |
| PHF3        | 3.51E-09 | -0.271757713 | 0.112 | 0.298 | 7.65E-05    |
| ANKRD28     | 3.62E-09 | 0.495390538  | 0.406 | 0.21  | 7.90E-05    |
| VASP        | 3.72E-09 | 0.402117138  | 0.649 | 0.526 | 8.11E-05    |
| MRPL34      | 3.95E-09 | -0.253452198 | 0.081 | 0.25  | 8.62E-05    |
| PSMB9       | 4.05E-09 | -0.293923631 | 0.317 | 0.562 | 8.84E-05    |
| S100P       | 4.19E-09 | 0.427199275  | 0.15  | 0.015 | 9.14E-05    |
| EIF3M       | 4.25E-09 | -0.28095712  | 0.52  | 0.724 | 9.27E-05    |
| METTL7B     | 4.34E-09 | 0.383732384  | 0.155 | 0.018 | 9.46E-05    |
| MRPS34      | 4.34E-09 | -0.252322184 | 0.217 | 0.449 | 9.47E-05    |
| RNASSET2    | 4.40E-09 | -0.362890231 | 0.542 | 0.732 | 9.59E-05    |
| TFRC        | 4.86E-09 | 0.52234632   | 0.401 | 0.217 | 0.000105903 |
| CD37        | 4.99E-09 | -0.286436339 | 0.692 | 0.853 | 0.000108754 |
| G0S2        | 5.14E-09 | 0.540962745  | 0.525 | 0.312 | 0.000112168 |
| PPP1CC      | 5.23E-09 | -0.325665841 | 0.317 | 0.551 | 0.000114119 |
| MIR4435-2HG | 5.33E-09 | 0.503956175  | 0.456 | 0.283 | 0.000116336 |
| EMP3        | 5.37E-09 | 0.324954731  | 0.959 | 0.926 | 0.000117055 |
| SLC11A1     | 5.51E-09 | 0.390722891  | 0.819 | 0.783 | 0.000120193 |
| JUNB        | 5.62E-09 | -0.261388118 | 0.962 | 0.971 | 0.000122468 |
| PSMG2       | 5.89E-09 | -0.321355788 | 0.265 | 0.485 | 0.000128463 |
| MBNL1       | 6.10E-09 | -0.294406204 | 0.47  | 0.706 | 0.00013309  |
| CAMK1       | 6.76E-09 | -0.293289754 | 0.1   | 0.272 | 0.000147371 |
| GPX4        | 6.90E-09 | -0.298617092 | 0.716 | 0.846 | 0.000150372 |
| C1orf162    | 8.30E-09 | -0.275151403 | 0.816 | 0.952 | 0.000180964 |
| MAT2B       | 8.48E-09 | -0.328472742 | 0.174 | 0.371 | 0.000184913 |
| PTPN18      | 8.60E-09 | -0.280090479 | 0.16  | 0.357 | 0.000187499 |
| CD44        | 8.76E-09 | 0.337917364  | 0.85  | 0.779 | 0.000191139 |
| RILPL2      | 9.54E-09 | 0.316419456  | 0.764 | 0.662 | 0.000208149 |
| ASGR1       | 9.70E-09 | -0.293144264 | 0.263 | 0.493 | 0.00021162  |
| BCL3        | 1.00E-08 | 0.381831754  | 0.47  | 0.279 | 0.000219116 |
| CD14        | 1.14E-08 | 0.34748336   | 0.869 | 0.86  | 0.000248322 |
| SLC8A1      | 1.16E-08 | -0.31694963  | 0.153 | 0.342 | 0.000252815 |
| IFI6        | 1.16E-08 | 0.479440428  | 0.329 | 0.151 | 0.000253348 |
| BAZ1A       | 1.16E-08 | 0.464823938  | 0.609 | 0.467 | 0.000253563 |
| DAZAP2      | 1.23E-08 | 0.309265919  | 0.869 | 0.842 | 0.000267505 |
| TXN         | 1.27E-08 | 0.357104838  | 0.74  | 0.665 | 0.000276777 |

|            |          |              |       |       |             |
|------------|----------|--------------|-------|-------|-------------|
| RELB       | 1.30E-08 | 0.419753106  | 0.346 | 0.169 | 0.000283466 |
| MRPS21     | 1.31E-08 | -0.316544455 | 0.308 | 0.559 | 0.000284856 |
| CSK        | 1.36E-08 | -0.277614979 | 0.303 | 0.551 | 0.000295555 |
| TLR2       | 1.41E-08 | 0.428108514  | 0.57  | 0.426 | 0.00030815  |
| UTRN       | 1.41E-08 | -0.278296569 | 0.198 | 0.419 | 0.0003084   |
| BZW1       | 1.52E-08 | 0.391216216  | 0.573 | 0.415 | 0.00033139  |
| DDX21      | 1.59E-08 | 0.433343631  | 0.666 | 0.522 | 0.000346869 |
| C14orf166  | 1.60E-08 | -0.30692729  | 0.432 | 0.643 | 0.000348045 |
| GNA15      | 1.61E-08 | 0.435084125  | 0.391 | 0.232 | 0.000351843 |
| IFRD1      | 1.61E-08 | -0.346465663 | 0.198 | 0.397 | 0.000352012 |
| IER2       | 1.62E-08 | -0.352088004 | 0.85  | 0.926 | 0.000353021 |
| SNHG7      | 1.64E-08 | -0.319313938 | 0.148 | 0.338 | 0.000358624 |
| CLEC5A     | 1.72E-08 | 0.319301025  | 0.141 | 0.015 | 0.000374786 |
| FLI1       | 1.73E-08 | -0.268141658 | 0.184 | 0.386 | 0.000377619 |
| ABHD5      | 1.76E-08 | -0.416100954 | 0.21  | 0.412 | 0.000382799 |
| GNPDA1     | 1.80E-08 | -0.253114039 | 0.091 | 0.254 | 0.000393434 |
| POLR1D     | 2.02E-08 | -0.276897075 | 0.279 | 0.515 | 0.000440293 |
| NSL1       | 2.20E-08 | -0.256288895 | 0.122 | 0.301 | 0.000480422 |
| HMGN3      | 2.35E-08 | -0.264197482 | 0.267 | 0.489 | 0.000512983 |
| PKM        | 2.42E-08 | 0.289742258  | 0.866 | 0.842 | 0.000526835 |
| BNIP3L     | 2.47E-08 | -0.251140769 | 0.461 | 0.695 | 0.00053819  |
| LINC00936  | 2.56E-08 | -0.378184314 | 0.399 | 0.614 | 0.000558614 |
| CD33       | 2.81E-08 | -0.282138327 | 0.229 | 0.445 | 0.000611814 |
| RETN       | 3.27E-08 | 0.650299307  | 0.298 | 0.132 | 0.000712337 |
| NPM1       | 3.48E-08 | -0.282928066 | 0.587 | 0.82  | 0.00075887  |
| RSL1D1     | 3.53E-08 | -0.3127124   | 0.365 | 0.577 | 0.000770079 |
| CECR1      | 3.54E-08 | -0.287910961 | 0.437 | 0.676 | 0.000771065 |
| IL13RA1    | 3.62E-08 | -0.291871693 | 0.22  | 0.43  | 0.000788774 |
| IGLV2-14   | 3.79E-08 | -0.310982723 | 0.105 | 0.268 | 0.000825556 |
| NDUFB9     | 3.79E-08 | 0.320662308  | 0.74  | 0.669 | 0.000826424 |
| CD163      | 3.79E-08 | 0.286486774  | 0.945 | 0.938 | 0.000827424 |
| RGL1       | 3.86E-08 | 0.432977929  | 0.282 | 0.118 | 0.000841058 |
| JAK3       | 3.96E-08 | 0.321698545  | 0.212 | 0.062 | 0.000864477 |
| ATP5A1     | 4.17E-08 | -0.323560257 | 0.401 | 0.614 | 0.000909682 |
| NDFIP1     | 4.22E-08 | -0.270368046 | 0.346 | 0.585 | 0.00092112  |
| TNFAIP2    | 4.29E-08 | -0.301985894 | 0.26  | 0.482 | 0.000934686 |
| LCP1       | 4.43E-08 | 0.27354392   | 0.909 | 0.879 | 0.000965149 |
| ATM        | 5.02E-08 | -0.255061085 | 0.072 | 0.217 | 0.001094569 |
| STEAP4     | 5.10E-08 | 0.274362199  | 0.103 | 0     | 0.001112771 |
| TNRC6B     | 5.11E-08 | -0.285853224 | 0.103 | 0.268 | 0.001113929 |
| GSN        | 5.13E-08 | -0.324463632 | 0.222 | 0.419 | 0.001119072 |
| PHLDA1     | 5.17E-08 | 0.400755488  | 0.2   | 0.055 | 0.001127077 |
| PTX3       | 5.20E-08 | 0.46692242   | 0.251 | 0.092 | 0.001133225 |
| ARL6IP4    | 5.38E-08 | -0.258787429 | 0.489 | 0.706 | 0.001173318 |
| CRIP1      | 5.43E-08 | -0.326337746 | 0.687 | 0.846 | 0.001184573 |
| CD52       | 5.43E-08 | -0.368957293 | 0.599 | 0.783 | 0.001184595 |
| FCGR1B     | 5.49E-08 | 0.446935394  | 0.356 | 0.188 | 0.001197875 |
| NOTCH2     | 5.67E-08 | -0.2957992   | 0.177 | 0.371 | 0.001237185 |
| RASA2      | 5.92E-08 | 0.404566639  | 0.289 | 0.132 | 0.0012909   |
| CTSB       | 6.06E-08 | 0.355425098  | 0.936 | 0.919 | 0.00132075  |
| CD83       | 6.95E-08 | -0.338812254 | 0.468 | 0.699 | 0.001515561 |
| IFNGR2     | 7.48E-08 | 0.415235795  | 0.68  | 0.574 | 0.00163069  |
| SH3GLB1    | 7.55E-08 | 0.446975458  | 0.566 | 0.452 | 0.00164599  |
| UQCR10     | 8.13E-08 | -0.303784698 | 0.616 | 0.82  | 0.001772829 |
| LILRA2     | 8.20E-08 | -0.259880487 | 0.327 | 0.562 | 0.0017883   |
| CKS2       | 8.30E-08 | -0.339571839 | 0.224 | 0.419 | 0.001809854 |
| RNF44      | 8.41E-08 | -0.261134971 | 0.072 | 0.213 | 0.001833322 |
| TMEM167A   | 8.71E-08 | 0.371998573  | 0.702 | 0.614 | 0.001899718 |
| CLEC4E     | 8.89E-08 | -0.314435799 | 0.566 | 0.754 | 0.001937916 |
| ID2        | 9.14E-08 | -0.410208923 | 0.406 | 0.603 | 0.001993535 |
| SQLI       | 9.19E-08 | 0.375676309  | 0.241 | 0.088 | 0.00200339  |
| DPYSL2     | 9.43E-08 | -0.307632873 | 0.169 | 0.36  | 0.002056442 |
| HSD17B11   | 9.91E-08 | -0.312376022 | 0.518 | 0.71  | 0.002161742 |
| ALDH2      | 9.98E-08 | -0.303467793 | 0.344 | 0.559 | 0.002175385 |
| THBD       | 1.13E-07 | 0.466951907  | 0.401 | 0.224 | 0.00245855  |
| GLRX       | 1.17E-07 | -0.279354202 | 0.449 | 0.673 | 0.002558901 |
| RGS18      | 1.20E-07 | -0.267194757 | 0.217 | 0.423 | 0.002606109 |
| PLA2G7     | 1.27E-07 | 0.304401689  | 0.162 | 0.033 | 0.002768358 |
| GLTSCR2    | 1.30E-07 | -0.285644423 | 0.344 | 0.566 | 0.002834601 |
| CTB-61M7.2 | 1.31E-07 | 0.387203035  | 0.284 | 0.121 | 0.002853902 |

|            |          |              |       |       |             |
|------------|----------|--------------|-------|-------|-------------|
| HLA-DMA    | 1.42E-07 | -0.252669627 | 0.442 | 0.647 | 0.003086354 |
| PTGER2     | 1.44E-07 | 0.420779807  | 0.496 | 0.346 | 0.003146866 |
| MRPS24     | 1.45E-07 | -0.277408149 | 0.255 | 0.467 | 0.003154659 |
| EIF4B      | 1.56E-07 | -0.262113027 | 0.442 | 0.654 | 0.003403061 |
| SNHG8      | 1.75E-07 | -0.292583042 | 0.339 | 0.57  | 0.003813915 |
| BACH1      | 1.87E-07 | 0.416857266  | 0.544 | 0.401 | 0.004068766 |
| LAP3       | 1.89E-07 | 0.360581335  | 0.449 | 0.294 | 0.004111827 |
| TREM1      | 1.90E-07 | 0.396883711  | 0.544 | 0.397 | 0.004150474 |
| NDUFS7     | 1.93E-07 | -0.282270726 | 0.406 | 0.618 | 0.004200939 |
| FRMD4B     | 2.01E-07 | -0.305668358 | 0.045 | 0.162 | 0.004384256 |
| UBE2J1     | 2.16E-07 | 0.36636228   | 0.656 | 0.577 | 0.004712598 |
| RPAIN      | 2.22E-07 | -0.25016835  | 0.093 | 0.239 | 0.00483616  |
| EMP1       | 2.43E-07 | 0.442740964  | 0.208 | 0.07  | 0.005297923 |
| UBE2D1     | 2.45E-07 | 0.310339117  | 0.695 | 0.614 | 0.005342582 |
| TNFAIP6    | 2.50E-07 | 0.694685223  | 0.363 | 0.213 | 0.005444679 |
| APLP2      | 2.67E-07 | 0.33313803   | 0.845 | 0.798 | 0.005818892 |
| CES1       | 2.83E-07 | 0.386962051  | 0.301 | 0.143 | 0.00616381  |
| CORO1B     | 2.86E-07 | -0.277451278 | 0.203 | 0.39  | 0.006243508 |
| IL10RA     | 2.91E-07 | -0.306737577 | 0.303 | 0.511 | 0.006353134 |
| STK17A     | 2.96E-07 | 0.358179881  | 0.296 | 0.14  | 0.00645339  |
| MESDC1     | 3.20E-07 | 0.323801684  | 0.217 | 0.077 | 0.006980568 |
| CDKN2D     | 3.21E-07 | 0.353829564  | 0.351 | 0.18  | 0.007000825 |
| FTH1       | 3.35E-07 | 0.264104464  | 1     | 1     | 0.007308109 |
| CSRNP1     | 3.36E-07 | 0.416466265  | 0.482 | 0.327 | 0.007333036 |
| MAP2K1     | 3.51E-07 | 0.395690354  | 0.582 | 0.489 | 0.007659114 |
| JAZF1      | 3.61E-07 | -0.252801148 | 0.129 | 0.29  | 0.007861965 |
| MX1        | 3.63E-07 | 0.349849248  | 0.134 | 0.022 | 0.007911986 |
| SBNO2      | 3.69E-07 | 0.320263738  | 0.184 | 0.055 | 0.008053512 |
| FOSB       | 4.46E-07 | -0.273273984 | 0.74  | 0.864 | 0.009736066 |
| HIPK2      | 4.48E-07 | 0.396246911  | 0.346 | 0.195 | 0.009768451 |
| HPGD       | 5.04E-07 | 0.445791645  | 0.248 | 0.107 | 0.01099061  |
| TMBIM4     | 5.44E-07 | -0.269375099 | 0.451 | 0.662 | 0.011859896 |
| HIST2H2AA4 | 6.13E-07 | 0.314610131  | 0.229 | 0.088 | 0.01336864  |
| RBP7       | 6.41E-07 | -0.295810777 | 0.294 | 0.496 | 0.013978252 |
| SNHG12     | 6.55E-07 | -0.265737053 | 0.11  | 0.257 | 0.014291395 |
| ITGA4      | 7.16E-07 | -0.299218852 | 0.241 | 0.426 | 0.015622815 |
| IL1R1      | 7.21E-07 | 0.31375186   | 0.131 | 0.022 | 0.01572682  |
| USB1       | 7.62E-07 | 0.303996719  | 0.232 | 0.092 | 0.016622792 |
| ARL6IP5    | 7.62E-07 | -0.279131784 | 0.499 | 0.717 | 0.016623389 |
| FCAR       | 8.31E-07 | 0.307879985  | 0.298 | 0.143 | 0.018121032 |
| APEX1      | 8.35E-07 | -0.280528037 | 0.198 | 0.375 | 0.018213072 |
| SERPINB10  | 8.63E-07 | 0.268929542  | 0.117 | 0.015 | 0.018819613 |
| PTPRE      | 8.75E-07 | 0.318725038  | 0.795 | 0.743 | 0.019072957 |
| GSTO1      | 8.79E-07 | 0.335852912  | 0.671 | 0.57  | 0.019165037 |
| MPHOSPH6   | 9.15E-07 | 0.365027912  | 0.339 | 0.184 | 0.019964633 |
| DYSF       | 9.21E-07 | 0.273517167  | 0.234 | 0.088 | 0.020084094 |
| PLBD1      | 9.79E-07 | 0.351061493  | 0.649 | 0.548 | 0.021344999 |
| ATG16L2    | 9.80E-07 | -0.257705514 | 0.153 | 0.32  | 0.021382712 |
| EIF4A2     | 1.02E-06 | -0.250371698 | 0.339 | 0.548 | 0.022174759 |
| SMIM3      | 1.07E-06 | 0.41555917   | 0.291 | 0.151 | 0.023292578 |
| TMEM120A   | 1.35E-06 | 0.36054354   | 0.387 | 0.254 | 0.029369323 |
| POR        | 1.37E-06 | 0.312503952  | 0.289 | 0.14  | 0.029955243 |
| HSPA6      | 1.46E-06 | -0.311857072 | 0.079 | 0.206 | 0.031786179 |
| EIF3L      | 1.62E-06 | -0.256158343 | 0.556 | 0.746 | 0.035278298 |
| TTC3       | 1.80E-06 | -0.265382009 | 0.131 | 0.272 | 0.039197922 |
| ZC3H12A    | 1.82E-06 | 0.388116194  | 0.401 | 0.25  | 0.03958482  |
| TRMT1      | 1.89E-06 | -0.275733943 | 0.232 | 0.408 | 0.041152755 |
| PDE4A      | 2.19E-06 | 0.292464028  | 0.184 | 0.062 | 0.047782332 |
| CDC42      | 2.29E-06 | 0.319368393  | 0.776 | 0.768 | 0.049928887 |

List of differentially expressed genes of S100A8 TMo in reperfusion stage (PR versus EP)

| gene   | p_val    | avg logFC   | pct.1 | pct.2 | p_val_adj |
|--------|----------|-------------|-------|-------|-----------|
| VCAN   | 2.24E-30 | 0.754061723 | 0.963 | 0.845 | 4.88E-26  |
| THBS1  | 2.48E-28 | 1.22191915  | 0.873 | 0.53  | 5.42E-24  |
| SRGN   | 1.23E-24 | 0.475324039 | 0.997 | 0.989 | 2.68E-20  |
| SAT1   | 6.69E-24 | 0.608034365 | 0.973 | 0.928 | 1.46E-19  |
| S100A9 | 2.40E-22 | 0.745420421 | 0.99  | 0.978 | 5.24E-18  |
| ACSL1  | 6.74E-22 | 1.092354744 | 0.679 | 0.282 | 1.47E-17  |

|          |          |              |       |       |             |
|----------|----------|--------------|-------|-------|-------------|
| HLA-DRB5 | 6.51E-21 | -0.978050161 | 0.157 | 0.547 | 1.42E-16    |
| SAMSN1   | 1.60E-19 | 0.798672552  | 0.833 | 0.497 | 3.50E-15    |
| FPR2     | 3.73E-18 | 0.968634026  | 0.538 | 0.155 | 8.14E-14    |
| RPS13    | 5.96E-18 | -0.380958587 | 0.993 | 0.983 | 1.30E-13    |
| RPS29    | 8.22E-18 | 0.711295451  | 0.816 | 0.575 | 1.79E-13    |
| S100A12  | 9.72E-18 | 0.529752137  | 0.973 | 0.939 | 2.12E-13    |
| SLC39A8  | 4.27E-17 | 1.084179474  | 0.348 | 0.017 | 9.30E-13    |
| TNFAIP6  | 7.55E-17 | 0.971843616  | 0.545 | 0.144 | 1.65E-12    |
| PAG1     | 9.73E-17 | 0.913574631  | 0.565 | 0.193 | 2.12E-12    |
| SELL     | 1.16E-16 | 0.806635335  | 0.739 | 0.464 | 2.53E-12    |
| NAMPT    | 1.52E-16 | 0.654943894  | 0.916 | 0.696 | 3.32E-12    |
| TRMT6    | 9.37E-16 | 0.963823361  | 0.395 | 0.061 | 2.04E-11    |
| ACTB     | 4.44E-15 | 0.252749088  | 1     | 1     | 9.67E-11    |
| CKAP4    | 7.14E-15 | 0.850118165  | 0.518 | 0.171 | 1.56E-10    |
| RPL10    | 8.02E-15 | -0.334246438 | 0.99  | 0.989 | 1.75E-10    |
| RPS3A    | 1.04E-14 | -0.311440071 | 0.987 | 0.994 | 2.27E-10    |
| CST3     | 4.46E-14 | -0.408681832 | 0.97  | 0.945 | 9.72E-10    |
| PLAC8    | 4.79E-14 | 0.92722535   | 0.552 | 0.238 | 1.04E-09    |
| BCL2A1   | 8.34E-14 | 0.652375926  | 0.803 | 0.497 | 1.82E-09    |
| H3F3B    | 1.08E-13 | 0.380075874  | 0.946 | 0.945 | 2.35E-09    |
| RPL11    | 1.29E-13 | -0.272874479 | 0.993 | 0.994 | 2.81E-09    |
| MALAT1   | 1.36E-13 | -0.312962876 | 1     | 1     | 2.96E-09    |
| AREG     | 1.40E-13 | 0.870305487  | 0.742 | 0.425 | 3.05E-09    |
| DEFA3    | 3.46E-13 | -1.718662953 | 0.03  | 0.243 | 7.54E-09    |
| VIM      | 5.68E-13 | -0.327715559 | 0.983 | 0.994 | 1.24E-08    |
| PABPC1   | 6.72E-13 | -0.511963615 | 0.779 | 0.89  | 1.47E-08    |
| RPL30    | 8.29E-13 | -0.295825835 | 1     | 1     | 1.81E-08    |
| GPX4     | 8.93E-13 | -0.742767041 | 0.385 | 0.657 | 1.95E-08    |
| RETN     | 1.88E-12 | 1.076883768  | 0.498 | 0.199 | 4.10E-08    |
| FCER1G   | 2.18E-12 | 0.438661455  | 0.99  | 0.961 | 4.75E-08    |
| HLA-DQB1 | 2.53E-12 | -0.761925466 | 0.094 | 0.348 | 5.51E-08    |
| NKG7     | 2.73E-12 | 0.747450036  | 0.408 | 0.105 | 5.95E-08    |
| MT-CYB   | 3.38E-12 | 0.441254453  | 0.993 | 0.972 | 7.37E-08    |
| CRIP1    | 3.40E-12 | -0.940450568 | 0.341 | 0.597 | 7.43E-08    |
| S100A8   | 3.62E-12 | 0.290724157  | 0.997 | 1     | 7.90E-08    |
| JUN      | 3.93E-12 | -0.811068105 | 0.294 | 0.575 | 8.58E-08    |
| ASPH     | 6.24E-12 | 0.818193826  | 0.388 | 0.099 | 1.36E-07    |
| FPR1     | 6.47E-12 | 0.575470492  | 0.749 | 0.519 | 1.41E-07    |
| RPL14    | 1.48E-11 | -0.375955959 | 0.923 | 0.961 | 3.23E-07    |
| AGFG1    | 5.79E-11 | 0.729568448  | 0.532 | 0.254 | 1.26E-06    |
| RPL18    | 7.08E-11 | -0.321127677 | 0.957 | 0.972 | 1.55E-06    |
| RPL5     | 7.49E-11 | -0.368466347 | 0.839 | 0.923 | 1.63E-06    |
| CFL1     | 8.36E-11 | 0.369263129  | 0.94  | 0.856 | 1.82E-06    |
| CD63     | 1.24E-10 | 0.621247309  | 0.699 | 0.481 | 2.70E-06    |
| MCEMP1   | 1.42E-10 | 0.755487274  | 0.555 | 0.304 | 3.10E-06    |
| CD74     | 1.65E-10 | -0.472996047 | 0.856 | 0.906 | 3.61E-06    |
| NACA     | 1.88E-10 | -0.358115933 | 0.923 | 0.956 | 4.10E-06    |
| TYMP     | 2.02E-10 | 0.565201878  | 0.709 | 0.47  | 4.41E-06    |
| CD36     | 3.97E-10 | 0.745040548  | 0.405 | 0.144 | 8.67E-06    |
| SEC11A   | 4.51E-10 | -0.579790445 | 0.455 | 0.702 | 9.84E-06    |
| TPM4     | 4.71E-10 | 0.700104251  | 0.512 | 0.232 | 1.03E-05    |
| AP1S2    | 4.86E-10 | -0.569220883 | 0.522 | 0.718 | 1.06E-05    |
| FOS      | 5.05E-10 | -0.33379616  | 0.963 | 0.983 | 1.10E-05    |
| CYBA     | 5.77E-10 | 0.413937124  | 0.849 | 0.79  | 1.26E-05    |
| STXBP2   | 7.47E-10 | 0.471655469  | 0.876 | 0.746 | 1.63E-05    |
| BTG1     | 7.69E-10 | -0.533557195 | 0.602 | 0.757 | 1.68E-05    |
| SERP1    | 8.60E-10 | -0.447025766 | 0.732 | 0.845 | 1.88E-05    |
| IL1R2    | 1.01E-09 | 0.730305337  | 0.602 | 0.354 | 2.21E-05    |
| FGL2     | 1.03E-09 | -0.605601603 | 0.274 | 0.536 | 2.24E-05    |
| CLU      | 1.23E-09 | 0.723291384  | 0.338 | 0.094 | 2.68E-05    |
| PFKFB3   | 1.34E-09 | 0.647284679  | 0.301 | 0.061 | 2.91E-05    |
| LCP1     | 1.60E-09 | 0.437489357  | 0.833 | 0.669 | 3.50E-05    |
| S100P    | 1.92E-09 | 0.724070212  | 0.268 | 0.044 | 4.19E-05    |
| ADM      | 2.79E-09 | 0.704522289  | 0.361 | 0.116 | 6.09E-05    |
| G0S2     | 3.20E-09 | 0.665311232  | 0.348 | 0.105 | 6.98E-05    |
| LGALS2   | 3.55E-09 | -0.607226171 | 0.054 | 0.232 | 7.74E-05    |
| BAZ1A    | 3.74E-09 | 0.646296069  | 0.515 | 0.282 | 8.16E-05    |
| RUNX1    | 3.94E-09 | 0.662655592  | 0.395 | 0.16  | 8.60E-05    |
| NUP214   | 4.04E-09 | -0.520805705 | 0.211 | 0.47  | 8.82E-05    |
| PGAM1    | 4.79E-09 | 0.503233129  | 0.609 | 0.365 | 0.000104516 |



|          |          |              |       |       |             |
|----------|----------|--------------|-------|-------|-------------|
| GK5      | 6.00E-09 | 0.658479005  | 0.181 | 0.006 | 0.000130944 |
| HVCN1    | 6.43E-09 | -0.394808861 | 0.01  | 0.138 | 0.000140189 |
| SERPINB1 | 6.87E-09 | 0.342960441  | 0.91  | 0.823 | 0.000149723 |
| SLC25A6  | 7.28E-09 | -0.48477251  | 0.565 | 0.729 | 0.000158813 |
| EVI2B    | 9.19E-09 | -0.641593065 | 0.411 | 0.619 | 0.000200329 |
| HP       | 9.40E-09 | 0.61143513   | 0.284 | 0.061 | 0.00020506  |
| UPP1     | 9.97E-09 | 0.623045552  | 0.565 | 0.348 | 0.000217452 |
| CTSS     | 1.06E-08 | -0.337108689 | 0.809 | 0.878 | 0.000231258 |
| TPM3     | 1.19E-08 | 0.453345649  | 0.776 | 0.597 | 0.000259606 |
| PKM      | 1.30E-08 | 0.498308991  | 0.742 | 0.591 | 0.000283847 |
| CST7     | 1.36E-08 | 0.71776288   | 0.274 | 0.061 | 0.000297487 |
| ARHGDI1A | 1.61E-08 | 0.634182779  | 0.505 | 0.282 | 0.000350895 |
| TIMP1    | 1.74E-08 | 0.783033592  | 0.766 | 0.608 | 0.000378915 |
| MYL6     | 1.74E-08 | 0.276210755  | 0.98  | 0.939 | 0.000379952 |
| HBB      | 1.80E-08 | -1.005077632 | 0.054 | 0.221 | 0.000392932 |
| RAB31    | 2.08E-08 | 0.559805571  | 0.635 | 0.448 | 0.000453648 |
| BZW1     | 2.15E-08 | 0.550359536  | 0.435 | 0.188 | 0.000467859 |
| MS4A7    | 2.30E-08 | -0.714243111 | 0.114 | 0.32  | 0.000500572 |
| TXNIP    | 3.42E-08 | -0.687020816 | 0.278 | 0.492 | 0.000745713 |
| RGS10    | 3.44E-08 | -0.574286933 | 0.144 | 0.354 | 0.000751164 |
| CD37     | 3.99E-08 | -0.473673363 | 0.518 | 0.74  | 0.000869772 |
| EEF1D    | 4.05E-08 | -0.35024627  | 0.866 | 0.939 | 0.000883516 |
| RGS2     | 4.48E-08 | -0.483007408 | 0.538 | 0.746 | 0.000976682 |
| GRINA    | 4.86E-08 | 0.516733469  | 0.652 | 0.448 | 0.00105883  |
| SLC11A1  | 5.28E-08 | 0.514992677  | 0.682 | 0.481 | 0.001152226 |
| AQP9     | 5.40E-08 | 0.523911399  | 0.418 | 0.177 | 0.001177841 |
| HSPA8    | 6.53E-08 | -0.458327898 | 0.288 | 0.525 | 0.001423857 |
| MNDA     | 6.61E-08 | -0.427684837 | 0.739 | 0.873 | 0.00144079  |
| RPS4X    | 8.90E-08 | -0.280894714 | 0.933 | 0.945 | 0.001941663 |
| DOK2     | 1.13E-07 | -0.466429233 | 0.12  | 0.32  | 0.002458226 |
| CD14     | 1.17E-07 | 0.56384562   | 0.672 | 0.503 | 0.002549171 |
| SLC25A5  | 1.26E-07 | -0.528792835 | 0.418 | 0.624 | 0.002742797 |
| RNASE6   | 1.27E-07 | -0.576342904 | 0.214 | 0.42  | 0.002767434 |
| PLSCR1   | 1.37E-07 | 0.582507766  | 0.535 | 0.315 | 0.00298538  |
| CSTA     | 1.57E-07 | -0.415150784 | 0.783 | 0.878 | 0.00341496  |
| GCA      | 1.79E-07 | 0.384941047  | 0.843 | 0.823 | 0.003896096 |
| ARPC3    | 2.42E-07 | -0.286738904 | 0.819 | 0.923 | 0.005270576 |
| RBMS1    | 2.48E-07 | 0.64600808   | 0.441 | 0.227 | 0.005418598 |
| STOM     | 2.71E-07 | 0.450860681  | 0.348 | 0.127 | 0.005909926 |
| SOD2     | 2.72E-07 | 0.390249758  | 0.789 | 0.586 | 0.005924617 |
| MS4A4A   | 3.16E-07 | 0.462090154  | 0.284 | 0.088 | 0.00688161  |
| EVI2A    | 3.18E-07 | -0.512861657 | 0.084 | 0.254 | 0.00693268  |
| PICK1    | 3.34E-07 | -0.343793057 | 0.027 | 0.155 | 0.007279009 |
| FAM26F   | 3.34E-07 | -0.56629116  | 0.047 | 0.193 | 0.007286254 |
| MCTP2    | 3.41E-07 | 0.549797158  | 0.214 | 0.044 | 0.007431408 |
| TKT      | 3.73E-07 | -0.43526956  | 0.609 | 0.746 | 0.008144234 |
| C12orf57 | 4.68E-07 | -0.55565438  | 0.104 | 0.282 | 0.010196593 |
| RHOB     | 5.54E-07 | -0.511803487 | 0.405 | 0.608 | 0.012078048 |
| TNFAIP3  | 5.92E-07 | 0.58696074   | 0.559 | 0.32  | 0.0129026   |
| CPM      | 6.96E-07 | -0.393005878 | 0.033 | 0.16  | 0.015172856 |
| FXD5     | 7.77E-07 | -0.429553646 | 0.622 | 0.762 | 0.016939426 |
| METTL7B  | 7.86E-07 | 0.432334519  | 0.137 | 0.006 | 0.01714899  |
| GIMAP2   | 8.26E-07 | -0.377232826 | 0.05  | 0.193 | 0.01800569  |
| LRG1     | 8.94E-07 | 0.441833178  | 0.204 | 0.039 | 0.019499261 |
| RBKS     | 9.38E-07 | -0.469960232 | 0.06  | 0.21  | 0.020465676 |
| JUNB     | 9.67E-07 | -0.410462194 | 0.739 | 0.829 | 0.021086753 |
| SULT1A1  | 1.02E-06 | -0.432172787 | 0.127 | 0.309 | 0.022335044 |
| AMPH     | 1.05E-06 | -0.309589616 | 0.013 | 0.116 | 0.022816157 |
| PTCH2    | 1.05E-06 | -0.467758144 | 0.023 | 0.138 | 0.022917726 |
| MCL1     | 1.08E-06 | 0.345408787  | 0.816 | 0.68  | 0.023575284 |
| IFI30    | 1.28E-06 | 0.41462762   | 0.709 | 0.547 | 0.02794868  |
| HSD17B11 | 1.46E-06 | -0.472350209 | 0.331 | 0.541 | 0.031787473 |
| COMMD6   | 1.58E-06 | -0.319051434 | 0.562 | 0.751 | 0.034505658 |
| CLEC4E   | 1.61E-06 | -0.56042719  | 0.311 | 0.508 | 0.035072043 |
| DDX21    | 1.62E-06 | 0.53828902   | 0.508 | 0.315 | 0.035320066 |
| CD82     | 1.62E-06 | 0.48963867   | 0.201 | 0.044 | 0.035392094 |
| BTF3     | 1.63E-06 | -0.339133791 | 0.819 | 0.867 | 0.035490506 |
| F5       | 1.85E-06 | 0.454297816  | 0.217 | 0.055 | 0.040291082 |
| SLC2A3   | 1.88E-06 | 0.451074724  | 0.699 | 0.525 | 0.04089271  |
| APLP2    | 1.99E-06 | 0.431344115  | 0.706 | 0.569 | 0.043502331 |

|          |          |             |       |       |             |
|----------|----------|-------------|-------|-------|-------------|
| SERPINB2 | 2.07E-06 | 0.511804177 | 0.291 | 0.105 | 0.04520706  |
| MAFB     | 2.11E-06 | 0.52667567  | 0.632 | 0.453 | 0.04602892  |
| SQRDL    | 2.21E-06 | 0.512484488 | 0.351 | 0.166 | 0.048102448 |
| B4GALT5  | 2.27E-06 | 0.544715858 | 0.271 | 0.094 | 0.049466391 |

List of differentially expressed genes of IL1B KC in reperfusion stage (PR versus EP)

| gene      | p val    | avg logFC    | pct.1 | pct.2 | p val adj   |
|-----------|----------|--------------|-------|-------|-------------|
| PIM1      | 3.46E-17 | 1.092706203  | 0.676 | 0.117 | 7.54E-13    |
| NAMPT     | 1.30E-16 | 0.857958464  | 0.973 | 0.933 | 2.84E-12    |
| SOD2      | 3.76E-15 | 0.953435768  | 0.986 | 0.917 | 8.20E-11    |
| CTSL      | 3.98E-15 | 1.307436789  | 0.892 | 0.6   | 8.68E-11    |
| SOCS3     | 1.53E-14 | 1.015779864  | 0.851 | 0.558 | 3.33E-10    |
| ACSL1     | 4.03E-14 | 1.019626862  | 0.824 | 0.533 | 8.78E-10    |
| THBS1     | 5.82E-14 | 1.728442141  | 0.77  | 0.308 | 1.27E-09    |
| RHOB      | 6.93E-13 | -0.985495477 | 0.797 | 0.967 | 1.51E-08    |
| LITAF     | 9.52E-13 | 1.079806068  | 0.878 | 0.65  | 2.08E-08    |
| TNIP3     | 2.06E-12 | 1.11640451   | 0.378 | 0.008 | 4.50E-08    |
| DSE       | 2.12E-12 | 0.795549714  | 0.703 | 0.25  | 4.63E-08    |
| H3F3B     | 2.27E-12 | 0.635668098  | 1     | 0.983 | 4.95E-08    |
| NFKBIZ    | 2.87E-12 | -0.85562584  | 0.541 | 0.917 | 6.25E-08    |
| PIM3      | 3.19E-12 | 0.924817423  | 0.662 | 0.233 | 6.96E-08    |
| BATF      | 2.18E-11 | 0.911415094  | 0.473 | 0.083 | 4.75E-07    |
| ZFP36L2   | 2.87E-11 | -0.797996142 | 0.554 | 0.917 | 6.26E-07    |
| TIMP1     | 3.41E-11 | 0.905331466  | 0.959 | 0.933 | 7.43E-07    |
| CDKN1A    | 4.91E-11 | 0.88470146   | 0.878 | 0.633 | 1.07E-06    |
| HSP90AA1  | 5.40E-11 | 1.404129638  | 0.946 | 0.942 | 1.18E-06    |
| TMSB4X    | 5.82E-11 | -0.432367356 | 0.986 | 1     | 1.27E-06    |
| FPR1      | 6.34E-11 | 0.77890929   | 0.838 | 0.558 | 1.38E-06    |
| MIR3945HG | 1.28E-10 | 0.964583886  | 0.459 | 0.075 | 2.79E-06    |
| GIMAP2    | 1.56E-10 | -0.595905115 | 0.068 | 0.533 | 3.41E-06    |
| CXCR4     | 1.63E-10 | -0.816275807 | 0.5   | 0.842 | 3.56E-06    |
| HSPE1     | 1.86E-10 | 1.579556638  | 0.824 | 0.75  | 4.06E-06    |
| B4GALT5   | 2.18E-10 | 0.694410159  | 0.595 | 0.183 | 4.74E-06    |
| AREG      | 2.22E-10 | 0.9401154    | 0.878 | 0.458 | 4.85E-06    |
| MAP3K8    | 2.31E-10 | 0.707170328  | 0.892 | 0.658 | 5.04E-06    |
| SLC25A37  | 3.97E-10 | 0.861299781  | 0.581 | 0.183 | 8.66E-06    |
| NINJ1     | 4.66E-10 | 0.930249873  | 0.878 | 0.625 | 1.02E-05    |
| HSPD1     | 8.00E-10 | 1.838673195  | 0.757 | 0.65  | 1.74E-05    |
| DUSP1     | 9.40E-10 | -0.440354896 | 1     | 1     | 2.05E-05    |
| NFKB2     | 2.32E-09 | 0.71228654   | 0.514 | 0.15  | 5.05E-05    |
| C1orf162  | 2.38E-09 | -0.548370758 | 0.757 | 0.933 | 5.18E-05    |
| LDHA      | 2.47E-09 | 0.575303056  | 0.878 | 0.75  | 5.40E-05    |
| ATP13A3   | 3.10E-09 | 0.675090561  | 0.527 | 0.142 | 6.77E-05    |
| PABPC1    | 3.83E-09 | -0.41586248  | 0.986 | 0.992 | 8.35E-05    |
| BAG3      | 6.10E-09 | 1.367763597  | 0.486 | 0.142 | 0.00013305  |
| G0S2      | 6.77E-09 | 1.218861006  | 0.676 | 0.342 | 0.000147608 |
| HSPH1     | 6.91E-09 | 1.738798788  | 0.73  | 0.575 | 0.000150715 |
| DNAJA4    | 8.56E-09 | 1.126301691  | 0.338 | 0.042 | 0.000186634 |
| LRG1      | 1.57E-08 | 0.668819738  | 0.392 | 0.075 | 0.000342603 |
| LIMK2     | 1.74E-08 | 0.542888722  | 0.338 | 0.042 | 0.000380115 |
| HIF1A     | 1.96E-08 | 0.73042813   | 0.743 | 0.475 | 0.000427678 |
| TXNIP     | 2.05E-08 | -0.909363189 | 0.514 | 0.817 | 0.000447413 |
| RELB      | 2.15E-08 | 0.577804512  | 0.527 | 0.167 | 0.000468904 |
| IL1RN     | 2.46E-08 | 1.504303561  | 0.527 | 0.192 | 0.000537552 |
| HSPA5     | 2.83E-08 | 1.190958151  | 0.811 | 0.592 | 0.000616936 |
| PTPN2     | 3.36E-08 | 0.647134974  | 0.676 | 0.408 | 0.000732566 |
| PNP       | 4.87E-08 | 0.716538857  | 0.568 | 0.25  | 0.001061267 |
| KLF2      | 5.68E-08 | -0.628581537 | 0.351 | 0.792 | 0.00123818  |
| HSPB1     | 6.89E-08 | 1.937651851  | 0.743 | 0.558 | 0.001501785 |
| THBD      | 7.93E-08 | 0.784826987  | 0.473 | 0.142 | 0.001730002 |
| BCL3      | 8.18E-08 | 0.624751386  | 0.554 | 0.208 | 0.00178394  |
| FPR2      | 9.13E-08 | 0.949854316  | 0.541 | 0.233 | 0.001990646 |
| GIMAP4    | 1.33E-07 | -0.654287875 | 0.257 | 0.642 | 0.002904561 |
| FTH1      | 1.33E-07 | 0.32861885   | 1     | 1     | 0.002907881 |
| HLA-DRB5  | 1.98E-07 | -0.456482394 | 0.851 | 1     | 0.004323799 |
| AQP9      | 2.04E-07 | 0.676004758  | 0.581 | 0.258 | 0.004440209 |
| PVRL2     | 2.12E-07 | 0.702959522  | 0.419 | 0.133 | 0.004616867 |

|          |          |              |       |       |             |
|----------|----------|--------------|-------|-------|-------------|
| CALM2    | 3.77E-07 | -0.468693668 | 0.851 | 0.942 | 0.008226876 |
| IFNGR1   | 4.34E-07 | -0.482919429 | 0.514 | 0.858 | 0.009459625 |
| BIRC3    | 4.35E-07 | 0.602238683  | 0.662 | 0.35  | 0.009489338 |
| ARHGDIB  | 4.78E-07 | -0.47164867  | 0.757 | 0.942 | 0.010434266 |
| FCGR1B   | 5.36E-07 | 0.753777736  | 0.446 | 0.142 | 0.011687137 |
| SERPINB1 | 6.44E-07 | 0.647941388  | 0.851 | 0.858 | 0.014037904 |
| TRIP10   | 6.96E-07 | 0.389891496  | 0.216 | 0.008 | 0.015184364 |
| C15orf48 | 7.71E-07 | 1.201955196  | 0.338 | 0.075 | 0.01682024  |
| UPP1     | 8.63E-07 | 0.653365123  | 0.77  | 0.592 | 0.018820566 |
| SAMSN1   | 8.95E-07 | 0.585572368  | 0.932 | 0.792 | 0.019519101 |
| FOS      | 9.07E-07 | -0.333921065 | 0.973 | 1     | 0.019769643 |
| LMNA     | 9.89E-07 | 0.724950599  | 0.365 | 0.092 | 0.021577586 |
| SLC2A3   | 1.06E-06 | 0.722880271  | 0.649 | 0.392 | 0.023037051 |
| CACYBP   | 1.53E-06 | 0.689450514  | 0.635 | 0.425 | 0.033333956 |
| MEF2C    | 1.54E-06 | -0.494021114 | 0.203 | 0.575 | 0.033526309 |
| OPTN     | 1.62E-06 | 0.312302807  | 0.203 | 0.008 | 0.035418546 |
| FLI1     | 1.96E-06 | -0.396131545 | 0.189 | 0.542 | 0.042765564 |
| GK       | 2.12E-06 | 0.757715954  | 0.676 | 0.4   | 0.046268396 |
| C10orf54 | 2.13E-06 | -0.414519092 | 0.73  | 0.917 | 0.046453855 |
| HMGN3    | 2.26E-06 | -0.499299625 | 0.311 | 0.683 | 0.049193088 |

**Table 5: List of DEGs of mononuclear phagocyte clusters in overall stage (PR versus PP)**

List of differentially expressed genes of C1QC KC in overall stage (PR versus PP)

| gene          | p_val     | avg_logFC    | pct.1 | pct.2 | p_val_adj |
|---------------|-----------|--------------|-------|-------|-----------|
| SOD2          | 3.44E-135 | 1.601678008  | 0.985 | 0.69  | 7.49E-131 |
| HSP90AA1      | 9.61E-134 | 1.944290828  | 0.983 | 0.874 | 2.10E-129 |
| HSPD1         | 1.19E-131 | 2.175357118  | 0.937 | 0.521 | 2.59E-127 |
| HSPH1         | 3.88E-130 | 2.318295652  | 0.899 | 0.355 | 8.47E-126 |
| SOCS3         | 2.39E-126 | 1.54513476   | 0.895 | 0.267 | 5.21E-122 |
| BAG3          | 1.04E-115 | 2.03100127   | 0.727 | 0.071 | 2.26E-111 |
| HSPE1         | 4.00E-111 | 1.872644533  | 0.918 | 0.592 | 8.73E-107 |
| HSPB1         | 2.04E-110 | 2.17386554   | 0.91  | 0.521 | 4.45E-106 |
| HSPA1A        | 1.22E-108 | 1.697704987  | 0.979 | 0.748 | 2.65E-104 |
| GOS2          | 1.50E-106 | 2.122737602  | 0.739 | 0.098 | 3.27E-102 |
| HSPA5         | 4.81E-102 | 1.537160465  | 0.924 | 0.594 | 1.05E-97  |
| BATF          | 4.17E-101 | 1.183950729  | 0.668 | 0.063 | 9.09E-97  |
| LITAF         | 1.46E-98  | 1.346640383  | 0.891 | 0.517 | 3.18E-94  |
| CDKN1A        | 5.25E-93  | 1.246162565  | 0.908 | 0.481 | 1.15E-88  |
| DNAJA4        | 5.73E-92  | 1.4911110766 | 0.59  | 0.035 | 1.25E-87  |
| AREG          | 1.92E-91  | 1.533646326  | 0.859 | 0.257 | 4.18E-87  |
| NAMPT         | 1.12E-88  | 1.048233644  | 0.96  | 0.765 | 2.45E-84  |
| MT2A          | 5.95E-85  | 2.109339325  | 0.939 | 0.755 | 1.30E-80  |
| TMSB4X        | 2.01E-84  | -0.602941624 | 0.996 | 0.993 | 4.38E-80  |
| ICAM1         | 3.59E-80  | 1.414685496  | 0.83  | 0.396 | 7.83E-76  |
| THBS1         | 2.51E-76  | 1.525133145  | 0.788 | 0.299 | 5.47E-72  |
| C1QC          | 1.16E-72  | -0.696276149 | 0.956 | 0.964 | 2.54E-68  |
| ACSL1         | 6.29E-72  | 1.055528915  | 0.798 | 0.393 | 1.37E-67  |
| PDK4          | 3.02E-71  | -1.365991126 | 0.305 | 0.793 | 6.59E-67  |
| HSP90AB1      | 3.07E-70  | 1.012410793  | 0.954 | 0.834 | 6.69E-66  |
| C15orf48      | 1.30E-67  | 1.452260289  | 0.504 | 0.051 | 2.83E-63  |
| SERPINB1      | 2.90E-67  | 0.993735201  | 0.889 | 0.678 | 6.33E-63  |
| PIM1          | 2.76E-66  | 0.935058565  | 0.616 | 0.143 | 6.03E-62  |
| DNAJB6        | 4.12E-66  | 1.075911902  | 0.828 | 0.486 | 8.98E-62  |
| DNAJB1        | 2.66E-64  | 1.344808503  | 0.884 | 0.597 | 5.80E-60  |
| LMNA          | 4.80E-64  | 1.107090844  | 0.616 | 0.151 | 1.05E-59  |
| ZFAND2A       | 6.65E-64  | 1.38592985   | 0.592 | 0.144 | 1.45E-59  |
| PIM3          | 2.38E-63  | 0.903368097  | 0.588 | 0.136 | 5.19E-59  |
| SLC40A1       | 1.16E-62  | -1.224090597 | 0.62  | 0.892 | 2.54E-58  |
| SNHG15        | 2.36E-59  | 0.861827593  | 0.685 | 0.239 | 5.15E-55  |
| CTSL          | 4.47E-59  | 1.047123     | 0.916 | 0.789 | 9.75E-55  |
| RELB          | 9.81E-59  | 0.746435627  | 0.508 | 0.086 | 2.14E-54  |
| IFNGR1        | 1.06E-58  | -0.83930506  | 0.622 | 0.891 | 2.31E-54  |
| MS4A6A        | 3.72E-58  | -0.557448596 | 0.96  | 0.973 | 8.12E-54  |
| SLC7A5        | 4.30E-58  | 0.723714593  | 0.433 | 0.033 | 9.39E-54  |
| LRG1          | 1.54E-57  | 0.853073282  | 0.418 | 0.03  | 3.36E-53  |
| ABL2          | 3.48E-55  | 0.787780233  | 0.498 | 0.086 | 7.59E-51  |
| SLCO4A1       | 1.34E-54  | 0.731323833  | 0.46  | 0.061 | 2.93E-50  |
| NFKB1         | 1.03E-53  | 0.887358429  | 0.569 | 0.151 | 2.25E-49  |
| IL1RN         | 2.35E-53  | 1.323930493  | 0.58  | 0.161 | 5.12E-49  |
| ATP13A3       | 2.80E-53  | 0.800225294  | 0.521 | 0.109 | 6.10E-49  |
| MIR3945HG     | 5.73E-53  | 0.788456757  | 0.393 | 0.028 | 1.25E-48  |
| RPS29         | 1.04E-52  | 0.551654644  | 0.952 | 0.902 | 2.26E-48  |
| FKBP4         | 1.06E-52  | 0.986397506  | 0.517 | 0.118 | 2.31E-48  |
| TXNIP         | 1.34E-52  | -0.864835758 | 0.504 | 0.847 | 2.93E-48  |
| GIMAP7        | 1.56E-52  | -0.757908422 | 0.061 | 0.488 | 3.40E-48  |
| CPVL          | 4.28E-52  | -0.778497639 | 0.571 | 0.831 | 9.34E-48  |
| DEFA3         | 9.20E-52  | -0.948157883 | 0.036 | 0.449 | 2.01E-47  |
| MAP3K8        | 4.08E-51  | 0.752913347  | 0.866 | 0.587 | 8.91E-47  |
| P2RY13        | 9.09E-51  | -0.812060073 | 0.124 | 0.564 | 1.98E-46  |
| GK            | 1.25E-50  | 0.902056183  | 0.712 | 0.335 | 2.72E-46  |
| DNAJA1        | 2.07E-50  | 0.879610537  | 0.847 | 0.62  | 4.51E-46  |
| NFKB2         | 3.00E-49  | 0.68966694   | 0.466 | 0.088 | 6.54E-45  |
| B4GALT5       | 3.05E-49  | 0.650992239  | 0.445 | 0.068 | 6.65E-45  |
| SELK          | 3.17E-49  | 0.937478827  | 0.788 | 0.476 | 6.91E-45  |
| H3F3B         | 1.31E-48  | 0.500953391  | 0.989 | 0.965 | 2.87E-44  |
| RP11-670E13.6 | 4.45E-48  | 0.90469449   | 0.607 | 0.206 | 9.71E-44  |
| PNRC1         | 6.05E-48  | 0.637599977  | 0.947 | 0.831 | 1.32E-43  |
| TNIP3         | 6.29E-48  | 0.787699515  | 0.328 | 0.01  | 1.37E-43  |
| PELI1         | 7.37E-48  | 0.898658609  | 0.739 | 0.42  | 1.61E-43  |
| PAPSS2        | 4.10E-46  | 0.802037502  | 0.674 | 0.272 | 8.94E-42  |
| THBD          | 6.14E-46  | 0.901071747  | 0.546 | 0.167 | 1.34E-41  |

|               |          |              |       |       |          |
|---------------|----------|--------------|-------|-------|----------|
| C1QB          | 7.40E-46 | -0.503992835 | 0.952 | 0.967 | 1.61E-41 |
| BCL3          | 1.90E-45 | 0.641044386  | 0.492 | 0.114 | 4.15E-41 |
| SAMSN1        | 4.50E-44 | 0.768935614  | 0.868 | 0.642 | 9.82E-40 |
| CACYBP        | 5.45E-44 | 0.89438807   | 0.714 | 0.416 | 1.19E-39 |
| PLSCR1        | 1.20E-43 | 0.742369324  | 0.775 | 0.471 | 2.61E-39 |
| PLAUR         | 3.56E-42 | 0.728065738  | 0.847 | 0.537 | 7.77E-38 |
| FTH1          | 8.97E-42 | 0.429783578  | 1     | 1     | 1.96E-37 |
| HIF1A         | 1.09E-41 | 0.796390983  | 0.752 | 0.441 | 2.38E-37 |
| SLC2A3        | 2.55E-41 | 0.810965322  | 0.628 | 0.255 | 5.56E-37 |
| INSIG1        | 7.46E-41 | 0.939060683  | 0.704 | 0.385 | 1.63E-36 |
| CXCL10        | 1.47E-40 | 1.482197271  | 0.349 | 0.041 | 3.21E-36 |
| B3GNT5        | 5.40E-40 | 0.680584732  | 0.395 | 0.07  | 1.18E-35 |
| IRF1          | 7.57E-40 | 0.745028306  | 0.653 | 0.307 | 1.65E-35 |
| LRRFIP1       | 1.08E-39 | 0.694925859  | 0.811 | 0.589 | 2.36E-35 |
| PTPN1         | 2.61E-39 | 0.651471212  | 0.666 | 0.33  | 5.68E-35 |
| MS4A4A        | 3.30E-39 | -0.572597235 | 0.84  | 0.922 | 7.21E-35 |
| WTAP          | 4.07E-39 | 0.770392704  | 0.632 | 0.325 | 8.87E-35 |
| FOSL2         | 1.58E-38 | 0.660851952  | 0.565 | 0.212 | 3.45E-34 |
| NINJ1         | 2.56E-38 | 0.779361979  | 0.87  | 0.723 | 5.59E-34 |
| UPP1          | 4.57E-38 | 0.687401469  | 0.735 | 0.436 | 9.97E-34 |
| RNASE6        | 5.41E-38 | -0.633954005 | 0.634 | 0.846 | 1.18E-33 |
| CREM          | 7.13E-37 | 0.709585752  | 0.664 | 0.332 | 1.55E-32 |
| EMP1          | 4.59E-36 | 0.752715879  | 0.387 | 0.078 | 1.00E-31 |
| TRIM25        | 4.69E-36 | 0.55187487   | 0.393 | 0.081 | 1.02E-31 |
| CTSS          | 4.80E-36 | -0.431521525 | 0.941 | 0.973 | 1.05E-31 |
| CALM2         | 3.17E-35 | -0.510604406 | 0.834 | 0.925 | 6.92E-31 |
| CD44          | 1.11E-34 | 0.641199521  | 0.836 | 0.632 | 2.43E-30 |
| HBB           | 1.11E-34 | -0.783255589 | 0.12  | 0.459 | 2.43E-30 |
| ARL5B         | 1.46E-34 | 0.744479582  | 0.532 | 0.204 | 3.18E-30 |
| DDX21         | 1.83E-34 | 0.649113206  | 0.691 | 0.416 | 3.99E-30 |
| TWISTNB       | 2.08E-34 | 0.963063057  | 0.481 | 0.174 | 4.54E-30 |
| PFKFB3        | 2.60E-34 | 0.613919707  | 0.622 | 0.297 | 5.68E-30 |
| SDS           | 2.75E-34 | 1.140943978  | 0.433 | 0.121 | 6.00E-30 |
| SPHK1         | 4.23E-34 | 0.4354706    | 0.286 | 0.028 | 9.22E-30 |
| B2M           | 6.81E-34 | -0.302267411 | 1     | 0.997 | 1.48E-29 |
| MAP2K3        | 8.73E-34 | 0.55667401   | 0.588 | 0.259 | 1.90E-29 |
| ARID5A        | 1.44E-33 | 0.645731578  | 0.54  | 0.231 | 3.14E-29 |
| CCRL2         | 1.69E-33 | 0.630197012  | 0.508 | 0.187 | 3.69E-29 |
| SDF2L1        | 2.56E-33 | 0.650535444  | 0.569 | 0.255 | 5.58E-29 |
| GIMAP4        | 3.15E-33 | -0.606563479 | 0.303 | 0.635 | 6.87E-29 |
| MS4A7         | 3.90E-33 | -0.511145348 | 0.887 | 0.934 | 8.51E-29 |
| LDLR          | 5.59E-33 | 0.477847177  | 0.286 | 0.032 | 1.22E-28 |
| SBNO2         | 1.18E-32 | 0.45235291   | 0.315 | 0.046 | 2.58E-28 |
| BCL2A1        | 1.28E-32 | 0.471745037  | 0.815 | 0.493 | 2.79E-28 |
| SEMA6B        | 2.01E-32 | 0.454039181  | 0.244 | 0.013 | 4.39E-28 |
| ADORA3        | 2.11E-32 | -0.499288124 | 0.057 | 0.362 | 4.60E-28 |
| C1orf162      | 2.77E-32 | -0.508608688 | 0.807 | 0.909 | 6.04E-28 |
| FPR1          | 3.10E-32 | 0.626119112  | 0.733 | 0.483 | 6.75E-28 |
| TNFAIP3       | 3.35E-32 | 0.648324832  | 0.79  | 0.458 | 7.30E-28 |
| PDE4B         | 9.67E-32 | 0.57521712   | 0.584 | 0.254 | 2.11E-27 |
| GPR34         | 1.03E-31 | -0.661676267 | 0.376 | 0.667 | 2.25E-27 |
| AZIN1         | 2.20E-31 | 0.588113676  | 0.571 | 0.27  | 4.79E-27 |
| ETS2          | 3.19E-31 | 0.601281287  | 0.813 | 0.645 | 6.96E-27 |
| SAT1          | 4.63E-31 | 0.378861414  | 1     | 1     | 1.01E-26 |
| BIRC3         | 8.86E-31 | 0.632888605  | 0.475 | 0.167 | 1.93E-26 |
| REL           | 1.40E-30 | 0.632699101  | 0.79  | 0.592 | 3.05E-26 |
| RPS27         | 1.94E-30 | 0.313597344  | 0.994 | 0.99  | 4.24E-26 |
| KDM6B         | 2.03E-30 | 0.542490009  | 0.58  | 0.269 | 4.43E-26 |
| LDHA          | 2.05E-30 | 0.612135368  | 0.796 | 0.622 | 4.47E-26 |
| SERPINB9      | 2.22E-30 | 0.611493712  | 0.55  | 0.245 | 4.83E-26 |
| PPP1CB        | 2.23E-30 | 0.609795466  | 0.639 | 0.363 | 4.86E-26 |
| MTHFD2        | 2.63E-30 | 0.614755737  | 0.628 | 0.348 | 5.74E-26 |
| C1QA          | 2.70E-30 | -0.381274821 | 0.958 | 0.968 | 5.88E-26 |
| MRPS6         | 3.15E-30 | 0.644847244  | 0.511 | 0.212 | 6.88E-26 |
| HES4          | 3.43E-30 | 0.480182631  | 0.214 | 0.007 | 7.48E-26 |
| DNAJB9        | 4.45E-30 | 0.60119184   | 0.557 | 0.269 | 9.71E-26 |
| DRAM1         | 4.95E-30 | 0.563939214  | 0.553 | 0.26  | 1.08E-25 |
| PVRL2         | 5.37E-30 | 0.588622471  | 0.542 | 0.25  | 1.17E-25 |
| TCP1          | 5.82E-30 | 0.58682655   | 0.586 | 0.302 | 1.27E-25 |
| RP11-295G20.2 | 6.22E-30 | 0.546294353  | 0.351 | 0.08  | 1.36E-25 |

|           |          |              |       |       |          |
|-----------|----------|--------------|-------|-------|----------|
| NEAT1     | 6.42E-30 | 0.367265496  | 0.979 | 0.967 | 1.40E-25 |
| FOS       | 6.72E-30 | -0.578821217 | 0.943 | 0.975 | 1.46E-25 |
| GIMAP1    | 6.83E-30 | -0.503506978 | 0.174 | 0.489 | 1.49E-25 |
| PTP4A1    | 7.38E-30 | 0.613033692  | 0.59  | 0.299 | 1.61E-25 |
| YBX3      | 7.90E-30 | 0.565996088  | 0.666 | 0.386 | 1.72E-25 |
| RGCC      | 1.99E-29 | 0.643017876  | 0.357 | 0.08  | 4.34E-25 |
| CD163     | 2.59E-29 | -0.393966754 | 0.956 | 0.973 | 5.65E-25 |
| TFRC      | 2.60E-29 | 0.718848659  | 0.437 | 0.151 | 5.66E-25 |
| SDC4      | 2.70E-29 | 0.586807921  | 0.336 | 0.071 | 5.88E-25 |
| FUCA1     | 3.67E-29 | -0.606968746 | 0.288 | 0.594 | 8.00E-25 |
| MXD1      | 4.04E-29 | 0.628240391  | 0.58  | 0.287 | 8.81E-25 |
| AIF1      | 6.67E-29 | -0.366947335 | 0.966 | 0.978 | 1.46E-24 |
| SLC25A37  | 1.71E-28 | 0.655806374  | 0.483 | 0.199 | 3.74E-24 |
| PDE4DIP   | 1.76E-28 | 0.464472543  | 0.464 | 0.174 | 3.83E-24 |
| HSPA1B    | 1.77E-28 | 0.929478928  | 0.79  | 0.534 | 3.86E-24 |
| P4HA1     | 2.11E-28 | 0.572541758  | 0.532 | 0.252 | 4.60E-24 |
| LIMK2     | 2.76E-28 | 0.422175255  | 0.256 | 0.032 | 6.01E-24 |
| PPIF      | 3.05E-28 | 0.540485574  | 0.517 | 0.217 | 6.66E-24 |
| ZFP36L1   | 3.16E-28 | -0.496248239 | 0.752 | 0.922 | 6.90E-24 |
| TAOK3     | 3.39E-28 | 0.620431633  | 0.666 | 0.41  | 7.40E-24 |
| PHLDA2    | 6.99E-28 | 0.58659101   | 0.38  | 0.108 | 1.52E-23 |
| CHMP1B    | 2.05E-27 | 0.678503877  | 0.754 | 0.499 | 4.47E-23 |
| DDIT3     | 2.09E-27 | 0.560049004  | 0.605 | 0.322 | 4.56E-23 |
| VAMP8     | 3.30E-27 | -0.419531541 | 0.828 | 0.905 | 7.21E-23 |
| KLHL6     | 3.41E-27 | 0.418409569  | 0.324 | 0.071 | 7.43E-23 |
| WBP5      | 3.86E-27 | 0.54019574   | 0.269 | 0.043 | 8.42E-23 |
| PNP       | 5.85E-27 | 0.630471693  | 0.534 | 0.255 | 1.28E-22 |
| DSE       | 8.27E-27 | 0.573574407  | 0.586 | 0.325 | 1.80E-22 |
| XBP1      | 1.12E-26 | 0.564433305  | 0.748 | 0.534 | 2.45E-22 |
| MIDN      | 1.17E-26 | 0.495123602  | 0.632 | 0.338 | 2.54E-22 |
| ELL2      | 1.33E-26 | 0.597151837  | 0.597 | 0.323 | 2.90E-22 |
| TNFRSF10D | 1.54E-26 | 0.465283707  | 0.334 | 0.078 | 3.36E-22 |
| VSIG4     | 2.44E-26 | -0.530232277 | 0.761 | 0.856 | 5.31E-22 |
| APBB1IP   | 2.80E-26 | -0.482902328 | 0.468 | 0.715 | 6.10E-22 |
| CSF1R     | 3.04E-26 | -0.477558906 | 0.725 | 0.841 | 6.63E-22 |
| CST3      | 3.23E-26 | -0.333202153 | 0.996 | 0.998 | 7.05E-22 |
| ARRDC3    | 6.20E-26 | 0.507050092  | 0.546 | 0.26  | 1.35E-21 |
| EREG      | 8.44E-26 | 0.525222972  | 0.389 | 0.108 | 1.84E-21 |
| EMP3      | 9.50E-26 | 0.5368102    | 0.872 | 0.765 | 2.07E-21 |
| TXN       | 9.65E-26 | 0.809030271  | 0.805 | 0.67  | 2.10E-21 |
| ARHGDIB   | 1.01E-25 | -0.411157939 | 0.792 | 0.867 | 2.21E-21 |
| C5AR1     | 1.01E-25 | 0.512681489  | 0.882 | 0.68  | 2.21E-21 |
| CD55      | 1.23E-25 | 0.557704703  | 0.788 | 0.612 | 2.68E-21 |
| RPS21     | 1.43E-25 | 0.265409622  | 0.981 | 0.973 | 3.12E-21 |
| HSP90B1   | 1.63E-25 | 0.532103528  | 0.905 | 0.789 | 3.55E-21 |
| WASF2     | 1.71E-25 | -0.481237533 | 0.353 | 0.642 | 3.72E-21 |
| CD74      | 2.34E-25 | -0.280287698 | 0.996 | 0.998 | 5.11E-21 |
| EZR       | 2.79E-25 | 0.617621526  | 0.576 | 0.323 | 6.07E-21 |
| EAF1      | 3.06E-25 | 0.439647443  | 0.336 | 0.09  | 6.67E-21 |
| STIP1     | 8.04E-25 | 0.463439359  | 0.416 | 0.163 | 1.75E-20 |
| UGCG      | 8.41E-25 | 0.509530104  | 0.403 | 0.144 | 1.83E-20 |
| MCTP2     | 8.61E-25 | 0.34744357   | 0.216 | 0.022 | 1.88E-20 |
| NPC2      | 1.45E-24 | -0.278039418 | 0.975 | 0.982 | 3.16E-20 |
| RAB27A    | 1.53E-24 | 0.384954881  | 0.239 | 0.035 | 3.33E-20 |
| ODF3B     | 2.09E-24 | 0.481413333  | 0.523 | 0.252 | 4.56E-20 |
| MYADM     | 2.27E-24 | 0.537626027  | 0.576 | 0.305 | 4.96E-20 |
| HSPA8     | 2.50E-24 | 0.632721329  | 0.903 | 0.859 | 5.45E-20 |
| FGD2      | 2.56E-24 | -0.512783956 | 0.34  | 0.622 | 5.58E-20 |
| RNF144B   | 3.58E-24 | 0.538113506  | 0.723 | 0.479 | 7.81E-20 |
| NFIL3     | 4.24E-24 | 0.428465944  | 0.319 | 0.081 | 9.25E-20 |
| GLIPR1    | 5.08E-24 | -0.439809843 | 0.55  | 0.76  | 1.11E-19 |
| PTPN2     | 5.97E-24 | 0.505099663  | 0.618 | 0.367 | 1.30E-19 |
| PPP1R15A  | 6.56E-24 | 0.388756609  | 0.891 | 0.655 | 1.43E-19 |
| TOM1      | 7.09E-24 | 0.459234733  | 0.439 | 0.181 | 1.55E-19 |
| DNAJB11   | 1.03E-23 | 0.494661782  | 0.506 | 0.25  | 2.24E-19 |
| TNFAIP8L2 | 1.79E-23 | -0.300664062 | 0.034 | 0.26  | 3.91E-19 |
| RPL39     | 2.02E-23 | 0.256487809  | 0.998 | 0.995 | 4.41E-19 |
| HLA-DPA1  | 2.36E-23 | -0.338440199 | 0.96  | 0.978 | 5.15E-19 |
| HAMP      | 2.39E-23 | 0.931652289  | 0.179 | 0.01  | 5.21E-19 |
| AHSA1     | 2.79E-23 | 0.516862082  | 0.443 | 0.201 | 6.09E-19 |

|              |          |              |       |       |          |
|--------------|----------|--------------|-------|-------|----------|
| STAT3        | 3.18E-23 | 0.485265864  | 0.611 | 0.365 | 6.93E-19 |
| ZFP36L2      | 3.66E-23 | -0.502479041 | 0.601 | 0.829 | 7.97E-19 |
| NUDC         | 3.85E-23 | 0.518361163  | 0.569 | 0.332 | 8.40E-19 |
| SLAMF1       | 5.44E-23 | 0.394764654  | 0.151 | 0     | 1.19E-18 |
| VEGFA        | 5.95E-23 | 0.400018339  | 0.288 | 0.065 | 1.30E-18 |
| NAPA         | 6.40E-23 | 0.563428122  | 0.666 | 0.439 | 1.40E-18 |
| OTUD1        | 9.84E-23 | 0.468606987  | 0.393 | 0.144 | 2.15E-18 |
| SAMHD1       | 1.17E-22 | -0.457790438 | 0.519 | 0.751 | 2.56E-18 |
| ATF3         | 1.35E-22 | 0.402812791  | 0.695 | 0.4   | 2.93E-18 |
| ANXA1        | 1.38E-22 | 0.715005614  | 0.769 | 0.539 | 3.02E-18 |
| SLC16A10     | 1.44E-22 | 0.351517627  | 0.174 | 0.01  | 3.15E-18 |
| CHSY1        | 2.51E-22 | 0.340491916  | 0.271 | 0.06  | 5.47E-18 |
| FFAR3        | 2.61E-22 | 0.418139016  | 0.183 | 0.013 | 5.68E-18 |
| MRPL18       | 2.61E-22 | 0.590313972  | 0.489 | 0.254 | 5.70E-18 |
| MAFF         | 3.55E-22 | 0.48319715   | 0.378 | 0.136 | 7.73E-18 |
| OLR1         | 5.28E-22 | 0.627858209  | 0.258 | 0.056 | 1.15E-17 |
| ATP2A2       | 5.82E-22 | 0.478661722  | 0.487 | 0.237 | 1.27E-17 |
| FCGR3A       | 6.82E-22 | -0.390964971 | 0.847 | 0.891 | 1.49E-17 |
| STAT4        | 9.76E-22 | 0.317054027  | 0.183 | 0.017 | 2.13E-17 |
| CREB5        | 9.98E-22 | 0.407941682  | 0.273 | 0.061 | 2.18E-17 |
| MCL1         | 1.26E-21 | 0.328270863  | 0.929 | 0.766 | 2.74E-17 |
| DUSP2        | 1.30E-21 | 0.483751046  | 0.616 | 0.32  | 2.84E-17 |
| HERPUD1      | 1.34E-21 | 0.451996952  | 0.882 | 0.781 | 2.93E-17 |
| GNA13        | 1.48E-21 | 0.433819305  | 0.529 | 0.28  | 3.23E-17 |
| FAM107B      | 1.51E-21 | 0.39701824   | 0.33  | 0.103 | 3.29E-17 |
| EIF4A1       | 1.61E-21 | 0.436489546  | 0.742 | 0.559 | 3.51E-17 |
| CALR         | 1.88E-21 | 0.434289844  | 0.84  | 0.73  | 4.09E-17 |
| ATM          | 1.99E-21 | -0.417024908 | 0.195 | 0.474 | 4.35E-17 |
| METRNL       | 2.98E-21 | 0.410122506  | 0.317 | 0.095 | 6.51E-17 |
| RNASET2      | 3.42E-21 | -0.315377825 | 0.916 | 0.952 | 7.47E-17 |
| VIM          | 3.63E-21 | 0.35084104   | 0.983 | 0.965 | 7.92E-17 |
| CH25H        | 3.79E-21 | 0.717780029  | 0.181 | 0.017 | 8.26E-17 |
| ATP1B3       | 5.20E-21 | 0.687803459  | 0.687 | 0.512 | 1.13E-16 |
| HMG3         | 6.66E-21 | -0.445735364 | 0.353 | 0.619 | 1.45E-16 |
| MTHFR        | 6.84E-21 | 0.441873136  | 0.431 | 0.191 | 1.49E-16 |
| MIR155HG     | 6.85E-21 | 0.658461337  | 0.252 | 0.055 | 1.49E-16 |
| EIF2AK3      | 9.42E-21 | 0.391999102  | 0.286 | 0.08  | 2.06E-16 |
| NDRG1        | 1.04E-20 | 0.418829946  | 0.336 | 0.114 | 2.26E-16 |
| EHD1         | 1.04E-20 | 0.408694335  | 0.353 | 0.126 | 2.27E-16 |
| TMSB10       | 1.12E-20 | -0.250716556 | 0.998 | 0.995 | 2.45E-16 |
| LACTB        | 1.15E-20 | 0.409758446  | 0.418 | 0.182 | 2.51E-16 |
| GPR65        | 1.62E-20 | -0.426704406 | 0.382 | 0.643 | 3.54E-16 |
| GABARAP      | 2.02E-20 | -0.273300483 | 0.956 | 0.964 | 4.41E-16 |
| MAP2K1       | 2.27E-20 | 0.496015709  | 0.544 | 0.305 | 4.94E-16 |
| TEL1-TNFRSF6 | 2.40E-20 | 0.35048627   | 0.147 | 0.005 | 5.23E-16 |
| ITM2B        | 2.88E-20 | -0.270758904 | 0.981 | 0.972 | 6.28E-16 |
| UQCRL10      | 3.41E-20 | -0.430225733 | 0.641 | 0.801 | 7.44E-16 |
| ARPC1B       | 5.18E-20 | -0.343240585 | 0.815 | 0.877 | 1.13E-15 |
| DNMBP        | 5.31E-20 | 0.341255996  | 0.212 | 0.036 | 1.16E-15 |
| TMEM37       | 5.48E-20 | -0.404021263 | 0.244 | 0.511 | 1.20E-15 |
| ADGRE2       | 5.51E-20 | 0.520576703  | 0.601 | 0.393 | 1.20E-15 |
| HNRNPC       | 5.83E-20 | 0.3769826    | 0.8   | 0.607 | 1.27E-15 |
| CCNL1        | 6.18E-20 | 0.463593394  | 0.779 | 0.59  | 1.35E-15 |
| SCIMP        | 6.46E-20 | -0.423324453 | 0.275 | 0.536 | 1.41E-15 |
| TM9SF2       | 6.59E-20 | -0.447305    | 0.351 | 0.61  | 1.44E-15 |
| BHLHE40      | 7.60E-20 | 0.437023729  | 0.613 | 0.386 | 1.66E-15 |
| RYBP         | 9.16E-20 | 0.444252096  | 0.324 | 0.108 | 2.00E-15 |
| PLIN2        | 1.09E-19 | 0.641762327  | 0.767 | 0.612 | 2.38E-15 |
| LPAR6        | 1.32E-19 | -0.386809781 | 0.111 | 0.348 | 2.88E-15 |
| LCP2         | 1.74E-19 | 0.480523883  | 0.815 | 0.69  | 3.80E-15 |
| GLUL         | 1.92E-19 | 0.455241692  | 0.945 | 0.902 | 4.18E-15 |
| CTSZ         | 2.24E-19 | 0.495757211  | 0.739 | 0.575 | 4.88E-15 |
| RPL36A       | 2.30E-19 | 0.365020253  | 0.914 | 0.854 | 5.01E-15 |
| CD83         | 2.80E-19 | 0.434292066  | 0.836 | 0.577 | 6.11E-15 |
| FOLR2        | 2.92E-19 | -0.490169891 | 0.739 | 0.862 | 6.37E-15 |
| HLA-DRB5     | 3.03E-19 | -0.279356166 | 0.979 | 0.985 | 6.62E-15 |
| FAM26F       | 4.09E-19 | -0.370621537 | 0.714 | 0.844 | 8.92E-15 |
| PLK3         | 4.16E-19 | 0.372243094  | 0.37  | 0.143 | 9.07E-15 |
| RPL37A       | 4.40E-19 | 0.271091898  | 0.971 | 0.967 | 9.59E-15 |
| MT1A         | 4.54E-19 | 0.672104054  | 0.139 | 0.005 | 9.90E-15 |

|             |          |              |       |       |          |
|-------------|----------|--------------|-------|-------|----------|
| HSPA6       | 5.85E-19 | 1.225774648  | 0.464 | 0.26  | 1.27E-14 |
| RBX1        | 6.11E-19 | -0.358557382 | 0.33  | 0.579 | 1.33E-14 |
| HCLS1       | 6.95E-19 | -0.327300977 | 0.874 | 0.91  | 1.52E-14 |
| LIPA        | 8.09E-19 | -0.474686865 | 0.889 | 0.922 | 1.76E-14 |
| RPS2        | 9.15E-19 | 0.300319585  | 0.96  | 0.937 | 2.00E-14 |
| TNFSF10     | 9.87E-19 | -0.354246058 | 0.116 | 0.352 | 2.15E-14 |
| GPR84       | 1.10E-18 | 0.265322152  | 0.168 | 0.018 | 2.40E-14 |
| GRN         | 1.23E-18 | -0.376815641 | 0.874 | 0.899 | 2.68E-14 |
| JUND        | 1.36E-18 | 0.462637073  | 0.704 | 0.469 | 2.96E-14 |
| TIMP1       | 1.47E-18 | 0.675835437  | 0.918 | 0.877 | 3.21E-14 |
| IGSF6       | 1.67E-18 | -0.440926041 | 0.693 | 0.842 | 3.63E-14 |
| PDE4A       | 1.74E-18 | 0.340163062  | 0.261 | 0.071 | 3.79E-14 |
| NFE2L2      | 1.97E-18 | 0.440525441  | 0.721 | 0.559 | 4.30E-14 |
| CXCR4       | 2.15E-18 | -0.553234956 | 0.498 | 0.705 | 4.68E-14 |
| N4BP2L2     | 2.32E-18 | -0.430710742 | 0.357 | 0.619 | 5.07E-14 |
| SULT1A1     | 2.81E-18 | -0.423212799 | 0.41  | 0.643 | 6.12E-14 |
| PAPD5       | 3.00E-18 | 0.387398713  | 0.29  | 0.093 | 6.54E-14 |
| HHEX        | 3.01E-18 | -0.312631622 | 0.057 | 0.257 | 6.56E-14 |
| ZC3HAV1     | 3.22E-18 | 0.483067637  | 0.477 | 0.254 | 7.02E-14 |
| DNTTIP2     | 4.22E-18 | 0.428466987  | 0.422 | 0.206 | 9.20E-14 |
| ZC3H12A     | 4.29E-18 | 0.388923296  | 0.357 | 0.139 | 9.36E-14 |
| LMNB1       | 4.40E-18 | 0.26552971   | 0.214 | 0.043 | 9.59E-14 |
| RASGEF1B    | 4.46E-18 | 0.397412171  | 0.584 | 0.358 | 9.72E-14 |
| FPR2        | 5.43E-18 | 0.386839604  | 0.286 | 0.091 | 1.19E-13 |
| CLIC4       | 5.82E-18 | 0.357161952  | 0.351 | 0.139 | 1.27E-13 |
| CTSC        | 6.30E-18 | -0.38297198  | 0.838 | 0.919 | 1.37E-13 |
| ELMSAN1     | 8.04E-18 | 0.451258108  | 0.353 | 0.148 | 1.75E-13 |
| CITED2      | 8.47E-18 | -0.602767613 | 0.462 | 0.673 | 1.85E-13 |
| MALAT1      | 9.16E-18 | 0.273188824  | 0.985 | 0.988 | 2.00E-13 |
| PHACTR1     | 1.03E-17 | 0.401680781  | 0.481 | 0.242 | 2.25E-13 |
| DNAAF1      | 1.06E-17 | 0.319153493  | 0.134 | 0.007 | 2.31E-13 |
| SH3BP5      | 1.11E-17 | 0.441152398  | 0.542 | 0.325 | 2.43E-13 |
| TNFAIP6     | 1.16E-17 | 0.396036401  | 0.206 | 0.04  | 2.53E-13 |
| PPARD       | 1.23E-17 | 0.271925934  | 0.227 | 0.053 | 2.68E-13 |
| LIMD2       | 1.32E-17 | -0.39375396  | 0.504 | 0.701 | 2.88E-13 |
| ITGB2       | 1.32E-17 | -0.353221849 | 0.765 | 0.867 | 2.89E-13 |
| RALGDS      | 1.42E-17 | 0.364689093  | 0.269 | 0.083 | 3.09E-13 |
| MT1X        | 1.98E-17 | 0.950202265  | 0.513 | 0.295 | 4.32E-13 |
| APOBEC3A    | 2.01E-17 | 0.400076551  | 0.164 | 0.02  | 4.39E-13 |
| PTPRC       | 2.23E-17 | -0.342553263 | 0.798 | 0.891 | 4.87E-13 |
| FEM1C       | 2.76E-17 | 0.339364177  | 0.292 | 0.098 | 6.03E-13 |
| CD274       | 2.93E-17 | 0.258898809  | 0.147 | 0.013 | 6.39E-13 |
| MIR4435-2HG | 2.99E-17 | 0.424281053  | 0.38  | 0.166 | 6.53E-13 |
| CCL18       | 3.31E-17 | 0.824805046  | 0.139 | 0.01  | 7.22E-13 |
| RNF146      | 3.31E-17 | -0.275519    | 0.145 | 0.386 | 7.22E-13 |
| SQSTM1      | 3.37E-17 | 0.406717535  | 0.826 | 0.72  | 7.35E-13 |
| MANF        | 3.85E-17 | 0.399325984  | 0.408 | 0.192 | 8.39E-13 |
| OPTN        | 4.04E-17 | 0.264611851  | 0.145 | 0.013 | 8.82E-13 |
| MORF4L2     | 4.38E-17 | 0.408825336  | 0.454 | 0.232 | 9.55E-13 |
| IRAK2       | 5.09E-17 | 0.275968153  | 0.185 | 0.033 | 1.11E-12 |
| ELOVL5      | 5.17E-17 | 0.402626403  | 0.454 | 0.244 | 1.13E-12 |
| ABI3        | 6.04E-17 | -0.397850329 | 0.275 | 0.509 | 1.32E-12 |
| BTG3        | 6.37E-17 | 0.286639231  | 0.267 | 0.081 | 1.39E-12 |
| NOTCH1      | 7.17E-17 | 0.280480829  | 0.17  | 0.025 | 1.56E-12 |
| UBE2B       | 7.20E-17 | 0.45457524   | 0.708 | 0.566 | 1.57E-12 |
| KIAA1551    | 8.31E-17 | -0.30441701  | 0.09  | 0.3   | 1.81E-12 |
| FCGR2A      | 8.54E-17 | 0.493253323  | 0.59  | 0.401 | 1.86E-12 |
| SLC8B1      | 9.84E-17 | 0.378800472  | 0.414 | 0.201 | 2.14E-12 |
| CLEC12A     | 9.88E-17 | -0.384298021 | 0.273 | 0.514 | 2.15E-12 |
| SLC2A6      | 1.17E-16 | 0.273233244  | 0.2   | 0.041 | 2.55E-12 |
| MT-ND5      | 1.30E-16 | -0.358905569 | 0.975 | 0.987 | 2.84E-12 |
| SOCS1       | 1.35E-16 | 0.29025969   | 0.244 | 0.068 | 2.94E-12 |
| SAV1        | 1.49E-16 | 0.343687974  | 0.235 | 0.065 | 3.24E-12 |
| FABP5       | 1.52E-16 | 0.595891876  | 0.758 | 0.604 | 3.32E-12 |
| SCAMP2      | 2.08E-16 | -0.349739281 | 0.313 | 0.549 | 4.53E-12 |
| NRP2        | 2.36E-16 | 0.360602284  | 0.261 | 0.083 | 5.15E-12 |
| ABCA1       | 2.56E-16 | 0.381615367  | 0.769 | 0.599 | 5.59E-12 |
| REEP5       | 2.78E-16 | -0.352685809 | 0.45  | 0.673 | 6.07E-12 |
| FAM49A      | 2.95E-16 | 0.409184936  | 0.603 | 0.41  | 6.44E-12 |
| C10orf54    | 2.96E-16 | -0.361237968 | 0.672 | 0.823 | 6.45E-12 |



|          |          |              |       |       |          |
|----------|----------|--------------|-------|-------|----------|
| ABRACL   | 3.03E-16 | -0.377675921 | 0.58  | 0.761 | 6.61E-12 |
| CMKLR1   | 3.10E-16 | -0.29936917  | 0.097 | 0.307 | 6.77E-12 |
| PHLDA1   | 4.06E-16 | 0.450115212  | 0.223 | 0.058 | 8.86E-12 |
| BLVRB    | 4.18E-16 | -0.309242979 | 0.855 | 0.924 | 9.11E-12 |
| HIVEP1   | 4.81E-16 | 0.326677598  | 0.233 | 0.066 | 1.05E-11 |
| RRAGC    | 5.25E-16 | 0.336980899  | 0.313 | 0.121 | 1.15E-11 |
| TNFSF13  | 6.04E-16 | -0.367011475 | 0.277 | 0.506 | 1.32E-11 |
| IER2     | 6.47E-16 | -0.49075415  | 0.836 | 0.892 | 1.41E-11 |
| RGS19    | 6.64E-16 | -0.339218337 | 0.271 | 0.504 | 1.45E-11 |
| LRP1     | 7.48E-16 | -0.358885953 | 0.336 | 0.567 | 1.63E-11 |
| CD33     | 7.66E-16 | -0.367758878 | 0.338 | 0.572 | 1.67E-11 |
| PTGES3   | 8.37E-16 | 0.496999114  | 0.824 | 0.73  | 1.83E-11 |
| FAM102B  | 9.83E-16 | 0.347388539  | 0.273 | 0.095 | 2.14E-11 |
| HVCN1    | 1.09E-15 | -0.342313407 | 0.181 | 0.405 | 2.38E-11 |
| ARPC5    | 1.15E-15 | -0.345925893 | 0.782 | 0.857 | 2.50E-11 |
| GMFG     | 1.20E-15 | -0.352760138 | 0.59  | 0.748 | 2.63E-11 |
| DNAJC25  | 1.24E-15 | 0.25203004   | 0.189 | 0.04  | 2.70E-11 |
| TUBA1C   | 1.29E-15 | 0.42825593   | 0.513 | 0.318 | 2.81E-11 |
| WARS     | 1.98E-15 | 0.423641675  | 0.412 | 0.217 | 4.32E-11 |
| CPM      | 2.18E-15 | -0.410906909 | 0.689 | 0.804 | 4.76E-11 |
| FRMD4B   | 2.36E-15 | -0.382146588 | 0.357 | 0.584 | 5.14E-11 |
| IRF2     | 2.40E-15 | -0.352364223 | 0.216 | 0.436 | 5.23E-11 |
| SERPINH1 | 2.50E-15 | 0.383244736  | 0.151 | 0.022 | 5.45E-11 |
| TBXAS1   | 2.55E-15 | -0.317721534 | 0.662 | 0.828 | 5.55E-11 |
| GPCPD1   | 2.58E-15 | 0.450634566  | 0.578 | 0.413 | 5.62E-11 |
| AQP9     | 3.06E-15 | 0.349229659  | 0.197 | 0.045 | 6.68E-11 |
| SLC38A10 | 3.26E-15 | -0.319996976 | 0.13  | 0.34  | 7.11E-11 |
| MERTK    | 3.36E-15 | -0.378354638 | 0.441 | 0.645 | 7.33E-11 |
| SHFM1    | 3.43E-15 | -0.367944132 | 0.468 | 0.687 | 7.49E-11 |
| CSRNP1   | 3.89E-15 | 0.376444884  | 0.504 | 0.29  | 8.48E-11 |
| BAZ1A    | 4.19E-15 | 0.458669997  | 0.605 | 0.441 | 9.14E-11 |
| MBOAT7   | 5.26E-15 | 0.338644235  | 0.286 | 0.111 | 1.15E-10 |
| SPIC     | 5.34E-15 | -0.504702629 | 0.17  | 0.381 | 1.17E-10 |
| GPX1     | 5.58E-15 | 0.299416983  | 0.952 | 0.925 | 1.22E-10 |
| IL4R     | 6.02E-15 | 0.34032531   | 0.313 | 0.126 | 1.31E-10 |
| ARL4C    | 8.49E-15 | 0.47710173   | 0.471 | 0.272 | 1.85E-10 |
| RAB5A    | 9.50E-15 | 0.330375247  | 0.471 | 0.267 | 2.07E-10 |
| EIF5     | 1.03E-14 | 0.356275988  | 0.758 | 0.63  | 2.25E-10 |
| STX10    | 1.18E-14 | -0.299202136 | 0.185 | 0.408 | 2.58E-10 |
| SESN1    | 1.22E-14 | -0.327017897 | 0.179 | 0.398 | 2.67E-10 |
| RNF13    | 1.23E-14 | -0.33390033  | 0.62  | 0.769 | 2.67E-10 |
| CD68     | 1.60E-14 | -0.250183924 | 0.975 | 0.96  | 3.50E-10 |
| GSTK1    | 1.73E-14 | -0.330907572 | 0.674 | 0.813 | 3.77E-10 |
| ADGRE5   | 2.02E-14 | 0.480767852  | 0.632 | 0.484 | 4.40E-10 |
| GPBP1    | 2.20E-14 | 0.382255499  | 0.618 | 0.453 | 4.79E-10 |
| SYAP1    | 2.42E-14 | 0.418413034  | 0.502 | 0.305 | 5.27E-10 |
| MS4A4E   | 2.50E-14 | -0.36967788  | 0.162 | 0.363 | 5.45E-10 |
| FLT1     | 2.55E-14 | 0.271238345  | 0.145 | 0.022 | 5.57E-10 |
| MT1E     | 3.22E-14 | 0.893322603  | 0.296 | 0.124 | 7.03E-10 |
| DUSP1    | 3.41E-14 | -0.341852766 | 0.979 | 0.965 | 7.44E-10 |
| TRAPPC1  | 4.14E-14 | -0.374023237 | 0.357 | 0.566 | 9.03E-10 |
| TMEM2    | 4.42E-14 | 0.340384616  | 0.412 | 0.209 | 9.63E-10 |
| IRF5     | 4.97E-14 | -0.282668887 | 0.118 | 0.317 | 1.08E-09 |
| SNN      | 5.17E-14 | 0.313359127  | 0.315 | 0.138 | 1.13E-09 |
| ZBTB43   | 5.58E-14 | 0.312560327  | 0.254 | 0.093 | 1.22E-09 |
| GCNT1    | 5.94E-14 | -0.253492164 | 0.084 | 0.265 | 1.29E-09 |
| TRIP10   | 6.68E-14 | 0.261971548  | 0.166 | 0.035 | 1.46E-09 |
| P2RY12   | 7.42E-14 | -0.25321016  | 0.082 | 0.259 | 1.62E-09 |
| GBP2     | 7.52E-14 | 0.404312902  | 0.494 | 0.303 | 1.64E-09 |
| MYO1G    | 8.77E-14 | 0.323898159  | 0.351 | 0.166 | 1.91E-09 |
| HYOU1    | 9.00E-14 | 0.275818938  | 0.229 | 0.075 | 1.96E-09 |
| FAM105A  | 9.02E-14 | -0.262005338 | 0.13  | 0.33  | 1.97E-09 |
| SCP2     | 9.32E-14 | -0.343984866 | 0.401 | 0.605 | 2.03E-09 |
| ADRB2    | 9.93E-14 | -0.257863426 | 0.082 | 0.257 | 2.17E-09 |
| MAPK6    | 9.98E-14 | 0.324715981  | 0.332 | 0.154 | 2.18E-09 |
| ORMDL1   | 1.04E-13 | -0.341802946 | 0.351 | 0.559 | 2.26E-09 |
| MMP19    | 1.06E-13 | 0.715832327  | 0.45  | 0.262 | 2.32E-09 |
| C16orf72 | 1.18E-13 | 0.307113053  | 0.355 | 0.171 | 2.58E-09 |
| RCS1     | 1.21E-13 | -0.323019016 | 0.317 | 0.544 | 2.65E-09 |
| WSB1     | 1.28E-13 | -0.378108368 | 0.832 | 0.904 | 2.79E-09 |

|          |          |              |       |       |          |
|----------|----------|--------------|-------|-------|----------|
| LAP3     | 1.33E-13 | 0.3461194    | 0.637 | 0.494 | 2.91E-09 |
| MIS18BP1 | 1.36E-13 | -0.320465369 | 0.204 | 0.415 | 2.97E-09 |
| IFI30    | 1.47E-13 | 0.361883643  | 0.756 | 0.645 | 3.20E-09 |
| ARPC3    | 1.50E-13 | -0.267472802 | 0.943 | 0.959 | 3.27E-09 |
| YPEL2    | 1.59E-13 | -0.267328997 | 0.111 | 0.302 | 3.48E-09 |
| PSMB10   | 1.60E-13 | -0.28270593  | 0.292 | 0.511 | 3.49E-09 |
| FAM177A1 | 1.61E-13 | 0.35090699   | 0.435 | 0.25  | 3.52E-09 |
| FNIP2    | 1.62E-13 | 0.42553048   | 0.473 | 0.302 | 3.52E-09 |
| ACP2     | 1.65E-13 | -0.279159411 | 0.252 | 0.481 | 3.60E-09 |
| AKR1A1   | 1.72E-13 | -0.334537841 | 0.414 | 0.612 | 3.74E-09 |
| BACH1    | 1.82E-13 | 0.356816582  | 0.489 | 0.3   | 3.96E-09 |
| KLF4     | 1.82E-13 | 0.316916426  | 0.866 | 0.746 | 3.97E-09 |
| FRMD4A   | 2.17E-13 | -0.320700831 | 0.126 | 0.313 | 4.73E-09 |
| GADD45B  | 2.19E-13 | 0.339025725  | 0.964 | 0.891 | 4.78E-09 |
| POLD4    | 2.28E-13 | -0.32578794  | 0.359 | 0.561 | 4.98E-09 |
| ISG20    | 2.33E-13 | 0.373836476  | 0.313 | 0.141 | 5.09E-09 |
| SLCO2B1  | 2.52E-13 | -0.333643143 | 0.311 | 0.526 | 5.50E-09 |
| TMEM70   | 2.55E-13 | 0.376226287  | 0.441 | 0.27  | 5.56E-09 |
| PYCARD   | 2.79E-13 | -0.306584957 | 0.721 | 0.816 | 6.08E-09 |
| STX11    | 2.90E-13 | 0.328852838  | 0.603 | 0.423 | 6.33E-09 |
| PPT1     | 3.04E-13 | -0.366346196 | 0.59  | 0.738 | 6.62E-09 |
| GBP1     | 3.31E-13 | 0.326321761  | 0.269 | 0.108 | 7.21E-09 |
| TSPAN4   | 3.58E-13 | -0.322889426 | 0.571 | 0.73  | 7.81E-09 |
| METTL7A  | 3.83E-13 | -0.345688159 | 0.372 | 0.58  | 8.35E-09 |
| PPTC7    | 3.87E-13 | 0.262119549  | 0.216 | 0.07  | 8.45E-09 |
| NDUFA12  | 4.71E-13 | -0.271195237 | 0.307 | 0.526 | 1.03E-08 |
| PTX3     | 4.97E-13 | 0.467679187  | 0.16  | 0.035 | 1.08E-08 |
| MAP1LC3B | 5.61E-13 | 0.341596137  | 0.739 | 0.597 | 1.22E-08 |
| IL10RA   | 5.68E-13 | -0.315222567 | 0.473 | 0.667 | 1.24E-08 |
| PTPN6    | 5.80E-13 | -0.311754467 | 0.471 | 0.66  | 1.26E-08 |
| C3AR1    | 5.84E-13 | -0.322318195 | 0.368 | 0.577 | 1.27E-08 |
| SLC3A2   | 6.10E-13 | 0.36798881   | 0.674 | 0.531 | 1.33E-08 |
| ACBD3    | 6.87E-13 | 0.255559547  | 0.223 | 0.075 | 1.50E-08 |
| TPM4     | 7.25E-13 | 0.377438911  | 0.525 | 0.355 | 1.58E-08 |
| EVI2B    | 7.46E-13 | -0.336608162 | 0.683 | 0.809 | 1.63E-08 |
| RANGAP1  | 7.86E-13 | 0.275017315  | 0.197 | 0.058 | 1.71E-08 |
| AGO2     | 8.22E-13 | 0.302776925  | 0.256 | 0.1   | 1.79E-08 |
| ATG16L2  | 8.46E-13 | -0.381737657 | 0.33  | 0.536 | 1.85E-08 |
| VIMP     | 9.23E-13 | 0.378256668  | 0.534 | 0.367 | 2.01E-08 |
| GIMAP2   | 1.02E-12 | -0.287525712 | 0.195 | 0.395 | 2.22E-08 |
| DUSP6    | 1.02E-12 | -0.411856893 | 0.42  | 0.622 | 2.22E-08 |
| GNPDA1   | 1.03E-12 | -0.301299809 | 0.248 | 0.466 | 2.25E-08 |
| ZFP36    | 1.12E-12 | 0.29834875   | 0.966 | 0.932 | 2.44E-08 |
| RIPK2    | 1.12E-12 | 0.35115741   | 0.41  | 0.234 | 2.44E-08 |
| IFT57    | 1.24E-12 | 0.252375184  | 0.17  | 0.043 | 2.70E-08 |
| EPN1     | 1.24E-12 | -0.320479536 | 0.361 | 0.551 | 2.71E-08 |
| SRP9     | 1.53E-12 | -0.322975159 | 0.34  | 0.529 | 3.34E-08 |
| RAPGEF2  | 1.56E-12 | 0.286820084  | 0.284 | 0.124 | 3.39E-08 |
| HSPA4    | 1.65E-12 | 0.426836266  | 0.441 | 0.282 | 3.59E-08 |
| COX6C    | 1.76E-12 | -0.266155548 | 0.794 | 0.887 | 3.83E-08 |
| BTF3L4   | 1.85E-12 | -0.28906821  | 0.357 | 0.57  | 4.04E-08 |
| CORO1A   | 1.93E-12 | -0.349462286 | 0.534 | 0.697 | 4.21E-08 |
| GIMAP5   | 1.98E-12 | -0.260482536 | 0.16  | 0.357 | 4.32E-08 |
| LSM7     | 2.91E-12 | -0.294113366 | 0.342 | 0.539 | 6.35E-08 |
| ARFGAP3  | 2.92E-12 | 0.278238086  | 0.34  | 0.171 | 6.37E-08 |
| TCF7L2   | 3.01E-12 | -0.382972007 | 0.284 | 0.479 | 6.56E-08 |
| NAA20    | 3.04E-12 | -0.325352251 | 0.206 | 0.396 | 6.63E-08 |
| NDUFA2   | 3.93E-12 | -0.334134467 | 0.412 | 0.612 | 8.56E-08 |
| HLA-DMB  | 4.09E-12 | -0.301844453 | 0.496 | 0.68  | 8.91E-08 |
| HSD17B7  | 4.12E-12 | 0.307332831  | 0.246 | 0.098 | 8.99E-08 |
| ANKRD28  | 5.18E-12 | 0.311342306  | 0.231 | 0.085 | 1.13E-07 |
| USP36    | 5.84E-12 | 0.329717727  | 0.282 | 0.126 | 1.27E-07 |
| NAIP     | 5.86E-12 | -0.26607199  | 0.658 | 0.791 | 1.28E-07 |
| PER1     | 6.12E-12 | 0.285242399  | 0.529 | 0.342 | 1.33E-07 |
| COX5A    | 6.90E-12 | -0.261562662 | 0.653 | 0.768 | 1.50E-07 |
| LBR      | 7.21E-12 | -0.323455462 | 0.204 | 0.391 | 1.57E-07 |
| SLC5A3   | 7.38E-12 | 0.309119146  | 0.231 | 0.083 | 1.61E-07 |
| TICAM1   | 8.63E-12 | 0.281982469  | 0.244 | 0.1   | 1.88E-07 |
| IER5     | 9.33E-12 | 0.465463782  | 0.511 | 0.355 | 2.03E-07 |
| FCHO2    | 1.15E-11 | -0.305080638 | 0.286 | 0.473 | 2.52E-07 |

|              |          |              |       |       |          |
|--------------|----------|--------------|-------|-------|----------|
| KMO          | 1.21E-11 | 0.381976473  | 0.351 | 0.184 | 2.64E-07 |
| NSL1         | 1.23E-11 | -0.28628943  | 0.193 | 0.388 | 2.68E-07 |
| CD84         | 1.44E-11 | -0.392965528 | 0.376 | 0.552 | 3.15E-07 |
| RAPGEF1      | 1.46E-11 | 0.3039044    | 0.271 | 0.119 | 3.18E-07 |
| RNF145       | 1.65E-11 | 0.296637054  | 0.422 | 0.25  | 3.60E-07 |
| SPAG9        | 1.76E-11 | 0.327827562  | 0.435 | 0.265 | 3.83E-07 |
| SLC46A1      | 1.92E-11 | -0.278711446 | 0.132 | 0.303 | 4.20E-07 |
| MT-ND4L      | 2.10E-11 | -0.267129953 | 0.992 | 0.993 | 4.57E-07 |
| LST1         | 2.20E-11 | -0.280896476 | 0.889 | 0.942 | 4.80E-07 |
| SAR1A        | 2.24E-11 | 0.283757034  | 0.328 | 0.163 | 4.89E-07 |
| TNFRSF1B     | 2.26E-11 | 0.356760735  | 0.708 | 0.61  | 4.93E-07 |
| MNDA         | 2.28E-11 | -0.379799333 | 0.431 | 0.594 | 4.98E-07 |
| JKAMP        | 2.45E-11 | -0.287822208 | 0.172 | 0.353 | 5.35E-07 |
| PNPLA8       | 2.48E-11 | 0.350747431  | 0.479 | 0.31  | 5.41E-07 |
| NDEL1        | 2.63E-11 | 0.266164642  | 0.225 | 0.086 | 5.74E-07 |
| GNA15        | 2.71E-11 | 0.341554952  | 0.321 | 0.171 | 5.91E-07 |
| GUK1         | 2.75E-11 | 0.374468953  | 0.689 | 0.587 | 5.99E-07 |
| CD300E       | 2.75E-11 | 0.274257652  | 0.185 | 0.058 | 6.00E-07 |
| SESTD1       | 2.85E-11 | 0.318411623  | 0.317 | 0.161 | 6.22E-07 |
| TYMP         | 2.86E-11 | 0.353267314  | 0.67  | 0.527 | 6.24E-07 |
| TRIB1        | 2.89E-11 | 0.317362248  | 0.479 | 0.303 | 6.31E-07 |
| PSAP         | 2.97E-11 | -0.259618453 | 0.964 | 0.944 | 6.48E-07 |
| DDIT4        | 3.03E-11 | -0.381508422 | 0.613 | 0.766 | 6.60E-07 |
| GFRA2        | 3.30E-11 | -0.356916777 | 0.235 | 0.405 | 7.20E-07 |
| TNFRSF21     | 3.87E-11 | 0.344215723  | 0.353 | 0.191 | 8.43E-07 |
| AC058791.1   | 4.12E-11 | 0.251082048  | 0.174 | 0.055 | 8.98E-07 |
| GRASP        | 4.22E-11 | 0.28774986   | 0.3   | 0.141 | 9.19E-07 |
| GABARAPL1    | 4.45E-11 | 0.299204737  | 0.414 | 0.24  | 9.71E-07 |
| NUDT16       | 4.70E-11 | -0.284270766 | 0.46  | 0.633 | 1.02E-06 |
| CD69         | 4.87E-11 | 0.320763814  | 0.143 | 0.033 | 1.06E-06 |
| ZNF106       | 5.32E-11 | -0.329607431 | 0.239 | 0.425 | 1.16E-06 |
| CCL20        | 5.43E-11 | 0.903706601  | 0.124 | 0.023 | 1.18E-06 |
| SDCBP        | 5.46E-11 | 0.270005651  | 0.914 | 0.877 | 1.19E-06 |
| CTD-3252C9.4 | 5.78E-11 | 0.329846559  | 0.275 | 0.128 | 1.26E-06 |
| PPP1R21      | 6.21E-11 | -0.264643672 | 0.095 | 0.247 | 1.35E-06 |
| EMD          | 6.57E-11 | 0.345802852  | 0.464 | 0.302 | 1.43E-06 |
| NEDD8        | 6.91E-11 | -0.284699457 | 0.454 | 0.635 | 1.51E-06 |
| GADD45A      | 7.35E-11 | 0.311157909  | 0.216 | 0.083 | 1.60E-06 |
| SPTLC2       | 7.45E-11 | -0.264110847 | 0.168 | 0.348 | 1.63E-06 |
| CD302        | 8.09E-11 | -0.250536787 | 0.853 | 0.924 | 1.76E-06 |
| ELF1         | 1.02E-10 | 0.380382032  | 0.637 | 0.504 | 2.23E-06 |
| NAGK         | 1.04E-10 | -0.279608493 | 0.334 | 0.529 | 2.27E-06 |
| PRDX1        | 1.08E-10 | -0.277881735 | 0.723 | 0.837 | 2.36E-06 |
| ATP1B1       | 1.13E-10 | -0.360874584 | 0.357 | 0.532 | 2.46E-06 |
| MEF2C        | 1.13E-10 | -0.303008004 | 0.382 | 0.582 | 2.47E-06 |
| MPHOSPH6     | 1.17E-10 | 0.305023837  | 0.279 | 0.134 | 2.54E-06 |
| SLC16A6      | 1.27E-10 | 0.326850777  | 0.204 | 0.076 | 2.77E-06 |
| ADAP2        | 1.30E-10 | -0.339506713 | 0.456 | 0.629 | 2.83E-06 |
| LAMTOR4      | 1.32E-10 | -0.262288956 | 0.695 | 0.791 | 2.88E-06 |
| UBAP1        | 1.40E-10 | 0.252984418  | 0.334 | 0.177 | 3.06E-06 |
| GLRX         | 1.44E-10 | -0.294720395 | 0.487 | 0.662 | 3.13E-06 |
| LIMS1        | 1.53E-10 | 0.321523395  | 0.708 | 0.587 | 3.33E-06 |
| FAM96A       | 1.59E-10 | -0.270243009 | 0.5   | 0.677 | 3.47E-06 |
| C4orf3       | 1.69E-10 | -0.268431799 | 0.489 | 0.653 | 3.68E-06 |
| UBB          | 1.74E-10 | 0.456623391  | 0.868 | 0.813 | 3.80E-06 |
| CHORDC1      | 1.85E-10 | 0.317186281  | 0.368 | 0.214 | 4.03E-06 |
| CSK          | 1.94E-10 | -0.288670097 | 0.254 | 0.439 | 4.23E-06 |
| NANS         | 2.14E-10 | 0.322414802  | 0.563 | 0.436 | 4.66E-06 |
| DOCK8        | 2.16E-10 | -0.296999756 | 0.265 | 0.434 | 4.72E-06 |
| ST3GAL1      | 2.46E-10 | 0.265242702  | 0.382 | 0.221 | 5.36E-06 |
| ZNF267       | 2.46E-10 | 0.319516052  | 0.401 | 0.252 | 5.37E-06 |
| RAB21        | 2.47E-10 | 0.252291887  | 0.309 | 0.154 | 5.39E-06 |
| GCLC         | 2.62E-10 | -0.259707977 | 0.164 | 0.333 | 5.70E-06 |
| FCGRT        | 2.66E-10 | -0.275613811 | 0.914 | 0.929 | 5.81E-06 |
| TCEB1        | 2.69E-10 | 0.354943253  | 0.607 | 0.483 | 5.86E-06 |
| STK38L       | 3.01E-10 | 0.31592583   | 0.305 | 0.161 | 6.56E-06 |
| MRPS34       | 3.22E-10 | -0.289892433 | 0.235 | 0.418 | 7.02E-06 |
| OAS1         | 3.27E-10 | -0.253383508 | 0.162 | 0.328 | 7.14E-06 |
| EGR2         | 3.32E-10 | -0.435683629 | 0.097 | 0.24  | 7.25E-06 |
| GLMP         | 3.33E-10 | -0.286855774 | 0.324 | 0.502 | 7.27E-06 |

|           |          |              |       |       |             |
|-----------|----------|--------------|-------|-------|-------------|
| EAF2      | 3.35E-10 | -0.274175207 | 0.202 | 0.376 | 7.30E-06    |
| 7-Sep     | 3.62E-10 | -0.274138306 | 0.361 | 0.546 | 7.90E-06    |
| PRELID1   | 3.76E-10 | 0.291274943  | 0.748 | 0.648 | 8.19E-06    |
| SMIM3     | 4.30E-10 | 0.272072784  | 0.296 | 0.154 | 9.37E-06    |
| SGK1      | 4.67E-10 | 0.355170121  | 0.794 | 0.677 | 1.02E-05    |
| BCL2L11   | 4.80E-10 | 0.262970261  | 0.271 | 0.126 | 1.05E-05    |
| STK17B    | 4.93E-10 | -0.272907384 | 0.357 | 0.546 | 1.08E-05    |
| NUCB1     | 5.14E-10 | 0.31974969   | 0.721 | 0.607 | 1.12E-05    |
| FLOT1     | 5.15E-10 | 0.273432969  | 0.374 | 0.222 | 1.12E-05    |
| TMM59     | 5.16E-10 | -0.258303251 | 0.744 | 0.804 | 1.12E-05    |
| RSRP1     | 5.20E-10 | -0.332578358 | 0.454 | 0.629 | 1.13E-05    |
| ATPIF1    | 5.36E-10 | -0.282887389 | 0.34  | 0.526 | 1.17E-05    |
| PIGA      | 5.94E-10 | 0.28829246   | 0.237 | 0.104 | 1.29E-05    |
| PDCD6     | 7.47E-10 | -0.263441644 | 0.237 | 0.421 | 1.63E-05    |
| TIPARP    | 7.48E-10 | 0.293603225  | 0.345 | 0.189 | 1.63E-05    |
| SPI1      | 7.66E-10 | -0.258364687 | 0.773 | 0.834 | 1.67E-05    |
| RAB1A     | 8.31E-10 | 0.317328634  | 0.576 | 0.473 | 1.81E-05    |
| UBC       | 9.01E-10 | 0.301982578  | 0.975 | 0.922 | 1.96E-05    |
| ATP5J2    | 9.04E-10 | -0.26358005  | 0.651 | 0.791 | 1.97E-05    |
| NAAA      | 1.01E-09 | -0.296376484 | 0.418 | 0.584 | 2.19E-05    |
| MLKL      | 1.31E-09 | 0.290975161  | 0.246 | 0.113 | 2.86E-05    |
| SFT2D2    | 1.33E-09 | -0.267165566 | 0.212 | 0.388 | 2.91E-05    |
| MT-CYB    | 1.35E-09 | -0.251094904 | 0.992 | 0.992 | 2.93E-05    |
| SLC9A8    | 1.49E-09 | 0.266870577  | 0.2   | 0.078 | 3.25E-05    |
| DYNLL1    | 1.53E-09 | -0.288470972 | 0.653 | 0.774 | 3.35E-05    |
| SDC3      | 1.55E-09 | -0.314362734 | 0.328 | 0.507 | 3.37E-05    |
| PDXK      | 1.58E-09 | 0.253596319  | 0.252 | 0.118 | 3.44E-05    |
| NDUFA4    | 1.70E-09 | -0.269577778 | 0.71  | 0.791 | 3.71E-05    |
| SNAP23    | 1.90E-09 | 0.332880223  | 0.578 | 0.451 | 4.14E-05    |
| BTG1      | 1.91E-09 | 0.26824645   | 0.859 | 0.786 | 4.16E-05    |
| GLIPR2    | 1.91E-09 | 0.271663824  | 0.319 | 0.177 | 4.17E-05    |
| SRSF3     | 1.96E-09 | 0.252266581  | 0.712 | 0.587 | 4.27E-05    |
| LINC01272 | 2.03E-09 | -0.357186683 | 0.649 | 0.746 | 4.43E-05    |
| ARL6IP5   | 2.16E-09 | -0.271954849 | 0.66  | 0.788 | 4.71E-05    |
| CRIP1     | 2.33E-09 | 0.396659148  | 0.525 | 0.386 | 5.08E-05    |
| AOA1      | 2.39E-09 | -0.307181259 | 0.429 | 0.579 | 5.22E-05    |
| TANK      | 2.49E-09 | 0.271374447  | 0.473 | 0.318 | 5.44E-05    |
| ZFAND5    | 2.56E-09 | 0.330690095  | 0.811 | 0.71  | 5.58E-05    |
| FAM20A    | 2.56E-09 | 0.27353889   | 0.424 | 0.277 | 5.58E-05    |
| PIAS1     | 2.57E-09 | -0.254859356 | 0.277 | 0.458 | 5.61E-05    |
| NCKAP1L   | 2.63E-09 | -0.313601044 | 0.332 | 0.498 | 5.74E-05    |
| ITGAX     | 2.65E-09 | 0.303231279  | 0.389 | 0.237 | 5.78E-05    |
| IL6ST     | 2.65E-09 | 0.316546877  | 0.416 | 0.265 | 5.78E-05    |
| DEGS1     | 2.67E-09 | -0.267813567 | 0.254 | 0.433 | 5.82E-05    |
| YTHDF3    | 2.77E-09 | 0.258542501  | 0.431 | 0.277 | 6.03E-05    |
| PSTPIP2   | 3.00E-09 | 0.297505865  | 0.353 | 0.206 | 6.54E-05    |
| NABP1     | 3.00E-09 | 0.288592145  | 0.708 | 0.615 | 6.54E-05    |
| IRF7      | 3.37E-09 | 0.304824397  | 0.42  | 0.277 | 7.35E-05    |
| ADRBK1    | 3.51E-09 | -0.277797121 | 0.242 | 0.42  | 7.66E-05    |
| ATP6V0D1  | 3.69E-09 | 0.280240983  | 0.672 | 0.575 | 8.04E-05    |
| IL1R2     | 4.22E-09 | 0.433264081  | 0.363 | 0.224 | 9.20E-05    |
| DPYD      | 4.26E-09 | -0.255380143 | 0.433 | 0.604 | 9.30E-05    |
| CFLAR     | 4.55E-09 | 0.265454442  | 0.634 | 0.489 | 9.92E-05    |
| SNX3      | 4.79E-09 | 0.258579694  | 0.851 | 0.776 | 0.000104364 |
| NDUFA1    | 5.80E-09 | -0.265100534 | 0.666 | 0.784 | 0.000126441 |
| GYPC      | 5.80E-09 | 0.255232188  | 0.63  | 0.488 | 0.000126589 |
| DDX3Y     | 5.99E-09 | 0.263360535  | 0.502 | 0.352 | 0.000130564 |
| SLC9A9    | 6.29E-09 | -0.281280524 | 0.137 | 0.279 | 0.00013707  |
| SEPP1     | 7.31E-09 | -0.412805319 | 0.718 | 0.808 | 0.000159395 |
| AFF4      | 7.36E-09 | 0.257763117  | 0.477 | 0.335 | 0.000160522 |
| RBP7      | 7.47E-09 | -0.319223153 | 0.67  | 0.774 | 0.000162841 |
| FCGR1A    | 7.71E-09 | 0.335793851  | 0.567 | 0.444 | 0.000168078 |
| ERGIC1    | 7.84E-09 | 0.282015375  | 0.328 | 0.184 | 0.000170978 |
| CD14      | 7.88E-09 | -0.251253736 | 0.811 | 0.879 | 0.000171935 |
| CD72      | 8.50E-09 | 0.286533776  | 0.475 | 0.33  | 0.000185427 |
| IVNS1ABP  | 8.54E-09 | 0.360537835  | 0.626 | 0.532 | 0.000186251 |
| NPEPPS    | 9.30E-09 | -0.254873972 | 0.151 | 0.297 | 0.000202747 |
| RGL1      | 9.56E-09 | -0.298193839 | 0.342 | 0.499 | 0.000208552 |
| EVL       | 9.71E-09 | -0.250018399 | 0.334 | 0.501 | 0.000211795 |
| UBE2J1    | 9.78E-09 | 0.285814724  | 0.622 | 0.522 | 0.000213307 |

|            |          |              |       |       |             |
|------------|----------|--------------|-------|-------|-------------|
| TUBB4B     | 1.03E-08 | 0.297300908  | 0.563 | 0.433 | 0.000224431 |
| DAD1       | 1.15E-08 | -0.267586864 | 0.542 | 0.668 | 0.000251781 |
| RILPL2     | 1.23E-08 | 0.289985385  | 0.605 | 0.498 | 0.000267677 |
| GCH1       | 1.24E-08 | 0.279563899  | 0.321 | 0.187 | 0.000270259 |
| UBE2F      | 1.28E-08 | 0.27353974   | 0.355 | 0.221 | 0.000279476 |
| ERN1       | 1.31E-08 | 0.258376188  | 0.233 | 0.113 | 0.000285387 |
| LILRA2     | 1.33E-08 | -0.282338067 | 0.416 | 0.557 | 0.000289008 |
| OCIAD1     | 1.43E-08 | -0.253762298 | 0.37  | 0.526 | 0.000312331 |
| EIF2AK4    | 1.49E-08 | 0.261641896  | 0.357 | 0.216 | 0.000325217 |
| COX7B      | 1.56E-08 | -0.282755706 | 0.674 | 0.773 | 0.000339551 |
| MPEG1      | 1.64E-08 | -0.282209413 | 0.59  | 0.718 | 0.000358477 |
| RASSF4     | 1.65E-08 | -0.304381983 | 0.504 | 0.663 | 0.000360491 |
| C11orf31   | 1.78E-08 | -0.268460735 | 0.424 | 0.574 | 0.000388994 |
| ATP1A1     | 1.85E-08 | 0.283525453  | 0.565 | 0.433 | 0.000403615 |
| WWP1       | 1.86E-08 | -0.280939751 | 0.244 | 0.4   | 0.000404793 |
| NPL        | 2.05E-08 | -0.256043321 | 0.487 | 0.622 | 0.000447975 |
| LAMTOR1    | 2.18E-08 | -0.269868077 | 0.498 | 0.629 | 0.000474624 |
| IL10       | 2.48E-08 | 0.589301379  | 0.328 | 0.196 | 0.000541004 |
| LINC00152  | 2.78E-08 | 0.326976684  | 0.334 | 0.199 | 0.000606977 |
| PTPRE      | 2.89E-08 | 0.309769877  | 0.54  | 0.423 | 0.000630619 |
| CD164      | 3.04E-08 | -0.252313917 | 0.718 | 0.799 | 0.000662615 |
| ID2        | 3.11E-08 | -0.316981421 | 0.672 | 0.763 | 0.000678041 |
| BASP1      | 3.19E-08 | 0.285087218  | 0.475 | 0.343 | 0.000694695 |
| TNFSF13B   | 3.19E-08 | 0.365567167  | 0.485 | 0.368 | 0.000695631 |
| C20orf27   | 3.49E-08 | -0.256932566 | 0.248 | 0.403 | 0.000761145 |
| TNF        | 3.55E-08 | -0.543300595 | 0.221 | 0.368 | 0.000773745 |
| DPEP2      | 3.58E-08 | -0.255037114 | 0.252 | 0.405 | 0.000781733 |
| MT-ND1     | 3.68E-08 | -0.254867279 | 0.983 | 0.985 | 0.000802383 |
| SOD1       | 3.99E-08 | 0.364263131  | 0.662 | 0.582 | 0.000870684 |
| ANXA2      | 4.02E-08 | 0.267408476  | 0.704 | 0.607 | 0.000876918 |
| SNX6       | 4.04E-08 | -0.250353154 | 0.645 | 0.753 | 0.000881848 |
| CFD        | 4.07E-08 | -0.28738182  | 0.75  | 0.829 | 0.000888416 |
| TREM1      | 4.26E-08 | 0.250195414  | 0.275 | 0.148 | 0.000929925 |
| ALB        | 4.38E-08 | 0.258312238  | 0.42  | 0.265 | 0.000954305 |
| ZCCHC6     | 4.50E-08 | -0.295965734 | 0.393 | 0.539 | 0.000981501 |
| GBP5       | 4.58E-08 | 0.250081411  | 0.164 | 0.063 | 0.00099809  |
| TGOLN2     | 4.73E-08 | -0.252600934 | 0.319 | 0.479 | 0.001031944 |
| TCIRG1     | 4.93E-08 | -0.272832964 | 0.534 | 0.657 | 0.001075366 |
| ELOVL1     | 6.16E-08 | -0.250364835 | 0.29  | 0.439 | 0.001342967 |
| HNMT       | 6.41E-08 | -0.260733379 | 0.521 | 0.653 | 0.001397568 |
| CEBPB      | 6.67E-08 | 0.257552267  | 0.75  | 0.662 | 0.001455339 |
| CSF2RB     | 7.14E-08 | 0.264076296  | 0.233 | 0.119 | 0.001556008 |
| GOLPH3     | 7.28E-08 | 0.268444002  | 0.437 | 0.32  | 0.001587527 |
| MBNL1      | 7.46E-08 | -0.269339676 | 0.538 | 0.677 | 0.001627963 |
| DNASE2     | 7.75E-08 | -0.266424575 | 0.395 | 0.542 | 0.001690799 |
| AKIRIN2    | 7.93E-08 | -0.262200779 | 0.515 | 0.645 | 0.001729198 |
| NRP1       | 8.24E-08 | -0.262023026 | 0.275 | 0.431 | 0.001796612 |
| CYCS       | 9.09E-08 | 0.453676051  | 0.626 | 0.541 | 0.0019818   |
| LILRA5     | 1.03E-07 | 0.319979054  | 0.523 | 0.403 | 0.002241733 |
| MAT2A      | 1.13E-07 | 0.300172654  | 0.634 | 0.524 | 0.00246623  |
| AP000769.1 | 1.14E-07 | 0.333866293  | 0.311 | 0.192 | 0.002490787 |
| JUNB       | 1.20E-07 | -0.273026641 | 0.931 | 0.937 | 0.002626078 |
| TUBA1A     | 1.39E-07 | 0.33674038   | 0.422 | 0.294 | 0.003030241 |
| MYO1F      | 1.45E-07 | -0.263206363 | 0.443 | 0.589 | 0.003171697 |
| APP        | 1.84E-07 | 0.294230992  | 0.29  | 0.171 | 0.004002756 |
| TMIGD3     | 2.11E-07 | -0.442788357 | 0.382 | 0.488 | 0.004608676 |
| SAA1       | 2.29E-07 | 0.382474073  | 0.244 | 0.129 | 0.004999353 |
| CCL3L3     | 2.66E-07 | -0.63320467  | 0.34  | 0.461 | 0.005805131 |
| PRDM1      | 2.75E-07 | 0.251731971  | 0.233 | 0.123 | 0.005987764 |
| ACSL3      | 2.88E-07 | 0.328454438  | 0.399 | 0.289 | 0.006290737 |
| PRNP       | 3.07E-07 | 0.304248739  | 0.723 | 0.637 | 0.006691054 |
| MARCKS     | 3.11E-07 | 0.29002367   | 0.691 | 0.62  | 0.006790211 |
| LGALS1     | 3.28E-07 | 0.253204682  | 0.84  | 0.765 | 0.007145008 |
| ILF3-AS1   | 3.45E-07 | -0.255227828 | 0.084 | 0.196 | 0.007533817 |
| ABCC5      | 4.00E-07 | -0.264822738 | 0.229 | 0.368 | 0.008712862 |
| S100A10    | 4.04E-07 | 0.351210217  | 0.803 | 0.731 | 0.008821007 |
| MAF        | 5.17E-07 | -0.260770782 | 0.529 | 0.662 | 0.011274186 |
| CDC37      | 5.23E-07 | 0.302799065  | 0.63  | 0.547 | 0.011395912 |
| EML4       | 5.83E-07 | 0.284890827  | 0.374 | 0.247 | 0.012717345 |
| SEC62      | 5.85E-07 | 0.250989824  | 0.697 | 0.602 | 0.012766575 |

|          |          |              |       |       |             |
|----------|----------|--------------|-------|-------|-------------|
| SEPHS2   | 6.64E-07 | 0.292457567  | 0.368 | 0.264 | 0.014483942 |
| CTNNB1   | 6.67E-07 | 0.285782164  | 0.433 | 0.327 | 0.01455341  |
| ETF1     | 7.04E-07 | 0.253925033  | 0.433 | 0.322 | 0.015360219 |
| MGST2    | 7.22E-07 | -0.25900879  | 0.33  | 0.471 | 0.015746418 |
| ATP6V1C1 | 7.99E-07 | 0.268324177  | 0.38  | 0.267 | 0.017432419 |
| ARL8B    | 8.61E-07 | 0.253581072  | 0.563 | 0.446 | 0.018769444 |
| WDR45B   | 1.15E-06 | 0.31617893   | 0.298 | 0.192 | 0.024983677 |
| CTSA     | 1.48E-06 | -0.260421896 | 0.641 | 0.725 | 0.032178358 |
| CYTIP    | 1.54E-06 | -0.263923578 | 0.332 | 0.453 | 0.033678974 |
| MT1M     | 1.84E-06 | 0.640547592  | 0.143 | 0.058 | 0.04020151  |
| ATF7IP2  | 1.89E-06 | 0.406975724  | 0.204 | 0.108 | 0.041158925 |
| DNAJB4   | 2.22E-06 | 0.287236896  | 0.321 | 0.207 | 0.048467573 |

List of differentially expressed genes of VCAN TMo in overall stage (PR versus PP)

| gene     | p val    | avg logFC    | pct.1 | pct.2 | p val adj |
|----------|----------|--------------|-------|-------|-----------|
| HLA-DRB5 | 1.22E-74 | -1.341245149 | 0.401 | 0.947 | 2.66E-70  |
| THBS1    | 5.71E-69 | 1.404183804  | 0.962 | 0.786 | 1.25E-64  |
| NAMPT    | 9.17E-68 | 1.014836809  | 0.993 | 0.866 | 2.00E-63  |
| TMSB4X   | 2.48E-58 | -0.438032705 | 1     | 1     | 5.41E-54  |
| ACSL1    | 1.29E-53 | 0.989413486  | 0.89  | 0.629 | 2.81E-49  |
| DEFA3    | 5.89E-52 | -0.805940579 | 0.017 | 0.487 | 1.28E-47  |
| EEF1A1   | 4.11E-51 | -0.400257477 | 0.998 | 1     | 8.97E-47  |
| VCAN     | 4.13E-50 | 0.82932295   | 0.983 | 0.944 | 9.00E-46  |
| CST3     | 7.83E-50 | -0.575722624 | 0.998 | 1     | 1.71E-45  |
| GPX1     | 9.86E-48 | 0.692557525  | 0.957 | 0.923 | 2.15E-43  |
| HLA-DQB1 | 1.46E-45 | -0.888432165 | 0.332 | 0.831 | 3.18E-41  |
| H3F3B    | 1.48E-40 | 0.532472299  | 0.995 | 0.979 | 3.24E-36  |
| ASPH     | 2.97E-40 | 0.948265473  | 0.649 | 0.228 | 6.49E-36  |
| TRMT6    | 1.57E-39 | 0.995298514  | 0.558 | 0.131 | 3.43E-35  |
| NACA     | 1.89E-39 | -0.396664373 | 0.993 | 0.997 | 4.12E-35  |
| S100A4   | 1.10E-38 | -0.437069698 | 1     | 1     | 2.40E-34  |
| SAT1     | 1.47E-38 | 0.528563099  | 0.998 | 0.994 | 3.20E-34  |
| LITAF    | 1.49E-38 | 0.895367817  | 0.842 | 0.576 | 3.25E-34  |
| FPR1     | 7.94E-38 | 0.755792067  | 0.9   | 0.742 | 1.73E-33  |
| EVI2B    | 1.05E-37 | -0.672751859 | 0.556 | 0.905 | 2.29E-33  |
| TPM4     | 6.21E-37 | 0.754954295  | 0.864 | 0.659 | 1.35E-32  |
| RPL11    | 9.68E-37 | -0.309780997 | 1     | 0.997 | 2.11E-32  |
| RPL5     | 2.36E-36 | -0.413935873 | 0.964 | 0.994 | 5.15E-32  |
| SLC2A3   | 2.60E-36 | 0.919358291  | 0.833 | 0.588 | 5.67E-32  |
| RPL29    | 5.18E-35 | -0.326038368 | 0.988 | 0.994 | 1.13E-30  |
| RPL10    | 8.51E-35 | -0.296923172 | 1     | 1     | 1.86E-30  |
| RPS29    | 3.64E-34 | 0.514029067  | 0.952 | 0.92  | 7.95E-30  |
| TNFSF10  | 4.19E-34 | -0.602884575 | 0.045 | 0.415 | 9.13E-30  |
| CTSL     | 5.85E-34 | 1.642462181  | 0.642 | 0.306 | 1.28E-29  |
| PABPC1   | 7.23E-34 | -0.445269196 | 0.931 | 0.985 | 1.58E-29  |
| UPP1     | 1.95E-33 | 0.730670685  | 0.847 | 0.605 | 4.26E-29  |
| SLC25A6  | 4.03E-33 | -0.491063578 | 0.881 | 0.97  | 8.79E-29  |
| RPL18    | 4.57E-32 | -0.320428326 | 0.995 | 0.991 | 9.97E-28  |
| AGFG1    | 9.45E-32 | 0.873945364  | 0.663 | 0.344 | 2.06E-27  |
| VSIG4    | 2.73E-31 | -0.822848692 | 0.1   | 0.469 | 5.95E-27  |
| S100A9   | 5.05E-31 | 0.74926727   | 0.993 | 0.982 | 1.10E-26  |
| S100A12  | 8.86E-31 | 0.876640734  | 0.938 | 0.843 | 1.93E-26  |
| AQP9     | 1.55E-30 | 0.779241334  | 0.702 | 0.359 | 3.37E-26  |
| VAMP8    | 1.63E-30 | -0.576037427 | 0.613 | 0.908 | 3.55E-26  |
| PLSCR1   | 2.38E-30 | 0.739896614  | 0.754 | 0.496 | 5.19E-26  |
| RNASE6   | 4.81E-30 | -0.622591279 | 0.368 | 0.783 | 1.05E-25  |
| RPL7A    | 5.97E-30 | -0.30241318  | 0.986 | 0.994 | 1.30E-25  |
| RPL30    | 6.11E-30 | -0.26929012  | 0.998 | 0.997 | 1.33E-25  |
| BLVRB    | 6.56E-30 | -0.584915588 | 0.63  | 0.911 | 1.43E-25  |
| RPS3A    | 2.12E-29 | -0.272885954 | 0.995 | 0.997 | 4.63E-25  |
| S100A8   | 3.02E-29 | 0.654277195  | 0.998 | 0.994 | 6.59E-25  |
| SRGN     | 6.51E-29 | 0.385107163  | 1     | 0.997 | 1.42E-24  |
| TKT      | 6.83E-29 | -0.544048562 | 0.823 | 0.944 | 1.49E-24  |
| RPS14    | 8.01E-29 | -0.267087239 | 0.993 | 1     | 1.75E-24  |
| RPL6     | 9.03E-29 | -0.32319182  | 0.986 | 0.994 | 1.97E-24  |
| SULT1A1  | 2.35E-28 | -0.589277829 | 0.208 | 0.608 | 5.13E-24  |
| FPR2     | 6.21E-28 | 0.861722553  | 0.582 | 0.261 | 1.35E-23  |

|          |          |              |       |       |          |
|----------|----------|--------------|-------|-------|----------|
| ACTB     | 6.77E-28 | 0.267754367  | 1     | 1     | 1.48E-23 |
| GNB2L1   | 9.38E-28 | -0.345188962 | 0.974 | 0.985 | 2.04E-23 |
| HBB      | 1.51E-27 | -1.755314906 | 0.086 | 0.43  | 3.29E-23 |
| SELL     | 1.75E-27 | 0.935285802  | 0.69  | 0.442 | 3.82E-23 |
| CSF1R    | 1.91E-27 | -0.566643388 | 0.126 | 0.493 | 4.17E-23 |
| HIF1A    | 1.94E-27 | 0.781032434  | 0.723 | 0.478 | 4.22E-23 |
| LIMD2    | 3.17E-27 | -0.560098539 | 0.372 | 0.757 | 6.91E-23 |
| IFI30    | 3.62E-27 | 0.643987986  | 0.854 | 0.757 | 7.90E-23 |
| RPL14    | 4.84E-27 | -0.324304399 | 0.971 | 1     | 1.06E-22 |
| RPS7     | 8.64E-27 | -0.279139646 | 0.998 | 0.991 | 1.88E-22 |
| PLD3     | 1.34E-26 | -0.57273893  | 0.301 | 0.68  | 2.93E-22 |
| RBKS     | 1.74E-26 | -0.654625604 | 0.181 | 0.552 | 3.79E-22 |
| IL1R2    | 2.19E-26 | 1.1487653    | 0.599 | 0.285 | 4.77E-22 |
| SEC11A   | 2.60E-26 | -0.495118226 | 0.644 | 0.935 | 5.66E-22 |
| CD74     | 3.15E-26 | -0.438018491 | 0.988 | 1     | 6.88E-22 |
| C20orf27 | 3.44E-26 | -0.525481592 | 0.181 | 0.567 | 7.50E-22 |
| GIMAP1   | 2.78E-25 | -0.478100783 | 0.076 | 0.395 | 6.05E-21 |
| TIMP1    | 4.64E-25 | 0.769397064  | 0.979 | 0.955 | 1.01E-20 |
| PAG1     | 1.37E-24 | 0.746280079  | 0.601 | 0.306 | 2.99E-20 |
| RPLP0    | 1.61E-24 | -0.348192373 | 0.959 | 0.997 | 3.52E-20 |
| SLC39A8  | 3.38E-24 | 0.908768023  | 0.437 | 0.119 | 7.36E-20 |
| FCER1G   | 5.01E-24 | 0.379518704  | 1     | 0.994 | 1.09E-19 |
| TPM3     | 5.35E-24 | 0.458054877  | 0.921 | 0.893 | 1.17E-19 |
| CD63     | 8.26E-24 | 0.530217808  | 0.916 | 0.858 | 1.80E-19 |
| PIM3     | 1.33E-23 | 0.664739748  | 0.535 | 0.217 | 2.90E-19 |
| AREG     | 1.69E-23 | 0.845916132  | 0.871 | 0.62  | 3.69E-19 |
| CD93     | 2.62E-23 | 0.728416961  | 0.64  | 0.38  | 5.72E-19 |
| MIS18BP1 | 5.71E-23 | -0.435809102 | 0.084 | 0.392 | 1.24E-18 |
| FCGR3A   | 7.76E-23 | -0.650427976 | 0.107 | 0.415 | 1.69E-18 |
| PIM1     | 1.15E-22 | 0.704933089  | 0.396 | 0.107 | 2.50E-18 |
| HNMT     | 4.46E-22 | -0.4679704   | 0.239 | 0.611 | 9.72E-18 |
| METTL7A  | 5.59E-22 | -0.463350283 | 0.153 | 0.496 | 1.22E-17 |
| TYMP     | 6.10E-22 | 0.573492934  | 0.854 | 0.751 | 1.33E-17 |
| MS4A7    | 6.85E-22 | -0.565557254 | 0.305 | 0.677 | 1.49E-17 |
| CD300E   | 1.03E-21 | 0.791875715  | 0.628 | 0.38  | 2.24E-17 |
| MARCKS   | 1.03E-21 | 0.80351017   | 0.632 | 0.368 | 2.25E-17 |
| GCA      | 1.26E-21 | 0.593105549  | 0.869 | 0.81  | 2.75E-17 |
| MCTP2    | 1.46E-21 | 0.561991429  | 0.308 | 0.042 | 3.18E-17 |
| GIMAP7   | 1.52E-21 | -0.528451712 | 0.048 | 0.306 | 3.32E-17 |
| MS4A6A   | 1.62E-21 | -0.486497771 | 0.745 | 0.938 | 3.53E-17 |
| IFITM2   | 2.44E-21 | 0.607287044  | 0.936 | 0.947 | 5.32E-17 |
| RAB31    | 2.52E-21 | 0.631109544  | 0.783 | 0.608 | 5.48E-17 |
| GIMAP2   | 2.72E-21 | -0.416903908 | 0.053 | 0.318 | 5.93E-17 |
| MNDA     | 3.19E-21 | -0.496526382 | 0.742 | 0.938 | 6.95E-17 |
| RPS4X    | 4.82E-21 | -0.26479748  | 0.99  | 0.997 | 1.05E-16 |
| HVCN1    | 4.85E-21 | -0.414996347 | 0.043 | 0.294 | 1.06E-16 |
| PSTPIP1  | 4.97E-21 | -0.464462887 | 0.184 | 0.519 | 1.08E-16 |
| BIN2     | 7.36E-21 | -0.435503656 | 0.165 | 0.504 | 1.61E-16 |
| PYCARD   | 7.54E-21 | -0.445354974 | 0.659 | 0.902 | 1.65E-16 |
| HSD17B11 | 8.89E-21 | -0.482883772 | 0.518 | 0.81  | 1.94E-16 |
| RUNX1    | 9.19E-21 | 0.606287952  | 0.578 | 0.303 | 2.00E-16 |
| MAP3K8   | 9.37E-21 | 0.683638245  | 0.733 | 0.525 | 2.04E-16 |
| ETS2     | 1.03E-20 | 0.593161447  | 0.759 | 0.632 | 2.25E-16 |
| ADAMTS2  | 1.47E-20 | -0.473438765 | 0.103 | 0.398 | 3.21E-16 |
| MCEMP1   | 1.73E-20 | 0.714910859  | 0.661 | 0.439 | 3.76E-16 |
| RCSD1    | 2.29E-20 | -0.432419291 | 0.136 | 0.454 | 5.00E-16 |
| LRG1     | 2.52E-20 | 0.635080921  | 0.315 | 0.053 | 5.51E-16 |
| ATP5G2   | 2.97E-20 | -0.330929784 | 0.94  | 0.985 | 6.48E-16 |
| PFKFB3   | 3.30E-20 | 0.663527286  | 0.461 | 0.184 | 7.20E-16 |
| STX10    | 3.84E-20 | -0.395813608 | 0.232 | 0.596 | 8.37E-16 |
| NUP214   | 4.54E-20 | -0.498242459 | 0.265 | 0.608 | 9.90E-16 |
| HLA-DPA1 | 8.43E-20 | -0.601378329 | 0.575 | 0.861 | 1.84E-15 |
| FXYD5    | 1.13E-19 | -0.374461475 | 0.866 | 0.97  | 2.45E-15 |
| FLT3     | 1.37E-19 | -0.353315018 | 0.079 | 0.356 | 2.98E-15 |
| JUNB     | 1.51E-19 | -0.376573371 | 0.962 | 0.979 | 3.29E-15 |
| SAMSN1   | 1.78E-19 | 0.533983725  | 0.878 | 0.813 | 3.89E-15 |
| SLC25A37 | 1.87E-19 | 0.586656471  | 0.609 | 0.362 | 4.07E-15 |
| RNASE2   | 2.29E-19 | -0.51865364  | 0.282 | 0.623 | 5.00E-15 |
| LDHB     | 6.84E-19 | -0.476129093 | 0.332 | 0.665 | 1.49E-14 |
| FAM65B   | 9.64E-19 | 0.617948065  | 0.685 | 0.481 | 2.10E-14 |

|          |          |              |       |       |          |
|----------|----------|--------------|-------|-------|----------|
| SERPINB1 | 1.22E-18 | 0.475967061  | 0.926 | 0.902 | 2.66E-14 |
| HLA-DPB1 | 1.45E-18 | -0.53409505  | 0.516 | 0.801 | 3.17E-14 |
| RBM47    | 1.55E-18 | 0.589164308  | 0.666 | 0.436 | 3.38E-14 |
| DOK2     | 1.60E-18 | -0.377060393 | 0.368 | 0.718 | 3.49E-14 |
| EEF2     | 2.15E-18 | -0.383158941 | 0.847 | 0.95  | 4.70E-14 |
| MAFB     | 2.27E-18 | 0.607548346  | 0.857 | 0.804 | 4.96E-14 |
| JARID2   | 3.08E-18 | 0.65509889   | 0.461 | 0.214 | 6.71E-14 |
| IL18     | 5.72E-18 | -0.384748368 | 0.126 | 0.415 | 1.25E-13 |
| MT-ND3   | 6.34E-18 | 0.262101737  | 1     | 0.997 | 1.38E-13 |
| CFL1     | 8.26E-18 | 0.268113825  | 0.99  | 0.988 | 1.80E-13 |
| MYL6     | 8.88E-18 | 0.298708831  | 0.99  | 1     | 1.94E-13 |
| B4GALT5  | 1.13E-17 | 0.587174869  | 0.372 | 0.122 | 2.45E-13 |
| RBMS1    | 1.42E-17 | 0.587570045  | 0.606 | 0.395 | 3.09E-13 |
| CD37     | 2.22E-17 | -0.382636444 | 0.692 | 0.917 | 4.85E-13 |
| HP       | 2.42E-17 | 0.535153807  | 0.241 | 0.024 | 5.28E-13 |
| GNA15    | 4.80E-17 | 0.572533599  | 0.391 | 0.145 | 1.05E-12 |
| FGL2     | 6.99E-17 | -0.433595444 | 0.425 | 0.742 | 1.53E-12 |
| P2RY13   | 9.52E-17 | -0.356626701 | 0.036 | 0.24  | 2.08E-12 |
| LILRA5   | 1.27E-16 | 0.561691765  | 0.766 | 0.653 | 2.77E-12 |
| NR4A1    | 1.34E-16 | -0.572029129 | 0.406 | 0.677 | 2.93E-12 |
| TOP1     | 1.55E-16 | 0.616957399  | 0.592 | 0.389 | 3.37E-12 |
| DNASE2   | 1.55E-16 | -0.330159309 | 0.06  | 0.288 | 3.38E-12 |
| CD1D     | 1.67E-16 | -0.335602186 | 0.129 | 0.407 | 3.64E-12 |
| GLRX     | 1.68E-16 | -0.438602278 | 0.449 | 0.76  | 3.67E-12 |
| SLC25A5  | 2.20E-16 | -0.403134777 | 0.656 | 0.861 | 4.81E-12 |
| CRTAP    | 2.47E-16 | -0.41957517  | 0.482 | 0.757 | 5.38E-12 |
| EIF3E    | 2.70E-16 | -0.359245305 | 0.656 | 0.887 | 5.89E-12 |
| BTG1     | 2.77E-16 | -0.374286647 | 0.842 | 0.958 | 6.05E-12 |
| ABI3     | 3.01E-16 | -0.380580745 | 0.076 | 0.309 | 6.57E-12 |
| C1orf162 | 3.08E-16 | -0.364585367 | 0.816 | 0.973 | 6.72E-12 |
| LY86     | 3.53E-16 | -0.383835148 | 0.437 | 0.745 | 7.69E-12 |
| GPR65    | 3.55E-16 | -0.417059395 | 0.284 | 0.596 | 7.75E-12 |
| PAK1     | 4.81E-16 | -0.365869057 | 0.107 | 0.365 | 1.05E-11 |
| SLC7A7   | 5.52E-16 | -0.392917364 | 0.403 | 0.703 | 1.20E-11 |
| MT-CYB   | 6.20E-16 | 0.296251057  | 1     | 1     | 1.35E-11 |
| GSTK1    | 6.88E-16 | -0.381209179 | 0.563 | 0.849 | 1.50E-11 |
| POMP     | 8.10E-16 | 0.431824242  | 0.845 | 0.804 | 1.77E-11 |
| CKAP4    | 9.11E-16 | 0.595100445  | 0.492 | 0.261 | 1.99E-11 |
| SERPINB9 | 1.26E-15 | 0.566170805  | 0.589 | 0.377 | 2.74E-11 |
| SH3BP1   | 1.36E-15 | -0.341432958 | 0.1   | 0.35  | 2.96E-11 |
| GLTSCR2  | 1.55E-15 | -0.41357995  | 0.344 | 0.65  | 3.38E-11 |
| ZFP36L2  | 1.63E-15 | -0.423080566 | 0.704 | 0.911 | 3.55E-11 |
| CMTM7    | 1.63E-15 | -0.392983938 | 0.289 | 0.608 | 3.56E-11 |
| FCGR1A   | 1.82E-15 | 0.627832275  | 0.666 | 0.51  | 3.97E-11 |
| ZEB2     | 1.97E-15 | 0.406980822  | 0.897 | 0.902 | 4.31E-11 |
| RGCC     | 2.18E-15 | 0.887714837  | 0.411 | 0.166 | 4.75E-11 |
| NFKBIZ   | 2.61E-15 | -0.560079273 | 0.42  | 0.685 | 5.70E-11 |
| CXCL3    | 2.64E-15 | -1.21227825  | 0.372 | 0.605 | 5.75E-11 |
| CALHM2   | 2.66E-15 | -0.284324531 | 0.045 | 0.246 | 5.79E-11 |
| OXA1L    | 3.22E-15 | -0.394737495 | 0.296 | 0.596 | 7.02E-11 |
| CD52     | 3.58E-15 | -0.531549    | 0.599 | 0.828 | 7.81E-11 |
| STXBP2   | 4.39E-15 | 0.598695781  | 0.862 | 0.84  | 9.57E-11 |
| NR4A2    | 4.86E-15 | -0.459784227 | 0.618 | 0.834 | 1.06E-10 |
| RNASET2  | 5.39E-15 | -0.420330882 | 0.542 | 0.819 | 1.17E-10 |
| EEF1G    | 5.96E-15 | -0.31401012  | 0.718 | 0.884 | 1.30E-10 |
| FAM96A   | 6.50E-15 | -0.392926401 | 0.32  | 0.62  | 1.42E-10 |
| GK5      | 6.75E-15 | 0.426431923  | 0.246 | 0.042 | 1.47E-10 |
| CD82     | 6.78E-15 | 0.494889427  | 0.341 | 0.116 | 1.48E-10 |
| AP1S2    | 8.43E-15 | -0.359357172 | 0.706 | 0.893 | 1.84E-10 |
| OGFRL1   | 9.69E-15 | -0.320648262 | 0.091 | 0.326 | 2.11E-10 |
| ATP1A1   | 9.86E-15 | 0.528642481  | 0.609 | 0.442 | 2.15E-10 |
| HSPA8    | 1.02E-14 | -0.308291799 | 0.589 | 0.822 | 2.22E-10 |
| LIPA     | 1.17E-14 | -0.500057641 | 0.334 | 0.626 | 2.55E-10 |
| MCL1     | 1.17E-14 | 0.347691396  | 0.931 | 0.902 | 2.56E-10 |
| APEX1    | 1.25E-14 | -0.373236718 | 0.198 | 0.478 | 2.72E-10 |
| LPAR6    | 1.33E-14 | -0.329022521 | 0.033 | 0.214 | 2.91E-10 |
| ALDH2    | 1.37E-14 | -0.354958719 | 0.344 | 0.656 | 2.99E-10 |
| SEMA6B   | 1.39E-14 | 0.461189773  | 0.234 | 0.039 | 3.02E-10 |
| RGS14    | 1.69E-14 | -0.28192467  | 0.055 | 0.258 | 3.69E-10 |
| RASSF4   | 1.72E-14 | -0.391258518 | 0.141 | 0.392 | 3.75E-10 |



|            |          |              |       |       |          |
|------------|----------|--------------|-------|-------|----------|
| PHB2       | 2.14E-14 | -0.357829176 | 0.308 | 0.596 | 4.66E-10 |
| NME3       | 2.25E-14 | -0.282722121 | 0.091 | 0.323 | 4.90E-10 |
| JKAMP      | 2.36E-14 | -0.268912131 | 0.086 | 0.318 | 5.14E-10 |
| EIF4EBP1   | 2.44E-14 | -0.342035037 | 0.186 | 0.466 | 5.32E-10 |
| SRSF2      | 2.53E-14 | 0.481968712  | 0.704 | 0.579 | 5.52E-10 |
| LST1       | 2.82E-14 | -0.353027314 | 0.804 | 0.95  | 6.15E-10 |
| RSL24D1    | 3.20E-14 | -0.34497125  | 0.413 | 0.709 | 6.97E-10 |
| CLNS1A     | 3.31E-14 | -0.308933704 | 0.141 | 0.398 | 7.22E-10 |
| SLA        | 3.33E-14 | 0.522983732  | 0.628 | 0.448 | 7.26E-10 |
| RELB       | 3.47E-14 | 0.544729368  | 0.346 | 0.134 | 7.57E-10 |
| CXCL2      | 3.75E-14 | -0.887324338 | 0.511 | 0.721 | 8.17E-10 |
| CLEC2B     | 4.64E-14 | -0.346246205 | 0.243 | 0.546 | 1.01E-09 |
| TMEM134    | 4.79E-14 | -0.261086847 | 0.036 | 0.214 | 1.05E-09 |
| AMPH       | 4.89E-14 | -0.305142647 | 0.031 | 0.205 | 1.07E-09 |
| RPL3       | 5.59E-14 | -0.268557831 | 0.933 | 0.979 | 1.22E-09 |
| POU2F2     | 5.86E-14 | -0.264323062 | 0.236 | 0.543 | 1.28E-09 |
| HLA-DMB    | 5.97E-14 | -0.321297743 | 0.167 | 0.43  | 1.30E-09 |
| GRINA      | 1.10E-13 | 0.418699076  | 0.828 | 0.786 | 2.39E-09 |
| CNPY3      | 1.12E-13 | -0.354768827 | 0.496 | 0.772 | 2.45E-09 |
| SDC2       | 1.24E-13 | 0.4546952    | 0.21  | 0.03  | 2.71E-09 |
| SLCO4A1    | 1.30E-13 | 0.417504339  | 0.205 | 0.03  | 2.84E-09 |
| EIF4B      | 1.36E-13 | -0.331705973 | 0.442 | 0.721 | 2.97E-09 |
| APLP2      | 1.56E-13 | 0.436471339  | 0.845 | 0.813 | 3.40E-09 |
| HMGN3      | 1.74E-13 | -0.337348565 | 0.267 | 0.546 | 3.80E-09 |
| MT2A       | 1.89E-13 | 1.636275718  | 0.749 | 0.677 | 4.13E-09 |
| RPL36A     | 1.91E-13 | 0.344107061  | 0.9   | 0.905 | 4.16E-09 |
| BCL3       | 1.99E-13 | 0.452271233  | 0.47  | 0.243 | 4.34E-09 |
| TECR       | 2.07E-13 | -0.310945642 | 0.107 | 0.335 | 4.52E-09 |
| EIF3M      | 2.14E-13 | -0.353577386 | 0.52  | 0.789 | 4.67E-09 |
| ASGR1      | 2.18E-13 | -0.360739887 | 0.263 | 0.552 | 4.76E-09 |
| RSL1D1     | 2.50E-13 | -0.391940722 | 0.365 | 0.659 | 5.45E-09 |
| ZNF581     | 2.53E-13 | -0.28757085  | 0.064 | 0.264 | 5.52E-09 |
| TNF        | 2.90E-13 | -0.892699849 | 0.141 | 0.362 | 6.32E-09 |
| CXCL8      | 3.64E-13 | -0.806642735 | 0.537 | 0.709 | 7.95E-09 |
| POLR1D     | 4.21E-13 | -0.316428213 | 0.279 | 0.582 | 9.18E-09 |
| FLI1       | 4.57E-13 | -0.341245376 | 0.184 | 0.439 | 9.97E-09 |
| GOS2       | 4.72E-13 | 0.619564905  | 0.525 | 0.279 | 1.03E-08 |
| GSN        | 5.83E-13 | -0.345574912 | 0.222 | 0.499 | 1.27E-08 |
| MID1IP1    | 6.27E-13 | -0.443701271 | 0.167 | 0.409 | 1.37E-08 |
| UQCRB      | 6.89E-13 | -0.289111334 | 0.811 | 0.961 | 1.50E-08 |
| UQCRH      | 7.05E-13 | -0.305793287 | 0.785 | 0.92  | 1.54E-08 |
| PPIF       | 8.31E-13 | 0.55505819   | 0.484 | 0.282 | 1.81E-08 |
| CTSB       | 9.50E-13 | 0.442945072  | 0.936 | 0.902 | 2.07E-08 |
| IL1RAP     | 1.01E-12 | 0.544057788  | 0.372 | 0.163 | 2.20E-08 |
| DBNDD2     | 1.02E-12 | -0.274297258 | 0.06  | 0.246 | 2.23E-08 |
| IGBP1      | 1.09E-12 | -0.301065899 | 0.189 | 0.448 | 2.38E-08 |
| DDX3X      | 1.17E-12 | 0.417834135  | 0.73  | 0.638 | 2.56E-08 |
| MRPL34     | 1.24E-12 | -0.26336245  | 0.081 | 0.288 | 2.72E-08 |
| ERP29      | 1.35E-12 | -0.36900606  | 0.501 | 0.763 | 2.95E-08 |
| MBNL1      | 1.38E-12 | -0.392486064 | 0.47  | 0.745 | 3.01E-08 |
| KCNE3      | 1.46E-12 | -0.292850357 | 0.107 | 0.326 | 3.19E-08 |
| PRDX1      | 1.50E-12 | -0.298274605 | 0.597 | 0.855 | 3.28E-08 |
| TWF2       | 1.71E-12 | -0.314594664 | 0.337 | 0.629 | 3.72E-08 |
| CRIP1      | 1.73E-12 | -0.432392712 | 0.687 | 0.866 | 3.77E-08 |
| NCF1       | 1.79E-12 | -0.478909772 | 0.267 | 0.531 | 3.91E-08 |
| GPR34      | 1.91E-12 | -0.268730943 | 0.021 | 0.166 | 4.17E-08 |
| SULT1B1    | 1.98E-12 | -0.344482577 | 0.098 | 0.309 | 4.32E-08 |
| NPM1       | 2.01E-12 | -0.368678168 | 0.587 | 0.825 | 4.37E-08 |
| SH3BGRL    | 2.11E-12 | -0.271486356 | 0.671 | 0.896 | 4.60E-08 |
| AC004556.1 | 2.13E-12 | 0.307680327  | 0.143 | 0.003 | 4.65E-08 |
| NPC2       | 2.30E-12 | -0.259153834 | 0.876 | 0.976 | 5.02E-08 |
| TMEM173    | 2.49E-12 | -0.27821512  | 0.124 | 0.353 | 5.42E-08 |
| TLR2       | 2.57E-12 | 0.53456317   | 0.57  | 0.407 | 5.60E-08 |
| TAF12      | 2.57E-12 | -0.253300176 | 0.076 | 0.276 | 5.61E-08 |
| LCP1       | 2.68E-12 | 0.332223678  | 0.909 | 0.905 | 5.85E-08 |
| SDC4       | 2.69E-12 | 0.493936497  | 0.291 | 0.098 | 5.86E-08 |
| CORO1A     | 2.88E-12 | -0.282971985 | 0.814 | 0.938 | 6.29E-08 |
| LETMD1     | 3.27E-12 | -0.25796423  | 0.067 | 0.255 | 7.14E-08 |
| FLOT1      | 3.33E-12 | 0.512771122  | 0.518 | 0.335 | 7.27E-08 |
| CXCR4      | 3.40E-12 | -0.478538474 | 0.432 | 0.653 | 7.41E-08 |

|           |          |              |       |       |          |
|-----------|----------|--------------|-------|-------|----------|
| PSMG2     | 3.63E-12 | -0.289837632 | 0.265 | 0.549 | 7.92E-08 |
| LGALS2    | 3.66E-12 | -0.344781449 | 0.274 | 0.543 | 7.97E-08 |
| IER3      | 3.85E-12 | -0.454862496 | 0.616 | 0.822 | 8.39E-08 |
| CAMK1     | 4.81E-12 | -0.364676252 | 0.1   | 0.303 | 1.05E-07 |
| RNF141    | 4.97E-12 | -0.357810311 | 0.193 | 0.436 | 1.08E-07 |
| HBA2      | 5.53E-12 | -0.856653524 | 0.017 | 0.151 | 1.21E-07 |
| ARL2BP    | 6.38E-12 | -0.263888005 | 0.098 | 0.303 | 1.39E-07 |
| RGL1      | 7.57E-12 | 0.494394678  | 0.282 | 0.095 | 1.65E-07 |
| ATPIF1    | 8.06E-12 | -0.283251481 | 0.258 | 0.528 | 1.76E-07 |
| ATG16L2   | 1.09E-11 | -0.286509939 | 0.153 | 0.386 | 2.37E-07 |
| TXNIP     | 1.10E-11 | -0.495504456 | 0.453 | 0.688 | 2.40E-07 |
| EIF3G     | 1.12E-11 | -0.305085222 | 0.508 | 0.766 | 2.44E-07 |
| GDI2      | 1.45E-11 | -0.336286827 | 0.566 | 0.813 | 3.16E-07 |
| LMNA      | 1.49E-11 | -0.318953994 | 0.16  | 0.386 | 3.25E-07 |
| GPX4      | 1.53E-11 | -0.270626767 | 0.716 | 0.914 | 3.35E-07 |
| MAT2B     | 1.58E-11 | -0.295539477 | 0.174 | 0.415 | 3.44E-07 |
| SDCBP     | 1.59E-11 | 0.325495486  | 0.933 | 0.914 | 3.46E-07 |
| TFRC      | 1.68E-11 | 0.564708456  | 0.401 | 0.208 | 3.66E-07 |
| GIMAP4    | 1.69E-11 | -0.349653219 | 0.191 | 0.424 | 3.68E-07 |
| ZFAS1     | 1.73E-11 | -0.30786593  | 0.764 | 0.908 | 3.76E-07 |
| MEF2C     | 2.67E-11 | -0.285581258 | 0.208 | 0.457 | 5.83E-07 |
| ADRB2     | 2.78E-11 | -0.250200274 | 0.05  | 0.214 | 6.06E-07 |
| EIF3F     | 3.05E-11 | -0.292212128 | 0.647 | 0.858 | 6.66E-07 |
| C14orf166 | 3.09E-11 | -0.339502056 | 0.432 | 0.682 | 6.73E-07 |
| CHCHD10   | 3.17E-11 | -0.341851873 | 0.308 | 0.579 | 6.92E-07 |
| CLEC4E    | 3.19E-11 | -0.313722654 | 0.566 | 0.831 | 6.95E-07 |
| DDX21     | 3.64E-11 | 0.455901834  | 0.666 | 0.564 | 7.94E-07 |
| SSR3      | 3.78E-11 | -0.311453188 | 0.351 | 0.626 | 8.25E-07 |
| PTGER4    | 3.81E-11 | -0.300363415 | 0.062 | 0.228 | 8.31E-07 |
| PDK4      | 3.86E-11 | -0.415143187 | 0.093 | 0.285 | 8.41E-07 |
| ARF6      | 4.14E-11 | 0.43956975   | 0.513 | 0.335 | 9.03E-07 |
| LYSMD2    | 4.31E-11 | -0.280284618 | 0.105 | 0.306 | 9.41E-07 |
| CD163     | 4.49E-11 | 0.335670281  | 0.945 | 0.944 | 9.80E-07 |
| PRAM1     | 4.87E-11 | -0.270978732 | 0.158 | 0.383 | 1.06E-06 |
| RPS4Y1    | 4.91E-11 | -0.2936635   | 0.711 | 0.884 | 1.07E-06 |
| SNHG7     | 5.42E-11 | -0.274512407 | 0.148 | 0.365 | 1.18E-06 |
| NKG7      | 5.79E-11 | 0.654292884  | 0.418 | 0.246 | 1.26E-06 |
| CORO1B    | 5.88E-11 | -0.322752006 | 0.203 | 0.433 | 1.28E-06 |
| IGKV2-24  | 5.93E-11 | -0.317168435 | 0.043 | 0.193 | 1.29E-06 |
| CD302     | 6.03E-11 | -0.302744213 | 0.621 | 0.858 | 1.31E-06 |
| HEBP1     | 6.47E-11 | -0.258577376 | 0.131 | 0.344 | 1.41E-06 |
| PTPN1     | 7.25E-11 | 0.445629231  | 0.415 | 0.237 | 1.58E-06 |
| MRPL51    | 8.47E-11 | -0.285977941 | 0.236 | 0.49  | 1.85E-06 |
| UBL7      | 9.16E-11 | -0.259222664 | 0.086 | 0.267 | 2.00E-06 |
| SUB1      | 9.74E-11 | 0.334478441  | 0.864 | 0.855 | 2.13E-06 |
| BACH1     | 9.85E-11 | 0.520452479  | 0.544 | 0.398 | 2.15E-06 |
| ADM       | 9.96E-11 | 0.537477185  | 0.547 | 0.383 | 2.17E-06 |
| IFITM3    | 1.01E-10 | 0.588441274  | 0.89  | 0.908 | 2.21E-06 |
| GK        | 1.03E-10 | 0.479288769  | 0.68  | 0.546 | 2.24E-06 |
| SNRPC     | 1.07E-10 | -0.260124031 | 0.165 | 0.389 | 2.34E-06 |
| FAM26F    | 1.15E-10 | -0.30659195  | 0.138 | 0.344 | 2.51E-06 |
| CAST      | 1.18E-10 | -0.304740006 | 0.64  | 0.837 | 2.58E-06 |
| SFPQ      | 1.33E-10 | 0.443056398  | 0.668 | 0.567 | 2.90E-06 |
| FGD2      | 1.48E-10 | -0.339541714 | 0.148 | 0.353 | 3.23E-06 |
| CUTA      | 1.51E-10 | -0.265666589 | 0.32  | 0.588 | 3.29E-06 |
| HPGD      | 1.73E-10 | 0.500861551  | 0.248 | 0.083 | 3.77E-06 |
| CEBPB     | 1.83E-10 | 0.438883201  | 0.737 | 0.635 | 3.99E-06 |
| BTG2      | 1.86E-10 | -0.32912434  | 0.224 | 0.457 | 4.05E-06 |
| LSM4      | 2.19E-10 | -0.296319433 | 0.181 | 0.407 | 4.78E-06 |
| ATP5A1    | 2.52E-10 | -0.328191065 | 0.401 | 0.656 | 5.51E-06 |
| ADSS      | 2.53E-10 | -0.25274206  | 0.179 | 0.407 | 5.52E-06 |
| NAGK      | 2.66E-10 | -0.271651572 | 0.179 | 0.398 | 5.81E-06 |
| SNX2      | 2.93E-10 | -0.279047202 | 0.339 | 0.602 | 6.40E-06 |
| MYL12A    | 3.00E-10 | 0.266065754  | 0.952 | 0.944 | 6.53E-06 |
| TNRC6B    | 3.05E-10 | -0.257861756 | 0.103 | 0.297 | 6.65E-06 |
| MGST3     | 3.26E-10 | -0.289035351 | 0.346 | 0.608 | 7.11E-06 |
| ITGA4     | 3.44E-10 | -0.307412853 | 0.241 | 0.475 | 7.51E-06 |
| ABHD5     | 3.46E-10 | -0.291063708 | 0.21  | 0.442 | 7.55E-06 |
| ADK       | 4.54E-10 | -0.256194507 | 0.072 | 0.234 | 9.91E-06 |
| FAM129B   | 5.63E-10 | 0.408033384  | 0.26  | 0.095 | 1.23E-05 |

|             |          |              |       |       |             |
|-------------|----------|--------------|-------|-------|-------------|
| ANKRD28     | 5.76E-10 | 0.459384081  | 0.406 | 0.22  | 1.26E-05    |
| PNP         | 5.82E-10 | 0.474277948  | 0.566 | 0.424 | 1.27E-05    |
| UBXN1       | 6.34E-10 | -0.302144923 | 0.439 | 0.682 | 1.38E-05    |
| MCTP1       | 6.82E-10 | -0.334273636 | 0.286 | 0.54  | 1.49E-05    |
| TNFAIP2     | 6.90E-10 | -0.290332671 | 0.26  | 0.513 | 1.50E-05    |
| RGS19       | 7.54E-10 | -0.257958382 | 0.351 | 0.623 | 1.64E-05    |
| ATP5F1      | 7.68E-10 | -0.259617576 | 0.551 | 0.789 | 1.67E-05    |
| GNG10       | 8.05E-10 | 0.466234132  | 0.621 | 0.528 | 1.76E-05    |
| BAZ1A       | 8.95E-10 | 0.498719906  | 0.609 | 0.481 | 1.95E-05    |
| F13A1       | 9.04E-10 | -0.290601402 | 0.181 | 0.386 | 1.97E-05    |
| LILRA2      | 9.43E-10 | -0.250624827 | 0.327 | 0.596 | 2.06E-05    |
| EVI2A       | 1.01E-09 | -0.250943959 | 0.16  | 0.374 | 2.20E-05    |
| ENO1        | 1.04E-09 | 0.315111665  | 0.859 | 0.831 | 2.27E-05    |
| IFNGR2      | 1.05E-09 | 0.447591141  | 0.68  | 0.596 | 2.28E-05    |
| RNF130      | 1.05E-09 | -0.281075661 | 0.64  | 0.837 | 2.28E-05    |
| EIF3H       | 1.13E-09 | -0.265755234 | 0.625 | 0.804 | 2.46E-05    |
| PEBP1       | 1.15E-09 | -0.263960125 | 0.11  | 0.288 | 2.50E-05    |
| SH3BP5      | 1.33E-09 | 0.405848703  | 0.413 | 0.246 | 2.90E-05    |
| NPL         | 1.39E-09 | -0.273944046 | 0.208 | 0.445 | 3.03E-05    |
| YWHAZ       | 1.41E-09 | 0.272083541  | 0.878 | 0.887 | 3.08E-05    |
| CLEC5A      | 1.49E-09 | 0.31881133   | 0.141 | 0.018 | 3.24E-05    |
| PPP1CC      | 1.52E-09 | -0.284984783 | 0.317 | 0.564 | 3.32E-05    |
| AHNAK       | 1.59E-09 | -0.325153389 | 0.623 | 0.831 | 3.47E-05    |
| FCGR1B      | 1.61E-09 | 0.478945422  | 0.356 | 0.193 | 3.51E-05    |
| PSMB9       | 1.61E-09 | -0.26104544  | 0.317 | 0.579 | 3.51E-05    |
| RGS2        | 1.65E-09 | -0.419229125 | 0.692 | 0.816 | 3.60E-05    |
| TUFM        | 2.01E-09 | -0.292951813 | 0.358 | 0.611 | 4.39E-05    |
| METTL7B     | 2.11E-09 | 0.369203635  | 0.155 | 0.027 | 4.61E-05    |
| DAD1        | 2.13E-09 | -0.281723683 | 0.401 | 0.656 | 4.63E-05    |
| RNASE1      | 2.22E-09 | -0.718411688 | 0.126 | 0.294 | 4.83E-05    |
| DRAM2       | 2.24E-09 | -0.260833945 | 0.258 | 0.499 | 4.89E-05    |
| ARL6IP5     | 2.38E-09 | -0.256048952 | 0.499 | 0.76  | 5.18E-05    |
| CPPED1      | 2.63E-09 | -0.280054631 | 0.286 | 0.522 | 5.75E-05    |
| SH3GLB1     | 2.68E-09 | 0.486955034  | 0.566 | 0.466 | 5.85E-05    |
| CNIH4       | 2.76E-09 | 0.444229925  | 0.592 | 0.478 | 6.02E-05    |
| MIR4435-2HG | 2.98E-09 | 0.508364491  | 0.456 | 0.312 | 6.50E-05    |
| MAN2B1      | 3.18E-09 | -0.251033592 | 0.31  | 0.552 | 6.93E-05    |
| CD83        | 3.87E-09 | -0.299008222 | 0.468 | 0.697 | 8.44E-05    |
| HRH2        | 3.94E-09 | 0.410230163  | 0.42  | 0.255 | 8.59E-05    |
| LINC00936   | 3.97E-09 | -0.313319561 | 0.399 | 0.635 | 8.65E-05    |
| NDFIP1      | 4.23E-09 | -0.281149854 | 0.346 | 0.576 | 9.23E-05    |
| NDUFB5      | 4.61E-09 | -0.265516943 | 0.317 | 0.564 | 0.000100615 |
| TMEM167A    | 5.31E-09 | 0.392429283  | 0.702 | 0.623 | 0.000115833 |
| S100P       | 5.66E-09 | 0.440689543  | 0.15  | 0.027 | 0.000123509 |
| UQCR10      | 6.00E-09 | -0.281215685 | 0.616 | 0.828 | 0.000130879 |
| SLC11A1     | 6.33E-09 | 0.382897843  | 0.819 | 0.813 | 0.000138108 |
| SNHG8       | 6.71E-09 | -0.256304857 | 0.339 | 0.588 | 0.000146422 |
| ZFAND5      | 6.78E-09 | -0.362742585 | 0.718 | 0.819 | 0.000147895 |
| METRNL      | 7.01E-09 | 0.372752673  | 0.315 | 0.151 | 0.000152881 |
| TBXAS1      | 7.13E-09 | -0.267441695 | 0.48  | 0.742 | 0.000155433 |
| TMEM256     | 7.25E-09 | -0.275914442 | 0.37  | 0.605 | 0.000158011 |
| MRPS24      | 8.87E-09 | -0.270571514 | 0.255 | 0.478 | 0.000193464 |
| PTGS2       | 1.04E-08 | -0.420114959 | 0.186 | 0.374 | 0.000226432 |
| CCL3L3      | 1.12E-08 | -0.556048562 | 0.193 | 0.377 | 0.000243203 |
| LINC00493   | 1.13E-08 | -0.254332846 | 0.298 | 0.537 | 0.000245548 |
| TAGAP       | 1.13E-08 | -0.313842379 | 0.236 | 0.448 | 0.000246002 |
| VAPA        | 1.18E-08 | 0.367585826  | 0.785 | 0.763 | 0.000257155 |
| EIF3L       | 1.31E-08 | -0.250660757 | 0.556 | 0.772 | 0.000286233 |
| PKM         | 1.36E-08 | 0.289739859  | 0.866 | 0.849 | 0.000297635 |
| SYF2        | 1.44E-08 | -0.268000174 | 0.382 | 0.62  | 0.000313749 |
| FOS         | 1.48E-08 | -0.327885371 | 0.99  | 0.988 | 0.000322504 |
| LIMS1       | 1.50E-08 | 0.379019526  | 0.683 | 0.585 | 0.000326533 |
| DYSF        | 1.54E-08 | 0.327264406  | 0.234 | 0.086 | 0.000335368 |
| MBOAT7      | 1.64E-08 | 0.403775298  | 0.36  | 0.205 | 0.000357332 |
| CCT8        | 1.75E-08 | -0.257676365 | 0.294 | 0.534 | 0.000380835 |
| INSIG1      | 1.82E-08 | 0.48080318   | 0.604 | 0.51  | 0.000397368 |
| ARHGDI1     | 1.91E-08 | 0.333785898  | 0.692 | 0.62  | 0.00041596  |
| DAZAP2      | 2.10E-08 | 0.292916599  | 0.869 | 0.89  | 0.000457993 |
| CHSY1       | 2.60E-08 | 0.34398371   | 0.289 | 0.136 | 0.000567634 |
| ZNHIT1      | 2.75E-08 | -0.253342498 | 0.332 | 0.564 | 0.000598921 |

|            |          |              |       |       |             |
|------------|----------|--------------|-------|-------|-------------|
| RAB1A      | 2.80E-08 | 0.361630849  | 0.513 | 0.392 | 0.000611197 |
| TMEM219    | 3.06E-08 | -0.25970211  | 0.375 | 0.608 | 0.000666524 |
| PLA2G7     | 3.13E-08 | 0.286980053  | 0.162 | 0.039 | 0.0006828   |
| RHOC       | 3.26E-08 | -0.28234546  | 0.131 | 0.297 | 0.000710464 |
| IFI6       | 3.39E-08 | 0.530415212  | 0.329 | 0.184 | 0.000738762 |
| PGLS       | 3.83E-08 | -0.252740221 | 0.57  | 0.789 | 0.000836088 |
| VNN1       | 3.98E-08 | 0.361549006  | 0.177 | 0.05  | 0.000867767 |
| CTB-61M7.2 | 4.14E-08 | 0.390656299  | 0.284 | 0.134 | 0.000903565 |
| LIMK2      | 4.35E-08 | 0.311821588  | 0.186 | 0.056 | 0.000949394 |
| UBE2J1     | 5.15E-08 | 0.346030071  | 0.656 | 0.576 | 0.001122324 |
| CD44       | 5.52E-08 | 0.302176643  | 0.85  | 0.81  | 0.001203018 |
| RGS10      | 5.63E-08 | -0.262042823 | 0.372 | 0.599 | 0.001228268 |
| PPARG      | 5.97E-08 | 0.385706932  | 0.203 | 0.071 | 0.001302751 |
| BIN1       | 7.38E-08 | 0.300337628  | 0.21  | 0.074 | 0.00160992  |
| BZW1       | 7.58E-08 | 0.351528525  | 0.573 | 0.484 | 0.001653831 |
| UBE2D1     | 8.20E-08 | 0.320875776  | 0.695 | 0.668 | 0.001788472 |
| STEAP4     | 8.28E-08 | 0.253008927  | 0.103 | 0.009 | 0.001806044 |
| PSMA7      | 8.28E-08 | 0.309157493  | 0.771 | 0.748 | 0.00180664  |
| IER2       | 8.54E-08 | -0.289938208 | 0.85  | 0.941 | 0.001861332 |
| NR3C1      | 8.79E-08 | 0.37299521   | 0.437 | 0.288 | 0.001917172 |
| NDUFS7     | 9.49E-08 | -0.260909508 | 0.406 | 0.632 | 0.002070659 |
| RBP7       | 1.01E-07 | -0.26783169  | 0.294 | 0.51  | 0.002212124 |
| CDC42      | 1.07E-07 | 0.339503278  | 0.776 | 0.783 | 0.002333199 |
| PLAUR      | 1.11E-07 | 0.325859323  | 0.928 | 0.878 | 0.002421283 |
| HLA-DRA    | 1.13E-07 | -0.251931328 | 0.94  | 0.976 | 0.00247254  |
| NFKB2      | 1.16E-07 | 0.342124326  | 0.236 | 0.098 | 0.00253098  |
| REEP5      | 1.17E-07 | -0.252092538 | 0.43  | 0.647 | 0.002548598 |
| NCOA4      | 1.30E-07 | -0.269069433 | 0.365 | 0.579 | 0.002828605 |
| PTPN12     | 1.55E-07 | 0.440875011  | 0.387 | 0.258 | 0.003385393 |
| SQLE       | 1.55E-07 | 0.375247498  | 0.241 | 0.107 | 0.003386553 |
| PLIN2      | 1.58E-07 | 0.449759378  | 0.656 | 0.567 | 0.003448407 |
| C12orf57   | 1.74E-07 | -0.273172999 | 0.205 | 0.392 | 0.003802833 |
| BATF       | 1.76E-07 | 0.378132328  | 0.243 | 0.11  | 0.003838339 |
| ADGRE2     | 2.00E-07 | 0.382655355  | 0.432 | 0.291 | 0.004353664 |
| SERPINB2   | 2.01E-07 | 0.512283826  | 0.37  | 0.208 | 0.004393776 |
| RASA2      | 2.08E-07 | 0.349192859  | 0.289 | 0.148 | 0.004545437 |
| EIF4A1     | 2.30E-07 | 0.328999966  | 0.654 | 0.599 | 0.005012619 |
| NDUFS8     | 2.33E-07 | -0.260215527 | 0.296 | 0.501 | 0.005083856 |
| TNFAIP3    | 2.33E-07 | 0.367661459  | 0.723 | 0.626 | 0.005090934 |
| PTK2B      | 2.37E-07 | 0.361258649  | 0.399 | 0.261 | 0.005167173 |
| CCL4L2     | 2.40E-07 | -0.590381887 | 0.143 | 0.291 | 0.005229013 |
| PLIN3      | 2.41E-07 | 0.381521346  | 0.48  | 0.377 | 0.005250736 |
| CFP        | 2.42E-07 | -0.264421706 | 0.695 | 0.852 | 0.00527462  |
| TMEM120A   | 2.76E-07 | 0.378305964  | 0.387 | 0.252 | 0.006024787 |
| SBNO2      | 3.14E-07 | 0.307043271  | 0.184 | 0.065 | 0.006847766 |
| MAP2K1     | 3.21E-07 | 0.386588523  | 0.582 | 0.501 | 0.006998741 |
| DSE        | 3.29E-07 | 0.373711964  | 0.523 | 0.418 | 0.007170198 |
| PPP1CB     | 3.46E-07 | 0.36999974   | 0.547 | 0.469 | 0.007553649 |
| CAPZA1     | 3.55E-07 | 0.337246823  | 0.683 | 0.623 | 0.007741256 |
| JAK3       | 3.92E-07 | 0.282662801  | 0.212 | 0.083 | 0.008550705 |
| CES1       | 4.41E-07 | 0.374116045  | 0.301 | 0.16  | 0.009619586 |
| PTPRE      | 4.53E-07 | 0.332730471  | 0.795 | 0.736 | 0.009879917 |
| BASP1      | 4.72E-07 | 0.442874749  | 0.391 | 0.249 | 0.01029172  |
| BLOC1S1    | 4.73E-07 | 0.335655036  | 0.604 | 0.528 | 0.010315654 |
| ATP13A3    | 5.28E-07 | 0.390249737  | 0.425 | 0.288 | 0.011514613 |
| NDUFA11    | 5.33E-07 | 0.367313561  | 0.554 | 0.466 | 0.011627487 |
| MPHOSPH6   | 5.88E-07 | 0.38940687   | 0.339 | 0.208 | 0.012827793 |
| TXN        | 5.97E-07 | 0.291077458  | 0.74  | 0.724 | 0.013011306 |
| STAT3      | 7.04E-07 | 0.360148557  | 0.451 | 0.335 | 0.015349114 |
| PET100     | 8.48E-07 | 0.323595114  | 0.673 | 0.614 | 0.018494894 |
| CXCL1      | 9.42E-07 | -0.587348778 | 0.079 | 0.196 | 0.020544791 |
| RILPL2     | 9.75E-07 | 0.277832522  | 0.764 | 0.748 | 0.021262278 |
| IL1R1      | 1.01E-06 | 0.309989949  | 0.131 | 0.033 | 0.021945441 |
| KLHL2      | 1.10E-06 | 0.303928931  | 0.227 | 0.101 | 0.023951048 |
| FAM20A     | 1.20E-06 | 0.373316942  | 0.305 | 0.178 | 0.026171289 |
| EMP1       | 1.20E-06 | 0.407414476  | 0.208 | 0.089 | 0.026250301 |
| PLAC8      | 1.24E-06 | 0.443500391  | 0.468 | 0.35  | 0.026982265 |
| LDLR       | 1.41E-06 | 0.370518245  | 0.325 | 0.196 | 0.030773836 |
| FTH1       | 1.47E-06 | 0.2601452    | 1     | 1     | 0.032134873 |
| CCR1       | 1.66E-06 | 0.427957845  | 0.377 | 0.258 | 0.036288536 |

|        |          |             |       |       |             |
|--------|----------|-------------|-------|-------|-------------|
| FAM49B | 1.84E-06 | 0.287480896 | 0.721 | 0.677 | 0.040234892 |
| EFHD2  | 1.94E-06 | 0.343554159 | 0.58  | 0.528 | 0.042208516 |
| SGK1   | 1.96E-06 | 0.325154879 | 0.609 | 0.484 | 0.042647933 |
| PHC2   | 2.16E-06 | 0.392140615 | 0.356 | 0.231 | 0.04709934  |

List of differentially expressed genes of S100A8 TMo in overall stage (PR versus PP)

| gene     | p_val    | avg_logFC    | pct.1 | pct.2 | p_val_adj |
|----------|----------|--------------|-------|-------|-----------|
| VCAN     | 6.66E-37 | 0.905344837  | 0.963 | 0.817 | 1.45E-32  |
| THBS1    | 1.31E-35 | 1.50134048   | 0.873 | 0.495 | 2.85E-31  |
| S100A4   | 1.26E-30 | -0.467337362 | 0.997 | 0.984 | 2.74E-26  |
| SAT1     | 9.00E-29 | 0.716416111  | 0.973 | 0.93  | 1.96E-24  |
| NAMPT    | 7.41E-26 | 0.918853724  | 0.916 | 0.624 | 1.62E-21  |
| SAMSN1   | 1.31E-24 | 0.933459179  | 0.833 | 0.543 | 2.85E-20  |
| DEFA3    | 2.60E-23 | -1.895513427 | 0.03  | 0.371 | 5.68E-19  |
| HLA-DRB5 | 4.12E-23 | -1.018954267 | 0.157 | 0.575 | 8.98E-19  |
| CST3     | 1.93E-22 | -0.54317497  | 0.97  | 0.978 | 4.21E-18  |
| ACSL1    | 1.09E-21 | 1.049575805  | 0.679 | 0.269 | 2.37E-17  |
| RPS13    | 1.35E-21 | -0.395662889 | 0.993 | 1     | 2.94E-17  |
| RPL11    | 2.28E-21 | -0.35315759  | 0.993 | 1     | 4.97E-17  |
| MT-CYB   | 2.55E-21 | 0.642858081  | 0.993 | 0.962 | 5.56E-17  |
| NACA     | 1.15E-20 | -0.494023832 | 0.923 | 0.978 | 2.51E-16  |
| SRGN     | 1.30E-20 | 0.447465844  | 0.997 | 0.984 | 2.84E-16  |
| RPL30    | 2.29E-19 | -0.353615744 | 1     | 1     | 5.00E-15  |
| S100A6   | 2.03E-18 | -0.311356653 | 1     | 1     | 4.42E-14  |
| TRMT6    | 2.67E-18 | 1.086263019  | 0.395 | 0.043 | 5.82E-14  |
| TNFAIP6  | 6.00E-18 | 1.140725663  | 0.545 | 0.156 | 1.31E-13  |
| MT-ND3   | 1.07E-17 | 0.499433249  | 0.993 | 0.946 | 2.33E-13  |
| FPR2     | 1.38E-17 | 0.974584601  | 0.538 | 0.177 | 3.00E-13  |
| RPS29    | 8.35E-17 | 0.66721325   | 0.816 | 0.661 | 1.82E-12  |
| RPL5     | 1.52E-16 | -0.463006443 | 0.839 | 0.946 | 3.31E-12  |
| RPL18    | 2.39E-16 | -0.398603394 | 0.957 | 0.989 | 5.22E-12  |
| SLC39A8  | 2.59E-16 | 1.037103272  | 0.348 | 0.027 | 5.65E-12  |
| RPL14    | 2.60E-16 | -0.419264259 | 0.923 | 0.978 | 5.68E-12  |
| PAG1     | 5.67E-16 | 0.913791646  | 0.565 | 0.215 | 1.24E-11  |
| PABPC1   | 8.42E-16 | -0.509702952 | 0.779 | 0.941 | 1.84E-11  |
| FXYD5    | 5.47E-15 | -0.642546234 | 0.622 | 0.855 | 1.19E-10  |
| MNDA     | 5.93E-15 | -0.627926375 | 0.739 | 0.914 | 1.29E-10  |
| HBB      | 1.18E-14 | -0.751081605 | 0.054 | 0.312 | 2.57E-10  |
| SELL     | 1.44E-14 | 0.705574847  | 0.739 | 0.548 | 3.15E-10  |
| RPL10    | 3.21E-14 | -0.317031545 | 0.99  | 0.995 | 6.99E-10  |
| CD74     | 3.51E-14 | -0.517392309 | 0.856 | 0.935 | 7.66E-10  |
| S100A9   | 3.99E-14 | 0.510944502  | 0.99  | 0.989 | 8.70E-10  |
| GPX1     | 1.17E-13 | 0.670503523  | 0.793 | 0.645 | 2.56E-09  |
| AGFG1    | 1.26E-13 | 0.84456784   | 0.532 | 0.22  | 2.75E-09  |
| RPS7     | 1.29E-13 | -0.300925305 | 0.977 | 0.995 | 2.81E-09  |
| RPL32    | 1.59E-13 | -0.251856117 | 0.99  | 0.995 | 3.47E-09  |
| SLC2A3   | 1.69E-13 | 0.774446604  | 0.699 | 0.446 | 3.69E-09  |
| ETS2     | 1.76E-13 | 0.826194205  | 0.528 | 0.215 | 3.84E-09  |
| RPL29    | 2.96E-13 | -0.354289827 | 0.943 | 0.984 | 6.44E-09  |
| CRIP1    | 3.13E-13 | -0.920474271 | 0.341 | 0.64  | 6.82E-09  |
| SEC11A   | 4.14E-13 | -0.612423593 | 0.455 | 0.742 | 9.03E-09  |
| H3F3B    | 4.37E-13 | 0.425185601  | 0.946 | 0.941 | 9.54E-09  |
| TMSB4X   | 8.70E-13 | -0.293829944 | 0.987 | 1     | 1.90E-08  |
| CKAP4    | 2.93E-12 | 0.735201415  | 0.518 | 0.22  | 6.39E-08  |
| LGALS2   | 3.58E-12 | -0.629588863 | 0.054 | 0.28  | 7.81E-08  |
| RPL19    | 3.83E-12 | -0.277565141 | 0.987 | 0.989 | 8.35E-08  |
| S100A12  | 5.94E-12 | 0.370482141  | 0.973 | 0.925 | 1.30E-07  |
| EVI2B    | 6.37E-12 | -0.630920511 | 0.411 | 0.677 | 1.39E-07  |
| MT-CO1   | 8.41E-12 | 0.31941512   | 1     | 0.989 | 1.83E-07  |
| GAPDH    | 8.45E-12 | -0.270170595 | 0.993 | 1     | 1.84E-07  |
| APLP2    | 9.03E-12 | 0.652131743  | 0.706 | 0.5   | 1.97E-07  |
| SLC25A6  | 9.55E-12 | -0.56179545  | 0.565 | 0.78  | 2.08E-07  |
| STXBP2   | 1.18E-11 | 0.491737255  | 0.876 | 0.694 | 2.57E-07  |
| HP       | 1.31E-11 | 0.761359151  | 0.284 | 0.032 | 2.85E-07  |
| COMMD6   | 1.56E-11 | -0.40392673  | 0.562 | 0.855 | 3.41E-07  |
| RPL35A   | 2.19E-11 | -0.325126255 | 0.94  | 0.989 | 4.77E-07  |
| RAB31    | 3.26E-11 | 0.665049234  | 0.635 | 0.403 | 7.12E-07  |

|          |          |              |       |       |             |
|----------|----------|--------------|-------|-------|-------------|
| ATP5G2   | 3.94E-11 | -0.382820789 | 0.883 | 0.935 | 8.60E-07    |
| UPP1     | 4.55E-11 | 0.725304258  | 0.565 | 0.296 | 9.92E-07    |
| CSTA     | 4.73E-11 | -0.475179959 | 0.783 | 0.919 | 1.03E-06    |
| AQP9     | 4.99E-11 | 0.735873205  | 0.418 | 0.145 | 1.09E-06    |
| PLAC8    | 5.01E-11 | 0.79055861   | 0.552 | 0.306 | 1.09E-06    |
| RPL8     | 5.10E-11 | -0.29486275  | 0.953 | 0.995 | 1.11E-06    |
| AREG     | 5.46E-11 | 0.713266958  | 0.742 | 0.495 | 1.19E-06    |
| VIM      | 6.77E-11 | -0.307040059 | 0.983 | 0.989 | 1.48E-06    |
| NKG7     | 7.08E-11 | 0.801427295  | 0.408 | 0.134 | 1.54E-06    |
| MT-ND4   | 7.69E-11 | 0.313671287  | 0.997 | 0.973 | 1.68E-06    |
| STOM     | 8.02E-11 | 0.759819579  | 0.348 | 0.091 | 1.75E-06    |
| HLA-DQB1 | 9.76E-11 | -0.646749063 | 0.094 | 0.323 | 2.13E-06    |
| RPS3A    | 9.98E-11 | -0.254593439 | 0.987 | 0.984 | 2.18E-06    |
| RPS14    | 1.18E-10 | -0.300542029 | 0.943 | 0.984 | 2.56E-06    |
| RETN     | 1.21E-10 | 1.13206837   | 0.498 | 0.247 | 2.63E-06    |
| CTSS     | 1.61E-10 | -0.387394998 | 0.809 | 0.887 | 3.51E-06    |
| ASPH     | 2.13E-10 | 0.798116144  | 0.388 | 0.134 | 4.64E-06    |
| EEF1A1   | 2.54E-10 | -0.266110021 | 0.993 | 1     | 5.55E-06    |
| NCF1     | 2.56E-10 | -0.625046114 | 0.311 | 0.575 | 5.59E-06    |
| RPL6     | 3.23E-10 | -0.313518252 | 0.94  | 0.984 | 7.05E-06    |
| SLC25A5  | 3.25E-10 | -0.574249487 | 0.418 | 0.677 | 7.09E-06    |
| AP1S2    | 3.79E-10 | -0.521776959 | 0.522 | 0.731 | 8.27E-06    |
| ADAMTS2  | 3.96E-10 | -0.474431614 | 0.05  | 0.242 | 8.64E-06    |
| GPX4     | 4.43E-10 | -0.552865067 | 0.385 | 0.64  | 9.66E-06    |
| LCP1     | 4.57E-10 | 0.434977639  | 0.833 | 0.656 | 9.96E-06    |
| CST7     | 5.59E-10 | 0.826327261  | 0.274 | 0.048 | 1.22E-05    |
| P2RY13   | 6.45E-10 | -0.471438651 | 0.013 | 0.161 | 1.41E-05    |
| ARPC3    | 8.03E-10 | -0.359097857 | 0.819 | 0.914 | 1.75E-05    |
| FAM26F   | 9.05E-10 | -0.454926693 | 0.047 | 0.237 | 1.97E-05    |
| CD52     | 1.35E-09 | -0.587181695 | 0.328 | 0.586 | 2.94E-05    |
| FPR1     | 1.60E-09 | 0.518298772  | 0.749 | 0.575 | 3.48E-05    |
| ERP29    | 1.64E-09 | -0.540382921 | 0.278 | 0.538 | 3.57E-05    |
| IFI30    | 1.78E-09 | 0.520722721  | 0.709 | 0.527 | 3.88E-05    |
| CD63     | 1.89E-09 | 0.563436734  | 0.699 | 0.581 | 4.12E-05    |
| IL1R2    | 2.40E-09 | 0.770512375  | 0.602 | 0.398 | 5.23E-05    |
| TKT      | 2.78E-09 | -0.495358534 | 0.609 | 0.753 | 6.07E-05    |
| C20orf27 | 3.16E-09 | -0.497212468 | 0.14  | 0.371 | 6.89E-05    |
| FAM65B   | 3.21E-09 | 0.624145809  | 0.562 | 0.333 | 7.00E-05    |
| GK5      | 3.23E-09 | 0.669625325  | 0.181 | 0.005 | 7.04E-05    |
| HSD17B11 | 3.32E-09 | -0.519570561 | 0.331 | 0.597 | 7.23E-05    |
| RPL7A    | 4.16E-09 | -0.269361663 | 0.946 | 0.984 | 9.07E-05    |
| RSL1D1   | 4.31E-09 | -0.498677984 | 0.191 | 0.452 | 9.39E-05    |
| HVCN1    | 4.70E-09 | -0.351506437 | 0.01  | 0.14  | 0.000102473 |
| MT-ATP6  | 5.13E-09 | 0.379874996  | 0.987 | 0.952 | 0.000111817 |
| BCL2A1   | 5.28E-09 | 0.399548619  | 0.803 | 0.554 | 0.000115196 |
| HIF1A    | 5.74E-09 | 0.732265944  | 0.465 | 0.22  | 0.000125095 |
| BTF3     | 6.55E-09 | -0.378282588 | 0.819 | 0.909 | 0.000142852 |
| BAZ1A    | 6.59E-09 | 0.625321149  | 0.515 | 0.29  | 0.000143664 |
| LILRA5   | 7.24E-09 | 0.558241177  | 0.706 | 0.532 | 0.000157932 |
| RNASE6   | 7.81E-09 | -0.443922895 | 0.214 | 0.478 | 0.000170266 |
| GCA      | 7.84E-09 | 0.431096722  | 0.843 | 0.796 | 0.000170976 |
| RPL24    | 8.98E-09 | -0.31487601  | 0.903 | 0.952 | 0.000195742 |
| PFKFB3   | 1.00E-08 | 0.685581793  | 0.301 | 0.086 | 0.000218348 |
| TFRC     | 1.25E-08 | 0.683251708  | 0.298 | 0.081 | 0.000272593 |
| VAMP8    | 1.37E-08 | -0.511533116 | 0.365 | 0.602 | 0.000297967 |
| MS4A7    | 1.41E-08 | -0.449356973 | 0.114 | 0.333 | 0.000307513 |
| NOP10    | 1.67E-08 | -0.426094528 | 0.672 | 0.833 | 0.000365004 |
| BCL3     | 1.70E-08 | 0.590832343  | 0.321 | 0.091 | 0.000370562 |
| GLRX     | 1.76E-08 | -0.503914842 | 0.341 | 0.581 | 0.000384019 |
| SLC11A1  | 1.90E-08 | 0.579942486  | 0.682 | 0.516 | 0.000414863 |
| S100P    | 1.98E-08 | 0.707525641  | 0.268 | 0.059 | 0.000431024 |
| RPL37A   | 2.47E-08 | 0.399076927  | 0.893 | 0.796 | 0.000539421 |
| SLA      | 2.63E-08 | 0.629699193  | 0.441 | 0.22  | 0.000572525 |
| TPM3     | 2.85E-08 | 0.45170458   | 0.776 | 0.629 | 0.000621888 |
| BLVRB    | 2.90E-08 | -0.533380841 | 0.368 | 0.602 | 0.000633372 |
| ATP1A1   | 2.94E-08 | 0.615799406  | 0.334 | 0.118 | 0.000641823 |
| MARCKS   | 3.77E-08 | 0.822751146  | 0.308 | 0.102 | 0.000823173 |
| TYMP     | 4.68E-08 | 0.444280659  | 0.709 | 0.473 | 0.001021148 |
| TNFAIP3  | 6.15E-08 | 0.625521896  | 0.559 | 0.328 | 0.001341176 |
| RUNX1    | 6.37E-08 | 0.55111689   | 0.395 | 0.167 | 0.001390175 |

|            |          |              |       |       |             |
|------------|----------|--------------|-------|-------|-------------|
| HBA2       | 7.39E-08 | -0.424282523 | 0.01  | 0.124 | 0.001610909 |
| RPS27      | 7.63E-08 | 0.266247165  | 0.983 | 0.952 | 0.001664812 |
| LITAF      | 7.85E-08 | 0.633684748  | 0.548 | 0.323 | 0.001711286 |
| CD36       | 9.13E-08 | 0.672463979  | 0.405 | 0.194 | 0.001990826 |
| MAFB       | 9.25E-08 | 0.581838621  | 0.632 | 0.457 | 0.002016713 |
| AIF1       | 1.00E-07 | -0.392543901 | 0.866 | 0.93  | 0.002181358 |
| SH3BP5     | 1.06E-07 | 0.670722905  | 0.278 | 0.086 | 0.00232086  |
| SLC40A1    | 1.14E-07 | -0.378055528 | 0.013 | 0.129 | 0.00249594  |
| RILPL2     | 1.17E-07 | 0.565203448  | 0.559 | 0.36  | 0.002554046 |
| CD14       | 1.21E-07 | 0.573249726  | 0.672 | 0.522 | 0.002630554 |
| C12orf57   | 1.26E-07 | -0.625038603 | 0.104 | 0.29  | 0.002739274 |
| LRG1       | 1.46E-07 | 0.471024544  | 0.204 | 0.032 | 0.003175835 |
| SULT1A1    | 1.61E-07 | -0.378806047 | 0.127 | 0.333 | 0.003503492 |
| PHB2       | 2.14E-07 | -0.379324834 | 0.151 | 0.36  | 0.004661027 |
| CD99       | 2.19E-07 | -0.497344296 | 0.431 | 0.656 | 0.004766687 |
| HLA-DPA1   | 2.24E-07 | -0.554302398 | 0.211 | 0.425 | 0.00488694  |
| GABARAP    | 2.36E-07 | -0.277131281 | 0.903 | 0.968 | 0.005143816 |
| PLD3       | 2.60E-07 | -0.43039801  | 0.117 | 0.306 | 0.005672329 |
| CFL1       | 2.88E-07 | 0.29093303   | 0.94  | 0.903 | 0.006273487 |
| CD44       | 2.88E-07 | 0.449577374  | 0.639 | 0.435 | 0.006278139 |
| FGL2       | 2.99E-07 | -0.465310475 | 0.274 | 0.511 | 0.006512401 |
| B4GALT5    | 3.17E-07 | 0.612157061  | 0.271 | 0.086 | 0.006915158 |
| PGAM1      | 3.27E-07 | 0.462822355  | 0.609 | 0.446 | 0.00712726  |
| TPM4       | 3.35E-07 | 0.638725952  | 0.512 | 0.333 | 0.0073079   |
| CCPG1      | 3.35E-07 | -0.38547978  | 0.134 | 0.333 | 0.007311601 |
| SOD2       | 3.52E-07 | 0.44598494   | 0.789 | 0.608 | 0.007666513 |
| RBMS1      | 4.50E-07 | 0.630253055  | 0.441 | 0.237 | 0.009824208 |
| ACTR2      | 4.85E-07 | 0.502336089  | 0.619 | 0.489 | 0.010585751 |
| ABTB1      | 5.34E-07 | -0.368248927 | 0.064 | 0.22  | 0.011648305 |
| ADM        | 5.43E-07 | 0.622856921  | 0.361 | 0.161 | 0.011833129 |
| SNHG8      | 5.84E-07 | -0.469824679 | 0.137 | 0.328 | 0.012744591 |
| FAM96A     | 6.29E-07 | -0.397972927 | 0.14  | 0.333 | 0.013712659 |
| LIMD2      | 6.33E-07 | -0.522682979 | 0.258 | 0.462 | 0.013804454 |
| KLF6       | 6.52E-07 | 0.398743566  | 0.756 | 0.624 | 0.014210189 |
| CNIH4      | 6.67E-07 | 0.550918737  | 0.505 | 0.306 | 0.014537097 |
| CUTA       | 7.64E-07 | -0.458441236 | 0.207 | 0.414 | 0.01666395  |
| GNAQ       | 7.83E-07 | 0.560742824  | 0.418 | 0.22  | 0.017073583 |
| RNASET2    | 8.48E-07 | -0.466852038 | 0.271 | 0.484 | 0.018491144 |
| NUP214     | 8.72E-07 | -0.452846832 | 0.211 | 0.419 | 0.019015449 |
| RPL17      | 1.00E-06 | -0.282065195 | 0.87  | 0.946 | 0.021884117 |
| FCER1G     | 1.13E-06 | 0.292068447  | 0.99  | 0.973 | 0.024611613 |
| CYP1B1     | 1.13E-06 | 0.669642315  | 0.391 | 0.204 | 0.024699785 |
| GNB2L1     | 1.15E-06 | -0.26914497  | 0.863 | 0.903 | 0.02506724  |
| SH3BGRL    | 1.18E-06 | -0.42194136  | 0.405 | 0.645 | 0.025706337 |
| SPCS1      | 1.60E-06 | -0.390783101 | 0.361 | 0.581 | 0.034920945 |
| OAS1       | 1.66E-06 | -0.291201542 | 0.03  | 0.151 | 0.036187433 |
| IGSF6      | 1.74E-06 | -0.484364422 | 0.241 | 0.435 | 0.037893708 |
| GRINA      | 1.82E-06 | 0.446267005  | 0.652 | 0.478 | 0.039734469 |
| AC004556.1 | 1.94E-06 | 0.361738786  | 0.114 | 0     | 0.042362855 |
| CLEC5A     | 1.97E-06 | 0.383987112  | 0.127 | 0.005 | 0.043004898 |
| MXD1       | 1.99E-06 | 0.548229508  | 0.438 | 0.253 | 0.043315483 |
| IGKV2-24   | 2.00E-06 | -0.431314619 | 0.027 | 0.14  | 0.043644857 |
| HBEGF      | 2.12E-06 | 0.542085853  | 0.308 | 0.124 | 0.04617982  |
| NEAT1      | 2.17E-06 | 0.295300535  | 0.963 | 0.946 | 0.047372298 |
| GOS2       | 2.27E-06 | 0.610831497  | 0.348 | 0.151 | 0.049562523 |
| IL18       | 2.40E-06 | -0.318770715 | 0.057 | 0.199 | 0.052314443 |
| CD37       | 2.99E-06 | -0.394535743 | 0.518 | 0.704 | 0.065308491 |
| PTPN12     | 3.11E-06 | 0.451981094  | 0.298 | 0.113 | 0.067784923 |
| DDX21      | 3.43E-06 | 0.570481646  | 0.508 | 0.349 | 0.074800351 |
| HSP90AA1   | 3.46E-06 | 0.754277921  | 0.625 | 0.425 | 0.075433304 |
| POMP       | 3.50E-06 | 0.452895236  | 0.699 | 0.532 | 0.076311996 |
| TMEM141    | 3.54E-06 | -0.34387588  | 0.047 | 0.177 | 0.077100019 |
| F5         | 4.17E-06 | 0.471231913  | 0.217 | 0.065 | 0.090837455 |
| PRCP       | 4.38E-06 | -0.32075117  | 0.07  | 0.215 | 0.095495769 |
| STX10      | 4.78E-06 | -0.423229881 | 0.167 | 0.349 | 0.104192523 |
| ELOVL1     | 4.83E-06 | -0.272411572 | 0.043 | 0.167 | 0.105402846 |
| SERP1      | 5.03E-06 | -0.346752432 | 0.732 | 0.833 | 0.109597547 |
| RGS2       | 5.35E-06 | -0.465538762 | 0.538 | 0.688 | 0.116571127 |
| PSTPIP2    | 5.41E-06 | 0.521945002  | 0.221 | 0.065 | 0.118046319 |
| RCS1       | 5.92E-06 | -0.368860722 | 0.117 | 0.28  | 0.129147115 |

|           |          |              |       |       |             |
|-----------|----------|--------------|-------|-------|-------------|
| AGTRAP    | 6.15E-06 | -0.457806108 | 0.435 | 0.624 | 0.134076063 |
| RBM47     | 6.42E-06 | 0.595459717  | 0.371 | 0.204 | 0.140001899 |
| FAM200B   | 6.69E-06 | -0.417149276 | 0.197 | 0.387 | 0.145926044 |
| LSM4      | 6.71E-06 | -0.355085644 | 0.074 | 0.215 | 0.146240888 |
| ANG       | 6.92E-06 | -0.318008015 | 0.02  | 0.118 | 0.150959732 |
| LINC00116 | 7.00E-06 | -0.346159891 | 0.08  | 0.226 | 0.152618736 |
| METTL7B   | 7.02E-06 | 0.379841183  | 0.137 | 0.016 | 0.153155397 |
| MGST3     | 7.18E-06 | -0.360820275 | 0.244 | 0.446 | 0.156637705 |
| SARAF     | 7.57E-06 | -0.39602371  | 0.318 | 0.516 | 0.16515817  |
| FKBP5     | 7.96E-06 | 0.474084239  | 0.532 | 0.36  | 0.173561238 |
| ZEB2      | 8.15E-06 | 0.402956278  | 0.712 | 0.586 | 0.177746222 |
| NPC2      | 8.24E-06 | -0.261181028 | 0.565 | 0.769 | 0.179800846 |
| TSC22D3   | 8.27E-06 | 0.434009728  | 0.726 | 0.608 | 0.180366974 |
| EIF3M     | 8.55E-06 | -0.419823572 | 0.331 | 0.527 | 0.186478938 |
| VNN1      | 8.70E-06 | 0.470033122  | 0.164 | 0.032 | 0.18963555  |
| SLC25A37  | 8.72E-06 | 0.515221237  | 0.408 | 0.226 | 0.190185889 |
| SERPINB1  | 8.93E-06 | 0.280917988  | 0.91  | 0.849 | 0.194753859 |
| IL1RAP    | 9.23E-06 | 0.582300115  | 0.217 | 0.07  | 0.201210819 |
| FERMT3    | 9.23E-06 | 0.513269752  | 0.435 | 0.263 | 0.201391184 |
| GIMAP7    | 9.52E-06 | -0.340805796 | 0.087 | 0.231 | 0.207557279 |
| CDC42     | 9.65E-06 | 0.372808774  | 0.652 | 0.538 | 0.210498034 |
| CDA       | 9.73E-06 | -0.364283022 | 0.371 | 0.575 | 0.212271922 |
| SERPINB9  | 9.82E-06 | 0.539281528  | 0.278 | 0.113 | 0.214249435 |
| LDHB      | 9.94E-06 | -0.340084209 | 0.161 | 0.339 | 0.216721283 |
| PHC2      | 1.03E-05 | 0.562436207  | 0.304 | 0.14  | 0.224779405 |
| FCGR1A    | 1.04E-05 | 0.603181576  | 0.408 | 0.237 | 0.226440002 |
| IFITM2    | 1.08E-05 | 0.353667233  | 0.913 | 0.866 | 0.235805703 |
| EEF1D     | 1.10E-05 | -0.254148011 | 0.866 | 0.93  | 0.239109998 |
| MTHFD2    | 1.14E-05 | 0.455809126  | 0.291 | 0.124 | 0.249227938 |
| MPST      | 1.14E-05 | -0.370759733 | 0.067 | 0.199 | 0.24940018  |
| ROMO1     | 1.16E-05 | 0.444329707  | 0.559 | 0.398 | 0.253117906 |
| PYCARD    | 1.22E-05 | -0.366758473 | 0.579 | 0.71  | 0.266842651 |
| IMPDH1    | 1.23E-05 | -0.366171137 | 0.12  | 0.28  | 0.267360865 |
| ATG16L2   | 1.33E-05 | -0.319282879 | 0.064 | 0.194 | 0.289776009 |
| CCND3     | 1.37E-05 | 0.480241754  | 0.488 | 0.349 | 0.299513497 |
| MS4A4A    | 1.44E-05 | 0.516232534  | 0.284 | 0.124 | 0.313058989 |
| GIMAP2    | 1.45E-05 | -0.27631644  | 0.05  | 0.172 | 0.315774699 |
| HIGD2A    | 1.52E-05 | -0.367462904 | 0.482 | 0.651 | 0.332202584 |
| UBE2H     | 1.53E-05 | 0.389966624  | 0.187 | 0.048 | 0.333126077 |
| CD82      | 1.62E-05 | 0.440239752  | 0.201 | 0.059 | 0.352547795 |
| ADGRE2    | 1.62E-05 | 0.504407114  | 0.187 | 0.054 | 0.353604137 |
| SLC27A3   | 1.65E-05 | -0.328383531 | 0.04  | 0.151 | 0.358871523 |
| CBWD2     | 1.66E-05 | -0.266744867 | 0.04  | 0.151 | 0.361144133 |
| CLU       | 1.68E-05 | 0.519091318  | 0.338 | 0.172 | 0.366794163 |
| GLMP      | 1.74E-05 | -0.277010574 | 0.037 | 0.145 | 0.378552281 |
| WDR26     | 1.74E-05 | 0.505892826  | 0.311 | 0.145 | 0.380325816 |
| SDC4      | 1.75E-05 | 0.411838138  | 0.117 | 0.011 | 0.381877701 |
| GIMAP1    | 1.84E-05 | -0.330550131 | 0.097 | 0.242 | 0.401426333 |
| EEF1B2    | 1.86E-05 | -0.301059013 | 0.666 | 0.812 | 0.406636177 |
| LIMK2     | 1.92E-05 | 0.413332122  | 0.137 | 0.022 | 0.418543381 |
| MEAF6     | 1.93E-05 | -0.359967877 | 0.1   | 0.247 | 0.420205664 |
| ANKRD28   | 1.94E-05 | 0.412828831  | 0.227 | 0.075 | 0.422600063 |
| MAP3K8    | 2.00E-05 | 0.553963835  | 0.385 | 0.21  | 0.436778807 |
| SFPQ      | 2.04E-05 | 0.578645661  | 0.438 | 0.29  | 0.444772359 |
| ARL6IP5   | 2.05E-05 | -0.377114954 | 0.278 | 0.484 | 0.44756098  |
| KLF2      | 2.18E-05 | 0.540800859  | 0.328 | 0.167 | 0.475609181 |
| PTPN1     | 2.24E-05 | 0.435650844  | 0.241 | 0.091 | 0.488495776 |
| JAK3      | 2.28E-05 | 0.456266037  | 0.174 | 0.043 | 0.497537296 |

List of differentially expressed genes of IL1B KC in overall stage (PR versus PP)

| gene     | p_val    | avg_logFC   | pct.1 | pct.2 | p_val_adj |
|----------|----------|-------------|-------|-------|-----------|
| NAMPT    | 2.84E-20 | 0.956645755 | 0.973 | 0.888 | 6.19E-16  |
| PIM1     | 3.69E-20 | 1.137578099 | 0.676 | 0.112 | 8.04E-16  |
| HSP90AA1 | 5.37E-19 | 2.030209759 | 0.946 | 0.902 | 1.17E-14  |
| SOD2     | 1.68E-17 | 1.048642265 | 0.986 | 0.916 | 3.67E-13  |
| ACSL1    | 9.65E-16 | 1.058050011 | 0.824 | 0.517 | 2.10E-11  |
| MT2A     | 2.34E-15 | 1.691094484 | 0.959 | 0.881 | 5.10E-11  |



|           |          |              |       |       |             |
|-----------|----------|--------------|-------|-------|-------------|
| SOCS3     | 2.06E-14 | 0.964145864  | 0.851 | 0.58  | 4.49E-10    |
| HSPE1     | 3.11E-14 | 1.834113751  | 0.824 | 0.636 | 6.77E-10    |
| TMSB4X    | 4.34E-14 | -0.522091876 | 0.986 | 1     | 9.46E-10    |
| HSPH1     | 4.86E-14 | 2.170570366  | 0.73  | 0.399 | 1.06E-09    |
| BAG3      | 5.44E-14 | 1.534485882  | 0.486 | 0.07  | 1.19E-09    |
| LITAF     | 8.51E-14 | 1.112342287  | 0.878 | 0.706 | 1.86E-09    |
| THBS1     | 9.39E-14 | 1.645777437  | 0.77  | 0.35  | 2.05E-09    |
| ZFP36L2   | 1.33E-13 | -0.877388154 | 0.554 | 0.965 | 2.91E-09    |
| BATF      | 2.34E-13 | 0.892932815  | 0.473 | 0.063 | 5.11E-09    |
| H3F3B     | 3.48E-13 | 0.631492377  | 1     | 0.993 | 7.58E-09    |
| MIR3945HG | 6.28E-13 | 0.9863389    | 0.459 | 0.063 | 1.37E-08    |
| CTSL      | 8.28E-13 | 1.140879585  | 0.892 | 0.755 | 1.81E-08    |
| B4GALT5   | 9.90E-13 | 0.772659575  | 0.595 | 0.168 | 2.16E-08    |
| AREG      | 1.05E-12 | 1.0629402    | 0.878 | 0.399 | 2.29E-08    |
| CXCR4     | 1.06E-12 | -0.904725104 | 0.5   | 0.874 | 2.31E-08    |
| DSE       | 1.30E-12 | 0.774566675  | 0.703 | 0.28  | 2.84E-08    |
| HSPD1     | 1.62E-12 | 2.122186914  | 0.757 | 0.601 | 3.54E-08    |
| PIM3      | 3.85E-12 | 0.884021104  | 0.662 | 0.266 | 8.39E-08    |
| HSPB1     | 7.34E-12 | 2.171156542  | 0.743 | 0.434 | 1.60E-07    |
| C1orf162  | 1.32E-11 | -0.599876773 | 0.757 | 0.972 | 2.89E-07    |
| DNAJA4    | 2.06E-11 | 1.14396563   | 0.338 | 0.021 | 4.50E-07    |
| HIF1A     | 2.09E-11 | 0.873006858  | 0.743 | 0.427 | 4.55E-07    |
| ITGB2     | 4.47E-11 | -0.561834337 | 0.784 | 0.986 | 9.75E-07    |
| TNIP3     | 4.79E-11 | 1.041100406  | 0.378 | 0.042 | 1.04E-06    |
| GIMAP2    | 6.72E-11 | -0.566015148 | 0.068 | 0.538 | 1.47E-06    |
| EEF1A1    | 7.05E-11 | -0.315868574 | 1     | 1     | 1.54E-06    |
| BCL3      | 9.48E-11 | 0.709557401  | 0.554 | 0.168 | 2.07E-06    |
| MAP3K8    | 1.36E-10 | 0.68334633   | 0.892 | 0.72  | 2.98E-06    |
| HSPA5     | 1.46E-10 | 1.309226711  | 0.811 | 0.545 | 3.19E-06    |
| ATP13A3   | 2.00E-10 | 0.725913286  | 0.527 | 0.147 | 4.36E-06    |
| CALM2     | 2.45E-10 | -0.558187216 | 0.851 | 0.972 | 5.34E-06    |
| GPR65     | 2.87E-10 | -0.63185002  | 0.284 | 0.755 | 6.25E-06    |
| NFKBIZ    | 3.09E-10 | -0.809774365 | 0.541 | 0.867 | 6.74E-06    |
| SLC25A37  | 4.30E-10 | 0.888690395  | 0.581 | 0.238 | 9.37E-06    |
| NFKB2     | 4.38E-10 | 0.723027017  | 0.514 | 0.154 | 9.54E-06    |
| FPR1      | 6.00E-10 | 0.684821804  | 0.838 | 0.727 | 1.31E-05    |
| ABI3      | 6.62E-10 | -0.542068519 | 0.284 | 0.741 | 1.44E-05    |
| NINJ1     | 9.25E-10 | 0.89660126   | 0.878 | 0.804 | 2.02E-05    |
| GOS2      | 9.72E-10 | 1.028771138  | 0.676 | 0.287 | 2.12E-05    |
| GIMAP4    | 1.17E-09 | -0.649171047 | 0.257 | 0.72  | 2.54E-05    |
| GK        | 1.42E-09 | 0.987059874  | 0.676 | 0.378 | 3.10E-05    |
| GLRX      | 1.60E-09 | -0.588070003 | 0.351 | 0.811 | 3.48E-05    |
| NEAT1     | 1.67E-09 | 0.525707998  | 0.986 | 0.986 | 3.64E-05    |
| HSPA1A    | 2.09E-09 | 1.290332716  | 0.851 | 0.783 | 4.56E-05    |
| CORO1A    | 2.49E-09 | -0.513581593 | 0.662 | 0.923 | 5.44E-05    |
| HMGN3     | 2.56E-09 | -0.538258004 | 0.311 | 0.762 | 5.58E-05    |
| TXNIP     | 2.64E-09 | -0.804447392 | 0.514 | 0.86  | 5.75E-05    |
| DEFA3     | 4.67E-09 | -0.626136872 | 0.068 | 0.476 | 0.0001019   |
| RPS29     | 5.26E-09 | 0.445752405  | 0.946 | 0.979 | 0.000114643 |
| GIMAP1    | 6.47E-09 | -0.603396634 | 0.149 | 0.58  | 0.000141066 |
| ARHGDIB   | 8.30E-09 | -0.519653483 | 0.757 | 0.965 | 0.000180919 |
| RELB      | 8.52E-09 | 0.599405537  | 0.527 | 0.196 | 0.000185752 |
| CACYBP    | 1.07E-08 | 0.819199214  | 0.635 | 0.35  | 0.00023259  |
| JUNB      | 1.15E-08 | -0.476336493 | 0.946 | 1     | 0.00024987  |
| CTSS      | 1.73E-08 | -0.354326063 | 0.973 | 0.993 | 0.000377601 |
| MIS18BP1  | 1.75E-08 | -0.511867252 | 0.149 | 0.594 | 0.000380799 |
| HLA-DRB5  | 1.77E-08 | -0.514624421 | 0.851 | 1     | 0.000386922 |
| THBD      | 2.02E-08 | 0.809055288  | 0.473 | 0.154 | 0.000440845 |
| DUSP1     | 2.07E-08 | -0.410213695 | 1     | 1     | 0.000451298 |
| BIN2      | 2.28E-08 | -0.571911907 | 0.27  | 0.699 | 0.00049818  |
| FCGR3A    | 2.34E-08 | -0.404735939 | 0.878 | 0.986 | 0.000510277 |
| HBB       | 2.50E-08 | -0.818816136 | 0.095 | 0.483 | 0.000546258 |
| APBB1IP   | 3.05E-08 | -0.5658268   | 0.324 | 0.748 | 0.000666013 |
| SCIMP     | 5.15E-08 | -0.485007431 | 0.162 | 0.573 | 0.001123069 |
| METTL7A   | 5.28E-08 | -0.454285661 | 0.149 | 0.545 | 0.00115174  |
| IFNGR1    | 5.38E-08 | -0.542562736 | 0.514 | 0.874 | 0.001172934 |
| LILRA2    | 6.01E-08 | -0.568994966 | 0.459 | 0.811 | 0.00131121  |
| CDKN1A    | 6.84E-08 | 0.651410114  | 0.878 | 0.769 | 0.00149167  |
| LRG1      | 7.35E-08 | 0.632726507  | 0.392 | 0.105 | 0.00160265  |
| PELI1     | 7.65E-08 | 0.723314847  | 0.689 | 0.448 | 0.001669173 |

|          |          |              |       |       |             |
|----------|----------|--------------|-------|-------|-------------|
| TKT      | 8.12E-08 | -0.504105307 | 0.716 | 0.965 | 0.001771402 |
| COTL1    | 8.71E-08 | -0.324882365 | 0.973 | 1     | 0.001899192 |
| RHOB     | 9.26E-08 | -0.634973538 | 0.797 | 0.979 | 0.002018439 |
| MEF2C    | 9.88E-08 | -0.523866326 | 0.203 | 0.615 | 0.002153748 |
| PPP1CB   | 1.01E-07 | 0.731078336  | 0.622 | 0.371 | 0.002211785 |
| RPL36A   | 1.28E-07 | 0.410813614  | 0.919 | 0.951 | 0.002791967 |
| PDLIM2   | 1.39E-07 | -0.4711727   | 0.068 | 0.427 | 0.003022271 |
| RGS19    | 1.81E-07 | -0.451288941 | 0.351 | 0.755 | 0.003940081 |
| RPL39    | 1.99E-07 | 0.302614264  | 1     | 0.993 | 0.004343249 |
| C15orf48 | 2.01E-07 | 1.242955545  | 0.338 | 0.077 | 0.00439136  |
| CSK      | 2.29E-07 | -0.501399049 | 0.284 | 0.699 | 0.005004917 |
| SAMSN1   | 2.31E-07 | 0.562368681  | 0.932 | 0.839 | 0.005034503 |
| LIMD2    | 2.49E-07 | -0.437633176 | 0.5   | 0.853 | 0.005432786 |
| UPP1     | 2.92E-07 | 0.674567401  | 0.77  | 0.629 | 0.006372608 |
| HSPB11   | 3.01E-07 | -0.408152638 | 0.041 | 0.371 | 0.006574414 |
| VAMP8    | 3.51E-07 | -0.425639215 | 0.703 | 0.944 | 0.007647516 |
| OTUB1    | 3.65E-07 | -0.449445392 | 0.203 | 0.608 | 0.007958412 |
| IGBP1    | 3.78E-07 | -0.418115294 | 0.162 | 0.545 | 0.008244637 |
| PRAM1    | 4.13E-07 | -0.391385519 | 0.095 | 0.455 | 0.008998288 |
| PVRL2    | 4.46E-07 | 0.639844137  | 0.419 | 0.14  | 0.009725816 |
| GPBAR1   | 4.56E-07 | -0.453843022 | 0.122 | 0.49  | 0.00995084  |
| STX10    | 4.97E-07 | -0.457102517 | 0.243 | 0.615 | 0.01083859  |
| LIMK2    | 5.08E-07 | 0.497438744  | 0.338 | 0.084 | 0.011081382 |
| FCGR1A   | 5.96E-07 | 0.608765989  | 0.649 | 0.413 | 0.012988628 |
| ADRB2    | 6.05E-07 | -0.372445023 | 0     | 0.28  | 0.013184631 |
| CDKN1B   | 8.01E-07 | -0.432725608 | 0.284 | 0.678 | 0.017473445 |
| SULT1B1  | 8.10E-07 | -0.433008578 | 0.095 | 0.441 | 0.017660729 |
| RPL7A    | 8.18E-07 | -0.250527742 | 1     | 1     | 0.017841516 |
| HSP90AB1 | 8.38E-07 | 0.864837351  | 0.919 | 0.874 | 0.018272037 |
| C10orf54 | 8.42E-07 | -0.412698654 | 0.73  | 0.937 | 0.018353378 |
| GIMAP7   | 8.55E-07 | -0.503785276 | 0.081 | 0.413 | 0.018636801 |
| ATPIF1   | 1.20E-06 | -0.366046504 | 0.216 | 0.629 | 0.026131923 |
| PABPC1   | 1.35E-06 | -0.309379858 | 0.986 | 0.986 | 0.029509558 |
| MRPS35   | 1.35E-06 | -0.440036318 | 0.108 | 0.448 | 0.029535549 |
| PTPRC    | 1.50E-06 | -0.386109699 | 0.838 | 1     | 0.03264317  |
| MAP1LC3A | 1.53E-06 | 0.388828907  | 0.176 | 0.007 | 0.033410413 |
| FLI1     | 1.55E-06 | -0.384545151 | 0.189 | 0.545 | 0.033858943 |
| MALAT1   | 1.70E-06 | 0.430294484  | 0.986 | 1     | 0.03707363  |
| LDHA     | 1.86E-06 | 0.412069203  | 0.878 | 0.839 | 0.040661705 |
| IFI30    | 2.11E-06 | 0.661911401  | 0.797 | 0.804 | 0.045908238 |

**Table 6: List of DEGs of mononuclear phagocyte clusters in cold preservation stage (EP versus PP)**

List of differentially expressed genes of C1QC\_KC in cold preservation stage (EP versus PP)

| gene     | p_val    | avg logFC    | pct.1 | pct.2 | p_val adj   |
|----------|----------|--------------|-------|-------|-------------|
| HSP90AA1 | 2.03E-28 | 0.483146606  | 0.943 | 0.874 | 4.43E-24    |
| HSPA1B   | 1.62E-26 | 0.466592419  | 0.816 | 0.534 | 3.53E-22    |
| HSPA1A   | 2.75E-23 | 0.3557401    | 0.908 | 0.748 | 5.99E-19    |
| MT-ATP8  | 1.42E-19 | -0.409727338 | 0.967 | 0.988 | 3.09E-15    |
| IGLV2-14 | 7.25E-19 | 0.387113879  | 0.307 | 0.096 | 1.58E-14    |
| IGLV2-23 | 1.91E-18 | 0.295491767  | 0.162 | 0.017 | 4.16E-14    |
| C1QC     | 5.60E-17 | -0.255719585 | 0.971 | 0.964 | 1.22E-12    |
| HSPH1    | 9.65E-15 | 0.452956781  | 0.547 | 0.355 | 2.10E-10    |
| GPX1     | 3.19E-14 | 0.257773726  | 0.969 | 0.925 | 6.96E-10    |
| RGS1     | 4.43E-10 | 0.362141987  | 0.602 | 0.43  | 9.65E-06    |
| MT2A     | 9.04E-09 | 0.537464027  | 0.818 | 0.755 | 0.000197196 |
| IGKV2-24 | 4.02E-08 | 0.546126276  | 0.062 | 0.171 | 0.000876957 |
| TNF      | 4.95E-08 | -0.530089829 | 0.225 | 0.368 | 0.00108016  |
| MAF      | 6.33E-08 | 0.260658652  | 0.789 | 0.662 | 0.001379688 |
| ADM      | 6.98E-08 | -0.379747894 | 0.35  | 0.491 | 0.001523083 |
| VSIG4    | 7.05E-08 | -0.25567875  | 0.859 | 0.856 | 0.001537931 |
| RSRP1    | 4.77E-07 | -0.306944573 | 0.531 | 0.629 | 0.010391656 |
| FOLR2    | 1.61E-06 | -0.251706387 | 0.805 | 0.862 | 0.035135719 |
| DEFA3    | 1.75E-06 | -0.422008204 | 0.316 | 0.449 | 0.038143692 |

List of differentially expressed genes of VCAN\_TMo in cold preservation stage (EP versus PP)

| gene     | p_val    | avg logFC   | pct.1 | pct.2 | p_val adj   |
|----------|----------|-------------|-------|-------|-------------|
| HSP90AA1 | 1.77E-17 | 0.626540073 | 0.886 | 0.807 | 3.86E-13    |
| MT1E     | 4.36E-15 | 1.059251622 | 0.276 | 0.053 | 9.52E-11    |
| HSPA1B   | 5.75E-15 | 0.537083216 | 0.566 | 0.27  | 1.25E-10    |
| NEAT1    | 3.71E-14 | 0.33534573  | 1     | 0.997 | 8.09E-10    |
| MT1X     | 1.10E-11 | 1.365030606 | 0.518 | 0.306 | 2.41E-07    |
| MT2A     | 1.17E-10 | 1.26720749  | 0.779 | 0.677 | 2.55E-06    |
| KLF6     | 2.52E-10 | 0.39943313  | 0.93  | 0.875 | 5.49E-06    |
| RHOB     | 2.52E-10 | 0.416761513 | 0.857 | 0.721 | 5.49E-06    |
| IGKV2-24 | 1.54E-08 | -0.32431382 | 0.04  | 0.193 | 0.000336168 |
| MT1G     | 1.90E-08 | 1.284259824 | 0.162 | 0.033 | 0.000414592 |
| JUN      | 1.92E-08 | 0.44269514  | 0.688 | 0.528 | 0.000419077 |
| IGLV2-23 | 4.94E-08 | 0.30667244  | 0.14  | 0.024 | 0.001077159 |
| GPX1     | 8.27E-07 | 0.267629066 | 0.919 | 0.923 | 0.018032005 |
| HSPA1A   | 9.21E-07 | 0.419407285 | 0.669 | 0.579 | 0.020086312 |
| IGLV2-14 | 1.49E-06 | 0.326433667 | 0.268 | 0.122 | 0.032475784 |
| HSPH1    | 1.61E-06 | 0.388925484 | 0.379 | 0.214 | 0.035115497 |

List of differentially expressed genes of S100A8\_TMo in cold preservation stage (EP versus PP)

| gene    | p_val    | avg logFC   | pct.1 | pct.2 | p_val adj   |
|---------|----------|-------------|-------|-------|-------------|
| MT1X    | 1.91E-08 | 0.837855545 | 0.453 | 0.226 | 0.000415617 |
| JUN     | 6.61E-08 | 0.685201364 | 0.575 | 0.328 | 0.001440706 |
| MT-ND3  | 7.97E-08 | 0.289453663 | 0.972 | 0.946 | 0.001737612 |
| MT2A    | 5.39E-07 | 0.831379914 | 0.597 | 0.414 | 0.011745676 |
| MT-ATP6 | 6.24E-07 | 0.337488221 | 0.961 | 0.952 | 0.013613524 |
| NEAT1   | 8.18E-07 | 0.305036912 | 0.956 | 0.946 | 0.017841712 |

List of differentially expressed genes of IL1B\_KC in cold preservation stage (EP versus PP)

| gene     | p_val    | avg logFC   | pct.1 | pct.2 | p_val adj   |
|----------|----------|-------------|-------|-------|-------------|
| NEAT1    | 3.12E-10 | 0.439661833 | 1     | 0.986 | 6.80E-06    |
| HSP90AA1 | 3.80E-10 | 0.62608012  | 0.942 | 0.902 | 8.29E-06    |
| HSPA1B   | 1.85E-09 | 0.48504073  | 0.783 | 0.434 | 4.03E-05    |
| IGLV2-14 | 2.18E-08 | 0.647393245 | 0.342 | 0.077 | 0.000475729 |
| HSPA1A   | 1.15E-06 | 0.282257263 | 0.917 | 0.783 | 0.025068005 |
| IGLV2-23 | 1.58E-06 | 0.284329332 | 0.183 | 0.014 | 0.034477496 |

**Table 7. List of markers information for bulk RNA sequencing data from 14 EP-PR pairs of donor liver sample**

| ID              | log2FoldChange | pvalue      | padj        | gene_name  |
|-----------------|----------------|-------------|-------------|------------|
| ENSG00000227300 | 9.732648439    | 6.24E-18    | 4.05E-15    | KRT16P2    |
| ENSG00000108342 | 9.575885426    | 2.14E-23    | 3.47E-20    | CSF3       |
| ENSG00000136244 | 6.933343394    | 1.06E-18    | 8.07E-16    | IL6        |
| ENSG00000267607 | 6.901879081    | 2.06E-18    | 1.53E-15    | AC011511.5 |
| ENSG00000126583 | 6.741541442    | 6.71E-13    | 1.50E-10    | PRKCG      |
| ENSG00000204614 | 6.598034068    | 6.39E-08    | 4.22E-06    | TRIM40     |
| ENSG00000196611 | 6.535225305    | 1.04E-08    | 9.00E-07    | MMP1       |
| ENSG00000135625 | 6.370841279    | 1.05E-14    | 3.77E-12    | EGR4       |
| ENSG00000168334 | 6.304738312    | 5.41E-14    | 1.56E-11    | XIRP1      |
| ENSG00000175592 | 6.08766392     | 6.95E-27    | 3.61E-23    | FOSL1      |
| ENSG00000197632 | 6.021238854    | 3.00E-11    | 4.66E-09    | SERPINB2   |
| ENSG00000119508 | 5.94494471     | 7.40E-26    | 2.13E-22    | NR4A3      |
| ENSG00000173110 | 5.838250319    | 4.60E-26    | 1.71E-22    | HSPA6      |
| ENSG00000128342 | 5.810316714    | 2.15E-17    | 1.27E-14    | LIF        |
| ENSG00000121742 | 5.77201028     | 6.22E-11    | 8.87E-09    | GJB6       |
| ENSG00000198576 | 5.770874933    | 5.49E-20    | 5.48E-17    | ARC        |
| ENSG00000240457 | 5.763222465    | 3.56E-09    | 3.40E-07    | RN7SL472P  |
| ENSG00000115009 | 5.645891491    | 4.71E-15    | 1.82E-12    | CCL20      |
| ENSG00000100341 | 5.583686824    | 5.20E-07    | 2.63E-05    | PNPLA5     |
| ENSG00000204388 | 5.536284961    | 2.07E-32    | 2.69E-28    | HSPA1B     |
| ENSG00000170961 | 5.37593242     | 4.24E-15    | 1.69E-12    | HAS2       |
| ENSG00000169429 | 5.354942353    | 8.01E-18    | 4.95E-15    | CXCL8      |
| ENSG00000188886 | 5.298981141    | 4.74E-12    | 8.99E-10    | ASTL       |
| ENSG00000179148 | 5.233843526    | 5.84E-10    | 6.61E-08    | ALOXE3     |
| ENSG00000161270 | 5.135854858    | 8.62E-07    | 4.12E-05    | NPHS1      |
| ENSG00000108688 | 5.124242909    | 1.23E-07    | 7.38E-06    | CCL7       |
| ENSG00000125740 | 5.107727442    | 2.49E-12    | 4.93E-10    | FOSB       |
| ENSG00000105509 | 5.072848935    | 2.43E-19    | 2.10E-16    | HAS1       |
| ENSG00000187658 | 5.052136358    | 4.69E-07    | 2.41E-05    | C5orf52    |
| ENSG00000267195 | 5.049603396    | 3.30E-14    | 1.02E-11    | MIR212     |
| ENSG00000204389 | 5.028372576    | 1.00E-32    | 2.61E-28    | HSPA1A     |
| ENSG00000123610 | 5.011379554    | 3.38E-15    | 1.37E-12    | TNFAIP6    |
| ENSG00000073756 | 4.96058298     | 1.04E-23    | 1.79E-20    | PTGS2      |
| ENSG00000207980 | 4.936636559    | 5.18E-08    | 3.58E-06    | MIR23A     |
| ENSG00000223086 | 4.838930764    | 1.63E-07    | 9.46E-06    | RNA5SP155  |
| ENSG00000268812 | 4.824736249    | 2.81E-08    | 2.16E-06    | AC004264.1 |
| ENSG00000115008 | 4.766861284    | 2.64E-09    | 2.60E-07    | IL1A       |
| ENSG00000166670 | 4.747542003    | 1.38E-06    | 6.17E-05    | MMP10      |
| ENSG00000259285 | 4.710169109    | 1.37E-09    | 1.44E-07    | AC025431.1 |
| ENSG00000158859 | 4.701448052    | 7.43E-17    | 4.01E-14    | ADAMTS4    |
| ENSG00000173391 | 4.698885047    | 1.47E-12    | 3.09E-10    | OLR1       |
| ENSG00000179388 | 4.659931863    | 8.47E-20    | 7.85E-17    | EGR3       |
| ENSG00000185897 | 4.637074771    | 2.61E-14    | 8.47E-12    | FFAR3      |
| ENSG00000124882 | 4.621378475    | 5.11E-11    | 7.49E-09    | EREG       |
| ENSG00000224959 | 4.609414837    | 1.22E-08    | 1.04E-06    | AC017002.1 |
| ENSG00000069482 | 4.606064334    | 3.01E-06    | 0.000123077 | GAL        |
| ENSG00000218809 | 4.591291265    | 7.85E-06    | 0.000281475 | AL391903.1 |
| ENSG00000148677 | 4.543175008    | 8.80E-08    | 5.55E-06    | ANKRD1     |
| ENSG00000268734 | 4.530656994    | 6.35E-14    | 1.73E-11    | AC245128.3 |
| ENSG00000109321 | 4.517174592    | 7.42E-09    | 6.54E-07    | AREG       |
| ENSG00000122877 | 4.458699826    | 8.39E-22    | 1.04E-18    | EGR2       |
| ENSG00000102794 | 4.42757525     | 0.000342595 | 0.006198724 | ACOD1      |
| ENSG00000179674 | 4.394772889    | 4.72E-06    | 0.000181941 | ARL14      |
| ENSG00000182782 | 4.387370113    | 5.64E-15    | 2.15E-12    | HCAR2      |
| ENSG00000049249 | 4.378555452    | 1.61E-15    | 6.97E-13    | TNFRSF9    |
| ENSG00000255434 | 4.36033708     | 3.65E-06    | 0.000145882 | AP001922.6 |
| ENSG00000149968 | 4.350079128    | 0.002192651 | 0.026001157 | MMP3       |
| ENSG00000099985 | 4.290880608    | 7.25E-13    | 1.57E-10    | OSM        |
| ENSG00000189410 | 4.274937649    | 3.87E-06    | 0.00015312  | SH2D5      |
| ENSG00000140403 | 4.263114819    | 3.42E-28    | 2.22E-24    | DNAJA4     |
| ENSG00000230928 | 4.262409941    | 8.68E-07    | 4.13E-05    | AL139241.1 |
| ENSG00000182950 | 4.258722983    | 3.20E-14    | 9.99E-12    | ODF3L1     |
| ENSG00000125538 | 4.246658318    | 4.33E-14    | 1.26E-11    | IL1B       |
| ENSG00000176887 | 4.236633224    | 0.0001242   | 0.002782815 | SOX11      |
| ENSG00000013588 | 4.231454379    | 3.45E-14    | 1.04E-11    | GPRC5A     |
| ENSG00000261257 | 4.216430933    | 0.001011376 | 0.014529984 | AP000821.1 |
| ENSG00000175793 | 4.215707396    | 3.20E-08    | 2.38E-06    | SFN        |
| ENSG00000162772 | 4.199053375    | 1.45E-26    | 6.29E-23    | ATF3       |

|                        |                    |                 |                 |              |
|------------------------|--------------------|-----------------|-----------------|--------------|
| ENSG00000198535        | 4.187588477        | 3.07E-08        | 2.31E-06        | C2CD4A       |
| ENSG00000205177        | 4.186655619        | 1.25E-11        | 2.19E-09        | C11orf91     |
| ENSG00000166527        | 4.18232652         | 1.91E-09        | 1.93E-07        | CLEC4D       |
| ENSG00000260467        | 4.167954377        | 1.98E-06        | 8.48E-05        | AC018552.2   |
| ENSG00000124731        | 4.162855928        | 8.46E-16        | 3.85E-13        | TREM1        |
| ENSG00000196361        | 4.146283205        | 5.16E-06        | 0.000196482     | ELAVL3       |
| ENSG00000173237        | 4.143997587        | 8.49E-05        | 0.002027562     | C11orf86     |
| ENSG00000204421        | 4.126492756        | 1.39E-07        | 8.26E-06        | LY6G6C       |
| ENSG00000186431        | 4.124692194        | 5.75E-14        | 1.62E-11        | FCAR         |
| ENSG00000102802        | 4.107394396        | 1.13E-10        | 1.53E-08        | MEDAG        |
| ENSG00000110680        | 4.088190691        | 3.20E-11        | 4.91E-09        | CALCA        |
| ENSG00000275215        | 4.084897459        | 7.29E-08        | 4.68E-06        | RNA5-8SN4    |
| ENSG00000011422        | 4.080504003        | 3.89E-24        | 7.34E-21        | PLAUR        |
| ENSG00000226380        | 4.071901689        | 2.53E-20        | 2.62E-17        | AC016831.1   |
| ENSG00000151929        | 4.058579252        | 9.27E-25        | 2.41E-21        | BAG3         |
| ENSG00000261026        | 4.048620267        | 9.53E-08        | 5.96E-06        | AC105046.1   |
| ENSG00000079393        | 4.045137473        | 2.69E-06        | 0.000111242     | DUSP13       |
| ENSG00000185022        | 4.021935963        | 2.18E-18        | 1.57E-15        | MAFF         |
| ENSG00000232618        | 4.016969315        | 4.48E-07        | 2.33E-05        | AL355304.1   |
| ENSG00000253295        | 3.993650567        | 2.31E-05        | 0.000708782     | AC022217.2   |
| ENSG00000100985        | 3.983678538        | 1.98E-14        | 6.58E-12        | MMP9         |
| ENSG00000267200        | 3.981253257        | 0.000712793     | 0.010975743     | MIR132       |
| ENSG00000108691        | 3.972642582        | 1.84E-16        | 9.36E-14        | CCL2         |
| ENSG00000218565        | 3.969820176        | 2.52E-07        | 1.40E-05        | AL592429.1   |
| ENSG00000229672        | 3.961270804        | 0.000576617     | 0.009326501     | AL450322.2   |
| ENSG00000126251        | 3.946659684        | 3.26E-06        | 0.00013206      | GPR42        |
| ENSG00000279430        | 3.935333908        | 2.94E-05        | 0.000847461     | AL590560.3   |
| ENSG00000232530        | 3.920618432        | 0.000176306     | 0.003704006     | LIF-AS1      |
| ENSG00000255398        | 3.912581497        | 9.79E-11        | 1.34E-08        | HCAR3        |
| ENSG00000132002        | 3.912239499        | 7.07E-30        | 6.11E-26        | DNAJB1       |
| ENSG00000261618        | 3.911293247        | 7.61E-11        | 1.07E-08        | AC083837.1   |
| <b>ENSG00000050730</b> | <b>3.906504156</b> | <b>6.69E-09</b> | <b>5.98E-07</b> | <b>TNIP3</b> |
| ENSG00000131459        | 3.885836211        | 5.44E-11        | 7.84E-09        | GFPT2        |
| ENSG00000115844        | 3.88380021         | 6.45E-05        | 0.001617268     | DLX2         |
| ENSG00000188581        | 3.868034868        | 0.00062925      | 0.009991751     | KRTAP1-1     |
| ENSG00000120694        | 3.862909141        | 7.11E-22        | 9.22E-19        | HSPH1        |
| ENSG00000159339        | 3.833110584        | 3.06E-12        | 5.90E-10        | PADI4        |
| ENSG00000248323        | 3.826616714        | 2.13E-12        | 4.32E-10        | LUCAT1       |
| ENSG00000223414        | 3.816973629        | 4.36E-07        | 2.28E-05        | LINC00473    |
| ENSG00000139572        | 3.816281197        | 2.27E-10        | 2.82E-08        | GPR84        |
| ENSG00000204020        | 3.808525887        | 1.48E-06        | 6.57E-05        | LIPN         |
| ENSG00000170827        | 3.805438531        | 1.85E-06        | 7.99E-05        | CELP         |
| ENSG00000140379        | 3.798129501        | 2.89E-13        | 7.09E-11        | BCL2A1       |
| ENSG00000123358        | 3.793383448        | 3.29E-15        | 1.35E-12        | NR4A1        |
| ENSG00000188056        | 3.783796484        | 3.78E-05        | 0.001042744     | TREML4       |
| ENSG00000196979        | 3.774303852        | 9.66E-10        | 0.000334051     | AL360004.1   |
| ENSG00000241158        | 3.756774518        | 5.51E-06        | 6.33E-08        | ADAMTS9-AS1  |
| ENSG00000112149        | 3.750483456        | 2.39E-24        | 5.16E-21        | CD83         |
| ENSG00000239948        | 3.749696775        | 3.70E-05        | 0.001023665     | RN7SL368P    |
| ENSG00000137801        | 3.73915792         | 7.23E-15        | 2.64E-12        | THBS1        |
| ENSG00000134531        | 3.710289504        | 8.98E-16        | 4.02E-13        | EMP1         |
| ENSG00000213386        | 3.708737185        | 8.74E-05        | 0.002078157     | AC022217.1   |
| ENSG00000172548        | 3.707171563        | 7.46E-07        | 3.65E-05        | NIPAL4       |
| ENSG00000138135        | 3.674706344        | 7.58E-11        | 1.07E-08        | CH25H        |
| ENSG00000169194        | 3.667652821        | 0.000210011     | 0.004277029     | IL13         |
| ENSG00000207736        | 3.660897659        | 0.000228353     | 0.004571646     | MIR657       |
| ENSG00000282855        | 3.656857731        | 1.95E-06        | 8.40E-05        | AC093591.3   |
| ENSG00000237330        | 3.656237382        | 8.14E-06        | 0.000288379     | RNF223       |
| ENSG00000251230        | 3.647071781        | 4.94E-11        | 7.28E-09        | MIR3945HG    |
| ENSG00000128383        | 3.645429296        | 1.04E-12        | 2.22E-10        | APOBEC3A     |
| ENSG00000231412        | 3.634383862        | 1.16E-05        | 0.000391962     | AC005392.2   |
| ENSG00000240163        | 3.628317098        | 0.00050921      | 0.008420632     | AC087385.1   |
| ENSG00000135824        | 3.61876429         | 2.87E-05        | 0.000834787     | RGS8         |
| ENSG00000233791        | 3.617842931        | 1.23E-06        | 5.62E-05        | LINC01136    |
| ENSG00000261429        | 3.602434616        | 5.30E-05        | 0.001379089     | DPPA2P4      |
| ENSG00000217527        | 3.585586813        | 6.20E-05        | 0.001572939     | RPS16P5      |
| ENSG00000276176        | 3.585450352        | 0.00026566      | 0.005102592     | MIR6090      |
| ENSG00000111537        | 3.582613196        | 1.28E-07        | 7.68E-06        | IFNG         |
| ENSG00000176597        | 3.572688393        | 6.50E-18        | 4.11E-15        | B3GNT5       |
| ENSG00000261488        | 3.571692929        | 0.000102973     | 0.002389747     | AC128688.2   |

|                 |             |             |             |              |
|-----------------|-------------|-------------|-------------|--------------|
| ENSG00000260859 | 3.569920762 | 3.63E-05    | 0.001011526 | AC025280.1   |
| ENSG00000162631 | 3.557667378 | 0.001163305 | 0.016192655 | NTNG1        |
| ENSG00000182885 | 3.552164764 | 8.50E-12    | 1.54E-09    | ADGRG3       |
| ENSG00000255326 | 3.542444805 | 5.52E-06    | 0.000207889 | AP001922.5   |
| ENSG00000163421 | 3.537016834 | 2.22E-10    | 2.77E-08    | PROK2        |
| ENSG00000006128 | 3.525526607 | 2.41E-05    | 0.00073371  | TAC1         |
| ENSG00000126262 | 3.510421947 | 1.40E-10    | 1.83E-08    | FFAR2        |
| ENSG00000226652 | 3.505573757 | 2.34E-05    | 0.000715854 | PSMD10P2     |
| ENSG00000184106 | 3.503799651 | 4.64E-07    | 2.38E-05    | TREML3P      |
| ENSG00000163734 | 3.50195495  | 1.49E-14    | 5.09E-12    | CXCL3        |
| ENSG00000167210 | 3.493568784 | 5.89E-09    | 5.32E-07    | LOXHD1       |
| ENSG00000284387 | 3.471608863 | 0.000191614 | 0.003960925 | MIR24-2      |
| ENSG00000276462 | 3.469207112 | 0.00142244  | 0.01880955  | BX255923.2   |
| ENSG00000207808 | 3.465532294 | 4.21E-05    | 0.001133514 | MIR27A       |
| ENSG00000248690 | 3.457674285 | 0.000283837 | 0.005355949 | HAS2-AS1     |
| ENSG00000279770 | 3.443389689 | 0.000209615 | 0.004272324 | LINC00552    |
| ENSG00000234436 | 3.402793651 | 0.000487625 | 0.008136284 | AC245884.2   |
| ENSG00000238279 | 3.387973605 | 5.13E-06    | 0.000195491 | BX470102.1   |
| ENSG00000070985 | 3.387769278 | 8.12E-08    | 5.15E-06    | TRPM5        |
| ENSG00000172602 | 3.383309177 | 7.32E-14    | 1.95E-11    | RND1         |
| ENSG00000255443 | 3.37962482  | 4.40E-06    | 0.000170714 | CD44-AS1     |
| ENSG00000225173 | 3.378922527 | 0.003098425 | 0.03328088  | AL662890.2   |
| ENSG00000186354 | 3.375117315 | 2.86E-10    | 3.45E-08    | C9orf47      |
| ENSG00000105605 | 3.371089002 | 0.000885199 | 0.01308683  | CACNG7       |
| ENSG00000279691 | 3.366307526 | 9.64E-06    | 0.000334014 | AC113410.3   |
| ENSG00000005001 | 3.366113534 | 2.33E-08    | 1.86E-06    | PRSS22       |
| ENSG00000177535 | 3.365345488 | 0.000653703 | 0.010291858 | OR2B11       |
| ENSG00000169908 | 3.362629615 | 6.95E-13    | 1.53E-10    | TM4SF1       |
| ENSG00000270069 | 3.358635463 | 3.75E-11    | 5.69E-09    | MIR222HG     |
| ENSG00000241155 | 3.354662495 | 1.26E-07    | 7.56E-06    | ARHGAP31-AS1 |
| ENSG00000261227 | 3.349090473 | 0.000210281 | 0.004279172 | AC140912.1   |
| ENSG00000163497 | 3.34602742  | 0.001097127 | 0.015504392 | FEV          |
| ENSG00000115602 | 3.333231967 | 3.79E-09    | 3.59E-07    | IL1RL1       |
| ENSG00000204241 | 3.333122542 | 3.75E-06    | 0.000149088 | AP000911.1   |
| ENSG00000198454 | 3.331238027 | 0.004161222 | 0.041161671 | PRR31        |
| ENSG00000116741 | 3.328763904 | 9.88E-19    | 7.77E-16    | RGS2         |
| ENSG00000182759 | 3.323670323 | 5.91E-08    | 3.97E-06    | MAFA         |
| ENSG00000104941 | 3.321294119 | 0.002455039 | 0.028197629 | RSPH6A       |
| ENSG00000277452 | 3.319503969 | 1.08E-07    | 6.64E-06    | RN7SL473P    |
| ENSG00000272235 | 3.316882091 | 0.000508023 | 0.008406357 | AL590438.1   |
| ENSG00000123342 | 3.308103578 | 7.15E-13    | 1.56E-10    | MMP19        |
| ENSG00000184545 | 3.297557182 | 4.56E-12    | 8.70E-10    | DUSP8        |
| ENSG00000275166 | 3.295944196 | 3.51E-05    | 0.000982216 | MIR6814      |
| ENSG00000112195 | 3.286163784 | 3.51E-09    | 3.36E-07    | TREML2       |
| ENSG00000136997 | 3.282953872 | 2.25E-19    | 2.01E-16    | MYC          |
| ENSG00000207870 | 3.272571681 | 0.001511558 | 0.019580077 | MIR221       |
| ENSG00000164400 | 3.266585265 | 0.000274886 | 0.005232725 | CSF2         |
| ENSG00000104970 | 3.266404278 | 0.000203937 | 0.00418619  | KIR3DX1      |
| ENSG00000214856 | 3.263775615 | 0.003481931 | 0.036252879 | KRT16P1      |
| ENSG00000276070 | 3.259312258 | 7.42E-20    | 7.13E-17    | CCL4L2       |
| ENSG00000113070 | 3.257698138 | 3.71E-16    | 1.85E-13    | HBEGF        |
| ENSG00000231302 | 3.253951625 | 0.000300003 | 0.005595881 | RPL36P2      |
| ENSG00000239218 | 3.252045094 | 6.34E-05    | 0.001595997 | RPS20P2      |
| ENSG00000235448 | 3.251092077 | 0.000306046 | 0.005696325 | LURAP1L-AS1  |
| ENSG00000143217 | 3.250924423 | 1.70E-05    | 0.000541748 | NECTIN4      |
| ENSG00000163221 | 3.246448984 | 7.55E-10    | 8.34E-08    | S100A12      |
| ENSG00000227560 | 3.244647451 | 0.000212998 | 0.004331074 | RPS15AP30    |
| ENSG00000203804 | 3.243674075 | 6.30E-15    | 2.34E-12    | ADAMTSL4-AS1 |
| ENSG00000175505 | 3.235177584 | 6.78E-13    | 1.50E-10    | CLCF1        |
| ENSG00000125657 | 3.233826013 | 2.83E-11    | 4.45E-09    | TNFSF9       |
| ENSG00000260166 | 3.223927731 | 0.000447001 | 0.007645271 | AC134312.3   |
| ENSG00000236278 | 3.21464322  | 0.000290943 | 0.005450401 | PEBP1P3      |
| ENSG00000163464 | 3.206734895 | 7.03E-10    | 7.79E-08    | CXCR1        |
| ENSG00000120738 | 3.205658067 | 9.81E-14    | 2.50E-11    | EGR1         |
| ENSG00000278493 | 3.205129055 | 1.01E-05    | 0.000346715 | AC039056.2   |
| ENSG00000105376 | 3.20439183  | 3.93E-09    | 3.70E-07    | ICAM5        |
| ENSG00000118160 | 3.202159989 | 2.27E-08    | 1.82E-06    | SLC8A2       |
| ENSG00000106366 | 3.200282307 | 2.06E-06    | 8.77E-05    | SERPINE1     |
| ENSG00000233559 | 3.200098926 | 8.29E-11    | 1.16E-08    | LINC00513    |
| ENSG00000132510 | 3.199059514 | 9.27E-23    | 1.34E-19    | KDM6B        |

|                 |             |             |             |            |
|-----------------|-------------|-------------|-------------|------------|
| ENSG00000135477 | 3.198253826 | 3.45E-06    | 0.000139205 | KRT87P     |
| ENSG00000279806 | 3.192502287 | 5.51E-05    | 0.001429018 | AC018629.1 |
| ENSG00000118503 | 3.191985274 | 8.69E-21    | 9.80E-18    | TNFAIP3    |
| ENSG00000124762 | 3.190238237 | 6.48E-23    | 9.89E-20    | CDKN1A     |
| ENSG00000269902 | 3.189100382 | 0.003068137 | 0.033086406 | AC234772.3 |
| ENSG00000122861 | 3.18734295  | 4.29E-11    | 6.40E-09    | PLAU       |
| ENSG00000260078 | 3.182986731 | 9.39E-06    | 0.000328032 | AC007342.3 |
| ENSG00000267943 | 3.181403734 | 0.001316592 | 0.017764061 | AC010328.1 |
| ENSG00000223336 | 3.178173908 | 0.004962334 | 0.046598884 | RNU2-6P    |
| ENSG00000128564 | 3.176193753 | 4.72E-05    | 0.001244856 | VGf        |
| ENSG00000236525 | 3.164402674 | 0.000120935 | 0.002719563 | AC007278.2 |
| ENSG00000264741 | 3.162368598 | 0.000225457 | 0.004534648 | MIR4505    |
| ENSG00000213144 | 3.159326466 | 8.09E-08    | 5.14E-06    | AC084880.1 |
| ENSG00000137270 | 3.158611035 | 0.002062529 | 0.024855729 | GCM1       |
| ENSG00000201581 | 3.15290403  | 0.002613222 | 0.02941547  | RN7SKP78   |
| ENSG00000124610 | 3.148847883 | 0.005466702 | 0.049890625 | HIST1H1A   |
| ENSG00000181652 | 3.148658705 | 2.54E-10    | 3.10E-08    | ATG9B      |
| ENSG00000087074 | 3.144542256 | 2.33E-17    | 1.35E-14    | PPP1R15A   |
| ENSG00000188089 | 3.143705788 | 0.000462422 | 0.007846953 | PLA2G4E    |
| ENSG00000143816 | 3.140786409 | 1.58E-08    | 1.30E-06    | WNT9A      |
| ENSG00000164023 | 3.140361529 | 1.84E-12    | 3.82E-10    | SGMS2      |
| ENSG00000244124 | 3.137120367 | 1.52E-05    | 0.000490839 | ATP1B3-AS1 |
| ENSG00000274213 | 3.131092832 | 6.66E-12    | 1.23E-09    | AC015912.3 |
| ENSG00000176170 | 3.126925347 | 1.40E-10    | 1.83E-08    | SPHK1      |
| ENSG00000102554 | 3.126312744 | 2.39E-10    | 2.94E-08    | KLF5       |
| ENSG00000131355 | 3.124183075 | 7.33E-07    | 3.60E-05    | ADGRE3     |
| ENSG00000279637 | 3.121668052 | 0.0002913   | 0.005453154 | AC018445.3 |
| ENSG00000224821 | 3.121528522 | 7.06E-05    | 0.001735617 | COL4A2-AS2 |
| ENSG00000120217 | 3.113899429 | 9.73E-10    | 1.04E-07    | CD274      |
| ENSG00000170893 | 3.106926389 | 0.002670426 | 0.029916613 | TRH        |
| ENSG00000270210 | 3.105228069 | 7.58E-06    | 0.000272624 | AC104695.2 |
| ENSG00000114529 | 3.103509755 | 1.14E-07    | 6.93E-06    | C3orf52    |
| ENSG00000258881 | 3.103475668 | 1.21E-05    | 0.000404097 | AC007040.2 |
| ENSG00000059804 | 3.102917033 | 1.10E-15    | 4.82E-13    | SLC2A3     |
| ENSG00000152049 | 3.09912915  | 3.20E-09    | 3.10E-07    | KCNE4      |
| ENSG00000140932 | 3.097568424 | 1.41E-08    | 1.18E-06    | CMTM2      |
| ENSG00000142627 | 3.094005551 | 6.49E-14    | 1.75E-11    | EPHA2      |
| ENSG00000130720 | 3.092828143 | 0.000980278 | 0.014156996 | FIBCD1     |
| ENSG00000134668 | 3.09206107  | 1.32E-08    | 1.10E-06    | SPOCD1     |
| ENSG00000239503 | 3.069915283 | 3.37E-05    | 0.000948162 | MARK2P8    |
| ENSG00000145040 | 3.069139685 | 0.001330655 | 0.017922037 | UCN2       |
| ENSG00000222047 | 3.065405277 | 6.79E-05    | 0.001681803 | C10orf55   |
| ENSG00000090339 | 3.058959382 | 3.04E-13    | 7.37E-11    | ICAM1      |
| ENSG00000230495 | 3.052650117 | 0.001112488 | 0.01566176  | AL132765.1 |
| ENSG00000228719 | 3.038614903 | 0.001791207 | 0.02226864  | AL022313.2 |
| ENSG00000146592 | 3.032989029 | 5.56E-16    | 2.67E-13    | CREB5      |
| ENSG00000274963 | 3.031503275 | 9.52E-06    | 0.000331092 | RN7SL600P  |
| ENSG00000168398 | 3.030446822 | 5.57E-08    | 3.79E-06    | BDKRB2     |
| ENSG00000261592 | 3.02900485  | 8.87E-08    | 5.57E-06    | AC010531.3 |
| ENSG00000257446 | 3.019397743 | 3.62E-06    | 0.000145078 | ZNF878     |
| ENSG00000183019 | 3.007095526 | 9.38E-11    | 1.30E-08    | MCEMP1     |
| ENSG00000162040 | 3.005414825 | 0.000226678 | 0.004552167 | HS3ST6     |
| ENSG00000273972 | 2.995336646 | 0.000321793 | 0.005913055 | AC068722.2 |
| ENSG00000273980 | 2.981822207 | 0.001214723 | 0.016728876 | AL592071.1 |
| ENSG00000257453 | 2.973544824 | 0.000139547 | 0.003086685 | AC011611.3 |
| ENSG00000254281 | 2.970995139 | 0.000998678 | 0.014395395 | AP003354.2 |
| ENSG00000164283 | 2.969272356 | 5.88E-05    | 0.0015008   | ESM1       |
| ENSG00000270607 | 2.965319002 | 4.33E-06    | 0.000168597 | AC009549.1 |
| ENSG00000258820 | 2.962345373 | 0.001772286 | 0.022128839 | AF111167.1 |
| ENSG00000173846 | 2.954883488 | 4.47E-18    | 2.97E-15    | PLK3       |
| ENSG00000255801 | 2.951394923 | 0.005230065 | 0.0483218   | AC092746.1 |
| ENSG00000136689 | 2.949954907 | 2.99E-15    | 1.25E-12    | IL1RN      |
| ENSG00000262477 | 2.948357537 | 0.001767684 | 0.022092649 | AC021224.1 |
| ENSG00000183625 | 2.943076341 | 0.001193702 | 0.016535933 | CCR3       |
| ENSG00000270640 | 2.941065486 | 2.61E-05    | 0.000775284 | AC104695.3 |
| ENSG00000163273 | 2.937321737 | 0.000207781 | 0.004244943 | NPPC       |
| ENSG00000131016 | 2.932335379 | 6.30E-15    | 2.34E-12    | AKAP12     |
| ENSG00000257335 | 2.925425132 | 5.44E-08    | 3.71E-06    | MGAM       |
| ENSG00000237453 | 2.925347874 | 6.60E-05    | 0.00164909  | AC096536.2 |
| ENSG00000231956 | 2.924236636 | 0.001737437 | 0.021788084 | HNRNPA1P9  |

|                 |             |             |             |             |
|-----------------|-------------|-------------|-------------|-------------|
| ENSG00000259630 | 2.922883868 | 1.31E-06    | 5.90E-05    | AC104046.1  |
| ENSG00000273199 | 2.922540578 | 2.13E-08    | 1.72E-06    | AP000692.2  |
| ENSG00000214650 | 2.91330812  | 0.001406131 | 0.018657311 | AC073592.1  |
| ENSG00000104722 | 2.911457838 | 0.000875095 | 0.012989254 | NEFM        |
| ENSG00000233930 | 2.909774256 | 1.58E-09    | 1.63E-07    | KRTAP5-AS1  |
| ENSG00000275238 | 2.903174269 | 0.000938642 | 0.013674348 | MIR4734     |
| ENSG00000139289 | 2.902103799 | 1.49E-16    | 7.73E-14    | PHLDA1      |
| ENSG00000173334 | 2.901284299 | 6.16E-26    | 2.00E-22    | TRIB1       |
| ENSG00000243870 | 2.899917028 | 0.000534545 | 0.008778048 | RN7SL236P   |
| ENSG00000267275 | 2.899590658 | 0.002271032 | 0.026686679 | AC020911.2  |
| ENSG00000280890 | 2.897815549 | 0.000429961 | 0.007397726 | AC073324.2  |
| ENSG00000250659 | 2.887607122 | 4.46E-05    | 0.001185895 | AP001363.1  |
| ENSG00000277437 | 2.885668823 | 0.000188267 | 0.00391723  | MIR3687-1   |
| ENSG00000274552 | 2.88335507  | 0.000244255 | 0.004793821 | MIR6889     |
| ENSG00000006327 | 2.881406391 | 9.28E-10    | 1.00E-07    | TNFRSF12A   |
| ENSG00000273172 | 2.879564041 | 0.0036731   | 0.03535744  | LINC02091   |
| ENSG00000054356 | 2.878954339 | 0.001841889 | 0.02281129  | PTPRN       |
| ENSG00000138166 | 2.868644213 | 2.11E-20    | 2.29E-17    | DUSP5       |
| ENSG00000204044 | 2.866650125 | 0.000564045 | 0.009163872 | SLC12A5-AS1 |
| ENSG00000197106 | 2.865751973 | 0.000452865 | 0.007720127 | SLC6A17     |
| ENSG00000067082 | 2.864638839 | 3.96E-24    | 7.34E-21    | KLF6        |
| ENSG00000205502 | 2.862452302 | 5.17E-12    | 9.66E-10    | C2CD4B      |
| ENSG00000181634 | 2.86051663  | 7.60E-07    | 3.70E-05    | TNFSF15     |
| ENSG00000226012 | 2.855260009 | 0.004550063 | 0.043821805 | AP001434.1  |
| ENSG00000177822 | 2.852547565 | 0.004304247 | 0.042174464 | AC098864.1  |
| ENSG00000133055 | 2.852083398 | 0.003582227 | 0.036882728 | MYBPH       |
| ENSG00000160271 | 2.850624235 | 7.37E-14    | 1.95E-11    | RALGDS      |
| ENSG00000162616 | 2.848651258 | 1.49E-14    | 5.09E-12    | DNAJB4      |
| ENSG00000175352 | 2.847492136 | 2.94E-07    | 1.61E-05    | NRIP3       |
| ENSG00000248767 | 2.844402532 | 0.002031641 | 0.024597737 | AC187653.1  |
| ENSG00000206172 | 2.843840428 | 0.00027457  | 0.005232725 | HBA1        |
| ENSG00000184557 | 2.840364253 | 1.96E-12    | 4.00E-10    | SOCS3       |
| ENSG00000180316 | 2.837226143 | 4.63E-05    | 0.001225091 | PNPLA1      |
| ENSG00000170956 | 2.834587311 | 1.31E-10    | 1.75E-08    | CEACAM3     |
| ENSG00000279463 | 2.829822284 | 0.002826979 | 0.031198982 | AL159972.1  |
| ENSG00000178053 | 2.825149928 | 2.59E-12    | 5.10E-10    | MLF1        |
| ENSG00000138892 | 2.820653059 | 0.003008719 | 0.032690214 | TTLL8       |
| ENSG00000229951 | 2.819020652 | 2.80E-08    | 2.16E-06    | FLJ31356    |
| ENSG00000259883 | 2.814800905 | 1.30E-06    | 5.84E-05    | EHD4-AS1    |
| ENSG00000166592 | 2.81295893  | 2.19E-11    | 3.55E-09    | RRAD        |
| ENSG00000162975 | 2.812914906 | 3.31E-05    | 0.000933366 | KCNF1       |
| ENSG00000196358 | 2.811422671 | 2.09E-10    | 2.62E-08    | NTNG2       |
| ENSG00000181649 | 2.811152359 | 1.61E-07    | 9.37E-06    | PHLDA2      |
| ENSG00000163739 | 2.804437843 | 9.40E-09    | 8.21E-07    | CXCL1       |
| ENSG00000269959 | 2.803942761 | 0.004666851 | 0.044577365 | SPACA6P-AS  |
| ENSG00000275302 | 2.80003657  | 2.98E-18    | 2.09E-15    | CCL4        |
| ENSG00000258947 | 2.793928937 | 0.000207538 | 0.004243328 | TUBB3       |
| ENSG00000204936 | 2.78752264  | 2.97E-08    | 2.26E-06    | CD177       |
| ENSG00000228323 | 2.780383001 | 5.74E-07    | 2.86E-05    | AC008440.1  |
| ENSG00000267519 | 2.779456502 | 3.63E-14    | 1.08E-11    | AC020916.1  |
| ENSG00000099812 | 2.778183753 | 4.13E-05    | 0.00111805  | MISP        |
| ENSG00000250027 | 2.777640308 | 0.00048089  | 0.008060195 | AC022272.1  |
| ENSG00000151014 | 2.776768479 | 1.08E-16    | 5.74E-14    | NOCT        |
| ENSG00000163638 | 2.776051992 | 1.17E-07    | 7.08E-06    | ADAMTS9     |
| ENSG00000165997 | 2.773361587 | 1.94E-21    | 2.29E-18    | ARL5B       |
| ENSG00000177606 | 2.765354385 | 5.09E-13    | 1.17E-10    | JUN         |
| ENSG00000260910 | 2.762185327 | 8.96E-05    | 0.002116617 | LINC00565   |
| ENSG00000279035 | 2.758947951 | 0.003639896 | 0.037357888 | AC022211.4  |
| ENSG00000222041 | 2.756044758 | 1.89E-08    | 1.54E-06    | CYTOR       |
| ENSG00000103196 | 2.755572102 | 1.51E-08    | 1.25E-06    | CRISPLD2    |
| ENSG00000171049 | 2.75482806  | 5.38E-11    | 7.80E-09    | FPR2        |
| ENSG00000261888 | 2.750622363 | 5.73E-10    | 6.55E-08    | AC144831.1  |
| ENSG00000232456 | 2.749544318 | 0.003857001 | 0.038915711 | AL355994.2  |
| ENSG00000156030 | 2.747693995 | 8.26E-18    | 4.98E-15    | ELMSAN1     |
| ENSG00000250274 | 2.746923233 | 0.001788021 | 0.022261029 | AC034199.1  |
| ENSG00000059728 | 2.742645295 | 1.80E-24    | 4.24E-21    | MXD1        |
| ENSG00000181418 | 2.740976047 | 7.68E-05    | 0.001864013 | DDN         |
| ENSG00000075426 | 2.738407098 | 1.75E-13    | 4.37E-11    | FOSL2       |
| ENSG00000234604 | 2.736271258 | 3.73E-05    | 0.001029514 | AL021068.2  |
| ENSG00000163874 | 2.735332621 | 2.70E-15    | 1.15E-12    | ZC3H12A     |



|                 |             |             |             |            |
|-----------------|-------------|-------------|-------------|------------|
| ENSG00000250796 | 2.731082978 | 0.001610908 | 0.020553971 | AC112484.3 |
| ENSG00000237136 | 2.723620702 | 0.005161106 | 0.047979239 | C4orf51    |
| ENSG00000188536 | 2.723151517 | 5.77E-05    | 0.00148198  | HBA2       |
| ENSG00000167612 | 2.71644743  | 0.001753071 | 0.021952203 | ANKRD33    |
| ENSG00000264635 | 2.714735968 | 1.07E-05    | 0.000365571 | AP001020.2 |
| ENSG00000142319 | 2.712871864 | 0.00236413  | 0.027605633 | SLC6A3     |
| ENSG00000229647 | 2.711354197 | 0.001013289 | 0.01454137  | MYOSLID    |
| ENSG00000167767 | 2.707232607 | 5.27E-06    | 0.000199443 | KRT80      |
| ENSG00000245293 | 2.700624334 | 5.30E-07    | 2.67E-05    | AC096564.1 |
| ENSG00000250415 | 2.698087503 | 0.004044312 | 0.040302437 | AC022113.2 |
| ENSG00000231274 | 2.695837886 | 1.13E-07    | 6.85E-06    | SBK3       |
| ENSG00000233214 | 2.694507595 | 0.000315107 | 0.005806657 | AC002511.2 |
| ENSG00000244953 | 2.692800809 | 1.66E-07    | 9.57E-06    | AC087521.1 |
| ENSG00000141682 | 2.690699575 | 4.71E-09    | 4.32E-07    | PMAIP1     |
| ENSG00000081181 | 2.688176646 | 7.07E-12    | 1.29E-09    | ARG2       |
| ENSG00000184389 | 2.685023484 | 0.000308301 | 0.005725976 | A3GALT2    |
| ENSG00000143333 | 2.68327786  | 1.65E-07    | 9.56E-06    | RGS16      |
| ENSG00000272256 | 2.683195282 | 0.000151311 | 0.003299081 | AC044849.2 |
| ENSG00000250068 | 2.679932385 | 0.002000595 | 0.024324006 | AL445187.1 |
| ENSG00000159871 | 2.678251319 | 1.30E-08    | 1.10E-06    | LYPD5      |
| ENSG00000165046 | 2.675600554 | 2.66E-12    | 5.18E-10    | LETM2      |
| ENSG00000232680 | 2.670379647 | 0.001479773 | 0.019303266 | AC002511.1 |
| ENSG00000228113 | 2.66986345  | 1.57E-05    | 0.000506478 | AC003991.1 |
| ENSG00000171621 | 2.669614011 | 5.89E-10    | 6.65E-08    | SPSB1      |
| ENSG00000170345 | 2.667867344 | 1.93E-07    | 1.09E-05    | FOS        |
| ENSG00000237803 | 2.659084563 | 0.003817473 | 0.038670516 | LINC00211  |
| ENSG00000261068 | 2.656730574 | 0.001561319 | 0.020104204 | AL512274.1 |
| ENSG00000180871 | 2.656221582 | 6.25E-08    | 4.16E-06    | CXCR2      |
| ENSG00000163661 | 2.654612879 | 1.10E-07    | 6.76E-06    | PTX3       |
| ENSG00000162711 | 2.653215965 | 4.51E-13    | 1.06E-10    | NLRP3      |
| ENSG00000188396 | 2.65119265  | 1.67E-12    | 3.50E-10    | TCTEX1D4   |
| ENSG00000100604 | 2.64168359  | 0.000812403 | 0.012198265 | CHGA       |
| ENSG00000204610 | 2.635485501 | 9.58E-10    | 1.03E-07    | TRIM15     |
| ENSG00000008438 | 2.63499388  | 1.22E-06    | 5.55E-05    | PGLYRP1    |
| ENSG00000276085 | 2.63300052  | 2.45E-11    | 3.89E-09    | CCL3L3     |
| ENSG00000236776 | 2.632600876 | 0.000207133 | 0.004239778 | RPL21P23   |
| ENSG00000275339 | 2.628917992 | 0.001124145 | 0.015774514 | Z99129.1   |
| ENSG00000172738 | 2.624329926 | 5.00E-09    | 4.54E-07    | TMEM217    |
| ENSG00000237989 | 2.623530953 | 1.82E-10    | 2.30E-08    | LINC01679  |
| ENSG00000167434 | 2.615442341 | 2.13E-05    | 0.000658082 | CA4        |
| ENSG00000235481 | 2.614273422 | 0.000752552 | 0.011458751 | UBE2R2-AS1 |
| ENSG00000087494 | 2.608598787 | 5.51E-05    | 0.001429018 | PTHLH      |
| ENSG00000251009 | 2.605301663 | 0.001787331 | 0.022261029 | AC133961.1 |
| ENSG00000144136 | 2.604236308 | 1.06E-14    | 3.77E-12    | SLC20A1    |
| ENSG00000275894 | 2.602403288 | 3.85E-14    | 1.13E-11    | AL021578.1 |
| ENSG00000229191 | 2.594242301 | 0.001784723 | 0.022241313 | AL358473.1 |
| ENSG00000218416 | 2.593177813 | 5.29E-07    | 2.66E-05    | PP1A71     |
| ENSG00000229331 | 2.591464012 | 3.94E-05    | 0.001077156 | GK-IT1     |
| ENSG00000271824 | 2.590650401 | 0.00023948  | 0.004717957 | AC009014.1 |
| ENSG00000246130 | 2.58913558  | 1.07E-05    | 0.000365571 | AC107959.2 |
| ENSG00000160161 | 2.586036597 | 5.12E-08    | 3.55E-06    | CILP2      |
| ENSG00000266709 | 2.58505516  | 1.29E-07    | 7.69E-06    | AC005224.4 |
| ENSG00000213438 | 2.583996811 | 0.000526713 | 0.008687914 | YBX2P1     |
| ENSG00000224621 | 2.583036868 | 0.00026569  | 0.005102592 | AL451042.1 |
| ENSG00000260454 | 2.57950444  | 0.002242183 | 0.026416126 | AL355607.2 |
| ENSG00000164949 | 2.578332264 | 6.58E-09    | 5.91E-07    | GEM        |
| ENSG00000233538 | 2.568540716 | 0.004402105 | 0.042828936 | AC017104.3 |
| ENSG00000205716 | 2.556188693 | 4.63E-05    | 0.001225091 | FAM183DP   |
| ENSG00000130164 | 2.555705316 | 1.79E-14    | 6.05E-12    | LDLR       |
| ENSG00000130522 | 2.550121505 | 2.43E-12    | 4.85E-10    | JUND       |
| ENSG00000128965 | 2.548175076 | 5.94E-08    | 3.98E-06    | CHAC1      |
| ENSG00000169508 | 2.54368894  | 1.54E-10    | 1.98E-08    | GPR183     |
| ENSG00000269952 | 2.541804504 | 3.70E-05    | 0.001023665 | AL117336.2 |
| ENSG00000143546 | 2.537927724 | 2.56E-08    | 2.00E-06    | S100A8     |
| ENSG00000154734 | 2.535776628 | 2.99E-09    | 2.92E-07    | ADAMTS1    |
| ENSG00000164935 | 2.535764888 | 1.96E-05    | 0.000615105 | DCSTAMP    |
| ENSG00000129451 | 2.535308407 | 0.000114108 | 0.002594188 | KLK10      |
| ENSG00000163659 | 2.532625859 | 6.30E-22    | 8.60E-19    | TIPARP     |
| ENSG00000243415 | 2.526116968 | 3.79E-05    | 0.001044668 | AC107021.1 |
| ENSG00000178878 | 2.525490157 | 1.56E-07    | 9.12E-06    | APOLD1     |

|                 |             |             |             |             |
|-----------------|-------------|-------------|-------------|-------------|
| ENSG00000197019 | 2.522116417 | 7.01E-16    | 3.25E-13    | SERTAD1     |
| ENSG00000126259 | 2.519567549 | 0.001205687 | 0.016659064 | KIRREL2     |
| ENSG00000086967 | 2.516787136 | 0.000153037 | 0.003331119 | MYBPC2      |
| ENSG00000261253 | 2.513524185 | 1.21E-05    | 0.000404097 | AC137932.2  |
| ENSG00000274008 | 2.513427896 | 0.000371101 | 0.006567929 | Metazoa_SRP |
| ENSG00000231507 | 2.512466168 | 0.000172396 | 0.003630678 | LINC01353   |
| ENSG00000204420 | 2.511484371 | 6.51E-08    | 4.28E-06    | MPIG6B      |
| ENSG00000258512 | 2.508982855 | 0.001923808 | 0.023533774 | LINC00239   |
| ENSG00000183421 | 2.504021546 | 7.64E-13    | 1.64E-10    | RIPK4       |
| ENSG00000234193 | 2.503643121 | 5.08E-05    | 0.001327761 | AC013476.1  |
| ENSG00000069849 | 2.5014324   | 1.25E-09    | 1.32E-07    | ATP1B3      |
| ENSG00000144550 | 2.498703599 | 3.63E-05    | 0.001011526 | CPNE9       |
| ENSG00000136327 | 2.497544485 | 0.00365362  | 0.03743055  | NKX2-8      |
| ENSG00000167874 | 2.495994724 | 4.55E-09    | 4.19E-07    | TMEM88      |
| ENSG00000279762 | 2.493191216 | 1.18E-05    | 0.000396142 | AC005899.8  |
| ENSG00000142871 | 2.490124962 | 1.37E-11    | 2.34E-09    | CYR61       |
| ENSG00000102760 | 2.485313246 | 6.19E-09    | 5.58E-07    | RGCC        |
| ENSG00000086544 | 2.482738587 | 9.70E-14    | 2.49E-11    | ITPKC       |
| ENSG00000236056 | 2.48095262  | 0.000232146 | 0.004601483 | GAPDHP14    |
| ENSG00000237399 | 2.478202994 | 1.01E-07    | 6.25E-06    | PITRM1-AS1  |
| ENSG00000187479 | 2.474714001 | 4.58E-07    | 2.36E-05    | C11orf96    |
| ENSG00000172965 | 2.471111602 | 3.95E-09    | 3.70E-07    | MIR4435-2HG |
| ENSG00000115607 | 2.470114941 | 7.43E-07    | 3.65E-05    | IL18RAP     |
| ENSG00000183638 | 2.466142743 | 0.000184676 | 0.003845581 | RP1L1       |
| ENSG00000039987 | 2.464789246 | 0.002416092 | 0.027923351 | BEST2       |
| ENSG00000149798 | 2.464399102 | 3.45E-10    | 4.07E-08    | CDC42EP2    |
| ENSG00000159388 | 2.460015703 | 2.36E-11    | 3.79E-09    | BTG2        |
| ENSG00000232034 | 2.458771057 | 0.000876971 | 0.013009653 | AC092168.2  |
| ENSG00000166483 | 2.455743938 | 3.73E-17    | 2.10E-14    | WEE1        |
| ENSG00000210049 | 2.455683207 | 0.004425747 | 0.042991554 | MT-TF       |
| ENSG00000237513 | 2.45486038  | 6.58E-05    | 0.00164517  | AC007384.1  |
| ENSG00000267655 | 2.453126472 | 0.00115806  | 0.016145637 | AC125437.1  |
| ENSG00000125845 | 2.448122514 | 5.55E-12    | 1.03E-09    | BMP2        |
| ENSG00000237781 | 2.443879729 | 1.72E-10    | 2.20E-08    | AL356356.1  |
| ENSG00000178726 | 2.442372366 | 6.49E-10    | 7.26E-08    | THBD        |
| ENSG00000155307 | 2.441565029 | 2.05E-11    | 3.36E-09    | SAMSN1      |
| ENSG00000181773 | 2.440380123 | 1.28E-06    | 5.79E-05    | GPR3        |
| ENSG00000112137 | 2.439796833 | 6.26E-14    | 1.73E-11    | PHACTR1     |
| ENSG00000173535 | 2.435552242 | 1.42E-07    | 8.35E-06    | TNFRSF10C   |
| ENSG00000128254 | 2.434003434 | 0.000168311 | 0.003556181 | C22orf24    |
| ENSG00000120833 | 2.430780646 | 1.44E-10    | 1.87E-08    | SOCS2       |
| ENSG00000105825 | 2.429270912 | 2.85E-08    | 2.19E-06    | TFPI2       |
| ENSG00000227218 | 2.428100383 | 3.06E-07    | 1.67E-05    | AL157935.1  |
| ENSG00000140519 | 2.426724762 | 4.99E-09    | 4.54E-07    | RHCG        |
| ENSG00000153234 | 2.424764703 | 1.40E-11    | 2.36E-09    | NR4A2       |
| ENSG00000283525 | 2.424135748 | 0.005358569 | 0.049197955 | AC005622.1  |
| ENSG00000260727 | 2.421540875 | 1.37E-06    | 6.10E-05    | SLC7A5P1    |
| ENSG00000152661 | 2.418830968 | 2.33E-10    | 2.88E-08    | GJA1        |
| ENSG00000255092 | 2.415588801 | 0.002013248 | 0.024420637 | AC010768.2  |
| ENSG00000227959 | 2.413395903 | 3.85E-07    | 2.04E-05    | AL451042.2  |
| ENSG00000136826 | 2.412559101 | 8.67E-10    | 9.45E-08    | KLF4        |
| ENSG00000282508 | 2.41185328  | 2.55E-06    | 0.000106338 | LINC01002   |
| ENSG00000196754 | 2.41147566  | 0.002209401 | 0.026128135 | S100A2      |
| ENSG00000281491 | 2.408864856 | 0.000739548 | 0.011320531 | DNAJB5-AS1  |
| ENSG00000238160 | 2.405888034 | 0.001033868 | 0.014752095 | AC116366.2  |
| ENSG00000267909 | 2.403167753 | 0.002947552 | 0.032214489 | CCDC177     |
| ENSG00000240023 | 2.400505397 | 0.004218205 | 0.041551077 | AL133163.1  |
| ENSG00000279622 | 2.400252348 | 0.00376958  | 0.038316216 | AC025280.2  |
| ENSG00000207730 | 2.399798159 | 0.000418053 | 0.007240851 | MIR200B     |
| ENSG00000129990 | 2.398949222 | 0.001741918 | 0.021833726 | SYT5        |
| ENSG00000267149 | 2.39817989  | 0.000318106 | 0.005853597 | AC011476.2  |
| ENSG00000121797 | 2.396921966 | 1.51E-11    | 2.52E-09    | CCRL2       |
| ENSG00000196428 | 2.393725064 | 6.35E-17    | 3.51E-14    | TSC22D2     |
| ENSG00000272986 | 2.393531436 | 0.002443143 | 0.028123241 | AC009570.1  |
| ENSG00000280035 | 2.393056691 | 0.000323243 | 0.005931306 | AC011676.5  |
| ENSG00000188011 | 2.392688918 | 0.001200639 | 0.016623012 | RTP5        |
| ENSG00000139890 | 2.392212213 | 1.70E-07    | 9.77E-06    | REM2        |
| ENSG00000107984 | 2.39114102  | 0.000309479 | 0.005726819 | DKK1        |
| ENSG00000144655 | 2.389972356 | 7.76E-14    | 2.01E-11    | CSRNP1      |
| ENSG00000102445 | 2.389187296 | 2.37E-08    | 1.88E-06    | RUBCNL      |

|                 |             |             |             |            |
|-----------------|-------------|-------------|-------------|------------|
| ENSG00000170525 | 2.387680799 | 5.78E-08    | 3.89E-06    | PFKFB3     |
| ENSG00000229337 | 2.387394604 | 0.003894353 | 0.039179091 | AC079305.3 |
| ENSG00000131435 | 2.384684112 | 7.00E-06    | 0.000254327 | PDLIM4     |
| ENSG00000124145 | 2.38021985  | 6.76E-16    | 3.19E-13    | SDC4       |
| ENSG00000158050 | 2.378569712 | 4.80E-06    | 0.000184884 | DUSP2      |
| ENSG00000200879 | 2.374996236 | 0.000391881 | 0.006870106 | SNORD14E   |
| ENSG00000162571 | 2.369547857 | 0.0004552   | 0.007744666 | TLL10      |
| ENSG00000261051 | 2.368123597 | 3.25E-05    | 0.000920492 | AC107021.2 |
| ENSG00000139797 | 2.367605735 | 0.004344809 | 0.042427708 | RNF113B    |
| ENSG00000197279 | 2.36585204  | 4.08E-08    | 2.94E-06    | ZNF165     |
| ENSG00000187556 | 2.362280505 | 7.82E-05    | 0.001887974 | NANOS3     |
| ENSG00000267122 | 2.362233081 | 0.000273748 | 0.005222556 | AC004490.1 |
| ENSG00000260823 | 2.359537621 | 0.001905582 | 0.023390868 | AC026461.3 |
| ENSG00000223573 | 2.35599408  | 6.81E-05    | 0.001682743 | TINCR      |
| ENSG00000128422 | 2.354401141 | 0.000637436 | 0.010097022 | KRT17      |
| ENSG00000070404 | 2.352679075 | 8.84E-08    | 5.57E-06    | FSTL3      |
| ENSG00000248713 | 2.347755799 | 0.001947844 | 0.023794144 | AC083902.2 |
| ENSG00000160886 | 2.346750763 | 0.000160415 | 0.00343977  | LY6K       |
| ENSG00000132965 | 2.345422568 | 9.30E-07    | 4.37E-05    | ALOX5AP    |
| ENSG00000230673 | 2.344896518 | 0.000476831 | 0.008012854 | PABPC1P3   |
| ENSG00000218073 | 2.341854924 | 0.00262287  | 0.029460163 | AL021407.3 |
| ENSG00000224411 | 2.335367621 | 3.66E-08    | 2.68E-06    | HSP90AA2P  |
| ENSG00000170542 | 2.330339409 | 1.45E-13    | 3.65E-11    | SERPINB9   |
| ENSG00000254166 | 2.326962673 | 0.000200042 | 0.004116007 | CASC19     |
| ENSG00000218991 | 2.321887549 | 0.002797437 | 0.030965142 | CCNG1P1    |
| ENSG00000234883 | 2.31850814  | 7.57E-06    | 0.000272624 | MIR155HG   |
| ENSG00000188766 | 2.314477998 | 1.23E-05    | 0.000411297 | SPRED3     |
| ENSG00000228863 | 2.311301561 | 0.001605713 | 0.020504675 | AL121985.1 |
| ENSG00000089169 | 2.310505164 | 0.001498506 | 0.019488835 | RPH3A      |
| ENSG00000258986 | 2.306561663 | 0.000131395 | 0.002923818 | TMEM179    |
| ENSG00000124216 | 2.303465243 | 1.59E-09    | 1.63E-07    | SNAI1      |
| ENSG00000267270 | 2.303366783 | 4.90E-11    | 7.27E-09    | PARD6G-AS1 |
| ENSG00000224969 | 2.300255599 | 0.005256164 | 0.04851527  | AL645608.2 |
| ENSG00000179820 | 2.298486547 | 2.90E-13    | 7.09E-11    | MYADM      |
| ENSG00000236095 | 2.296475325 | 0.001395958 | 0.018564596 | AL807757.2 |
| ENSG00000137331 | 2.295132002 | 8.69E-07    | 4.13E-05    | IER3       |
| ENSG00000236345 | 2.288036956 | 2.08E-05    | 0.000649221 | AL354719.2 |
| ENSG00000131746 | 2.287929074 | 5.37E-06    | 0.000202861 | TNS4       |
| ENSG00000124134 | 2.281077248 | 0.00340583  | 0.035617758 | KCNS1      |
| ENSG00000008516 | 2.280891172 | 3.08E-07    | 1.68E-05    | MMP25      |
| ENSG00000163600 | 2.280824101 | 0.000954672 | 0.013861171 | ICOS       |
| ENSG00000258521 | 2.279065216 | 1.55E-05    | 0.000500506 | AL157871.2 |
| ENSG00000197405 | 2.278486417 | 6.65E-13    | 1.50E-10    | C5AR1      |
| ENSG00000231233 | 2.277505732 | 0.001116826 | 0.015688768 | CFAP58-AS1 |
| ENSG00000188112 | 2.276487532 | 5.77E-05    | 0.001481766 | C6orf132   |
| ENSG00000133874 | 2.273439408 | 8.29E-10    | 9.11E-08    | RNF122     |
| ENSG00000274370 | 2.271681099 | 2.48E-05    | 0.000748089 | AC130371.2 |
| ENSG00000184292 | 2.269617955 | 0.000113274 | 0.002578088 | TACSTD2    |
| ENSG00000235947 | 2.267547184 | 0.001012779 | 0.01454137  | EGOT       |
| ENSG00000165071 | 2.267291449 | 2.10E-07    | 1.18E-05    | TMEM71     |
| ENSG00000226644 | 2.266951543 | 1.54E-07    | 9.04E-06    | AL121899.1 |
| ENSG00000230911 | 2.260409224 | 0.000476057 | 0.008010799 | AP000907.1 |
| ENSG00000116299 | 2.251749803 | 3.56E-06    | 0.000143008 | KIAA1324   |
| ENSG00000253276 | 2.250552096 | 1.16E-07    | 7.03E-06    | CCDC71L    |
| ENSG00000113303 | 2.244222441 | 6.37E-06    | 0.000235546 | BTNL8      |
| ENSG00000283849 | 2.240252064 | 5.83E-10    | 6.61E-08    | AC092053.2 |
| ENSG00000108576 | 2.239398366 | 0.000577076 | 0.009326501 | SLC6A4     |
| ENSG00000007908 | 2.236947311 | 2.84E-06    | 0.000116656 | SELE       |
| ENSG00000152413 | 2.236143169 | 3.71E-11    | 5.66E-09    | HOMER1     |
| ENSG00000167281 | 2.234975487 | 4.85E-07    | 2.47E-05    | RBFOX3     |
| ENSG00000188996 | 2.234808565 | 0.000602671 | 0.009640514 | HUS1B      |
| ENSG00000223461 | 2.228371131 | 4.85E-05    | 0.001277753 | AC004471.1 |
| ENSG00000117115 | 2.225484495 | 1.55E-06    | 6.82E-05    | PADI2      |
| ENSG00000268355 | 2.224606602 | 1.50E-05    | 0.00048683  | AC243960.3 |
| ENSG00000183484 | 2.216763295 | 2.75E-08    | 2.14E-06    | GPR132     |
| ENSG00000201512 | 2.213360522 | 1.83E-05    | 0.000575873 | SNORA71C   |
| ENSG00000198517 | 2.209204116 | 1.39E-11    | 2.36E-09    | MAFK       |
| ENSG00000198976 | 2.209112307 | 0.000191679 | 0.003960925 | MIR429     |
| ENSG00000228817 | 2.208492497 | 7.81E-05    | 0.001887974 | BACH1-IT2  |
| ENSG00000135604 | 2.208395285 | 2.09E-11    | 3.41E-09    | STX11      |

|                  |             |             |             |            |
|------------------|-------------|-------------|-------------|------------|
| ENSG00000138131  | 2.204660144 | 4.59E-05    | 0.001218503 | LOXL4      |
| ENSG00000269951  | 2.20098242  | 0.000522439 | 0.008622896 | AC090181.2 |
| ENSG00000106328  | 2.199881455 | 8.42E-05    | 0.002012108 | FSCN3      |
| ENSG00000228140  | 2.199620857 | 0.004100895 | 0.040720181 | AL031283.1 |
| ENSG00000222009  | 2.198410619 | 4.16E-11    | 6.28E-09    | BTBD19     |
| ENSG00000183696  | 2.197476233 | 3.39E-13    | 8.14E-11    | UPP1       |
| ENSG00000225217  | 2.196147593 | 8.08E-07    | 3.90E-05    | HSPA7      |
| ENSG00000226261  | 2.193980902 | 0.002064163 | 0.024863869 | AC064836.1 |
| ENSG00000120875  | 2.192895882 | 2.36E-06    | 9.95E-05    | DUSP4      |
| ENSG00000187037  | 2.190768026 | 7.43E-05    | 0.001808967 | GPR141     |
| ENSG00000099625  | 2.189216019 | 1.81E-06    | 7.86E-05    | CBARP      |
| ENSG00000159167  | 2.189168534 | 0.000196966 | 0.004055945 | STC1       |
| ENSG00000080824  | 2.185407059 | 3.96E-16    | 1.94E-13    | HSP90AA1   |
| ENSG00000273237  | 2.180145847 | 5.86E-07    | 2.91E-05    | AC004520.1 |
| ENSG00000269425  | 2.179875904 | 0.00521995  | 0.048301289 | AC104521.1 |
| ENSG00000260604  | 2.177859412 | 3.49E-05    | 0.000977643 | AL590004.4 |
| ENSG00000095752  | 2.176918279 | 1.44E-05    | 0.000471922 | IL11       |
| ENSG00000274536  | 2.176185011 | 1.69E-07    | 9.72E-06    | AL034397.3 |
| ENSG00000166523  | 2.173615281 | 0.000567494 | 0.009208387 | CLEC4E     |
| ENSG00000279386  | 2.171878311 | 0.003976081 | 0.039893037 | AC021106.3 |
| ENSG00000174010  | 2.171043604 | 2.99E-14    | 9.45E-12    | KLHL15     |
| ENSG00000173702  | 2.168522404 | 0.000373965 | 0.006614107 | MUC13      |
| ENSG00000128016  | 2.164634218 | 1.33E-10    | 1.77E-08    | ZFP36      |
| ENSG00000140678  | 2.161945937 | 2.35E-08    | 1.87E-06    | ITGAX      |
| ENSG00000104808  | 2.156781414 | 9.61E-08    | 5.99E-06    | DHDH       |
| ENSG00000180611  | 2.156005766 | 9.70E-09    | 8.45E-07    | MB21D2     |
| ENSG00000230638  | 2.155559549 | 0.001734182 | 0.021768307 | AL445933.1 |
| ENSG00000251194  | 2.154933615 | 7.15E-05    | 0.001753345 | AL133330.1 |
| ENSG00000205869  | 2.151641743 | 0.002257908 | 0.026556514 | KRTAP5-1   |
| ENSG00000125347  | 2.148350201 | 4.42E-15    | 1.74E-12    | IRF1       |
| ENSG00000135750  | 2.143580793 | 1.95E-06    | 8.40E-05    | KCNK1      |
| ENSG00000276107  | 2.142922076 | 4.38E-06    | 0.000170333 | AC037198.2 |
| ENSG00000229656  | 2.142027936 | 0.00029192  | 0.005460824 | AL365203.1 |
| ENSG00000138650  | 2.139932659 | 0.000352202 | 0.006315295 | PCDH10     |
| ENSG00000263050  | 2.137847417 | 5.71E-07    | 2.85E-05    | AC090617.6 |
| ENSG00000184588  | 2.132968791 | 1.08E-11    | 1.93E-09    | PDE4B      |
| ENSG00000223356  | 2.126385981 | 0.000807714 | 0.012156005 | AL590666.1 |
| ENSG00000148841  | 2.122185249 | 7.39E-09    | 6.54E-07    | ITPRIP     |
| ENSG00000260633  | 2.120101223 | 0.002577728 | 0.029104321 | AC010207.1 |
| ENSG00000213085  | 2.117821772 | 0.000333303 | 0.00606018  | CFAP45     |
| ENSG00000241978  | 2.117272624 | 2.78E-05    | 0.000816759 | AKAP2      |
| ENSG00000125462  | 2.110832624 | 0.000856725 | 0.012760381 | C1orf61    |
| ENSG00000179168  | 2.11029331  | 4.19E-05    | 0.001130071 | GGN        |
| ENSG00000140511  | 2.108735283 | 1.98E-07    | 1.12E-05    | HAPLN3     |
| ENSG00000250899  | 2.10815297  | 1.31E-06    | 5.90E-05    | AC125807.2 |
| ENSG00000236269  | 2.103975819 | 0.002039884 | 0.024674517 | ENO1-IT1   |
| ENSG00000177238  | 2.102817265 | 0.001122272 | 0.015756747 | TRIM72     |
| ENSG00000117228  | 2.101114401 | 2.23E-11    | 3.60E-09    | GBP1       |
| ENSG00000264553  | 2.097752461 | 0.000754357 | 0.011479505 | MIR4257    |
| ENSG00000186407  | 2.097574685 | 1.10E-05    | 0.000372718 | CD300E     |
| ENSG00000006555  | 2.097249954 | 3.39E-08    | 2.50E-06    | TTC22      |
| ENSG00000233013  | 2.094080219 | 2.94E-05    | 0.000847654 | FAM157B    |
| ENSG00000236782  | 2.092387396 | 7.33E-05    | 0.001787975 | AL391650.1 |
| ENSG00000163735  | 2.090687969 | 0.000706768 | 0.010908866 | CXCL5      |
| ENSG00000132326  | 2.087052995 | 3.15E-11    | 4.87E-09    | PER2       |
| ENSG00000259083  | 2.083717631 | 2.41E-05    | 0.00073371  | AL132639.3 |
| ENSG00000276853  | 2.0804794   | 0.000218871 | 0.004426206 | AC026124.2 |
| ENSG00000130513  | 2.079692472 | 0.000123869 | 0.002777801 | GDF15      |
| ENSG00000205277  | 2.076587056 | 5.87E-06    | 0.000219206 | MUC12      |
| ENSG00000236567  | 2.075471427 | 4.97E-05    | 0.001304273 | TCF3P1     |
| ENSG00000155090  | 2.073906083 | 2.49E-14    | 8.17E-12    | KLF10      |
| ENSG000000087903 | 2.073407847 | 8.01E-09    | 7.02E-07    | RFX2       |
| ENSG00000270988  | 2.07243307  | 0.004504065 | 0.04354041  | AC019257.2 |
| ENSG00000188404  | 2.072105365 | 1.15E-07    | 7.00E-06    | SELL       |
| ENSG00000229598  | 2.071982895 | 1.98E-06    | 8.48E-05    | PRDX3P1    |
| ENSG00000196136  | 2.071181039 | 8.14E-07    | 3.91E-05    | SERPINA3   |
| ENSG00000198805  | 2.070797658 | 2.25E-09    | 2.24E-07    | PNP        |
| ENSG00000148344  | 2.070035463 | 5.20E-05    | 0.001356082 | PTGES      |
| ENSG00000282572  | 2.06802197  | 6.71E-06    | 0.000245723 | AC215522.2 |
| ENSG00000163220  | 2.067768086 | 2.77E-06    | 0.000114237 | S100A9     |

|                 |             |             |             |              |
|-----------------|-------------|-------------|-------------|--------------|
| ENSG00000108244 | 2.064822737 | 0.000419925 | 0.007268431 | KRT23        |
| ENSG00000152784 | 2.063830321 | 0.000128124 | 0.002863316 | PRDM8        |
| ENSG00000260660 | 2.060518729 | 0.005170653 | 0.047999197 | AC113208.3   |
| ENSG00000106211 | 2.060516385 | 1.48E-10    | 1.91E-08    | HSPB1        |
| ENSG00000137193 | 2.059623922 | 1.23E-10    | 1.65E-08    | PIM1         |
| ENSG00000111837 | 2.05934943  | 2.53E-07    | 1.40E-05    | MAK          |
| ENSG00000275993 | 2.054579888 | 2.72E-06    | 0.000112329 | CU639417.2   |
| ENSG00000139514 | 2.052559639 | 3.60E-06    | 0.000144456 | SLC7A1       |
| ENSG00000122641 | 2.050378112 | 7.37E-08    | 4.72E-06    | INHBA        |
| ENSG00000269906 | 2.048235939 | 1.18E-08    | 1.01E-06    | AL606834.2   |
| ENSG00000187288 | 2.047997781 | 0.002352905 | 0.027511705 | CIDEC        |
| ENSG00000259687 | 2.044596067 | 0.000442699 | 0.007576698 | LINC01220    |
| ENSG00000263718 | 2.043853503 | 2.58E-05    | 0.000768978 | AC068594.1   |
| ENSG00000178752 | 2.043338389 | 0.000156843 | 0.00337993  | ERFE         |
| ENSG00000143514 | 2.042765085 | 2.95E-11    | 4.61E-09    | TP53BP2      |
| ENSG00000235631 | 2.042466232 | 0.001508551 | 0.019550877 | RNF148       |
| ENSG00000277639 | 2.042154642 | 3.11E-06    | 0.000126464 | AC007906.2   |
| ENSG00000171223 | 2.039489885 | 4.80E-09    | 4.38E-07    | JUNB         |
| ENSG00000054598 | 2.038547934 | 0.000223554 | 0.004503373 | FOXC1        |
| ENSG00000263393 | 2.037337726 | 0.00346067  | 0.036074942 | AC011825.2   |
| ENSG00000150347 | 2.032079505 | 6.70E-11    | 9.49E-09    | ARID5B       |
| ENSG00000274021 | 2.031780935 | 1.20E-06    | 5.51E-05    | AC024909.3   |
| ENSG00000005513 | 2.028079772 | 4.45E-05    | 0.00118551  | SOX8         |
| ENSG00000255202 | 2.016566639 | 0.001370717 | 0.018313406 | AL049629.1   |
| ENSG00000164236 | 2.016552893 | 2.56E-06    | 0.000106449 | ANKRD33B     |
| ENSG00000113739 | 2.012548673 | 6.72E-05    | 0.001671606 | STC2         |
| ENSG00000179431 | 2.012317053 | 2.17E-05    | 0.000669643 | FJX1         |
| ENSG00000123689 | 2.009265389 | 5.86E-06    | 0.000219206 | G0S2         |
| ENSG00000180549 | 2.007605    | 0.000165465 | 0.003513218 | FUT7         |
| ENSG00000137309 | 2.005773008 | 2.20E-09    | 2.19E-07    | HMGA1        |
| ENSG00000115963 | 2.003751788 | 3.08E-18    | 2.10E-15    | RND3         |
| ENSG00000143384 | 2.000510147 | 4.43E-19    | 3.59E-16    | MCL1         |
| ENSG00000249138 | 1.999894125 | 2.87E-05    | 0.000834787 | SLED1        |
| ENSG00000129654 | 1.998441156 | 0.003287213 | 0.034758935 | FOXJ1        |
| ENSG00000104783 | 1.994832481 | 0.000123679 | 0.002775941 | KCNN4        |
| ENSG00000179111 | 1.991998608 | 0.000249029 | 0.00484544  | HES7         |
| ENSG00000227036 | 1.991916564 | 0.003287537 | 0.034758935 | LINC00511    |
| ENSG00000256304 | 1.991048682 | 0.000333957 | 0.00606559  | CCDC150P1    |
| ENSG00000176845 | 1.989331356 | 1.29E-08    | 1.09E-06    | METRNL       |
| ENSG00000179292 | 1.987593421 | 6.74E-05    | 0.001675231 | TMEM151A     |
| ENSG00000130844 | 1.98524182  | 4.42E-19    | 3.59E-16    | ZNF331       |
| ENSG00000106236 | 1.983208446 | 1.74E-05    | 0.000553537 | NPTX2        |
| ENSG00000139318 | 1.981917901 | 4.69E-10    | 5.43E-08    | DUSP6        |
| ENSG00000228384 | 1.979596154 | 0.000157818 | 0.003398135 | AC007040.1   |
| ENSG00000140563 | 1.97702334  | 2.85E-05    | 0.000831337 | MCTP2        |
| ENSG00000144476 | 1.970116004 | 4.87E-06    | 0.000187048 | ACKR3        |
| ENSG00000232118 | 1.964911831 | 0.001405065 | 0.018657022 | BACH1-AS1    |
| ENSG00000263624 | 1.96455633  | 9.15E-05    | 0.002155276 | AC055811.1   |
| ENSG00000006747 | 1.964483314 | 0.003063165 | 0.03307854  | SCIN         |
| ENSG00000131196 | 1.963484261 | 3.21E-07    | 1.73E-05    | NFATC1       |
| ENSG00000277632 | 1.961259061 | 6.49E-10    | 7.26E-08    | CCL3         |
| ENSG00000228261 | 1.960208178 | 0.004754048 | 0.045149538 | AL162742.1   |
| ENSG00000099860 | 1.958107704 | 8.35E-10    | 9.14E-08    | GADD45B      |
| ENSG00000104856 | 1.957935687 | 1.12E-07    | 6.84E-06    | RELB         |
| ENSG00000121871 | 1.954671194 | 0.000689206 | 0.010733571 | SLITRK3      |
| ENSG00000160888 | 1.952265797 | 3.33E-14    | 1.02E-11    | IER2         |
| ENSG00000165105 | 1.950746065 | 8.60E-05    | 0.002049004 | RASEF        |
| ENSG00000235677 | 1.948424286 | 0.000622677 | 0.009917731 | NPM1P26      |
| ENSG00000162438 | 1.945080495 | 0.002856742 | 0.031411262 | CTRC         |
| ENSG00000188290 | 1.944800453 | 6.28E-05    | 0.001586425 | HES4         |
| ENSG00000100453 | 1.938661875 | 1.78E-06    | 7.76E-05    | GZMB         |
| ENSG00000235523 | 1.93523154  | 0.000997564 | 0.01438732  | AL135924.2   |
| ENSG00000018280 | 1.93519479  | 2.91E-05    | 0.000841562 | SLC11A1      |
| ENSG00000273319 | 1.933602445 | 6.15E-06    | 0.000228125 | AC058791.1   |
| ENSG00000123685 | 1.932142196 | 2.08E-06    | 8.85E-05    | BATF3        |
| ENSG00000010310 | 1.927394861 | 0.000112057 | 0.002554861 | GIPR         |
| ENSG00000021355 | 1.927117262 | 3.80E-09    | 3.59E-07    | SERPINB1     |
| ENSG00000162747 | 1.92404619  | 0.000180131 | 0.003766054 | FCGR3B       |
| ENSG00000148840 | 1.923589779 | 3.08E-10    | 3.67E-08    | PPRC1        |
| ENSG00000249884 | 1.922391319 | 0.000325693 | 0.005959406 | RNF103-CHMP3 |

|                  |             |             |             |             |
|------------------|-------------|-------------|-------------|-------------|
| ENSG00000265096  | 1.917657544 | 0.000163166 | 0.003490247 | C1QTNF1-AS1 |
| ENSG00000215784  | 1.915221434 | 0.000355977 | 0.006374184 | FAM72D      |
| ENSG00000279541  | 1.913873895 | 2.45E-08    | 1.93E-06    | AC005261.6  |
| ENSG00000283413  | 1.910651672 | 0.001478502 | 0.019296384 | AC008703.1  |
| ENSG00000164736  | 1.910160489 | 0.000102309 | 0.002376456 | SOX17       |
| ENSG00000249741  | 1.907973358 | 0.001579875 | 0.020273728 | AC093890.1  |
| ENSG00000167470  | 1.907051088 | 2.53E-11    | 4.01E-09    | MIDN        |
| ENSG00000119535  | 1.902701519 | 8.12E-06    | 0.00028812  | CSF3R       |
| ENSG00000273812  | 1.898621968 | 0.001614493 | 0.020574474 | BX640514.2  |
| ENSG00000062582  | 1.898220797 | 0.000142804 | 0.003145335 | MRPS24      |
| ENSG00000137571  | 1.895142882 | 0.001370508 | 0.018313406 | SLCO5A1     |
| ENSG00000213694  | 1.894560876 | 4.81E-07    | 2.46E-05    | S1PR3       |
| ENSG00000230914  | 1.892981254 | 0.005339405 | 0.049056726 | AC004840.1  |
| ENSG00000272669  | 1.892893404 | 1.08E-08    | 9.30E-07    | AL021707.6  |
| ENSG00000188211  | 1.892111324 | 9.19E-06    | 0.000322273 | NCR3LG1     |
| ENSG00000280721  | 1.892007506 | 0.001240529 | 0.017021034 | LINC01943   |
| ENSG00000152137  | 1.887790917 | 2.69E-07    | 1.48E-05    | HSPB8       |
| ENSG00000159496  | 1.886766243 | 5.29E-08    | 3.63E-06    | RGL4        |
| ENSG00000238273  | 1.886584152 | 0.001111379 | 0.015654643 | AC108058.1  |
| ENSG00000232803  | 1.885503795 | 0.000299767 | 0.005595881 | SLCO4A1-AS1 |
| ENSG00000273368  | 1.882256241 | 0.004957598 | 0.046588132 | AC006566.1  |
| ENSG00000124159  | 1.879661144 | 0.000696107 | 0.010802154 | MATN4       |
| ENSG00000007350  | 1.878845214 | 0.001459865 | 0.019120472 | TKTL1       |
| ENSG00000224251  | 1.878249368 | 4.46E-06    | 0.000172865 | AL391427.1  |
| ENSG000000071282 | 1.877154998 | 2.00E-06    | 8.54E-05    | LMCD1       |
| ENSG00000162924  | 1.876319276 | 4.29E-11    | 6.40E-09    | REL         |
| ENSG00000275708  | 1.876311442 | 0.004971712 | 0.046670058 | MIR3648-1   |
| ENSG00000096006  | 1.874957863 | 0.002406489 | 0.027862009 | CRISP3      |
| ENSG00000202290  | 1.872657097 | 0.001523601 | 0.019716383 | RNA5SP37    |
| ENSG00000258096  | 1.87157508  | 9.75E-07    | 4.53E-05    | AC025031.2  |
| ENSG00000132334  | 1.86982492  | 5.16E-08    | 3.57E-06    | PTPRE       |
| ENSG00000111912  | 1.869799959 | 7.22E-08    | 4.65E-06    | NCOA7       |
| ENSG00000197714  | 1.867889406 | 5.17E-12    | 9.66E-10    | ZNF460      |
| ENSG00000280138  | 1.867615367 | 2.86E-08    | 2.19E-06    | AC027290.2  |
| ENSG00000173338  | 1.86725123  | 1.89E-07    | 1.08E-05    | KCNK7       |
| ENSG00000116717  | 1.862542641 | 3.07E-12    | 5.90E-10    | GADD45A     |
| ENSG00000274322  | 1.86120666  | 0.000397402 | 0.006948115 | AL136531.2  |
| ENSG00000165030  | 1.859869874 | 2.66E-09    | 2.61E-07    | NFIL3       |
| ENSG00000226091  | 1.858679251 | 0.002207869 | 0.026121914 | LINC00937   |
| ENSG00000010818  | 1.858592175 | 3.98E-09    | 3.72E-07    | HIVEP2      |
| ENSG00000259581  | 1.856966979 | 0.002327216 | 0.027260467 | TYRO3P      |
| ENSG00000250889  | 1.856954084 | 0.000369629 | 0.006546346 | LINC01336   |
| ENSG00000151651  | 1.853989047 | 1.49E-05    | 0.000483891 | ADAM8       |
| ENSG00000212493  | 1.850099645 | 0.00063042  | 0.010004208 | SNORD19     |
| ENSG00000180846  | 1.84949892  | 3.70E-05    | 0.001023665 | CSNK1G2-AS1 |
| ENSG0000010030   | 1.84547271  | 0.000149301 | 0.003260745 | ETV7        |
| ENSG00000100906  | 1.844921379 | 2.20E-12    | 4.42E-10    | NFKBIA      |
| ENSG00000170837  | 1.839335882 | 0.000166555 | 0.003527711 | GPR27       |
| ENSG00000205037  | 1.83883153  | 0.000549378 | 0.008947991 | AC134312.1  |
| ENSG00000138678  | 1.836019813 | 1.58E-08    | 1.30E-06    | GPAT3       |
| ENSG00000254317  | 1.835716612 | 0.005167598 | 0.047988007 | AC022973.4  |
| ENSG00000165507  | 1.834971184 | 3.19E-07    | 1.73E-05    | C10orf10    |
| ENSG00000255874  | 1.834946211 | 1.12E-10    | 1.52E-08    | LINC00346   |
| ENSG00000213145  | 1.834237595 | 0.000101836 | 0.002369714 | CRIP1       |
| ENSG00000279838  | 1.832034384 | 0.000206863 | 0.00423955  | AL356273.3  |
| ENSG00000262001  | 1.831332258 | 7.37E-06    | 0.000266571 | DLGAP1-AS2  |
| ENSG00000173926  | 1.830734557 | 6.25E-05    | 0.001583497 | 3-Mar       |
| ENSG00000124225  | 1.830721453 | 0.000149203 | 0.003260745 | PMEP1A1     |
| ENSG00000119699  | 1.8291655   | 3.42E-07    | 1.83E-05    | TGFB3       |
| ENSG00000242616  | 1.828343356 | 0.000486923 | 0.008129789 | GNG10       |
| ENSG00000104312  | 1.828129075 | 2.89E-14    | 9.26E-12    | RIPK2       |
| ENSG00000171051  | 1.826567821 | 7.42E-06    | 0.000268221 | FPR1        |
| ENSG00000176092  | 1.825253073 | 0.001611915 | 0.020553971 | CRYBG2      |
| ENSG00000142405  | 1.823764639 | 3.84E-05    | 0.001055892 | NLRP12      |
| ENSG00000197921  | 1.823535067 | 0.000715306 | 0.011001781 | HES5        |
| ENSG00000236438  | 1.817262067 | 3.99E-05    | 0.001085266 | FAM157A     |
| ENSG00000168309  | 1.815874573 | 0.000702902 | 0.010862114 | FAM107A     |
| ENSG00000052749  | 1.81355686  | 1.08E-09    | 1.15E-07    | RRP12       |
| ENSG00000234459  | 1.806493662 | 0.005328154 | 0.04898805  | AC002064.2  |
| ENSG00000243404  | 1.805892966 | 0.002554588 | 0.028943817 | AC011276.1  |

|                 |             |             |             |            |
|-----------------|-------------|-------------|-------------|------------|
| ENSG00000178789 | 1.805700302 | 2.82E-05    | 0.000826716 | CD300LB    |
| ENSG00000186352 | 1.804711544 | 2.16E-07    | 1.21E-05    | ANKRD37    |
| ENSG00000257671 | 1.804030011 | 0.001448836 | 0.019043319 | KRT7-AS    |
| ENSG00000183114 | 1.802991639 | 9.52E-05    | 0.002228063 | FAM43B     |
| ENSG00000273076 | 1.796535537 | 0.00040386  | 0.007056264 | AL021707.7 |
| ENSG00000176014 | 1.795578128 | 1.80E-05    | 0.000568759 | TUBB6      |
| ENSG00000145777 | 1.792535689 | 1.98E-07    | 1.12E-05    | TSLP       |
| ENSG00000162783 | 1.789382584 | 7.43E-09    | 6.54E-07    | IER5       |
| ENSG00000113448 | 1.788782568 | 1.68E-09    | 1.72E-07    | PDE4D      |
| ENSG00000272367 | 1.785325869 | 0.000957274 | 0.013891179 | AC018754.1 |
| ENSG00000258086 | 1.782302157 | 3.12E-05    | 0.000886876 | AC079313.1 |
| ENSG00000069812 | 1.78206306  | 0.004458475 | 0.043244706 | HES2       |
| ENSG00000164171 | 1.778496789 | 0.000540001 | 0.008834093 | ITGA2      |
| ENSG00000115828 | 1.776974906 | 1.99E-05    | 0.000620448 | QPCT       |
| ENSG00000123975 | 1.776644872 | 2.46E-09    | 2.44E-07    | CKS2       |
| ENSG00000112773 | 1.776273681 | 7.63E-14    | 2.00E-11    | FAM46A     |
| ENSG00000183742 | 1.77444337  | 0.000213963 | 0.004343887 | MACC1      |
| ENSG00000197329 | 1.774202461 | 1.65E-11    | 2.74E-09    | PELI1      |
| ENSG00000116514 | 1.77240373  | 1.96E-10    | 2.47E-08    | RNF19B     |
| ENSG00000258469 | 1.772227048 | 0.003481518 | 0.036252879 | CHMP4BP1   |
| ENSG00000228340 | 1.768680352 | 0.003124195 | 0.033482187 | MIR646HG   |
| ENSG00000258959 | 1.767594731 | 0.002599554 | 0.029299756 | AL118558.1 |
| ENSG00000235713 | 1.766992271 | 0.000262607 | 0.005062105 | AC004522.1 |
| ENSG00000154099 | 1.762942869 | 0.000170627 | 0.003596328 | DNAAF1     |
| ENSG00000250548 | 1.76280712  | 0.004238828 | 0.04165804  | AL355916.1 |
| ENSG00000186891 | 1.762089699 | 0.00028442  | 0.005363057 | TNFRSF18   |
| ENSG00000280046 | 1.761768355 | 1.38E-05    | 0.000454526 | AC104581.5 |
| ENSG00000162413 | 1.759717907 | 4.52E-09    | 4.17E-07    | KLHL21     |
| ENSG00000135046 | 1.758600822 | 4.80E-08    | 3.37E-06    | ANXA1      |
| ENSG00000262652 | 1.757474971 | 0.001268946 | 0.017299455 | AC124283.3 |
| ENSG00000184205 | 1.756892883 | 7.89E-07    | 3.81E-05    | TSPYL2     |
| ENSG00000179564 | 1.756475821 | 0.000497602 | 0.008265547 | LSMEM2     |
| ENSG00000105205 | 1.756393134 | 0.001213644 | 0.016722892 | CLC        |
| ENSG00000115507 | 1.755047808 | 0.004554577 | 0.043832739 | OTX1       |
| ENSG00000280042 | 1.754677665 | 0.000104685 | 0.002424818 | AC022336.3 |
| ENSG00000158517 | 1.754443614 | 2.10E-05    | 0.000652057 | NCF1       |
| ENSG00000237892 | 1.754417884 | 0.000214367 | 0.004348674 | KLF7-IT1   |
| ENSG00000134571 | 1.753615037 | 1.14E-05    | 0.000385696 | MYBPC3     |
| ENSG00000119121 | 1.752191422 | 6.26E-05    | 0.001583497 | TRPM6      |
| ENSG00000280594 | 1.749938904 | 2.61E-05    | 0.000775284 | BTG3-AS1   |
| ENSG00000196550 | 1.747031764 | 0.000231761 | 0.004600823 | FAM72A     |
| ENSG00000183486 | 1.746923598 | 3.83E-08    | 2.79E-06    | MX2        |
| ENSG00000165732 | 1.742671093 | 7.29E-09    | 6.50E-07    | DDX21      |
| ENSG00000250116 | 1.737690272 | 0.000179192 | 0.003752481 | AC018682.1 |
| ENSG00000140941 | 1.734607324 | 1.09E-14    | 3.81E-12    | MAP1LC3B   |
| ENSG00000164691 | 1.734562081 | 1.24E-06    | 5.65E-05    | TAGAP      |
| ENSG00000027869 | 1.733049666 | 1.34E-05    | 0.000442816 | SH2D2A     |
| ENSG00000254810 | 1.731554901 | 3.98E-05    | 0.001084112 | AP001189.3 |
| ENSG00000236581 | 1.730250861 | 0.000426483 | 0.007352517 | STARD13-AS |
| ENSG00000173530 | 1.729874028 | 2.24E-07    | 1.25E-05    | TNFRSF10D  |
| ENSG00000103313 | 1.729353067 | 1.54E-05    | 0.000496906 | MEFV       |
| ENSG00000279821 | 1.72873658  | 0.000207201 | 0.004239778 | AC145098.2 |
| ENSG00000261644 | 1.728673096 | 2.50E-05    | 0.000752452 | AC007728.2 |
| ENSG00000204618 | 1.726385183 | 0.000189211 | 0.003927047 | RNF39      |
| ENSG00000182687 | 1.721001675 | 0.000324788 | 0.005947031 | GALR2      |
| ENSG00000163132 | 1.720134838 | 7.62E-06    | 0.000273448 | MSX1       |
| ENSG00000224080 | 1.718968986 | 3.53E-06    | 0.000142052 | UBE2FP1    |
| ENSG00000171056 | 1.715115407 | 6.09E-07    | 3.02E-05    | SOX7       |
| ENSG00000140332 | 1.710126373 | 6.40E-08    | 4.22E-06    | TLE3       |
| ENSG00000145632 | 1.710087236 | 1.75E-11    | 2.89E-09    | PLK2       |
| ENSG00000076662 | 1.705067569 | 0.001307234 | 0.017665356 | ICAM3      |
| ENSG00000115758 | 1.704760472 | 2.39E-08    | 1.89E-06    | ODC1       |
| ENSG00000232934 | 1.703854218 | 2.61E-05    | 0.000775284 | AL157786.1 |
| ENSG00000109943 | 1.703497111 | 0.0004078   | 0.007096423 | CRTAM      |
| ENSG00000053524 | 1.697663008 | 0.00096338  | 0.013964624 | MCF2L2     |
| ENSG00000077150 | 1.694900538 | 3.17E-09    | 3.08E-07    | NFKB2      |
| ENSG00000255176 | 1.693672295 | 0.00223582  | 0.026356472 | AP000941.1 |
| ENSG00000173451 | 1.693671617 | 6.75E-06    | 0.000246668 | THAP2      |
| ENSG00000236304 | 1.69252213  | 0.000170167 | 0.00358955  | AP001189.1 |
| ENSG00000096384 | 1.691143079 | 5.72E-14    | 1.62E-11    | HSP90AB1   |

|                 |             |             |             |            |
|-----------------|-------------|-------------|-------------|------------|
| ENSG00000277595 | 1.690446794 | 0.000255928 | 0.004959148 | AC007546.1 |
| ENSG00000233030 | 1.688804431 | 0.000407489 | 0.007096423 | AC243772.2 |
| ENSG00000131873 | 1.688598159 | 6.21E-08    | 4.14E-06    | CHSY1      |
| ENSG00000167604 | 1.685920423 | 4.61E-08    | 3.24E-06    | NFKBID     |
| ENSG00000023330 | 1.682240323 | 7.01E-08    | 4.52E-06    | ALAS1      |
| ENSG00000104892 | 1.682064027 | 0.001355355 | 0.018164271 | KLC3       |
| ENSG00000164070 | 1.68085433  | 7.89E-06    | 0.000282485 | HSPA4L     |
| ENSG00000258227 | 1.679568308 | 0.000706124 | 0.010905418 | CLEC5A     |
| ENSG00000110172 | 1.677746102 | 2.18E-08    | 1.76E-06    | CHORDC1    |
| ENSG00000114541 | 1.676924889 | 1.09E-10    | 1.49E-08    | FRMD4B     |
| ENSG00000233578 | 1.67652246  | 0.003286175 | 0.034758935 | EIF4EP1    |
| ENSG00000284669 | 1.676517798 | 6.29E-05    | 0.001586819 | AC092053.3 |
| ENSG00000131188 | 1.67600038  | 6.75E-05    | 0.001675893 | PRR7       |
| ENSG00000132003 | 1.675931661 | 4.00E-06    | 0.000157567 | ZSWIM4     |
| ENSG00000188910 | 1.675604763 | 2.16E-06    | 9.15E-05    | GJB3       |
| ENSG00000181409 | 1.675003204 | 6.96E-05    | 0.001715259 | AATK       |
| ENSG00000235852 | 1.674789604 | 0.00106637  | 0.01516006  | AC005540.1 |
| ENSG00000117479 | 1.674632788 | 1.00E-07    | 6.22E-06    | SLC19A2    |
| ENSG00000167207 | 1.67336607  | 9.97E-07    | 4.62E-05    | NOD2       |
| ENSG00000070729 | 1.670734792 | 0.003739628 | 0.038080217 | CNGB1      |
| ENSG00000262147 | 1.667948281 | 0.000349949 | 0.0062923   | AC124283.2 |
| ENSG00000142513 | 1.667824309 | 0.003875116 | 0.039030966 | ACP4       |
| ENSG00000122035 | 1.66492957  | 3.32E-09    | 3.20E-07    | RASL11A    |
| ENSG00000065911 | 1.662527365 | 3.12E-05    | 0.000886876 | MTHFD2     |
| ENSG00000272512 | 1.662310796 | 0.003378578 | 0.035393364 | AL645608.8 |
| ENSG00000127528 | 1.659979209 | 0.000421676 | 0.007289009 | KLF2       |
| ENSG00000213089 | 1.658853159 | 0.000602443 | 0.009640514 | PDCL3P5    |
| ENSG00000222937 | 1.658220986 | 5.41E-05    | 0.001405079 | SNORD63B   |
| ENSG00000110218 | 1.657630524 | 6.61E-08    | 4.31E-06    | PANX1      |
| ENSG00000143367 | 1.654646122 | 6.90E-08    | 4.47E-06    | TUFT1      |
| ENSG00000279863 | 1.653831602 | 1.00E-05    | 0.000346034 | AC069547.1 |
| ENSG00000124466 | 1.653804548 | 1.49E-06    | 6.60E-05    | LYPD3      |
| ENSG00000130751 | 1.653578612 | 0.003527342 | 0.036545592 | NPAS1      |
| ENSG00000274911 | 1.651963916 | 0.004266422 | 0.04185126  | AL627230.2 |
| ENSG00000134070 | 1.651088604 | 1.27E-08    | 1.08E-06    | IRAK2      |
| ENSG00000237499 | 1.650536396 | 2.09E-06    | 8.86E-05    | AL357060.2 |
| ENSG00000198754 | 1.649261919 | 0.002004172 | 0.024333294 | OXCT2      |
| ENSG00000115590 | 1.646970534 | 0.000568066 | 0.009211906 | IL1R2      |
| ENSG00000122862 | 1.646737917 | 2.48E-07    | 1.38E-05    | SRGN       |
| ENSG00000135114 | 1.6458306   | 8.62E-08    | 5.45E-06    | OASL       |
| ENSG00000134107 | 1.645798467 | 4.40E-08    | 3.13E-06    | BHLHE40    |
| ENSG00000154710 | 1.644714479 | 3.10E-07    | 1.68E-05    | RABGEF1    |
| ENSG00000103966 | 1.642571762 | 3.97E-08    | 2.86E-06    | EHD4       |
| ENSG00000160789 | 1.642183024 | 1.53E-09    | 1.58E-07    | LMNA       |
| ENSG00000125848 | 1.641549093 | 2.05E-06    | 8.72E-05    | FLRT3      |
| ENSG00000253406 | 1.635903293 | 0.000179158 | 0.003752481 | AC012613.2 |
| ENSG00000225614 | 1.635400218 | 0.000263493 | 0.005071651 | ZNF469     |
| ENSG00000178860 | 1.63208293  | 0.0001464   | 0.00320819  | MSC        |
| ENSG00000139722 | 1.630398752 | 6.71E-08    | 4.37E-06    | VPS37B     |
| ENSG00000164251 | 1.626645406 | 8.04E-06    | 0.000286442 | F2RL1      |
| ENSG00000157557 | 1.625387084 | 8.85E-10    | 9.61E-08    | ETS2       |
| ENSG00000161960 | 1.620846156 | 1.40E-06    | 6.21E-05    | EIF4A1     |
| ENSG00000197261 | 1.618949296 | 0.002194974 | 0.026016815 | C6orf141   |
| ENSG00000249661 | 1.618541731 | 1.49E-05    | 0.000483891 | TNRC18P1   |
| ENSG00000088826 | 1.616825574 | 0.000261394 | 0.005046232 | SMOX       |
| ENSG00000115194 | 1.614293009 | 0.00088082  | 0.013044387 | SLC30A3    |
| ENSG00000280385 | 1.610501182 | 7.84E-07    | 3.80E-05    | AP000648.3 |
| ENSG00000175040 | 1.610252142 | 2.57E-05    | 0.000767195 | CHST2      |
| ENSG00000131015 | 1.607996228 | 0.000116703 | 0.002642222 | ULBP2      |
| ENSG00000267325 | 1.607849811 | 0.000617388 | 0.009851625 | LINC01415  |
| ENSG00000263606 | 1.607051134 | 6.79E-05    | 0.001681803 | AP000919.1 |
| ENSG00000178381 | 1.606794333 | 7.64E-08    | 4.88E-06    | ZFAND2A    |
| ENSG00000260528 | 1.605322266 | 0.000166375 | 0.003526776 | FAM157C    |
| ENSG00000188215 | 1.603907626 | 5.29E-11    | 7.72E-09    | DCUN1D3    |
| ENSG00000112303 | 1.601110238 | 0.000105802 | 0.00244012  | VNN2       |
| ENSG00000223776 | 1.598659748 | 0.000473775 | 0.007982183 | LGALS8-AS1 |
| ENSG00000154479 | 1.595801378 | 0.000905509 | 0.013273635 | CCDC173    |
| ENSG00000206989 | 1.594798797 | 2.66E-05    | 0.000786472 | SNORD63    |
| ENSG00000258441 | 1.593121526 | 1.26E-06    | 5.69E-05    | LINC00641  |
| ENSG00000034152 | 1.593023667 | 2.01E-09    | 2.01E-07    | MAP2K3     |



|                 |             |             |             |            |
|-----------------|-------------|-------------|-------------|------------|
| ENSG00000183199 | 1.591567964 | 3.74E-06    | 0.000149088 | AC093768.1 |
| ENSG00000254027 | 1.587898039 | 0.001911858 | 0.02343177  | AC009902.2 |
| ENSG00000163563 | 1.587239011 | 0.000327035 | 0.005971328 | MNDA       |
| ENSG00000235529 | 1.587110578 | 0.004353076 | 0.042464738 | AGAP1-IT1  |
| ENSG00000149257 | 1.585563028 | 3.18E-08    | 2.38E-06    | SERPINH1   |
| ENSG00000060138 | 1.584607207 | 1.95E-06    | 8.40E-05    | YBX3       |
| ENSG00000275385 | 1.583619016 | 0.000245907 | 0.004818961 | CCL18      |
| ENSG00000248099 | 1.582534316 | 0.001313163 | 0.017727021 | INSL3      |
| ENSG00000108700 | 1.582217603 | 0.003493369 | 0.036294208 | CCL8       |
| ENSG00000279447 | 1.580042042 | 0.004766086 | 0.045247302 | AL118508.4 |
| ENSG00000165807 | 1.57820892  | 0.004237326 | 0.04165804  | PPP1R36    |
| ENSG00000137265 | 1.577855912 | 0.00199469  | 0.024286361 | IRF4       |
| ENSG00000167106 | 1.57777063  | 3.28E-07    | 1.76E-05    | FAM102A    |
| ENSG00000105656 | 1.576479384 | 3.38E-09    | 3.25E-07    | ELL        |
| ENSG00000264947 | 1.575980551 | 0.001205801 | 0.016659064 | MIR3181    |
| ENSG00000100368 | 1.574625188 | 0.000119852 | 0.00270173  | CSF2RB     |
| ENSG00000125772 | 1.574585284 | 1.31E-08    | 1.10E-06    | GPCPD1     |
| ENSG00000237437 | 1.573851657 | 0.000310908 | 0.005741512 | ASS1P12    |
| ENSG00000233203 | 1.569740429 | 0.005109212 | 0.047602752 | AC096536.1 |
| ENSG00000254873 | 1.569419669 | 0.004001634 | 0.0400256   | AP001267.1 |
| ENSG00000127124 | 1.567304739 | 2.59E-05    | 0.000770462 | HIVEP3     |
| ENSG00000188064 | 1.566918674 | 0.001758697 | 0.022001514 | WNT7B      |
| ENSG00000154553 | 1.566160243 | 3.62E-05    | 0.001008879 | PDLIM3     |
| ENSG00000023445 | 1.564061597 | 0.001864498 | 0.023015023 | BIRC3      |
| ENSG00000196396 | 1.563737811 | 6.08E-11    | 8.71E-09    | PTPN1      |
| ENSG00000248476 | 1.561955329 | 0.003086823 | 0.033191344 | BACH1-IT1  |
| ENSG00000103257 | 1.561432431 | 1.35E-07    | 8.01E-06    | SLC7A5     |
| ENSG00000162892 | 1.560466248 | 0.000789443 | 0.01193641  | IL24       |
| ENSG00000117090 | 1.559457483 | 0.000463916 | 0.007862023 | SLAMF1     |
| ENSG00000212452 | 1.559307794 | 0.001437077 | 0.018936714 | SNORD69    |
| ENSG00000270120 | 1.558866206 | 0.002682142 | 0.029970223 | AC007728.3 |
| ENSG00000115956 | 1.557599886 | 5.62E-06    | 0.00021142  | PLEK       |
| ENSG00000189143 | 1.55694032  | 0.000856581 | 0.012760381 | CLDN4      |
| ENSG00000204165 | 1.556668568 | 0.002369288 | 0.027633641 | CXorf65    |
| ENSG00000117036 | 1.554594343 | 1.26E-11    | 2.20E-09    | ETV3       |
| ENSG00000205336 | 1.554490273 | 5.88E-05    | 0.0015008   | ADGRG1     |
| ENSG00000249992 | 1.551602885 | 6.40E-05    | 0.00160803  | TMEM158    |
| ENSG00000121101 | 1.551035517 | 1.64E-05    | 0.000524539 | TEX14      |
| ENSG00000101307 | 1.549091756 | 0.000532455 | 0.008752318 | SIRPB1     |
| ENSG00000167103 | 1.5486488   | 0.000145107 | 0.003187924 | PIP5KL1    |
| ENSG00000259863 | 1.546604711 | 0.000374304 | 0.0066156   | SH3RF3-AS1 |
| ENSG00000198142 | 1.544751424 | 1.03E-07    | 6.40E-06    | SOWAHC     |
| ENSG00000145780 | 1.542990294 | 5.11E-13    | 1.17E-10    | FEM1C      |
| ENSG00000232043 | 1.542354658 | 2.81E-05    | 0.000825037 | AL133230.1 |
| ENSG00000140406 | 1.540127749 | 1.73E-05    | 0.000552936 | TLNRD1     |
| ENSG00000181826 | 1.536667321 | 4.83E-08    | 3.38E-06    | RELL1      |
| ENSG00000165195 | 1.534812337 | 7.00E-10    | 7.79E-08    | PIGA       |
| ENSG00000168298 | 1.534719554 | 0.001388793 | 0.018507258 | HIST1H1E   |
| ENSG00000118194 | 1.531686138 | 0.00187689  | 0.023123355 | TNNT2      |
| ENSG00000184012 | 1.529146585 | 4.58E-08    | 3.23E-06    | TMPRSS2    |
| ENSG00000259583 | 1.529076624 | 0.003831328 | 0.038755601 | AC015712.2 |
| ENSG00000265136 | 1.528037822 | 4.61E-05    | 0.001222979 | AC124283.4 |
| ENSG00000163492 | 1.527195947 | 0.00451547  | 0.043625392 | CCDC141    |
| ENSG00000077984 | 1.526859147 | 3.79E-06    | 0.000150279 | CST7       |
| ENSG00000154537 | 1.526779411 | 0.003490322 | 0.036294208 | FAM27C     |
| ENSG00000123405 | 1.525085875 | 0.000828495 | 0.012389707 | NFE2       |
| ENSG00000156273 | 1.524776997 | 2.91E-10    | 3.48E-08    | BACH1      |
| ENSG00000105835 | 1.524203009 | 9.19E-08    | 5.76E-06    | NAMPT      |
| ENSG00000283199 | 1.523374527 | 0.000159374 | 0.003425953 | FP565324.1 |
| ENSG00000129226 | 1.522245716 | 0.000273345 | 0.005222546 | CD68       |
| ENSG00000143322 | 1.51930863  | 6.43E-08    | 4.24E-06    | ABL2       |
| ENSG00000272610 | 1.517053284 | 0.003654414 | 0.03743055  | MAGI1-IT1  |
| ENSG00000235750 | 1.516882024 | 7.66E-07    | 3.71E-05    | KIAA0040   |
| ENSG00000227200 | 1.516066697 | 0.005025265 | 0.047007821 | AL162724.1 |
| ENSG00000120063 | 1.515542862 | 1.31E-11    | 2.26E-09    | GNA13      |
| ENSG00000144031 | 1.512164877 | 4.50E-08    | 3.19E-06    | ANKRD53    |
| ENSG00000229644 | 1.511818313 | 5.52E-06    | 0.000207889 | NAMPTP1    |
| ENSG00000182752 | 1.511719906 | 0.001735228 | 0.021770899 | PAPPA      |
| ENSG00000278434 | 1.511649003 | 0.002411726 | 0.027897749 | AC023830.3 |
| ENSG00000223403 | 1.510158791 | 4.35E-05    | 0.001166794 | MEG9       |

|                 |             |             |             |               |
|-----------------|-------------|-------------|-------------|---------------|
| ENSG00000197905 | 1.506179309 | 0.000167655 | 0.003548098 | TEAD4         |
| ENSG00000095794 | 1.50389926  | 1.39E-10    | 1.83E-08    | CREM          |
| ENSG00000241163 | 1.503496631 | 5.23E-05    | 0.00136354  | LINC00877     |
| ENSG00000265907 | 1.502769394 | 0.001179759 | 0.016369004 | AP000919.2    |
| ENSG00000104804 | 1.502018866 | 0.00464502  | 0.044439415 | TULP2         |
| ENSG00000236060 | 1.501572149 | 0.000154751 | 0.003348766 | HSPB1P1       |
| ENSG00000273604 | 1.5007037   | 1.02E-05    | 0.000349367 | EPOP          |
| ENSG00000163602 | 1.50060452  | 6.59E-13    | 1.50E-10    | RYBP          |
| ENSG00000204390 | 1.500109794 | 1.25E-06    | 5.67E-05    | HSPA1L        |
| ENSG00000150991 | 1.500053329 | 5.06E-13    | 1.17E-10    | UBC           |
| ENSG00000184378 | 1.499686481 | 4.80E-07    | 2.45E-05    | ACTRT3        |
| ENSG00000232956 | 1.498284905 | 8.22E-06    | 0.000291071 | SNHG15        |
| ENSG00000126368 | 1.496222514 | 1.58E-06    | 6.94E-05    | NR1D1         |
| ENSG00000158406 | 1.495156101 | 0.000882725 | 0.013065129 | HIST1H4H      |
| ENSG00000169155 | 1.494722503 | 4.32E-08    | 3.09E-06    | ZBTB43        |
| ENSG00000144802 | 1.494423107 | 3.24E-08    | 2.40E-06    | NFKBIZ        |
| ENSG00000223956 | 1.493176719 | 0.00065593  | 0.010320656 | LINC01767     |
| ENSG00000101096 | 1.491855552 | 3.54E-07    | 1.88E-05    | NFATC2        |
| ENSG00000036672 | 1.490453807 | 2.95E-05    | 0.000849535 | USP2          |
| ENSG00000130477 | 1.489397419 | 0.004489666 | 0.043456439 | UNC13A        |
| ENSG00000237232 | 1.488055699 | 0.000377578 | 0.006659851 | ZNF295-AS1    |
| ENSG00000274026 | 1.487305249 | 0.000813511 | 0.01220078  | FAM27E3       |
| ENSG00000164778 | 1.486808112 | 0.001905816 | 0.023390868 | EN2           |
| ENSG00000180530 | 1.486087848 | 1.75E-05    | 0.000555108 | NR1P1         |
| ENSG00000185947 | 1.485823923 | 1.48E-08    | 1.23E-06    | ZNF267        |
| ENSG00000145491 | 1.485153468 | 0.001605854 | 0.020504675 | ROPN1L        |
| ENSG00000260196 | 1.484683166 | 0.000647458 | 0.010212119 | AC124798.1    |
| ENSG00000188389 | 1.484226865 | 0.004220828 | 0.041558771 | PDCD1         |
| ENSG00000166197 | 1.480189369 | 4.22E-09    | 3.93E-07    | NOLC1         |
| ENSG00000196352 | 1.474386789 | 4.37E-07    | 2.28E-05    | CD55          |
| ENSG00000136158 | 1.473109561 | 1.70E-08    | 1.39E-06    | SPRY2         |
| ENSG00000117152 | 1.472935757 | 0.00031241  | 0.005761037 | RGS4          |
| ENSG00000100036 | 1.471081157 | 7.25E-05    | 0.001772284 | SLC35E4       |
| ENSG00000144381 | 1.470749212 | 1.45E-09    | 1.51E-07    | HSPD1         |
| ENSG00000110047 | 1.467585523 | 8.02E-08    | 5.11E-06    | EHD1          |
| ENSG00000055483 | 1.466729441 | 1.91E-12    | 3.93E-10    | USP36         |
| ENSG00000156127 | 1.462385304 | 6.34E-05    | 0.001595997 | BATF          |
| ENSG00000166106 | 1.46020066  | 0.000147621 | 0.003232216 | ADAMTS15      |
| ENSG00000006062 | 1.459440254 | 9.61E-11    | 1.33E-08    | MAP3K14       |
| ENSG00000258667 | 1.457274969 | 0.005378381 | 0.049292647 | HIF1A-AS2     |
| ENSG00000244161 | 1.455765497 | 0.00020452  | 0.004194843 | FLNB-AS1      |
| ENSG00000120129 | 1.455758772 | 0.000963412 | 0.013964624 | DUSP1         |
| ENSG00000140297 | 1.455742355 | 0.002815864 | 0.031099518 | GCNT3         |
| ENSG00000233029 | 1.455656904 | 0.003652353 | 0.03743055  | AC244453.2    |
| ENSG00000241886 | 1.454980841 | 0.003414726 | 0.035667667 | AC112496.1    |
| ENSG00000109846 | 1.454596132 | 2.85E-05    | 0.000831337 | CRYAB         |
| ENSG00000117877 | 1.454353953 | 8.08E-05    | 0.001939432 | CD3EAP        |
| ENSG00000230724 | 1.452435541 | 0.00057729  | 0.009326501 | LINC01001     |
| ENSG00000177875 | 1.450568344 | 0.001862788 | 0.023015023 | CCDC184       |
| ENSG00000118985 | 1.450441757 | 2.50E-07    | 1.39E-05    | ELL2          |
| ENSG00000253250 | 1.449864686 | 0.002793455 | 0.030934266 | C8orf88       |
| ENSG00000185467 | 1.449086966 | 0.002438449 | 0.028118318 | KPNA7         |
| ENSG00000141526 | 1.448820922 | 0.000238009 | 0.004699682 | SLC16A3       |
| ENSG00000006652 | 1.447380941 | 4.47E-13    | 1.06E-10    | IFRD1         |
| ENSG00000267216 | 1.446895467 | 0.000428545 | 0.007378262 | AC020915.2    |
| ENSG00000022567 | 1.446045877 | 0.000102159 | 0.002375115 | SLC45A4       |
| ENSG00000230701 | 1.444941034 | 0.000111537 | 0.00254524  | FBXW4P1       |
| ENSG00000100226 | 1.443090678 | 1.18E-11    | 2.09E-09    | GTPBP1        |
| ENSG00000107968 | 1.442195375 | 2.85E-07    | 1.57E-05    | MAP3K8        |
| ENSG00000111981 | 1.441344062 | 0.001893275 | 0.023280997 | ULBP1         |
| ENSG00000230149 | 1.439487527 | 0.000254483 | 0.004934831 | AL021707.3    |
| ENSG00000110848 | 1.436226734 | 0.002196135 | 0.026018688 | CD69          |
| ENSG00000143226 | 1.436016456 | 3.22E-05    | 0.000912325 | FCGR2A        |
| ENSG00000100401 | 1.436005593 | 5.92E-06    | 0.000220617 | RANGAP1       |
| ENSG00000181026 | 1.436004584 | 9.47E-07    | 4.44E-05    | AEN           |
| ENSG00000253930 | 1.43591452  | 0.000209267 | 0.004268582 | TNFRSF10A-AS1 |
| ENSG00000102393 | 1.435205822 | 3.91E-08    | 2.84E-06    | GLA           |
| ENSG00000185046 | 1.435067215 | 0.001467343 | 0.019189357 | ANKS1B        |
| ENSG00000109320 | 1.433376091 | 3.96E-08    | 2.86E-06    | NFKB1         |
| ENSG00000168386 | 1.432632621 | 3.19E-06    | 0.000129329 | FILIP1L       |

|                 |             |             |             |            |
|-----------------|-------------|-------------|-------------|------------|
| ENSG00000157551 | 1.432443566 | 0.002385429 | 0.027741971 | KCNJ15     |
| ENSG00000122733 | 1.431703979 | 0.001436971 | 0.018936714 | PHF24      |
| ENSG00000184274 | 1.430168797 | 0.003156096 | 0.03374045  | LINC00315  |
| ENSG00000132475 | 1.428733494 | 6.30E-14    | 1.73E-11    | H3F3B      |
| ENSG00000196189 | 1.426771455 | 6.29E-05    | 0.001586819 | SEMA4A     |
| ENSG00000175556 | 1.426116618 | 3.32E-10    | 3.93E-08    | LONRF3     |
| ENSG00000215910 | 1.426071396 | 0.002678163 | 0.029964475 | C1orf167   |
| ENSG00000154548 | 1.425584176 | 0.000953058 | 0.013845494 | SRSF12     |
| ENSG00000130449 | 1.422671005 | 8.73E-07    | 4.14E-05    | ZSWIM6     |
| ENSG00000148154 | 1.420263137 | 1.79E-09    | 1.82E-07    | UGCG       |
| ENSG00000139438 | 1.419173994 | 1.48E-05    | 0.000480823 | FAM222A    |
| ENSG00000107130 | 1.41896172  | 1.45E-05    | 0.00047244  | NCS1       |
| ENSG00000246334 | 1.417923357 | 0.000329385 | 0.006010007 | PRR7-AS1   |
| ENSG00000266970 | 1.417512914 | 0.002404374 | 0.027862009 | AC061992.1 |
| ENSG00000008056 | 1.41724394  | 0.001320487 | 0.017807352 | SYN1       |
| ENSG00000238018 | 1.415829953 | 0.001839217 | 0.022789082 | AC093110.1 |
| ENSG00000090376 | 1.414600069 | 5.62E-05    | 0.001451166 | IRAK3      |
| ENSG00000271303 | 1.4142326   | 1.47E-06    | 6.53E-05    | SRXN1      |
| ENSG00000089558 | 1.413877559 | 0.001507792 | 0.019550813 | KCNH4      |
| ENSG00000177426 | 1.413736472 | 1.31E-10    | 1.75E-08    | TGIF1      |
| ENSG00000135074 | 1.41136101  | 1.02E-05    | 0.000349483 | ADAM19     |
| ENSG00000278330 | 1.409668425 | 3.88E-05    | 0.001063531 | AC018529.2 |
| ENSG00000141384 | 1.408738794 | 0.003591983 | 0.036953847 | TAF4B      |
| ENSG00000054967 | 1.407211255 | 8.02E-06    | 0.000286393 | RELT       |
| ENSG00000008405 | 1.40625217  | 3.03E-07    | 1.65E-05    | CRY1       |
| ENSG00000180616 | 1.406119507 | 8.87E-07    | 4.20E-05    | SSTR2      |
| ENSG00000138685 | 1.403336258 | 0.000158169 | 0.003402865 | FGF2       |
| ENSG00000104885 | 1.402929633 | 2.02E-06    | 8.62E-05    | DOT1L      |
| ENSG00000143479 | 1.398791646 | 1.12E-07    | 6.84E-06    | DYRK3      |
| ENSG00000164741 | 1.397259309 | 4.64E-10    | 5.40E-08    | DLC1       |
| ENSG00000163545 | 1.396128798 | 1.26E-06    | 5.69E-05    | NUAK2      |
| ENSG00000176928 | 1.393416636 | 0.000164671 | 0.003506527 | GCNT4      |
| ENSG00000196878 | 1.393401182 | 7.06E-05    | 0.001735617 | LAMB3      |
| ENSG00000111424 | 1.390360938 | 0.000339055 | 0.006147532 | VDR        |
| ENSG00000231964 | 1.390308049 | 0.005047508 | 0.047159759 | AL731567.1 |
| ENSG00000258317 | 1.389366431 | 0.000966764 | 0.014005397 | AC034102.6 |
| ENSG00000137507 | 1.386952365 | 5.74E-05    | 0.001477071 | LRRC32     |
| ENSG00000086061 | 1.385081616 | 4.98E-08    | 3.48E-06    | DNAJA1     |
| ENSG00000105321 | 1.384808026 | 3.69E-10    | 4.31E-08    | CCDC9      |
| ENSG00000237624 | 1.384190532 | 0.003563162 | 0.03671742  | OXCT2P1    |
| ENSG00000187775 | 1.383115688 | 9.92E-07    | 4.61E-05    | DNAH17     |
| ENSG00000104951 | 1.379907355 | 0.002982735 | 0.032448654 | IL4I1      |
| ENSG00000276600 | 1.379220555 | 0.001593059 | 0.020391472 | RAB7B      |
| ENSG00000163660 | 1.3766799   | 1.28E-11    | 2.21E-09    | CCNL1      |
| ENSG00000143878 | 1.376462065 | 4.15E-07    | 2.18E-05    | RHOB       |
| ENSG00000130821 | 1.376454656 | 0.005306229 | 0.048855723 | SLC6A8     |
| ENSG00000169252 | 1.374156882 | 3.42E-06    | 0.000138221 | ADR2       |
| ENSG00000164867 | 1.369102767 | 0.000242753 | 0.004767946 | NOS3       |
| ENSG00000078804 | 1.368907001 | 1.50E-09    | 1.56E-07    | TP53NP2    |
| ENSG00000211574 | 1.36695467  | 0.003126624 | 0.033494375 | MIR770     |
| ENSG00000100678 | 1.366489657 | 0.002120633 | 0.025379121 | SLC8A3     |
| ENSG00000197208 | 1.364715288 | 2.83E-05    | 0.000828182 | SLC22A4    |
| ENSG00000136383 | 1.364677086 | 0.000547779 | 0.008933163 | ALPK3      |
| ENSG00000237181 | 1.36219748  | 8.79E-05    | 0.002085993 | AC147651.3 |
| ENSG00000158615 | 1.359513817 | 1.23E-09    | 1.30E-07    | PPP1R15B   |
| ENSG00000263675 | 1.35936765  | 0.004389023 | 0.042730804 | MIR5581    |
| ENSG00000214193 | 1.359365019 | 4.39E-05    | 0.001171984 | SH3D21     |
| ENSG00000158792 | 1.356539411 | 1.13E-05    | 0.000381902 | SPATA2L    |
| ENSG00000160223 | 1.355851354 | 0.001227663 | 0.016878063 | ICOSLG     |
| ENSG00000256694 | 1.355357603 | 0.001209334 | 0.0166901   | AC026369.2 |
| ENSG00000176788 | 1.354015437 | 3.67E-05    | 0.001019615 | BASP1      |
| ENSG00000200913 | 1.351942761 | 0.00374372  | 0.038106924 | SNORD46    |
| ENSG00000123146 | 1.35054575  | 1.02E-05    | 0.000348894 | ADGRE5     |
| ENSG00000167995 | 1.34984223  | 7.87E-05    | 0.001899039 | BEST1      |
| ENSG00000235151 | 1.349263077 | 0.002442229 | 0.028123241 | AC131097.4 |
| ENSG00000154153 | 1.348975834 | 0.000246682 | 0.004819583 | RETREG1    |
| ENSG00000280303 | 1.348890577 | 0.00415488  | 0.041135528 | AC067931.2 |
| ENSG00000112033 | 1.347548715 | 9.15E-06    | 0.000321733 | PPARD      |
| ENSG00000259207 | 1.346995506 | 0.000257776 | 0.00498379  | ITGB3      |
| ENSG00000073737 | 1.345938785 | 0.000880715 | 0.013044387 | DHRS9      |

|                 |             |             |             |            |
|-----------------|-------------|-------------|-------------|------------|
| ENSG0000067334  | 1.345052851 | 1.12E-11    | 2.00E-09    | DNTTIP2    |
| ENSG00000229808 | 1.344888639 | 0.000263021 | 0.005066326 | AL391825.1 |
| ENSG00000116991 | 1.344596697 | 0.001090508 | 0.015444498 | SIPA1L2    |
| ENSG00000163121 | 1.343283254 | 0.002131404 | 0.025469147 | NEURL3     |
| ENSG00000141448 | 1.342902727 | 5.59E-08    | 3.80E-06    | GATA6      |
| ENSG00000166401 | 1.342656459 | 2.56E-06    | 0.000106449 | SERPINB8   |
| ENSG00000154640 | 1.342556151 | 3.35E-08    | 2.48E-06    | BTG3       |
| ENSG00000255150 | 1.340459993 | 1.33E-05    | 0.000440463 | EID3       |
| ENSG00000143867 | 1.340372251 | 0.00489863  | 0.046201325 | OSR1       |
| ENSG00000275183 | 1.336363986 | 9.52E-07    | 4.44E-05    | LENG9      |
| ENSG00000123908 | 1.330891105 | 4.10E-07    | 2.16E-05    | AGO2       |
| ENSG00000174946 | 1.32965155  | 0.004730737 | 0.044977539 | GPR171     |
| ENSG00000100079 | 1.329263141 | 0.004420582 | 0.042957457 | LGALS2     |
| ENSG00000166900 | 1.327004873 | 4.25E-08    | 3.05E-06    | STX3       |
| ENSG00000171786 | 1.325762214 | 0.003685794 | 0.03767792  | NHLH1      |
| ENSG00000164674 | 1.325145729 | 3.87E-05    | 0.001060902 | SYTL3      |
| ENSG00000196843 | 1.32512521  | 3.84E-06    | 0.00015192  | ARID5A     |
| ENSG00000101187 | 1.322052842 | 0.000765054 | 0.011635459 | SLCO4A1    |
| ENSG00000267632 | 1.321064519 | 0.002528954 | 0.028744545 | AC067852.6 |
| ENSG00000268903 | 1.319413372 | 0.001113783 | 0.015662986 | AL627309.7 |
| ENSG00000109819 | 1.319044426 | 0.000105256 | 0.002431856 | PPARGC1A   |
| ENSG00000269981 | 1.318764158 | 0.001456382 | 0.019107953 | AL627309.8 |
| ENSG00000148926 | 1.318159175 | 0.000366014 | 0.006506898 | ADM        |
| ENSG00000148339 | 1.316987142 | 4.43E-06    | 0.000171755 | SLC25A25   |
| ENSG00000187116 | 1.316902285 | 0.001024676 | 0.014664233 | LILRA5     |
| ENSG00000109971 | 1.316634913 | 3.05E-05    | 0.000871171 | HSPA8      |
| ENSG00000133065 | 1.315455022 | 4.15E-05    | 0.001119523 | SLC41A1    |
| ENSG00000056972 | 1.315328533 | 0.00018871  | 0.00392329  | TRAF3IP2   |
| ENSG00000028137 | 1.314124023 | 3.13E-08    | 2.35E-06    | TNFRSF1B   |
| ENSG00000137494 | 1.311493955 | 5.24E-08    | 3.60E-06    | ANKRD42    |
| ENSG00000177464 | 1.311204527 | 7.06E-05    | 0.001735617 | GPR4       |
| ENSG00000124253 | 1.311158063 | 0.000191741 | 0.003960925 | PCK1       |
| ENSG00000237094 | 1.310678909 | 0.001904466 | 0.023390868 | AL732372.2 |
| ENSG00000092820 | 1.310026292 | 2.44E-05    | 0.000739178 | EZR        |
| ENSG00000229915 | 1.30897978  | 0.002669534 | 0.029916613 | AC016999.1 |
| ENSG00000279133 | 1.304862496 | 0.000177533 | 0.003726597 | AC018628.1 |
| ENSG00000090924 | 1.304649629 | 8.10E-06    | 0.00028812  | PLEKHG2    |
| ENSG00000154252 | 1.298141108 | 0.003213876 | 0.034217163 | GAL3ST2    |
| ENSG00000111057 | 1.298096508 | 5.77E-06    | 0.00021627  | KRT18      |
| ENSG00000254285 | 1.294446414 | 0.000588068 | 0.009453534 | KRT8P3     |
| ENSG00000232713 | 1.293637319 | 0.001566013 | 0.020154649 | AC010733.1 |
| ENSG00000104689 | 1.290889365 | 6.45E-06    | 0.000237188 | TNFRSF10A  |
| ENSG00000152952 | 1.28924048  | 0.002563177 | 0.02900314  | PLOD2      |
| ENSG00000163435 | 1.288417159 | 0.000477752 | 0.008023142 | ELF3       |
| ENSG00000057704 | 1.288340098 | 7.20E-05    | 0.001762256 | TMCC3      |
| ENSG00000143067 | 1.285252967 | 3.06E-06    | 0.000124972 | ZNF697     |
| ENSG00000085265 | 1.279834907 | 0.001977984 | 0.024116906 | FCN1       |
| ENSG00000180525 | 1.278963564 | 1.94E-06    | 8.37E-05    | PRR26      |
| ENSG00000130592 | 1.277267549 | 0.001443481 | 0.018992171 | LSP1       |
| ENSG00000163083 | 1.274495775 | 0.00030669  | 0.005704213 | INHBB      |
| ENSG00000172183 | 1.274274288 | 0.000742616 | 0.011360806 | ISG20      |
| ENSG00000175768 | 1.273948332 | 0.000154628 | 0.003348766 | TOMM5      |
| ENSG00000266171 | 1.273797952 | 0.004721279 | 0.044904072 | AP001020.3 |
| ENSG00000101162 | 1.272000076 | 0.000208708 | 0.004260539 | TUBB1      |
| ENSG00000087085 | 1.271678843 | 0.000230993 | 0.004599563 | ACHE       |
| ENSG00000196182 | 1.27135602  | 4.54E-08    | 3.21E-06    | STK40      |
| ENSG00000198355 | 1.271326421 | 6.55E-08    | 4.29E-06    | PIM3       |
| ENSG00000172059 | 1.271265279 | 4.20E-05    | 0.001130311 | KLF11      |
| ENSG00000124251 | 1.271135709 | 0.003064665 | 0.03307854  | TP53TG5    |
| ENSG00000230844 | 1.269953387 | 9.49E-05    | 0.002221149 | ZNF674-AS1 |
| ENSG00000186594 | 1.268618612 | 2.31E-05    | 0.000708782 | MIR22HG    |
| ENSG00000187134 | 1.267102943 | 0.00022226  | 0.004480783 | AKR1C1     |
| ENSG00000167034 | 1.266614272 | 6.38E-08    | 4.22E-06    | NKX3-1     |
| ENSG00000188483 | 1.266375746 | 0.00379316  | 0.038489378 | IER5L      |
| ENSG00000171368 | 1.265812966 | 1.29E-05    | 0.000427267 | TPPP       |
| ENSG00000184254 | 1.265244519 | 0.000227731 | 0.004567085 | ALDH1A3    |
| ENSG00000189320 | 1.264280681 | 0.000141295 | 0.003117386 | FAM180A    |
| ENSG00000070495 | 1.261375521 | 8.56E-12    | 1.54E-09    | JMJD6      |
| ENSG00000107372 | 1.260844554 | 2.88E-10    | 3.45E-08    | ZFAND5     |
| ENSG00000164142 | 1.258455835 | 0.000648666 | 0.010224959 | FAM160A1   |

|                 |             |             |             |            |
|-----------------|-------------|-------------|-------------|------------|
| ENSG00000159216 | 1.257369429 | 0.000337657 | 0.006126476 | RUNX1      |
| ENSG00000101236 | 1.255515372 | 5.94E-06    | 0.000221237 | RNF24      |
| ENSG00000273472 | 1.255259934 | 0.00044976  | 0.007677287 | AC096733.2 |
| ENSG00000131019 | 1.254294654 | 0.003112883 | 0.033402345 | ULBP3      |
| ENSG00000158470 | 1.251606833 | 2.54E-05    | 0.000758816 | B4GALT5    |
| ENSG00000277443 | 1.25111743  | 5.66E-05    | 0.001458466 | MARCKS     |
| ENSG00000176907 | 1.250739905 | 8.90E-05    | 0.002108042 | C8orf4     |
| ENSG00000145362 | 1.245928158 | 0.000248138 | 0.004837107 | ANK2       |
| ENSG00000106952 | 1.244770467 | 0.000830547 | 0.012413231 | TNFSF8     |
| ENSG00000049759 | 1.244058903 | 3.71E-07    | 1.97E-05    | NEDD4L     |
| ENSG00000188897 | 1.238668557 | 3.65E-05    | 0.001014332 | AC099489.1 |
| ENSG00000235908 | 1.236931614 | 0.005115311 | 0.047621767 | RHOA-IT1   |
| ENSG00000116701 | 1.236922495 | 0.000164474 | 0.003506526 | NCF2       |
| ENSG00000278709 | 1.23536375  | 0.003787311 | 0.03844506  | NKILA      |
| ENSG00000205890 | 1.234249066 | 0.004182243 | 0.041290895 | AC108134.1 |
| ENSG00000279539 | 1.232349144 | 0.005287872 | 0.048721281 | AC006486.2 |
| ENSG00000237719 | 1.231735275 | 0.002803709 | 0.030994902 | Z95152.1   |
| ENSG00000166016 | 1.231301296 | 2.84E-06    | 0.000116696 | ABTB2      |
| ENSG00000184922 | 1.2311042   | 0.001290189 | 0.017507975 | FMNL1      |
| ENSG00000111913 | 1.230070931 | 0.002562423 | 0.02900314  | RIPOR2     |
| ENSG00000116954 | 1.229300032 | 2.12E-07    | 1.19E-05    | RRAGC      |
| ENSG00000152484 | 1.229273235 | 2.70E-07    | 1.48E-05    | USP12      |
| ENSG00000256678 | 1.228688746 | 0.002178484 | 0.025880469 | AC025423.3 |
| ENSG00000232810 | 1.228114508 | 0.003075172 | 0.033107222 | TNF        |
| ENSG00000224888 | 1.226903891 | 0.001439616 | 0.018960552 | AC138028.2 |
| ENSG00000020577 | 1.226035915 | 9.41E-06    | 0.00032822  | SAMD4A     |
| ENSG00000219891 | 1.225505026 | 0.003226292 | 0.034293065 | ZSCAN12P1  |
| ENSG00000272078 | 1.222611292 | 1.10E-05    | 0.000372718 | AL139423.1 |
| ENSG00000279198 | 1.221239238 | 0.000640888 | 0.010126965 | AC008894.3 |
| ENSG00000151967 | 1.220390911 | 0.000332974 | 0.006058442 | SCHIP1     |
| ENSG00000275880 | 1.21692473  | 2.31E-05    | 0.000708782 | AL139385.1 |
| ENSG00000004478 | 1.216085664 | 6.64E-06    | 0.000243445 | FKBP4      |
| ENSG00000122254 | 1.215686128 | 0.001951321 | 0.023825394 | HS3ST2     |
| ENSG00000136040 | 1.213618596 | 0.000772379 | 0.011719383 | PLXNC1     |
| ENSG00000145779 | 1.212627746 | 0.000190006 | 0.003937031 | TNFAIP8    |
| ENSG00000116852 | 1.210976984 | 0.000350567 | 0.006296952 | KIF21B     |
| ENSG00000130066 | 1.209776602 | 2.51E-06    | 0.000104675 | SAT1       |
| ENSG00000167173 | 1.208741352 | 9.11E-06    | 0.000320784 | C15orf39   |
| ENSG00000164164 | 1.20816916  | 2.42E-05    | 0.000733818 | OTUD4      |
| ENSG00000064932 | 1.207211821 | 1.87E-05    | 0.000588599 | SBNO2      |
| ENSG00000122694 | 1.206554866 | 4.98E-05    | 0.001304273 | GLIPR2     |
| ENSG00000105993 | 1.205633084 | 1.14E-08    | 9.77E-07    | DNAJB6     |
| ENSG00000100644 | 1.205585114 | 7.77E-05    | 0.001881663 | HIF1A      |
| ENSG00000278864 | 1.205550886 | 0.001680157 | 0.021244323 | AC055811.4 |
| ENSG00000000938 | 1.203653718 | 0.000349345 | 0.006286017 | FGR        |
| ENSG00000184602 | 1.203185062 | 1.83E-08    | 1.50E-06    | SNN        |
| ENSG00000130222 | 1.202147945 | 0.004677644 | 0.044636318 | GADD45G    |
| ENSG00000173559 | 1.19975767  | 0.000153656 | 0.003338998 | NABP1      |
| ENSG00000107338 | 1.198879174 | 2.45E-05    | 0.000739896 | SHB        |
| ENSG00000151151 | 1.193747435 | 1.04E-07    | 6.41E-06    | IPMK       |
| ENSG00000228436 | 1.192899796 | 0.000536712 | 0.008799112 | AL139260.1 |
| ENSG00000116574 | 1.191900321 | 4.45E-09    | 4.12E-07    | RHO        |
| ENSG00000171988 | 1.189088429 | 4.63E-07    | 2.38E-05    | JMJD1C     |
| ENSG00000280407 | 1.188136569 | 0.000148631 | 0.003251594 | AC132872.4 |
| ENSG00000279765 | 1.184169895 | 0.000969035 | 0.014030461 | AC013394.1 |
| ENSG00000175868 | 1.182698867 | 0.002734843 | 0.030401985 | CALCB      |
| ENSG00000171777 | 1.182559488 | 0.001425832 | 0.018817214 | RASGRP4    |
| ENSG00000268279 | 1.182167329 | 0.002511626 | 0.028632093 | AC090004.1 |
| ENSG00000143507 | 1.181862794 | 0.000177669 | 0.003726597 | DUSP10     |
| ENSG00000243444 | 1.181617374 | 0.003066133 | 0.03307854  | PALM2      |
| ENSG00000115598 | 1.181574362 | 0.000109617 | 0.002512468 | IL1RL2     |
| ENSG00000216490 | 1.178256553 | 0.000279916 | 0.005305118 | IFI30      |
| ENSG00000280434 | 1.176099764 | 0.004354173 | 0.042464738 | AL031595.3 |
| ENSG00000159713 | 1.175429515 | 0.003407544 | 0.035621325 | TPPP3      |
| ENSG00000161681 | 1.173996781 | 0.003391364 | 0.035480778 | SHANK1     |
| ENSG00000227741 | 1.173011062 | 0.001265984 | 0.017278912 | AL121987.2 |
| ENSG00000127507 | 1.17281831  | 0.000639484 | 0.010117102 | ADGRE2     |
| ENSG00000077782 | 1.170903242 | 0.000473506 | 0.007982183 | FGFR1      |
| ENSG00000277782 | 1.165153788 | 0.004156183 | 0.041135528 | AC068870.2 |
| ENSG00000170421 | 1.164551509 | 2.44E-05    | 0.000739115 | KRT8       |

|                 |             |             |             |            |
|-----------------|-------------|-------------|-------------|------------|
| ENSG00000100221 | 1.163120925 | 1.76E-10    | 2.24E-08    | JOSD1      |
| ENSG00000172803 | 1.162819346 | 0.000366275 | 0.006506898 | SNX32      |
| ENSG00000189067 | 1.162713535 | 2.80E-08    | 2.16E-06    | LITAF      |
| ENSG00000115641 | 1.162458263 | 0.004114444 | 0.040829245 | FHL2       |
| ENSG00000150510 | 1.160850249 | 0.000288584 | 0.005417671 | FAM124A    |
| ENSG00000147872 | 1.159611969 | 0.000906694 | 0.013283497 | PLIN2      |
| ENSG00000121966 | 1.159002934 | 0.004883757 | 0.04611134  | CXCR4      |
| ENSG00000214264 | 1.158242058 | 0.005187351 | 0.048085394 | KCTD9P4    |
| ENSG00000026508 | 1.158064304 | 0.000674055 | 0.010548272 | CD44       |
| ENSG00000141441 | 1.153416503 | 0.000601458 | 0.009638189 | GAREM1     |
| ENSG00000081320 | 1.152932713 | 0.000608239 | 0.00971161  | STK17B     |
| ENSG00000168404 | 1.152630232 | 1.31E-05    | 0.000433742 | MLKL       |
| ENSG00000185112 | 1.151201593 | 0.003035731 | 0.032901037 | FAM43A     |
| ENSG00000076604 | 1.149578819 | 1.89E-06    | 8.17E-05    | TRAF4      |
| ENSG00000133134 | 1.148378769 | 0.004529006 | 0.043683864 | BEX2       |
| ENSG00000142227 | 1.147989079 | 0.000972839 | 0.014077682 | EMP3       |
| ENSG00000179094 | 1.147700632 | 0.000273596 | 0.005222556 | PER1       |
| ENSG00000166579 | 1.147546333 | 3.61E-09    | 3.43E-07    | NDEL1      |
| ENSG00000273796 | 1.14626148  | 0.002486039 | 0.028440374 | BX322562.1 |
| ENSG00000250295 | 1.14325382  | 0.001708762 | 0.021543028 | RDH10-AS1  |
| ENSG00000109220 | 1.142527027 | 2.46E-06    | 0.000103167 | CHIC2      |
| ENSG00000213430 | 1.142511705 | 1.62E-05    | 0.000519792 | HSPD1P1    |
| ENSG00000034677 | 1.142384293 | 7.61E-07    | 3.70E-05    | RNF19A     |
| ENSG00000146278 | 1.142249323 | 1.42E-06    | 6.29E-05    | PNRC1      |
| ENSG00000115520 | 1.139738783 | 9.82E-09    | 8.52E-07    | COQ10B     |
| ENSG00000244482 | 1.138804481 | 0.000486005 | 0.008127847 | LILRA6     |
| ENSG00000171522 | 1.138713765 | 0.001435436 | 0.018934327 | PTGER4     |
| ENSG00000233058 | 1.138321834 | 0.000347611 | 0.006267739 | LINC00884  |
| ENSG00000178607 | 1.137815885 | 1.19E-07    | 7.19E-06    | ERN1       |
| ENSG00000225313 | 1.137345212 | 9.15E-05    | 0.002155276 | AL513327.1 |
| ENSG00000147883 | 1.136546    | 0.004115026 | 0.040829245 | CDKN2B     |
| ENSG00000275888 | 1.135823985 | 0.000721895 | 0.011083005 | AC132872.3 |
| ENSG00000205129 | 1.135391271 | 0.004342642 | 0.04242534  | C4orf47    |
| ENSG00000224383 | 1.134044626 | 0.001932776 | 0.023632325 | PRR29      |
| ENSG00000120889 | 1.133322031 | 9.69E-07    | 4.51E-05    | TNFRSF10B  |
| ENSG00000134013 | 1.131113454 | 0.002972259 | 0.032375407 | LOXL2      |
| ENSG00000147650 | 1.129902073 | 1.29E-05    | 0.000427267 | LRP12      |
| ENSG00000159399 | 1.127159665 | 0.000114182 | 0.002594188 | HK2        |
| ENSG00000169896 | 1.125335916 | 0.000662282 | 0.01039538  | ITGAM      |
| ENSG00000171867 | 1.123369362 | 1.79E-07    | 1.02E-05    | PRNP       |
| ENSG00000138772 | 1.119115187 | 0.001731808 | 0.021749026 | ANXA3      |
| ENSG00000106089 | 1.117054538 | 0.001379673 | 0.018414091 | STX1A      |
| ENSG00000106993 | 1.117009404 | 1.25E-06    | 5.67E-05    | CDC37L1    |
| ENSG00000170385 | 1.116323083 | 2.64E-05    | 0.000781904 | SLC30A1    |
| ENSG00000114861 | 1.113967939 | 4.40E-08    | 3.13E-06    | FOXP1      |
| ENSG00000162645 | 1.113384633 | 2.51E-05    | 0.000752615 | GBP2       |
| ENSG00000258102 | 1.111732414 | 3.75E-06    | 0.000149143 | MAP1LC3B2  |
| ENSG00000174791 | 1.111603749 | 0.004578731 | 0.044016212 | RIN1       |
| ENSG00000120949 | 1.110300416 | 0.003346816 | 0.035209751 | TNFRSF8    |
| ENSG00000252759 | 1.10996446  | 0.002605994 | 0.02934684  | Y_RNA      |
| ENSG00000146232 | 1.109400352 | 8.11E-06    | 0.00028812  | NFKBIE     |
| ENSG00000183779 | 1.109110496 | 0.001720327 | 0.021636258 | ZNF703     |
| ENSG00000047365 | 1.109032193 | 0.000239898 | 0.004722613 | ARAP2      |
| ENSG00000119138 | 1.108918049 | 0.00102773  | 0.014691723 | KLF9       |
| ENSG00000178409 | 1.108447674 | 0.000134446 | 0.002984028 | BEND3      |
| ENSG00000026652 | 1.10392876  | 0.000269674 | 0.005167617 | AGPAT4     |
| ENSG00000112658 | 1.102185475 | 5.77E-08    | 3.89E-06    | SRF        |
| ENSG00000181472 | 1.101702993 | 1.20E-09    | 1.28E-07    | ZBTB2      |
| ENSG00000142867 | 1.099372451 | 3.83E-08    | 2.79E-06    | BCL10      |
| ENSG00000197885 | 1.098839017 | 6.39E-06    | 0.000235546 | NKIRAS1    |
| ENSG00000168439 | 1.097899297 | 1.65E-05    | 0.000526857 | STIP1      |
| ENSG00000115271 | 1.097697898 | 7.09E-05    | 0.001741172 | GCA        |
| ENSG00000184014 | 1.097530802 | 1.02E-06    | 4.70E-05    | DENND5A    |
| ENSG00000101367 | 1.095825764 | 1.63E-07    | 9.46E-06    | MAPRE1     |
| ENSG00000198431 | 1.095413713 | 8.06E-05    | 0.00193745  | TXNRD1     |
| ENSG00000131263 | 1.094388253 | 1.38E-07    | 8.19E-06    | RLIM       |
| ENSG00000126561 | 1.092455276 | 3.39E-05    | 0.000954329 | STAT5A     |
| ENSG00000146112 | 1.092065761 | 1.09E-05    | 0.000370445 | PPP1R18    |
| ENSG00000130589 | 1.091444821 | 2.36E-05    | 0.000721418 | HELZ2      |
| ENSG00000146072 | 1.089931762 | 0.00055704  | 0.009055736 | TNFRSF21   |

|                 |             |             |             |            |
|-----------------|-------------|-------------|-------------|------------|
| ENSG00000113763 | 1.089861307 | 0.001254965 | 0.017173693 | UNC5A      |
| ENSG00000231721 | 1.089521587 | 9.43E-07    | 4.42E-05    | LINC-PINT  |
| ENSG00000115137 | 1.088619639 | 6.90E-06    | 0.000251452 | DNAJC27    |
| ENSG00000242265 | 1.088353496 | 0.00353285  | 0.036548373 | PEG10      |
| ENSG00000204758 | 1.087073112 | 0.004587137 | 0.044080689 | AC008429.1 |
| ENSG00000185950 | 1.086386783 | 0.000553958 | 0.00901128  | IRS2       |
| ENSG00000035403 | 1.086102912 | 3.42E-05    | 0.00095902  | VCL        |
| ENSG00000023909 | 1.084360124 | 8.00E-05    | 0.001924811 | GCLM       |
| ENSG00000062716 | 1.083843812 | 9.26E-06    | 0.000324299 | VMP1       |
| ENSG00000173918 | 1.083176137 | 0.000519968 | 0.008587586 | C1QTNF1    |
| ENSG00000254612 | 1.082222819 | 0.000945262 | 0.013747633 | AP001000.1 |
| ENSG00000092871 | 1.081393138 | 0.00035823  | 0.006401261 | RFFL       |
| ENSG00000249700 | 1.081288918 | 0.004093315 | 0.040676049 | SRD5A3-AS1 |
| ENSG00000135842 | 1.076105578 | 0.003258701 | 0.034552621 | FAM129A    |
| ENSG00000180801 | 1.075095254 | 0.000189043 | 0.003927047 | ARSJ       |
| ENSG00000163565 | 1.074981909 | 0.000224473 | 0.004518369 | IFI16      |
| ENSG00000153922 | 1.074622851 | 1.04E-06    | 4.78E-05    | CHD1       |
| ENSG00000134317 | 1.074141807 | 0.000309202 | 0.005726819 | GRHL1      |
| ENSG00000187678 | 1.073731997 | 4.00E-06    | 0.000157567 | SPRY4      |
| ENSG00000172578 | 1.073011244 | 0.000324082 | 0.005939747 | KLHL6      |
| ENSG00000169299 | 1.071527412 | 6.17E-07    | 3.05E-05    | PGM2       |
| ENSG00000226479 | 1.069341909 | 5.26E-06    | 0.000199108 | TMEM185B   |
| ENSG00000153443 | 1.06842606  | 0.000161196 | 0.003453662 | UBALD1     |
| ENSG00000163378 | 1.06810139  | 0.000410542 | 0.007134568 | EOGT       |
| ENSG00000173575 | 1.067965386 | 2.55E-07    | 1.41E-05    | CHD2       |
| ENSG00000255864 | 1.065183732 | 0.001027177 | 0.014691723 | AC069208.1 |
| ENSG00000120709 | 1.064409306 | 3.58E-10    | 4.21E-08    | FAM53C     |
| ENSG00000134294 | 1.06355511  | 0.000168002 | 0.003552557 | SLC38A2    |
| ENSG00000116161 | 1.062308905 | 2.70E-05    | 0.000797341 | CACYBP     |
| ENSG00000120705 | 1.060830904 | 4.80E-10    | 5.53E-08    | ETF1       |
| ENSG00000043462 | 1.05921221  | 0.000725986 | 0.011132646 | LCP2       |
| ENSG00000122547 | 1.058669723 | 2.28E-08    | 1.82E-06    | EEDP1      |
| ENSG00000139146 | 1.056192551 | 2.44E-05    | 0.000739896 | FAM60A     |
| ENSG00000279520 | 1.05529793  | 2.13E-05    | 0.000657394 | AC093525.8 |
| ENSG00000154359 | 1.050723942 | 4.47E-05    | 0.001189589 | LONRF1     |
| ENSG00000105281 | 1.050311018 | 0.001586028 | 0.020341609 | SLC1A5     |
| ENSG00000197147 | 1.049236561 | 0.000260082 | 0.005024633 | LRRC8B     |
| ENSG00000127666 | 1.048084141 | 6.60E-07    | 3.25E-05    | TICAM1     |
| ENSG00000150457 | 1.04727029  | 4.03E-06    | 0.000158538 | LATS2      |
| ENSG00000143751 | 1.046434011 | 2.54E-08    | 1.99E-06    | SDE2       |
| ENSG00000117000 | 1.046172709 | 8.11E-07    | 3.90E-05    | RLF        |
| ENSG00000113368 | 1.046063984 | 0.000356527 | 0.006379618 | LMNB1      |
| ENSG00000188042 | 1.045615613 | 0.000807395 | 0.012156005 | ARL4C      |
| ENSG00000100647 | 1.04530303  | 7.60E-07    | 3.70E-05    | SUSD6      |
| ENSG00000280173 | 1.044407455 | 0.001628253 | 0.020739636 | AC104447.1 |
| ENSG00000141458 | 1.043822391 | 0.000274687 | 0.005232725 | NPC1       |
| ENSG00000141540 | 1.043614715 | 0.000672499 | 0.010530272 | TTYH2      |
| ENSG00000084112 | 1.042348978 | 3.32E-07    | 1.78E-05    | SSH1       |
| ENSG00000147894 | 1.04105323  | 7.52E-06    | 0.000271224 | C9orf72    |
| ENSG00000140450 | 1.040834618 | 4.15E-06    | 0.000162129 | ARRDC4     |
| ENSG00000111266 | 1.040182318 | 1.36E-06    | 6.07E-05    | DUSP16     |
| ENSG00000167657 | 1.039189467 | 2.91E-05    | 0.000841562 | DAPK3      |
| ENSG00000159200 | 1.03736602  | 3.94E-06    | 0.000155424 | RCAN1      |
| ENSG00000174951 | 1.036807097 | 0.004187843 | 0.041314743 | FUT1       |
| ENSG00000253669 | 1.03555013  | 0.00045421  | 0.007737965 | AP003356.1 |
| ENSG00000222043 | 1.034332084 | 0.005109599 | 0.047602752 | AC079305.1 |
| ENSG00000196756 | 1.030365603 | 0.000344774 | 0.006233802 | SNHG17     |
| ENSG00000156875 | 1.027274396 | 0.000164799 | 0.003506527 | MFSD14A    |
| ENSG00000135763 | 1.02668063  | 0.000581424 | 0.009375771 | URB2       |
| ENSG00000162889 | 1.025748443 | 5.80E-07    | 2.88E-05    | MAPKAPK2   |
| ENSG00000072274 | 1.022983627 | 8.39E-07    | 4.02E-05    | TFRC       |
| ENSG00000163877 | 1.021618206 | 3.27E-07    | 1.76E-05    | SNIP1      |
| ENSG00000125148 | 1.020161204 | 0.004355148 | 0.042464738 | MT2A       |
| ENSG00000134775 | 1.019920185 | 0.003070051 | 0.033093286 | FHOD3      |
| ENSG00000120438 | 1.019773258 | 1.55E-07    | 9.10E-06    | TCP1       |
| ENSG00000125430 | 1.018231942 | 9.91E-06    | 0.000341874 | HS3ST3B1   |
| ENSG00000277462 | 1.01807351  | 0.000531403 | 0.008745491 | ZNF670     |
| ENSG00000130940 | 1.016587588 | 1.86E-07    | 1.06E-05    | CASZ1      |
| ENSG00000175155 | 1.015769273 | 0.000163172 | 0.003490247 | YPEL2      |
| ENSG00000112096 | 1.013444852 | 0.003374669 | 0.035383183 | SOD2       |

|                 |             |             |             |             |
|-----------------|-------------|-------------|-------------|-------------|
| ENSG00000134954 | 1.011640677 | 4.99E-05    | 0.0013056   | ETS1        |
| ENSG00000134242 | 1.009161285 | 0.002838389 | 0.031284978 | PTPN22      |
| ENSG00000265206 | 1.008781146 | 0.003625786 | 0.037227792 | AC004687.1  |
| ENSG00000118689 | 1.007428091 | 0.000276658 | 0.005258734 | FOXO3       |
| ENSG00000268205 | 1.007290213 | 7.26E-05    | 0.001772946 | AC005261.2  |
| ENSG00000142549 | 1.006933252 | 0.000322853 | 0.005928341 | IGLON5      |
| ENSG00000116679 | 1.006281819 | 5.65E-06    | 0.000212039 | IVNS1ABP    |
| ENSG00000159840 | 1.006087462 | 2.91E-05    | 0.000842769 | ZYX         |
| ENSG00000146707 | 1.004971824 | 0.001875917 | 0.02312235  | POMZP3      |
| ENSG00000160588 | 1.004844369 | 1.98E-08    | 1.60E-06    | MPZL3       |
| ENSG00000145685 | 1.004700629 | 2.13E-05    | 0.000657394 | LHFPL2      |
| ENSG00000184731 | 1.004451503 | 1.34E-06    | 6.03E-05    | FAM110C     |
| ENSG00000154319 | 1.003410172 | 0.002360034 | 0.027570215 | FAM167A     |
| ENSG00000066697 | 1.003088431 | 0.001331063 | 0.017922037 | MSANTD3     |
| ENSG00000163811 | 1.002134297 | 3.04E-05    | 0.000871171 | WDR43       |
| ENSG00000107249 | 1.000367192 | 2.31E-05    | 0.000708782 | GLIS3       |
| ENSG00000185499 | 0.998257287 | 0.004041512 | 0.040300185 | MUC1        |
| ENSG00000055044 | 0.996880571 | 3.02E-08    | 2.29E-06    | NOP58       |
| ENSG00000279095 | 0.995346742 | 0.000137859 | 0.003057171 | AC243964.3  |
| ENSG00000115523 | 0.993175633 | 0.001237405 | 0.016996146 | GNLY        |
| ENSG00000178127 | 0.992133146 | 0.000460183 | 0.007814081 | NDUFV2      |
| ENSG00000132661 | 0.991468419 | 0.00014231  | 0.003137115 | NXT1        |
| ENSG00000225422 | 0.990075364 | 0.002518277 | 0.028665107 | RBMS1P1     |
| ENSG00000167553 | 0.989746902 | 0.000536846 | 0.008799112 | TUBA1C      |
| ENSG00000162407 | 0.988385475 | 1.60E-05    | 0.00051465  | PLPP3       |
| ENSG00000164543 | 0.988150486 | 0.000279438 | 0.005299919 | STK17A      |
| ENSG00000111012 | 0.98667017  | 0.003700992 | 0.037790611 | CYP27B1     |
| ENSG00000244274 | 0.986485817 | 0.003144125 | 0.033654073 | DBNDD2      |
| ENSG00000118707 | 0.983453897 | 5.28E-07    | 2.66E-05    | TGIF2       |
| ENSG00000115594 | 0.982669287 | 0.000231356 | 0.004599563 | IL1R1       |
| ENSG00000158480 | 0.979413257 | 3.60E-07    | 1.91E-05    | SPATA2      |
| ENSG00000110713 | 0.979314336 | 2.91E-08    | 2.22E-06    | NUP98       |
| ENSG00000225746 | 0.978819743 | 0.003073655 | 0.033104626 | MEG8        |
| ENSG00000050820 | 0.977070327 | 8.06E-05    | 0.00193745  | BCAR1       |
| ENSG00000146457 | 0.973857618 | 1.09E-07    | 6.71E-06    | WTAP        |
| ENSG00000161940 | 0.972885205 | 0.000926409 | 0.013518909 | BCL6B       |
| ENSG00000139926 | 0.972793105 | 0.005046257 | 0.047159759 | FRMD6       |
| ENSG00000176915 | 0.972446216 | 4.24E-05    | 0.001140536 | ANKLE2      |
| ENSG00000283154 | 0.97198347  | 8.31E-05    | 0.001989266 | IQCJ-SCHIP1 |
| ENSG00000276517 | 0.971881778 | 0.001537743 | 0.019849889 | AL133243.3  |
| ENSG00000109743 | 0.971629557 | 0.000109857 | 0.002513542 | BST1        |
| ENSG00000173276 | 0.970990419 | 0.00304976  | 0.033020851 | ZBTB21      |
| ENSG00000175182 | 0.96606618  | 2.68E-05    | 0.00079066  | FAM131A     |
| ENSG00000174574 | 0.966029025 | 3.07E-05    | 0.000876244 | AKIRIN1     |
| ENSG00000107937 | 0.963708518 | 1.24E-05    | 0.000414802 | GTPBP4      |
| ENSG00000180747 | 0.963704084 | 0.001697626 | 0.021428347 | SMG1P3      |
| ENSG00000154127 | 0.963379825 | 0.001499935 | 0.019497656 | UBASH3B     |
| ENSG00000198604 | 0.963211963 | 1.03E-06    | 4.73E-05    | BAZ1A       |
| ENSG00000077238 | 0.963105974 | 8.89E-05    | 0.00210758  | IL4R        |
| ENSG00000185015 | 0.960509073 | 0.000139861 | 0.003090143 | CA13        |
| ENSG00000133121 | 0.960173347 | 0.000156123 | 0.003371972 | STARD13     |
| ENSG00000148143 | 0.959072801 | 0.003275778 | 0.034691154 | ZNF462      |
| ENSG00000042493 | 0.957968919 | 0.005022995 | 0.047007821 | CAPG        |
| ENSG00000261150 | 0.957714783 | 0.002574566 | 0.029084871 | EPPK1       |
| ENSG00000109099 | 0.957671496 | 0.00455433  | 0.043832739 | PMP22       |
| ENSG00000135048 | 0.957466276 | 0.000623982 | 0.009926319 | TMEM2       |
| ENSG00000105639 | 0.956264925 | 0.00536601  | 0.04923143  | JAK3        |
| ENSG00000033327 | 0.95419499  | 3.50E-05    | 0.000979079 | GAB2        |
| ENSG00000119139 | 0.953990266 | 0.000910761 | 0.013328034 | TJP2        |
| ENSG00000160570 | 0.953232507 | 0.000288524 | 0.005417671 | DEDD2       |
| ENSG00000135269 | 0.953165035 | 0.000369624 | 0.006546346 | TES         |
| ENSG00000137094 | 0.950447411 | 1.81E-05    | 0.000571726 | DNAJB5      |
| ENSG00000121316 | 0.950091258 | 0.001488604 | 0.019398951 | PLBD1       |
| ENSG00000115762 | 0.948513364 | 8.70E-07    | 4.13E-05    | PLEKHB2     |
| ENSG00000100292 | 0.946243239 | 0.000507236 | 0.00839869  | HMOX1       |
| ENSG00000170776 | 0.945941318 | 2.47E-06    | 0.000103167 | AKAP13      |
| ENSG00000204160 | 0.943037735 | 2.91E-06    | 0.000119286 | ZDHHC18     |
| ENSG00000130147 | 0.941032911 | 0.00048195  | 0.00807274  | SH3BP4      |
| ENSG00000155367 | 0.940094326 | 0.002497683 | 0.028520562 | PPM1J       |
| ENSG00000144597 | 0.937955024 | 2.81E-06    | 0.00011584  | EAF1        |



|                 |             |             |             |            |
|-----------------|-------------|-------------|-------------|------------|
| ENSG00000150907 | 0.937021217 | 6.99E-06    | 0.000254327 | FOXO1      |
| ENSG00000141543 | 0.935566171 | 3.14E-08    | 2.35E-06    | EIF4A3     |
| ENSG00000266094 | 0.934595094 | 1.36E-05    | 0.000446275 | RASSF5     |
| ENSG00000167703 | 0.933044719 | 0.001405033 | 0.018657022 | SLC43A2    |
| ENSG00000275464 | 0.932335691 | 0.000349358 | 0.006286017 | FP565260.1 |
| ENSG00000182378 | 0.931646672 | 1.79E-05    | 0.000567622 | PLCXD1     |
| ENSG00000138162 | 0.925344622 | 5.64E-05    | 0.001453769 | TACC2      |
| ENSG00000101265 | 0.923552583 | 0.003253199 | 0.034522495 | RASSF2     |
| ENSG00000168906 | 0.923463192 | 0.002222483 | 0.026246944 | MAT2A      |
| ENSG00000215301 | 0.922525174 | 4.58E-07    | 2.36E-05    | DDX3X      |
| ENSG00000102804 | 0.919916846 | 6.01E-06    | 0.000223513 | TSC22D1    |
| ENSG00000073792 | 0.919604135 | 0.004878209 | 0.046109292 | IGF2BP2    |
| ENSG00000185222 | 0.917436433 | 5.09E-05    | 0.001328351 | TCEAL9     |
| ENSG00000113369 | 0.917379402 | 0.002115519 | 0.025329601 | ARRDC3     |
| ENSG00000182718 | 0.914780087 | 0.000858907 | 0.012785546 | ANXA2      |
| ENSG00000272768 | 0.914282183 | 0.004744806 | 0.045084616 | AC004854.2 |
| ENSG00000177337 | 0.914231769 | 4.40E-05    | 0.001175001 | DLGAP1-AS1 |
| ENSG00000125810 | 0.912334618 | 0.004035156 | 0.040252267 | CD93       |
| ENSG00000169641 | 0.911824028 | 0.000109454 | 0.002510969 | LUZP1      |
| ENSG00000153187 | 0.91030495  | 1.93E-09    | 1.94E-07    | HNRNPU     |
| ENSG00000205189 | 0.909719571 | 3.66E-08    | 2.68E-06    | ZBTB10     |
| ENSG00000267107 | 0.908490575 | 0.000220704 | 0.004456339 | PCAT19     |
| ENSG00000164430 | 0.908241855 | 0.001746873 | 0.021885253 | MB21D1     |
| ENSG00000180667 | 0.906527955 | 0.000169964 | 0.003588183 | YOD1       |
| ENSG00000241839 | 0.905194413 | 0.000324161 | 0.005939747 | PLEKHO2    |
| ENSG00000176641 | 0.903263139 | 0.001385995 | 0.018479456 | RNF152     |
| ENSG00000125812 | 0.90265935  | 1.30E-08    | 1.10E-06    | GZF1       |
| ENSG00000104228 | 0.902338795 | 0.002295015 | 0.026931912 | TRIM35     |
| ENSG00000141582 | 0.901813385 | 0.003725242 | 0.037963524 | CBX4       |
| ENSG00000128918 | 0.900072318 | 0.000855772 | 0.012760381 | ALDH1A2    |
| ENSG00000006210 | 0.899479195 | 1.29E-05    | 0.000427267 | CX3CL1     |
| ENSG00000164687 | 0.899424106 | 0.001823451 | 0.022636964 | FABP5      |
| ENSG00000153714 | 0.899421102 | 0.000901867 | 0.013242698 | LURAP1L    |
| ENSG00000072401 | 0.898738824 | 2.08E-05    | 0.000649221 | UBE2D1     |
| ENSG00000134480 | 0.896783485 | 5.13E-06    | 0.000195491 | CCNH       |
| ENSG00000119669 | 0.896770512 | 0.000330951 | 0.006030099 | IRF2BPL    |
| ENSG00000103855 | 0.896366059 | 2.76E-05    | 0.000813114 | CD276      |
| ENSG00000165259 | 0.895536911 | 0.001201911 | 0.016623012 | HDX        |
| ENSG00000197852 | 0.894663089 | 0.000405157 | 0.007069411 | FAM212B    |
| ENSG00000122257 | 0.894591149 | 1.59E-07    | 9.30E-06    | RBBP6      |
| ENSG00000102755 | 0.894540326 | 0.004634691 | 0.044356955 | FLT1       |
| ENSG00000165527 | 0.892462825 | 5.18E-07    | 2.62E-05    | ARF6       |
| ENSG00000101544 | 0.891041587 | 2.78E-08    | 2.16E-06    | ADNP2      |
| ENSG00000095739 | 0.889956895 | 0.000539465 | 0.008830895 | BAMBI      |
| ENSG00000113742 | 0.889379198 | 2.55E-10    | 3.10E-08    | CPEB4      |
| ENSG00000129355 | 0.887295044 | 0.001299611 | 0.017607745 | CDKN2D     |
| ENSG00000127954 | 0.886008314 | 0.004342024 | 0.04242534  | STEAP4     |
| ENSG00000158122 | 0.885250969 | 5.86E-05    | 0.001498681 | AAED1      |
| ENSG00000134686 | 0.884126587 | 0.000645326 | 0.01018469  | PHC2       |
| ENSG00000136603 | 0.883514432 | 1.60E-06    | 7.02E-05    | SKIL       |
| ENSG00000145414 | 0.883033762 | 1.61E-05    | 0.000516309 | NAF1       |
| ENSG00000157111 | 0.881401033 | 4.82E-05    | 0.00127043  | TMEM171    |
| ENSG00000129315 | 0.878509131 | 4.30E-07    | 2.25E-05    | CCNT1      |
| ENSG00000171729 | 0.877929766 | 0.002061988 | 0.024855729 | TMEM51     |
| ENSG00000060558 | 0.877861629 | 0.00219777  | 0.026026173 | GNA15      |
| ENSG00000110880 | 0.877434975 | 5.38E-08    | 3.68E-06    | CORO1C     |
| ENSG00000196338 | 0.873980734 | 0.003093197 | 0.033246103 | NLGN3      |
| ENSG00000268061 | 0.871115153 | 0.002841479 | 0.031292451 | NAPA-AS1   |
| ENSG00000204524 | 0.869081204 | 0.000190129 | 0.003937031 | ZNF805     |
| ENSG00000166949 | 0.868752884 | 0.000587981 | 0.009453534 | SMAD3      |
| ENSG00000132819 | 0.868732792 | 0.000130991 | 0.002917325 | RBM38      |
| ENSG00000204396 | 0.868466875 | 0.001253645 | 0.017173693 | VWA7       |
| ENSG00000152409 | 0.865703177 | 1.33E-05    | 0.00044041  | JMY        |
| ENSG00000011198 | 0.864819834 | 6.78E-05    | 0.001680661 | ABHD5      |
| ENSG00000089159 | 0.864451584 | 0.000165317 | 0.003512957 | PXN        |
| ENSG00000203497 | 0.864372484 | 0.003857674 | 0.038915711 | PDCD4-AS1  |
| ENSG00000196954 | 0.863545832 | 0.001167774 | 0.016233801 | CASP4      |
| ENSG00000198042 | 0.861844143 | 0.000543236 | 0.008869193 | MAK16      |
| ENSG00000102034 | 0.861665346 | 0.001157022 | 0.016139833 | ELF4       |
| ENSG00000182827 | 0.861145247 | 9.76E-05    | 0.002279015 | ACBD3      |

|                 |             |             |             |            |
|-----------------|-------------|-------------|-------------|------------|
| ENSG00000112031 | 0.860880177 | 3.35E-05    | 0.000944077 | MTRF1L     |
| ENSG00000162702 | 0.860208618 | 3.22E-08    | 2.40E-06    | ZNF281     |
| ENSG00000184730 | 0.859113618 | 0.004274653 | 0.041916151 | APOBR      |
| ENSG00000163694 | 0.858152847 | 2.96E-05    | 0.000851387 | RBM47      |
| ENSG00000260971 | 0.856803101 | 0.001459383 | 0.019120472 | AC119674.1 |
| ENSG00000156675 | 0.855572276 | 0.001572292 | 0.020215401 | RAB11FIP1  |
| ENSG00000113916 | 0.855344364 | 2.86E-05    | 0.000834287 | BCL6       |
| ENSG00000170027 | 0.854866917 | 1.07E-06    | 4.92E-05    | YWHAG      |
| ENSG00000169946 | 0.854452393 | 0.001395474 | 0.018564596 | ZFPM2      |
| ENSG00000163162 | 0.85397609  | 0.000107982 | 0.002483779 | RNF149     |
| ENSG00000033867 | 0.852847017 | 0.00275375  | 0.030533674 | SLC4A7     |
| ENSG00000122644 | 0.85231899  | 0.001875178 | 0.02312235  | ARL4A      |
| ENSG00000171612 | 0.851161567 | 0.000527184 | 0.008690161 | SLC25A33   |
| ENSG00000198342 | 0.84977445  | 0.000309892 | 0.005726819 | ZNF442     |
| ENSG00000127311 | 0.849726404 | 0.001503796 | 0.019518508 | HELB       |
| ENSG00000267493 | 0.849276687 | 0.002154498 | 0.025640233 | CIRBP-AS1  |
| ENSG00000183386 | 0.849232205 | 0.002385137 | 0.027741971 | FHL3       |
| ENSG00000165868 | 0.848140182 | 0.0045179   | 0.043625392 | HSPA12A    |
| ENSG00000012660 | 0.847557177 | 0.002127967 | 0.025447717 | ELOVL5     |
| ENSG00000258738 | 0.847218292 | 0.001590021 | 0.020369981 | AL121603.2 |
| ENSG00000165175 | 0.846713693 | 4.97E-05    | 0.001304273 | MID1IP1    |
| ENSG00000159459 | 0.846544063 | 3.39E-05    | 0.000954329 | UBR1       |
| ENSG00000129911 | 0.843888631 | 0.00055023  | 0.008956261 | KLF16      |
| ENSG00000232533 | 0.843627098 | 0.000268298 | 0.005145057 | AC093673.1 |
| ENSG00000145365 | 0.842885736 | 0.002878416 | 0.031605322 | TIFA       |
| ENSG00000139946 | 0.840256809 | 0.002665499 | 0.029887224 | PELI2      |
| ENSG00000141664 | 0.839238807 | 1.71E-07    | 9.77E-06    | ZCCHC2     |
| ENSG00000119986 | 0.839006171 | 0.000215607 | 0.004367016 | AVPI1      |
| ENSG00000164938 | 0.837305282 | 0.001282713 | 0.017424745 | TP53INP1   |
| ENSG00000101596 | 0.835198414 | 0.000287879 | 0.005416466 | SMCHD1     |
| ENSG00000101421 | 0.834624962 | 4.28E-05    | 0.001148378 | CHMP4B     |
| ENSG00000095951 | 0.83422769  | 0.000747885 | 0.0114212   | HIVEP1     |
| ENSG00000198858 | 0.833717448 | 4.36E-05    | 0.001167459 | R3HDM4     |
| ENSG00000111817 | 0.833281415 | 6.89E-05    | 0.001700142 | DSE        |
| ENSG00000158019 | 0.833197957 | 4.37E-05    | 0.001168044 | BABAM2     |
| ENSG00000080371 | 0.83258769  | 1.51E-07    | 8.87E-06    | RAB21      |
| ENSG00000139372 | 0.830800537 | 0.000802545 | 0.012099271 | TDG        |
| ENSG00000106665 | 0.830570438 | 0.001209136 | 0.0166901   | CLIP2      |
| ENSG00000112245 | 0.829424666 | 0.000315673 | 0.005812949 | PTP4A1     |
| ENSG00000030110 | 0.828039288 | 0.000164408 | 0.003506526 | BAK1       |
| ENSG00000184371 | 0.827304449 | 0.000126454 | 0.002830863 | CSF1       |
| ENSG0000027697  | 0.826977508 | 0.000805645 | 0.012138944 | IFNGR1     |
| ENSG00000179604 | 0.826789655 | 0.000145898 | 0.003199895 | CDC42EP4   |
| ENSG00000204577 | 0.825960865 | 0.004342932 | 0.04242534  | LILRB3     |
| ENSG00000170989 | 0.824980979 | 0.000438957 | 0.00752754  | S1PR1      |
| ENSG00000080561 | 0.82467565  | 0.000639277 | 0.010117102 | MID2       |
| ENSG00000065989 | 0.824001928 | 0.002599491 | 0.029299756 | PDE4A      |
| ENSG00000136527 | 0.823858967 | 2.72E-07    | 1.50E-05    | TRA2B      |
| ENSG00000140968 | 0.823522909 | 2.39E-05    | 0.000728346 | IRF8       |
| ENSG00000065802 | 0.820518814 | 5.58E-05    | 0.001443142 | ASB1       |
| ENSG00000188313 | 0.820393615 | 0.002136573 | 0.025487593 | PLSCR1     |
| ENSG00000112578 | 0.819494524 | 0.000903614 | 0.013253343 | BYSL       |
| ENSG00000184009 | 0.817809369 | 0.000362826 | 0.00647893  | ACTG1      |
| ENSG00000163376 | 0.817290996 | 0.00315111  | 0.03370103  | KBTBD8     |
| ENSG00000205710 | 0.815259056 | 0.001018413 | 0.014590697 | C17orf107  |
| ENSG00000240891 | 0.813471271 | 0.000543501 | 0.008869193 | PLCXD2     |
| ENSG00000272009 | 0.81333191  | 0.00383284  | 0.038755601 | AL121944.1 |
| ENSG00000115306 | 0.812655652 | 0.000262591 | 0.005062105 | SPTBN1     |
| ENSG00000115541 | 0.8122345   | 0.000365328 | 0.006506898 | HSPE1      |
| ENSG00000101773 | 0.811812227 | 0.001408914 | 0.018669909 | RBBP8      |
| ENSG00000198742 | 0.810838658 | 2.17E-06    | 9.17E-05    | SMURF1     |
| ENSG00000152503 | 0.810140914 | 0.002201322 | 0.026056345 | TRIM36     |
| ENSG00000063660 | 0.80952529  | 9.81E-05    | 0.002288481 | GPC1       |
| ENSG00000137393 | 0.809190634 | 0.000280897 | 0.005319827 | RNF144B    |
| ENSG00000188636 | 0.808835742 | 0.000232149 | 0.004601483 | RTL6       |
| ENSG00000141551 | 0.806572656 | 5.20E-06    | 0.000197199 | CSNK1D     |
| ENSG00000073008 | 0.806140158 | 0.000238693 | 0.004706029 | PVR        |
| ENSG00000161011 | 0.804753915 | 5.33E-07    | 2.67E-05    | SQSTM1     |
| ENSG00000276023 | 0.804204337 | 4.93E-05    | 0.0012964   | DUSP14     |
| ENSG00000050327 | 0.803381296 | 0.000819993 | 0.012269635 | ARHGEF5    |

|                 |             |             |             |           |
|-----------------|-------------|-------------|-------------|-----------|
| ENSG00000135241 | 0.802968637 | 1.97E-05    | 0.000616257 | PNPLA8    |
| ENSG00000197461 | 0.802408055 | 0.001453547 | 0.019095559 | PDGFA     |
| ENSG00000109814 | 0.802030068 | 0.000886029 | 0.013091632 | UGDH      |
| ENSG00000078269 | 0.800167754 | 0.001796662 | 0.022325764 | SYNJ2     |
| ENSG00000165006 | 0.797495683 | 5.13E-07    | 2.61E-05    | UBAP1     |
| ENSG00000169991 | 0.796762129 | 0.002862917 | 0.031461776 | IFFO2     |
| ENSG00000125753 | 0.796410739 | 0.001343644 | 0.018035273 | VASP      |
| ENSG00000171552 | 0.796122542 | 0.001399509 | 0.018602287 | BCL2L1    |
| ENSG00000131941 | 0.795539781 | 7.18E-05    | 0.001759474 | RHPN2     |
| ENSG00000152684 | 0.79475666  | 5.18E-06    | 0.000196601 | PELO      |
| ENSG00000115604 | 0.791997896 | 0.001442963 | 0.018992171 | IL18R1    |
| ENSG00000147439 | 0.787572046 | 4.15E-06    | 0.000162129 | BIN3      |
| ENSG00000007944 | 0.786691304 | 0.000893364 | 0.013140151 | MYLIP     |
| ENSG00000168175 | 0.784459902 | 6.81E-08    | 4.42E-06    | MAPK1IP1L |
| ENSG00000198369 | 0.783008535 | 0.000818046 | 0.012254633 | SPRED2    |
| ENSG00000157800 | 0.780418266 | 0.000413559 | 0.007182202 | SLC37A3   |
| ENSG00000070961 | 0.779414027 | 4.55E-05    | 0.001208816 | ATP2B1    |
| ENSG00000137462 | 0.778780009 | 0.003866246 | 0.038983195 | TLR2      |
| ENSG00000064666 | 0.778735883 | 0.000878253 | 0.013021226 | CNN2      |
| ENSG00000076641 | 0.777429112 | 0.000305067 | 0.005682176 | PAG1      |
| ENSG00000135605 | 0.773947526 | 0.00294556  | 0.032206282 | TEC       |
| ENSG00000171174 | 0.771383308 | 3.21E-07    | 1.73E-05    | RBKS      |
| ENSG00000198223 | 0.770531677 | 0.005364504 | 0.04923143  | CSF2RA    |
| ENSG00000153721 | 0.76864521  | 4.32E-05    | 0.001158385 | CNKSR3    |
| ENSG00000182831 | 0.768475094 | 3.07E-08    | 2.31E-06    | C16orf72  |
| ENSG00000147144 | 0.766670001 | 0.004349112 | 0.042453745 | CCDC120   |
| ENSG00000160908 | 0.766504931 | 6.45E-06    | 0.000237188 | ZNF394    |
| ENSG00000090020 | 0.765945886 | 0.004335603 | 0.042417626 | SLC9A1    |
| ENSG00000142634 | 0.765279404 | 0.001691599 | 0.021368178 | EFHD2     |
| ENSG00000049130 | 0.76521079  | 0.00446166  | 0.043250965 | KITLG     |
| ENSG00000162775 | 0.76455146  | 1.39E-09    | 1.45E-07    | RBM15     |
| ENSG00000249673 | 0.763887049 | 0.000192506 | 0.003973559 | NOP14-AS1 |
| ENSG00000154124 | 0.763340703 | 6.63E-05    | 0.001651695 | OTULIN    |
| ENSG00000154380 | 0.760803247 | 0.000577889 | 0.009330372 | ENAH      |
| ENSG00000163349 | 0.760494776 | 2.72E-05    | 0.000801169 | HIPK1     |
| ENSG00000124201 | 0.755872718 | 6.45E-05    | 0.001617268 | ZNFX1     |
| ENSG00000133703 | 0.755203191 | 9.15E-05    | 0.002155276 | KRAS      |
| ENSG00000134470 | 0.755178277 | 0.004228387 | 0.041603991 | IL15RA    |
| ENSG00000168884 | 0.754204317 | 0.000100134 | 0.002332204 | TNIP2     |
| ENSG00000272886 | 0.752693273 | 3.30E-05    | 0.000933366 | DCP1A     |
| ENSG00000164924 | 0.750949712 | 4.14E-05    | 0.001119523 | YWHAZ     |
| ENSG00000196935 | 0.75092714  | 0.003375217 | 0.035383183 | SRGAP1    |
| ENSG00000132603 | 0.750787095 | 0.0006631   | 0.010401929 | NIP7      |
| ENSG00000153250 | 0.750290446 | 0.000345889 | 0.006249616 | RBMS1     |
| ENSG00000037897 | 0.749968976 | 0.002016155 | 0.024444471 | METTL1    |
| ENSG00000166025 | 0.748832509 | 0.003302548 | 0.03488921  | AMOTL1    |
| ENSG00000179119 | 0.748653471 | 7.28E-06    | 0.000263669 | SPTY2D1   |
| ENSG00000008083 | 0.748631951 | 4.90E-05    | 0.001288297 | JARID2    |
| ENSG00000121039 | 0.748423377 | 0.000816518 | 0.012238815 | RDH10     |
| ENSG00000124171 | 0.748225269 | 0.000110588 | 0.002528034 | PARD6B    |
| ENSG00000171763 | 0.744463453 | 0.000588804 | 0.009456077 | SPATA5L1  |
| ENSG00000124789 | 0.744420879 | 1.40E-05    | 0.000459843 | NUP153    |
| ENSG00000141568 | 0.744107476 | 2.15E-06    | 9.09E-05    | FOXK2     |
| ENSG00000131669 | 0.743239072 | 0.000213396 | 0.004335767 | NINJ1     |
| ENSG00000175895 | 0.742364592 | 5.34E-05    | 0.001389304 | PLEKHF2   |
| ENSG00000141574 | 0.742045329 | 0.003530794 | 0.036545592 | SECTM1    |
| ENSG00000023287 | 0.740190394 | 3.04E-05    | 0.000870869 | RB1CC1    |
| ENSG00000205534 | 0.739833589 | 0.000748498 | 0.011423797 | SMG1P2    |
| ENSG00000173545 | 0.738412379 | 1.61E-05    | 0.000517389 | ZNF622    |
| ENSG00000136160 | 0.738080762 | 0.002005241 | 0.024334883 | EDNRB     |
| ENSG00000115738 | 0.738022109 | 0.002619904 | 0.029460163 | ID2       |
| ENSG00000102572 | 0.73755523  | 0.000231343 | 0.004599563 | STK24     |
| ENSG00000025772 | 0.737252513 | 0.000671723 | 0.010524475 | TOMM34    |
| ENSG00000255112 | 0.736415667 | 1.74E-07    | 9.97E-06    | CHMP1B    |
| ENSG00000158186 | 0.736312502 | 0.00060435  | 0.009661408 | MRAS      |
| ENSG00000142528 | 0.735835035 | 9.19E-06    | 0.000322273 | ZNF473    |
| ENSG00000147454 | 0.735422842 | 0.001302033 | 0.017616053 | SLC25A37  |
| ENSG00000173598 | 0.734134588 | 2.11E-05    | 0.00065275  | NUDT4     |
| ENSG00000119326 | 0.734121737 | 0.000122914 | 0.002761142 | CTNNA1    |
| ENSG00000198824 | 0.733580522 | 0.000627343 | 0.009967563 | CHAMP1    |

|                 |             |             |             |            |
|-----------------|-------------|-------------|-------------|------------|
| ENSG00000185989 | 0.733487899 | 0.003446344 | 0.035965574 | RASA3      |
| ENSG00000147324 | 0.732963572 | 0.00405232  | 0.040345929 | MFHAS1     |
| ENSG00000115183 | 0.731316129 | 0.001965192 | 0.023983477 | TANC1      |
| ENSG00000173039 | 0.729642255 | 1.40E-07    | 8.27E-06    | RELA       |
| ENSG00000135334 | 0.728996851 | 6.61E-08    | 4.31E-06    | AKIRIN2    |
| ENSG00000163938 | 0.728709248 | 0.002955312 | 0.032285694 | GNL3       |
| ENSG00000164916 | 0.72753979  | 0.001590595 | 0.020369981 | FOXK1      |
| ENSG00000090061 | 0.727512126 | 0.000397113 | 0.006947746 | CCNK       |
| ENSG00000204152 | 0.725767172 | 2.92E-05    | 0.000842806 | TIMM23B    |
| ENSG00000095397 | 0.725749392 | 0.005226663 | 0.048317303 | WHRN       |
| ENSG00000167491 | 0.723940857 | 0.000357593 | 0.006394288 | GATAD2A    |
| ENSG00000204592 | 0.723776636 | 6.39E-05    | 0.001606311 | HLA-E      |
| ENSG00000118939 | 0.723636455 | 0.005218196 | 0.048301289 | UCHL3      |
| ENSG00000125733 | 0.723344325 | 0.003054852 | 0.033023414 | TRIP10     |
| ENSG00000119280 | 0.722896663 | 0.002741685 | 0.030451949 | C1orf198   |
| ENSG00000241878 | 0.722076297 | 0.000549353 | 0.008947991 | PISD       |
| ENSG00000170606 | 0.721283354 | 3.98E-05    | 0.001084112 | HSPA4      |
| ENSG00000251022 | 0.720310513 | 0.002499096 | 0.028520562 | THAP9-AS1  |
| ENSG00000163754 | 0.72014823  | 0.00071041  | 0.010953678 | GYG1       |
| ENSG00000116273 | 0.719436123 | 5.38E-07    | 2.69E-05    | PHF13      |
| ENSG00000139793 | 0.719371464 | 0.001308483 | 0.017673036 | MBNL2      |
| ENSG00000171940 | 0.718870565 | 0.000385967 | 0.006784755 | ZNF217     |
| ENSG00000114648 | 0.718733427 | 4.30E-06    | 0.000167643 | KLHL18     |
| ENSG00000137502 | 0.717703224 | 0.000154125 | 0.003343575 | RAB30      |
| ENSG00000104164 | 0.71742035  | 0.000311724 | 0.005752483 | BLOC1S6    |
| ENSG00000146374 | 0.71720777  | 0.000886546 | 0.013091816 | RSPO3      |
| ENSG00000139154 | 0.716801673 | 4.14E-06    | 0.000162129 | AEBP2      |
| ENSG00000260805 | 0.716780814 | 0.004183866 | 0.041291211 | AC092803.2 |
| ENSG00000101361 | 0.716419518 | 0.001715603 | 0.021597787 | NOP56      |
| ENSG00000123395 | 0.71595639  | 0.000246389 | 0.004819583 | ATG101     |
| ENSG00000059758 | 0.715724096 | 0.000138369 | 0.003065854 | CDK17      |
| ENSG00000130779 | 0.715645018 | 0.001527272 | 0.019754031 | CLIP1      |
| ENSG00000109332 | 0.715610602 | 3.43E-07    | 1.83E-05    | UBE2D3     |
| ENSG00000168575 | 0.715581241 | 0.003996883 | 0.039993491 | SLC20A2    |
| ENSG00000127080 | 0.715291591 | 0.004606697 | 0.044150368 | IPPK       |
| ENSG00000170185 | 0.713955164 | 0.000279376 | 0.005299919 | USP38      |
| ENSG00000110104 | 0.713450298 | 0.002572583 | 0.029084871 | CCDC86     |
| ENSG00000244513 | 0.712412891 | 0.003990765 | 0.039993491 | AC109587.1 |
| ENSG00000151748 | 0.712399538 | 3.74E-06    | 0.000149088 | SAV1       |
| ENSG00000165355 | 0.711659328 | 7.94E-05    | 0.001912481 | FBXO33     |
| ENSG00000104450 | 0.711262445 | 0.00102391  | 0.014661348 | SPAG1      |
| ENSG00000121274 | 0.710322665 | 0.000665513 | 0.010433472 | PAPD5      |
| ENSG00000124831 | 0.709794907 | 1.86E-05    | 0.000584727 | LRRFIP1    |
| ENSG00000174485 | 0.708050364 | 0.001769568 | 0.022105548 | DENND4A    |
| ENSG00000168994 | 0.707325473 | 0.001274576 | 0.017341458 | PXDC1      |
| ENSG00000008294 | 0.70717773  | 7.71E-05    | 0.001869013 | SPAG9      |
| ENSG00000166333 | 0.702803139 | 0.003351991 | 0.035239366 | ILK        |
| ENSG00000179833 | 0.699796451 | 0.002451283 | 0.028179437 | SERTAD2    |
| ENSG00000160785 | 0.698354774 | 0.000309294 | 0.005726819 | SLC25A44   |
| ENSG00000188295 | 0.698161582 | 0.005163535 | 0.047979659 | ZNF669     |
| ENSG00000112242 | 0.696895059 | 0.000916719 | 0.013400114 | E2F3       |
| ENSG00000225190 | 0.696488435 | 7.61E-06    | 0.000273396 | PLEKHM1    |
| ENSG00000150977 | 0.696317456 | 5.86E-05    | 0.001498681 | RILPL2     |
| ENSG00000251562 | 0.695923321 | 0.000689712 | 0.010735008 | MALAT1     |
| ENSG00000105849 | 0.694586864 | 0.000235192 | 0.004654694 | TWISTNB    |
| ENSG00000118496 | 0.694117237 | 1.83E-05    | 0.000575873 | FBXO30     |
| ENSG00000134697 | 0.693697932 | 0.000276567 | 0.005258734 | GNL2       |
| ENSG00000104825 | 0.692556394 | 0.000486514 | 0.008128198 | NFKBIB     |
| ENSG00000162636 | 0.691835746 | 0.001587385 | 0.020348954 | FAM102B    |
| ENSG00000107554 | 0.691396041 | 0.00050708  | 0.00839869  | DNMBP      |
| ENSG00000138670 | 0.690633879 | 0.001148179 | 0.016033717 | RASGEF1B   |
| ENSG00000136950 | 0.690323156 | 0.000779471 | 0.011820081 | ARPC5L     |
| ENSG00000168394 | 0.68956481  | 0.002994374 | 0.032550559 | TAP1       |
| ENSG00000137575 | 0.688086023 | 3.59E-06    | 0.000144336 | SDCBP      |
| ENSG00000153179 | 0.687103936 | 0.000302739 | 0.005642869 | RASSF3     |
| ENSG00000072201 | 0.686730195 | 0.002399286 | 0.027862009 | LNX1       |
| ENSG00000166233 | 0.686673703 | 9.58E-06    | 0.000332509 | ARIH1      |
| ENSG00000237296 | 0.686520515 | 0.000236453 | 0.004676073 | SMG1P1     |
| ENSG00000198900 | 0.685306612 | 7.67E-05    | 0.001864013 | TOP1       |
| ENSG00000075624 | 0.684959123 | 5.02E-06    | 0.000191913 | ACTB       |

|                 |             |             |             |            |
|-----------------|-------------|-------------|-------------|------------|
| ENSG00000135766 | 0.684892509 | 0.00045592  | 0.007751836 | EGLN1      |
| ENSG00000106546 | 0.684174707 | 5.57E-05    | 0.001441497 | AHR        |
| ENSG00000096717 | 0.683420517 | 4.57E-07    | 2.36E-05    | SIRT1      |
| ENSG00000120690 | 0.683383127 | 0.000152026 | 0.003311896 | ELF1       |
| ENSG00000086062 | 0.682051543 | 0.001674409 | 0.021210864 | B4GALT1    |
| ENSG00000071054 | 0.681014481 | 0.000809352 | 0.012166533 | MAP4K4     |
| ENSG00000111641 | 0.680660235 | 0.001612092 | 0.020553971 | NOP2       |
| ENSG00000221914 | 0.679955909 | 2.58E-06    | 0.000106892 | PPP2R2A    |
| ENSG00000140598 | 0.679216228 | 0.002444854 | 0.028130461 | EFL1       |
| ENSG00000101216 | 0.677868843 | 0.000112607 | 0.002565136 | GMEB2      |
| ENSG00000185650 | 0.677334573 | 0.000588955 | 0.009456077 | ZFP36L1    |
| ENSG00000068028 | 0.674663182 | 0.003072601 | 0.033104626 | RASSF1     |
| ENSG00000116016 | 0.673023524 | 0.000251401 | 0.004882372 | EPAS1      |
| ENSG00000080845 | 0.671644171 | 1.49E-05    | 0.000483891 | DLGAP4     |
| ENSG00000151694 | 0.670184283 | 0.004835206 | 0.045752825 | ADAM17     |
| ENSG00000236753 | 0.667824594 | 0.002471229 | 0.028299169 | MKLN1-AS   |
| ENSG00000083799 | 0.667260145 | 0.001094211 | 0.015480036 | CYLD       |
| ENSG00000171466 | 0.667129707 | 0.002528799 | 0.028744545 | ZNF562     |
| ENSG00000187079 | 0.664863852 | 0.001945179 | 0.02377278  | TEAD1      |
| ENSG00000135913 | 0.664698898 | 0.004600015 | 0.044150368 | USP37      |
| ENSG00000115946 | 0.664556706 | 0.002959982 | 0.032323103 | PNO1       |
| ENSG00000166833 | 0.662776527 | 0.001553477 | 0.020013168 | NAV2       |
| ENSG00000142961 | 0.662682583 | 0.000145307 | 0.003189632 | MOB3C      |
| ENSG00000233230 | 0.662159355 | 0.001350915 | 0.018114123 | AC079807.2 |
| ENSG00000174749 | 0.661901139 | 0.000426124 | 0.007351201 | C4orf32    |
| ENSG00000110046 | 0.6608442   | 0.002906544 | 0.031873706 | ATG2A      |
| ENSG00000170677 | 0.660724258 | 0.000106214 | 0.002445283 | SOCS6      |
| ENSG00000119729 | 0.660145956 | 0.002748637 | 0.030503049 | RHOQ       |
| ENSG00000116044 | 0.659879658 | 2.40E-06    | 0.00010087  | NFE2L2     |
| ENSG00000110852 | 0.659430018 | 0.001221028 | 0.01680679  | CLEC2B     |
| ENSG00000115816 | 0.65922673  | 0.003347817 | 0.035209751 | CEBPZ      |
| ENSG00000161638 | 0.658634062 | 0.002065553 | 0.024867801 | ITGA5      |
| ENSG00000254087 | 0.658509438 | 0.001258099 | 0.017189382 | LYN        |
| ENSG00000170315 | 0.658291319 | 0.003702923 | 0.037795451 | UBB        |
| ENSG00000114019 | 0.657470534 | 0.002275424 | 0.026726193 | AMOTL2     |
| ENSG00000125505 | 0.656285579 | 0.000656452 | 0.010322607 | MBOAT7     |
| ENSG00000065613 | 0.654478895 | 2.86E-05    | 0.000834287 | SLK        |
| ENSG00000170852 | 0.65309168  | 2.10E-05    | 0.000652057 | KBTD2      |
| ENSG00000062194 | 0.652084285 | 1.84E-06    | 7.99E-05    | GPBP1      |
| ENSG00000188785 | 0.650695917 | 3.72E-05    | 0.001028726 | ZNF548     |
| ENSG00000132467 | 0.649728218 | 0.001423077 | 0.01880955  | UTP3       |
| ENSG00000076356 | 0.648518454 | 0.000575542 | 0.009321476 | PLXNA2     |
| ENSG00000127314 | 0.64817067  | 0.000105534 | 0.002436113 | RAP1B      |
| ENSG00000186432 | 0.645543938 | 5.89E-05    | 0.001501246 | KPNA4      |
| ENSG00000196850 | 0.645125858 | 0.001211527 | 0.016702587 | PPTC7      |
| ENSG00000130826 | 0.642402109 | 0.001528584 | 0.01976116  | DKC1       |
| ENSG00000100591 | 0.642277309 | 0.000448442 | 0.007659819 | AHSA1      |
| ENSG00000130766 | 0.641502744 | 0.003320133 | 0.035056605 | SESN2      |
| ENSG00000141867 | 0.640985433 | 9.51E-07    | 4.44E-05    | BRD4       |
| ENSG00000104142 | 0.640914402 | 0.003123979 | 0.033482187 | VPS18      |
| ENSG00000135503 | 0.640123512 | 0.001968365 | 0.024010905 | ACVR1B     |
| ENSG00000225648 | 0.639827038 | 0.001549138 | 0.019967186 | SBDSP1     |
| ENSG00000154582 | 0.639468438 | 0.002662801 | 0.029869877 | ELOC       |
| ENSG00000130830 | 0.639406547 | 0.000166143 | 0.003524728 | MPP1       |
| ENSG00000179134 | 0.638663221 | 6.78E-06    | 0.00024737  | SAMD4B     |
| ENSG00000213719 | 0.638131942 | 0.00151357  | 0.019596355 | CLIC1      |
| ENSG00000096063 | 0.637949024 | 9.30E-05    | 0.002180862 | SRPK1      |
| ENSG00000088727 | 0.637449527 | 0.002846125 | 0.031330318 | KIF9       |
| ENSG00000162734 | 0.637441641 | 0.002457914 | 0.028205678 | PEA15      |
| ENSG00000065491 | 0.637397026 | 2.90E-05    | 0.000841562 | TBC1D22B   |
| ENSG00000112406 | 0.636151758 | 6.26E-05    | 0.001583497 | HECA       |
| ENSG00000118263 | 0.635401199 | 0.00069571  | 0.010802154 | KLF7       |
| ENSG00000146966 | 0.634593996 | 0.003563342 | 0.03671742  | DENND2A    |
| ENSG00000112029 | 0.634317634 | 0.00203073  | 0.024597737 | FBXO5      |
| ENSG00000159128 | 0.633797453 | 0.001413688 | 0.018714055 | IFNGR2     |
| ENSG00000264522 | 0.633645821 | 9.16E-05    | 0.00215571  | OTUD7B     |
| ENSG00000126391 | 0.632352851 | 0.004342113 | 0.04242534  | FRMD8      |
| ENSG00000105447 | 0.632319134 | 0.00352143  | 0.036517595 | GRWD1      |
| ENSG00000160584 | 0.631762172 | 1.73E-05    | 0.000552721 | SIK3       |
| ENSG00000182253 | 0.63150027  | 0.004031429 | 0.040245336 | SYNM       |

|                 |             |             |             |          |
|-----------------|-------------|-------------|-------------|----------|
| ENSG00000177105 | 0.631444702 | 0.00317613  | 0.03392666  | RHOG     |
| ENSG00000175606 | 0.631098122 | 0.001603714 | 0.020504675 | TMEM70   |
| ENSG00000101493 | 0.630989732 | 0.000120958 | 0.002719563 | ZNF516   |
| ENSG00000120278 | 0.63096875  | 0.000286048 | 0.005386346 | PLEKHG1  |
| ENSG00000144566 | 0.630952792 | 0.000394245 | 0.006902214 | RAB5A    |
| ENSG00000100664 | 0.630949344 | 0.000657444 | 0.010331943 | EIF5     |
| ENSG00000173744 | 0.63036595  | 0.000492845 | 0.008202281 | AGFG1    |
| ENSG00000172071 | 0.628554334 | 0.004880847 | 0.04611134  | EIF2AK3  |
| ENSG00000164933 | 0.628416241 | 0.000229617 | 0.004586321 | SLC25A32 |
| ENSG00000097007 | 0.628084174 | 0.003381645 | 0.035393364 | ABL1     |
| ENSG00000118200 | 0.627276083 | 0.001032935 | 0.014749884 | CAMSAP2  |
| ENSG00000163961 | 0.626929296 | 0.000685756 | 0.010686259 | RNF168   |
| ENSG00000162419 | 0.626354542 | 6.60E-05    | 0.00164909  | GMEB1    |
| ENSG00000141076 | 0.62250059  | 0.002098582 | 0.025173279 | UTP4     |
| ENSG00000092330 | 0.621104391 | 0.000111342 | 0.00254302  | TINF2    |
| ENSG00000113575 | 0.619765223 | 2.41E-06    | 0.00010131  | PPP2CA   |
| ENSG00000204590 | 0.618668598 | 0.000299824 | 0.005595881 | GNL1     |
| ENSG00000145819 | 0.618558995 | 0.004044845 | 0.040302437 | ARHGAP26 |
| ENSG00000100345 | 0.618499524 | 0.000164879 | 0.003506527 | MYH9     |
| ENSG00000136451 | 0.617614461 | 4.83E-06    | 0.000185499 | VEZF1    |
| ENSG00000117523 | 0.616927841 | 0.001036118 | 0.014770947 | PRRC2C   |
| ENSG00000197063 | 0.616587228 | 0.000439675 | 0.00753488  | MAFG     |
| ENSG00000072364 | 0.615995934 | 1.02E-05    | 0.000349592 | AFF4     |
| ENSG00000205808 | 0.615710543 | 0.001115667 | 0.015680988 | PLPP6    |
| ENSG00000272391 | 0.615658474 | 2.52E-05    | 0.000756921 | POM121C  |
| ENSG00000168495 | 0.614917281 | 0.001494207 | 0.019442964 | POLR3D   |
| ENSG00000147526 | 0.61474537  | 0.003148175 | 0.033683522 | TACC1    |
| ENSG00000197321 | 0.61410634  | 0.003996856 | 0.039993491 | SVIL     |
| ENSG00000087157 | 0.614051566 | 0.002450297 | 0.028179437 | PGS1     |
| ENSG00000107362 | 0.613519841 | 0.001034227 | 0.014752095 | ABHD17B  |
| ENSG00000065809 | 0.613447898 | 5.79E-05    | 0.001484262 | FAM107B  |
| ENSG00000006712 | 0.611384246 | 0.002046121 | 0.024715391 | PAF1     |
| ENSG00000169756 | 0.610740807 | 8.55E-05    | 0.002039484 | LIMS1    |
| ENSG00000173812 | 0.609951302 | 3.16E-05    | 0.000896412 | EIF1     |
| ENSG00000070444 | 0.609667925 | 0.000365857 | 0.006506898 | MNT      |
| ENSG00000144824 | 0.609545265 | 0.005291052 | 0.048733271 | PHLDB2   |
| ENSG00000106608 | 0.609136904 | 0.004499522 | 0.043515498 | URGCP    |
| ENSG00000155366 | 0.609056853 | 0.004250708 | 0.04172867  | RHOC     |
| ENSG00000069020 | 0.606844967 | 0.004241116 | 0.04165804  | MAST4    |
| ENSG00000145901 | 0.606557797 | 0.002574835 | 0.029084871 | TNIP1    |
| ENSG00000148737 | 0.606161824 | 0.004701679 | 0.044816225 | TCF7L2   |
| ENSG00000117143 | 0.605372991 | 0.00238201  | 0.027739506 | UAP1     |
| ENSG00000196470 | 0.605292692 | 0.000232589 | 0.004606689 | SLAH1    |
| ENSG00000107438 | 0.605259029 | 0.000229095 | 0.004579424 | PDLIM1   |
| ENSG00000092978 | 0.605150677 | 0.000163324 | 0.00349061  | GPATCH2  |
| ENSG00000102226 | 0.604573904 | 0.000844426 | 0.012598888 | USP11    |
| ENSG00000104765 | 0.603522392 | 0.001032267 | 0.014748464 | BNIP3L   |
| ENSG00000101558 | 0.603469615 | 4.31E-07    | 2.25E-05    | VAPA     |
| ENSG00000005483 | 0.602739197 | 0.00248327  | 0.028421222 | KMT2E    |
| ENSG00000196313 | 0.602590935 | 0.000182132 | 0.003798708 | POM121   |
| ENSG00000151327 | 0.599983746 | 6.23E-05    | 0.001579545 | FAM177A1 |
| ENSG00000067182 | 0.59923657  | 0.000200715 | 0.004126585 | TNFRSF1A |
| ENSG00000128245 | 0.59880592  | 3.46E-05    | 0.000969309 | YWHAH    |
| ENSG00000116604 | 0.598383978 | 9.23E-05    | 0.002164372 | MEF2D    |
| ENSG00000089195 | 0.59635754  | 0.002358681 | 0.027566817 | TRMT6    |
| ENSG00000169635 | 0.593520929 | 3.01E-05    | 0.000864726 | HIC2     |
| ENSG00000153317 | 0.592765739 | 0.002533636 | 0.028756655 | ASAP1    |
| ENSG00000168769 | 0.592391563 | 0.002471515 | 0.028299169 | TET2     |
| ENSG00000136802 | 0.591362163 | 0.000228828 | 0.004577625 | LRRC8A   |
| ENSG00000185291 | 0.591103248 | 0.00449981  | 0.043515498 | IL3RA    |
| ENSG00000087263 | 0.589539028 | 0.000999726 | 0.014402491 | OGFOD1   |
| ENSG00000174840 | 0.588661953 | 0.001271378 | 0.017316096 | PDE12    |
| ENSG00000083168 | 0.588609395 | 0.000868391 | 0.012911909 | KAT6A    |
| ENSG00000197622 | 0.588165519 | 0.000434617 | 0.007467928 | CDC42SE1 |
| ENSG00000083896 | 0.586162449 | 5.06E-08    | 3.52E-06    | YTHDC1   |
| ENSG00000148175 | 0.586048925 | 0.000785109 | 0.011884741 | STOM     |
| ENSG00000141522 | 0.585996672 | 0.002405516 | 0.027862009 | ARHGDI   |
| ENSG00000172939 | 0.585130608 | 0.000118136 | 0.002669998 | OXSRI    |
| ENSG00000164134 | 0.585005575 | 0.003980308 | 0.039920008 | NAA15    |
| ENSG00000166226 | 0.584288845 | 8.12E-05    | 0.001947373 | CCT2     |

|                 |             |             |             |           |
|-----------------|-------------|-------------|-------------|-----------|
| ENSG00000123094 | 0.581494882 | 0.003912202 | 0.039328166 | RASSF8    |
| ENSG00000196449 | 0.580568158 | 0.004127154 | 0.040933919 | YRDC      |
| ENSG00000204574 | 0.579630845 | 1.60E-06    | 7.02E-05    | ABCF1     |
| ENSG00000196839 | 0.577442035 | 0.002398681 | 0.027862009 | ADA       |
| ENSG00000121579 | 0.575463729 | 0.000733126 | 0.011228866 | NAA50     |
| ENSG00000217128 | 0.575091555 | 0.000589356 | 0.009456674 | FNIP1     |
| ENSG00000105355 | 0.574585235 | 0.005077201 | 0.047368952 | PLIN3     |
| ENSG00000132669 | 0.57427094  | 0.002922642 | 0.031982654 | RIN2      |
| ENSG00000211455 | 0.574047981 | 0.000365101 | 0.006506898 | STK38L    |
| ENSG00000148572 | 0.573987581 | 0.002695098 | 0.030076132 | NRBF2     |
| ENSG00000244462 | 0.573423961 | 0.001068539 | 0.015174778 | RBM12     |
| ENSG00000171456 | 0.572072724 | 0.001192468 | 0.016527656 | ASXL1     |
| ENSG00000157764 | 0.571279684 | 6.04E-05    | 0.001535646 | BRAF      |
| ENSG00000144580 | 0.569928939 | 0.000583567 | 0.009398651 | CNOT9     |
| ENSG00000139112 | 0.569449594 | 0.000181722 | 0.003793199 | GABARAPL1 |
| ENSG00000136891 | 0.569208299 | 0.001269489 | 0.017299455 | TEX10     |
| ENSG00000039523 | 0.569199525 | 0.000940537 | 0.013694267 | RIPOR1    |
| ENSG00000205339 | 0.568847381 | 0.002679948 | 0.029967533 | IPO7      |
| ENSG00000134758 | 0.568289373 | 1.16E-06    | 5.33E-05    | RNF138    |
| ENSG00000093167 | 0.567635253 | 0.00023152  | 0.004599563 | LRRFIP2   |
| ENSG00000069956 | 0.567311594 | 0.002080534 | 0.024996733 | MAPK6     |
| ENSG00000136807 | 0.566393542 | 0.001141397 | 0.01595619  | CDK9      |
| ENSG00000083937 | 0.565875424 | 0.002835459 | 0.031265968 | CHMP2B    |
| ENSG00000089737 | 0.565074713 | 4.09E-05    | 0.001108798 | DDX24     |
| ENSG00000140750 | 0.564834613 | 0.00147154  | 0.019224867 | ARHGAP17  |
| ENSG00000132823 | 0.564400901 | 5.87E-06    | 0.000219206 | OSER1     |
| ENSG00000273559 | 0.56415942  | 0.000684365 | 0.010670996 | CWC25     |
| ENSG00000135049 | 0.563141173 | 0.002128326 | 0.025447717 | AGTPBP1   |
| ENSG00000163347 | 0.561595043 | 0.001817406 | 0.022572718 | CLDN1     |
| ENSG00000178209 | 0.560069149 | 0.004068429 | 0.040490774 | PLEC      |
| ENSG00000130202 | 0.55977682  | 0.004883578 | 0.04611134  | NECTIN2   |
| ENSG00000145860 | 0.559313898 | 0.003892096 | 0.039171576 | RNF145    |
| ENSG00000137055 | 0.558441229 | 0.000365983 | 0.006506898 | PLAA      |
| ENSG00000188786 | 0.557265727 | 0.003197976 | 0.034103854 | MTF1      |
| ENSG00000107643 | 0.555322806 | 0.002871818 | 0.031546227 | MAPK8     |
| ENSG00000234518 | 0.554263928 | 0.003840446 | 0.038817382 | PTGES3P1  |
| ENSG00000131979 | 0.554034855 | 0.004774104 | 0.045290271 | GCH1      |
| ENSG00000146909 | 0.552494165 | 0.000819954 | 0.012269635 | NOM1      |
| ENSG00000117758 | 0.552183173 | 0.000153637 | 0.003338998 | STX12     |
| ENSG00000091527 | 0.552084856 | 0.000193796 | 0.003997002 | CDV3      |
| ENSG00000117868 | 0.551518052 | 0.000892742 | 0.013140151 | ESYT2     |
| ENSG00000071127 | 0.5507976   | 0.000247557 | 0.004833046 | WDR1      |
| ENSG00000169180 | 0.550659626 | 0.002538319 | 0.028788443 | XPO6      |
| ENSG00000068878 | 0.550507479 | 0.000139532 | 0.003086685 | PSME4     |
| ENSG00000186591 | 0.54968695  | 3.09E-06    | 0.00012583  | UBE2H     |
| ENSG00000186416 | 0.548484294 | 0.000382847 | 0.006739036 | NKRF      |
| ENSG00000108256 | 0.54648304  | 0.001849376 | 0.02289309  | NUFIP2    |
| ENSG00000116752 | 0.545552165 | 2.78E-05    | 0.000817796 | BCAS2     |
| ENSG00000137947 | 0.545288879 | 0.000887147 | 0.013093239 | GTF2B     |
| ENSG00000171316 | 0.543232215 | 0.001192184 | 0.016527656 | CHD7      |
| ENSG00000183624 | 0.542814387 | 0.005267382 | 0.048593542 | HMCES     |
| ENSG00000163558 | 0.541986112 | 0.004241908 | 0.04165804  | PRKCI     |
| ENSG00000116560 | 0.539721177 | 0.004462454 | 0.043250965 | SFPQ      |
| ENSG00000173933 | 0.539240146 | 0.00021474  | 0.004352841 | RBM4      |
| ENSG00000146676 | 0.539189518 | 7.88E-05    | 0.001899039 | PURB      |
| ENSG00000109111 | 0.538499451 | 9.35E-06    | 0.000327095 | SUPT6H    |
| ENSG00000197971 | 0.538097827 | 0.004647471 | 0.044446475 | MBP       |
| ENSG00000113712 | 0.53785088  | 0.00178983  | 0.022263618 | CSNK1A1   |
| ENSG00000124228 | 0.537173129 | 0.000237045 | 0.004684212 | DDX27     |
| ENSG00000154642 | 0.534650769 | 0.003332409 | 0.035147437 | C21orf91  |
| ENSG00000113649 | 0.53426336  | 0.005214254 | 0.048300261 | TCERG1    |
| ENSG00000105821 | 0.534163523 | 0.002805544 | 0.031001975 | DNAJC2    |
| ENSG00000178764 | 0.533871288 | 0.001444641 | 0.018997799 | ZHX2      |
| ENSG00000154447 | 0.532902735 | 0.00253199  | 0.028750556 | SH3RF1    |
| ENSG00000112941 | 0.532875114 | 0.000376459 | 0.006644627 | PAPD7     |
| ENSG00000107959 | 0.532519859 | 0.00501897  | 0.047007821 | PITRM1    |
| ENSG00000143153 | 0.53232599  | 0.000229929 | 0.004589032 | ATP1B1    |
| ENSG00000155096 | 0.531187365 | 0.000143411 | 0.003156006 | AZIN1     |
| ENSG00000133773 | 0.528137666 | 0.000495256 | 0.008231842 | CCDC59    |
| ENSG00000140743 | 0.527787982 | 0.000909429 | 0.013316055 | CDR2      |

|                 |             |             |             |          |
|-----------------|-------------|-------------|-------------|----------|
| ENSG00000169446 | 0.52718104  | 0.001753909 | 0.021952203 | MMGT1    |
| ENSG00000163788 | 0.526923713 | 6.63E-05    | 0.001651695 | SNRK     |
| ENSG00000166974 | 0.524450517 | 2.10E-05    | 0.000652057 | MAPRE2   |
| ENSG00000130402 | 0.52419087  | 0.000334068 | 0.00606559  | ACTN4    |
| ENSG00000054267 | 0.523207929 | 0.004523024 | 0.043658625 | ARID4B   |
| ENSG00000073712 | 0.521282271 | 0.002162718 | 0.025704943 | FERMT2   |
| ENSG00000109756 | 0.521043461 | 0.003696162 | 0.037756151 | RAPGEF2  |
| ENSG00000076053 | 0.519767789 | 0.002136063 | 0.025487593 | RBM7     |
| ENSG00000165650 | 0.519580147 | 0.003025469 | 0.032817234 | PDZD8    |
| ENSG00000155256 | 0.518747048 | 0.005439134 | 0.049691467 | ZFYVE27  |
| ENSG00000104695 | 0.517016574 | 0.000701233 | 0.010850029 | PPP2CB   |
| ENSG00000169504 | 0.516314316 | 0.003531172 | 0.036545592 | CLIC4    |
| ENSG00000139496 | 0.51607872  | 0.00037622  | 0.006644627 | NUP58    |
| ENSG00000122696 | 0.516013112 | 0.00067995  | 0.010614904 | SLC25A51 |
| ENSG00000143398 | 0.515898884 | 0.000202482 | 0.00415961  | PIP5K1A  |
| ENSG00000110422 | 0.515848683 | 0.003602058 | 0.03702813  | HIPK3    |
| ENSG00000175073 | 0.515796805 | 0.000860176 | 0.012797086 | VCPIP1   |
| ENSG00000198841 | 0.514274323 | 0.003459554 | 0.036074942 | KTI12    |
| ENSG00000167996 | 0.513339138 | 7.59E-05    | 0.00184459  | FTH1     |
| ENSG00000170836 | 0.512764876 | 1.30E-05    | 0.000429251 | PPM1D    |
| ENSG00000086712 | 0.512349472 | 0.000676109 | 0.010573745 | TXLNG    |
| ENSG00000172115 | 0.511675639 | 0.005224644 | 0.048317303 | CYCS     |
| ENSG00000111737 | 0.509940642 | 4.00E-05    | 0.001087363 | RAB35    |
| ENSG00000100483 | 0.509034338 | 0.002371854 | 0.027633641 | VCPKMT   |
| ENSG00000117139 | 0.508543414 | 0.00210323  | 0.025205728 | KDM5B    |
| ENSG00000112378 | 0.508233596 | 0.002977862 | 0.032409227 | PERP     |
| ENSG00000168066 | 0.508200501 | 1.11E-05    | 0.000374332 | SF1      |
| ENSG00000077044 | 0.508181569 | 0.001334682 | 0.017961436 | DGKD     |
| ENSG00000159176 | 0.508139317 | 0.001161884 | 0.016181551 | CSRP1    |
| ENSG00000177733 | 0.506326129 | 0.003261864 | 0.03457203  | HNRNPA0  |
| ENSG00000131013 | 0.505660398 | 5.55E-05    | 0.001438309 | PPIL4    |
| ENSG00000102390 | 0.504870839 | 0.003018712 | 0.032757633 | PBDC1    |
| ENSG00000123374 | 0.504855788 | 0.005248271 | 0.048459654 | CDK2     |
| ENSG00000060069 | 0.502521883 | 0.003687052 | 0.03767792  | CTDP1    |
| ENSG00000213516 | 0.501010784 | 0.001731428 | 0.021749026 | RBMXL1   |
| ENSG00000087269 | 0.499921836 | 0.002976669 | 0.032409227 | NOP14    |
| ENSG00000163374 | 0.496116373 | 0.000144127 | 0.003169082 | YY1AP1   |
| ENSG00000163875 | 0.495295099 | 0.002686838 | 0.030009774 | MEAF6    |
| ENSG00000143621 | 0.495009891 | 0.000318351 | 0.005853967 | ILF2     |
| ENSG00000169895 | 0.493851099 | 1.23E-05    | 0.000411297 | SYAP1    |
| ENSG00000106635 | 0.492069422 | 0.000228103 | 0.004570168 | BCL7B    |
| ENSG00000178974 | 0.491961044 | 0.005186011 | 0.048085394 | FBXO34   |
| ENSG00000153815 | 0.491871328 | 0.00177817  | 0.022170302 | CMIP     |
| ENSG00000102543 | 0.491300415 | 0.00403291  | 0.040245336 | CDADC1   |
| ENSG0000010404  | 0.489986145 | 0.000238344 | 0.004702717 | IDS      |
| ENSG00000111011 | 0.48914535  | 0.002433294 | 0.028072144 | RSRC2    |
| ENSG00000114933 | 0.486277859 | 0.002489472 | 0.028454552 | INO80D   |
| ENSG00000029363 | 0.483716269 | 6.85E-05    | 0.0016899   | BCLAF1   |
| ENSG00000119048 | 0.483115162 | 1.39E-05    | 0.000456352 | UBE2B    |
| ENSG00000181222 | 0.483031041 | 0.001376003 | 0.01837456  | POLR2A   |
| ENSG00000065526 | 0.482588109 | 0.00049329  | 0.008204422 | SPEN     |
| ENSG00000198964 | 0.482422633 | 0.005312425 | 0.048878077 | SGMS1    |
| ENSG00000103496 | 0.481657668 | 0.002514511 | 0.02865239  | STX4     |
| ENSG00000103342 | 0.48049091  | 0.002677531 | 0.029964475 | GSPT1    |
| ENSG00000140299 | 0.479801193 | 0.0003937   | 0.006897334 | BNIP2    |
| ENSG00000161526 | 0.478481985 | 0.001996028 | 0.024291249 | SAP30BP  |
| ENSG00000025293 | 0.477473715 | 0.002692916 | 0.030064716 | PHF20    |
| ENSG00000113504 | 0.477125284 | 0.001660152 | 0.021063235 | SLC12A7  |
| ENSG00000101150 | 0.476448708 | 0.002043152 | 0.024702528 | TPD52L2  |
| ENSG00000198815 | 0.476175745 | 0.001248152 | 0.017116566 | FOXJ3    |
| ENSG00000102921 | 0.472313683 | 0.001459143 | 0.019120472 | N4BP1    |
| ENSG00000197183 | 0.471508321 | 0.001886931 | 0.023213998 | NOL4L    |
| ENSG00000171490 | 0.471366368 | 0.000413898 | 0.007183272 | RSL1D1   |
| ENSG00000171161 | 0.467856768 | 0.001363782 | 0.018248938 | ZNF672   |
| ENSG00000221823 | 0.467703143 | 1.14E-05    | 0.000383752 | PPP3R1   |
| ENSG00000143549 | 0.467116699 | 2.85E-05    | 0.000831337 | TPM3     |
| ENSG00000102119 | 0.466128112 | 0.00240156  | 0.027862009 | EMD      |
| ENSG00000068323 | 0.465715897 | 0.0003555   | 0.006370028 | TFE3     |
| ENSG00000136141 | 0.465649863 | 0.004147046 | 0.041115501 | LRCH1    |
| ENSG00000109606 | 0.465304827 | 0.002741439 | 0.030451949 | DHX15    |



|                 |             |             |             |          |
|-----------------|-------------|-------------|-------------|----------|
| ENSG00000186141 | 0.464708649 | 0.004415815 | 0.042927214 | POLR3C   |
| ENSG00000107263 | 0.464490424 | 0.003209852 | 0.03418835  | RAPGEF1  |
| ENSG00000136875 | 0.463034838 | 3.65E-05    | 0.001014805 | PRPF4    |
| ENSG00000168264 | 0.462604992 | 0.003854283 | 0.038915711 | IRF2BP2  |
| ENSG00000110925 | 0.459854138 | 0.004992959 | 0.046818693 | CSRNP2   |
| ENSG00000121749 | 0.458631978 | 0.000658154 | 0.010336846 | TBC1D15  |
| ENSG00000088205 | 0.457681056 | 0.000156189 | 0.003371972 | DDX18    |
| ENSG00000123130 | 0.457274867 | 0.00387296  | 0.039024401 | ACOT9    |
| ENSG00000144747 | 0.455679061 | 0.000731886 | 0.011216495 | TMF1     |
| ENSG00000083520 | 0.453070225 | 0.005073553 | 0.047368952 | DIS3     |
| ENSG00000178951 | 0.452742407 | 0.000649598 | 0.010233439 | ZBTB7A   |
| ENSG00000085449 | 0.452673806 | 0.002464323 | 0.028256528 | WDFY1    |
| ENSG00000156671 | 0.452611606 | 0.002994611 | 0.032550559 | SAMD8    |
| ENSG00000185728 | 0.451557344 | 0.002491066 | 0.028460241 | YTHDF3   |
| ENSG00000143319 | 0.451191268 | 0.001257803 | 0.017189382 | ISG20L2  |
| ENSG00000213740 | 0.449442997 | 0.002518941 | 0.028665107 | SERBP1P1 |
| ENSG00000166225 | 0.448452285 | 0.002967083 | 0.032346187 | FRS2     |
| ENSG00000119953 | 0.447994224 | 0.000350694 | 0.006296952 | SMNDC1   |
| ENSG00000170832 | 0.446532855 | 0.003974018 | 0.039887769 | USP32    |
| ENSG00000134352 | 0.446325518 | 0.001990341 | 0.024244786 | IL6ST    |
| ENSG00000108963 | 0.445293277 | 0.001909799 | 0.023417607 | DPH1     |
| ENSG00000180957 | 0.445020263 | 0.001535662 | 0.019832897 | PITPNB   |
| ENSG00000004961 | 0.443968884 | 0.004771886 | 0.045285787 | HCCS     |
| ENSG00000119801 | 0.441349365 | 5.90E-05    | 0.001502222 | YPEL5    |
| ENSG00000131504 | 0.441033884 | 0.003264133 | 0.034581945 | DIAPH1   |
| ENSG00000173120 | 0.437736152 | 0.001066919 | 0.01516006  | KDM2A    |
| ENSG00000067560 | 0.43464957  | 2.56E-05    | 0.000766126 | RHOA     |
| ENSG00000153113 | 0.43459746  | 0.001356472 | 0.018169861 | CAST     |
| ENSG00000147224 | 0.433696048 | 0.002911772 | 0.031917551 | PRPS1    |
| ENSG00000138814 | 0.433475485 | 0.001168918 | 0.016235939 | PPP3CA   |
| ENSG00000090432 | 0.432969674 | 0.004151857 | 0.041135528 | MUL1     |
| ENSG00000089902 | 0.431655545 | 0.001392245 | 0.018543735 | RCOR1    |
| ENSG00000135018 | 0.430079366 | 0.004177861 | 0.041279045 | UBQLN1   |
| ENSG00000112081 | 0.429977649 | 0.00022576  | 0.00453723  | SRSF3    |
| ENSG00000160877 | 0.427791046 | 0.004919846 | 0.046334053 | NACC1    |
| ENSG00000085721 | 0.427774109 | 0.002235305 | 0.026356472 | RRN3     |
| ENSG00000011304 | 0.42605049  | 0.001714114 | 0.021589514 | PTBP1    |
| ENSG00000131149 | 0.425877493 | 0.002003361 | 0.024333294 | GSE1     |
| ENSG00000134108 | 0.423154733 | 0.002404159 | 0.027862009 | ARL8B    |
| ENSG00000166716 | 0.422327202 | 0.000625439 | 0.009943402 | ZNF592   |
| ENSG00000065135 | 0.421616226 | 0.000410175 | 0.007132977 | GNAI3    |
| ENSG00000006634 | 0.421614367 | 0.004490353 | 0.043456439 | DBF4     |
| ENSG00000204469 | 0.419811907 | 0.001675518 | 0.021210864 | PRRC2A   |
| ENSG00000198887 | 0.419544374 | 0.00379886  | 0.038532138 | SMC5     |
| ENSG00000121774 | 0.417495557 | 0.001210119 | 0.016692053 | KHDRBS1  |
| ENSG00000196792 | 0.417147396 | 0.001672233 | 0.021195784 | STRN3    |
| ENSG00000107581 | 0.414144778 | 0.003614602 | 0.037127662 | EIF3A    |
| ENSG00000137814 | 0.413768106 | 0.003051619 | 0.033020851 | HAUS2    |
| ENSG00000170242 | 0.412894833 | 0.004468792 | 0.043280058 | USP47    |
| ENSG00000184007 | 0.412408776 | 0.00041679  | 0.007228633 | PTP4A2   |
| ENSG00000158796 | 0.411818911 | 0.001227824 | 0.016878063 | DEDD     |
| ENSG00000135801 | 0.408890444 | 0.004236765 | 0.04165804  | TAF5L    |
| ENSG00000109670 | 0.407388533 | 0.003238194 | 0.034405476 | FBXW7    |
| ENSG00000198060 | 0.406008222 | 0.00024789  | 0.004835896 | 5-Mar    |
| ENSG00000122482 | 0.405459753 | 0.003988726 | 0.039988979 | ZNF644   |
| ENSG00000182606 | 0.402865523 | 0.002727266 | 0.030349537 | TRAK1    |
| ENSG00000138660 | 0.401885546 | 0.005112453 | 0.047612242 | AP1AR    |
| ENSG00000004897 | 0.401831614 | 0.005335984 | 0.049042668 | CDC27    |
| ENSG00000169375 | 0.399490065 | 0.002095177 | 0.025144056 | SIN3A    |
| ENSG00000082153 | 0.398697612 | 0.005083374 | 0.047392458 | BZW1     |
| ENSG00000205937 | 0.398658569 | 0.002180266 | 0.025889789 | RNPS1    |
| ENSG00000116095 | 0.396576968 | 0.000542205 | 0.008864555 | PLEKHA3  |
| ENSG00000148335 | 0.395100509 | 0.005080595 | 0.047383579 | NTMT1    |
| ENSG00000131408 | 0.395072633 | 0.003904011 | 0.039261033 | NR1H2    |
| ENSG00000148516 | 0.394423464 | 0.000942037 | 0.013708402 | ZEB1     |
| ENSG00000179562 | 0.394028141 | 0.004533146 | 0.043707546 | GCC1     |
| ENSG00000073921 | 0.391176326 | 0.000424298 | 0.007324576 | PICALM   |
| ENSG00000069345 | 0.384847994 | 0.000586688 | 0.009443054 | DNAJA2   |
| ENSG00000108061 | 0.384070539 | 0.002087384 | 0.025062134 | SHOC2    |
| ENSG00000126653 | 0.382410918 | 0.000712237 | 0.010973696 | NSRP1    |

|                 |              |             |             |          |
|-----------------|--------------|-------------|-------------|----------|
| ENSG00000175104 | 0.382402461  | 0.000404891 | 0.007069411 | TRAF6    |
| ENSG00000126524 | 0.381368999  | 0.004989428 | 0.046802497 | SBDS     |
| ENSG00000099783 | 0.381002282  | 0.003526376 | 0.036545592 | HNRNPM   |
| ENSG00000095787 | 0.379256199  | 0.000640145 | 0.010121398 | WAC      |
| ENSG00000091436 | 0.378150927  | 0.003542659 | 0.036591493 | MAP3K20  |
| ENSG00000092203 | 0.377228732  | 0.000241728 | 0.004751411 | TOX4     |
| ENSG00000175376 | 0.376929697  | 0.000388997 | 0.006824155 | EIF1AD   |
| ENSG00000109381 | 0.376877758  | 0.001872104 | 0.02309729  | ELF2     |
| ENSG00000110075 | 0.372375002  | 0.000698112 | 0.010826785 | PPP6R3   |
| ENSG00000075785 | 0.371195873  | 3.54E-05    | 0.00098776  | RAB7A    |
| ENSG00000197694 | 0.368868265  | 0.004792705 | 0.045450122 | SPTAN1   |
| ENSG00000149658 | 0.364503344  | 0.002242917 | 0.026416126 | YTHDF1   |
| ENSG00000171475 | 0.363434786  | 0.004074057 | 0.040531239 | WIPF2    |
| ENSG00000177425 | 0.362067302  | 0.00125736  | 0.017189382 | PAWR     |
| ENSG00000107771 | 0.36076726   | 0.001505797 | 0.019534705 | CCSER2   |
| ENSG00000070756 | 0.356341286  | 0.002215222 | 0.026180347 | PABPC1   |
| ENSG00000169564 | 0.356341127  | 0.005273798 | 0.048610595 | PCBP1    |
| ENSG00000101911 | 0.355215363  | 0.001718754 | 0.021626957 | PRPS2    |
| ENSG00000152242 | 0.354712051  | 0.00047977  | 0.008051813 | C18orf25 |
| ENSG00000213281 | 0.350631112  | 0.004716701 | 0.044904072 | NRAS     |
| ENSG00000135932 | 0.349972254  | 0.005008857 | 0.046936486 | CAB39    |
| ENSG00000128989 | 0.349012184  | 0.003718276 | 0.037907426 | ARPP19   |
| ENSG00000084463 | 0.348403771  | 0.000914233 | 0.013371302 | WBP11    |
| ENSG00000134371 | 0.347475797  | 0.003492869 | 0.036294208 | CDC73    |
| ENSG00000163510 | 0.345225984  | 0.005029654 | 0.04702681  | CWC22    |
| ENSG00000126261 | 0.344689325  | 0.004604993 | 0.044150368 | UBA2     |
| ENSG00000122692 | 0.343606491  | 0.000767019 | 0.011658514 | SMU1     |
| ENSG00000197879 | 0.337537953  | 0.002917589 | 0.031954312 | MYO1C    |
| ENSG00000140320 | 0.33648829   | 0.00544468  | 0.049724628 | BAHD1    |
| ENSG00000164808 | 0.335030735  | 0.002799459 | 0.030974315 | SPIDR    |
| ENSG00000167182 | 0.33415143   | 0.000808691 | 0.012163645 | SP2      |
| ENSG00000157540 | 0.331528351  | 0.003650155 | 0.03743055  | DYRK1A   |
| ENSG00000068354 | 0.328108104  | 0.004320172 | 0.042298557 | TBC1D25  |
| ENSG00000099995 | 0.327813499  | 0.002538656 | 0.028788443 | SF3A1    |
| ENSG00000128908 | 0.32758562   | 0.005009139 | 0.046936486 | INO80    |
| ENSG00000140455 | 0.325918936  | 0.003381223 | 0.035393364 | USP3     |
| ENSG00000197555 | 0.322696431  | 2.45E-05    | 0.00074136  | SIPA1L1  |
| ENSG00000062650 | 0.321368937  | 0.005421136 | 0.049579412 | WAPL     |
| ENSG00000140829 | 0.3149025    | 0.000980503 | 0.014156996 | DHX38    |
| ENSG00000154945 | 0.312950284  | 0.002076012 | 0.02496024  | ANKRD40  |
| ENSG00000158545 | 0.31214953   | 0.000469686 | 0.007933894 | ZC3H18   |
| ENSG00000114416 | 0.311741661  | 0.00455782  | 0.043847678 | FXR1     |
| ENSG00000120616 | 0.30316425   | 0.003202663 | 0.034125788 | EPC1     |
| ENSG00000180228 | 0.302585384  | 0.001654822 | 0.021025741 | PRKRA    |
| ENSG00000131626 | 0.302182491  | 0.004009252 | 0.040070902 | PPFIA1   |
| ENSG00000257923 | 0.29799868   | 0.00408607  | 0.040635172 | CUX1     |
| ENSG00000130703 | 0.297289541  | 0.000366399 | 0.006506898 | OSBPL2   |
| ENSG00000162923 | 0.290114793  | 0.003355899 | 0.035266162 | WDR26    |
| ENSG00000204256 | 0.276291177  | 0.001644832 | 0.020920002 | BRD2     |
| ENSG00000156304 | 0.266156741  | 0.00123973  | 0.017019073 | SCAF4    |
| ENSG00000106052 | 0.259790946  | 0.004801921 | 0.045503923 | TAX1BP1  |
| ENSG00000086589 | 0.25133757   | 0.003714136 | 0.037893164 | RBM22    |
| ENSG00000075413 | 0.231090799  | 0.002605188 | 0.02934684  | MARK3    |
| ENSG00000107341 | 0.22680899   | 0.003751522 | 0.038171372 | UBE2R2   |
| ENSG00000160695 | -0.285465302 | 4.44E-05    | 0.001182946 | VPS11    |
| ENSG00000164465 | -0.293267693 | 0.003494293 | 0.036294208 | DCBLD1   |
| ENSG00000204977 | -0.320014883 | 0.002367675 | 0.027633641 | TRIM13   |
| ENSG00000178988 | -0.320624715 | 0.001503651 | 0.019518508 | MRFAP1L1 |
| ENSG00000124608 | -0.329664698 | 0.001341537 | 0.018021573 | AARS2    |
| ENSG00000055147 | -0.330329221 | 0.00438032  | 0.042664199 | FAM114A2 |
| ENSG00000009830 | -0.331197423 | 0.001339337 | 0.018005406 | POMT2    |
| ENSG00000185379 | -0.334670171 | 0.001494229 | 0.019442964 | RAD51D   |
| ENSG00000159445 | -0.33511809  | 0.003600723 | 0.03702813  | THEM4    |
| ENSG00000164576 | -0.347443956 | 0.000715332 | 0.011001781 | SAP30L   |
| ENSG00000053900 | -0.350018378 | 0.001577324 | 0.02026002  | ANAPC4   |
| ENSG00000047932 | -0.350977479 | 0.004664629 | 0.044577365 | GOPC     |
| ENSG00000111731 | -0.361560692 | 0.003371114 | 0.035368753 | C2CD5    |
| ENSG00000196312 | -0.363835121 | 0.003611756 | 0.037113122 | MFSD14C  |
| ENSG00000159596 | -0.364751043 | 0.001302227 | 0.017616053 | TMEM69   |
| ENSG00000065029 | -0.368209877 | 0.002938207 | 0.032139431 | ZNF76    |

|                 |              |             |             |            |
|-----------------|--------------|-------------|-------------|------------|
| ENSG00000146802 | -0.372054015 | 0.002143949 | 0.025540364 | TMEM168    |
| ENSG00000215041 | -0.376242797 | 0.001923115 | 0.023533774 | NEURL4     |
| ENSG00000105829 | -0.377168994 | 0.004721065 | 0.044904072 | BET1       |
| ENSG00000151445 | -0.377426156 | 0.005227267 | 0.048317303 | VIPAS39    |
| ENSG00000105393 | -0.378315941 | 0.0054119   | 0.049519474 | BABAM1     |
| ENSG00000159199 | -0.38167204  | 0.003553761 | 0.036667051 | ATP5G1     |
| ENSG00000108666 | -0.384662578 | 0.005327025 | 0.04898805  | C17orf75   |
| ENSG00000136444 | -0.389865631 | 0.002542354 | 0.02881779  | RSAD1      |
| ENSG00000151148 | -0.390241463 | 0.003339622 | 0.035180606 | UBE3B      |
| ENSG00000173409 | -0.392154659 | 0.00111366  | 0.015662986 | ARV1       |
| ENSG00000143643 | -0.394865525 | 0.005433719 | 0.04965948  | TTC13      |
| ENSG00000114026 | -0.396214669 | 0.000386345 | 0.006786802 | OGG1       |
| ENSG00000131495 | -0.402330074 | 0.00536873  | 0.049238977 | NDUFA2     |
| ENSG00000155729 | -0.403850612 | 0.00285711  | 0.031411262 | KCTD18     |
| ENSG00000119906 | -0.406321237 | 0.000273028 | 0.005222546 | SLF2       |
| ENSG00000227372 | -0.408607816 | 0.001669228 | 0.021168036 | TP73-AS1   |
| ENSG00000214022 | -0.410354927 | 0.001860318 | 0.023006584 | REPIN1     |
| ENSG00000189339 | -0.410896684 | 0.004961455 | 0.046598884 | SLC35E2B   |
| ENSG00000151474 | -0.413907556 | 0.003653346 | 0.03743055  | FRMD4A     |
| ENSG00000235106 | -0.417751248 | 0.002747801 | 0.030503049 | LINC00094  |
| ENSG00000238045 | -0.418733514 | 0.00466803  | 0.044577365 | AC009133.1 |
| ENSG00000155229 | -0.41914021  | 2.55E-06    | 0.000106224 | MMS19      |
| ENSG00000196704 | -0.420913143 | 0.000606757 | 0.009693921 | AMZ2       |
| ENSG00000165792 | -0.421429092 | 0.00383071  | 0.038755601 | METT17     |
| ENSG00000276234 | -0.423220071 | 0.004906712 | 0.046236158 | TADA2A     |
| ENSG00000043514 | -0.426498437 | 0.001364886 | 0.018254291 | TRIT1      |
| ENSG00000107672 | -0.426611211 | 0.001632108 | 0.020778541 | NSMCE4A    |
| ENSG00000185917 | -0.428465992 | 0.001085551 | 0.015387011 | SETD4      |
| ENSG00000099795 | -0.429666444 | 0.00493448  | 0.046438164 | NDUFB7     |
| ENSG00000186104 | -0.429783755 | 6.81E-05    | 0.001682743 | CYP2R1     |
| ENSG00000118518 | -0.429925109 | 0.003254988 | 0.034527358 | RNF146     |
| ENSG00000116213 | -0.43060095  | 3.09E-06    | 0.00012583  | WRAP73     |
| ENSG00000120458 | -0.430886362 | 0.002312917 | 0.027117467 | MSANTD2    |
| ENSG00000163867 | -0.43157755  | 0.002249241 | 0.026466576 | ZMYM6      |
| ENSG00000091732 | -0.431919926 | 0.002408813 | 0.027876481 | ZC3HC1     |
| ENSG00000014123 | -0.438267852 | 0.002080974 | 0.024996733 | UFL1       |
| ENSG00000147118 | -0.445285582 | 0.00182724  | 0.022662314 | ZNF182     |
| ENSG00000001461 | -0.445372329 | 0.003535823 | 0.036564553 | NIPAL3     |
| ENSG00000133895 | -0.446357488 | 0.00148261  | 0.019330554 | MEN1       |
| ENSG00000136631 | -0.45102088  | 0.003042474 | 0.032960351 | VPS45      |
| ENSG00000006530 | -0.451090869 | 0.001134614 | 0.015869914 | AGK        |
| ENSG00000068097 | -0.452527412 | 0.000618856 | 0.009865399 | HEATR6     |
| ENSG00000214194 | -0.454408781 | 0.002529447 | 0.028744545 | SMIM30     |
| ENSG00000237765 | -0.457314631 | 0.002370234 | 0.027633641 | FAM200B    |
| ENSG00000124574 | -0.457665637 | 8.70E-05    | 0.00207135  | ABCC10     |
| ENSG00000183309 | -0.459543694 | 0.003218017 | 0.034247193 | ZNF623     |
| ENSG00000075336 | -0.460919571 | 0.001501604 | 0.01950957  | TIMM21     |
| ENSG00000148399 | -0.465346082 | 0.003506119 | 0.036387909 | DPH7       |
| ENSG00000221838 | -0.466787952 | 0.001425328 | 0.018817214 | AP4M1      |
| ENSG00000155636 | -0.467012713 | 0.004947621 | 0.046511218 | RBM45      |
| ENSG00000215012 | -0.468315016 | 0.001357326 | 0.018171915 | RTL10      |
| ENSG00000010322 | -0.468593711 | 0.003103422 | 0.033314598 | NISCH      |
| ENSG00000273015 | -0.468962126 | 0.001272529 | 0.017322684 | AC008124.1 |
| ENSG00000135828 | -0.46986036  | 0.004602599 | 0.044150368 | RNASEL     |
| ENSG00000189319 | -0.470340586 | 0.002720987 | 0.030312897 | FAM53B     |
| ENSG00000124181 | -0.471728845 | 0.004415023 | 0.042927214 | PLCG1      |
| ENSG00000188092 | -0.473695238 | 0.00167903  | 0.021240426 | GPR89B     |
| ENSG00000167785 | -0.474294958 | 0.0037367   | 0.03806534  | ZNF558     |
| ENSG00000132646 | -0.474782519 | 0.003323295 | 0.035065555 | PCNA       |
| ENSG00000135315 | -0.475684945 | 0.003857662 | 0.038915711 | CEP162     |
| ENSG00000150433 | -0.479563768 | 0.003655631 | 0.03743055  | TMEM218    |
| ENSG00000167380 | -0.480877243 | 0.001878327 | 0.023130071 | ZNF226     |
| ENSG00000162222 | -0.481333762 | 1.39E-05    | 0.000456821 | TTC9C      |
| ENSG00000120699 | -0.48179434  | 0.001278098 | 0.017371148 | EXOSC8     |
| ENSG00000239779 | -0.482557535 | 0.003802101 | 0.038534884 | WBP1       |
| ENSG00000151366 | -0.483970177 | 0.001789945 | 0.022263618 | NDUFC2     |
| ENSG00000112367 | -0.484519926 | 0.002267247 | 0.026654281 | FIG4       |
| ENSG00000014138 | -0.485945943 | 0.005351912 | 0.049154232 | POLA2      |
| ENSG00000118418 | -0.487615654 | 0.004449258 | 0.043187596 | HMGN3      |
| ENSG00000143971 | -0.491208198 | 0.000635622 | 0.010078687 | ETAA1      |

|                 |              |             |             |            |
|-----------------|--------------|-------------|-------------|------------|
| ENSG00000169740 | -0.493262174 | 0.004289872 | 0.042049499 | ZNF32      |
| ENSG00000186017 | -0.494699313 | 0.003489239 | 0.036294208 | ZNF566     |
| ENSG00000050426 | -0.49479696  | 0.000491071 | 0.008178007 | LETMD1     |
| ENSG00000076650 | -0.498549092 | 8.75E-05    | 0.002078157 | GPATCH1    |
| ENSG00000103248 | -0.498907803 | 0.001129289 | 0.015821026 | MTHFSD     |
| ENSG00000136098 | -0.500423025 | 0.004676296 | 0.044636318 | NEK3       |
| ENSG00000148835 | -0.50227455  | 0.002465612 | 0.028256528 | TAF5       |
| ENSG00000134897 | -0.503347628 | 0.003854439 | 0.038915711 | BIVM       |
| ENSG00000181896 | -0.506218667 | 0.000619011 | 0.009865399 | ZNF101     |
| ENSG00000125247 | -0.507537924 | 0.001134017 | 0.015869914 | TMTC4      |
| ENSG00000110717 | -0.507594045 | 0.002224822 | 0.026262612 | NDUFS8     |
| ENSG00000159792 | -0.507809435 | 0.002044547 | 0.024707874 | PSKH1      |
| ENSG00000111850 | -0.510953564 | 0.001856999 | 0.022976493 | SMIM8      |
| ENSG00000183513 | -0.512268158 | 0.002840062 | 0.031290124 | COA5       |
| ENSG00000264538 | -0.51314899  | 0.00367654  | 0.037600116 | SUZ12P1    |
| ENSG00000198551 | -0.51325101  | 0.000893271 | 0.013140151 | ZNF627     |
| ENSG00000111653 | -0.513724877 | 0.002404955 | 0.027862009 | ING4       |
| ENSG00000143224 | -0.513799938 | 0.000421242 | 0.007286362 | PPOX       |
| ENSG00000111224 | -0.514440621 | 0.002138437 | 0.025488883 | PARP11     |
| ENSG00000163463 | -0.517246817 | 0.004453368 | 0.043211324 | KRTCAP2    |
| ENSG00000143258 | -0.519384751 | 0.001324625 | 0.017853882 | USP21      |
| ENSG00000131788 | -0.522612432 | 0.005021887 | 0.047007821 | PIAS3      |
| ENSG00000236287 | -0.523035676 | 4.14E-05    | 0.001119523 | ZBED5      |
| ENSG00000108799 | -0.523320833 | 0.003995095 | 0.039993491 | EZH1       |
| ENSG00000101452 | -0.524487723 | 0.002922019 | 0.031982654 | DHX35      |
| ENSG00000145416 | -0.52647485  | 0.003201868 | 0.034125788 | 1-Mar      |
| ENSG00000197162 | -0.527818008 | 0.002371802 | 0.027633641 | ZNF785     |
| ENSG00000064933 | -0.529310503 | 0.002487996 | 0.028450222 | PMS1       |
| ENSG00000198912 | -0.530935869 | 0.001533742 | 0.019817964 | C1orf174   |
| ENSG00000196290 | -0.533868818 | 0.002073667 | 0.024943611 | NIF3L1     |
| ENSG00000139651 | -0.534234526 | 0.000977638 | 0.014131361 | ZNF740     |
| ENSG00000198040 | -0.538133573 | 0.0003845   | 0.006763549 | ZNF84      |
| ENSG00000187815 | -0.539065311 | 0.001986855 | 0.02421369  | ZFP69      |
| ENSG00000169592 | -0.539921391 | 0.001579954 | 0.020273728 | INO80E     |
| ENSG00000148950 | -0.54060843  | 0.004099792 | 0.040720181 | IMMP1L     |
| ENSG00000197362 | -0.542226527 | 0.00140689  | 0.018657311 | ZNF786     |
| ENSG00000112983 | -0.544519086 | 0.001605756 | 0.020504675 | BRD8       |
| ENSG00000164414 | -0.551706993 | 0.00025096  | 0.004877463 | SLC35A1    |
| ENSG00000186812 | -0.552651946 | 0.003239848 | 0.034408961 | ZNF397     |
| ENSG00000135722 | -0.552816179 | 0.001690226 | 0.021361233 | FBXL8      |
| ENSG00000179523 | -0.555492813 | 0.0011256   | 0.015779917 | EIF3J-AS1  |
| ENSG00000011143 | -0.558623986 | 0.001999753 | 0.024324006 | MKS1       |
| ENSG00000130772 | -0.560734815 | 0.000565321 | 0.009178854 | MED18      |
| ENSG00000167291 | -0.560809468 | 0.002155297 | 0.025640233 | TBC1D16    |
| ENSG00000174365 | -0.561573988 | 0.002673972 | 0.029943407 | SNHG11     |
| ENSG00000133460 | -0.562680519 | 0.005231478 | 0.0483218   | SLC2A11    |
| ENSG00000146556 | -0.563019121 | 0.00518136  | 0.048064202 | WASH2P     |
| ENSG00000166965 | -0.563419291 | 0.000985006 | 0.014214113 | RCCD1      |
| ENSG00000245680 | -0.563512822 | 0.004718038 | 0.044904072 | ZNF585B    |
| ENSG00000165819 | -0.563560021 | 0.00063589  | 0.010078687 | METTL3     |
| ENSG00000178188 | -0.563913373 | 0.001164096 | 0.016194982 | SH2B1      |
| ENSG00000074582 | -0.566261459 | 0.002853876 | 0.031402315 | BCS1L      |
| ENSG00000272419 | -0.568958302 | 0.002706568 | 0.030191146 | AC241585.2 |
| ENSG00000103199 | -0.569004735 | 0.000253404 | 0.004917584 | ZNF500     |
| ENSG00000188177 | -0.571466233 | 0.004222189 | 0.041558771 | ZC3H6      |
| ENSG00000105967 | -0.571857407 | 0.004803497 | 0.045503923 | TFEC       |
| ENSG00000197629 | -0.572953048 | 0.003054164 | 0.033023414 | MPEG1      |
| ENSG00000115392 | -0.574570089 | 0.002035864 | 0.024637376 | FANCL      |
| ENSG00000188542 | -0.577490906 | 0.000903342 | 0.013253343 | DUSP28     |
| ENSG00000186376 | -0.578340133 | 0.003182815 | 0.033970105 | ZNF75D     |
| ENSG00000084774 | -0.581873609 | 0.002619294 | 0.029460163 | CAD        |
| ENSG00000010292 | -0.58449643  | 0.000796578 | 0.01201629  | NCAPD2     |
| ENSG00000139719 | -0.587440299 | 0.000267527 | 0.005134068 | VPS33A     |
| ENSG00000130731 | -0.587920337 | 0.004517452 | 0.043625392 | METTL26    |
| ENSG00000007202 | -0.590593968 | 0.003554214 | 0.036667051 | KIAA0100   |
| ENSG00000173369 | -0.592467689 | 0.001675876 | 0.021210864 | C1QB       |
| ENSG00000183723 | -0.596785489 | 0.003190373 | 0.034036771 | CMTM4      |
| ENSG00000204271 | -0.598230014 | 0.000576976 | 0.009326501 | SPIN3      |
| ENSG00000176444 | -0.598242702 | 7.08E-06    | 0.000256776 | CLK2       |
| ENSG00000180376 | -0.598514717 | 0.002244308 | 0.026420511 | CCDC66     |

|                 |              |             |             |            |
|-----------------|--------------|-------------|-------------|------------|
| ENSG00000183718 | -0.598630446 | 0.000781989 | 0.01185133  | TRIM52     |
| ENSG00000172349 | -0.600047088 | 0.003341916 | 0.035190482 | IL16       |
| ENSG00000175701 | -0.600081854 | 0.002966585 | 0.032346187 | LINC00116  |
| ENSG00000249042 | -0.600469605 | 0.002583532 | 0.029155488 | AC008771.1 |
| ENSG00000277476 | -0.60403815  | 0.002148152 | 0.025578688 | AC005332.8 |
| ENSG00000148444 | -0.604197384 | 0.000832163 | 0.012430229 | COMMD3     |
| ENSG00000188234 | -0.605364738 | 0.001461479 | 0.019131956 | AGAP4      |
| ENSG00000136514 | -0.606523349 | 0.004907669 | 0.046236158 | RTP4       |
| ENSG00000114735 | -0.607983116 | 0.003540684 | 0.036585659 | HEMK1      |
| ENSG00000115459 | -0.609189237 | 0.000919704 | 0.013436169 | ELMOD3     |
| ENSG00000164002 | -0.609949553 | 1.13E-05    | 0.000381902 | EXO5       |
| ENSG00000198169 | -0.613669252 | 0.00024566  | 0.004817764 | ZNF251     |
| ENSG00000010295 | -0.616550799 | 0.003359716 | 0.035291979 | IFFO1      |
| ENSG00000132801 | -0.618649712 | 0.003055932 | 0.033023414 | ZSWIM3     |
| ENSG00000108848 | -0.619129928 | 0.000156213 | 0.003371972 | LUC7L3     |
| ENSG00000184939 | -0.620684947 | 0.000898501 | 0.013200742 | ZFP90      |
| ENSG00000262814 | -0.622651728 | 0.002102053 | 0.02520327  | MRPL12     |
| ENSG00000254726 | -0.62266613  | 0.003473255 | 0.036191593 | MEX3A      |
| ENSG00000178175 | -0.625330795 | 0.003754132 | 0.038182951 | ZNF366     |
| ENSG00000178096 | -0.625390812 | 0.004712465 | 0.044902543 | BOLA1      |
| ENSG00000165275 | -0.626287273 | 4.69E-06    | 0.000180913 | TRMT10B    |
| ENSG00000274895 | -0.626681714 | 0.004168799 | 0.041205204 | AC011700.1 |
| ENSG00000171806 | -0.628164979 | 0.000308871 | 0.005726819 | METTL18    |
| ENSG00000173275 | -0.628322159 | 0.003675358 | 0.037600116 | ZNF449     |
| ENSG00000128699 | -0.62885324  | 8.89E-07    | 4.20E-05    | ORMDL1     |
| ENSG00000198081 | -0.629699627 | 0.000791747 | 0.011959293 | ZBTB14     |
| ENSG00000103494 | -0.6333844   | 0.004719591 | 0.044904072 | RPGRIP1L   |
| ENSG00000274828 | -0.633788585 | 0.004602491 | 0.044150368 | AC068473.5 |
| ENSG00000182742 | -0.635039776 | 0.003119096 | 0.03345517  | HOXB4      |
| ENSG00000169964 | -0.635333337 | 0.002905191 | 0.031872335 | TMEM42     |
| ENSG00000175548 | -0.638835615 | 3.81E-05    | 0.001048972 | ALG10B     |
| ENSG00000100802 | -0.639499257 | 0.0004896   | 0.008163987 | C14orf93   |
| ENSG00000100359 | -0.642929486 | 0.003580119 | 0.036875654 | SGSM3      |
| ENSG00000213918 | -0.64348454  | 0.000462838 | 0.007848877 | DNASE1     |
| ENSG00000204282 | -0.64385561  | 0.00542461  | 0.049593703 | TNRC6C-AS1 |
| ENSG00000251369 | -0.643857497 | 0.00078283  | 0.011857158 | ZNF550     |
| ENSG00000134297 | -0.644103953 | 0.002785883 | 0.030863585 | PLEKHA8P1  |
| ENSG00000135637 | -0.647229576 | 0.001455754 | 0.019107953 | CCDC142    |
| ENSG00000173611 | -0.64826244  | 0.000340889 | 0.006176466 | SCAI       |
| ENSG00000174151 | -0.651506088 | 0.001414823 | 0.018719526 | CYB561D1   |
| ENSG00000214135 | -0.653594353 | 0.00087366  | 0.012975377 | AC132008.2 |
| ENSG00000103343 | -0.655009256 | 0.000257449 | 0.004981188 | ZNF174     |
| ENSG00000197128 | -0.656761749 | 0.000467244 | 0.00790295  | ZNF772     |
| ENSG00000280798 | -0.658337885 | 0.003336965 | 0.035167921 | LINC00294  |
| ENSG00000113971 | -0.658388041 | 0.001249277 | 0.017122944 | NPHP3      |
| ENSG00000154743 | -0.659244013 | 0.000132342 | 0.002939853 | TSEN2      |
| ENSG00000175611 | -0.662251838 | 0.004926993 | 0.046384529 | LINC00476  |
| ENSG00000116001 | -0.662532937 | 0.001264735 | 0.017270955 | TIA1       |
| ENSG00000140326 | -0.663058258 | 7.45E-05    | 0.001813024 | CDAN1      |
| ENSG00000178977 | -0.665096051 | 0.000767777 | 0.011663205 | LINC00324  |
| ENSG00000101751 | -0.6655598   | 3.12E-06    | 0.000126512 | POLI       |
| ENSG00000106066 | -0.666091798 | 0.00405072  | 0.040345487 | CPVL       |
| ENSG00000197044 | -0.667295847 | 0.002418968 | 0.027944139 | ZNF441     |
| ENSG00000174804 | -0.667364015 | 0.001277641 | 0.017371148 | FZD4       |
| ENSG00000218510 | -0.667832782 | 0.000750463 | 0.011440366 | LINC00339  |
| ENSG00000221909 | -0.669871942 | 1.19E-05    | 0.000398076 | FAM200A    |
| ENSG00000261799 | -0.670328916 | 0.002335048 | 0.027339872 | AC007406.5 |
| ENSG00000139679 | -0.670653427 | 0.000189345 | 0.003927047 | LPAR6      |
| ENSG00000183111 | -0.671745789 | 0.003224254 | 0.034285454 | ARHGEF37   |
| ENSG00000164011 | -0.674305337 | 0.001424946 | 0.018817214 | ZNF691     |
| ENSG00000169413 | -0.674412144 | 0.00421091  | 0.041494979 | RNASE6     |
| ENSG00000166927 | -0.676365449 | 0.003286598 | 0.034758935 | MS4A7      |
| ENSG00000215271 | -0.679601647 | 0.003135759 | 0.03357838  | HOMEZ      |
| ENSG00000100271 | -0.679901514 | 0.001601418 | 0.020488361 | TTLL1      |
| ENSG00000196981 | -0.681493685 | 0.000459688 | 0.00781078  | WDR5B      |
| ENSG00000125846 | -0.682807213 | 1.94E-05    | 0.000607342 | ZNF133     |
| ENSG00000105497 | -0.683480214 | 2.11E-05    | 0.000654524 | ZNF175     |
| ENSG00000105609 | -0.683694694 | 0.002066406 | 0.024867801 | LILRB5     |
| ENSG00000186666 | -0.684792364 | 0.00047631  | 0.008010799 | BCDIN3D    |
| ENSG00000141219 | -0.684968989 | 0.000927202 | 0.013522866 | C17orf80   |

|                 |              |             |             |             |
|-----------------|--------------|-------------|-------------|-------------|
| ENSG00000263072 | -0.685219491 | 0.00097697  | 0.014129579 | ZNF213-AS1  |
| ENSG00000007312 | -0.687770376 | 0.001885555 | 0.023208064 | CD79B       |
| ENSG00000128694 | -0.68848128  | 0.00125456  | 0.017173693 | OSGEPL1     |
| ENSG00000099326 | -0.689666528 | 0.00049968  | 0.008294756 | MZF1        |
| ENSG00000176896 | -0.69057026  | 0.004818574 | 0.045612079 | TCEANC      |
| ENSG00000236144 | -0.690996522 | 0.001540368 | 0.019873886 | TMEM147-AS1 |
| ENSG00000281162 | -0.691970161 | 0.003165004 | 0.033821743 | AC005035.1  |
| ENSG00000204176 | -0.693079385 | 0.002894893 | 0.031772794 | SYT15       |
| ENSG00000122678 | -0.695362553 | 0.001824906 | 0.022644194 | POLM        |
| ENSG00000169683 | -0.696659662 | 0.00318017  | 0.033955843 | LRRC45      |
| ENSG00000154016 | -0.696685242 | 0.002559563 | 0.028987529 | GRAP        |
| ENSG00000173209 | -0.697082665 | 0.003512533 | 0.036439896 | AHSA2       |
| ENSG00000089335 | -0.698391314 | 0.000491018 | 0.008178007 | ZNF302      |
| ENSG00000089091 | -0.698981245 | 0.005273985 | 0.048610595 | DZANK1      |
| ENSG00000233184 | -0.702180711 | 0.000543514 | 0.008869193 | AC093157.1  |
| ENSG00000163472 | -0.703492239 | 0.000347881 | 0.00626813  | TMEM79      |
| ENSG00000197372 | -0.704123898 | 0.003292193 | 0.034793993 | ZNF675      |
| ENSG00000162227 | -0.704442902 | 0.001655577 | 0.021025741 | TAF6L       |
| ENSG00000155659 | -0.70793314  | 0.000747877 | 0.0114212   | VSIG4       |
| ENSG00000163516 | -0.709916676 | 1.02E-05    | 0.000348894 | ANKZF1      |
| ENSG00000220785 | -0.711943044 | 0.004903623 | 0.046231614 | MTMR9LP     |
| ENSG00000122481 | -0.713574154 | 0.00024021  | 0.004725158 | RWDD3       |
| ENSG00000151065 | -0.716541516 | 2.50E-05    | 0.000752147 | DCP1B       |
| ENSG00000259943 | -0.718575668 | 0.000427888 | 0.007371841 | AL050341.2  |
| ENSG00000272760 | -0.719213462 | 0.000154403 | 0.003346812 | AC093726.1  |
| ENSG00000243335 | -0.720044193 | 0.000231105 | 0.004599563 | KCTD7       |
| ENSG00000110077 | -0.7205389   | 0.000440973 | 0.007552127 | MS4A6A      |
| ENSG00000159189 | -0.721199902 | 0.000590817 | 0.009474257 | C1QC        |
| ENSG00000233901 | -0.721334523 | 0.001381925 | 0.018434667 | LINC01503   |
| ENSG00000197782 | -0.722494836 | 0.004591433 | 0.044105636 | ZNF780A     |
| ENSG00000263002 | -0.722617178 | 0.001010148 | 0.014520386 | ZNF234      |
| ENSG00000120253 | -0.723450571 | 3.94E-05    | 0.001077156 | NUP43       |
| ENSG00000234444 | -0.725472066 | 0.000115108 | 0.002610667 | ZNF736      |
| ENSG00000178573 | -0.72728348  | 0.0002832   | 0.005347825 | MAF         |
| ENSG00000161929 | -0.72813709  | 1.76E-05    | 0.000559326 | SCIMP       |
| ENSG00000204650 | -0.728709924 | 0.00015398  | 0.003343239 | LINC02210   |
| ENSG00000175970 | -0.729436646 | 0.000282913 | 0.005346291 | UNC119B     |
| ENSG00000164241 | -0.731300462 | 0.002632285 | 0.029553117 | C5orf63     |
| ENSG00000138380 | -0.734674603 | 0.001709636 | 0.021543577 | CARF        |
| ENSG00000239911 | -0.736276325 | 0.002750278 | 0.030508213 | PRKAG2-AS1  |
| ENSG00000117010 | -0.737159731 | 1.79E-05    | 0.000566494 | ZNF684      |
| ENSG00000083814 | -0.739484401 | 0.000351472 | 0.006306557 | ZNF671      |
| ENSG00000162639 | -0.740847165 | 0.003818464 | 0.038670516 | HENMT1      |
| ENSG00000173914 | -0.743647926 | 1.83E-05    | 0.000575873 | RBM4B       |
| ENSG00000255182 | -0.745181668 | 0.003380643 | 0.035393364 | AC084125.2  |
| ENSG00000235314 | -0.74772965  | 0.000332605 | 0.006055982 | LINC00957   |
| ENSG00000198221 | -0.748292642 | 0.000378725 | 0.006675539 | AFDN-AS1    |
| ENSG00000234420 | -0.74934645  | 0.000288441 | 0.005417671 | ZNF37BP     |
| ENSG00000263272 | -0.749977621 | 0.003562442 | 0.03671742  | AC004148.2  |
| ENSG00000144026 | -0.751660355 | 1.74E-06    | 7.57E-05    | ZNF514      |
| ENSG00000168517 | -0.751948269 | 0.001573501 | 0.020220933 | HEXIM2      |
| ENSG00000185220 | -0.752007216 | 0.003668119 | 0.037543596 | PGBD2       |
| ENSG00000227946 | -0.752377621 | 0.005025811 | 0.047007821 | AC007383.2  |
| ENSG00000198298 | -0.754585073 | 0.005412674 | 0.049519474 | ZNF485      |
| ENSG00000204611 | -0.756186289 | 8.21E-05    | 0.001966982 | ZNF616      |
| ENSG00000237190 | -0.756527512 | 0.004606989 | 0.044150368 | CDKN2AIPNL  |
| ENSG00000197062 | -0.758055493 | 0.000282913 | 0.005346291 | ZSCAN26     |
| ENSG00000197363 | -0.758349532 | 0.001777641 | 0.022170302 | ZNF517      |
| ENSG00000238105 | -0.75973097  | 0.00539368  | 0.049397965 | GOLGA2P5    |
| ENSG00000213380 | -0.761599518 | 0.000810306 | 0.01217383  | COG8        |
| ENSG00000169169 | -0.762032663 | 0.001201309 | 0.016623012 | CPT1C       |
| ENSG00000179941 | -0.762327813 | 0.000436209 | 0.007490326 | BBS10       |
| ENSG00000115282 | -0.76270095  | 0.001305124 | 0.017646039 | TTC31       |
| ENSG00000234616 | -0.763871985 | 0.000131856 | 0.002931572 | JRK         |
| ENSG00000144134 | -0.766761651 | 9.19E-05    | 0.002159019 | RABL2A      |
| ENSG00000167840 | -0.768020428 | 8.70E-06    | 0.000307442 | ZNF232      |
| ENSG00000173928 | -0.768687627 | 0.002133063 | 0.025469147 | SWSAP1      |
| ENSG00000213865 | -0.769775523 | 0.001294835 | 0.017561828 | C8orf44     |
| ENSG00000188227 | -0.770482386 | 0.002584507 | 0.029155488 | ZNF793      |
| ENSG00000250132 | -0.771013411 | 0.000701906 | 0.010853192 | AC004803.1  |

|                 |              |             |             |              |
|-----------------|--------------|-------------|-------------|--------------|
| ENSG00000125434 | -0.771795039 | 0.001544262 | 0.019914221 | SLC25A35     |
| ENSG00000140451 | -0.772849614 | 0.005210793 | 0.048285441 | PIF1         |
| ENSG00000167578 | -0.782248287 | 0.000246584 | 0.004819583 | RAB4B        |
| ENSG00000196345 | -0.785668484 | 0.000698704 | 0.010829489 | ZKSCAN7      |
| ENSG00000080293 | -0.785700678 | 0.004255324 | 0.041758181 | SCTR         |
| ENSG00000232434 | -0.790135078 | 0.004527538 | 0.043683864 | C9orf172     |
| ENSG00000230733 | -0.792620356 | 0.002341347 | 0.027388907 | AC092171.2   |
| ENSG00000264247 | -0.793487212 | 3.92E-08    | 2.84E-06    | LINC00909    |
| ENSG00000215883 | -0.794920454 | 0.000644694 | 0.010180915 | CYB5RL       |
| ENSG00000173917 | -0.796767002 | 0.000347617 | 0.006267739 | HOXB2        |
| ENSG00000257433 | -0.797377397 | 0.002055607 | 0.024795338 | AC004241.1   |
| ENSG00000076351 | -0.79910368  | 0.002299114 | 0.026967821 | SLC46A1      |
| ENSG00000269834 | -0.80217022  | 0.004024437 | 0.040191703 | ZNF528-AS1   |
| ENSG00000237945 | -0.803139565 | 0.003321095 | 0.035056605 | LINC00649    |
| ENSG00000242294 | -0.804986618 | 0.003537998 | 0.036572473 | STAG3L5P     |
| ENSG00000250571 | -0.805698032 | 0.000579584 | 0.009351916 | GLI4         |
| ENSG00000198182 | -0.806404929 | 0.001765096 | 0.022070935 | ZNF607       |
| ENSG00000247240 | -0.810571655 | 0.000288778 | 0.005417671 | UBL7-AS1     |
| ENSG00000272853 | -0.813540785 | 0.000752534 | 0.011458751 | AC069544.1   |
| ENSG00000120093 | -0.815290146 | 0.001286238 | 0.017463486 | HOXB3        |
| ENSG00000162063 | -0.816889609 | 0.001394299 | 0.018561563 | CCNF         |
| ENSG00000133561 | -0.817413506 | 6.11E-08    | 4.08E-06    | GIMAP6       |
| ENSG00000163154 | -0.818574653 | 0.000330291 | 0.006022303 | TNFAIP8L2    |
| ENSG00000247828 | -0.821354497 | 0.001017374 | 0.014583856 | TMEM161B-AS1 |
| ENSG00000162999 | -0.821859422 | 0.000163536 | 0.003492271 | DUSP19       |
| ENSG00000237840 | -0.821940616 | 0.002530353 | 0.028744545 | FAM21FP      |
| ENSG00000105383 | -0.822038197 | 0.000480643 | 0.008060195 | CD33         |
| ENSG00000131634 | -0.822393662 | 0.002138646 | 0.025488883 | TMEM204      |
| ENSG00000180257 | -0.825644523 | 0.000725081 | 0.011125346 | ZNF816       |
| ENSG00000175538 | -0.827259807 | 0.001464266 | 0.019158777 | KCNE3        |
| ENSG00000213139 | -0.829728319 | 0.000884127 | 0.013078428 | CRYGS        |
| ENSG00000216895 | -0.830846944 | 8.91E-07    | 4.20E-05    | AC009403.1   |
| ENSG00000258301 | -0.83297167  | 0.002226466 | 0.026270073 | VASH1-AS1    |
| ENSG00000145649 | -0.833774498 | 0.002726839 | 0.030349537 | GZMA         |
| ENSG00000196689 | -0.834049121 | 0.001015678 | 0.0145676   | TRPV1        |
| ENSG00000183734 | -0.835617054 | 0.002440009 | 0.028118318 | ASCL2        |
| ENSG00000261526 | -0.839380888 | 0.004380537 | 0.042664199 | AC012615.1   |
| ENSG00000187626 | -0.84119673  | 0.000257268 | 0.004981188 | ZKSCAN4      |
| ENSG00000196366 | -0.842074642 | 0.000231026 | 0.004599563 | C9orf163     |
| ENSG00000196458 | -0.843153968 | 0.001410982 | 0.018687766 | ZNF605       |
| ENSG00000167984 | -0.845648745 | 0.005069947 | 0.047352353 | NLRC3        |
| ENSG00000188171 | -0.847818419 | 0.0014567   | 0.019107953 | ZNF626       |
| ENSG00000099869 | -0.847883821 | 0.005076372 | 0.047368952 | IGF2-AS      |
| ENSG00000169598 | -0.848326065 | 1.10E-05    | 0.000372718 | DFFB         |
| ENSG00000185513 | -0.848736147 | 3.24E-05    | 0.000917631 | L3MBTL1      |
| ENSG00000235194 | -0.852537151 | 0.000271827 | 0.005205045 | PPP1R3E      |
| ENSG00000232593 | -0.853613548 | 0.004181321 | 0.041290895 | KANTR        |
| ENSG00000106560 | -0.858828198 | 0.000623968 | 0.009926319 | GIMAP2       |
| ENSG00000198185 | -0.859443905 | 0.001473143 | 0.019236118 | ZNF334       |
| ENSG00000234432 | -0.862846303 | 0.002283124 | 0.0268045   | AC092171.3   |
| ENSG00000117616 | -0.863514755 | 0.002384556 | 0.027741971 | RSRP1        |
| ENSG00000269486 | -0.866416875 | 0.003098998 | 0.03328088  | AC011455.2   |
| ENSG00000269044 | -0.866848828 | 0.000484345 | 0.008107627 | AC024075.2   |
| ENSG00000128482 | -0.866863519 | 0.00480364  | 0.045503923 | RNF112       |
| ENSG00000128000 | -0.867709896 | 0.0004764   | 0.008010799 | ZNF780B      |
| ENSG00000196670 | -0.868899783 | 0.000114847 | 0.002607009 | ZFP62        |
| ENSG00000260285 | -0.871455373 | 0.001053327 | 0.014999794 | AL133367.1   |
| ENSG00000133574 | -0.873740186 | 1.50E-06    | 6.60E-05    | GIMAP4       |
| ENSG00000004139 | -0.875585328 | 1.43E-05    | 0.000466795 | SARM1        |
| ENSG00000198133 | -0.878426131 | 0.000129833 | 0.002896514 | TMEM229B     |
| ENSG00000223705 | -0.8797792   | 0.000117904 | 0.002667079 | NSUN5P1      |
| ENSG00000258534 | -0.883370569 | 0.002621491 | 0.029460163 | AL132712.1   |
| ENSG00000133624 | -0.884735233 | 1.97E-05    | 0.000616257 | ZNF767P      |
| ENSG00000226752 | -0.887231963 | 0.000701283 | 0.010850029 | PSMD5-AS1    |
| ENSG00000198934 | -0.88846397  | 0.001125747 | 0.015779917 | MAGEE1       |
| ENSG00000283175 | -0.889188088 | 0.002716245 | 0.030286076 | AC007920.2   |
| ENSG00000261269 | -0.889932218 | 8.71E-06    | 0.000307442 | AC093278.2   |
| ENSG00000037757 | -0.890725089 | 3.01E-05    | 0.00086516  | MRI1         |
| ENSG00000177599 | -0.892308117 | 0.002802281 | 0.030992316 | ZNF491       |
| ENSG00000172123 | -0.893107793 | 0.000787164 | 0.01190889  | SLFN12       |

|                 |              |             |             |            |
|-----------------|--------------|-------------|-------------|------------|
| ENSG00000198105 | -0.893230602 | 0.000246411 | 0.004819583 | ZNF248     |
| ENSG00000262580 | -0.893790068 | 0.002727785 | 0.030349537 | AC087741.1 |
| ENSG00000258297 | -0.89435428  | 0.000118757 | 0.0026817   | AP001157.1 |
| ENSG00000181690 | -0.894379876 | 0.004156994 | 0.041135528 | PLAG1      |
| ENSG00000242600 | -0.894770424 | 0.000455132 | 0.007744666 | MBL1P      |
| ENSG00000245571 | -0.895110328 | 6.57E-05    | 0.001644461 | AP001258.1 |
| ENSG00000197124 | -0.897864302 | 0.000601783 | 0.009638189 | ZNF682     |
| ENSG00000137834 | -0.898276579 | 0.00084402  | 0.012598888 | SMAD6      |
| ENSG00000080947 | -0.898340622 | 0.000173989 | 0.003658281 | CROCCP3    |
| ENSG00000120784 | -0.89897992  | 0.000513973 | 0.008493981 | ZFP30      |
| ENSG00000166928 | -0.899493105 | 0.00400671  | 0.040060923 | MS4A14     |
| ENSG00000116205 | -0.901143084 | 0.000407768 | 0.007096423 | TCEANC2    |
| ENSG00000231711 | -0.901602633 | 0.000891416 | 0.013133832 | LINC00899  |
| ENSG00000230487 | -0.902533288 | 0.000109732 | 0.002512896 | PSMG3-AS1  |
| ENSG00000106479 | -0.903618103 | 0.001049137 | 0.014948331 | ZNF862     |
| ENSG00000240449 | -0.904619643 | 0.001468124 | 0.019189892 | AC005586.1 |
| ENSG00000120215 | -0.909863022 | 0.004165641 | 0.041189676 | MLANA      |
| ENSG00000104863 | -0.92041992  | 0.001168138 | 0.016233801 | LIN7B      |
| ENSG00000245849 | -0.920549162 | 0.000889389 | 0.013111417 | RAD51-AS1  |
| ENSG00000181631 | -0.921152405 | 0.003867369 | 0.038983195 | P2RY13     |
| ENSG00000261067 | -0.921156116 | 0.000692881 | 0.01076871  | AC109460.3 |
| ENSG00000115657 | -0.926057957 | 1.61E-06    | 7.03E-05    | ABCB6      |
| ENSG00000259877 | -0.926311667 | 0.001300256 | 0.017607745 | AC009113.1 |
| ENSG00000234618 | -0.927929864 | 0.002215834 | 0.026180347 | RPSAP9     |
| ENSG00000180539 | -0.929547929 | 0.002053747 | 0.024784423 | C9orf139   |
| ENSG00000204851 | -0.931337358 | 0.000432284 | 0.007432764 | PNMA8B     |
| ENSG00000153896 | -0.932471484 | 6.18E-07    | 3.05E-05    | ZNF599     |
| ENSG00000256771 | -0.933188921 | 0.000265373 | 0.005102592 | ZNF253     |
| ENSG00000224307 | -0.937568646 | 0.001341929 | 0.018021573 | AL161785.1 |
| ENSG00000171596 | -0.938233298 | 0.000451379 | 0.007699849 | NMUR1      |
| ENSG00000185670 | -0.940867678 | 0.000710516 | 0.010953678 | ZBTB3      |
| ENSG00000272145 | -0.943903266 | 0.004024209 | 0.040191703 | NFYC-AS1   |
| ENSG00000124587 | -0.945522329 | 0.004541332 | 0.043753951 | PEX6       |
| ENSG00000182685 | -0.946415585 | 0.005150817 | 0.047935117 | BRICD5     |
| ENSG00000186715 | -0.947166362 | 0.001335378 | 0.017961493 | MST1L      |
| ENSG00000230590 | -0.948294565 | 3.94E-05    | 0.001077156 | FTX        |
| ENSG00000234028 | -0.949899765 | 0.001297879 | 0.017593924 | AC062029.1 |
| ENSG00000100122 | -0.951873159 | 0.000791878 | 0.011959293 | CRYBB1     |
| ENSG00000160298 | -0.957102893 | 0.001061138 | 0.015102733 | C21orf58   |
| ENSG00000180884 | -0.958070218 | 9.02E-07    | 4.25E-05    | ZNF792     |
| ENSG00000175787 | -0.959798302 | 4.09E-06    | 0.000160429 | ZNF169     |
| ENSG00000121933 | -0.962429426 | 0.001349663 | 0.018106704 | TMIGD3     |
| ENSG00000246089 | -0.96293971  | 0.00038834  | 0.00681724  | AC016065.1 |
| ENSG00000251247 | -0.963026035 | 0.000278256 | 0.005285235 | ZNF345     |
| ENSG00000146192 | -0.964256334 | 3.95E-05    | 0.001078639 | FGD2       |
| ENSG00000268403 | -0.965419332 | 0.00156749  | 0.020163657 | AC132192.2 |
| ENSG00000229754 | -0.969098387 | 0.003943369 | 0.039626122 | XCXR2P1    |
| ENSG00000278267 | -0.972365306 | 0.003495934 | 0.036296718 | MIR6859-1  |
| ENSG00000244041 | -0.976553862 | 0.000104858 | 0.002424818 | LINC01011  |
| ENSG00000215068 | -0.978972302 | 0.002500743 | 0.028520562 | AC025171.2 |
| ENSG00000131400 | -0.986852918 | 0.002816768 | 0.031099518 | NAPSA      |
| ENSG00000102886 | -0.987561818 | 0.003051877 | 0.033020851 | GDPD3      |
| ENSG00000280120 | -0.995787653 | 0.004335476 | 0.042417626 | AC073857.1 |
| ENSG00000274925 | -0.999506684 | 0.000159874 | 0.003431    | AC008741.2 |
| ENSG00000139725 | -1.000377746 | 0.00436088  | 0.042504654 | RHOF       |
| ENSG00000266777 | -1.002402024 | 0.00358683  | 0.036915471 | AC090616.6 |
| ENSG00000237651 | -1.003443649 | 0.00089653  | 0.013179251 | C2orf74    |
| ENSG00000244701 | -1.005167956 | 0.000367449 | 0.006516631 | AC004918.1 |
| ENSG00000272356 | -1.005715028 | 0.000700388 | 0.01084911  | AL080317.3 |
| ENSG00000251359 | -1.007554536 | 0.000105945 | 0.002441244 | WWC2-AS2   |
| ENSG00000273899 | -1.009123941 | 6.62E-06    | 0.000243123 | NOL12      |
| ENSG00000279833 | -1.012535657 | 0.004576344 | 0.044009566 | AL031846.2 |
| ENSG00000108511 | -1.013307376 | 0.000691306 | 0.010753377 | HOXB6      |
| ENSG00000260778 | -1.019422069 | 3.11E-05    | 0.000886427 | AC009065.4 |
| ENSG00000214787 | -1.020033053 | 0.004308722 | 0.042202379 | MS4A4E     |
| ENSG00000280149 | -1.026019435 | 0.004402404 | 0.042828936 | AC004877.2 |
| ENSG00000235706 | -1.026132219 | 0.001146162 | 0.01601418  | DICER1-AS1 |
| ENSG00000204623 | -1.031480378 | 0.000532641 | 0.008752318 | ZNRD1ASP   |
| ENSG00000205866 | -1.032823541 | 0.000770382 | 0.011695926 | FAM99A     |
| ENSG00000170835 | -1.037186454 | 0.004210863 | 0.041494979 | CEL        |



|                 |              |             |             |               |
|-----------------|--------------|-------------|-------------|---------------|
| ENSG00000174600 | -1.039504367 | 8.97E-05    | 0.002117125 | CMKLR1        |
| ENSG00000082196 | -1.041519671 | 9.59E-06    | 0.000332509 | C1QTNF3       |
| ENSG00000269837 | -1.042678889 | 0.000109261 | 0.002508739 | IPO5P1        |
| ENSG00000267309 | -1.045127951 | 0.000364387 | 0.006502331 | AC092295.2    |
| ENSG00000182700 | -1.047395224 | 0.000156412 | 0.003373462 | IGIP          |
| ENSG00000259772 | -1.051917274 | 0.000718228 | 0.011039783 | AC012236.1    |
| ENSG00000164100 | -1.052627559 | 0.004898593 | 0.046201325 | NDST3         |
| ENSG00000139187 | -1.057103991 | 1.27E-05    | 0.00042437  | KLRG1         |
| ENSG00000205865 | -1.057109029 | 5.08E-05    | 0.001327807 | FAM99B        |
| ENSG00000186026 | -1.057518807 | 9.99E-05    | 0.002328841 | ZNF284        |
| ENSG00000149634 | -1.059636228 | 0.003065262 | 0.03307854  | SPATA25       |
| ENSG00000204822 | -1.060138841 | 5.70E-05    | 0.001466206 | MRPL53        |
| ENSG00000133256 | -1.061251132 | 0.000812994 | 0.012200076 | PDE6B         |
| ENSG00000181036 | -1.063682962 | 0.004947003 | 0.046511218 | FCRL6         |
| ENSG00000213967 | -1.067110645 | 0.005308149 | 0.048856056 | ZNF726        |
| ENSG00000214189 | -1.067554757 | 0.000448358 | 0.007659819 | ZNF788        |
| ENSG00000180061 | -1.072944833 | 9.66E-05    | 0.002257368 | TMEM150B      |
| ENSG00000175544 | -1.085123526 | 9.69E-06    | 0.000334646 | CABP4         |
| ENSG00000184601 | -1.08592422  | 0.000407705 | 0.007096423 | C14orf180     |
| ENSG00000249201 | -1.092781956 | 0.003956707 | 0.039744766 | CTD-3080P12.3 |
| ENSG00000232229 | -1.099447341 | 0.000796046 | 0.012015253 | LINC00865     |
| ENSG00000261556 | -1.10025531  | 0.00027321  | 0.005222546 | SMG1P7        |
| ENSG00000267152 | -1.101071269 | 0.000684248 | 0.010670996 | AC093227.1    |
| ENSG00000161640 | -1.101093728 | 0.000249126 | 0.00484544  | SIGLEC11      |
| ENSG00000121807 | -1.10266029  | 0.004745475 | 0.045084616 | CCR2          |
| ENSG00000280145 | -1.103604361 | 0.002399967 | 0.027862009 | CU638689.4    |
| ENSG00000187808 | -1.108288853 | 0.000248521 | 0.004840941 | SOWAHD        |
| ENSG00000110025 | -1.108564607 | 0.000437315 | 0.007504354 | SNX15         |
| ENSG00000227051 | -1.110626809 | 5.45E-07    | 2.72E-05    | C14orf132     |
| ENSG00000253686 | -1.110899881 | 0.000676498 | 0.010573745 | LINC01484     |
| ENSG00000236778 | -1.11095899  | 0.002574884 | 0.029084871 | INTS6-AS1     |
| ENSG00000260103 | -1.115241973 | 0.00250027  | 0.028520562 | AC012435.1    |
| ENSG00000173894 | -1.117755256 | 0.003418083 | 0.035688365 | CBX2          |
| ENSG00000213203 | -1.125757744 | 2.54E-05    | 0.000758816 | GIMAP1        |
| ENSG00000274292 | -1.125807093 | 0.00046648  | 0.007897085 | AC084018.2    |
| ENSG00000196172 | -1.132210078 | 0.001657123 | 0.02103508  | ZNF681        |
| ENSG00000205864 | -1.137982646 | 0.002427192 | 0.028014202 | KRTAP5-6      |
| ENSG00000161664 | -1.140255564 | 0.001913293 | 0.023438292 | ASB16         |
| ENSG00000232442 | -1.14241053  | 0.002326239 | 0.027260467 | MHENCN        |
| ENSG00000272692 | -1.149802813 | 0.003529148 | 0.036545592 | AC010997.4    |
| ENSG00000273373 | -1.152658459 | 0.000218541 | 0.004422988 | AL355488.2    |
| ENSG00000231345 | -1.157907013 | 0.002915573 | 0.031945717 | BEND3P1       |
| ENSG00000261474 | -1.162766318 | 0.000326313 | 0.00596233  | AC026471.4    |
| ENSG00000270012 | -1.163072868 | 0.000720383 | 0.01106635  | AC232271.1    |
| ENSG00000279452 | -1.163139937 | 0.000471032 | 0.007951455 | AC006277.1    |
| ENSG00000163794 | -1.164019184 | 0.002717831 | 0.030290745 | UCN           |
| ENSG00000273084 | -1.164345879 | 0.001100545 | 0.015535764 | AC092171.5    |
| ENSG00000162739 | -1.182021031 | 0.00048618  | 0.008127847 | SLAMF6        |
| ENSG00000226659 | -1.183051363 | 0.004689862 | 0.044720018 | AC021028.1    |
| ENSG00000267508 | -1.183763436 | 0.00489159  | 0.046168495 | ZNF285        |
| ENSG00000197935 | -1.186149456 | 0.001407244 | 0.018657311 | ZNF311        |
| ENSG00000240972 | -1.188920414 | 0.0026385   | 0.029610086 | MIF           |
| ENSG00000142065 | -1.192325688 | 0.0011514   | 0.016070048 | ZFP14         |
| ENSG00000146215 | -1.19257098  | 0.000921898 | 0.013460639 | CRIP3         |
| ENSG00000126882 | -1.214241385 | 5.14E-07    | 2.61E-05    | FAM78A        |
| ENSG00000276744 | -1.215761298 | 0.001134481 | 0.015869914 | AC105137.3    |
| ENSG00000166845 | -1.216286829 | 0.000471914 | 0.007961168 | C18orf54      |
| ENSG00000180626 | -1.216913363 | 2.29E-05    | 0.000704891 | ZNF594        |
| ENSG00000167968 | -1.218098695 | 0.002440548 | 0.028118318 | DNASE1L2      |
| ENSG00000179914 | -1.219713577 | 0.002680746 | 0.029967533 | ITLN1         |
| ENSG00000264176 | -1.220550755 | 0.003552733 | 0.036667051 | MAGOH2P       |
| ENSG00000124613 | -1.225000592 | 0.001228158 | 0.016878063 | ZNF391        |
| ENSG00000273253 | -1.22786913  | 0.000326113 | 0.00596233  | AL022328.4    |
| ENSG00000204872 | -1.228470852 | 0.002132264 | 0.025469147 | NAT8B         |
| ENSG00000245888 | -1.230807583 | 0.003028891 | 0.032840619 | FLJ21408      |
| ENSG00000271654 | -1.234119664 | 0.000466593 | 0.007897085 | AC025062.2    |
| ENSG00000212694 | -1.23647405  | 4.93E-06    | 0.000188775 | LINC01089     |
| ENSG00000260329 | -1.240248701 | 0.000115673 | 0.002621176 | AC007541.1    |
| ENSG00000185614 | -1.241681568 | 0.000366975 | 0.006512678 | FAM212A       |
| ENSG00000243238 | -1.245317388 | 0.001654339 | 0.021025741 | IGKV2-30      |

|                 |              |             |             |            |
|-----------------|--------------|-------------|-------------|------------|
| ENSG00000149050 | -1.249882762 | 0.001001641 | 0.014414079 | ZNF214     |
| ENSG00000180938 | -1.252506767 | 0.000120065 | 0.002704162 | ZNF572     |
| ENSG00000279518 | -1.255763497 | 0.000309814 | 0.005726819 | AC083843.3 |
| ENSG00000235997 | -1.265630386 | 0.004685857 | 0.044698253 | LINC01936  |
| ENSG00000274471 | -1.267989011 | 4.05E-07    | 2.14E-05    | AC242376.2 |
| ENSG00000123999 | -1.273831648 | 0.00218741  | 0.025962734 | INHA       |
| ENSG00000261326 | -1.27979712  | 8.97E-06    | 0.000316366 | LINC01355  |
| ENSG00000261707 | -1.280106805 | 0.003221339 | 0.034268497 | AC092134.1 |
| ENSG00000261879 | -1.281225485 | 0.000159872 | 0.003431    | AC087500.1 |
| ENSG00000271551 | -1.281571658 | 0.001774272 | 0.022142985 | AL355297.4 |
| ENSG00000163406 | -1.283898723 | 7.33E-05    | 0.001787975 | SLC15A2    |
| ENSG00000171115 | -1.285297743 | 1.93E-08    | 1.57E-06    | GIMAP8     |
| ENSG00000163126 | -1.289485973 | 0.00034192  | 0.006190833 | ANKRD23    |
| ENSG00000229719 | -1.291018734 | 3.12E-05    | 0.000886876 | MIR194-2HG |
| ENSG00000260572 | -1.292263787 | 0.000503349 | 0.008344976 | AC069224.1 |
| ENSG00000171657 | -1.292913568 | 0.003337062 | 0.035167921 | GPR82      |
| ENSG00000260293 | -1.29472233  | 0.002051551 | 0.024769448 | AC106820.4 |
| ENSG00000258168 | -1.305722487 | 0.000290873 | 0.005450401 | AC025569.1 |
| ENSG00000199753 | -1.306096431 | 0.000104819 | 0.002424818 | SNORD104   |
| ENSG00000228653 | -1.312325736 | 0.001008179 | 0.01450012  | HNRNPCP7   |
| ENSG00000277067 | -1.313203011 | 0.003801273 | 0.038534884 | CU634019.1 |
| ENSG00000284237 | -1.323109865 | 6.05E-05    | 0.001536753 | AL356275.1 |
| ENSG00000276256 | -1.324965357 | 0.00109188  | 0.015455499 | AC011043.1 |
| ENSG00000267102 | -1.3268238   | 0.003080441 | 0.033150174 | AC060766.1 |
| ENSG00000259108 | -1.327363086 | 0.005409905 | 0.049519474 | LINC01595  |
| ENSG00000248554 | -1.328095132 | 0.00251726  | 0.028665107 | AC114956.2 |
| ENSG00000139193 | -1.33275537  | 0.000952166 | 0.013840283 | CD27       |
| ENSG00000272849 | -1.33379329  | 0.000219956 | 0.004444687 | AC084018.1 |
| ENSG00000147138 | -1.335852697 | 0.005384357 | 0.049329986 | GPR174     |
| ENSG00000283341 | -1.337106699 | 8.95E-05    | 0.002116562 | AC068205.2 |
| ENSG00000130173 | -1.337313439 | 0.002424715 | 0.027998061 | ANGPTL8    |
| ENSG00000248429 | -1.338017878 | 0.000308731 | 0.005726819 | AC098679.1 |
| ENSG00000211666 | -1.338920739 | 0.005268389 | 0.048593542 | IGLV2-14   |
| ENSG00000271971 | -1.345505583 | 0.000281103 | 0.005319829 | AC120053.1 |
| ENSG00000161643 | -1.349562601 | 6.33E-06    | 0.000234686 | SIGLEC16   |
| ENSG00000273148 | -1.352202058 | 0.000183936 | 0.003833263 | AL035563.1 |
| ENSG00000239382 | -1.356042322 | 2.74E-09    | 2.69E-07    | ALKBH6     |
| ENSG00000166343 | -1.367404959 | 4.51E-07    | 2.34E-05    | MSS51      |
| ENSG00000274422 | -1.369317893 | 0.000130497 | 0.002908818 | AC245060.5 |
| ENSG00000253347 | -1.371612814 | 0.000888001 | 0.013098398 | AC040934.1 |
| ENSG00000203896 | -1.375880726 | 0.003969097 | 0.039853785 | LIME1      |
| ENSG00000226491 | -1.381627407 | 0.000575339 | 0.009321476 | FTOP1      |
| ENSG00000264075 | -1.383047045 | 0.001064745 | 0.015145762 | MIR4783    |
| ENSG00000257958 | -1.385019087 | 0.00334772  | 0.035209751 | AC008125.1 |
| ENSG00000102468 | -1.386593414 | 0.004442814 | 0.043141188 | HTR2A      |
| ENSG00000257808 | -1.38684869  | 0.003832837 | 0.038755601 | AC073573.1 |
| ENSG00000163141 | -1.395137008 | 0.002968331 | 0.032346201 | BNIPL      |
| ENSG00000273576 | -1.39924146  | 2.42E-08    | 1.91E-06    | AC009283.1 |
| ENSG00000221886 | -1.402424088 | 0.000126697 | 0.002833861 | ZBED8      |
| ENSG00000156509 | -1.404862592 | 0.004664025 | 0.044577365 | FBXO43     |
| ENSG00000213999 | -1.404948867 | 0.000346966 | 0.006264696 | MEF2B      |
| ENSG00000089012 | -1.406250678 | 0.000423636 | 0.007318007 | SIRPG      |
| ENSG00000132465 | -1.407255296 | 4.89E-06    | 0.000187345 | JCHAIN     |
| ENSG00000171659 | -1.40946853  | 5.69E-08    | 3.85E-06    | GPR34      |
| ENSG00000275371 | -1.41455868  | 0.005449651 | 0.049752513 | AC012645.4 |
| ENSG00000268947 | -1.414623543 | 0.000528254 | 0.008702279 | AC002128.1 |
| ENSG00000250365 | -1.414916863 | 0.000748935 | 0.011423797 | AL139353.2 |
| ENSG00000274220 | -1.424124929 | 4.13E-05    | 0.00111805  | AC009163.7 |
| ENSG00000165449 | -1.429822905 | 0.000747821 | 0.0114212   | SLC16A9    |
| ENSG00000266217 | -1.43032453  | 0.00030695  | 0.005704964 | CTSLP2     |
| ENSG00000264290 | -1.438791471 | 0.000531552 | 0.008745491 | AC104564.4 |
| ENSG00000275449 | -1.44039071  | 0.002162296 | 0.025704943 | MIR6859-3  |
| ENSG00000258451 | -1.442458305 | 8.37E-05    | 0.002000624 | AL163636.1 |
| ENSG00000263412 | -1.445255637 | 9.19E-05    | 0.002158659 | AC004477.1 |
| ENSG00000262877 | -1.458731417 | 0.000181037 | 0.003781963 | AC110285.2 |
| ENSG00000247950 | -1.460485389 | 0.002106757 | 0.025236342 | SEC24B-AS1 |
| ENSG00000275549 | -1.467995975 | 0.002730991 | 0.030372177 | STPG3-AS1  |
| ENSG00000267530 | -1.478124923 | 0.003015585 | 0.032737394 | LINC01836  |
| ENSG00000179144 | -1.478889465 | 2.69E-10    | 3.26E-08    | GIMAP7     |
| ENSG00000260773 | -1.483914042 | 0.002026949 | 0.02456386  | AC055855.2 |

|                 |              |             |             |             |
|-----------------|--------------|-------------|-------------|-------------|
| ENSG00000237886 | -1.513646603 | 6.39E-06    | 0.000235546 | NALT1       |
| ENSG00000259895 | -1.517427762 | 0.000934748 | 0.013625261 | AC106820.2  |
| ENSG00000125787 | -1.526927719 | 0.00484836  | 0.045860571 | GNRH2       |
| ENSG00000226751 | -1.529695307 | 0.003447405 | 0.035965574 | AF127936.1  |
| ENSG00000271784 | -1.534637418 | 8.90E-05    | 0.002108042 | AL031055.1  |
| ENSG00000261192 | -1.536285113 | 0.002413123 | 0.027901462 | RNF126P1    |
| ENSG00000280399 | -1.544519182 | 0.001267553 | 0.017291235 | AC022497.1  |
| ENSG00000184619 | -1.551294814 | 0.003770188 | 0.038316216 | KRBA2       |
| ENSG00000211653 | -1.554152345 | 0.00053761  | 0.008806082 | IGLV1-40    |
| ENSG00000211943 | -1.560357149 | 0.001178863 | 0.016365313 | IGHV3-15    |
| ENSG00000224713 | -1.561821501 | 0.001909531 | 0.023417607 | AC025165.1  |
| ENSG00000236754 | -1.566496407 | 0.000150624 | 0.003286875 | AC007666.1  |
| ENSG00000199038 | -1.574098312 | 0.003715417 | 0.037893164 | MIR210      |
| ENSG00000205929 | -1.582084004 | 0.004608813 | 0.044150368 | C21orf62    |
| ENSG00000137078 | -1.593593183 | 6.63E-05    | 0.001651695 | SIT1        |
| ENSG00000271576 | -1.601947342 | 1.58E-06    | 6.95E-05    | AL359504.2  |
| ENSG00000268297 | -1.604974236 | 2.57E-05    | 0.000767195 | CLEC4GP1    |
| ENSG00000224689 | -1.615514636 | 0.004987507 | 0.046801392 | ZNF812P     |
| ENSG00000236617 | -1.6162157   | 0.004468041 | 0.043280058 | AC127070.2  |
| ENSG00000269086 | -1.618164176 | 0.00169897  | 0.021429989 | AC008555.2  |
| ENSG00000249669 | -1.618295332 | 0.000194606 | 0.00401053  | CARMN       |
| ENSG00000223749 | -1.625130709 | 4.51E-06    | 0.000174338 | MIR503HG    |
| ENSG00000180139 | -1.62681846  | 0.004090015 | 0.04065882  | ACTA2-AS1   |
| ENSG00000271662 | -1.627130654 | 0.003483719 | 0.036256946 | AC233280.2  |
| ENSG00000278367 | -1.635459225 | 0.004609703 | 0.044150368 | AL356652.1  |
| ENSG00000240382 | -1.639847706 | 0.003413886 | 0.035667667 | IGKV1-17    |
| ENSG00000272040 | -1.642426806 | 0.000292774 | 0.005472849 | AC010245.2  |
| ENSG00000230910 | -1.643384374 | 0.001099273 | 0.015526254 | AL391807.1  |
| ENSG00000262692 | -1.654191761 | 0.000108816 | 0.002500742 | AC116914.2  |
| ENSG00000230006 | -1.654542745 | 0.002457727 | 0.028205678 | ANKRD36BP2  |
| ENSG00000272983 | -1.657769524 | 0.004852559 | 0.045883561 | AL117339.4  |
| ENSG00000274929 | -1.659997805 | 0.002962782 | 0.032340068 | AL157813.1  |
| ENSG00000278690 | -1.663543495 | 0.003369499 | 0.035366108 | AC244100.4  |
| ENSG00000236417 | -1.676315682 | 0.00028607  | 0.005386346 | CTSLP1      |
| ENSG00000263884 | -1.690686542 | 0.000119588 | 0.002698103 | AP000845.1  |
| ENSG00000211660 | -1.692939822 | 0.000502642 | 0.008338581 | IGLV2-23    |
| ENSG00000168229 | -1.694739417 | 0.000379856 | 0.006690931 | PTGDR       |
| ENSG00000266973 | -1.701893043 | 0.001101895 | 0.015546359 | AC092296.1  |
| ENSG00000267543 | -1.703784414 | 0.002621979 | 0.029460163 | AC015802.3  |
| ENSG00000188681 | -1.706339954 | 0.002830334 | 0.03122272  | TEKT4P2     |
| ENSG00000236305 | -1.708599001 | 0.001862497 | 0.023015023 | SLC12A9-AS1 |
| ENSG00000279278 | -1.716620983 | 9.45E-06    | 0.000329234 | AC245060.6  |
| ENSG00000141028 | -1.724150723 | 0.001698014 | 0.021428347 | CDRT15P1    |
| ENSG00000264177 | -1.726938718 | 0.005377064 | 0.049292647 | AL353997.2  |
| ENSG00000237494 | -1.729805833 | 0.001000733 | 0.014408994 | AL360007.1  |
| ENSG00000171217 | -1.734779808 | 0.004538637 | 0.043744232 | CLDN2       |
| ENSG00000259349 | -1.738682467 | 0.002339747 | 0.027382531 | AC011921.1  |
| ENSG00000224358 | -1.74979625  | 0.003775965 | 0.038359899 | AL451074.2  |
| ENSG00000139445 | -1.75871618  | 0.001725844 | 0.021695126 | FOXN4       |
| ENSG00000267391 | -1.759109574 | 6.37E-06    | 0.000235546 | AC105105.2  |
| ENSG00000273473 | -1.765130604 | 0.003081717 | 0.033150174 | BX649601.1  |
| ENSG00000226777 | -1.765849917 | 2.39E-05    | 0.000728346 | FAM30A      |
| ENSG00000272525 | -1.774668465 | 0.000139941 | 0.003090143 | AC099522.2  |
| ENSG00000276409 | -1.780463768 | 3.13E-07    | 1.70E-05    | CCL14       |
| ENSG00000272970 | -1.782230519 | 0.005154235 | 0.047949727 | AC107294.2  |
| ENSG00000283991 | -1.785911343 | 0.003015395 | 0.032737394 | AC017000.1  |
| ENSG00000256124 | -1.788699955 | 0.000871686 | 0.012953479 | LINC01152   |
| ENSG00000235241 | -1.806391327 | 5.84E-05    | 0.001495064 | BX284668.4  |
| ENSG00000257989 | -1.812004466 | 0.004196942 | 0.041388769 | AC078864.1  |
| ENSG00000280129 | -1.831691309 | 0.001085856 | 0.015387011 | AL132780.5  |
| ENSG00000258273 | -1.832885069 | 0.000679859 | 0.010614904 | AC024257.2  |
| ENSG00000261366 | -1.840342747 | 0.001160318 | 0.016168428 | MANEA-AS1   |
| ENSG00000260362 | -1.843471468 | 0.003884745 | 0.039112769 | AC007218.1  |
| ENSG00000232283 | -1.850962235 | 0.001105661 | 0.015582548 | HSD17B3-AS1 |
| ENSG00000239839 | -1.872651147 | 0.00107469  | 0.01525378  | DEFA3       |
| ENSG00000282608 | -1.87738986  | 0.000104216 | 0.002416441 | ADORA3      |
| ENSG00000270550 | -1.879444334 | 0.004805535 | 0.04550526  | IGHV3-30    |
| ENSG00000252412 | -1.902179047 | 0.001896971 | 0.0233154   | Y_RNA       |
| ENSG00000272170 | -1.91298389  | 0.004155705 | 0.041135528 | AL355385.1  |
| ENSG00000230778 | -1.925502869 | 0.000221882 | 0.00447664  | ANKRD63     |

|                 |              |             |             |            |
|-----------------|--------------|-------------|-------------|------------|
| ENSG00000260296 | -1.93201531  | 3.85E-05    | 0.001055892 | AC095057.3 |
| ENSG00000005381 | -1.957156504 | 2.51E-05    | 0.000752615 | MPO        |
| ENSG00000236763 | -1.972921385 | 0.000417431 | 0.007234918 | TRMT112P4  |
| ENSG00000239571 | -1.986114449 | 0.004614147 | 0.044176627 | IGKV2D-30  |
| ENSG00000225891 | -2.028024453 | 0.002001979 | 0.024329434 | AL513365.2 |
| ENSG00000228639 | -2.054038299 | 0.005216966 | 0.048301289 | LINC02095  |
| ENSG00000211598 | -2.069829893 | 1.13E-06    | 5.20E-05    | IGKV4-1    |
| ENSG00000237484 | -2.084646717 | 0.005173287 | 0.048006477 | LINC01684  |
| ENSG00000048462 | -2.086103708 | 0.002465421 | 0.028256528 | TNFRSF17   |
| ENSG00000225698 | -2.089945719 | 0.005156501 | 0.04795361  | IGHV3-72   |
| ENSG00000270605 | -2.101889767 | 1.45E-05    | 0.000472207 | AL353622.1 |
| ENSG00000272719 | -2.121299339 | 0.000534935 | 0.008778892 | AC006483.2 |
| ENSG00000269681 | -2.136998784 | 0.001864549 | 0.023015023 | AC063977.7 |
| ENSG00000266274 | -2.137382678 | 0.000172975 | 0.003639902 | RN7SL138P  |
| ENSG00000269974 | -2.150174024 | 0.003778555 | 0.038371191 | AC091057.3 |
| ENSG00000272953 | -2.152108301 | 7.32E-09    | 6.50E-07    | AC02171.4  |
| ENSG00000197705 | -2.269318706 | 0.001834664 | 0.022743528 | KLHL14     |
| ENSG00000283312 | -2.302719473 | 0.004945877 | 0.046511218 | AC017104.4 |
| ENSG00000144407 | -2.318417966 | 0.001490931 | 0.019419531 | PTH2R      |
| ENSG00000271993 | -2.324649102 | 0.002964803 | 0.032346187 | AC126118.1 |
| ENSG00000279561 | -2.350444129 | 0.002454966 | 0.028197629 | AL845472.1 |
| ENSG00000267370 | -2.353839557 | 7.91E-06    | 0.000282853 | AC008752.3 |
| ENSG00000272128 | -2.367617028 | 0.002406428 | 0.027862009 | AP006545.2 |
| ENSG00000196415 | -2.381220584 | 7.71E-05    | 0.001869013 | PRTN3      |
| ENSG00000218631 | -2.425309575 | 0.003996003 | 0.039993491 | AL117344.1 |
| ENSG00000267895 | -2.461418912 | 0.001102611 | 0.01554801  | AC063977.1 |
| ENSG00000275580 | -2.478661098 | 0.000227773 | 0.004567085 | AC022306.2 |
| ENSG00000258654 | -2.490335301 | 0.000468284 | 0.007915372 | AC026495.1 |
| ENSG00000265046 | -2.560231226 | 0.001916927 | 0.023471729 | AC004253.2 |
| ENSG00000206047 | -2.61106198  | 0.003244213 | 0.03444122  | DEFA1      |
| ENSG00000270933 | -2.616050966 | 1.85E-09    | 1.87E-07    | AC010719.1 |
| ENSG00000225972 | -2.618351414 | 0.001084419 | 0.015383452 | MTND1P23   |
| ENSG00000260476 | -2.623507215 | 0.00276057  | 0.030596224 | AC104794.3 |
| ENSG00000213876 | -2.687251575 | 0.001640048 | 0.020869387 | AC120057.1 |
| ENSG00000278212 | -2.713364015 | 0.000693122 | 0.01076871  | AC134878.2 |
| ENSG00000227210 | -2.748098162 | 0.000179354 | 0.003752845 | AC079145.1 |
| ENSG00000262319 | -2.886119256 | 0.00219241  | 0.026001157 | AC007952.6 |
| ENSG00000279926 | -2.919556184 | 7.48E-07    | 3.65E-05    | AL138831.3 |
| ENSG00000274444 | -2.936275148 | 0.001095432 | 0.015488868 | AC078909.2 |
| ENSG00000169627 | -2.991644402 | 4.67E-05    | 0.001233865 | BOLA2B     |
| ENSG00000271259 | -3.00695573  | 0.000582694 | 0.009390428 | AC010201.1 |
| ENSG00000280057 | -3.069361634 | 3.11E-05    | 0.000886427 | AL022069.2 |
| ENSG00000260949 | -3.122174262 | 0.000129649 | 0.002894906 | AP006545.1 |
| ENSG00000211942 | -3.250873246 | 0.00516485  | 0.047979659 | IGHV3-13   |
| ENSG00000164821 | -3.658229011 | 8.32E-07    | 3.99E-05    | DEFA4      |

**Table 8. *TNIP3* and the AST levels of patients in 14 pairs of bulk RNA-seq samples.**

| Samples | EP <i>TNIP3</i> level | PR <i>TNIP3</i> level | Fold change | peak AST (U/L) | Group |
|---------|-----------------------|-----------------------|-------------|----------------|-------|
| 1       | 0.038302044           | 0.131689084           | 3.438173808 | 3428           | Low   |
| 2       | 0.113352733           | 0.12748214            | 1.124649901 | 1900           | Low   |
| 3       | 0.069499956           | 0.041258365           | 0.593645924 | 2218           | Low   |
| 4       | 0.069954428           | 0.47702207            | 6.819040383 | 765            | High  |
| 5       | 0.028241698           | 0.222543886           | 7.879975356 | 1779           | High  |
| 6       | 0.016308596           | 1.400345129           | 85.86546134 | 1133           | High  |
| 7       | 0.025045605           | 0.029457              | 1.176134505 | 3531           | Low   |
| 8       | 0.020632536           | 0.902089562           | 43.72170102 | 723            | High  |
| 9       | 0.01                  | 3.221400473           | 322.1400473 | 249            | High  |
| 10      | 0.023946643           | 0.08191076            | 3.420552903 | 1762           | Low   |
| 11      | 0.079317862           | 0.077060498           | 0.971540289 | 1285           | Low   |
| 12      | 0.01                  | 1.338119331           | 133.8119331 | 629            | High  |
| 13      | 0.056009758           | 0.011532451           | 0.205900741 | 3420           | Low   |
| 14      | 0.01                  | 0.048186575           | 4.818657524 | 25083          | NA    |

\*The 14th case was ruled out because of abnormally elevated liver enzymes due to surgical factors.

**Table 9. *TNIP3* and the AST levels of patients in 16 pairs of RT-PCR samples.**

| Samples | Fold change | peak AST (U/L) | Group |
|---------|-------------|----------------|-------|
| 1       | 11.44640844 | 175            | High  |
| 2       | 0.325454491 | 6728           | Low   |
| 3       | 0.628155114 | 3688           | Low   |
| 4       | 0.829332649 | 2297           | Low   |
| 5       | 1.548178658 | 2706           | High  |
| 6       | 1.100558702 | 1268           | Low   |
| 7       | 0.485854499 | 4036           | Low   |
| 8       | 0.007269502 | 2573           | Low   |
| 9       | 4.776011905 | 2371           | High  |
| 10      | 8.542385488 | 1956           | High  |
| 11      | 3.008172551 | 1067           | High  |
| 12      | 8.45064661  | 876            | High  |
| 13      | 0.325454491 | 3843           | Low   |
| 14      | 2.972042519 | 776            | High  |
| 15      | 0.238625327 | 1298           | Low   |
| 16      | 1.430437287 | 603            | High  |

**Table 10. List of markers information for endothelial cell clusters, related to Figure 4.**

|    | p_val     | avg_logFC   | pct.1 | pct.2 | p_val_adj | gene     | cluster | cell_type |
|----|-----------|-------------|-------|-------|-----------|----------|---------|-----------|
| 1  | 1.50E-102 | 1.063009685 | 0.997 | 0.767 | 3.26E-98  | CTSL     | 1       | CTSL_LSEC |
| 2  | 1.37E-105 | 0.996884506 | 0.992 | 0.469 | 2.98E-101 | CLEC4M   | 1       | CTSL_LSEC |
| 3  | 1.97E-80  | 0.961381669 | 0.911 | 0.386 | 4.29E-76  | CCL23    | 1       | CTSL_LSEC |
| 4  | 9.69E-85  | 0.94009916  | 0.962 | 0.437 | 2.11E-80  | CD14     | 1       | CTSL_LSEC |
| 5  | 6.41E-100 | 0.924854064 | 0.997 | 0.535 | 1.40E-95  | FCGR2B   | 1       | CTSL_LSEC |
| 6  | 2.93E-93  | 0.887400435 | 1     | 0.533 | 6.39E-89  | MS4A6A   | 1       | CTSL_LSEC |
| 7  | 2.40E-97  | 0.869592606 | 0.98  | 0.434 | 5.24E-93  | LYVE1    | 1       | CTSL_LSEC |
| 8  | 9.10E-92  | 0.857127552 | 1     | 0.603 | 1.99E-87  | FCN2     | 1       | CTSL_LSEC |
| 9  | 1.06E-90  | 0.847530387 | 1     | 0.553 | 2.31E-86  | CLEC4G   | 1       | CTSL_LSEC |
| 10 | 5.76E-91  | 0.83368593  | 1     | 0.55  | 1.26E-86  | OIT3     | 1       | CTSL_LSEC |
| 11 | 3.49E-87  | 0.81669904  | 0.997 | 0.639 | 7.61E-83  | ACP5     | 1       | CTSL_LSEC |
| 12 | 1.62E-80  | 0.813461424 | 0.992 | 0.697 | 3.54E-76  | LGMN     | 1       | CTSL_LSEC |
| 13 | 1.54E-91  | 0.794357372 | 1     | 0.848 | 3.36E-87  | SEPP1    | 1       | CTSL_LSEC |
| 14 | 2.45E-88  | 0.78315668  | 1     | 0.771 | 5.33E-84  | CTSD     | 1       | CTSL_LSEC |
| 15 | 8.34E-90  | 0.765665331 | 0.995 | 0.531 | 1.82E-85  | CD4      | 1       | CTSL_LSEC |
| 16 | 1.97E-79  | 0.760095263 | 0.997 | 0.504 | 4.29E-75  | CLEC1B   | 1       | CTSL_LSEC |
| 17 | 1.34E-84  | 0.724142775 | 1     | 0.776 | 2.92E-80  | DNASE1L3 | 1       | CTSL_LSEC |
| 18 | 6.27E-91  | 0.721654124 | 0.906 | 0.288 | 1.37E-86  | RELN     | 1       | CTSL_LSEC |
| 19 | 8.05E-67  | 0.704324009 | 1     | 0.764 | 1.76E-62  | FCN3     | 1       | CTSL_LSEC |
| 20 | 5.80E-73  | 0.679093202 | 0.987 | 0.623 | 1.26E-68  | MRC1     | 1       | CTSL_LSEC |
| 21 | 9.22E-79  | 0.670275752 | 0.791 | 0.24  | 2.01E-74  | PASK     | 1       | CTSL_LSEC |
| 22 | 2.71E-71  | 0.665617208 | 0.98  | 0.615 | 5.91E-67  | P4HB     | 1       | CTSL_LSEC |
| 23 | 1.38E-75  | 0.664393909 | 0.98  | 0.5   | 3.01E-71  | CXCL16   | 1       | CTSL_LSEC |
| 24 | 4.25E-68  | 0.607247454 | 0.867 | 0.345 | 9.26E-64  | CFP      | 1       | CTSL_LSEC |
| 25 | 4.22E-67  | 0.606028923 | 0.901 | 0.41  | 9.19E-63  | NID1     | 1       | CTSL_LSEC |
| 26 | 1.46E-59  | 0.5941154   | 1     | 0.79  | 3.18E-55  | CALR     | 1       | CTSL_LSEC |
| 27 | 7.40E-61  | 0.587132965 | 0.865 | 0.35  | 1.61E-56  | EHD3     | 1       | CTSL_LSEC |
| 28 | 1.66E-47  | 0.57997727  | 0.941 | 0.568 | 3.62E-43  | ADM      | 1       | CTSL_LSEC |
| 29 | 5.16E-57  | 0.577270497 | 0.987 | 0.661 | 1.12E-52  | PDIA6    | 1       | CTSL_LSEC |
| 30 | 3.90E-49  | 0.577248153 | 0.995 | 0.856 | 8.50E-45  | HSP90B1  | 1       | CTSL_LSEC |
| 31 | 3.05E-57  | 0.550442355 | 0.972 | 0.597 | 6.65E-53  | ASAH1    | 1       | CTSL_LSEC |
| 32 | 1.51E-55  | 0.537461716 | 0.946 | 0.504 | 3.30E-51  | COTL1    | 1       | CTSL_LSEC |
| 33 | 2.42E-67  | 0.537172278 | 0.801 | 0.284 | 5.28E-63  | PXDN     | 1       | CTSL_LSEC |
| 34 | 1.72E-38  | 0.524547719 | 0.992 | 0.732 | 3.75E-34  | CRHBP    | 1       | CTSL_LSEC |
| 35 | 2.18E-63  | 0.520455597 | 0.936 | 0.401 | 4.76E-59  | STAB2    | 1       | CTSL_LSEC |
| 36 | 1.58E-52  | 0.519384199 | 0.872 | 0.415 | 3.45E-48  | SEMA6A   | 1       | CTSL_LSEC |
| 37 | 2.41E-50  | 0.514372706 | 0.941 | 0.55  | 5.25E-46  | JAK1     | 1       | CTSL_LSEC |
| 38 | 2.77E-21  | 0.513135856 | 0.931 | 0.666 | 6.04E-17  | HSPA5    | 1       | CTSL_LSEC |
| 39 | 3.05E-76  | 0.508755482 | 0.594 | 0.125 | 6.66E-72  | DHCR24   | 1       | CTSL_LSEC |
| 40 | 6.24E-46  | 0.503960023 | 0.987 | 0.696 | 1.36E-41  | PRCP     | 1       | CTSL_LSEC |
| 41 | 2.02E-60  | 0.501237504 | 0.773 | 0.277 | 4.41E-56  | TMEM37   | 1       | CTSL_LSEC |
| 42 | 2.31E-48  | 0.497466205 | 0.931 | 0.515 | 5.03E-44  | SLC40A1  | 1       | CTSL_LSEC |
| 43 | 5.65E-50  | 0.49260805  | 0.941 | 0.535 | 1.23E-45  | CTSA     | 1       | CTSL_LSEC |
| 44 | 1.90E-45  | 0.492139475 | 0.908 | 0.475 | 4.15E-41  | KDR      | 1       | CTSL_LSEC |
| 45 | 8.32E-52  | 0.489249927 | 0.997 | 0.755 | 1.81E-47  | PSAP     | 1       | CTSL_LSEC |
| 46 | 4.81E-51  | 0.486068253 | 0.926 | 0.494 | 1.05E-46  | SNX5     | 1       | CTSL_LSEC |
| 47 | 5.73E-75  | 0.484115076 | 0.724 | 0.191 | 1.25E-70  | NPL      | 1       | CTSL_LSEC |
| 48 | 4.45E-44  | 0.476712086 | 0.982 | 0.694 | 9.71E-40  | PDIA3    | 1       | CTSL_LSEC |
| 49 | 3.87E-49  | 0.473659925 | 1     | 0.812 | 8.44E-45  | RAMP3    | 1       | CTSL_LSEC |
| 50 | 5.51E-44  | 0.469431856 | 0.954 | 0.528 | 1.20E-39  | F2R      | 1       | CTSL_LSEC |
| 51 | 5.25E-41  | 0.468943866 | 0.888 | 0.468 | 1.15E-36  | MMRN1    | 1       | CTSL_LSEC |
| 52 | 3.75E-45  | 0.451102281 | 0.875 | 0.447 | 8.17E-41  | CALU     | 1       | CTSL_LSEC |
| 53 | 2.04E-71  | 0.449842328 | 0.531 | 0.101 | 4.45E-67  | ECM1     | 1       | CTSL_LSEC |
| 54 | 4.30E-32  | 0.443391258 | 0.849 | 0.48  | 9.38E-28  | PLIN2    | 1       | CTSL_LSEC |
| 55 | 1.83E-42  | 0.439599492 | 0.969 | 0.656 | 3.99E-38  | CTSB     | 1       | CTSL_LSEC |
| 56 | 2.10E-49  | 0.438998377 | 0.844 | 0.404 | 4.58E-45  | SNX2     | 1       | CTSL_LSEC |
| 57 | 3.03E-33  | 0.428918752 | 0.987 | 0.766 | 6.61E-29  | SDPR     | 1       | CTSL_LSEC |
| 58 | 3.63E-48  | 0.427339113 | 0.416 | 0.092 | 7.92E-44  | MS4A4A   | 1       | CTSL_LSEC |
| 59 | 2.57E-47  | 0.425761666 | 0.709 | 0.267 | 5.61E-43  | ANPEP    | 1       | CTSL_LSEC |
| 60 | 3.71E-44  | 0.422995641 | 0.61  | 0.215 | 8.09E-40  | SLC27A3  | 1       | CTSL_LSEC |
| 61 | 5.52E-43  | 0.419311013 | 0.99  | 0.825 | 1.20E-38  | FCGRT    | 1       | CTSL_LSEC |
| 62 | 1.19E-38  | 0.418240374 | 0.834 | 0.418 | 2.60E-34  | YES1     | 1       | CTSL_LSEC |
| 63 | 1.56E-48  | 0.415606566 | 0.523 | 0.154 | 3.41E-44  | MAP7D3   | 1       | CTSL_LSEC |
| 64 | 3.72E-35  | 0.409876244 | 0.895 | 0.482 | 8.10E-31  | CD36     | 1       | CTSL_LSEC |
| 65 | 1.46E-39  | 0.408155333 | 0.982 | 0.677 | 3.18E-35  | GRN      | 1       | CTSL_LSEC |
| 66 | 9.31E-40  | 0.407045245 | 0.651 | 0.26  | 2.03E-35  | CBLB     | 1       | CTSL_LSEC |
| 67 | 1.51E-42  | 0.406886768 | 0.837 | 0.389 | 3.30E-38  | DAB2     | 1       | CTSL_LSEC |
| 68 | 4.98E-40  | 0.403176108 | 0.64  | 0.243 | 1.09E-35  | PHLDA1   | 1       | CTSL_LSEC |

|     |          |             |       |       |          |          |   |           |
|-----|----------|-------------|-------|-------|----------|----------|---|-----------|
| 69  | 7.63E-64 | 0.398958427 | 0.388 | 0.055 | 1.66E-59 | LILRB5   | 1 | CTSL_LSEC |
| 70  | 3.02E-36 | 0.398934218 | 0.931 | 0.577 | 6.60E-32 | LAMP1    | 1 | CTSL_LSEC |
| 71  | 1.02E-39 | 0.39819838  | 0.804 | 0.397 | 2.23E-35 | NRP2     | 1 | CTSL_LSEC |
| 72  | 6.22E-54 | 0.398110425 | 1     | 0.944 | 1.36E-49 | HLA-E    | 1 | CTSL_LSEC |
| 73  | 1.04E-74 | 0.397984153 | 0.454 | 0.064 | 2.27E-70 | SLC18A2  | 1 | CTSL_LSEC |
| 74  | 3.10E-31 | 0.394298016 | 0.934 | 0.622 | 6.76E-27 | ADGRL4   | 1 | CTSL_LSEC |
| 75  | 3.03E-41 | 0.393604241 | 0.566 | 0.203 | 6.61E-37 | SH3TC1   | 1 | CTSL_LSEC |
| 76  | 5.27E-34 | 0.388442758 | 0.918 | 0.571 | 1.15E-29 | CANX     | 1 | CTSL_LSEC |
| 77  | 4.05E-40 | 0.386783071 | 0.658 | 0.263 | 8.84E-36 | TSN      | 1 | CTSL_LSEC |
| 78  | 1.14E-37 | 0.386192996 | 0.732 | 0.326 | 2.49E-33 | GIMAP5   | 1 | CTSL_LSEC |
| 79  | 1.13E-55 | 0.384532055 | 0.987 | 0.576 | 2.46E-51 | STAB1    | 1 | CTSL_LSEC |
| 80  | 3.21E-47 | 0.384330752 | 0.622 | 0.205 | 7.01E-43 | ITGA1    | 1 | CTSL_LSEC |
| 81  | 2.52E-55 | 0.379290707 | 0.388 | 0.066 | 5.50E-51 | MRO      | 1 | CTSL_LSEC |
| 82  | 1.39E-25 | 0.3791075   | 0.967 | 0.726 | 3.04E-21 | SGK1     | 1 | CTSL_LSEC |
| 83  | 4.44E-44 | 0.378660277 | 0.702 | 0.277 | 9.69E-40 | CREG1    | 1 | CTSL_LSEC |
| 84  | 1.24E-40 | 0.378505864 | 0.824 | 0.382 | 2.70E-36 | TPP1     | 1 | CTSL_LSEC |
| 85  | 1.73E-53 | 0.377049396 | 0.561 | 0.153 | 3.77E-49 | P3H2     | 1 | CTSL_LSEC |
| 86  | 3.13E-52 | 0.376511599 | 0.571 | 0.162 | 6.84E-48 | RBM47    | 1 | CTSL_LSEC |
| 87  | 2.44E-32 | 0.376059722 | 0.959 | 0.645 | 5.31E-28 | TMEM123  | 1 | CTSL_LSEC |
| 88  | 9.41E-28 | 0.374682949 | 0.814 | 0.448 | 2.05E-23 | UGCG     | 1 | CTSL_LSEC |
| 89  | 2.02E-28 | 0.368669602 | 0.913 | 0.619 | 4.41E-24 | LPAR6    | 1 | CTSL_LSEC |
| 90  | 1.63E-32 | 0.367612805 | 0.827 | 0.418 | 3.55E-28 | DENND4C  | 1 | CTSL_LSEC |
| 91  | 1.08E-35 | 0.366938216 | 0.997 | 0.878 | 2.35E-31 | APP      | 1 | CTSL_LSEC |
| 92  | 1.80E-39 | 0.365705028 | 0.709 | 0.29  | 3.92E-35 | MYO10    | 1 | CTSL_LSEC |
| 93  | 9.77E-34 | 0.364732771 | 0.834 | 0.418 | 2.13E-29 | TM4SF18  | 1 | CTSL_LSEC |
| 94  | 8.95E-31 | 0.362383674 | 0.702 | 0.349 | 1.95E-26 | PDIA4    | 1 | CTSL_LSEC |
| 95  | 4.95E-39 | 0.36140825  | 0.992 | 0.769 | 1.08E-34 | SPARC    | 1 | CTSL_LSEC |
| 96  | 8.31E-33 | 0.361287862 | 0.709 | 0.329 | 1.81E-28 | EPOR     | 1 | CTSL_LSEC |
| 97  | 3.60E-47 | 0.36069139  | 0.592 | 0.191 | 7.86E-43 | CD82     | 1 | CTSL_LSEC |
| 98  | 5.45E-34 | 0.358774165 | 0.77  | 0.385 | 1.19E-29 | TMEM2    | 1 | CTSL_LSEC |
| 99  | 1.43E-32 | 0.358635808 | 0.967 | 0.646 | 3.11E-28 | PPFIBP1  | 1 | CTSL_LSEC |
| 100 | 2.08E-38 | 0.356883106 | 0.712 | 0.32  | 4.53E-34 | FHL1     | 1 | CTSL_LSEC |
| 101 | 1.52E-25 | 0.356543656 | 0.98  | 0.663 | 3.32E-21 | AKAP12   | 1 | CTSL_LSEC |
| 102 | 3.26E-32 | 0.356505357 | 0.929 | 0.545 | 7.10E-28 | NTN4     | 1 | CTSL_LSEC |
| 103 | 2.48E-33 | 0.355571091 | 0.663 | 0.293 | 5.40E-29 | SLC35A1  | 1 | CTSL_LSEC |
| 104 | 2.23E-39 | 0.35435107  | 0.531 | 0.18  | 4.87E-35 | CHID1    | 1 | CTSL_LSEC |
| 105 | 1.46E-24 | 0.353676933 | 0.977 | 0.724 | 3.18E-20 | SARAF    | 1 | CTSL_LSEC |
| 106 | 2.95E-44 | 0.347372438 | 0.668 | 0.245 | 6.43E-40 | SNX8     | 1 | CTSL_LSEC |
| 107 | 3.99E-43 | 0.34244263  | 0.564 | 0.186 | 8.69E-39 | ACSM3    | 1 | CTSL_LSEC |
| 108 | 3.21E-33 | 0.342262434 | 0.663 | 0.278 | 6.99E-29 | LRG1     | 1 | CTSL_LSEC |
| 109 | 1.11E-33 | 0.341476331 | 1     | 0.855 | 2.43E-29 | ENG      | 1 | CTSL_LSEC |
| 110 | 1.37E-37 | 0.3394846   | 0.638 | 0.258 | 2.99E-33 | DAAM1    | 1 | CTSL_LSEC |
| 111 | 1.10E-59 | 0.338470638 | 0.607 | 0.156 | 2.40E-55 | FAM102A  | 1 | CTSL_LSEC |
| 112 | 4.09E-27 | 0.338342923 | 0.997 | 0.864 | 8.91E-23 | IL6ST    | 1 | CTSL_LSEC |
| 113 | 2.03E-39 | 0.337571405 | 0.694 | 0.291 | 4.42E-35 | DRAM2    | 1 | CTSL_LSEC |
| 114 | 6.90E-36 | 0.332736782 | 0.855 | 0.443 | 1.51E-31 | LRRFIP2  | 1 | CTSL_LSEC |
| 115 | 3.15E-35 | 0.330585614 | 0.992 | 0.813 | 6.87E-31 | NPC2     | 1 | CTSL_LSEC |
| 116 | 3.45E-34 | 0.326971018 | 0.584 | 0.237 | 7.52E-30 | SCPEP1   | 1 | CTSL_LSEC |
| 117 | 1.82E-32 | 0.326056265 | 0.946 | 0.567 | 3.98E-28 | LY96     | 1 | CTSL_LSEC |
| 118 | 3.48E-19 | 0.324431935 | 0.663 | 0.357 | 7.58E-15 | OLFM1    | 1 | CTSL_LSEC |
| 119 | 1.19E-27 | 0.323369863 | 0.969 | 0.721 | 2.59E-23 | CCNI     | 1 | CTSL_LSEC |
| 120 | 8.73E-30 | 0.323349692 | 0.834 | 0.452 | 1.90E-25 | GRINA    | 1 | CTSL_LSEC |
| 121 | 7.71E-39 | 0.322119853 | 0.633 | 0.239 | 1.68E-34 | ART4     | 1 | CTSL_LSEC |
| 122 | 3.11E-27 | 0.317056527 | 0.727 | 0.377 | 6.78E-23 | TSPAN6   | 1 | CTSL_LSEC |
| 123 | 3.13E-38 | 0.316099263 | 0.582 | 0.207 | 6.84E-34 | NR5A2    | 1 | CTSL_LSEC |
| 124 | 1.42E-32 | 0.31479651  | 0.597 | 0.245 | 3.10E-28 | TMEM106C | 1 | CTSL_LSEC |
| 125 | 4.79E-33 | 0.314715887 | 0.681 | 0.29  | 1.05E-28 | ALDH6A1  | 1 | CTSL_LSEC |
| 126 | 9.23E-45 | 0.313711689 | 0.357 | 0.073 | 2.01E-40 | CD200R1  | 1 | CTSL_LSEC |
| 127 | 3.20E-33 | 0.310868661 | 0.972 | 0.715 | 6.98E-29 | GYPC     | 1 | CTSL_LSEC |
| 128 | 1.06E-28 | 0.30934059  | 0.602 | 0.269 | 2.31E-24 | NUAK1    | 1 | CTSL_LSEC |
| 129 | 3.46E-23 | 0.30791959  | 0.913 | 0.564 | 7.55E-19 | DLC1     | 1 | CTSL_LSEC |
| 130 | 3.49E-34 | 0.306544594 | 0.38  | 0.108 | 7.61E-30 | ME2      | 1 | CTSL_LSEC |
| 131 | 4.34E-49 | 0.306218008 | 0.36  | 0.065 | 9.46E-45 | SLC8A1   | 1 | CTSL_LSEC |
| 132 | 2.12E-42 | 0.305363654 | 0.408 | 0.102 | 4.62E-38 | SLC31A2  | 1 | CTSL_LSEC |
| 133 | 4.55E-27 | 0.304797925 | 0.865 | 0.511 | 9.93E-23 | PDE2A    | 1 | CTSL_LSEC |
| 134 | 6.40E-32 | 0.303999638 | 0.365 | 0.106 | 1.40E-27 | HTR2B    | 1 | CTSL_LSEC |
| 135 | 3.24E-32 | 0.300338375 | 0.773 | 0.375 | 7.07E-28 | HEXB     | 1 | CTSL_LSEC |
| 136 | 1.80E-31 | 0.299350412 | 0.645 | 0.284 | 3.93E-27 | RAB20    | 1 | CTSL_LSEC |
| 137 | 3.22E-25 | 0.299191142 | 0.908 | 0.583 | 7.02E-21 | NUCB1    | 1 | CTSL_LSEC |
| 138 | 1.56E-25 | 0.299143514 | 0.949 | 0.613 | 3.39E-21 | CLEC2B   | 1 | CTSL_LSEC |



|     |          |             |       |       |          |               |   |           |
|-----|----------|-------------|-------|-------|----------|---------------|---|-----------|
| 139 | 1.90E-38 | 0.298053945 | 0.418 | 0.116 | 4.14E-34 | USP13         | 1 | CTSL_LSEC |
| 140 | 1.94E-35 | 0.297940312 | 0.5   | 0.173 | 4.22E-31 | PDIA5         | 1 | CTSL_LSEC |
| 141 | 2.62E-46 | 0.297594993 | 0.268 | 0.034 | 5.70E-42 | COL21A1       | 1 | CTSL_LSEC |
| 142 | 2.00E-23 | 0.296879167 | 0.997 | 0.852 | 4.36E-19 | IGFBP4        | 1 | CTSL_LSEC |
| 143 | 8.22E-28 | 0.295713713 | 0.974 | 0.709 | 1.79E-23 | MARCKSL1      | 1 | CTSL_LSEC |
| 144 | 2.85E-30 | 0.295692335 | 0.556 | 0.23  | 6.21E-26 | CHST12        | 1 | CTSL_LSEC |
| 145 | 1.71E-34 | 0.295265618 | 0.51  | 0.183 | 3.73E-30 | DERA          | 1 | CTSL_LSEC |
| 146 | 1.24E-28 | 0.295174124 | 0.849 | 0.456 | 2.70E-24 | TMEM50B       | 1 | CTSL_LSEC |
| 147 | 1.46E-30 | 0.293758514 | 0.454 | 0.162 | 3.19E-26 | RP11-228B15.4 | 1 | CTSL_LSEC |
| 148 | 1.33E-24 | 0.293609121 | 0.839 | 0.49  | 2.89E-20 | CD164         | 1 | CTSL_LSEC |
| 149 | 1.55E-22 | 0.292055185 | 0.992 | 0.787 | 3.39E-18 | TSPAN7        | 1 | CTSL_LSEC |
| 150 | 7.83E-19 | 0.291640474 | 0.546 | 0.272 | 1.71E-14 | DNAJB11       | 1 | CTSL_LSEC |
| 151 | 7.73E-31 | 0.29146233  | 0.827 | 0.432 | 1.69E-26 | SMTN          | 1 | CTSL_LSEC |
| 152 | 1.91E-38 | 0.291389048 | 0.617 | 0.234 | 4.16E-34 | CMTM3         | 1 | CTSL_LSEC |
| 153 | 1.62E-25 | 0.289942039 | 0.885 | 0.516 | 3.52E-21 | MYDGF         | 1 | CTSL_LSEC |
| 154 | 2.50E-31 | 0.289734066 | 0.403 | 0.126 | 5.44E-27 | MANEA         | 1 | CTSL_LSEC |
| 155 | 5.93E-24 | 0.289261828 | 0.628 | 0.309 | 1.29E-19 | ERP44         | 1 | CTSL_LSEC |
| 156 | 6.10E-27 | 0.288395847 | 0.997 | 0.881 | 1.33E-22 | PPIB          | 1 | CTSL_LSEC |
| 157 | 5.94E-45 | 0.288043717 | 0.324 | 0.059 | 1.30E-40 | RCSD1         | 1 | CTSL_LSEC |
| 158 | 6.90E-39 | 0.286598849 | 0.462 | 0.138 | 1.51E-34 | TBC1D4        | 1 | CTSL_LSEC |
| 159 | 4.66E-24 | 0.28632592  | 0.753 | 0.409 | 1.02E-19 | SLC44A2       | 1 | CTSL_LSEC |
| 160 | 6.98E-25 | 0.284266305 | 0.694 | 0.349 | 1.52E-20 | CSF1          | 1 | CTSL_LSEC |
| 161 | 9.89E-24 | 0.283876229 | 0.587 | 0.278 | 2.16E-19 | ARHGEF7       | 1 | CTSL_LSEC |
| 162 | 1.03E-34 | 0.283020287 | 0.352 | 0.092 | 2.24E-30 | CXADR         | 1 | CTSL_LSEC |
| 163 | 3.88E-42 | 0.282993855 | 0.441 | 0.122 | 8.45E-38 | SMPDL3A       | 1 | CTSL_LSEC |
| 164 | 4.16E-27 | 0.282853644 | 0.52  | 0.219 | 9.08E-23 | PELO          | 1 | CTSL_LSEC |
| 165 | 4.91E-20 | 0.282759036 | 0.212 | 0.057 | 1.07E-15 | GDF15         | 1 | CTSL_LSEC |
| 166 | 2.09E-31 | 0.282463567 | 0.599 | 0.25  | 4.56E-27 | TMED3         | 1 | CTSL_LSEC |
| 167 | 9.42E-25 | 0.282444552 | 0.895 | 0.567 | 2.06E-20 | AP2M1         | 1 | CTSL_LSEC |
| 168 | 7.63E-26 | 0.281571454 | 1     | 0.902 | 1.66E-21 | TFPI          | 1 | CTSL_LSEC |
| 169 | 6.14E-36 | 0.28044319  | 0.474 | 0.151 | 1.34E-31 | ZNF765        | 1 | CTSL_LSEC |
| 170 | 3.12E-39 | 0.278829096 | 0.27  | 0.047 | 6.80E-35 | GATA3         | 1 | CTSL_LSEC |
| 171 | 3.53E-23 | 0.278392046 | 0.862 | 0.464 | 7.70E-19 | TFPI2         | 1 | CTSL_LSEC |
| 172 | 1.67E-29 | 0.277393553 | 0.309 | 0.084 | 3.64E-25 | RGS16         | 1 | CTSL_LSEC |
| 173 | 2.49E-21 | 0.276963803 | 0.913 | 0.596 | 5.42E-17 | KDELR1        | 1 | CTSL_LSEC |
| 174 | 3.44E-24 | 0.276506626 | 0.745 | 0.383 | 7.49E-20 | PHACTR2       | 1 | CTSL_LSEC |
| 175 | 7.19E-29 | 0.276303356 | 0.821 | 0.44  | 1.57E-24 | ACTN1         | 1 | CTSL_LSEC |
| 176 | 1.83E-23 | 0.274611607 | 0.992 | 0.892 | 4.00E-19 | ACTG1         | 1 | CTSL_LSEC |
| 177 | 9.56E-23 | 0.273500111 | 0.819 | 0.483 | 2.09E-18 | BNIP3L        | 1 | CTSL_LSEC |
| 178 | 5.16E-21 | 0.273473844 | 0.872 | 0.545 | 1.13E-16 | LEPROT        | 1 | CTSL_LSEC |
| 179 | 3.04E-19 | 0.272207808 | 0.952 | 0.707 | 6.63E-15 | CD151         | 1 | CTSL_LSEC |
| 180 | 3.52E-30 | 0.271712727 | 0.62  | 0.265 | 7.68E-26 | CNST          | 1 | CTSL_LSEC |
| 181 | 9.64E-26 | 0.271653118 | 0.801 | 0.419 | 2.10E-21 | NPY1R         | 1 | CTSL_LSEC |
| 182 | 1.19E-33 | 0.271441328 | 0.615 | 0.237 | 2.60E-29 | VMO1          | 1 | CTSL_LSEC |
| 183 | 1.56E-33 | 0.270389551 | 0.651 | 0.278 | 3.41E-29 | GLMP          | 1 | CTSL_LSEC |
| 184 | 1.85E-26 | 0.269616661 | 0.543 | 0.226 | 4.04E-22 | SORBS1        | 1 | CTSL_LSEC |
| 185 | 1.40E-29 | 0.269120256 | 0.462 | 0.17  | 3.05E-25 | TRIM35        | 1 | CTSL_LSEC |
| 186 | 4.64E-39 | 0.268538748 | 0.406 | 0.106 | 1.01E-34 | SLC7A8        | 1 | CTSL_LSEC |
| 187 | 1.22E-37 | 0.267907339 | 0.431 | 0.124 | 2.66E-33 | PHLDB2        | 1 | CTSL_LSEC |
| 188 | 1.71E-34 | 0.267615652 | 0.393 | 0.112 | 3.72E-30 | ANKRD44       | 1 | CTSL_LSEC |
| 189 | 3.42E-36 | 0.267458368 | 0.485 | 0.156 | 7.46E-32 | HTATIP2       | 1 | CTSL_LSEC |
| 190 | 1.42E-34 | 0.266798759 | 0.472 | 0.152 | 3.09E-30 | ATP1B1        | 1 | CTSL_LSEC |
| 191 | 1.40E-24 | 0.266788083 | 0.74  | 0.38  | 3.04E-20 | LIMCH1        | 1 | CTSL_LSEC |
| 192 | 1.53E-29 | 0.266625695 | 0.773 | 0.385 | 3.34E-25 | RRBP1         | 1 | CTSL_LSEC |
| 193 | 3.16E-23 | 0.26656301  | 0.793 | 0.443 | 6.90E-19 | RPN1          | 1 | CTSL_LSEC |
| 194 | 2.97E-25 | 0.265741259 | 0.523 | 0.225 | 6.47E-21 | ZEB2          | 1 | CTSL_LSEC |
| 195 | 5.15E-24 | 0.265365166 | 0.691 | 0.354 | 1.12E-19 | DDOST         | 1 | CTSL_LSEC |
| 196 | 5.96E-40 | 0.262939366 | 0.39  | 0.099 | 1.30E-35 | PIEZO2        | 1 | CTSL_LSEC |
| 197 | 1.27E-33 | 0.262541217 | 0.431 | 0.135 | 2.77E-29 | TBXA2R        | 1 | CTSL_LSEC |
| 198 | 6.74E-21 | 0.262107034 | 0.969 | 0.691 | 1.47E-16 | ITGB1         | 1 | CTSL_LSEC |
| 199 | 1.86E-28 | 0.261758303 | 0.426 | 0.154 | 4.05E-24 | TMTC4         | 1 | CTSL_LSEC |
| 200 | 4.84E-26 | 0.260846738 | 0.804 | 0.411 | 1.06E-21 | NRP1          | 1 | CTSL_LSEC |
| 201 | 2.75E-25 | 0.260644336 | 0.679 | 0.34  | 6.00E-21 | DEGS1         | 1 | CTSL_LSEC |
| 202 | 2.28E-25 | 0.260603125 | 0.796 | 0.438 | 4.98E-21 | CCNG1         | 1 | CTSL_LSEC |
| 203 | 3.12E-31 | 0.257351521 | 0.763 | 0.353 | 6.81E-27 | NR2F1         | 1 | CTSL_LSEC |
| 204 | 1.99E-25 | 0.254871656 | 0.724 | 0.367 | 4.33E-21 | CTSF          | 1 | CTSL_LSEC |
| 205 | 4.18E-28 | 0.253877979 | 0.599 | 0.266 | 9.11E-24 | EPS15         | 1 | CTSL_LSEC |
| 206 | 5.96E-29 | 0.252789035 | 0.934 | 0.564 | 1.30E-24 | MAF           | 1 | CTSL_LSEC |
| 207 | 5.36E-20 | 0.251449902 | 0.977 | 0.707 | 1.17E-15 | LIFR          | 1 | CTSL_LSEC |
| 208 | 7.00E-29 | 0.251303398 | 0.571 | 0.245 | 1.53E-24 | BFAR          | 1 | CTSL_LSEC |

|     |          |              |       |       |             |          |   |           |
|-----|----------|--------------|-------|-------|-------------|----------|---|-----------|
| 209 | 1.25E-31 | 0.251042801  | 0.357 | 0.103 | 2.72E-27    | HS3ST3B1 | 1 | CTSL_LSEC |
| 210 | 1.93E-27 | 0.250990625  | 0.635 | 0.29  | 4.21E-23    | BLCAP    | 1 | CTSL_LSEC |
| 211 | 7.73E-08 | -0.260245385 | 0.964 | 0.858 | 0.001685292 | RPS26    | 1 | CTSL_LSEC |
| 212 | 9.43E-11 | -0.262616615 | 1     | 0.985 | 2.06E-06    | TMSB4X   | 1 | CTSL_LSEC |
| 213 | 2.27E-08 | -0.262707869 | 0.954 | 0.839 | 0.000494926 | TMA7     | 1 | CTSL_LSEC |
| 214 | 8.34E-12 | -0.269758812 | 0.997 | 0.945 | 1.82E-07    | PTMA     | 1 | CTSL_LSEC |
| 215 | 2.67E-31 | -0.28292106  | 0.995 | 0.988 | 5.83E-27    | RPL34    | 1 | CTSL_LSEC |
| 216 | 4.62E-25 | -0.336068874 | 1     | 0.977 | 1.01E-20    | IFITM3   | 1 | CTSL_LSEC |
| 217 | 3.03E-17 | -0.346803818 | 0.997 | 0.935 | 6.61E-13    | IFITM2   | 1 | CTSL_LSEC |
| 218 | 2.70E-07 | -0.370398959 | 0.916 | 0.789 | 0.005895728 | SRGN     | 1 | CTSL_LSEC |
| 219 | 3.37E-13 | -0.448162095 | 0.908 | 0.786 | 7.35E-09    | CLEC3B   | 1 | CTSL_LSEC |
| 220 | 8.52E-10 | -0.454140524 | 0.921 | 0.798 | 1.86E-05    | HSPG2    | 1 | CTSL_LSEC |
| 221 | 4.07E-07 | -0.457249401 | 0.291 | 0.367 | 0.008886204 | JAM2     | 1 | CTSL_LSEC |
| 222 | 2.07E-20 | -0.461920922 | 0.926 | 0.824 | 4.51E-16    | FKBP1A   | 1 | CTSL_LSEC |
| 223 | 2.86E-08 | -0.462720364 | 0.122 | 0.239 | 0.000622696 | LTC4S    | 1 | CTSL_LSEC |
| 224 | 1.16E-10 | -0.471629079 | 0.117 | 0.257 | 2.52E-06    | LGALS3   | 1 | CTSL_LSEC |
| 225 | 2.18E-07 | -0.474899017 | 0.839 | 0.694 | 0.004755075 | EPAS1    | 1 | CTSL_LSEC |
| 226 | 6.96E-13 | -0.490467276 | 0.898 | 0.774 | 1.52E-08    | CALCRL   | 1 | CTSL_LSEC |
| 227 | 2.63E-09 | -0.503622706 | 0.253 | 0.36  | 5.73E-05    | EMP2     | 1 | CTSL_LSEC |
| 228 | 4.93E-07 | -0.503713387 | 0.196 | 0.29  | 0.010761571 | FAM107A  | 1 | CTSL_LSEC |
| 229 | 3.42E-11 | -0.510661001 | 0.768 | 0.694 | 7.46E-07    | S100A11  | 1 | CTSL_LSEC |
| 230 | 4.56E-09 | -0.550102422 | 0.375 | 0.442 | 9.95E-05    | BCAM     | 1 | CTSL_LSEC |
| 231 | 3.45E-07 | -0.57245724  | 0.434 | 0.468 | 0.007525383 | ATP1A1   | 1 | CTSL_LSEC |
| 232 | 1.35E-11 | -0.574439462 | 0.133 | 0.282 | 2.94E-07    | ALPL     | 1 | CTSL_LSEC |
| 233 | 1.01E-10 | -0.591254167 | 0.153 | 0.287 | 2.20E-06    | LTBP4    | 1 | CTSL_LSEC |
| 234 | 1.41E-07 | -0.626994215 | 0.347 | 0.416 | 0.003079875 | MATN2    | 1 | CTSL_LSEC |
| 235 | 4.80E-08 | -0.628499408 | 0.258 | 0.355 | 0.001046287 | HLA-DRA  | 1 | CTSL_LSEC |
| 236 | 4.67E-08 | -0.635690334 | 0.452 | 0.506 | 0.001019249 | GJA4     | 1 | CTSL_LSEC |
| 237 | 2.13E-54 | -0.63851078  | 1     | 0.988 | 4.66E-50    | TMSB10   | 1 | CTSL_LSEC |
| 238 | 6.09E-07 | -0.646057597 | 0.872 | 0.731 | 0.013284626 | PLPP1    | 1 | CTSL_LSEC |
| 239 | 2.28E-12 | -0.657645538 | 0.74  | 0.653 | 4.97E-08    | CLEC14A  | 1 | CTSL_LSEC |
| 240 | 1.88E-13 | -0.675259046 | 0.707 | 0.67  | 4.10E-09    | CRIP2    | 1 | CTSL_LSEC |
| 241 | 7.03E-18 | -0.675525349 | 0.929 | 0.879 | 1.53E-13    | HSPB1    | 1 | CTSL_LSEC |
| 242 | 9.90E-25 | -0.701411123 | 0.885 | 0.801 | 2.16E-20    | IFITM1   | 1 | CTSL_LSEC |
| 243 | 7.21E-07 | -0.723340566 | 0.446 | 0.514 | 0.015732541 | EMP1     | 1 | CTSL_LSEC |
| 244 | 7.77E-13 | -0.735725001 | 0.594 | 0.596 | 1.70E-08    | TAGLN2   | 1 | CTSL_LSEC |
| 245 | 6.33E-15 | -0.787653731 | 0.651 | 0.638 | 1.38E-10    | RAMP2    | 1 | CTSL_LSEC |
| 246 | 1.05E-06 | -0.895946684 | 0.633 | 0.57  | 0.022911557 | GSN      | 1 | CTSL_LSEC |
| 247 | 2.87E-34 | -0.942472168 | 0.75  | 0.8   | 6.26E-30    | RNASE1   | 1 | CTSL_LSEC |
| 248 | 1.61E-10 | -0.979119381 | 0.934 | 0.868 | 3.52E-06    | MT2A     | 1 | CTSL_LSEC |
| 249 | 2.39E-24 | -1.067606787 | 0.694 | 0.72  | 5.22E-20    | CD74     | 1 | CTSL_LSEC |
| 250 | 5.00E-08 | -1.079107656 | 0.207 | 0.307 | 0.001091348 | CLU      | 1 | CTSL_LSEC |
| 251 | 1.64E-13 | -1.104195981 | 0.265 | 0.403 | 3.57E-09    | PLVAP    | 1 | CTSL_LSEC |
| 252 | 5.36E-09 | -1.110855656 | 0.222 | 0.341 | 0.000116936 | MT1E     | 1 | CTSL_LSEC |
| 253 | 1.82E-14 | -1.316763756 | 0.589 | 0.606 | 3.97E-10    | S100A6   | 1 | CTSL_LSEC |
| 254 | 2.78E-28 | -1.349930765 | 0.128 | 0.394 | 6.06E-24    | VWF      | 1 | CTSL_LSEC |
| 255 | 1.21E-32 | -1.400353097 | 0.161 | 0.449 | 2.64E-28    | ADIRF    | 1 | CTSL_LSEC |
| 256 | 1.35E-41 | -1.494399233 | 0.824 | 0.795 | 2.95E-37    | VIM      | 1 | CTSL_LSEC |
| 257 | 1.16E-65 | 0.868074669  | 0.894 | 0.443 | 2.54E-61    | BGN      | 2 | BGN_LSEC  |
| 258 | 2.84E-67 | 0.76295241   | 0.728 | 0.24  | 6.20E-63    | CPM      | 2 | BGN_LSEC  |
| 259 | 1.35E-44 | 0.744659386  | 0.813 | 0.421 | 2.93E-40    | IGFBP3   | 2 | BGN_LSEC  |
| 260 | 2.27E-27 | 0.731913781  | 0.477 | 0.192 | 4.96E-23    | CD24     | 2 | BGN_LSEC  |
| 261 | 1.84E-46 | 0.655637287  | 0.988 | 0.744 | 4.02E-42    | PLPP3    | 2 | BGN_LSEC  |
| 262 | 3.67E-40 | 0.578479916  | 0.737 | 0.323 | 8.00E-36    | MATN2    | 2 | BGN_LSEC  |
| 263 | 2.55E-35 | 0.565521591  | 0.994 | 0.743 | 5.55E-31    | CRHBP    | 2 | BGN_LSEC  |
| 264 | 2.73E-38 | 0.537827341  | 0.61  | 0.245 | 5.95E-34    | FAM84A   | 2 | BGN_LSEC  |
| 265 | 3.72E-31 | 0.502656935  | 0.776 | 0.427 | 8.12E-27    | BMPER    | 2 | BGN_LSEC  |
| 266 | 5.55E-35 | 0.471153942  | 0.529 | 0.197 | 1.21E-30    | NUDT10   | 2 | BGN_LSEC  |
| 267 | 1.77E-25 | 0.469760633  | 0.692 | 0.371 | 3.85E-21    | EDNRB    | 2 | BGN_LSEC  |
| 268 | 3.18E-28 | 0.441213299  | 0.931 | 0.613 | 6.93E-24    | CLEC14A  | 2 | BGN_LSEC  |
| 269 | 1.97E-18 | 0.439552559  | 0.202 | 0.056 | 4.29E-14    | FGF23    | 2 | BGN_LSEC  |
| 270 | 8.04E-26 | 0.435522474  | 0.761 | 0.44  | 1.75E-21    | SC5D     | 2 | BGN_LSEC  |
| 271 | 2.81E-27 | 0.403891348  | 0.97  | 0.712 | 6.14E-23    | PRCP     | 2 | BGN_LSEC  |
| 272 | 4.14E-18 | 0.388351673  | 0.656 | 0.372 | 9.03E-14    | OLFM1    | 2 | BGN_LSEC  |
| 273 | 5.77E-21 | 0.386091937  | 0.577 | 0.298 | 1.26E-16    | HBEGF    | 2 | BGN_LSEC  |
| 274 | 2.19E-24 | 0.368981875  | 0.894 | 0.56  | 4.77E-20    | F2R      | 2 | BGN_LSEC  |
| 275 | 4.30E-17 | 0.359832742  | 0.943 | 0.732 | 9.37E-13    | SOCS3    | 2 | BGN_LSEC  |
| 276 | 1.09E-24 | 0.358942669  | 0.985 | 0.774 | 2.38E-20    | CLEC3B   | 2 | BGN_LSEC  |
| 277 | 6.18E-22 | 0.357053396  | 0.625 | 0.321 | 1.35E-17    | HECW2    | 2 | BGN_LSEC  |
| 278 | 1.02E-15 | 0.356147817  | 0.861 | 0.647 | 2.23E-11    | TSC22D3  | 2 | BGN_LSEC  |

|     |          |              |       |       |             |               |   |            |
|-----|----------|--------------|-------|-------|-------------|---------------|---|------------|
| 279 | 2.05E-29 | 0.354629524  | 0.48  | 0.178 | 4.47E-25    | GPRC5C        | 2 | BGN_LSEC   |
| 280 | 5.94E-17 | 0.351076423  | 0.991 | 0.838 | 1.30E-12    | FOS           | 2 | BGN_LSEC   |
| 281 | 3.91E-18 | 0.343011664  | 0.767 | 0.488 | 8.53E-14    | EFNB1         | 2 | BGN_LSEC   |
| 282 | 1.69E-20 | 0.341300064  | 0.776 | 0.459 | 3.68E-16    | ADD3          | 2 | BGN_LSEC   |
| 283 | 1.09E-21 | 0.341278834  | 0.619 | 0.317 | 2.39E-17    | LHFP          | 2 | BGN_LSEC   |
| 284 | 1.03E-16 | 0.334232782  | 0.903 | 0.638 | 2.25E-12    | DUSP6         | 2 | BGN_LSEC   |
| 285 | 4.54E-15 | 0.325861693  | 0.967 | 0.783 | 9.90E-11    | SRGN          | 2 | BGN_LSEC   |
| 286 | 6.79E-12 | 0.322001928  | 0.909 | 0.707 | 1.48E-07    | DDIT4         | 2 | BGN_LSEC   |
| 287 | 1.02E-24 | 0.320094856  | 0.42  | 0.157 | 2.24E-20    | RP11-767I20.1 | 2 | BGN_LSEC   |
| 288 | 3.95E-15 | 0.318789219  | 0.562 | 0.318 | 8.61E-11    | LRG1          | 2 | BGN_LSEC   |
| 289 | 4.34E-21 | 0.316736316  | 0.97  | 0.765 | 9.46E-17    | LDB2          | 2 | BGN_LSEC   |
| 290 | 1.44E-17 | 0.313227211  | 0.589 | 0.321 | 3.15E-13    | PCDH17        | 2 | BGN_LSEC   |
| 291 | 2.74E-16 | 0.312419663  | 0.903 | 0.631 | 5.97E-12    | FOSB          | 2 | BGN_LSEC   |
| 292 | 1.39E-22 | 0.312197928  | 0.459 | 0.187 | 3.03E-18    | FAM198B       | 2 | BGN_LSEC   |
| 293 | 1.25E-17 | 0.30965744   | 0.837 | 0.534 | 2.72E-13    | ST6GALNAC3    | 2 | BGN_LSEC   |
| 294 | 4.45E-16 | 0.308748279  | 0.931 | 0.727 | 9.71E-12    | F8            | 2 | BGN_LSEC   |
| 295 | 5.92E-15 | 0.308133756  | 0.994 | 0.803 | 1.29E-10    | ZFP36         | 2 | BGN_LSEC   |
| 296 | 2.81E-16 | 0.305237666  | 0.918 | 0.661 | 6.12E-12    | CDKN1A        | 2 | BGN_LSEC   |
| 297 | 8.28E-18 | 0.300062613  | 0.982 | 0.799 | 1.80E-13    | TSPAN7        | 2 | BGN_LSEC   |
| 298 | 6.08E-20 | 0.299186309  | 0.514 | 0.243 | 1.33E-15    | DSE           | 2 | BGN_LSEC   |
| 299 | 8.16E-18 | 0.298330261  | 0.915 | 0.658 | 1.78E-13    | ETS2          | 2 | BGN_LSEC   |
| 300 | 1.83E-18 | 0.297104461  | 0.991 | 0.857 | 3.98E-14    | DUSP1         | 2 | BGN_LSEC   |
| 301 | 1.41E-11 | 0.293903836  | 0.909 | 0.737 | 3.07E-07    | RHOB          | 2 | BGN_LSEC   |
| 302 | 2.76E-18 | 0.291712076  | 0.991 | 0.818 | 6.02E-14    | JUNB          | 2 | BGN_LSEC   |
| 303 | 4.45E-17 | 0.291262642  | 0.985 | 0.816 | 9.72E-13    | JUN           | 2 | BGN_LSEC   |
| 304 | 6.54E-16 | 0.289243887  | 0.976 | 0.748 | 1.43E-11    | TINAGL1       | 2 | BGN_LSEC   |
| 305 | 5.22E-26 | 0.289108326  | 0.526 | 0.222 | 1.14E-21    | CLEC11A       | 2 | BGN_LSEC   |
| 306 | 3.13E-15 | 0.288692099  | 0.387 | 0.183 | 6.83E-11    | RBKS          | 2 | BGN_LSEC   |
| 307 | 1.14E-18 | 0.288328684  | 0.864 | 0.562 | 2.49E-14    | SRPX          | 2 | BGN_LSEC   |
| 308 | 3.62E-14 | 0.286153354  | 0.949 | 0.684 | 7.90E-10    | AKAP12        | 2 | BGN_LSEC   |
| 309 | 8.61E-11 | 0.285951669  | 0.695 | 0.473 | 1.88E-06    | HES1          | 2 | BGN_LSEC   |
| 310 | 1.57E-17 | 0.283206382  | 0.961 | 0.725 | 3.42E-13    | A2M           | 2 | BGN_LSEC   |
| 311 | 7.21E-15 | 0.281522193  | 0.927 | 0.666 | 1.57E-10    | KLF4          | 2 | BGN_LSEC   |
| 312 | 7.94E-14 | 0.27977184   | 0.689 | 0.429 | 1.73E-09    | MDK           | 2 | BGN_LSEC   |
| 313 | 4.25E-19 | 0.2796894    | 0.918 | 0.637 | 9.27E-15    | RDX           | 2 | BGN_LSEC   |
| 314 | 4.79E-16 | 0.278970549  | 0.921 | 0.633 | 1.04E-11    | ADGRF5        | 2 | BGN_LSEC   |
| 315 | 1.13E-10 | 0.27887863   | 0.713 | 0.492 | 2.47E-06    | GPX3          | 2 | BGN_LSEC   |
| 316 | 8.37E-24 | 0.278247219  | 0.311 | 0.098 | 1.83E-19    | SNAI2         | 2 | BGN_LSEC   |
| 317 | 1.11E-12 | 0.278059232  | 0.934 | 0.72  | 2.42E-08    | CLDN5         | 2 | BGN_LSEC   |
| 318 | 5.51E-17 | 0.274154666  | 0.994 | 0.839 | 1.20E-12    | IL33          | 2 | BGN_LSEC   |
| 319 | 1.41E-15 | 0.274135769  | 0.779 | 0.5   | 3.07E-11    | TFPI2         | 2 | BGN_LSEC   |
| 320 | 7.07E-12 | 0.272977678  | 0.779 | 0.535 | 1.54E-07    | MYC           | 2 | BGN_LSEC   |
| 321 | 1.78E-14 | 0.270637671  | 0.704 | 0.437 | 3.87E-10    | PDCD4         | 2 | BGN_LSEC   |
| 322 | 6.60E-17 | 0.270611623  | 0.532 | 0.271 | 1.44E-12    | SPRY4         | 2 | BGN_LSEC   |
| 323 | 3.09E-13 | 0.270169271  | 0.671 | 0.417 | 6.73E-09    | SOX17         | 2 | BGN_LSEC   |
| 324 | 3.08E-14 | 0.265585024  | 0.538 | 0.295 | 6.72E-10    | ERVK3-1       | 2 | BGN_LSEC   |
| 325 | 5.38E-13 | 0.262386297  | 0.447 | 0.238 | 1.17E-08    | PAPSS2        | 2 | BGN_LSEC   |
| 326 | 4.87E-17 | 0.260569911  | 0.813 | 0.505 | 1.06E-12    | NR4A1         | 2 | BGN_LSEC   |
| 327 | 2.35E-17 | 0.260256649  | 0.55  | 0.281 | 5.13E-13    | APOLD1        | 2 | BGN_LSEC   |
| 328 | 7.02E-11 | 0.259683319  | 0.541 | 0.335 | 1.53E-06    | CITED2        | 2 | BGN_LSEC   |
| 329 | 1.02E-12 | 0.255368934  | 0.958 | 0.711 | 2.23E-08    | PDIA3         | 2 | BGN_LSEC   |
| 330 | 8.51E-18 | 0.254094485  | 0.746 | 0.441 | 1.86E-13    | NRP1          | 2 | BGN_LSEC   |
| 331 | 1.71E-14 | 0.252259602  | 0.819 | 0.517 | 3.73E-10    | CD36          | 2 | BGN_LSEC   |
| 332 | 1.53E-10 | 0.250641437  | 0.888 | 0.652 | 3.33E-06    | PPP1R15A      | 2 | BGN_LSEC   |
| 333 | 6.88E-09 | -0.379080544 | 1     | 0.962 | 0.000150114 | MT-CO1        | 2 | BGN_LSEC   |
| 334 | 7.74E-10 | -0.405609443 | 0.997 | 0.954 | 1.69E-05    | MT-CO3        | 2 | BGN_LSEC   |
| 335 | 4.23E-08 | -0.442762022 | 0.952 | 0.872 | 0.000921935 | MT-ND2        | 2 | BGN_LSEC   |
| 336 | 7.01E-11 | -0.472692503 | 0.994 | 0.933 | 1.53E-06    | MT-ND3        | 2 | BGN_LSEC   |
| 337 | 2.48E-23 | -0.494841738 | 0.967 | 0.928 | 5.41E-19    | S100A10       | 2 | BGN_LSEC   |
| 338 | 1.56E-09 | -0.775769966 | 0.112 | 0.254 | 3.40E-05    | AQP1          | 2 | BGN_LSEC   |
| 339 | 1.29E-13 | -1.191506278 | 0.523 | 0.621 | 2.82E-09    | S100A6        | 2 | BGN_LSEC   |
| 340 | 4.73E-24 | 1.052984986  | 0.779 | 0.645 | 1.03E-19    | STAB1         | 3 | STAB1_LSEC |
| 341 | 1.32E-25 | 0.956496694  | 0.432 | 0.197 | 2.87E-21    | MT1G          | 3 | STAB1_LSEC |
| 342 | 1.43E-25 | 0.938978236  | 0.656 | 0.445 | 3.12E-21    | MEG3          | 3 | STAB1_LSEC |
| 343 | 1.38E-13 | 0.924362105  | 0.405 | 0.249 | 3.01E-09    | SERPINA1      | 3 | STAB1_LSEC |
| 344 | 4.79E-29 | 0.901852515  | 0.956 | 0.824 | 1.04E-24    | NEAT1         | 3 | STAB1_LSEC |
| 345 | 1.25E-65 | 0.820607471  | 1     | 0.974 | 2.72E-61    | MT-CO2        | 3 | STAB1_LSEC |
| 346 | 7.91E-09 | 0.805365331  | 0.429 | 0.32  | 0.000172516 | ALB           | 3 | STAB1_LSEC |
| 347 | 7.12E-66 | 0.802903196  | 0.997 | 0.964 | 1.55E-61    | MT-CO1        | 3 | STAB1_LSEC |
| 348 | 7.96E-45 | 0.787162804  | 0.98  | 0.885 | 1.74E-40    | MT-ATP8       | 3 | STAB1_LSEC |

|     |          |              |       |       |             |           |   |            |
|-----|----------|--------------|-------|-------|-------------|-----------|---|------------|
| 349 | 8.77E-45 | 0.763277721  | 0.98  | 0.937 | 1.91E-40    | MT-ATP6   | 3 | STAB1_LSEC |
| 350 | 3.38E-45 | 0.738611406  | 0.966 | 0.872 | 7.38E-41    | MT-ND2    | 3 | STAB1_LSEC |
| 351 | 1.35E-49 | 0.730124027  | 0.997 | 0.955 | 2.93E-45    | MT-CO3    | 3 | STAB1_LSEC |
| 352 | 2.76E-46 | 0.71457163   | 0.983 | 0.929 | 6.01E-42    | MT-ND4L   | 3 | STAB1_LSEC |
| 353 | 1.32E-13 | 0.694557122  | 0.306 | 0.151 | 2.88E-09    | APOC1     | 3 | STAB1_LSEC |
| 354 | 2.59E-44 | 0.685776783  | 0.99  | 0.935 | 5.65E-40    | MT-ND3    | 3 | STAB1_LSEC |
| 355 | 1.08E-06 | 0.682671972  | 0.102 | 0.037 | 0.023523531 | HAMP      | 3 | STAB1_LSEC |
| 356 | 1.44E-44 | 0.682122986  | 0.986 | 0.922 | 3.13E-40    | MT-CYB    | 3 | STAB1_LSEC |
| 357 | 3.80E-34 | 0.679097758  | 0.969 | 0.872 | 8.28E-30    | MT-ND5    | 3 | STAB1_LSEC |
| 358 | 1.62E-35 | 0.648982343  | 0.98  | 0.901 | 3.53E-31    | MT-ND4    | 3 | STAB1_LSEC |
| 359 | 4.08E-13 | 0.646501053  | 0.276 | 0.127 | 8.90E-09    | APOC3     | 3 | STAB1_LSEC |
| 360 | 2.53E-11 | 0.640578572  | 0.636 | 0.497 | 5.51E-07    | STAB2     | 3 | STAB1_LSEC |
| 361 | 1.67E-31 | 0.638233798  | 0.966 | 0.885 | 3.65E-27    | MT-ND1    | 3 | STAB1_LSEC |
| 362 | 4.39E-27 | 0.636859253  | 0.99  | 0.893 | 9.58E-23    | MALAT1    | 3 | STAB1_LSEC |
| 363 | 4.71E-07 | 0.585536917  | 0.534 | 0.512 | 0.010274506 | TNFRSF10D | 3 | STAB1_LSEC |
| 364 | 7.42E-19 | 0.565307564  | 0.799 | 0.701 | 1.62E-14    | PPFIBP1   | 3 | STAB1_LSEC |
| 365 | 1.05E-10 | 0.552192479  | 0.82  | 0.772 | 2.30E-06    | SLC2A3    | 3 | STAB1_LSEC |
| 366 | 1.69E-19 | 0.528656311  | 0.153 | 0.03  | 3.68E-15    | FABP1     | 3 | STAB1_LSEC |
| 367 | 1.08E-10 | 0.497879279  | 0.718 | 0.558 | 2.35E-06    | CLEC4M    | 3 | STAB1_LSEC |
| 368 | 1.52E-06 | 0.495680606  | 0.694 | 0.67  | 0.033077892 | PDK4      | 3 | STAB1_LSEC |
| 369 | 1.38E-08 | 0.47222887   | 0.599 | 0.561 | 0.000301572 | N4BP2L2   | 3 | STAB1_LSEC |
| 370 | 1.67E-07 | 0.44262323   | 0.687 | 0.644 | 0.003647117 | ADM       | 3 | STAB1_LSEC |
| 371 | 6.99E-07 | 0.42648453   | 0.677 | 0.656 | 0.015242688 | FUS       | 3 | STAB1_LSEC |
| 372 | 4.61E-11 | 0.381367959  | 0.16  | 0.055 | 1.01E-06    | SAA2      | 3 | STAB1_LSEC |
| 373 | 3.17E-09 | 0.379773861  | 0.711 | 0.683 | 6.91E-05    | CLEC2B    | 3 | STAB1_LSEC |
| 374 | 3.48E-14 | 0.353395633  | 0.173 | 0.052 | 7.58E-10    | APOA2     | 3 | STAB1_LSEC |
| 375 | 2.41E-14 | 0.346680814  | 0.976 | 0.924 | 5.26E-10    | CCL14     | 3 | STAB1_LSEC |
| 376 | 4.11E-10 | 0.339179833  | 0.827 | 0.664 | 8.96E-06    | FCN2      | 3 | STAB1_LSEC |
| 377 | 9.20E-09 | 0.332891644  | 0.129 | 0.045 | 0.000200545 | TTR       | 3 | STAB1_LSEC |
| 378 | 9.15E-11 | 0.308360197  | 0.942 | 0.802 | 1.99E-06    | DNASE1L3  | 3 | STAB1_LSEC |
| 379 | 2.56E-09 | 0.307423338  | 0.105 | 0.031 | 5.58E-05    | ALDOB     | 3 | STAB1_LSEC |
| 380 | 8.82E-10 | 0.291761346  | 0.119 | 0.036 | 1.92E-05    | MT1H      | 3 | STAB1_LSEC |
| 381 | 1.33E-06 | 0.286321565  | 0.102 | 0.038 | 0.029002536 | ADH1B     | 3 | STAB1_LSEC |
| 382 | 2.85E-15 | 0.281037509  | 0.105 | 0.018 | 6.21E-11    | AGXT      | 3 | STAB1_LSEC |
| 383 | 2.59E-09 | -0.250066121 | 0.184 | 0.392 | 5.66E-05    | SMAGP     | 3 | STAB1_LSEC |
| 384 | 2.35E-07 | -0.250097814 | 0.558 | 0.76  | 0.005114015 | CTSB      | 3 | STAB1_LSEC |
| 385 | 1.42E-09 | -0.250273452 | 0.163 | 0.376 | 3.10E-05    | ERVK3-1   | 3 | STAB1_LSEC |
| 386 | 1.53E-07 | -0.250322637 | 0.102 | 0.251 | 0.003334213 | LGALS3    | 3 | STAB1_LSEC |
| 387 | 6.88E-09 | -0.251208753 | 0.452 | 0.687 | 0.000150015 | DAZAP2    | 3 | STAB1_LSEC |
| 388 | 1.98E-08 | -0.25158843  | 0.442 | 0.647 | 0.000431635 | EGR1      | 3 | STAB1_LSEC |
| 389 | 3.00E-07 | -0.251760896 | 0.31  | 0.523 | 0.006539924 | MRPL33    | 3 | STAB1_LSEC |
| 390 | 1.28E-11 | -0.251925176 | 0.293 | 0.584 | 2.79E-07    | CDC42     | 3 | STAB1_LSEC |
| 391 | 9.66E-09 | -0.252169359 | 0.381 | 0.641 | 0.000210769 | SMDT1     | 3 | STAB1_LSEC |
| 392 | 5.93E-11 | -0.25268407  | 0.466 | 0.749 | 1.29E-06    | ANXA5     | 3 | STAB1_LSEC |
| 393 | 5.60E-10 | -0.252761497 | 0.418 | 0.694 | 1.22E-05    | C12orf57  | 3 | STAB1_LSEC |
| 394 | 1.35E-09 | -0.253751855 | 0.463 | 0.702 | 2.93E-05    | LDHA      | 3 | STAB1_LSEC |
| 395 | 8.17E-09 | -0.254119938 | 0.486 | 0.732 | 0.00017828  | PTRF      | 3 | STAB1_LSEC |
| 396 | 4.44E-14 | -0.254399554 | 0.881 | 0.97  | 9.68E-10    | RPS9      | 3 | STAB1_LSEC |
| 397 | 6.05E-09 | -0.254617164 | 0.197 | 0.406 | 0.000131845 | PEA15     | 3 | STAB1_LSEC |
| 398 | 1.35E-08 | -0.256237083 | 0.435 | 0.681 | 0.000295332 | AP2M1     | 3 | STAB1_LSEC |
| 399 | 1.86E-06 | -0.256368877 | 0.133 | 0.275 | 0.040556095 | SLCO2A1   | 3 | STAB1_LSEC |
| 400 | 3.67E-07 | -0.256503374 | 0.493 | 0.693 | 0.007995817 | HEBP1     | 3 | STAB1_LSEC |
| 401 | 4.60E-12 | -0.256832492 | 0.238 | 0.507 | 1.00E-07    | VAMP3     | 3 | STAB1_LSEC |
| 402 | 5.35E-16 | -0.256853218 | 0.949 | 0.998 | 1.17E-11    | RPS27     | 3 | STAB1_LSEC |
| 403 | 2.23E-09 | -0.257148796 | 0.19  | 0.408 | 4.86E-05    | PSMB5     | 3 | STAB1_LSEC |
| 404 | 3.04E-08 | -0.257475819 | 0.551 | 0.771 | 0.00066301  | EIF3F     | 3 | STAB1_LSEC |
| 405 | 2.94E-08 | -0.257998246 | 0.187 | 0.382 | 0.000642054 | JAM2      | 3 | STAB1_LSEC |
| 406 | 2.48E-10 | -0.258261266 | 0.418 | 0.673 | 5.41E-06    | RAP1B     | 3 | STAB1_LSEC |
| 407 | 9.46E-10 | -0.259336826 | 0.259 | 0.5   | 2.06E-05    | LTA4H     | 3 | STAB1_LSEC |
| 408 | 4.78E-11 | -0.259715182 | 0.211 | 0.456 | 1.04E-06    | PPP2R1A   | 3 | STAB1_LSEC |
| 409 | 1.55E-08 | -0.260659716 | 0.259 | 0.478 | 0.000337607 | IGBP1     | 3 | STAB1_LSEC |
| 410 | 3.44E-10 | -0.261001498 | 0.224 | 0.46  | 7.51E-06    | PGAM1     | 3 | STAB1_LSEC |
| 411 | 6.51E-14 | -0.261689969 | 0.901 | 0.984 | 1.42E-09    | RPL7A     | 3 | STAB1_LSEC |
| 412 | 7.65E-08 | -0.261765914 | 0.167 | 0.347 | 0.001667629 | ADAM15    | 3 | STAB1_LSEC |
| 413 | 4.22E-11 | -0.261843482 | 0.231 | 0.474 | 9.20E-07    | LAP3      | 3 | STAB1_LSEC |
| 414 | 2.01E-10 | -0.262534831 | 0.136 | 0.337 | 4.38E-06    | ADIPOR1   | 3 | STAB1_LSEC |
| 415 | 3.13E-12 | -0.263221375 | 0.833 | 0.949 | 6.83E-08    | RPS2      | 3 | STAB1_LSEC |
| 416 | 2.31E-09 | -0.26335753  | 0.293 | 0.531 | 5.03E-05    | EIF3M     | 3 | STAB1_LSEC |
| 417 | 1.41E-08 | -0.264098179 | 0.139 | 0.317 | 0.000308006 | RFK       | 3 | STAB1_LSEC |
| 418 | 1.26E-11 | -0.267516029 | 0.347 | 0.627 | 2.74E-07    | TMED2     | 3 | STAB1_LSEC |

|     |          |              |       |       |             |            |   |            |
|-----|----------|--------------|-------|-------|-------------|------------|---|------------|
| 419 | 2.43E-10 | -0.269371191 | 0.395 | 0.658 | 5.31E-06    | GNB2       | 3 | STAB1_LSEC |
| 420 | 3.78E-11 | -0.269547758 | 0.279 | 0.557 | 8.24E-07    | RNH1       | 3 | STAB1_LSEC |
| 421 | 1.33E-10 | -0.269883379 | 0.435 | 0.716 | 2.90E-06    | TPM3       | 3 | STAB1_LSEC |
| 422 | 1.40E-11 | -0.270233164 | 0.177 | 0.425 | 3.06E-07    | PSMD8      | 3 | STAB1_LSEC |
| 423 | 3.96E-10 | -0.270421008 | 0.354 | 0.615 | 8.63E-06    | NRN1       | 3 | STAB1_LSEC |
| 424 | 1.10E-10 | -0.270429205 | 0.293 | 0.56  | 2.39E-06    | CAP1       | 3 | STAB1_LSEC |
| 425 | 1.49E-09 | -0.27092875  | 0.568 | 0.803 | 3.25E-05    | YBX1       | 3 | STAB1_LSEC |
| 426 | 1.04E-09 | -0.271018471 | 0.408 | 0.679 | 2.27E-05    | GABARAPL2  | 3 | STAB1_LSEC |
| 427 | 4.21E-11 | -0.271363041 | 0.177 | 0.413 | 9.18E-07    | LHFP       | 3 | STAB1_LSEC |
| 428 | 4.27E-12 | -0.271468478 | 0.173 | 0.418 | 9.32E-08    | RNF11      | 3 | STAB1_LSEC |
| 429 | 5.75E-11 | -0.272148756 | 0.367 | 0.65  | 1.25E-06    | SLC25A5    | 3 | STAB1_LSEC |
| 430 | 1.40E-11 | -0.273015069 | 0.146 | 0.376 | 3.05E-07    | RRAGA      | 3 | STAB1_LSEC |
| 431 | 6.46E-11 | -0.2734266   | 0.459 | 0.737 | 1.41E-06    | WDR83OS    | 3 | STAB1_LSEC |
| 432 | 2.44E-11 | -0.274048303 | 0.197 | 0.438 | 5.33E-07    | GHITM      | 3 | STAB1_LSEC |
| 433 | 8.10E-08 | -0.274470124 | 0.656 | 0.844 | 0.001765943 | RHOC       | 3 | STAB1_LSEC |
| 434 | 4.07E-10 | -0.274508842 | 0.31  | 0.559 | 8.88E-06    | PGK1       | 3 | STAB1_LSEC |
| 435 | 9.05E-11 | -0.275042184 | 0.32  | 0.585 | 1.97E-06    | WARS       | 3 | STAB1_LSEC |
| 436 | 2.24E-08 | -0.275774042 | 0.507 | 0.737 | 0.000488238 | HYAL2      | 3 | STAB1_LSEC |
| 437 | 3.88E-10 | -0.277801502 | 0.35  | 0.615 | 8.47E-06    | HERPUD1    | 3 | STAB1_LSEC |
| 438 | 6.31E-11 | -0.277832101 | 0.245 | 0.505 | 1.38E-06    | CHMP5      | 3 | STAB1_LSEC |
| 439 | 1.07E-10 | -0.278133251 | 0.449 | 0.717 | 2.32E-06    | ARPC2      | 3 | STAB1_LSEC |
| 440 | 1.39E-15 | -0.279152198 | 0.874 | 0.984 | 3.04E-11    | RPS4X      | 3 | STAB1_LSEC |
| 441 | 1.17E-21 | -0.281357356 | 0.966 | 0.997 | 2.55E-17    | AC090498.1 | 3 | STAB1_LSEC |
| 442 | 7.80E-08 | -0.281530731 | 0.527 | 0.763 | 0.001700845 | TPI1       | 3 | STAB1_LSEC |
| 443 | 2.25E-10 | -0.281822226 | 0.126 | 0.33  | 4.90E-06    | PSMD4      | 3 | STAB1_LSEC |
| 444 | 3.67E-09 | -0.282238134 | 0.286 | 0.51  | 8.01E-05    | SOX7       | 3 | STAB1_LSEC |
| 445 | 9.86E-12 | -0.283648375 | 0.194 | 0.446 | 2.15E-07    | RAB1B      | 3 | STAB1_LSEC |
| 446 | 6.21E-11 | -0.283843084 | 0.224 | 0.471 | 1.35E-06    | EIF2S3     | 3 | STAB1_LSEC |
| 447 | 2.78E-13 | -0.28548803  | 0.116 | 0.355 | 6.06E-09    | MAPK1IP1L  | 3 | STAB1_LSEC |
| 448 | 1.77E-08 | -0.285955216 | 0.531 | 0.738 | 0.000386305 | S100A16    | 3 | STAB1_LSEC |
| 449 | 5.61E-12 | -0.287278976 | 0.197 | 0.448 | 1.22E-07    | RAP1A      | 3 | STAB1_LSEC |
| 450 | 4.44E-07 | -0.288532029 | 0.646 | 0.797 | 0.009688477 | GYPC       | 3 | STAB1_LSEC |
| 451 | 9.69E-11 | -0.289338511 | 0.517 | 0.752 | 2.11E-06    | SLC25A3    | 3 | STAB1_LSEC |
| 452 | 5.54E-11 | -0.289602967 | 0.303 | 0.566 | 1.21E-06    | CYB5R3     | 3 | STAB1_LSEC |
| 453 | 3.19E-12 | -0.293471835 | 0.578 | 0.826 | 6.96E-08    | SLC25A6    | 3 | STAB1_LSEC |
| 454 | 2.26E-14 | -0.293731949 | 0.18  | 0.461 | 4.94E-10    | ANXA11     | 3 | STAB1_LSEC |
| 455 | 2.59E-13 | -0.294123959 | 0.269 | 0.56  | 5.64E-09    | SERINC3    | 3 | STAB1_LSEC |
| 456 | 7.24E-13 | -0.29553109  | 0.327 | 0.616 | 1.58E-08    | ERGIC3     | 3 | STAB1_LSEC |
| 457 | 9.21E-08 | -0.295637373 | 0.51  | 0.741 | 0.002007826 | DNAJB1     | 3 | STAB1_LSEC |
| 458 | 3.35E-11 | -0.297712526 | 0.187 | 0.419 | 7.31E-07    | TMEM109    | 3 | STAB1_LSEC |
| 459 | 6.85E-21 | -0.298954597 | 0.901 | 0.986 | 1.49E-16    | RPL15      | 3 | STAB1_LSEC |
| 460 | 1.64E-13 | -0.299192956 | 0.35  | 0.645 | 3.57E-09    | CSDE1      | 3 | STAB1_LSEC |
| 461 | 2.13E-10 | -0.299754636 | 0.286 | 0.533 | 4.65E-06    | UBE2J1     | 3 | STAB1_LSEC |
| 462 | 1.17E-11 | -0.301515113 | 0.156 | 0.389 | 2.56E-07    | PSMB2      | 3 | STAB1_LSEC |
| 463 | 4.89E-10 | -0.301533845 | 0.714 | 0.889 | 1.07E-05    | HSP90AB1   | 3 | STAB1_LSEC |
| 464 | 2.37E-11 | -0.30324508  | 0.293 | 0.552 | 5.17E-07    | ARPC1B     | 3 | STAB1_LSEC |
| 465 | 3.44E-09 | -0.30792635  | 0.265 | 0.499 | 7.49E-05    | ATP1A1     | 3 | STAB1_LSEC |
| 466 | 7.56E-14 | -0.308094678 | 0.762 | 0.925 | 1.65E-09    | RPL10A     | 3 | STAB1_LSEC |
| 467 | 4.42E-09 | -0.309671283 | 0.66  | 0.815 | 9.64E-05    | PLPP3      | 3 | STAB1_LSEC |
| 468 | 9.27E-17 | -0.310788889 | 0.833 | 0.959 | 2.02E-12    | RPLP0      | 3 | STAB1_LSEC |
| 469 | 7.36E-18 | -0.311265715 | 0.85  | 0.973 | 1.61E-13    | RPL17      | 3 | STAB1_LSEC |
| 470 | 2.32E-08 | -0.311609357 | 0.235 | 0.433 | 0.000506359 | MATN2      | 3 | STAB1_LSEC |
| 471 | 3.44E-13 | -0.316972904 | 0.272 | 0.546 | 7.50E-09    | BZW1       | 3 | STAB1_LSEC |
| 472 | 1.57E-08 | -0.317125742 | 0.116 | 0.285 | 0.000341496 | LTBP4      | 3 | STAB1_LSEC |
| 473 | 4.78E-13 | -0.31755422  | 0.541 | 0.791 | 1.04E-08    | LAPTM4A    | 3 | STAB1_LSEC |
| 474 | 1.29E-14 | -0.317932445 | 0.344 | 0.648 | 2.81E-10    | ATP5B      | 3 | STAB1_LSEC |
| 475 | 8.20E-12 | -0.318271854 | 0.697 | 0.883 | 1.79E-07    | BST2       | 3 | STAB1_LSEC |
| 476 | 5.18E-16 | -0.319324127 | 0.714 | 0.921 | 1.13E-11    | EEF1D      | 3 | STAB1_LSEC |
| 477 | 3.82E-13 | -0.323473568 | 0.422 | 0.705 | 8.34E-09    | VDAC2      | 3 | STAB1_LSEC |
| 478 | 3.87E-28 | -0.327618775 | 0.983 | 0.999 | 8.44E-24    | RPL10      | 3 | STAB1_LSEC |
| 479 | 8.97E-15 | -0.331225988 | 0.429 | 0.719 | 1.96E-10    | YWHAZ      | 3 | STAB1_LSEC |
| 480 | 2.08E-14 | -0.33193103  | 0.745 | 0.912 | 4.53E-10    | IGFBP4     | 3 | STAB1_LSEC |
| 481 | 1.76E-09 | -0.332740068 | 0.551 | 0.785 | 3.84E-05    | SNHG7      | 3 | STAB1_LSEC |
| 482 | 1.44E-22 | -0.333229793 | 0.881 | 0.984 | 3.13E-18    | RPS3       | 3 | STAB1_LSEC |
| 483 | 2.47E-08 | -0.334705462 | 0.129 | 0.298 | 0.000537909 | FAM107A    | 3 | STAB1_LSEC |
| 484 | 1.16E-08 | -0.335700411 | 0.697 | 0.842 | 0.000253145 | SPARC      | 3 | STAB1_LSEC |
| 485 | 8.92E-12 | -0.33702413  | 0.605 | 0.829 | 1.95E-07    | CNN3       | 3 | STAB1_LSEC |
| 486 | 2.54E-14 | -0.337174818 | 0.49  | 0.759 | 5.54E-10    | TPM4       | 3 | STAB1_LSEC |
| 487 | 2.22E-22 | -0.337462511 | 0.847 | 0.979 | 4.85E-18    | GNB2L1     | 3 | STAB1_LSEC |
| 488 | 1.87E-13 | -0.338194835 | 0.687 | 0.91  | 4.09E-09    | MYL12B     | 3 | STAB1_LSEC |

|     |          |              |       |       |             |         |   |            |
|-----|----------|--------------|-------|-------|-------------|---------|---|------------|
| 489 | 1.63E-12 | -0.341098608 | 0.371 | 0.647 | 3.56E-08    | EMCN    | 3 | STAB1_LSEC |
| 490 | 1.05E-19 | -0.343148849 | 0.844 | 0.967 | 2.28E-15    | RPL5    | 3 | STAB1_LSEC |
| 491 | 3.68E-14 | -0.344829135 | 0.231 | 0.52  | 8.03E-10    | VAT1    | 3 | STAB1_LSEC |
| 492 | 4.06E-08 | -0.345249015 | 0.279 | 0.484 | 0.000886088 | PNP     | 3 | STAB1_LSEC |
| 493 | 6.65E-13 | -0.3480834   | 0.269 | 0.545 | 1.45E-08    | GINM1   | 3 | STAB1_LSEC |
| 494 | 9.03E-19 | -0.350133809 | 0.813 | 0.957 | 1.97E-14    | RPL21   | 3 | STAB1_LSEC |
| 495 | 1.57E-12 | -0.3510566   | 0.595 | 0.809 | 3.42E-08    | ANXA2   | 3 | STAB1_LSEC |
| 496 | 2.39E-16 | -0.352832624 | 0.653 | 0.883 | 5.21E-12    | SDCBP   | 3 | STAB1_LSEC |
| 497 | 4.19E-15 | -0.353991266 | 0.493 | 0.78  | 9.13E-11    | PTGES3  | 3 | STAB1_LSEC |
| 498 | 4.56E-11 | -0.354204296 | 0.395 | 0.658 | 9.95E-07    | ESAM    | 3 | STAB1_LSEC |
| 499 | 6.67E-25 | -0.354939858 | 0.925 | 0.988 | 1.46E-20    | GAPDH   | 3 | STAB1_LSEC |
| 500 | 2.54E-11 | -0.356712928 | 0.197 | 0.432 | 5.53E-07    | LRRC32  | 3 | STAB1_LSEC |
| 501 | 6.89E-14 | -0.357222493 | 0.459 | 0.739 | 1.50E-09    | GUK1    | 3 | STAB1_LSEC |
| 502 | 1.95E-10 | -0.357612314 | 0.463 | 0.714 | 4.25E-06    | CLEC14A | 3 | STAB1_LSEC |
| 503 | 4.72E-23 | -0.359774017 | 0.881 | 0.971 | 1.03E-18    | HLA-E   | 3 | STAB1_LSEC |
| 504 | 1.55E-16 | -0.359887475 | 0.388 | 0.717 | 3.38E-12    | ARF1    | 3 | STAB1_LSEC |
| 505 | 3.16E-11 | -0.361264918 | 0.456 | 0.723 | 6.90E-07    | CRIP2   | 3 | STAB1_LSEC |
| 506 | 2.25E-13 | -0.363287237 | 0.507 | 0.787 | 4.90E-09    | EIF3K   | 3 | STAB1_LSEC |
| 507 | 7.15E-14 | -0.365738955 | 0.306 | 0.594 | 1.56E-09    | TUBB    | 3 | STAB1_LSEC |
| 508 | 2.03E-14 | -0.370205171 | 0.327 | 0.619 | 4.43E-10    | EIF3L   | 3 | STAB1_LSEC |
| 509 | 3.14E-13 | -0.370545522 | 0.463 | 0.743 | 6.85E-09    | DSTN    | 3 | STAB1_LSEC |
| 510 | 1.89E-22 | -0.371589758 | 0.816 | 0.927 | 4.13E-18    | PCBP2   | 3 | STAB1_LSEC |
| 511 | 4.19E-14 | -0.376215685 | 0.503 | 0.775 | 9.14E-10    | MORF4L1 | 3 | STAB1_LSEC |
| 512 | 5.84E-16 | -0.376477879 | 0.306 | 0.608 | 1.27E-11    | BNIP3L  | 3 | STAB1_LSEC |
| 513 | 2.75E-16 | -0.379012841 | 0.201 | 0.493 | 5.99E-12    | ARPC1A  | 3 | STAB1_LSEC |
| 514 | 4.42E-15 | -0.37980162  | 0.272 | 0.577 | 9.63E-11    | CLIC4   | 3 | STAB1_LSEC |
| 515 | 8.87E-16 | -0.381606862 | 0.364 | 0.668 | 1.93E-11    | CNBP    | 3 | STAB1_LSEC |
| 516 | 3.75E-19 | -0.384588595 | 0.68  | 0.879 | 8.17E-15    | PABPC1  | 3 | STAB1_LSEC |
| 517 | 3.58E-18 | -0.384859461 | 0.85  | 0.972 | 7.81E-14    | ACTB    | 3 | STAB1_LSEC |
| 518 | 1.92E-30 | -0.386438706 | 0.901 | 0.984 | 4.19E-26    | RPL8    | 3 | STAB1_LSEC |
| 519 | 7.62E-27 | -0.386895574 | 0.864 | 0.98  | 1.66E-22    | RPL3    | 3 | STAB1_LSEC |
| 520 | 7.19E-12 | -0.392855025 | 0.299 | 0.573 | 1.57E-07    | LMNA    | 3 | STAB1_LSEC |
| 521 | 6.16E-18 | -0.394069775 | 0.357 | 0.671 | 1.34E-13    | EIF4B   | 3 | STAB1_LSEC |
| 522 | 3.48E-16 | -0.397816809 | 0.469 | 0.771 | 7.59E-12    | PCBP1   | 3 | STAB1_LSEC |
| 523 | 1.01E-07 | -0.39938034  | 0.241 | 0.424 | 0.002194731 | HSPH1   | 3 | STAB1_LSEC |
| 524 | 9.74E-19 | -0.40295415  | 0.796 | 0.938 | 2.12E-14    | ACTG1   | 3 | STAB1_LSEC |
| 525 | 4.64E-18 | -0.404062552 | 0.327 | 0.645 | 1.01E-13    | GDI2    | 3 | STAB1_LSEC |
| 526 | 4.51E-10 | -0.404767454 | 0.551 | 0.762 | 9.83E-06    | EPAS1   | 3 | STAB1_LSEC |
| 527 | 1.11E-16 | -0.406515311 | 0.561 | 0.827 | 2.41E-12    | EIF3E   | 3 | STAB1_LSEC |
| 528 | 3.15E-17 | -0.407331158 | 0.299 | 0.61  | 6.87E-13    | CRTAP   | 3 | STAB1_LSEC |
| 529 | 2.27E-15 | -0.408868409 | 0.677 | 0.87  | 4.94E-11    | ALDOA   | 3 | STAB1_LSEC |
| 530 | 8.43E-09 | -0.408973527 | 0.446 | 0.68  | 0.000183794 | RAMP2   | 3 | STAB1_LSEC |
| 531 | 1.54E-28 | -0.409906945 | 0.837 | 0.977 | 3.36E-24    | RPS10   | 3 | STAB1_LSEC |
| 532 | 1.00E-17 | -0.413468622 | 0.636 | 0.889 | 2.19E-13    | FKBP1A  | 3 | STAB1_LSEC |
| 533 | 2.01E-06 | -0.41380416  | 0.255 | 0.411 | 0.043816053 | ADIRF   | 3 | STAB1_LSEC |
| 534 | 9.37E-19 | -0.419940825 | 0.442 | 0.77  | 2.04E-14    | CAPZA2  | 3 | STAB1_LSEC |
| 535 | 5.45E-18 | -0.424675354 | 0.347 | 0.67  | 1.19E-13    | HNRNPF  | 3 | STAB1_LSEC |
| 536 | 8.72E-09 | -0.427225577 | 0.323 | 0.528 | 0.00019024  | GJA4    | 3 | STAB1_LSEC |
| 537 | 7.78E-11 | -0.434363387 | 0.296 | 0.55  | 1.70E-06    | GLUL    | 3 | STAB1_LSEC |
| 538 | 1.32E-22 | -0.443064995 | 0.673 | 0.888 | 2.89E-18    | RPSA    | 3 | STAB1_LSEC |
| 539 | 1.80E-06 | -0.469494528 | 0.565 | 0.744 | 0.039278921 | CD74    | 3 | STAB1_LSEC |
| 540 | 4.59E-24 | -0.471024117 | 0.65  | 0.889 | 1.00E-19    | RHOA    | 3 | STAB1_LSEC |
| 541 | 2.49E-18 | -0.476667571 | 0.361 | 0.681 | 5.43E-14    | RAB5C   | 3 | STAB1_LSEC |
| 542 | 6.30E-24 | -0.478350343 | 0.537 | 0.83  | 1.37E-19    | EEF1G   | 3 | STAB1_LSEC |
| 543 | 1.60E-30 | -0.480417241 | 0.759 | 0.95  | 3.49E-26    | RPS5    | 3 | STAB1_LSEC |
| 544 | 3.57E-12 | -0.48210454  | 0.306 | 0.551 | 7.78E-08    | LITAF   | 3 | STAB1_LSEC |
| 545 | 9.04E-21 | -0.495220002 | 0.367 | 0.697 | 1.97E-16    | CAV1    | 3 | STAB1_LSEC |
| 546 | 1.29E-11 | -0.496917932 | 0.252 | 0.501 | 2.82E-07    | BAG3    | 3 | STAB1_LSEC |
| 547 | 6.52E-58 | -0.510113832 | 0.98  | 0.999 | 1.42E-53    | EEF1A1  | 3 | STAB1_LSEC |
| 548 | 2.25E-16 | -0.518457306 | 0.517 | 0.747 | 4.90E-12    | CDKN1A  | 3 | STAB1_LSEC |
| 549 | 6.83E-07 | -0.52621794  | 0.221 | 0.385 | 0.014900479 | MGP     | 3 | STAB1_LSEC |
| 550 | 2.83E-11 | -0.536213294 | 0.565 | 0.802 | 6.18E-07    | PLPP1   | 3 | STAB1_LSEC |
| 551 | 4.22E-31 | -0.538669713 | 0.69  | 0.908 | 9.19E-27    | EEF2    | 3 | STAB1_LSEC |
| 552 | 4.67E-29 | -0.561138369 | 0.486 | 0.834 | 1.02E-24    | CCNI    | 3 | STAB1_LSEC |
| 553 | 4.92E-19 | -0.596280645 | 0.483 | 0.755 | 1.07E-14    | PECAM1  | 3 | STAB1_LSEC |
| 554 | 2.32E-30 | -0.6473466   | 0.588 | 0.877 | 5.05E-26    | HSPA8   | 3 | STAB1_LSEC |
| 555 | 5.07E-20 | -0.65776792  | 0.33  | 0.649 | 1.11E-15    | TAGLN2  | 3 | STAB1_LSEC |
| 556 | 3.02E-10 | -0.676570019 | 0.17  | 0.368 | 6.59E-06    | VWF     | 3 | STAB1_LSEC |
| 557 | 2.67E-07 | -0.687680912 | 0.459 | 0.631 | 0.005832914 | S100A6  | 3 | STAB1_LSEC |
| 558 | 8.37E-14 | -0.691620684 | 0.35  | 0.63  | 1.82E-09    | GSN     | 3 | STAB1_LSEC |

|     |           |              |       |       |             |          |   |            |
|-----|-----------|--------------|-------|-------|-------------|----------|---|------------|
| 559 | 1.46E-15  | -0.80425011  | 0.701 | 0.821 | 3.19E-11    | VIM      | 3 | STAB1_LSEC |
| 560 | 1.41E-14  | -0.825817351 | 0.17  | 0.413 | 3.07E-10    | PLVAP    | 3 | STAB1_LSEC |
| 561 | 6.93E-08  | -0.896558431 | 0.18  | 0.324 | 0.001512183 | SPARCL1  | 3 | STAB1_LSEC |
| 562 | 2.42E-166 | 2.257600283  | 0.982 | 0.239 | 5.28E-162   | MGP      | 4 | MGP_VEC    |
| 563 | 3.20E-134 | 1.763118842  | 0.915 | 0.284 | 6.98E-130   | ADIRF    | 4 | MGP_VEC    |
| 564 | 8.30E-84  | 1.701193889  | 0.695 | 0.207 | 1.81E-79    | CLU      | 4 | MGP_VEC    |
| 565 | 4.13E-18  | 1.28534918   | 0.433 | 0.214 | 9.01E-14    | MT1M     | 4 | MGP_VEC    |
| 566 | 3.83E-131 | 1.264592761  | 0.539 | 0.036 | 8.36E-127   | CPE      | 4 | MGP_VEC    |
| 567 | 9.32E-30  | 1.255133095  | 0.574 | 0.265 | 2.03E-25    | MT1E     | 4 | MGP_VEC    |
| 568 | 2.70E-96  | 1.195320382  | 0.433 | 0.034 | 5.89E-92    | FN1      | 4 | MGP_VEC    |
| 569 | 1.49E-98  | 1.192746269  | 0.996 | 0.764 | 3.24E-94    | VIM      | 4 | MGP_VEC    |
| 570 | 2.18E-100 | 1.170373424  | 0.833 | 0.199 | 4.75E-96    | SPARCL1  | 4 | MGP_VEC    |
| 571 | 1.46E-105 | 1.147321415  | 0.734 | 0.131 | 3.18E-101   | AQP1     | 4 | MGP_VEC    |
| 572 | 2.09E-39  | 1.133747024  | 0.457 | 0.147 | 4.56E-35    | CD320    | 4 | MGP_VEC    |
| 573 | 6.49E-38  | 1.09210042   | 0.798 | 0.505 | 1.42E-33    | CXCL2    | 4 | MGP_VEC    |
| 574 | 2.86E-38  | 1.063832721  | 0.362 | 0.09  | 6.24E-34    | HES4     | 4 | MGP_VEC    |
| 575 | 9.16E-79  | 1.056009979  | 0.78  | 0.25  | 2.00E-74    | VWF      | 4 | MGP_VEC    |
| 576 | 2.49E-23  | 1.036665978  | 0.188 | 0.036 | 5.43E-19    | IL6      | 4 | MGP_VEC    |
| 577 | 1.22E-63  | 1.028448548  | 0.624 | 0.187 | 2.67E-59    | LTBP4    | 4 | MGP_VEC    |
| 578 | 4.07E-32  | 0.951842932  | 0.372 | 0.106 | 8.88E-28    | ANXA1    | 4 | MGP_VEC    |
| 579 | 5.39E-19  | 0.942125392  | 0.521 | 0.303 | 1.18E-14    | ANGPTL4  | 4 | MGP_VEC    |
| 580 | 1.11E-48  | 0.876505913  | 0.734 | 0.337 | 2.42E-44    | MATN2    | 4 | MGP_VEC    |
| 581 | 1.34E-48  | 0.871673524  | 0.883 | 0.549 | 2.91E-44    | S100A6   | 4 | MGP_VEC    |
| 582 | 3.96E-21  | 0.86909956   | 0.706 | 0.493 | 8.64E-17    | LMNA     | 4 | MGP_VEC    |
| 583 | 2.07E-37  | 0.844652395  | 0.794 | 0.586 | 4.52E-33    | SRPX     | 4 | MGP_VEC    |
| 584 | 9.30E-27  | 0.803858273  | 0.745 | 0.452 | 2.03E-22    | EMP1     | 4 | MGP_VEC    |
| 585 | 1.43E-09  | 0.790104105  | 0.929 | 0.873 | 3.12E-05    | MT2A     | 4 | MGP_VEC    |
| 586 | 1.23E-63  | 0.759933364  | 0.323 | 0.03  | 2.69E-59    | FBLN2    | 4 | MGP_VEC    |
| 587 | 1.04E-10  | 0.742720671  | 0.262 | 0.122 | 2.28E-06    | MT1A     | 4 | MGP_VEC    |
| 588 | 5.32E-07  | 0.723409454  | 0.55  | 0.435 | 0.011592992 | MT1X     | 4 | MGP_VEC    |
| 589 | 3.60E-14  | 0.718349429  | 0.408 | 0.218 | 7.85E-10    | VCAM1    | 4 | MGP_VEC    |
| 590 | 1.43E-45  | 0.715285118  | 0.255 | 0.028 | 3.12E-41    | NTS      | 4 | MGP_VEC    |
| 591 | 2.49E-22  | 0.711710354  | 0.319 | 0.106 | 5.43E-18    | STC1     | 4 | MGP_VEC    |
| 592 | 2.75E-33  | 0.704796796  | 0.543 | 0.239 | 5.99E-29    | RFK      | 4 | MGP_VEC    |
| 593 | 1.73E-48  | 0.677725898  | 0.596 | 0.186 | 3.78E-44    | SLCO2A1  | 4 | MGP_VEC    |
| 594 | 7.63E-50  | 0.677004069  | 0.968 | 0.791 | 1.66E-45    | IFITM1   | 4 | MGP_VEC    |
| 595 | 8.58E-34  | 0.676162676  | 0.872 | 0.644 | 1.87E-29    | C7       | 4 | MGP_VEC    |
| 596 | 3.25E-32  | 0.671046716  | 0.298 | 0.065 | 7.08E-28    | FABP5    | 4 | MGP_VEC    |
| 597 | 2.75E-50  | 0.670462594  | 0.33  | 0.051 | 6.01E-46    | BMX      | 4 | MGP_VEC    |
| 598 | 1.84E-16  | 0.667362724  | 0.174 | 0.043 | 4.01E-12    | MCTP1    | 4 | MGP_VEC    |
| 599 | 6.90E-33  | 0.661635304  | 0.844 | 0.639 | 1.50E-28    | CLEC14A  | 4 | MGP_VEC    |
| 600 | 3.16E-57  | 0.657021783  | 0.305 | 0.032 | 6.89E-53    | PLAC9    | 4 | MGP_VEC    |
| 601 | 2.88E-66  | 0.651122055  | 0.301 | 0.022 | 6.28E-62    | MPZL2    | 4 | MGP_VEC    |
| 602 | 5.42E-17  | 0.650014868  | 0.447 | 0.231 | 1.18E-12    | ATP13A3  | 4 | MGP_VEC    |
| 603 | 1.42E-46  | 0.649798552  | 0.716 | 0.307 | 3.10E-42    | PLVAP    | 4 | MGP_VEC    |
| 604 | 2.86E-11  | 0.648538105  | 0.418 | 0.251 | 6.23E-07    | ADAMTS9  | 4 | MGP_VEC    |
| 605 | 6.38E-31  | 0.646182385  | 0.351 | 0.103 | 1.39E-26    | SCGB3A1  | 4 | MGP_VEC    |
| 606 | 1.24E-21  | 0.633159179  | 0.433 | 0.194 | 2.71E-17    | COL8A1   | 4 | MGP_VEC    |
| 607 | 1.06E-18  | 0.632110778  | 0.66  | 0.439 | 2.32E-14    | SOX4     | 4 | MGP_VEC    |
| 608 | 3.52E-42  | 0.627846094  | 0.277 | 0.042 | 7.67E-38    | CDH11    | 4 | MGP_VEC    |
| 609 | 4.35E-47  | 0.621021356  | 0.947 | 0.827 | 9.48E-43    | FKBP1A   | 4 | MGP_VEC    |
| 610 | 3.05E-20  | 0.620070245  | 0.741 | 0.509 | 6.65E-16    | ADAMTS1  | 4 | MGP_VEC    |
| 611 | 1.25E-30  | 0.59987093   | 0.954 | 0.757 | 2.73E-26    | RNASE1   | 4 | MGP_VEC    |
| 612 | 5.06E-34  | 0.598322816  | 0.181 | 0.019 | 1.10E-29    | CYP1B1   | 4 | MGP_VEC    |
| 613 | 7.60E-24  | 0.593518889  | 0.628 | 0.391 | 1.66E-19    | GAS6     | 4 | MGP_VEC    |
| 614 | 1.35E-26  | 0.591971895  | 0.727 | 0.476 | 2.95E-22    | MMRN2    | 4 | MGP_VEC    |
| 615 | 2.76E-45  | 0.590500164  | 0.535 | 0.15  | 6.03E-41    | CD34     | 4 | MGP_VEC    |
| 616 | 3.13E-25  | 0.590297786  | 0.706 | 0.452 | 6.83E-21    | CDC42EP3 | 4 | MGP_VEC    |
| 617 | 2.81E-27  | 0.589515933  | 0.989 | 0.903 | 6.13E-23    | TM4SF1   | 4 | MGP_VEC    |
| 618 | 6.08E-37  | 0.585039577  | 0.968 | 0.898 | 1.33E-32    | IGFBP7   | 4 | MGP_VEC    |
| 619 | 9.17E-08  | 0.583541507  | 0.557 | 0.439 | 0.00199879  | C11orf96 | 4 | MGP_VEC    |
| 620 | 8.24E-24  | 0.576297486  | 0.277 | 0.081 | 1.80E-19    | LEPR     | 4 | MGP_VEC    |
| 621 | 1.28E-17  | 0.574872961  | 0.709 | 0.542 | 2.80E-13    | ZFP36L2  | 4 | MGP_VEC    |
| 622 | 6.54E-36  | 0.564126078  | 0.28  | 0.051 | 1.43E-31    | PTGS1    | 4 | MGP_VEC    |
| 623 | 6.72E-16  | 0.563635469  | 0.443 | 0.236 | 1.46E-11    | PLEC     | 4 | MGP_VEC    |
| 624 | 3.12E-54  | 0.558043232  | 0.23  | 0.014 | 6.80E-50    | CGNL1    | 4 | MGP_VEC    |
| 625 | 9.99E-28  | 0.556905897  | 0.45  | 0.179 | 2.18E-23    | SNCG     | 4 | MGP_VEC    |
| 626 | 1.59E-19  | 0.554813292  | 0.656 | 0.423 | 3.46E-15    | ATP1A1   | 4 | MGP_VEC    |
| 627 | 2.65E-32  | 0.554638253  | 0.95  | 0.786 | 5.79E-28    | CD9      | 4 | MGP_VEC    |
| 628 | 5.75E-25  | 0.552823354  | 0.851 | 0.704 | 1.25E-20    | TGM2     | 4 | MGP_VEC    |

|     |          |             |       |       |             |               |   |         |
|-----|----------|-------------|-------|-------|-------------|---------------|---|---------|
| 629 | 5.92E-38 | 0.547992281 | 0.27  | 0.045 | 1.29E-33    | MYOF          | 4 | MGP_VEC |
| 630 | 3.22E-11 | 0.547103809 | 0.589 | 0.423 | 7.02E-07    | PNP           | 4 | MGP_VEC |
| 631 | 1.79E-11 | 0.542104105 | 0.227 | 0.091 | 3.91E-07    | CTGF          | 4 | MGP_VEC |
| 632 | 1.95E-31 | 0.531282761 | 0.355 | 0.102 | 4.25E-27    | FBLIM1        | 4 | MGP_VEC |
| 633 | 3.30E-29 | 0.529659069 | 0.337 | 0.094 | 7.19E-25    | ASRGL1        | 4 | MGP_VEC |
| 634 | 3.88E-13 | 0.52598969  | 0.823 | 0.73  | 8.46E-09    | DDIT4         | 4 | MGP_VEC |
| 635 | 1.33E-26 | 0.525181551 | 0.592 | 0.304 | 2.91E-22    | JAM2          | 4 | MGP_VEC |
| 636 | 4.98E-11 | 0.522376857 | 0.613 | 0.455 | 1.09E-06    | MYADM         | 4 | MGP_VEC |
| 637 | 2.81E-44 | 0.514147688 | 0.145 | 0.003 | 6.13E-40    | OTC           | 4 | MGP_VEC |
| 638 | 1.21E-12 | 0.513801983 | 0.397 | 0.227 | 2.64E-08    | GADD45A       | 4 | MGP_VEC |
| 639 | 2.60E-36 | 0.51081479  | 0.184 | 0.018 | 5.66E-32    | SGMS2         | 4 | MGP_VEC |
| 640 | 1.17E-20 | 0.510781754 | 0.539 | 0.298 | 2.56E-16    | EMP2          | 4 | MGP_VEC |
| 641 | 4.36E-17 | 0.507726418 | 0.521 | 0.293 | 9.50E-13    | NDRG1         | 4 | MGP_VEC |
| 642 | 1.06E-09 | 0.499431994 | 0.184 | 0.074 | 2.32E-05    | BIRC3         | 4 | MGP_VEC |
| 643 | 4.37E-07 | 0.498810251 | 0.404 | 0.281 | 0.009519231 | PKIG          | 4 | MGP_VEC |
| 644 | 1.62E-17 | 0.496864048 | 0.532 | 0.316 | 3.52E-13    | CTNNAL1       | 4 | MGP_VEC |
| 645 | 6.38E-40 | 0.491461056 | 0.16  | 0.008 | 1.39E-35    | ALDH1A2       | 4 | MGP_VEC |
| 646 | 2.67E-26 | 0.491142097 | 0.294 | 0.081 | 5.82E-22    | DPYSL3        | 4 | MGP_VEC |
| 647 | 2.44E-08 | 0.490095736 | 0.472 | 0.344 | 0.000532835 | MAT2A         | 4 | MGP_VEC |
| 648 | 4.82E-25 | 0.489130066 | 0.174 | 0.028 | 1.05E-20    | PDLIM4        | 4 | MGP_VEC |
| 649 | 2.81E-26 | 0.486941521 | 0.801 | 0.557 | 6.12E-22    | TAGLN2        | 4 | MGP_VEC |
| 650 | 1.46E-14 | 0.486134347 | 0.603 | 0.429 | 3.19E-10    | YBX3          | 4 | MGP_VEC |
| 651 | 8.84E-31 | 0.485712675 | 0.248 | 0.048 | 1.93E-26    | PLCXD3        | 4 | MGP_VEC |
| 652 | 1.17E-21 | 0.483413898 | 0.376 | 0.15  | 2.54E-17    | BCR           | 4 | MGP_VEC |
| 653 | 7.76E-15 | 0.483196546 | 0.887 | 0.783 | 1.69E-10    | ID3           | 4 | MGP_VEC |
| 654 | 3.45E-22 | 0.480576779 | 0.826 | 0.639 | 7.52E-18    | HNRNPA1       | 4 | MGP_VEC |
| 655 | 1.66E-19 | 0.480221204 | 0.801 | 0.611 | 3.63E-15    | RAMP2         | 4 | MGP_VEC |
| 656 | 1.01E-14 | 0.475888671 | 0.94  | 0.844 | 2.20E-10    | ID1           | 4 | MGP_VEC |
| 657 | 8.71E-11 | 0.47443666  | 0.553 | 0.401 | 1.90E-06    | ITGA5         | 4 | MGP_VEC |
| 658 | 7.54E-12 | 0.471222678 | 0.603 | 0.477 | 1.64E-07    | TUBB4B        | 4 | MGP_VEC |
| 659 | 4.61E-19 | 0.470628793 | 0.865 | 0.741 | 1.01E-14    | ARGLU1        | 4 | MGP_VEC |
| 660 | 1.33E-15 | 0.466942104 | 0.574 | 0.358 | 2.89E-11    | LRRC32        | 4 | MGP_VEC |
| 661 | 7.07E-17 | 0.466026316 | 0.691 | 0.456 | 1.54E-12    | GJA4          | 4 | MGP_VEC |
| 662 | 6.06E-15 | 0.465366204 | 0.348 | 0.16  | 1.32E-10    | FLRT2         | 4 | MGP_VEC |
| 663 | 2.97E-34 | 0.461586772 | 0.301 | 0.065 | 6.47E-30    | DKK3          | 4 | MGP_VEC |
| 664 | 1.24E-27 | 0.458010167 | 0.337 | 0.094 | 2.71E-23    | IGFBP2        | 4 | MGP_VEC |
| 665 | 4.62E-15 | 0.4513295   | 0.429 | 0.23  | 1.01E-10    | MECOM         | 4 | MGP_VEC |
| 666 | 1.52E-08 | 0.449470715 | 0.652 | 0.545 | 0.000332071 | NR4A1         | 4 | MGP_VEC |
| 667 | 5.73E-07 | 0.446877914 | 0.45  | 0.333 | 0.012488869 | SERPINB9      | 4 | MGP_VEC |
| 668 | 4.47E-09 | 0.44547162  | 0.461 | 0.334 | 9.74E-05    | EVA1C         | 4 | MGP_VEC |
| 669 | 1.40E-26 | 0.441166394 | 0.316 | 0.091 | 3.05E-22    | ABCG2         | 4 | MGP_VEC |
| 670 | 8.34E-15 | 0.43603251  | 0.312 | 0.137 | 1.82E-10    | FOXC1         | 4 | MGP_VEC |
| 671 | 4.08E-07 | 0.434356845 | 0.511 | 0.378 | 0.008895864 | ADAMTS4       | 4 | MGP_VEC |
| 672 | 4.42E-13 | 0.429387777 | 0.688 | 0.521 | 9.63E-09    | CALM2         | 4 | MGP_VEC |
| 673 | 4.85E-10 | 0.421423508 | 0.709 | 0.626 | 1.06E-05    | SRSF7         | 4 | MGP_VEC |
| 674 | 1.15E-27 | 0.414649549 | 0.309 | 0.083 | 2.51E-23    | ABLIM1        | 4 | MGP_VEC |
| 675 | 1.35E-15 | 0.4124475   | 0.33  | 0.148 | 2.95E-11    | RP11-382A20.3 | 4 | MGP_VEC |
| 676 | 1.99E-09 | 0.411277941 | 0.422 | 0.278 | 4.34E-05    | TUBA1A        | 4 | MGP_VEC |
| 677 | 1.44E-12 | 0.408416151 | 0.248 | 0.104 | 3.14E-08    | NFATC1        | 4 | MGP_VEC |
| 678 | 2.79E-45 | 0.407772415 | 0.156 | 0.004 | 6.09E-41    | ABI3BP        | 4 | MGP_VEC |
| 679 | 4.07E-10 | 0.407671418 | 0.379 | 0.229 | 8.88E-06    | ITPR1         | 4 | MGP_VEC |
| 680 | 1.46E-20 | 0.407486601 | 0.918 | 0.798 | 3.19E-16    | SRGN          | 4 | MGP_VEC |
| 681 | 1.55E-18 | 0.407482212 | 0.472 | 0.231 | 3.38E-14    | FAM107A       | 4 | MGP_VEC |
| 682 | 8.64E-22 | 0.405128546 | 0.309 | 0.098 | 1.88E-17    | SYNPO         | 4 | MGP_VEC |
| 683 | 5.32E-19 | 0.404629909 | 0.578 | 0.339 | 1.16E-14    | STMN1         | 4 | MGP_VEC |
| 684 | 2.70E-19 | 0.402491617 | 0.801 | 0.612 | 5.89E-15    | CAV1          | 4 | MGP_VEC |
| 685 | 3.14E-11 | 0.399702297 | 0.493 | 0.338 | 6.84E-07    | TPRKB         | 4 | MGP_VEC |
| 686 | 7.85E-26 | 0.396902908 | 0.355 | 0.106 | 1.71E-21    | PALMD         | 4 | MGP_VEC |
| 687 | 2.63E-11 | 0.392951994 | 0.628 | 0.497 | 5.74E-07    | CYYR1         | 4 | MGP_VEC |
| 688 | 2.55E-16 | 0.391368462 | 0.394 | 0.196 | 5.56E-12    | F11R          | 4 | MGP_VEC |
| 689 | 5.35E-09 | 0.386013867 | 0.55  | 0.419 | 0.000116776 | MYH9          | 4 | MGP_VEC |
| 690 | 1.73E-10 | 0.383903678 | 0.319 | 0.168 | 3.76E-06    | BTG2          | 4 | MGP_VEC |
| 691 | 8.94E-15 | 0.383690615 | 0.777 | 0.631 | 1.95E-10    | PTMS          | 4 | MGP_VEC |
| 692 | 6.94E-08 | 0.383663171 | 0.787 | 0.687 | 0.001514002 | HSPA1B        | 4 | MGP_VEC |
| 693 | 5.56E-11 | 0.38039623  | 0.876 | 0.803 | 1.21E-06    | IER2          | 4 | MGP_VEC |
| 694 | 3.75E-22 | 0.378789297 | 0.245 | 0.063 | 8.18E-18    | MMP28         | 4 | MGP_VEC |
| 695 | 1.22E-06 | 0.378703894 | 0.429 | 0.32  | 0.026648255 | ADGRG1        | 4 | MGP_VEC |
| 696 | 1.02E-16 | 0.378039469 | 0.216 | 0.066 | 2.22E-12    | NFATC2        | 4 | MGP_VEC |
| 697 | 1.69E-12 | 0.376968128 | 0.493 | 0.314 | 3.69E-08    | ALDH2         | 4 | MGP_VEC |
| 698 | 1.87E-08 | 0.374030602 | 0.897 | 0.838 | 0.000407137 | JUN           | 4 | MGP_VEC |



|     |          |             |       |       |             |          |   |         |
|-----|----------|-------------|-------|-------|-------------|----------|---|---------|
| 699 | 3.59E-20 | 0.373449407 | 0.22  | 0.057 | 7.83E-16    | SLC39A14 | 4 | MGP_VEC |
| 700 | 9.39E-27 | 0.371740895 | 0.209 | 0.039 | 2.05E-22    | ATP1B2   | 4 | MGP_VEC |
| 701 | 2.13E-08 | 0.370869103 | 0.649 | 0.536 | 0.000464355 | JUND     | 4 | MGP_VEC |
| 702 | 4.21E-44 | 0.365181552 | 0.188 | 0.011 | 9.19E-40    | AR       | 4 | MGP_VEC |
| 703 | 1.64E-16 | 0.363980634 | 0.273 | 0.1   | 3.58E-12    | HSPA2    | 4 | MGP_VEC |
| 704 | 1.98E-10 | 0.363652936 | 0.908 | 0.84  | 4.33E-06    | JUNB     | 4 | MGP_VEC |
| 705 | 5.32E-11 | 0.362606575 | 0.291 | 0.138 | 1.16E-06    | FLNA     | 4 | MGP_VEC |
| 706 | 1.33E-13 | 0.36186268  | 0.858 | 0.729 | 2.90E-09    | LAPTM4A  | 4 | MGP_VEC |
| 707 | 1.18E-11 | 0.357920359 | 0.738 | 0.631 | 2.56E-07    | C12orf57 | 4 | MGP_VEC |
| 708 | 1.77E-08 | 0.357063158 | 0.323 | 0.191 | 0.000385197 | NR4A2    | 4 | MGP_VEC |
| 709 | 1.15E-15 | 0.355234083 | 0.138 | 0.03  | 2.50E-11    | CLCF1    | 4 | MGP_VEC |
| 710 | 7.24E-09 | 0.354363824 | 0.348 | 0.208 | 0.000157792 | GATA2    | 4 | MGP_VEC |
| 711 | 7.14E-07 | 0.352168346 | 0.67  | 0.58  | 0.015568919 | JMJD1C   | 4 | MGP_VEC |
| 712 | 9.43E-16 | 0.350019097 | 0.216 | 0.068 | 2.06E-11    | IGFBP6   | 4 | MGP_VEC |
| 713 | 9.45E-33 | 0.348975589 | 0.174 | 0.018 | 2.06E-28    | GJA5     | 4 | MGP_VEC |
| 714 | 4.60E-11 | 0.347829545 | 0.589 | 0.413 | 1.00E-06    | EMP3     | 4 | MGP_VEC |
| 715 | 5.48E-07 | 0.34768617  | 0.291 | 0.181 | 0.011945461 | GMD5     | 4 | MGP_VEC |
| 716 | 2.72E-07 | 0.347143884 | 0.578 | 0.459 | 0.005929962 | MDK      | 4 | MGP_VEC |
| 717 | 2.22E-07 | 0.347048797 | 0.351 | 0.223 | 0.004847921 | MAFB     | 4 | MGP_VEC |
| 718 | 3.56E-12 | 0.346677696 | 0.872 | 0.771 | 7.76E-08    | GNG5     | 4 | MGP_VEC |
| 719 | 2.51E-15 | 0.34558811  | 0.191 | 0.057 | 5.47E-11    | SMIM3    | 4 | MGP_VEC |
| 720 | 1.06E-18 | 0.344113265 | 0.826 | 0.688 | 2.31E-14    | PECAM1   | 4 | MGP_VEC |
| 721 | 3.68E-15 | 0.343244269 | 0.333 | 0.148 | 8.02E-11    | JAG1     | 4 | MGP_VEC |
| 722 | 4.61E-11 | 0.342265994 | 0.266 | 0.123 | 1.01E-06    | KLRG1    | 4 | MGP_VEC |
| 723 | 1.28E-23 | 0.34114668  | 0.858 | 0.644 | 2.80E-19    | CRIP2    | 4 | MGP_VEC |
| 724 | 1.45E-07 | 0.341063854 | 0.33  | 0.211 | 0.003171828 | PLP2     | 4 | MGP_VEC |
| 725 | 2.00E-13 | 0.340490944 | 0.816 | 0.691 | 4.35E-09    | S100A11  | 4 | MGP_VEC |
| 726 | 1.88E-08 | 0.339704525 | 0.585 | 0.452 | 0.000409818 | AHNAK    | 4 | MGP_VEC |
| 727 | 1.28E-11 | 0.336876761 | 0.777 | 0.657 | 2.78E-07    | HMG3     | 4 | MGP_VEC |
| 728 | 1.04E-16 | 0.336675335 | 0.287 | 0.108 | 2.26E-12    | OCIAD2   | 4 | MGP_VEC |
| 729 | 6.24E-08 | 0.33436661  | 0.897 | 0.827 | 0.001359982 | NFKBIA   | 4 | MGP_VEC |
| 730 | 4.62E-10 | 0.333659355 | 0.319 | 0.166 | 1.01E-05    | MALL     | 4 | MGP_VEC |
| 731 | 1.65E-13 | 0.33176366  | 0.869 | 0.755 | 3.60E-09    | ANXA2    | 4 | MGP_VEC |
| 732 | 2.91E-16 | 0.330745124 | 0.947 | 0.894 | 6.35E-12    | UBC      | 4 | MGP_VEC |
| 733 | 4.56E-08 | 0.330437562 | 0.404 | 0.265 | 0.000995185 | NAA10    | 4 | MGP_VEC |
| 734 | 1.44E-11 | 0.330381457 | 0.833 | 0.713 | 3.15E-07    | PRSS23   | 4 | MGP_VEC |
| 735 | 7.21E-08 | 0.329627438 | 0.333 | 0.197 | 0.001572619 | HEG1     | 4 | MGP_VEC |
| 736 | 9.15E-23 | 0.327889372 | 0.206 | 0.044 | 2.00E-18    | PTGIS    | 4 | MGP_VEC |
| 737 | 4.99E-09 | 0.325438213 | 0.277 | 0.148 | 0.00010876  | SGCE     | 4 | MGP_VEC |
| 738 | 1.51E-08 | 0.320237546 | 0.716 | 0.609 | 0.00032981  | TUBA1B   | 4 | MGP_VEC |
| 739 | 2.07E-08 | 0.320098748 | 0.149 | 0.057 | 0.000450433 | VEGFA    | 4 | MGP_VEC |
| 740 | 1.23E-06 | 0.320036487 | 0.227 | 0.127 | 0.026786158 | FNIP2    | 4 | MGP_VEC |
| 741 | 6.88E-20 | 0.319919869 | 0.975 | 0.944 | 1.50E-15    | IFITM2   | 4 | MGP_VEC |
| 742 | 3.03E-10 | 0.319207183 | 0.255 | 0.117 | 6.61E-06    | SULF2    | 4 | MGP_VEC |
| 743 | 5.04E-12 | 0.318799371 | 0.734 | 0.576 | 1.10E-07    | EMCN     | 4 | MGP_VEC |
| 744 | 3.47E-09 | 0.318632221 | 0.989 | 0.936 | 7.56E-05    | MT-ND3   | 4 | MGP_VEC |
| 745 | 5.70E-12 | 0.317326538 | 0.894 | 0.798 | 1.24E-07    | CLEC3B   | 4 | MGP_VEC |
| 746 | 2.95E-09 | 0.316307856 | 0.688 | 0.586 | 6.44E-05    | HNRNPDL  | 4 | MGP_VEC |
| 747 | 8.26E-10 | 0.313262314 | 0.291 | 0.152 | 1.80E-05    | ANKRD37  | 4 | MGP_VEC |
| 748 | 2.01E-09 | 0.311989494 | 0.355 | 0.21  | 4.38E-05    | TMEM14A  | 4 | MGP_VEC |
| 749 | 3.01E-11 | 0.31190987  | 0.22  | 0.092 | 6.56E-07    | RNASE4   | 4 | MGP_VEC |
| 750 | 6.55E-12 | 0.310514412 | 0.312 | 0.152 | 1.43E-07    | GSTM3    | 4 | MGP_VEC |
| 751 | 2.64E-14 | 0.309206709 | 0.897 | 0.784 | 5.75E-10    | CALCRL   | 4 | MGP_VEC |
| 752 | 3.00E-35 | 0.309104858 | 0.142 | 0.007 | 6.53E-31    | GATA5    | 4 | MGP_VEC |
| 753 | 1.63E-16 | 0.308997423 | 0.188 | 0.051 | 3.55E-12    | ITGA10   | 4 | MGP_VEC |
| 754 | 6.47E-16 | 0.308757853 | 0.223 | 0.072 | 1.41E-11    | HACD1    | 4 | MGP_VEC |
| 755 | 2.67E-32 | 0.30773014  | 0.17  | 0.017 | 5.81E-28    | VIPR1    | 4 | MGP_VEC |
| 756 | 9.16E-08 | 0.307335705 | 0.723 | 0.647 | 0.001998593 | ARL6IP1  | 4 | MGP_VEC |
| 757 | 2.21E-13 | 0.306954767 | 0.95  | 0.879 | 4.83E-09    | HSPB1    | 4 | MGP_VEC |
| 758 | 2.09E-10 | 0.306136763 | 0.975 | 0.884 | 4.56E-06    | MT-ND1   | 4 | MGP_VEC |
| 759 | 2.03E-09 | 0.305703751 | 0.362 | 0.21  | 4.44E-05    | GPRC5C   | 4 | MGP_VEC |
| 760 | 1.58E-08 | 0.304881632 | 0.316 | 0.173 | 0.000344339 | THBS1    | 4 | MGP_VEC |
| 761 | 1.19E-06 | 0.303125595 | 0.472 | 0.354 | 0.026017211 | FOXP1    | 4 | MGP_VEC |
| 762 | 2.93E-07 | 0.301677162 | 0.124 | 0.046 | 0.00638967  | SELE     | 4 | MGP_VEC |
| 763 | 1.69E-06 | 0.30139701  | 0.238 | 0.136 | 0.036760901 | BRIX1    | 4 | MGP_VEC |
| 764 | 1.79E-12 | 0.300966586 | 0.904 | 0.811 | 3.91E-08    | HSPG2    | 4 | MGP_VEC |
| 765 | 3.53E-07 | 0.300919795 | 0.202 | 0.102 | 0.007698072 | INHBB    | 4 | MGP_VEC |
| 766 | 9.90E-10 | 0.300106395 | 0.993 | 0.928 | 2.16E-05    | MT-ND4L  | 4 | MGP_VEC |
| 767 | 7.93E-10 | 0.299051516 | 0.986 | 0.923 | 1.73E-05    | MT-CYB   | 4 | MGP_VEC |
| 768 | 1.59E-08 | 0.298970741 | 0.652 | 0.56  | 0.000346654 | TSPO     | 4 | MGP_VEC |

|     |          |              |       |       |             |            |   |         |
|-----|----------|--------------|-------|-------|-------------|------------|---|---------|
| 769 | 6.58E-08 | 0.296802694  | 0.309 | 0.181 | 0.001434114 | MKNK2      | 4 | MGP_VEC |
| 770 | 3.87E-12 | 0.295759521  | 0.184 | 0.063 | 8.44E-08    | SVIL       | 4 | MGP_VEC |
| 771 | 2.07E-28 | 0.29548043   | 0.149 | 0.015 | 4.52E-24    | DOK5       | 4 | MGP_VEC |
| 772 | 2.67E-13 | 0.295187683  | 0.255 | 0.103 | 5.81E-09    | TUBA4A     | 4 | MGP_VEC |
| 773 | 9.28E-08 | 0.294617231  | 0.241 | 0.127 | 0.002024856 | UGDH       | 4 | MGP_VEC |
| 774 | 4.50E-10 | 0.294406051  | 0.213 | 0.092 | 9.82E-06    | SPSB1      | 4 | MGP_VEC |
| 775 | 2.97E-07 | 0.292529251  | 0.188 | 0.092 | 0.006471425 | AH11       | 4 | MGP_VEC |
| 776 | 3.01E-07 | 0.291780349  | 0.362 | 0.224 | 0.006557785 | CD24       | 4 | MGP_VEC |
| 777 | 5.90E-08 | 0.290562674  | 0.17  | 0.072 | 0.00128759  | NNMT       | 4 | MGP_VEC |
| 778 | 2.03E-06 | 0.289331454  | 0.152 | 0.071 | 0.044170824 | WNK3       | 4 | MGP_VEC |
| 779 | 3.14E-09 | 0.286603975  | 0.507 | 0.34  | 6.85E-05    | LRRFIP1    | 4 | MGP_VEC |
| 780 | 3.99E-30 | 0.285136523  | 0.993 | 0.989 | 8.71E-26    | RPL34      | 4 | MGP_VEC |
| 781 | 3.77E-10 | 0.283115602  | 0.163 | 0.059 | 8.21E-06    | CDA        | 4 | MGP_VEC |
| 782 | 6.27E-07 | 0.282120942  | 0.709 | 0.617 | 0.013669973 | EFNA1      | 4 | MGP_VEC |
| 783 | 2.10E-16 | 0.280430513  | 0.16  | 0.037 | 4.58E-12    | TMOD1      | 4 | MGP_VEC |
| 784 | 8.87E-11 | 0.280290663  | 0.574 | 0.399 | 1.93E-06    | BCAM       | 4 | MGP_VEC |
| 785 | 2.32E-16 | 0.279949999  | 0.982 | 0.965 | 5.07E-12    | RPS6       | 4 | MGP_VEC |
| 786 | 1.12E-08 | 0.279573824  | 0.426 | 0.278 | 0.000244743 | METTTL7A   | 4 | MGP_VEC |
| 787 | 6.48E-08 | 0.277001321  | 0.691 | 0.581 | 0.001412266 | SNHG8      | 4 | MGP_VEC |
| 788 | 1.90E-11 | 0.274234455  | 0.113 | 0.028 | 4.14E-07    | BMP4       | 4 | MGP_VEC |
| 789 | 7.02E-23 | 0.27417988   | 0.11  | 0.009 | 1.53E-18    | KCNIP4     | 4 | MGP_VEC |
| 790 | 3.99E-12 | 0.273467929  | 0.252 | 0.101 | 8.70E-08    | HS3ST1     | 4 | MGP_VEC |
| 791 | 9.20E-07 | 0.273283234  | 0.699 | 0.6   | 0.020063149 | TXN        | 4 | MGP_VEC |
| 792 | 1.71E-08 | 0.272580502  | 0.943 | 0.871 | 0.000371881 | DUSP1      | 4 | MGP_VEC |
| 793 | 4.67E-10 | 0.271813953  | 0.947 | 0.843 | 1.02E-05    | HSP90AB1   | 4 | MGP_VEC |
| 794 | 1.65E-11 | 0.271005156  | 0.128 | 0.034 | 3.59E-07    | LYST       | 4 | MGP_VEC |
| 795 | 5.01E-14 | 0.270817181  | 0.996 | 0.893 | 1.09E-09    | MALAT1     | 4 | MGP_VEC |
| 796 | 2.64E-07 | 0.270691735  | 0.241 | 0.132 | 0.005759427 | RIMKLB     | 4 | MGP_VEC |
| 797 | 3.27E-19 | 0.270104766  | 0.106 | 0.012 | 7.13E-15    | MEDAG      | 4 | MGP_VEC |
| 798 | 4.12E-07 | 0.269970266  | 0.266 | 0.154 | 0.008983497 | FRY        | 4 | MGP_VEC |
| 799 | 4.93E-08 | 0.269765402  | 0.195 | 0.089 | 0.001074803 | DUSP4      | 4 | MGP_VEC |
| 800 | 1.59E-06 | 0.268884862  | 0.493 | 0.375 | 0.034772332 | CAV2       | 4 | MGP_VEC |
| 801 | 4.44E-29 | 0.267796369  | 0.131 | 0.009 | 9.68E-25    | SSTR1      | 4 | MGP_VEC |
| 802 | 9.52E-09 | 0.267080164  | 0.954 | 0.875 | 0.000207512 | MT-ND5     | 4 | MGP_VEC |
| 803 | 4.56E-09 | 0.264969378  | 0.667 | 0.524 | 9.95E-05    | ECSCR.1    | 4 | MGP_VEC |
| 804 | 1.52E-07 | 0.264952672  | 0.415 | 0.276 | 0.003325604 | COX17      | 4 | MGP_VEC |
| 805 | 1.15E-12 | 0.264062384  | 0.191 | 0.065 | 2.51E-08    | C16orf45   | 4 | MGP_VEC |
| 806 | 1.96E-07 | 0.262508096  | 0.206 | 0.102 | 0.004277504 | ARC        | 4 | MGP_VEC |
| 807 | 1.77E-17 | 0.261280744  | 0.848 | 0.689 | 3.85E-13    | CD74       | 4 | MGP_VEC |
| 808 | 1.45E-06 | 0.261070602  | 0.486 | 0.377 | 0.03159772  | CD40       | 4 | MGP_VEC |
| 809 | 2.36E-26 | 0.260829334  | 0.996 | 0.991 | 5.15E-22    | AC090498.1 | 4 | MGP_VEC |
| 810 | 8.82E-14 | 0.260544319  | 0.142 | 0.034 | 1.92E-09    | SELP       | 4 | MGP_VEC |
| 811 | 2.53E-07 | 0.258988914  | 0.39  | 0.255 | 0.005509474 | PAPSS2     | 4 | MGP_VEC |
| 812 | 1.02E-19 | 0.258337638  | 0.128 | 0.018 | 2.23E-15    | SYBU       | 4 | MGP_VEC |
| 813 | 6.28E-08 | 0.257794206  | 0.755 | 0.653 | 0.001368962 | TPM3       | 4 | MGP_VEC |
| 814 | 4.16E-07 | 0.255762168  | 0.262 | 0.152 | 0.009075047 | MIR99AHG   | 4 | MGP_VEC |
| 815 | 3.74E-07 | 0.254851701  | 0.174 | 0.082 | 0.008158692 | ENPP2      | 4 | MGP_VEC |
| 816 | 7.74E-08 | 0.253353463  | 0.131 | 0.049 | 0.001688359 | GPC1       | 4 | MGP_VEC |
| 817 | 2.01E-22 | 0.251168773  | 0.106 | 0.009 | 4.38E-18    | ANKRD29    | 4 | MGP_VEC |
| 818 | 3.81E-07 | -0.250168122 | 0.181 | 0.344 | 0.008303364 | PLOD1      | 4 | MGP_VEC |
| 819 | 1.32E-08 | -0.253010528 | 0.855 | 0.889 | 0.000287472 | IGFBP4     | 4 | MGP_VEC |
| 820 | 8.34E-07 | -0.255407363 | 0.167 | 0.319 | 0.018195176 | CNDP2      | 4 | MGP_VEC |
| 821 | 1.37E-07 | -0.256993174 | 0.103 | 0.251 | 0.002981749 | RASAL2     | 4 | MGP_VEC |
| 822 | 1.36E-06 | -0.260780168 | 0.163 | 0.311 | 0.029693818 | ZNF160     | 4 | MGP_VEC |
| 823 | 1.35E-10 | -0.263472867 | 0.947 | 0.962 | 2.94E-06    | MYL6       | 4 | MGP_VEC |
| 824 | 1.57E-07 | -0.26884374  | 0.11  | 0.259 | 0.003433486 | CD68       | 4 | MGP_VEC |
| 825 | 2.27E-06 | -0.270332    | 0.337 | 0.483 | 0.049581311 | LIMCH1     | 4 | MGP_VEC |
| 826 | 7.92E-07 | -0.270578454 | 0.23  | 0.398 | 0.017273835 | PCDH17     | 4 | MGP_VEC |
| 827 | 1.53E-08 | -0.274154957 | 0.475 | 0.656 | 0.00033447  | SERPINH1   | 4 | MGP_VEC |
| 828 | 6.11E-07 | -0.275045713 | 0.121 | 0.261 | 0.013330169 | ST3GAL4    | 4 | MGP_VEC |
| 829 | 1.54E-07 | -0.277868915 | 0.124 | 0.278 | 0.003364586 | WWP1       | 4 | MGP_VEC |
| 830 | 1.63E-07 | -0.278416084 | 0.738 | 0.784 | 0.003552446 | CCNI       | 4 | MGP_VEC |
| 831 | 2.82E-07 | -0.278563511 | 0.117 | 0.265 | 0.006155629 | TRIB2      | 4 | MGP_VEC |
| 832 | 6.75E-07 | -0.278979513 | 0.138 | 0.287 | 0.014714337 | MXD4       | 4 | MGP_VEC |
| 833 | 1.07E-06 | -0.279981308 | 0.209 | 0.369 | 0.023303689 | TMEM140    | 4 | MGP_VEC |
| 834 | 5.81E-08 | -0.280221021 | 0.181 | 0.36  | 0.0012663   | ABCG1      | 4 | MGP_VEC |
| 835 | 7.71E-07 | -0.280840893 | 0.149 | 0.299 | 0.016808217 | RCBTB2     | 4 | MGP_VEC |
| 836 | 3.93E-07 | -0.282281733 | 0.351 | 0.52  | 0.008570944 | APH1A      | 4 | MGP_VEC |
| 837 | 5.16E-07 | -0.285317081 | 0.291 | 0.458 | 0.011262831 | ICA1       | 4 | MGP_VEC |
| 838 | 5.57E-07 | -0.285488411 | 0.216 | 0.38  | 0.012149958 | TLR4       | 4 | MGP_VEC |

|     |          |              |       |       |             |                |   |         |
|-----|----------|--------------|-------|-------|-------------|----------------|---|---------|
| 839 | 4.32E-07 | -0.2870781   | 0.27  | 0.453 | 0.009417056 | CD302          | 4 | MGP_VEC |
| 840 | 1.31E-07 | -0.287695135 | 0.145 | 0.307 | 0.0028517   | CHCHD10        | 4 | MGP_VEC |
| 841 | 3.89E-07 | -0.287706992 | 0.23  | 0.393 | 0.008481245 | BLCAP          | 4 | MGP_VEC |
| 842 | 3.69E-12 | -0.287938423 | 0.989 | 0.989 | 8.04E-08    | TMSB4X         | 4 | MGP_VEC |
| 843 | 1.93E-08 | -0.288855576 | 0.621 | 0.776 | 0.000421826 | SEC14L1        | 4 | MGP_VEC |
| 844 | 4.34E-08 | -0.290944368 | 0.227 | 0.411 | 0.000946655 | DPP7           | 4 | MGP_VEC |
| 845 | 2.47E-08 | -0.291920807 | 0.103 | 0.258 | 0.000538739 | SNX18          | 4 | MGP_VEC |
| 846 | 1.03E-06 | -0.293336463 | 0.323 | 0.474 | 0.022358768 | ROBO4          | 4 | MGP_VEC |
| 847 | 1.72E-09 | -0.295825891 | 0.383 | 0.584 | 3.75E-05    | TFPI2          | 4 | MGP_VEC |
| 848 | 1.35E-09 | -0.296296031 | 0.145 | 0.329 | 2.95E-05    | HEXA           | 4 | MGP_VEC |
| 849 | 3.71E-07 | -0.297845585 | 0.167 | 0.319 | 0.008101181 | CMTM8          | 4 | MGP_VEC |
| 850 | 1.63E-06 | -0.300075518 | 0.433 | 0.563 | 0.035589803 | LAMTOR1        | 4 | MGP_VEC |
| 851 | 9.57E-07 | -0.301247472 | 0.66  | 0.725 | 0.020876476 | TMEM123        | 4 | MGP_VEC |
| 852 | 1.10E-08 | -0.302274689 | 0.234 | 0.429 | 0.000240792 | GTF2I          | 4 | MGP_VEC |
| 853 | 5.43E-07 | -0.302483426 | 0.291 | 0.451 | 0.011839483 | CSF1           | 4 | MGP_VEC |
| 854 | 1.75E-08 | -0.302761702 | 0.408 | 0.569 | 0.000381487 | TMEM50B        | 4 | MGP_VEC |
| 855 | 8.02E-07 | -0.304352138 | 0.344 | 0.497 | 0.017491819 | VAT1           | 4 | MGP_VEC |
| 856 | 2.79E-11 | -0.307804058 | 0.879 | 0.912 | 6.07E-07    | MYL12A         | 4 | MGP_VEC |
| 857 | 5.42E-07 | -0.308921151 | 0.454 | 0.597 | 0.011814257 | BSG            | 4 | MGP_VEC |
| 858 | 9.81E-08 | -0.315938024 | 0.638 | 0.727 | 0.002138746 | RAB11A         | 4 | MGP_VEC |
| 859 | 9.39E-09 | -0.316828212 | 0.202 | 0.386 | 0.000204788 | TBC1D15        | 4 | MGP_VEC |
| 860 | 9.85E-08 | -0.316982216 | 0.443 | 0.593 | 0.00214823  | CUTA           | 4 | MGP_VEC |
| 861 | 8.19E-10 | -0.318856586 | 0.106 | 0.284 | 1.79E-05    | DERA           | 4 | MGP_VEC |
| 862 | 1.60E-09 | -0.31899195  | 0.209 | 0.408 | 3.49E-05    | KIAA1033       | 4 | MGP_VEC |
| 863 | 3.08E-07 | -0.319559137 | 0.16  | 0.31  | 0.006722139 | PELO           | 4 | MGP_VEC |
| 864 | 1.86E-08 | -0.319764144 | 0.113 | 0.274 | 0.00040651  | ERRFI1         | 4 | MGP_VEC |
| 865 | 1.08E-09 | -0.320258439 | 0.411 | 0.597 | 2.35E-05    | CD164          | 4 | MGP_VEC |
| 866 | 8.49E-10 | -0.322949525 | 0.156 | 0.344 | 1.85E-05    | SCPEP1         | 4 | MGP_VEC |
| 867 | 3.64E-10 | -0.32354389  | 0.372 | 0.57  | 7.94E-06    | FKBP5          | 4 | MGP_VEC |
| 868 | 6.11E-07 | -0.324953094 | 0.199 | 0.352 | 0.013335302 | GIMAP2         | 4 | MGP_VEC |
| 869 | 6.46E-07 | -0.325050215 | 0.383 | 0.527 | 0.014094141 | NPY1R          | 4 | MGP_VEC |
| 870 | 1.13E-08 | -0.325312061 | 0.316 | 0.508 | 0.000247495 | LAMP2          | 4 | MGP_VEC |
| 871 | 4.27E-09 | -0.325712341 | 0.131 | 0.309 | 9.31E-05    | NISCH          | 4 | MGP_VEC |
| 872 | 3.60E-08 | -0.329518814 | 0.28  | 0.455 | 0.00078592  | PDIA4          | 4 | MGP_VEC |
| 873 | 9.51E-10 | -0.330771542 | 0.539 | 0.691 | 2.07E-05    | KDELR1         | 4 | MGP_VEC |
| 874 | 2.48E-09 | -0.330818855 | 0.216 | 0.407 | 5.40E-05    | ALDH6A1        | 4 | MGP_VEC |
| 875 | 1.57E-06 | -0.332002347 | 0.457 | 0.617 | 0.034143223 | ATOX1          | 4 | MGP_VEC |
| 876 | 3.15E-09 | -0.333319723 | 0.188 | 0.373 | 6.88E-05    | CNST           | 4 | MGP_VEC |
| 877 | 8.25E-08 | -0.334406122 | 0.472 | 0.619 | 0.001800173 | TCN2           | 4 | MGP_VEC |
| 878 | 2.93E-09 | -0.335961207 | 0.702 | 0.809 | 6.39E-05    | CNN3           | 4 | MGP_VEC |
| 879 | 2.75E-08 | -0.337001499 | 0.358 | 0.522 | 0.000598799 | NPR1           | 4 | MGP_VEC |
| 880 | 1.17E-07 | -0.33738137  | 0.234 | 0.405 | 0.002541527 | HECW2          | 4 | MGP_VEC |
| 881 | 1.18E-08 | -0.339318689 | 0.27  | 0.46  | 0.000257853 | C10orf11       | 4 | MGP_VEC |
| 882 | 1.10E-07 | -0.339412357 | 0.199 | 0.361 | 0.002395315 | TMEM88         | 4 | MGP_VEC |
| 883 | 6.03E-10 | -0.343358749 | 0.17  | 0.367 | 1.31E-05    | GUSB           | 4 | MGP_VEC |
| 884 | 1.67E-06 | -0.344945827 | 0.156 | 0.301 | 0.036507355 | IL32           | 4 | MGP_VEC |
| 885 | 9.93E-08 | -0.345330522 | 0.177 | 0.338 | 0.002166251 | GNG12          | 4 | MGP_VEC |
| 886 | 8.62E-10 | -0.345824269 | 0.326 | 0.537 | 1.88E-05    | FZD4           | 4 | MGP_VEC |
| 887 | 7.96E-09 | -0.346183073 | 0.404 | 0.573 | 0.000173565 | SAT2           | 4 | MGP_VEC |
| 888 | 1.91E-10 | -0.346373034 | 0.152 | 0.356 | 4.16E-06    | TMEM256-PLSCR3 | 4 | MGP_VEC |
| 889 | 4.47E-11 | -0.346765504 | 0.195 | 0.412 | 9.74E-07    | YPEL5          | 4 | MGP_VEC |
| 890 | 4.95E-10 | -0.347860238 | 0.11  | 0.286 | 1.08E-05    | CHID1          | 4 | MGP_VEC |
| 891 | 1.05E-09 | -0.34837184  | 0.443 | 0.627 | 2.29E-05    | MYDGF          | 4 | MGP_VEC |
| 892 | 1.29E-09 | -0.349404088 | 0.181 | 0.37  | 2.80E-05    | EPS15          | 4 | MGP_VEC |
| 893 | 1.09E-08 | -0.352906081 | 0.557 | 0.701 | 0.000237978 | CYBA           | 4 | MGP_VEC |
| 894 | 2.10E-09 | -0.354095672 | 0.17  | 0.356 | 4.58E-05    | SETX           | 4 | MGP_VEC |
| 895 | 1.03E-09 | -0.356747737 | 0.422 | 0.611 | 2.25E-05    | SNX6           | 4 | MGP_VEC |
| 896 | 3.68E-09 | -0.356899546 | 0.316 | 0.501 | 8.02E-05    | RRBP1          | 4 | MGP_VEC |
| 897 | 1.94E-09 | -0.359539847 | 0.301 | 0.493 | 4.23E-05    | TRAPPC5        | 4 | MGP_VEC |
| 898 | 8.43E-08 | -0.359631397 | 0.238 | 0.406 | 0.001838498 | PTPN1          | 4 | MGP_VEC |
| 899 | 1.08E-09 | -0.364216116 | 0.585 | 0.748 | 2.35E-05    | VAMP5          | 4 | MGP_VEC |
| 900 | 1.38E-06 | -0.36474402  | 0.372 | 0.509 | 0.030040808 | PDCD4          | 4 | MGP_VEC |
| 901 | 5.36E-11 | -0.365402212 | 0.287 | 0.497 | 1.17E-06    | HEXB           | 4 | MGP_VEC |
| 902 | 1.86E-09 | -0.365588719 | 0.181 | 0.362 | 4.05E-05    | GNS            | 4 | MGP_VEC |
| 903 | 3.23E-13 | -0.368107447 | 0.837 | 0.879 | 7.04E-09    | GABARAP        | 4 | MGP_VEC |
| 904 | 8.02E-10 | -0.369538252 | 0.191 | 0.376 | 1.75E-05    | ARHGEF7        | 4 | MGP_VEC |
| 905 | 1.69E-09 | -0.370504888 | 0.723 | 0.801 | 3.69E-05    | POLR2L         | 4 | MGP_VEC |
| 906 | 4.66E-12 | -0.371600963 | 0.16  | 0.382 | 1.02E-07    | CBLB           | 4 | MGP_VEC |
| 907 | 5.20E-10 | -0.371847041 | 0.277 | 0.483 | 1.13E-05    | FCHSD2         | 4 | MGP_VEC |
| 908 | 1.65E-15 | -0.374396882 | 0.83  | 0.907 | 3.60E-11    | ATP5G2         | 4 | MGP_VEC |

|     |          |              |       |       |             |          |   |         |
|-----|----------|--------------|-------|-------|-------------|----------|---|---------|
| 909 | 1.16E-08 | -0.376831482 | 0.259 | 0.43  | 0.000253057 | AKR1B1   | 4 | MGP_VEC |
| 910 | 1.85E-09 | -0.380342922 | 0.223 | 0.416 | 4.03E-05    | NUDT16   | 4 | MGP_VEC |
| 911 | 1.05E-10 | -0.380508064 | 0.603 | 0.723 | 2.29E-06    | S100A16  | 4 | MGP_VEC |
| 912 | 1.21E-12 | -0.381465742 | 0.348 | 0.582 | 2.65E-08    | HPCAL1   | 4 | MGP_VEC |
| 913 | 8.15E-12 | -0.382282274 | 0.56  | 0.738 | 1.78E-07    | ARHGDI1B | 4 | MGP_VEC |
| 914 | 1.12E-11 | -0.383254083 | 0.188 | 0.41  | 2.45E-07    | SLC35A1  | 4 | MGP_VEC |
| 915 | 1.43E-11 | -0.383607944 | 0.145 | 0.352 | 3.12E-07    | CMTM3    | 4 | MGP_VEC |
| 916 | 6.99E-09 | -0.384635367 | 0.358 | 0.539 | 0.000152389 | YES1     | 4 | MGP_VEC |
| 917 | 8.39E-09 | -0.387988052 | 0.177 | 0.35  | 0.000183014 | TMEM106C | 4 | MGP_VEC |
| 918 | 6.46E-12 | -0.388140554 | 0.177 | 0.396 | 1.41E-07    | GLMP     | 4 | MGP_VEC |
| 919 | 5.50E-13 | -0.389996823 | 0.73  | 0.79  | 1.20E-08    | SARAF    | 4 | MGP_VEC |
| 920 | 1.08E-12 | -0.393676974 | 0.117 | 0.331 | 2.35E-08    | SORBS1   | 4 | MGP_VEC |
| 921 | 6.60E-12 | -0.394397795 | 0.266 | 0.501 | 1.44E-07    | PHACTR2  | 4 | MGP_VEC |
| 922 | 4.25E-13 | -0.394988708 | 0.681 | 0.772 | 9.26E-09    | PDIA3    | 4 | MGP_VEC |
| 923 | 4.02E-15 | -0.394991792 | 0.872 | 0.889 | 8.76E-11    | HSP90B1  | 4 | MGP_VEC |
| 924 | 1.31E-13 | -0.397718805 | 0.745 | 0.829 | 2.85E-09    | SDPR     | 4 | MGP_VEC |
| 925 | 9.30E-12 | -0.401160808 | 0.195 | 0.41  | 2.03E-07    | WASL     | 4 | MGP_VEC |
| 926 | 3.33E-10 | -0.401416971 | 0.355 | 0.562 | 7.26E-06    | UGCG     | 4 | MGP_VEC |
| 927 | 8.35E-10 | -0.402018179 | 0.277 | 0.46  | 1.82E-05    | CARHSP1  | 4 | MGP_VEC |
| 928 | 6.71E-08 | -0.402292223 | 0.681 | 0.775 | 0.001463836 | CLDN5    | 4 | MGP_VEC |
| 929 | 3.36E-11 | -0.406873551 | 0.369 | 0.565 | 7.32E-07    | LRRFIP2  | 4 | MGP_VEC |
| 930 | 1.28E-10 | -0.408119319 | 0.567 | 0.713 | 2.80E-06    | RDX      | 4 | MGP_VEC |
| 931 | 3.58E-09 | -0.410211774 | 0.493 | 0.629 | 7.81E-05    | SLC40A1  | 4 | MGP_VEC |
| 932 | 1.37E-10 | -0.413455732 | 0.394 | 0.564 | 2.99E-06    | GRINA    | 4 | MGP_VEC |
| 933 | 6.10E-14 | -0.414796247 | 0.606 | 0.761 | 1.33E-09    | GSTO1    | 4 | MGP_VEC |
| 934 | 1.19E-10 | -0.415220341 | 0.241 | 0.438 | 2.59E-06    | FHL1     | 4 | MGP_VEC |
| 935 | 7.78E-10 | -0.41657058  | 0.362 | 0.551 | 1.70E-05    | LEPROTL1 | 4 | MGP_VEC |
| 936 | 1.14E-11 | -0.4169614   | 0.206 | 0.421 | 2.48E-07    | TSPAN4   | 4 | MGP_VEC |
| 937 | 1.31E-10 | -0.41789429  | 0.287 | 0.487 | 2.86E-06    | OSTF1    | 4 | MGP_VEC |
| 938 | 6.13E-12 | -0.417895049 | 0.128 | 0.336 | 1.34E-07    | SLC27A3  | 4 | MGP_VEC |
| 939 | 1.10E-13 | -0.419649804 | 0.22  | 0.458 | 2.40E-09    | TNFRSF14 | 4 | MGP_VEC |
| 940 | 1.68E-12 | -0.419799143 | 0.11  | 0.317 | 3.66E-08    | SH3TC1   | 4 | MGP_VEC |
| 941 | 4.22E-13 | -0.421449138 | 0.188 | 0.42  | 9.20E-09    | CLTC     | 4 | MGP_VEC |
| 942 | 5.00E-13 | -0.423005588 | 0.305 | 0.547 | 1.09E-08    | DENND4C  | 4 | MGP_VEC |
| 943 | 9.81E-13 | -0.429651869 | 0.326 | 0.555 | 2.14E-08    | ADD3     | 4 | MGP_VEC |
| 944 | 4.39E-11 | -0.435103881 | 0.316 | 0.535 | 9.57E-07    | SC5D     | 4 | MGP_VEC |
| 945 | 2.71E-12 | -0.437954995 | 0.17  | 0.384 | 5.91E-08    | CRYL1    | 4 | MGP_VEC |
| 946 | 2.22E-06 | -0.441737413 | 0.309 | 0.447 | 0.048364985 | OLFM1    | 4 | MGP_VEC |
| 947 | 3.48E-12 | -0.443283008 | 0.17  | 0.385 | 7.60E-08    | TSN      | 4 | MGP_VEC |
| 948 | 3.61E-08 | -0.449131421 | 0.191 | 0.358 | 0.000787214 | PHLDA1   | 4 | MGP_VEC |
| 949 | 2.35E-21 | -0.452169456 | 0.826 | 0.869 | 5.12E-17    | FCGRT    | 4 | MGP_VEC |
| 950 | 4.65E-10 | -0.456021616 | 0.684 | 0.782 | 1.02E-05    | LIFR     | 4 | MGP_VEC |
| 951 | 1.83E-17 | -0.45617669  | 0.752 | 0.82  | 3.98E-13    | PSAP     | 4 | MGP_VEC |
| 952 | 3.23E-13 | -0.458493656 | 0.376 | 0.573 | 7.05E-09    | CALU     | 4 | MGP_VEC |
| 953 | 3.39E-13 | -0.459374077 | 0.124 | 0.341 | 7.38E-09    | EIF4EBP1 | 4 | MGP_VEC |
| 954 | 2.13E-12 | -0.461586317 | 0.28  | 0.507 | 4.64E-08    | TMEM2    | 4 | MGP_VEC |
| 955 | 4.47E-15 | -0.465800211 | 0.397 | 0.626 | 9.74E-11    | PDE2A    | 4 | MGP_VEC |
| 956 | 1.09E-15 | -0.466634104 | 0.199 | 0.462 | 2.38E-11    | NECAP2   | 4 | MGP_VEC |
| 957 | 2.91E-13 | -0.46805739  | 0.103 | 0.324 | 6.34E-09    | RENBP    | 4 | MGP_VEC |
| 958 | 1.56E-25 | -0.473228476 | 0.879 | 0.912 | 3.41E-21    | PPIB     | 4 | MGP_VEC |
| 959 | 3.08E-12 | -0.477613899 | 0.277 | 0.489 | 6.71E-08    | TSPAN6   | 4 | MGP_VEC |
| 960 | 2.51E-29 | -0.480619221 | 0.865 | 0.912 | 5.48E-25    | APP      | 4 | MGP_VEC |
| 961 | 1.37E-14 | -0.482888837 | 0.209 | 0.452 | 2.98E-10    | EPOR     | 4 | MGP_VEC |
| 962 | 2.48E-17 | -0.484210436 | 0.5   | 0.685 | 5.42E-13    | LAMP1    | 4 | MGP_VEC |
| 963 | 3.97E-15 | -0.492098229 | 0.486 | 0.669 | 8.65E-11    | AP2M1    | 4 | MGP_VEC |
| 964 | 2.85E-12 | -0.500379269 | 0.28  | 0.518 | 6.21E-08    | MEG3     | 4 | MGP_VEC |
| 965 | 1.73E-12 | -0.501773658 | 0.394 | 0.611 | 3.77E-08    | NUPR1    | 4 | MGP_VEC |
| 966 | 4.75E-16 | -0.50178421  | 0.152 | 0.404 | 1.04E-11    | RAB20    | 4 | MGP_VEC |
| 967 | 8.27E-18 | -0.502204826 | 0.156 | 0.423 | 1.80E-13    | DRAM2    | 4 | MGP_VEC |
| 968 | 1.68E-20 | -0.503200186 | 0.738 | 0.843 | 3.66E-16    | NDUFA4   | 4 | MGP_VEC |
| 969 | 4.71E-26 | -0.50362508  | 0.805 | 0.862 | 1.03E-21    | NPC2     | 4 | MGP_VEC |
| 970 | 1.13E-13 | -0.509816518 | 0.163 | 0.402 | 2.46E-09    | LRG1     | 4 | MGP_VEC |
| 971 | 1.49E-15 | -0.510181114 | 0.443 | 0.666 | 3.26E-11    | NTN4     | 4 | MGP_VEC |
| 972 | 1.14E-17 | -0.510265297 | 0.379 | 0.635 | 2.50E-13    | ARHGAP29 | 4 | MGP_VEC |
| 973 | 2.45E-15 | -0.512894059 | 0.195 | 0.454 | 5.34E-11    | HIPK2    | 4 | MGP_VEC |
| 974 | 1.88E-15 | -0.513929788 | 0.213 | 0.479 | 4.10E-11    | COL4A1   | 4 | MGP_VEC |
| 975 | 4.56E-18 | -0.514809392 | 0.149 | 0.428 | 9.95E-14    | MYO10    | 4 | MGP_VEC |
| 976 | 6.06E-14 | -0.517028197 | 0.124 | 0.349 | 1.32E-09    | FAM84A   | 4 | MGP_VEC |
| 977 | 7.21E-16 | -0.535914186 | 0.319 | 0.555 | 1.57E-11    | CCNG1    | 4 | MGP_VEC |
| 978 | 3.12E-19 | -0.539609778 | 0.546 | 0.741 | 6.80E-15    | TGFBR2   | 4 | MGP_VEC |

|      |          |              |       |       |          |          |   |         |
|------|----------|--------------|-------|-------|----------|----------|---|---------|
| 979  | 1.14E-15 | -0.539930502 | 0.206 | 0.463 | 2.48E-11 | MZT2A    | 4 | MGP_VEC |
| 980  | 2.96E-19 | -0.550820413 | 0.613 | 0.756 | 6.45E-15 | PDIA6    | 4 | MGP_VEC |
| 981  | 3.97E-20 | -0.555353147 | 0.209 | 0.507 | 8.66E-16 | COL4A2   | 4 | MGP_VEC |
| 982  | 1.88E-21 | -0.556167044 | 0.582 | 0.753 | 4.10E-17 | CTSB     | 4 | MGP_VEC |
| 983  | 2.38E-22 | -0.559458302 | 0.613 | 0.795 | 5.19E-18 | CLTA     | 4 | MGP_VEC |
| 984  | 4.91E-23 | -0.575251164 | 0.631 | 0.827 | 1.07E-18 | GPX4     | 4 | MGP_VEC |
| 985  | 2.90E-20 | -0.580354863 | 0.358 | 0.638 | 6.31E-16 | GPX1     | 4 | MGP_VEC |
| 986  | 1.32E-20 | -0.585719576 | 0.45  | 0.673 | 2.87E-16 | JAK1     | 4 | MGP_VEC |
| 987  | 6.13E-19 | -0.588548056 | 0.191 | 0.492 | 1.34E-14 | NR2F1    | 4 | MGP_VEC |
| 988  | 3.69E-19 | -0.58855762  | 0.404 | 0.664 | 8.06E-15 | ICAM2    | 4 | MGP_VEC |
| 989  | 6.05E-22 | -0.589006186 | 0.557 | 0.748 | 1.32E-17 | PPFIBP1  | 4 | MGP_VEC |
| 990  | 9.85E-20 | -0.592221995 | 0.514 | 0.716 | 2.15E-15 | LPAR6    | 4 | MGP_VEC |
| 991  | 2.83E-27 | -0.592570456 | 0.84  | 0.904 | 6.16E-23 | IL6ST    | 4 | MGP_VEC |
| 992  | 9.69E-18 | -0.592761466 | 0.28  | 0.54  | 2.11E-13 | NRP1     | 4 | MGP_VEC |
| 993  | 6.76E-21 | -0.593361569 | 0.429 | 0.693 | 1.47E-16 | GMFG     | 4 | MGP_VEC |
| 994  | 2.93E-19 | -0.613578334 | 0.103 | 0.375 | 6.38E-15 | CPM      | 4 | MGP_VEC |
| 995  | 1.84E-21 | -0.625923726 | 0.241 | 0.526 | 4.00E-17 | TPP1     | 4 | MGP_VEC |
| 996  | 2.89E-24 | -0.63182597  | 0.465 | 0.73  | 6.29E-20 | ADGRF5   | 4 | MGP_VEC |
| 997  | 4.59E-29 | -0.6330423   | 0.582 | 0.796 | 1.00E-24 | AP2S1    | 4 | MGP_VEC |
| 998  | 9.02E-26 | -0.63411672  | 0.638 | 0.784 | 1.97E-21 | PRCP     | 4 | MGP_VEC |
| 999  | 4.36E-27 | -0.642945949 | 0.582 | 0.776 | 9.50E-23 | GRN      | 4 | MGP_VEC |
| 1000 | 6.96E-21 | -0.652149657 | 0.525 | 0.722 | 1.52E-16 | ADGRL4   | 4 | MGP_VEC |
| 1001 | 4.27E-22 | -0.655450833 | 0.234 | 0.535 | 9.32E-18 | NRP2     | 4 | MGP_VEC |
| 1002 | 1.07E-51 | -0.656290781 | 0.975 | 0.993 | 2.34E-47 | FTL      | 4 | MGP_VEC |
| 1003 | 2.03E-20 | -0.657679761 | 0.468 | 0.713 | 4.42E-16 | PDK4     | 4 | MGP_VEC |
| 1004 | 1.07E-29 | -0.667989399 | 0.745 | 0.854 | 2.34E-25 | CALR     | 4 | MGP_VEC |
| 1005 | 8.41E-25 | -0.668554519 | 0.422 | 0.693 | 1.83E-20 | GLO1     | 4 | MGP_VEC |
| 1006 | 5.78E-25 | -0.683796846 | 0.248 | 0.55  | 1.26E-20 | SNX2     | 4 | MGP_VEC |
| 1007 | 3.18E-24 | -0.685600427 | 0.535 | 0.726 | 6.93E-20 | P4HB     | 4 | MGP_VEC |
| 1008 | 1.75E-23 | -0.685923641 | 0.227 | 0.538 | 3.81E-19 | DAB2     | 4 | MGP_VEC |
| 1009 | 1.36E-18 | -0.686621637 | 0.355 | 0.629 | 2.96E-14 | C8orf4   | 4 | MGP_VEC |
| 1010 | 4.87E-26 | -0.687156655 | 0.113 | 0.453 | 1.06E-21 | PXDN     | 4 | MGP_VEC |
| 1011 | 7.18E-27 | -0.687904075 | 0.121 | 0.472 | 1.56E-22 | GIMAP5   | 4 | MGP_VEC |
| 1012 | 1.49E-43 | -0.690303666 | 0.929 | 0.933 | 3.24E-39 | CCL14    | 4 | MGP_VEC |
| 1013 | 1.32E-26 | -0.690674596 | 0.457 | 0.731 | 2.88E-22 | CLEC2B   | 4 | MGP_VEC |
| 1014 | 3.00E-28 | -0.704476998 | 0.848 | 0.904 | 6.53E-24 | TIMP3    | 4 | MGP_VEC |
| 1015 | 1.03E-27 | -0.70650084  | 0.613 | 0.797 | 2.26E-23 | MARCKSL1 | 4 | MGP_VEC |
| 1016 | 4.14E-18 | -0.710754576 | 0.358 | 0.6   | 9.02E-14 | PLIN2    | 4 | MGP_VEC |
| 1017 | 4.90E-31 | -0.717132295 | 0.557 | 0.799 | 1.07E-26 | CSTB     | 4 | MGP_VEC |
| 1018 | 1.54E-22 | -0.718137737 | 0.33  | 0.62  | 3.35E-18 | CD36     | 4 | MGP_VEC |
| 1019 | 1.24E-26 | -0.730676332 | 0.422 | 0.695 | 2.71E-22 | LY96     | 4 | MGP_VEC |
| 1020 | 7.10E-28 | -0.747108468 | 0.227 | 0.571 | 1.55E-23 | SEMA6A   | 4 | MGP_VEC |
| 1021 | 5.28E-27 | -0.782559495 | 0.348 | 0.636 | 1.15E-22 | SNX5     | 4 | MGP_VEC |
| 1022 | 1.07E-32 | -0.81350133  | 0.355 | 0.677 | 2.33E-28 | CTSA     | 4 | MGP_VEC |
| 1023 | 1.92E-30 | -0.817540001 | 0.216 | 0.577 | 4.19E-26 | SMTN     | 4 | MGP_VEC |
| 1024 | 5.66E-32 | -0.828231644 | 0.195 | 0.571 | 1.24E-27 | TM4SF18  | 4 | MGP_VEC |
| 1025 | 5.23E-25 | -0.856993745 | 0.436 | 0.692 | 1.14E-20 | ADM      | 4 | MGP_VEC |
| 1026 | 1.02E-37 | -0.866400112 | 0.323 | 0.677 | 2.23E-33 | AP1S2    | 4 | MGP_VEC |
| 1027 | 7.72E-43 | -0.88236029  | 0.72  | 0.879 | 1.68E-38 | RAMP3    | 4 | MGP_VEC |
| 1028 | 4.68E-51 | -0.884036168 | 0.752 | 0.913 | 1.02E-46 | ENG      | 4 | MGP_VEC |
| 1029 | 1.21E-31 | -0.887220525 | 0.472 | 0.72  | 2.65E-27 | ASAH1    | 4 | MGP_VEC |
| 1030 | 9.99E-32 | -0.900764546 | 0.223 | 0.575 | 2.18E-27 | NID1     | 4 | MGP_VEC |
| 1031 | 3.00E-46 | -0.922217711 | 0.642 | 0.852 | 6.53E-42 | SPARC    | 4 | MGP_VEC |
| 1032 | 3.25E-40 | -0.922220686 | 0.216 | 0.638 | 7.09E-36 | KDR      | 4 | MGP_VEC |
| 1033 | 8.99E-49 | -0.933154386 | 0.504 | 0.823 | 1.96E-44 | GYPC     | 4 | MGP_VEC |
| 1034 | 1.11E-40 | -0.99592244  | 0.557 | 0.822 | 2.42E-36 | SGK1     | 4 | MGP_VEC |
| 1035 | 8.31E-46 | -1.138605331 | 0.465 | 0.749 | 1.81E-41 | MRC1     | 4 | MGP_VEC |
| 1036 | 1.74E-49 | -1.186425795 | 0.255 | 0.673 | 3.79E-45 | CXCL16   | 4 | MGP_VEC |
| 1037 | 6.88E-57 | -1.257811219 | 0.191 | 0.681 | 1.50E-52 | COTL1    | 4 | MGP_VEC |
| 1038 | 3.65E-60 | -1.30577286  | 0.223 | 0.726 | 7.95E-56 | MAF      | 4 | MGP_VEC |
| 1039 | 7.61E-41 | -1.31125175  | 0.387 | 0.72  | 1.66E-36 | STAB1    | 4 | MGP_VEC |
| 1040 | 7.25E-58 | -1.348055099 | 0.528 | 0.84  | 1.58E-53 | CRHBP    | 4 | MGP_VEC |
| 1041 | 4.40E-68 | -1.494776411 | 0.574 | 0.869 | 9.59E-64 | CTSD     | 4 | MGP_VEC |
| 1042 | 7.15E-41 | -1.517084454 | 0.138 | 0.572 | 1.56E-36 | CCL23    | 4 | MGP_VEC |
| 1043 | 1.04E-61 | -1.571959123 | 0.227 | 0.711 | 2.26E-57 | CD4      | 4 | MGP_VEC |
| 1044 | 3.20E-74 | -1.626123109 | 0.723 | 0.912 | 6.99E-70 | SEPP1    | 4 | MGP_VEC |
| 1045 | 2.43E-71 | -1.74550079  | 0.45  | 0.822 | 5.31E-67 | LGMN     | 4 | MGP_VEC |
| 1046 | 4.36E-69 | -1.854348305 | 0.365 | 0.786 | 9.50E-65 | ACP5     | 4 | MGP_VEC |
| 1047 | 1.99E-80 | -2.188607076 | 0.113 | 0.736 | 4.34E-76 | MS4A6A   | 4 | MGP_VEC |
| 1048 | 6.90E-85 | -2.227164586 | 0.113 | 0.752 | 1.50E-80 | OIT3     | 4 | MGP_VEC |

|      |           |              |       |       |             |          |   |            |
|------|-----------|--------------|-------|-------|-------------|----------|---|------------|
| 1049 | 8.21E-109 | -2.481374546 | 0.309 | 0.913 | 1.79E-104   | FCN3     | 4 | MGP_VEC    |
| 1050 | 1.07E-113 | -2.498267849 | 0.351 | 0.916 | 2.34E-109   | DNASE1L3 | 4 | MGP_VEC    |
| 1051 | 2.61E-100 | -2.651590026 | 0.422 | 0.894 | 5.68E-96    | CTSL     | 4 | MGP_VEC    |
| 1052 | 3.06E-15  | 0.899295166  | 0.59  | 0.574 | 6.67E-11    | NUPR1    | 5 | NUPR1_LSEC |
| 1053 | 5.01E-26  | 0.789573309  | 0.791 | 0.796 | 1.09E-21    | GPX4     | 5 | NUPR1_LSEC |
| 1054 | 5.42E-22  | 0.763515934  | 0.736 | 0.764 | 1.18E-17    | CSTB     | 5 | NUPR1_LSEC |
| 1055 | 9.31E-07  | 0.762795768  | 0.272 | 0.18  | 0.020312316 | PVALB    | 5 | NUPR1_LSEC |
| 1056 | 4.46E-20  | 0.758885066  | 0.728 | 0.798 | 9.72E-16    | POLR2L   | 5 | NUPR1_LSEC |
| 1057 | 2.37E-31  | 0.757900993  | 0.828 | 0.763 | 5.16E-27    | GYPC     | 5 | NUPR1_LSEC |
| 1058 | 8.88E-23  | 0.734910128  | 0.778 | 0.766 | 1.94E-18    | MARCKSL1 | 5 | NUPR1_LSEC |
| 1059 | 6.62E-77  | 0.72594599   | 1     | 0.989 | 1.44E-72    | FTL      | 5 | NUPR1_LSEC |
| 1060 | 7.28E-10  | 0.725882563  | 0.556 | 0.599 | 1.59E-05    | GPX1     | 5 | NUPR1_LSEC |
| 1061 | 1.34E-41  | 0.721088246  | 0.983 | 0.866 | 2.92E-37    | SEPP1    | 5 | NUPR1_LSEC |
| 1062 | 2.65E-30  | 0.684145336  | 0.828 | 0.88  | 5.79E-26    | GABARAP  | 5 | NUPR1_LSEC |
| 1063 | 7.53E-10  | 0.683621189  | 0.586 | 0.661 | 1.64E-05    | GMFG     | 5 | NUPR1_LSEC |
| 1064 | 1.35E-10  | 0.681548478  | 0.628 | 0.649 | 2.95E-06    | MAF      | 5 | NUPR1_LSEC |
| 1065 | 3.52E-19  | 0.674315834  | 0.724 | 0.768 | 7.69E-15    | AP2S1    | 5 | NUPR1_LSEC |
| 1066 | 1.40E-15  | 0.669351966  | 0.674 | 0.73  | 3.06E-11    | VAMP5    | 5 | NUPR1_LSEC |
| 1067 | 2.01E-30  | 0.658333639  | 0.946 | 0.606 | 4.39E-26    | CLEC4G   | 5 | NUPR1_LSEC |
| 1068 | 1.66E-70  | 0.636068924  | 1     | 0.992 | 3.62E-66    | RPL39    | 5 | NUPR1_LSEC |
| 1069 | 2.85E-13  | 0.629836188  | 0.632 | 0.598 | 6.22E-09    | COTL1    | 5 | NUPR1_LSEC |
| 1070 | 2.71E-15  | 0.627636265  | 0.699 | 0.777 | 5.91E-11    | CLTA     | 5 | NUPR1_LSEC |
| 1071 | 3.35E-28  | 0.610461398  | 0.874 | 0.898 | 7.31E-24    | ATP5G2   | 5 | NUPR1_LSEC |
| 1072 | 2.88E-10  | 0.600272518  | 0.628 | 0.716 | 6.28E-06    | S100A16  | 5 | NUPR1_LSEC |
| 1073 | 1.38E-38  | 0.600249408  | 0.983 | 0.976 | 3.01E-34    | SERF2    | 5 | NUPR1_LSEC |
| 1074 | 8.42E-10  | 0.585615456  | 0.611 | 0.656 | 1.84E-05    | GLO1     | 5 | NUPR1_LSEC |
| 1075 | 4.47E-09  | 0.579624408  | 0.628 | 0.756 | 9.75E-05    | UQCR11   | 5 | NUPR1_LSEC |
| 1076 | 8.74E-17  | 0.574188925  | 0.854 | 0.697 | 1.91E-12    | ACP5     | 5 | NUPR1_LSEC |
| 1077 | 9.55E-08  | 0.573139569  | 0.502 | 0.458 | 0.002082389 | EHD3     | 5 | NUPR1_LSEC |
| 1078 | 4.54E-19  | 0.566138804  | 0.757 | 0.522 | 9.89E-15    | CD14     | 5 | NUPR1_LSEC |
| 1079 | 4.54E-08  | 0.554889223  | 0.636 | 0.687 | 0.000989506 | ASAH1    | 5 | NUPR1_LSEC |
| 1080 | 2.18E-12  | 0.554230696  | 0.757 | 0.851 | 4.75E-08    | ALDOA    | 5 | NUPR1_LSEC |
| 1081 | 8.16E-11  | 0.540144527  | 0.711 | 0.838 | 1.78E-06    | COX5B    | 5 | NUPR1_LSEC |
| 1082 | 4.30E-23  | 0.532623721  | 0.983 | 0.79  | 9.38E-19    | FCN3     | 5 | NUPR1_LSEC |
| 1083 | 2.34E-15  | 0.52618022   | 0.791 | 0.585 | 5.10E-11    | CLEC1B   | 5 | NUPR1_LSEC |
| 1084 | 2.11E-30  | 0.524614718  | 0.975 | 0.953 | 4.60E-26    | UBA52    | 5 | NUPR1_LSEC |
| 1085 | 5.57E-07  | 0.506103987  | 0.686 | 0.809 | 0.012149463 | CNN3     | 5 | NUPR1_LSEC |
| 1086 | 1.67E-06  | 0.505031569  | 0.586 | 0.61  | 0.036452441 | CXCL16   | 5 | NUPR1_LSEC |
| 1087 | 3.27E-19  | 0.504397565  | 0.854 | 0.931 | 7.13E-15    | ATP5E    | 5 | NUPR1_LSEC |
| 1088 | 2.08E-13  | 0.500721847  | 0.841 | 0.75  | 4.53E-09    | LGMN     | 5 | NUPR1_LSEC |
| 1089 | 2.54E-09  | 0.49301316   | 0.711 | 0.844 | 5.54E-05    | NDUFA4   | 5 | NUPR1_LSEC |
| 1090 | 3.24E-07  | 0.490713123  | 0.628 | 0.789 | 0.00707219  | CHCHD2   | 5 | NUPR1_LSEC |
| 1091 | 6.51E-17  | 0.487945194  | 0.833 | 0.918 | 1.42E-12    | MYL12A   | 5 | NUPR1_LSEC |
| 1092 | 3.91E-07  | 0.482357847  | 0.657 | 0.63  | 0.008522935 | CD4      | 5 | NUPR1_LSEC |
| 1093 | 5.61E-07  | 0.475172271  | 0.623 | 0.754 | 0.012244272 | GSTO1    | 5 | NUPR1_LSEC |
| 1094 | 1.07E-31  | 0.463519181  | 1     | 0.922 | 2.34E-27    | CCL14    | 5 | NUPR1_LSEC |
| 1095 | 1.01E-10  | 0.460684532  | 0.72  | 0.843 | 2.19E-06    | PRDX1    | 5 | NUPR1_LSEC |
| 1096 | 7.87E-13  | 0.452125863  | 0.82  | 0.911 | 1.72E-08    | PFN1     | 5 | NUPR1_LSEC |
| 1097 | 8.35E-23  | 0.440732229  | 0.967 | 0.795 | 1.82E-18    | CTSL     | 5 | NUPR1_LSEC |
| 1098 | 1.78E-11  | 0.433842687  | 0.883 | 0.813 | 3.88E-07    | CTSD     | 5 | NUPR1_LSEC |
| 1099 | 9.08E-39  | 0.432500767  | 1     | 0.988 | 1.98E-34    | RPS27    | 5 | NUPR1_LSEC |
| 1100 | 5.84E-14  | 0.431250967  | 0.816 | 0.608 | 1.27E-09    | MS4A6A   | 5 | NUPR1_LSEC |
| 1101 | 7.05E-44  | 0.428880082  | 1     | 0.993 | 1.54E-39    | RPL28    | 5 | NUPR1_LSEC |
| 1102 | 5.89E-54  | 0.428602637  | 1     | 0.993 | 1.29E-49    | RPS28    | 5 | NUPR1_LSEC |
| 1103 | 5.90E-07  | 0.423388644  | 0.682 | 0.823 | 0.01285596  | PPDPF    | 5 | NUPR1_LSEC |
| 1104 | 1.20E-11  | 0.415026023  | 0.753 | 0.859 | 2.61E-07    | SDCBP    | 5 | NUPR1_LSEC |
| 1105 | 3.84E-11  | 0.413860365  | 0.866 | 0.915 | 8.38E-07    | RPS29    | 5 | NUPR1_LSEC |
| 1106 | 1.23E-08  | 0.413743527  | 0.799 | 0.862 | 0.000268246 | RAMP3    | 5 | NUPR1_LSEC |
| 1107 | 2.01E-32  | 0.412555089  | 1     | 0.984 | 4.38E-28    | RPS13    | 5 | NUPR1_LSEC |
| 1108 | 1.63E-12  | 0.408753583  | 0.937 | 0.954 | 3.57E-08    | ACTB     | 5 | NUPR1_LSEC |
| 1109 | 6.94E-07  | 0.408748336  | 0.707 | 0.852 | 0.015132827 | OST4     | 5 | NUPR1_LSEC |
| 1110 | 7.01E-16  | 0.404144861  | 0.912 | 0.952 | 1.53E-11    | RPL35    | 5 | NUPR1_LSEC |
| 1111 | 5.67E-37  | 0.396610704  | 0.996 | 0.991 | 1.24E-32    | RPS12    | 5 | NUPR1_LSEC |
| 1112 | 1.73E-18  | 0.38910829   | 0.929 | 0.964 | 3.77E-14    | MYL6     | 5 | NUPR1_LSEC |
| 1113 | 1.55E-06  | 0.388624883  | 0.686 | 0.846 | 0.033833127 | MIF      | 5 | NUPR1_LSEC |
| 1114 | 6.01E-21  | 0.387260439  | 0.996 | 0.982 | 1.31E-16    | RPL12    | 5 | NUPR1_LSEC |
| 1115 | 4.61E-25  | 0.384141928  | 0.992 | 0.988 | 1.00E-20    | RPLP2    | 5 | NUPR1_LSEC |
| 1116 | 6.70E-09  | 0.383247784  | 0.774 | 0.889 | 0.000146066 | MYL12B   | 5 | NUPR1_LSEC |
| 1117 | 7.44E-38  | 0.382767069  | 1     | 0.997 | 1.62E-33    | RPLP1    | 5 | NUPR1_LSEC |
| 1118 | 3.64E-13  | 0.381971522  | 0.908 | 0.919 | 7.94E-09    | RPS5     | 5 | NUPR1_LSEC |

|      |          |              |       |       |             |            |   |            |
|------|----------|--------------|-------|-------|-------------|------------|---|------------|
| 1119 | 3.32E-21 | 0.378250502  | 0.983 | 0.974 | 7.24E-17    | RPL18A     | 5 | NUPRI_LSEC |
| 1120 | 2.04E-12 | 0.373514723  | 0.9   | 0.944 | 4.45E-08    | RPL9       | 5 | NUPRI_LSEC |
| 1121 | 4.90E-37 | 0.372923001  | 1     | 0.995 | 1.07E-32    | EEF1A1     | 5 | NUPRI_LSEC |
| 1122 | 6.40E-11 | 0.369904987  | 0.808 | 0.909 | 1.40E-06    | RPL7       | 5 | NUPRI_LSEC |
| 1123 | 1.89E-09 | 0.36710417   | 0.82  | 0.891 | 4.11E-05    | RPS4Y1     | 5 | NUPRI_LSEC |
| 1124 | 3.09E-24 | 0.360303257  | 1     | 0.987 | 6.74E-20    | RPL36      | 5 | NUPRI_LSEC |
| 1125 | 3.70E-15 | 0.358585895  | 0.933 | 0.963 | 8.08E-11    | PPIA       | 5 | NUPRI_LSEC |
| 1126 | 6.84E-09 | 0.352367331  | 0.812 | 0.61  | 0.000149142 | FCGR2B     | 5 | NUPRI_LSEC |
| 1127 | 1.03E-28 | 0.341774293  | 0.992 | 0.99  | 2.25E-24    | RPL19      | 5 | NUPRI_LSEC |
| 1128 | 3.47E-12 | 0.341239955  | 0.958 | 0.649 | 7.57E-08    | FCN2       | 5 | NUPRI_LSEC |
| 1129 | 4.05E-11 | 0.339180317  | 0.971 | 0.803 | 8.83E-07    | DNASE1L3   | 5 | NUPRI_LSEC |
| 1130 | 5.07E-28 | 0.338913429  | 0.996 | 0.989 | 1.11E-23    | RPL32      | 5 | NUPRI_LSEC |
| 1131 | 1.05E-10 | 0.335112453  | 0.904 | 0.937 | 2.29E-06    | RPL21      | 5 | NUPRI_LSEC |
| 1132 | 3.36E-30 | 0.334384137  | 1     | 0.991 | 7.33E-26    | RPL11      | 5 | NUPRI_LSEC |
| 1133 | 1.30E-23 | 0.333604531  | 0.996 | 0.986 | 2.83E-19    | RPS15      | 5 | NUPRI_LSEC |
| 1134 | 2.05E-20 | 0.321719216  | 0.987 | 0.984 | 4.46E-16    | RPL29      | 5 | NUPRI_LSEC |
| 1135 | 8.83E-14 | 0.321423705  | 0.937 | 0.963 | 1.93E-09    | RPL24      | 5 | NUPRI_LSEC |
| 1136 | 3.70E-23 | 0.320763125  | 0.979 | 0.98  | 8.08E-19    | RPL18      | 5 | NUPRI_LSEC |
| 1137 | 5.01E-09 | 0.320390957  | 0.891 | 0.942 | 0.00010922  | S100A10    | 5 | NUPRI_LSEC |
| 1138 | 1.11E-21 | 0.319551027  | 0.992 | 0.988 | 2.42E-17    | TMSB4X     | 5 | NUPRI_LSEC |
| 1139 | 3.09E-19 | 0.316906091  | 0.987 | 0.973 | 6.74E-15    | RPS3A      | 5 | NUPRI_LSEC |
| 1140 | 4.25E-15 | 0.316039869  | 0.975 | 0.983 | 9.28E-11    | RPS7       | 5 | NUPRI_LSEC |
| 1141 | 3.31E-23 | 0.311987993  | 1     | 0.991 | 7.23E-19    | RPL13      | 5 | NUPRI_LSEC |
| 1142 | 3.71E-26 | 0.310377603  | 1     | 0.995 | 8.08E-22    | RPL10      | 5 | NUPRI_LSEC |
| 1143 | 1.50E-18 | 0.308127838  | 0.996 | 0.983 | 3.27E-14    | RPL35A     | 5 | NUPRI_LSEC |
| 1144 | 1.03E-22 | 0.306226912  | 0.996 | 0.989 | 2.25E-18    | RPL37      | 5 | NUPRI_LSEC |
| 1145 | 1.17E-11 | 0.305507208  | 0.967 | 0.971 | 2.56E-07    | RPL7A      | 5 | NUPRI_LSEC |
| 1146 | 5.79E-14 | 0.304387136  | 0.967 | 0.971 | 1.26E-09    | RPL8       | 5 | NUPRI_LSEC |
| 1147 | 9.29E-15 | 0.304008267  | 0.979 | 0.982 | 2.03E-10    | FAU        | 5 | NUPRI_LSEC |
| 1148 | 4.35E-13 | 0.302560236  | 0.937 | 0.976 | 9.49E-09    | RPL22      | 5 | NUPRI_LSEC |
| 1149 | 6.46E-08 | 0.30045197   | 0.757 | 0.558 | 0.00140845  | CLEC4M     | 5 | NUPRI_LSEC |
| 1150 | 1.28E-06 | 0.291603234  | 0.849 | 0.943 | 0.027999152 | RPL38      | 5 | NUPRI_LSEC |
| 1151 | 8.83E-11 | 0.29105081   | 0.967 | 0.979 | 1.93E-06    | GAPDH      | 5 | NUPRI_LSEC |
| 1152 | 5.47E-10 | 0.287566253  | 0.937 | 0.956 | 1.19E-05    | RPS10      | 5 | NUPRI_LSEC |
| 1153 | 1.24E-07 | 0.285206669  | 0.745 | 0.887 | 0.00270943  | SUMO2      | 5 | NUPRI_LSEC |
| 1154 | 1.11E-06 | 0.280691685  | 0.87  | 0.921 | 0.024302138 | ACTG1      | 5 | NUPRI_LSEC |
| 1155 | 1.50E-13 | 0.278623817  | 0.971 | 0.988 | 3.27E-09    | EIF1       | 5 | NUPRI_LSEC |
| 1156 | 3.62E-07 | 0.276962045  | 0.904 | 0.938 | 0.007891965 | BTF3       | 5 | NUPRI_LSEC |
| 1157 | 6.08E-08 | 0.265523541  | 0.962 | 0.951 | 0.001325587 | RPL17      | 5 | NUPRI_LSEC |
| 1158 | 1.59E-12 | 0.264866282  | 0.979 | 0.971 | 3.47E-08    | RPL15      | 5 | NUPRI_LSEC |
| 1159 | 1.67E-09 | 0.263983171  | 0.941 | 0.963 | 3.64E-05    | RPL3       | 5 | NUPRI_LSEC |
| 1160 | 5.84E-16 | 0.263097621  | 0.992 | 0.986 | 1.27E-11    | RPS14      | 5 | NUPRI_LSEC |
| 1161 | 2.44E-16 | 0.262771206  | 1     | 0.987 | 5.33E-12    | RPS15A     | 5 | NUPRI_LSEC |
| 1162 | 6.67E-13 | 0.261142267  | 0.992 | 0.986 | 1.45E-08    | RPS24      | 5 | NUPRI_LSEC |
| 1163 | 1.51E-20 | 0.260941613  | 1     | 0.99  | 3.30E-16    | AC090498.1 | 5 | NUPRI_LSEC |
| 1164 | 5.78E-11 | 0.260590072  | 0.967 | 0.977 | 1.26E-06    | RPL37A     | 5 | NUPRI_LSEC |
| 1165 | 1.57E-17 | 0.254139008  | 0.996 | 0.989 | 3.43E-13    | RPL34      | 5 | NUPRI_LSEC |
| 1166 | 1.96E-12 | -0.250118802 | 0.167 | 0.479 | 4.28E-08    | COL4A1     | 5 | NUPRI_LSEC |
| 1167 | 1.47E-09 | -0.250577725 | 0.686 | 0.939 | 3.22E-05    | APP        | 5 | NUPRI_LSEC |
| 1168 | 5.00E-12 | -0.250787643 | 0.389 | 0.808 | 1.09E-07    | SEC14L1    | 5 | NUPRI_LSEC |
| 1169 | 2.46E-17 | -0.251047011 | 0.322 | 0.769 | 5.35E-13    | CDKN1A     | 5 | NUPRI_LSEC |
| 1170 | 3.63E-16 | -0.252813303 | 0.109 | 0.436 | 7.92E-12    | KLF10      | 5 | NUPRI_LSEC |
| 1171 | 2.65E-12 | -0.253535395 | 0.213 | 0.545 | 5.79E-08    | SC5D       | 5 | NUPRI_LSEC |
| 1172 | 1.08E-15 | -0.253843615 | 0.28  | 0.728 | 2.36E-11    | PLSCR1     | 5 | NUPRI_LSEC |
| 1173 | 2.68E-17 | -0.253888958 | 0.268 | 0.732 | 5.84E-13    | TPM3       | 5 | NUPRI_LSEC |
| 1174 | 6.52E-18 | -0.255556228 | 0.126 | 0.491 | 1.42E-13    | TAF1D      | 5 | NUPRI_LSEC |
| 1175 | 3.31E-11 | -0.25658273  | 0.406 | 0.801 | 7.22E-07    | HLA-DRB5   | 5 | NUPRI_LSEC |
| 1176 | 8.10E-12 | -0.25774301  | 0.113 | 0.373 | 1.77E-07    | SLCO4A1    | 5 | NUPRI_LSEC |
| 1177 | 3.78E-11 | -0.258727888 | 0.113 | 0.365 | 8.24E-07    | CPM        | 5 | NUPRI_LSEC |
| 1178 | 1.16E-20 | -0.260220139 | 0.146 | 0.559 | 2.54E-16    | SRRM1      | 5 | NUPRI_LSEC |
| 1179 | 1.84E-19 | -0.262729013 | 0.126 | 0.509 | 4.02E-15    | SRRM2      | 5 | NUPRI_LSEC |
| 1180 | 1.07E-15 | -0.263284684 | 0.159 | 0.521 | 2.34E-11    | SOX7       | 5 | NUPRI_LSEC |
| 1181 | 6.79E-17 | -0.263508616 | 0.146 | 0.509 | 1.48E-12    | IRF1       | 5 | NUPRI_LSEC |
| 1182 | 6.29E-09 | -0.263646412 | 0.289 | 0.593 | 0.000137211 | TFPI2      | 5 | NUPRI_LSEC |
| 1183 | 5.46E-13 | -0.264725486 | 0.188 | 0.527 | 1.19E-08    | IL1R1      | 5 | NUPRI_LSEC |
| 1184 | 2.01E-19 | -0.269256905 | 0.163 | 0.578 | 4.39E-15    | CYB5R3     | 5 | NUPRI_LSEC |
| 1185 | 2.31E-14 | -0.272927917 | 0.1   | 0.394 | 5.05E-10    | TLR4       | 5 | NUPRI_LSEC |
| 1186 | 1.07E-16 | -0.275927346 | 0.159 | 0.528 | 2.34E-12    | MDK        | 5 | NUPRI_LSEC |
| 1187 | 4.44E-19 | -0.276249159 | 0.1   | 0.464 | 9.67E-15    | NDUFS2     | 5 | NUPRI_LSEC |
| 1188 | 1.85E-18 | -0.277663394 | 0.126 | 0.5   | 4.03E-14    | SHISA5     | 5 | NUPRI_LSEC |

|      |          |              |       |       |             |           |   |            |
|------|----------|--------------|-------|-------|-------------|-----------|---|------------|
| 1189 | 1.10E-19 | -0.280013247 | 0.105 | 0.475 | 2.40E-15    | HLA-F     | 5 | NUPRI_LSEC |
| 1190 | 4.33E-17 | -0.28230804  | 0.134 | 0.494 | 9.43E-13    | GNAI2     | 5 | NUPRI_LSEC |
| 1191 | 7.62E-16 | -0.28385987  | 0.364 | 0.814 | 1.66E-11    | ITGB1     | 5 | NUPRI_LSEC |
| 1192 | 3.05E-16 | -0.284211806 | 0.109 | 0.435 | 6.65E-12    | LINC00657 | 5 | NUPRI_LSEC |
| 1193 | 7.91E-21 | -0.285806552 | 0.13  | 0.534 | 1.72E-16    | RBMS1     | 5 | NUPRI_LSEC |
| 1194 | 1.20E-12 | -0.287810199 | 0.397 | 0.785 | 2.62E-08    | PRSS23    | 5 | NUPRI_LSEC |
| 1195 | 2.77E-13 | -0.289664586 | 0.36  | 0.76  | 6.04E-09    | ETS2      | 5 | NUPRI_LSEC |
| 1196 | 2.13E-18 | -0.290267391 | 0.109 | 0.467 | 4.64E-14    | SCAF11    | 5 | NUPRI_LSEC |
| 1197 | 1.55E-16 | -0.290352284 | 0.201 | 0.597 | 3.38E-12    | TMEM50B   | 5 | NUPRI_LSEC |
| 1198 | 6.76E-17 | -0.291532767 | 0.255 | 0.701 | 1.47E-12    | TNFRSF1A  | 5 | NUPRI_LSEC |
| 1199 | 3.40E-18 | -0.293349512 | 0.197 | 0.62  | 7.41E-14    | TMEM50A   | 5 | NUPRI_LSEC |
| 1200 | 8.90E-12 | -0.293812565 | 0.536 | 0.91  | 1.94E-07    | HSP90AB1  | 5 | NUPRI_LSEC |
| 1201 | 8.56E-18 | -0.294261316 | 0.134 | 0.505 | 1.87E-13    | ARL6IP5   | 5 | NUPRI_LSEC |
| 1202 | 6.13E-22 | -0.295396074 | 0.163 | 0.614 | 1.34E-17    | SERBP1    | 5 | NUPRI_LSEC |
| 1203 | 2.31E-18 | -0.2986169   | 0.1   | 0.449 | 5.03E-14    | TMEM30A   | 5 | NUPRI_LSEC |
| 1204 | 2.08E-20 | -0.303185163 | 0.155 | 0.57  | 4.53E-16    | MTDH      | 5 | NUPRI_LSEC |
| 1205 | 1.35E-14 | -0.304808497 | 0.113 | 0.415 | 2.95E-10    | CITED2    | 5 | NUPRI_LSEC |
| 1206 | 1.60E-20 | -0.306238019 | 0.188 | 0.63  | 3.50E-16    | TPST2     | 5 | NUPRI_LSEC |
| 1207 | 3.74E-17 | -0.306593939 | 0.247 | 0.686 | 8.17E-13    | SERPINH1  | 5 | NUPRI_LSEC |
| 1208 | 5.49E-22 | -0.309252159 | 0.13  | 0.544 | 1.20E-17    | TEK       | 5 | NUPRI_LSEC |
| 1209 | 1.55E-20 | -0.309487663 | 0.126 | 0.525 | 3.37E-16    | ASAP1     | 5 | NUPRI_LSEC |
| 1210 | 1.69E-16 | -0.310444127 | 0.109 | 0.437 | 3.69E-12    | ACTN4     | 5 | NUPRI_LSEC |
| 1211 | 2.07E-11 | -0.315600446 | 0.368 | 0.737 | 4.51E-07    | TSC22D3   | 5 | NUPRI_LSEC |
| 1212 | 4.07E-20 | -0.316385926 | 0.138 | 0.538 | 8.89E-16    | CEBPD     | 5 | NUPRI_LSEC |
| 1213 | 1.28E-19 | -0.318479294 | 0.243 | 0.724 | 2.80E-15    | ARL6IP1   | 5 | NUPRI_LSEC |
| 1214 | 3.17E-12 | -0.322315359 | 0.172 | 0.465 | 6.92E-08    | OLFM1     | 5 | NUPRI_LSEC |
| 1215 | 7.77E-17 | -0.324827345 | 0.887 | 0.967 | 1.69E-12    | HLA-E     | 5 | NUPRI_LSEC |
| 1216 | 3.33E-18 | -0.326180686 | 0.326 | 0.816 | 7.27E-14    | LAPTM4A   | 5 | NUPRI_LSEC |
| 1217 | 3.08E-21 | -0.329281481 | 0.222 | 0.706 | 6.72E-17    | EIF4A2    | 5 | NUPRI_LSEC |
| 1218 | 3.24E-20 | -0.329707049 | 0.276 | 0.76  | 7.07E-16    | MEF2C     | 5 | NUPRI_LSEC |
| 1219 | 2.11E-16 | -0.333051985 | 0.234 | 0.651 | 4.61E-12    | ARHGAP29  | 5 | NUPRI_LSEC |
| 1220 | 2.53E-15 | -0.33590588  | 0.167 | 0.511 | 5.51E-11    | SOX17     | 5 | NUPRI_LSEC |
| 1221 | 3.84E-19 | -0.3360494   | 0.197 | 0.627 | 8.38E-15    | HNRNPU    | 5 | NUPRI_LSEC |
| 1222 | 1.59E-11 | -0.337755397 | 0.427 | 0.773 | 3.46E-07    | ZFP36L1   | 5 | NUPRI_LSEC |
| 1223 | 7.90E-17 | -0.338337703 | 0.28  | 0.726 | 1.72E-12    | TACC1     | 5 | NUPRI_LSEC |
| 1224 | 5.44E-21 | -0.339731133 | 0.925 | 0.99  | 1.19E-16    | HLA-B     | 5 | NUPRI_LSEC |
| 1225 | 7.49E-10 | -0.343901839 | 0.13  | 0.365 | 1.63E-05    | HLA-DRA   | 5 | NUPRI_LSEC |
| 1226 | 9.88E-19 | -0.346862941 | 0.243 | 0.686 | 2.15E-14    | TUBA1B    | 5 | NUPRI_LSEC |
| 1227 | 5.31E-21 | -0.347336883 | 0.109 | 0.491 | 1.16E-16    | PIK3C2A   | 5 | NUPRI_LSEC |
| 1228 | 3.27E-14 | -0.356033605 | 0.481 | 0.889 | 7.13E-10    | STOM      | 5 | NUPRI_LSEC |
| 1229 | 1.23E-10 | -0.362418353 | 0.544 | 0.84  | 2.69E-06    | ID3       | 5 | NUPRI_LSEC |
| 1230 | 1.14E-17 | -0.363184973 | 0.201 | 0.599 | 2.48E-13    | PMP22     | 5 | NUPRI_LSEC |
| 1231 | 1.94E-19 | -0.364334374 | 0.155 | 0.552 | 4.22E-15    | NRP1      | 5 | NUPRI_LSEC |
| 1232 | 2.13E-18 | -0.36866736  | 0.167 | 0.564 | 4.65E-14    | YES1      | 5 | NUPRI_LSEC |
| 1233 | 5.14E-21 | -0.371246778 | 0.142 | 0.547 | 1.12E-16    | CDC42EP3  | 5 | NUPRI_LSEC |
| 1234 | 1.43E-27 | -0.375999655 | 0.134 | 0.614 | 3.11E-23    | SF3B1     | 5 | NUPRI_LSEC |
| 1235 | 3.33E-13 | -0.377193054 | 0.234 | 0.572 | 7.27E-09    | ICAM1     | 5 | NUPRI_LSEC |
| 1236 | 8.64E-22 | -0.380635299 | 0.109 | 0.504 | 1.88E-17    | TNFSF10   | 5 | NUPRI_LSEC |
| 1237 | 1.38E-21 | -0.382255002 | 0.121 | 0.525 | 3.00E-17    | CTNNB1    | 5 | NUPRI_LSEC |
| 1238 | 1.09E-20 | -0.383211348 | 0.18  | 0.618 | 2.38E-16    | EIF5      | 5 | NUPRI_LSEC |
| 1239 | 1.23E-18 | -0.387415614 | 0.276 | 0.722 | 2.69E-14    | LDHA      | 5 | NUPRI_LSEC |
| 1240 | 3.28E-17 | -0.388217233 | 0.276 | 0.711 | 7.16E-13    | S1PR1     | 5 | NUPRI_LSEC |
| 1241 | 4.94E-21 | -0.394460255 | 0.151 | 0.568 | 1.08E-16    | ITM2A     | 5 | NUPRI_LSEC |
| 1242 | 6.90E-20 | -0.397503138 | 0.109 | 0.479 | 1.50E-15    | GAS6      | 5 | NUPRI_LSEC |
| 1243 | 4.61E-22 | -0.399372877 | 0.268 | 0.761 | 1.00E-17    | MCL1      | 5 | NUPRI_LSEC |
| 1244 | 2.03E-25 | -0.401634866 | 0.121 | 0.572 | 4.43E-21    | SERINC3   | 5 | NUPRI_LSEC |
| 1245 | 8.73E-21 | -0.4017393   | 0.226 | 0.688 | 1.90E-16    | TGFBR3    | 5 | NUPRI_LSEC |
| 1246 | 1.30E-21 | -0.402805716 | 0.105 | 0.491 | 2.83E-17    | SNRK      | 5 | NUPRI_LSEC |
| 1247 | 7.74E-23 | -0.403014867 | 0.243 | 0.739 | 1.69E-18    | CDH5      | 5 | NUPRI_LSEC |
| 1248 | 2.59E-12 | -0.404688162 | 0.192 | 0.49  | 5.65E-08    | PNP       | 5 | NUPRI_LSEC |
| 1249 | 4.69E-23 | -0.405472849 | 0.222 | 0.713 | 1.02E-18    | NCL       | 5 | NUPRI_LSEC |
| 1250 | 1.33E-20 | -0.405485881 | 0.109 | 0.478 | 2.89E-16    | DDX21     | 5 | NUPRI_LSEC |
| 1251 | 4.42E-14 | -0.407623203 | 0.331 | 0.733 | 9.64E-10    | CRIP2     | 5 | NUPRI_LSEC |
| 1252 | 3.74E-18 | -0.407796156 | 0.31  | 0.747 | 8.15E-14    | ADGRF5    | 5 | NUPRI_LSEC |
| 1253 | 3.96E-19 | -0.40854793  | 0.155 | 0.546 | 8.63E-15    | BMPER     | 5 | NUPRI_LSEC |
| 1254 | 9.28E-21 | -0.408763233 | 0.247 | 0.703 | 2.02E-16    | DLC1      | 5 | NUPRI_LSEC |
| 1255 | 1.01E-08 | -0.409254416 | 0.686 | 0.94  | 0.000220261 | SAT1      | 5 | NUPRI_LSEC |
| 1256 | 4.99E-26 | -0.412628908 | 0.176 | 0.669 | 1.09E-21    | UBXN4     | 5 | NUPRI_LSEC |
| 1257 | 1.37E-24 | -0.413214052 | 0.13  | 0.568 | 2.99E-20    | DENND4C   | 5 | NUPRI_LSEC |
| 1258 | 7.20E-18 | -0.415690497 | 0.142 | 0.506 | 1.57E-13    | CD93      | 5 | NUPRI_LSEC |



|      |          |              |       |       |          |            |   |            |
|------|----------|--------------|-------|-------|----------|------------|---|------------|
| 1259 | 5.12E-27 | -0.418407988 | 0.155 | 0.646 | 1.12E-22 | SF1        | 5 | NUPRI_LSEC |
| 1260 | 6.34E-17 | -0.419247987 | 0.335 | 0.756 | 1.38E-12 | HYAL2      | 5 | NUPRI_LSEC |
| 1261 | 2.83E-26 | -0.423092302 | 0.222 | 0.741 | 6.18E-22 | RAB13      | 5 | NUPRI_LSEC |
| 1262 | 1.30E-20 | -0.429106813 | 0.335 | 0.826 | 2.83E-16 | CDC37      | 5 | NUPRI_LSEC |
| 1263 | 2.18E-13 | -0.429799561 | 0.502 | 0.834 | 4.76E-09 | RNASE1     | 5 | NUPRI_LSEC |
| 1264 | 1.62E-12 | -0.430604084 | 0.523 | 0.887 | 3.53E-08 | NFKBIA     | 5 | NUPRI_LSEC |
| 1265 | 2.54E-24 | -0.430633064 | 0.155 | 0.609 | 5.54E-20 | CALM2      | 5 | NUPRI_LSEC |
| 1266 | 2.92E-24 | -0.431266881 | 0.163 | 0.627 | 6.38E-20 | CD46       | 5 | NUPRI_LSEC |
| 1267 | 4.78E-27 | -0.431515675 | 0.142 | 0.625 | 1.04E-22 | SERINC1    | 5 | NUPRI_LSEC |
| 1268 | 1.36E-19 | -0.436769443 | 0.322 | 0.79  | 2.97E-15 | EPAS1      | 5 | NUPRI_LSEC |
| 1269 | 5.98E-14 | -0.439168059 | 0.351 | 0.698 | 1.30E-09 | ADM        | 5 | NUPRI_LSEC |
| 1270 | 1.74E-23 | -0.439653322 | 0.146 | 0.583 | 3.80E-19 | ACTN1      | 5 | NUPRI_LSEC |
| 1271 | 2.56E-25 | -0.44335946  | 0.121 | 0.561 | 5.58E-21 | EIF4A1     | 5 | NUPRI_LSEC |
| 1272 | 1.76E-20 | -0.443660804 | 0.18  | 0.597 | 3.84E-16 | EFNB1      | 5 | NUPRI_LSEC |
| 1273 | 5.34E-25 | -0.44501691  | 0.117 | 0.551 | 1.16E-20 | ZFAND5     | 5 | NUPRI_LSEC |
| 1274 | 4.77E-19 | -0.44994155  | 0.577 | 0.908 | 1.04E-14 | EGFL7      | 5 | NUPRI_LSEC |
| 1275 | 2.82E-27 | -0.453179911 | 0.213 | 0.741 | 6.14E-23 | SRSF5      | 5 | NUPRI_LSEC |
| 1276 | 3.41E-22 | -0.453437718 | 0.36  | 0.838 | 7.43E-18 | ANXA2      | 5 | NUPRI_LSEC |
| 1277 | 5.58E-28 | -0.455258023 | 0.782 | 0.984 | 1.22E-23 | PTMA       | 5 | NUPRI_LSEC |
| 1278 | 3.61E-13 | -0.456645615 | 0.464 | 0.817 | 7.86E-09 | A2M        | 5 | NUPRI_LSEC |
| 1279 | 2.38E-27 | -0.457333201 | 0.142 | 0.621 | 5.20E-23 | TIE1       | 5 | NUPRI_LSEC |
| 1280 | 4.36E-20 | -0.458942455 | 0.406 | 0.851 | 9.52E-16 | TINAGL1    | 5 | NUPRI_LSEC |
| 1281 | 6.19E-21 | -0.460105976 | 0.113 | 0.496 | 1.35E-16 | NEDD9      | 5 | NUPRI_LSEC |
| 1282 | 3.27E-23 | -0.462006149 | 0.665 | 0.957 | 7.12E-19 | H3F3B      | 5 | NUPRI_LSEC |
| 1283 | 5.77E-20 | -0.463607421 | 0.628 | 0.946 | 1.26E-15 | UBC        | 5 | NUPRI_LSEC |
| 1284 | 3.08E-28 | -0.463760704 | 0.159 | 0.66  | 6.72E-24 | ANP32B     | 5 | NUPRI_LSEC |
| 1285 | 2.38E-26 | -0.46716384  | 0.105 | 0.547 | 5.18E-22 | VIMP       | 5 | NUPRI_LSEC |
| 1286 | 2.21E-16 | -0.475296477 | 0.464 | 0.882 | 4.81E-12 | HSPG2      | 5 | NUPRI_LSEC |
| 1287 | 8.61E-11 | -0.476148463 | 0.427 | 0.72  | 1.88E-06 | C7         | 5 | NUPRI_LSEC |
| 1288 | 3.64E-26 | -0.479313633 | 0.184 | 0.675 | 7.94E-22 | RTN4       | 5 | NUPRI_LSEC |
| 1289 | 1.32E-28 | -0.48080417  | 0.1   | 0.559 | 2.88E-24 | TUBB4B     | 5 | NUPRI_LSEC |
| 1290 | 8.06E-23 | -0.481525233 | 0.117 | 0.526 | 1.76E-18 | TMEM2      | 5 | NUPRI_LSEC |
| 1291 | 6.24E-26 | -0.484355596 | 0.1   | 0.531 | 1.36E-21 | ERG        | 5 | NUPRI_LSEC |
| 1292 | 2.04E-14 | -0.49302236  | 0.381 | 0.766 | 4.44E-10 | CD74       | 5 | NUPRI_LSEC |
| 1293 | 8.24E-29 | -0.505152118 | 0.117 | 0.593 | 1.80E-24 | SFPQ       | 5 | NUPRI_LSEC |
| 1294 | 3.71E-30 | -0.516297398 | 0.121 | 0.61  | 8.09E-26 | PTTG1IP    | 5 | NUPRI_LSEC |
| 1295 | 9.96E-27 | -0.516786584 | 0.653 | 0.99  | 2.17E-22 | MT-ND3     | 5 | NUPRI_LSEC |
| 1296 | 8.55E-30 | -0.518625483 | 0.159 | 0.658 | 1.87E-25 | DDX3X      | 5 | NUPRI_LSEC |
| 1297 | 1.34E-19 | -0.522523778 | 0.134 | 0.508 | 2.92E-15 | C11orf96   | 5 | NUPRI_LSEC |
| 1298 | 3.29E-13 | -0.53154317  | 0.678 | 0.929 | 7.18E-09 | TIMP3      | 5 | NUPRI_LSEC |
| 1299 | 1.23E-29 | -0.534333037 | 0.126 | 0.617 | 2.68E-25 | STAT3      | 5 | NUPRI_LSEC |
| 1300 | 1.44E-32 | -0.545071151 | 0.163 | 0.702 | 3.14E-28 | KTN1       | 5 | NUPRI_LSEC |
| 1301 | 2.21E-25 | -0.54839954  | 0.314 | 0.813 | 4.83E-21 | PTPRB      | 5 | NUPRI_LSEC |
| 1302 | 1.57E-11 | -0.548736487 | 0.155 | 0.415 | 3.42E-07 | CCL2       | 5 | NUPRI_LSEC |
| 1303 | 1.65E-30 | -0.553210719 | 0.218 | 0.765 | 3.60E-26 | RBM39      | 5 | NUPRI_LSEC |
| 1304 | 6.72E-32 | -0.563912389 | 0.201 | 0.743 | 1.47E-27 | HNRNPA1    | 5 | NUPRI_LSEC |
| 1305 | 9.45E-23 | -0.564407454 | 0.435 | 0.872 | 2.06E-18 | CLEC3B     | 5 | NUPRI_LSEC |
| 1306 | 1.90E-35 | -0.572397284 | 0.745 | 0.996 | 4.15E-31 | MT-CO3     | 5 | NUPRI_LSEC |
| 1307 | 1.18E-26 | -0.576399815 | 0.126 | 0.574 | 2.57E-22 | EFNB2      | 5 | NUPRI_LSEC |
| 1308 | 1.38E-24 | -0.580724326 | 0.226 | 0.685 | 3.01E-20 | ID2        | 5 | NUPRI_LSEC |
| 1309 | 7.71E-31 | -0.580946863 | 0.167 | 0.684 | 1.68E-26 | ESAM       | 5 | NUPRI_LSEC |
| 1310 | 6.62E-28 | -0.581118023 | 0.126 | 0.59  | 1.44E-23 | PLK2       | 5 | NUPRI_LSEC |
| 1311 | 6.29E-20 | -0.582860609 | 0.268 | 0.699 | 1.37E-15 | RAMP2      | 5 | NUPRI_LSEC |
| 1312 | 1.78E-28 | -0.590982385 | 0.519 | 0.976 | 3.88E-24 | MT-ND4     | 5 | NUPRI_LSEC |
| 1313 | 2.20E-26 | -0.592918557 | 0.126 | 0.571 | 4.79E-22 | MT-ND6     | 5 | NUPRI_LSEC |
| 1314 | 1.28E-30 | -0.593941029 | 0.151 | 0.66  | 2.79E-26 | ST6GALNAC3 | 5 | NUPRI_LSEC |
| 1315 | 7.37E-25 | -0.599074062 | 0.159 | 0.603 | 1.61E-20 | KLF2       | 5 | NUPRI_LSEC |
| 1316 | 8.71E-28 | -0.600972757 | 0.1   | 0.546 | 1.90E-23 | ATF3       | 5 | NUPRI_LSEC |
| 1317 | 1.25E-31 | -0.602391356 | 0.1   | 0.583 | 2.72E-27 | CYYR1      | 5 | NUPRI_LSEC |
| 1318 | 1.66E-34 | -0.607612563 | 0.351 | 0.906 | 3.62E-30 | DDX5       | 5 | NUPRI_LSEC |
| 1319 | 9.32E-25 | -0.609289889 | 0.117 | 0.53  | 2.03E-20 | SOX4       | 5 | NUPRI_LSEC |
| 1320 | 5.70E-35 | -0.620061201 | 0.113 | 0.639 | 1.24E-30 | N4BP2L2    | 5 | NUPRI_LSEC |
| 1321 | 3.50E-29 | -0.631963294 | 0.172 | 0.669 | 7.64E-25 | EMCN       | 5 | NUPRI_LSEC |
| 1322 | 9.06E-34 | -0.633706032 | 0.423 | 0.961 | 1.98E-29 | MT-ND5     | 5 | NUPRI_LSEC |
| 1323 | 2.34E-17 | -0.636955748 | 0.188 | 0.542 | 5.11E-13 | GJA4       | 5 | NUPRI_LSEC |
| 1324 | 1.70E-20 | -0.640036506 | 0.117 | 0.48  | 3.72E-16 | EDNRB      | 5 | NUPRI_LSEC |
| 1325 | 7.01E-35 | -0.661085604 | 0.1   | 0.614 | 1.53E-30 | SRSF3      | 5 | NUPRI_LSEC |
| 1326 | 2.36E-28 | -0.670970277 | 0.209 | 0.71  | 5.15E-24 | CAV1       | 5 | NUPRI_LSEC |
| 1327 | 1.05E-37 | -0.685764943 | 0.134 | 0.688 | 2.29E-33 | SRSF11     | 5 | NUPRI_LSEC |
| 1328 | 1.18E-24 | -0.68779186  | 0.51  | 0.914 | 2.57E-20 | ID1        | 5 | NUPRI_LSEC |

|      |           |              |       |       |           |           |   |            |
|------|-----------|--------------|-------|-------|-----------|-----------|---|------------|
| 1329 | 2.45E-31  | -0.68942716  | 0.251 | 0.756 | 5.34E-27  | DUSP6     | 5 | NUPR1_LSEC |
| 1330 | 4.01E-36  | -0.690692916 | 0.126 | 0.662 | 8.75E-32  | BHLHE40   | 5 | NUPR1_LSEC |
| 1331 | 8.93E-21  | -0.700820135 | 0.184 | 0.581 | 1.95E-16  | LMNA      | 5 | NUPR1_LSEC |
| 1332 | 9.94E-33  | -0.701888938 | 0.18  | 0.703 | 2.17E-28  | EFNA1     | 5 | NUPR1_LSEC |
| 1333 | 2.43E-36  | -0.704272871 | 0.201 | 0.766 | 5.31E-32  | RDX       | 5 | NUPR1_LSEC |
| 1334 | 1.08E-24  | -0.7078232   | 0.205 | 0.645 | 2.35E-20  | C8orf4    | 5 | NUPR1_LSEC |
| 1335 | 2.52E-27  | -0.709707889 | 0.105 | 0.539 | 5.49E-23  | MYADM     | 5 | NUPR1_LSEC |
| 1336 | 3.42E-38  | -0.713236489 | 0.64  | 0.991 | 7.45E-34  | MT-ATP6   | 5 | NUPR1_LSEC |
| 1337 | 4.15E-34  | -0.71488619  | 0.226 | 0.771 | 9.04E-30  | FLT1      | 5 | NUPR1_LSEC |
| 1338 | 5.00E-26  | -0.715335943 | 0.444 | 0.843 | 1.09E-21  | PLPP3     | 5 | NUPR1_LSEC |
| 1339 | 6.39E-27  | -0.716690648 | 0.192 | 0.642 | 1.39E-22  | MYC       | 5 | NUPR1_LSEC |
| 1340 | 1.02E-41  | -0.718775003 | 0.594 | 0.992 | 2.23E-37  | MT-ND4L   | 5 | NUPR1_LSEC |
| 1341 | 3.13E-46  | -0.720173905 | 0.841 | 0.999 | 6.82E-42  | MT-CO2    | 5 | NUPR1_LSEC |
| 1342 | 2.22E-34  | -0.724659559 | 0.109 | 0.615 | 4.83E-30  | NOTCH4    | 5 | NUPR1_LSEC |
| 1343 | 4.98E-40  | -0.725003026 | 0.197 | 0.775 | 1.09E-35  | PPP1R15A  | 5 | NUPR1_LSEC |
| 1344 | 5.45E-28  | -0.740529075 | 0.159 | 0.625 | 1.19E-23  | NR4A1     | 5 | NUPR1_LSEC |
| 1345 | 1.76E-41  | -0.761788205 | 0.197 | 0.799 | 3.85E-37  | PPFIBP1   | 5 | NUPR1_LSEC |
| 1346 | 1.02E-25  | -0.76288291  | 0.159 | 0.585 | 2.22E-21  | BGN       | 5 | NUPR1_LSEC |
| 1347 | 1.70E-20  | -0.780946718 | 0.176 | 0.544 | 3.70E-16  | IGFBP3    | 5 | NUPR1_LSEC |
| 1348 | 2.63E-18  | -0.781853936 | 0.226 | 0.593 | 5.75E-14  | SLC9A3R2  | 5 | NUPR1_LSEC |
| 1349 | 5.10E-32  | -0.784888337 | 0.184 | 0.687 | 1.11E-27  | SRPX      | 5 | NUPR1_LSEC |
| 1350 | 1.89E-39  | -0.795561542 | 0.146 | 0.717 | 4.12E-35  | TCF4      | 5 | NUPR1_LSEC |
| 1351 | 5.95E-35  | -0.79863425  | 0.402 | 0.885 | 1.30E-30  | IFITM1    | 5 | NUPR1_LSEC |
| 1352 | 3.16E-26  | -0.802772695 | 0.36  | 0.805 | 6.88E-22  | DDIT4     | 5 | NUPR1_LSEC |
| 1353 | 1.25E-42  | -0.807298759 | 0.452 | 0.971 | 2.73E-38  | MT-ATP8   | 5 | NUPR1_LSEC |
| 1354 | 8.40E-35  | -0.809191976 | 0.126 | 0.639 | 1.83E-30  | ZFP36L2   | 5 | NUPR1_LSEC |
| 1355 | 4.76E-35  | -0.824484009 | 0.397 | 0.883 | 1.04E-30  | SRGN      | 5 | NUPR1_LSEC |
| 1356 | 2.57E-48  | -0.828523515 | 0.1   | 0.717 | 5.60E-44  | SPTBN1    | 5 | NUPR1_LSEC |
| 1357 | 1.12E-45  | -0.844573695 | 0.414 | 0.974 | 2.43E-41  | MT-ND1    | 5 | NUPR1_LSEC |
| 1358 | 2.18E-43  | -0.847384337 | 0.1   | 0.672 | 4.74E-39  | JMJD1C    | 5 | NUPR1_LSEC |
| 1359 | 2.05E-54  | -0.847518809 | 0.791 | 0.997 | 4.46E-50  | MT-CO1    | 5 | NUPR1_LSEC |
| 1360 | 2.14E-51  | -0.870259091 | 0.556 | 0.991 | 4.66E-47  | MT-CYB    | 5 | NUPR1_LSEC |
| 1361 | 2.80E-31  | -0.880693562 | 0.385 | 0.829 | 6.10E-27  | RHOB      | 5 | NUPR1_LSEC |
| 1362 | 9.38E-45  | -0.886009595 | 0.389 | 0.965 | 2.05E-40  | MT-ND2    | 5 | NUPR1_LSEC |
| 1363 | 2.65E-38  | -0.88980564  | 0.251 | 0.797 | 5.77E-34  | KLF6      | 5 | NUPR1_LSEC |
| 1364 | 1.34E-51  | -0.907946976 | 0.222 | 0.871 | 2.93E-47  | HNRNPA2B1 | 5 | NUPR1_LSEC |
| 1365 | 2.08E-40  | -0.914588114 | 0.322 | 0.877 | 4.53E-36  | CALCRL    | 5 | NUPR1_LSEC |
| 1366 | 2.62E-47  | -0.925130928 | 0.205 | 0.832 | 5.71E-43  | SLC38A2   | 5 | NUPR1_LSEC |
| 1367 | 1.28E-43  | -0.931527677 | 0.201 | 0.79  | 2.79E-39  | PECAM1    | 5 | NUPR1_LSEC |
| 1368 | 3.36E-39  | -0.950822227 | 0.197 | 0.747 | 7.32E-35  | CLEC14A   | 5 | NUPR1_LSEC |
| 1369 | 3.47E-35  | -1.003649418 | 0.301 | 0.834 | 7.56E-31  | PLPP1     | 5 | NUPR1_LSEC |
| 1370 | 7.80E-59  | -1.066255656 | 0.113 | 0.795 | 1.70E-54  | WSB1      | 5 | NUPR1_LSEC |
| 1371 | 8.63E-47  | -1.070187779 | 0.623 | 0.963 | 1.88E-42  | TM4SF1    | 5 | NUPR1_LSEC |
| 1372 | 5.95E-50  | -1.085414455 | 0.326 | 0.888 | 1.30E-45  | CD9       | 5 | NUPR1_LSEC |
| 1373 | 5.25E-20  | -1.102723292 | 0.268 | 0.655 | 1.14E-15  | S100A6    | 5 | NUPR1_LSEC |
| 1374 | 3.88E-62  | -1.109862591 | 0.146 | 0.857 | 8.47E-58  | ARGLU1    | 5 | NUPR1_LSEC |
| 1375 | 1.60E-39  | -1.132057245 | 0.31  | 0.8   | 3.50E-35  | AKAP12    | 5 | NUPR1_LSEC |
| 1376 | 8.20E-42  | -1.14686785  | 0.142 | 0.686 | 1.79E-37  | EGR1      | 5 | NUPR1_LSEC |
| 1377 | 1.47E-37  | -1.17021313  | 0.13  | 0.655 | 3.20E-33  | GSN       | 5 | NUPR1_LSEC |
| 1378 | 2.90E-63  | -1.182848643 | 0.46  | 0.948 | 6.33E-59  | DUSP1     | 5 | NUPR1_LSEC |
| 1379 | 2.69E-57  | -1.203234776 | 0.243 | 0.855 | 5.86E-53  | SOCS3     | 5 | NUPR1_LSEC |
| 1380 | 1.19E-63  | -1.271207848 | 0.117 | 0.808 | 2.60E-59  | KLF4      | 5 | NUPR1_LSEC |
| 1381 | 6.02E-57  | -1.33848013  | 0.28  | 0.862 | 1.31E-52  | GADD45B   | 5 | NUPR1_LSEC |
| 1382 | 2.04E-61  | -1.411671884 | 0.109 | 0.771 | 4.44E-57  | FOSB      | 5 | NUPR1_LSEC |
| 1383 | 7.72E-70  | -1.422202057 | 0.176 | 0.874 | 1.68E-65  | SLC2A3    | 5 | NUPR1_LSEC |
| 1384 | 7.42E-76  | -1.53853717  | 0.218 | 0.908 | 1.62E-71  | IER2      | 5 | NUPR1_LSEC |
| 1385 | 1.55E-40  | -1.674141113 | 0.113 | 0.621 | 3.38E-36  | CXCL2     | 5 | NUPR1_LSEC |
| 1386 | 6.39E-81  | -1.710127985 | 0.326 | 0.929 | 1.39E-76  | JUN       | 5 | NUPR1_LSEC |
| 1387 | 2.02E-83  | -1.719424853 | 0.255 | 0.93  | 4.40E-79  | ZFP36     | 5 | NUPR1_LSEC |
| 1388 | 1.05E-97  | -2.038927512 | 0.272 | 0.941 | 2.29E-93  | JUNB      | 5 | NUPR1_LSEC |
| 1389 | 6.74E-76  | -2.207319691 | 0.251 | 0.887 | 1.47E-71  | VIM       | 5 | NUPR1_LSEC |
| 1390 | 1.13E-99  | -2.235611285 | 0.31  | 0.954 | 2.46E-95  | FOS       | 5 | NUPR1_LSEC |
| 1391 | 1.39E-118 | -2.388915011 | 0.347 | 0.997 | 3.04E-114 | MALAT1    | 5 | NUPR1_LSEC |
| 1392 | 4.84E-161 | 2.532401693  | 0.704 | 0.048 | 1.06E-156 | RBP7      | 6 | RBP7_VEC   |
| 1393 | 6.94E-91  | 2.019384033  | 0.961 | 0.541 | 1.51E-86  | GSN       | 6 | RBP7_VEC   |
| 1394 | 5.49E-69  | 1.920529025  | 0.453 | 0.058 | 1.20E-64  | RGCC      | 6 | RBP7_VEC   |
| 1395 | 3.03E-75  | 1.8699271    | 0.508 | 0.071 | 6.62E-71  | CXCL12    | 6 | RBP7_VEC   |
| 1396 | 1.15E-58  | 1.7510969    | 0.793 | 0.325 | 2.52E-54  | PLVAP     | 6 | RBP7_VEC   |
| 1397 | 6.02E-44  | 1.665842727  | 0.804 | 0.514 | 1.31E-39  | SLC9A3R2  | 6 | RBP7_VEC   |
| 1398 | 9.60E-27  | 1.636333268  | 0.268 | 0.052 | 2.09E-22  | IGF2      | 6 | RBP7_VEC   |

|      |           |             |       |       |             |          |   |          |
|------|-----------|-------------|-------|-------|-------------|----------|---|----------|
| 1399 | 2.76E-67  | 1.63320792  | 0.804 | 0.243 | 6.02E-63    | SPARCL1  | 6 | RBP7_VEC |
| 1400 | 7.41E-59  | 1.626066747 | 0.939 | 0.565 | 1.62E-54    | S100A6   | 6 | RBP7_VEC |
| 1401 | 2.57E-43  | 1.510984127 | 0.939 | 0.742 | 5.61E-39    | PLPP1    | 6 | RBP7_VEC |
| 1402 | 9.20E-43  | 1.431276337 | 0.922 | 0.691 | 2.01E-38    | CD74     | 6 | RBP7_VEC |
| 1403 | 1.42E-110 | 1.417633244 | 0.514 | 0.035 | 3.09E-106   | LMCD1    | 6 | RBP7_VEC |
| 1404 | 7.50E-41  | 1.406363969 | 0.62  | 0.229 | 1.64E-36    | SPRY1    | 6 | RBP7_VEC |
| 1405 | 1.45E-23  | 1.402204507 | 0.469 | 0.193 | 3.15E-19    | C10orf10 | 6 | RBP7_VEC |
| 1406 | 1.03E-74  | 1.394871635 | 0.749 | 0.169 | 2.25E-70    | AQP1     | 6 | RBP7_VEC |
| 1407 | 5.74E-34  | 1.387467318 | 0.156 | 0.009 | 1.25E-29    | FABP4    | 6 | RBP7_VEC |
| 1408 | 3.24E-46  | 1.361175845 | 0.425 | 0.081 | 7.07E-42    | CRIP1    | 6 | RBP7_VEC |
| 1409 | 4.23E-33  | 1.292020843 | 0.966 | 0.887 | 9.23E-29    | TIMP3    | 6 | RBP7_VEC |
| 1410 | 4.06E-64  | 1.267365527 | 0.665 | 0.16  | 8.86E-60    | CD34     | 6 | RBP7_VEC |
| 1411 | 2.25E-60  | 1.251184709 | 0.939 | 0.649 | 4.90E-56    | CRIP2    | 6 | RBP7_VEC |
| 1412 | 1.16E-30  | 1.247134069 | 0.933 | 0.87  | 2.53E-26    | SRP14    | 6 | RBP7_VEC |
| 1413 | 3.16E-63  | 1.214908213 | 0.95  | 0.683 | 6.89E-59    | PECAM1   | 6 | RBP7_VEC |
| 1414 | 2.36E-51  | 1.203906828 | 0.67  | 0.22  | 5.15E-47    | PODXL    | 6 | RBP7_VEC |
| 1415 | 2.73E-117 | 1.198418764 | 0.341 | 0.002 | 5.96E-113   | SSUH2    | 6 | RBP7_VEC |
| 1416 | 2.58E-74  | 1.187412118 | 0.57  | 0.096 | 5.62E-70    | PRKCDBP  | 6 | RBP7_VEC |
| 1417 | 7.50E-83  | 1.187220632 | 0.609 | 0.093 | 1.64E-78    | PALMD    | 6 | RBP7_VEC |
| 1418 | 7.44E-12  | 1.164888162 | 0.631 | 0.494 | 1.62E-07    | GLUL     | 6 | RBP7_VEC |
| 1419 | 6.34E-54  | 1.156929048 | 0.207 | 0.008 | 1.38E-49    | IGFBP5   | 6 | RBP7_VEC |
| 1420 | 4.60E-42  | 1.148839462 | 0.872 | 0.615 | 1.00E-37    | RAMP2    | 6 | RBP7_VEC |
| 1421 | 2.86E-80  | 1.134951224 | 0.425 | 0.037 | 6.25E-76    | SLC6A6   | 6 | RBP7_VEC |
| 1422 | 5.33E-56  | 1.124346431 | 0.642 | 0.179 | 1.16E-51    | LGALS3   | 6 | RBP7_VEC |
| 1423 | 2.94E-29  | 1.102702481 | 0.631 | 0.3   | 6.42E-25    | HLA-DRA  | 6 | RBP7_VEC |
| 1424 | 3.70E-52  | 1.087535832 | 0.939 | 0.703 | 8.07E-48    | EPAS1    | 6 | RBP7_VEC |
| 1425 | 1.14E-40  | 1.055126612 | 0.849 | 0.567 | 2.50E-36    | TAGLN2   | 6 | RBP7_VEC |
| 1426 | 3.22E-45  | 1.054783951 | 0.777 | 0.388 | 7.03E-41    | BCAM     | 6 | RBP7_VEC |
| 1427 | 1.63E-50  | 1.048199106 | 0.531 | 0.125 | 3.55E-46    | ASS1     | 6 | RBP7_VEC |
| 1428 | 3.01E-36  | 1.038509666 | 0.855 | 0.618 | 6.57E-32    | CAV1     | 6 | RBP7_VEC |
| 1429 | 1.64E-51  | 1.01463319  | 1     | 0.779 | 3.58E-47    | VIM      | 6 | RBP7_VEC |
| 1430 | 4.36E-34  | 1.004198521 | 0.587 | 0.234 | 9.51E-30    | FAM107A  | 6 | RBP7_VEC |
| 1431 | 1.26E-28  | 0.997415677 | 0.447 | 0.147 | 2.74E-24    | JAG1     | 6 | RBP7_VEC |
| 1432 | 1.24E-49  | 0.993787871 | 0.547 | 0.136 | 2.69E-45    | MTUS1    | 6 | RBP7_VEC |
| 1433 | 1.09E-07  | 0.983383033 | 0.112 | 0.032 | 0.002385205 | ACKR1    | 6 | RBP7_VEC |
| 1434 | 1.11E-28  | 0.962169035 | 0.598 | 0.285 | 2.42E-24    | ADAM15   | 6 | RBP7_VEC |
| 1435 | 1.10E-35  | 0.956911898 | 0.698 | 0.319 | 2.39E-31    | PIK3R3   | 6 | RBP7_VEC |
| 1436 | 3.75E-59  | 0.951864155 | 0.201 | 0.004 | 8.18E-55    | FMO2     | 6 | RBP7_VEC |
| 1437 | 1.82E-33  | 0.945744028 | 0.587 | 0.214 | 3.96E-29    | SLCO2A1  | 6 | RBP7_VEC |
| 1438 | 1.23E-92  | 0.933676117 | 0.436 | 0.029 | 2.68E-88    | SORBS2   | 6 | RBP7_VEC |
| 1439 | 2.14E-118 | 0.92435585  | 0.408 | 0.01  | 4.67E-114   | CHRM3    | 6 | RBP7_VEC |
| 1440 | 2.18E-49  | 0.917129548 | 0.475 | 0.098 | 4.76E-45    | TMEM47   | 6 | RBP7_VEC |
| 1441 | 1.25E-32  | 0.911983218 | 0.453 | 0.134 | 2.73E-28    | PPA1     | 6 | RBP7_VEC |
| 1442 | 1.16E-15  | 0.910814331 | 0.38  | 0.165 | 2.54E-11    | PLAT     | 6 | RBP7_VEC |
| 1443 | 1.32E-13  | 0.905629338 | 0.547 | 0.311 | 2.88E-09    | VWF      | 6 | RBP7_VEC |
| 1444 | 7.90E-24  | 0.903821394 | 0.587 | 0.302 | 1.72E-19    | UTRN     | 6 | RBP7_VEC |
| 1445 | 1.73E-11  | 0.896637667 | 0.615 | 0.48  | 3.77E-07    | GJA4     | 6 | RBP7_VEC |
| 1446 | 4.75E-29  | 0.893080733 | 0.559 | 0.214 | 1.04E-24    | ALPL     | 6 | RBP7_VEC |
| 1447 | 8.00E-12  | 0.887025417 | 0.24  | 0.087 | 1.75E-07    | FABP5    | 6 | RBP7_VEC |
| 1448 | 1.22E-51  | 0.884112823 | 1     | 0.989 | 2.67E-47    | TMSB10   | 6 | RBP7_VEC |
| 1449 | 1.57E-30  | 0.867781968 | 0.838 | 0.575 | 3.42E-26    | EMCN     | 6 | RBP7_VEC |
| 1450 | 1.56E-27  | 0.865310713 | 0.927 | 0.82  | 3.41E-23    | IFI27    | 6 | RBP7_VEC |
| 1451 | 5.77E-21  | 0.865078187 | 0.721 | 0.471 | 1.26E-16    | TSC22D1  | 6 | RBP7_VEC |
| 1452 | 4.84E-51  | 0.863877026 | 0.486 | 0.099 | 1.06E-46    | PREX1    | 6 | RBP7_VEC |
| 1453 | 5.87E-105 | 0.853877022 | 0.296 | 0.001 | 1.28E-100   | SEMA3G   | 6 | RBP7_VEC |
| 1454 | 4.89E-59  | 0.852349291 | 0.441 | 0.064 | 1.07E-54    | AIF1L    | 6 | RBP7_VEC |
| 1455 | 7.56E-31  | 0.849702303 | 0.603 | 0.258 | 1.65E-26    | DOCK9    | 6 | RBP7_VEC |
| 1456 | 6.71E-54  | 0.844520058 | 0.536 | 0.105 | 1.46E-49    | ANXA1    | 6 | RBP7_VEC |
| 1457 | 2.08E-21  | 0.836215063 | 0.447 | 0.18  | 4.54E-17    | KCTD12   | 6 | RBP7_VEC |
| 1458 | 2.05E-24  | 0.815473973 | 0.709 | 0.432 | 4.47E-20    | ATP1A1   | 6 | RBP7_VEC |
| 1459 | 3.41E-26  | 0.807367805 | 0.425 | 0.144 | 7.44E-22    | ARL15    | 6 | RBP7_VEC |
| 1460 | 2.96E-13  | 0.80001653  | 0.458 | 0.267 | 6.47E-09    | PPP1R14A | 6 | RBP7_VEC |
| 1461 | 1.77E-34  | 0.795561279 | 0.436 | 0.117 | 3.86E-30    | CDH13    | 6 | RBP7_VEC |
| 1462 | 3.67E-42  | 0.79349031  | 0.497 | 0.125 | 8.00E-38    | RAPGEF3  | 6 | RBP7_VEC |
| 1463 | 1.07E-23  | 0.78628774  | 0.676 | 0.361 | 2.33E-19    | LRRC32   | 6 | RBP7_VEC |
| 1464 | 3.66E-54  | 0.783972714 | 0.307 | 0.028 | 7.98E-50    | JAG2     | 6 | RBP7_VEC |
| 1465 | 1.40E-14  | 0.769339928 | 0.525 | 0.301 | 3.05E-10    | SOX18    | 6 | RBP7_VEC |
| 1466 | 1.83E-16  | 0.763127078 | 0.631 | 0.415 | 3.98E-12    | COL4A1   | 6 | RBP7_VEC |
| 1467 | 3.41E-31  | 0.762976556 | 0.687 | 0.331 | 7.43E-27    | LRRFIP1  | 6 | RBP7_VEC |
| 1468 | 4.30E-34  | 0.762119296 | 0.313 | 0.057 | 9.37E-30    | FUT8     | 6 | RBP7_VEC |

|      |          |             |       |       |             |          |   |          |
|------|----------|-------------|-------|-------|-------------|----------|---|----------|
| 1469 | 1.38E-28 | 0.761661319 | 0.916 | 0.753 | 3.02E-24    | A2M      | 6 | RBP7_VEC |
| 1470 | 8.51E-31 | 0.758410342 | 0.872 | 0.607 | 1.85E-26    | SPTBN1   | 6 | RBP7_VEC |
| 1471 | 3.65E-37 | 0.757785648 | 0.43  | 0.1   | 7.97E-33    | IGFBP2   | 6 | RBP7_VEC |
| 1472 | 1.11E-48 | 0.756168088 | 0.391 | 0.062 | 2.43E-44    | ITGA6    | 6 | RBP7_VEC |
| 1473 | 1.92E-24 | 0.751444968 | 0.48  | 0.19  | 4.19E-20    | HEG1     | 6 | RBP7_VEC |
| 1474 | 3.54E-38 | 0.742142877 | 0.933 | 0.756 | 7.72E-34    | ANXA2    | 6 | RBP7_VEC |
| 1475 | 2.33E-15 | 0.740186851 | 0.642 | 0.47  | 5.08E-11    | MRPL33   | 6 | RBP7_VEC |
| 1476 | 1.10E-21 | 0.738247587 | 0.832 | 0.618 | 2.40E-17    | TCF4     | 6 | RBP7_VEC |
| 1477 | 1.23E-18 | 0.73600591  | 0.827 | 0.674 | 2.68E-14    | RDX      | 6 | RBP7_VEC |
| 1478 | 1.15E-21 | 0.734601856 | 0.771 | 0.596 | 2.51E-17    | ESAM     | 6 | RBP7_VEC |
| 1479 | 3.50E-30 | 0.734393988 | 0.436 | 0.127 | 7.63E-26    | HLA-DMA  | 6 | RBP7_VEC |
| 1480 | 2.64E-26 | 0.726775027 | 0.57  | 0.26  | 5.76E-22    | SWAP70   | 6 | RBP7_VEC |
| 1481 | 6.76E-67 | 0.720597969 | 0.257 | 0.009 | 1.47E-62    | MMP2     | 6 | RBP7_VEC |
| 1482 | 7.89E-35 | 0.716332641 | 0.413 | 0.1   | 1.72E-30    | SYNPO    | 6 | RBP7_VEC |
| 1483 | 3.42E-25 | 0.713893096 | 0.391 | 0.121 | 7.46E-21    | THSD7A   | 6 | RBP7_VEC |
| 1484 | 8.38E-49 | 0.70888134  | 0.134 | 0     | 1.83E-44    | PI16     | 6 | RBP7_VEC |
| 1485 | 8.15E-13 | 0.705552226 | 0.927 | 0.806 | 1.78E-08    | SPARC    | 6 | RBP7_VEC |
| 1486 | 7.92E-35 | 0.704169441 | 0.313 | 0.055 | 1.73E-30    | NES      | 6 | RBP7_VEC |
| 1487 | 8.17E-10 | 0.697896547 | 0.553 | 0.398 | 1.78E-05    | TXNIP    | 6 | RBP7_VEC |
| 1488 | 3.12E-21 | 0.69652607  | 0.737 | 0.522 | 6.80E-17    | PTTG1IP  | 6 | RBP7_VEC |
| 1489 | 2.80E-10 | 0.692144228 | 0.486 | 0.314 | 6.10E-06    | APOLD1   | 6 | RBP7_VEC |
| 1490 | 7.46E-94 | 0.682632877 | 0.313 | 0.006 | 1.63E-89    | EBF1     | 6 | RBP7_VEC |
| 1491 | 9.00E-11 | 0.680974771 | 0.402 | 0.222 | 1.96E-06    | HEY1     | 6 | RBP7_VEC |
| 1492 | 4.61E-16 | 0.680551774 | 0.654 | 0.434 | 1.01E-11    | CD93     | 6 | RBP7_VEC |
| 1493 | 2.60E-18 | 0.678975724 | 0.603 | 0.347 | 5.67E-14    | SYNE2    | 6 | RBP7_VEC |
| 1494 | 1.02E-62 | 0.67547236  | 0.307 | 0.021 | 2.22E-58    | LCN6     | 6 | RBP7_VEC |
| 1495 | 1.64E-44 | 0.671869986 | 0.246 | 0.021 | 3.57E-40    | ANXA3    | 6 | RBP7_VEC |
| 1496 | 8.64E-42 | 0.667910098 | 0.363 | 0.06  | 1.88E-37    | ENTPD1   | 6 | RBP7_VEC |
| 1497 | 9.03E-21 | 0.666762187 | 0.877 | 0.733 | 1.97E-16    | HLA-DRB5 | 6 | RBP7_VEC |
| 1498 | 3.56E-10 | 0.665956149 | 0.553 | 0.403 | 7.75E-06    | HLA-DPA1 | 6 | RBP7_VEC |
| 1499 | 5.13E-29 | 0.663416864 | 0.363 | 0.095 | 1.12E-24    | C9orf3   | 6 | RBP7_VEC |
| 1500 | 5.65E-18 | 0.662301262 | 0.709 | 0.505 | 1.23E-13    | CLIC4    | 6 | RBP7_VEC |
| 1501 | 1.40E-44 | 0.661725334 | 0.168 | 0.006 | 3.05E-40    | NOV      | 6 | RBP7_VEC |
| 1502 | 1.38E-22 | 0.658273087 | 0.48  | 0.201 | 3.02E-18    | SSFA2    | 6 | RBP7_VEC |
| 1503 | 6.95E-26 | 0.658254995 | 0.246 | 0.043 | 1.52E-21    | MCTP1    | 6 | RBP7_VEC |
| 1504 | 2.56E-31 | 0.656402141 | 0.397 | 0.102 | 5.59E-27    | ARHGEF3  | 6 | RBP7_VEC |
| 1505 | 3.39E-12 | 0.655357225 | 0.469 | 0.285 | 7.38E-08    | UACA     | 6 | RBP7_VEC |
| 1506 | 8.16E-17 | 0.653803182 | 0.642 | 0.423 | 1.78E-12    | GNAI2    | 6 | RBP7_VEC |
| 1507 | 2.06E-22 | 0.649257992 | 0.358 | 0.108 | 4.48E-18    | ASRGL1   | 6 | RBP7_VEC |
| 1508 | 5.81E-09 | 0.648615399 | 0.654 | 0.531 | 0.00126656  | KLF2     | 6 | RBP7_VEC |
| 1509 | 7.50E-14 | 0.646865347 | 0.626 | 0.423 | 1.63E-09    | NEDD9    | 6 | RBP7_VEC |
| 1510 | 8.41E-71 | 0.638646689 | 0.257 | 0.008 | 1.83E-66    | MGLL     | 6 | RBP7_VEC |
| 1511 | 3.93E-49 | 0.636392783 | 0.358 | 0.047 | 8.56E-45    | TMTC1    | 6 | RBP7_VEC |
| 1512 | 4.55E-65 | 0.630396772 | 0.263 | 0.011 | 9.93E-61    | CX3CL1   | 6 | RBP7_VEC |
| 1513 | 4.24E-38 | 0.623405365 | 0.994 | 0.953 | 9.25E-34    | PTMA     | 6 | RBP7_VEC |
| 1514 | 3.02E-26 | 0.622030752 | 0.352 | 0.095 | 6.58E-22    | SOS1     | 6 | RBP7_VEC |
| 1515 | 9.11E-09 | 0.612405147 | 0.469 | 0.319 | 0.00198745  | HLA-DPB1 | 6 | RBP7_VEC |
| 1516 | 7.49E-23 | 0.607209277 | 0.369 | 0.118 | 1.63E-18    | TSPAN13  | 6 | RBP7_VEC |
| 1517 | 9.49E-21 | 0.604104501 | 0.832 | 0.647 | 2.07E-16    | TACC1    | 6 | RBP7_VEC |
| 1518 | 4.31E-26 | 0.598162362 | 0.274 | 0.056 | 9.39E-22    | C10orf54 | 6 | RBP7_VEC |
| 1519 | 1.33E-18 | 0.597650111 | 0.67  | 0.414 | 2.89E-14    | MYH9     | 6 | RBP7_VEC |
| 1520 | 6.83E-10 | 0.59728384  | 0.592 | 0.426 | 1.49E-05    | LGALS1   | 6 | RBP7_VEC |
| 1521 | 2.94E-08 | 0.596187918 | 0.346 | 0.18  | 0.000642105 | CD320    | 6 | RBP7_VEC |
| 1522 | 1.08E-22 | 0.593038019 | 0.374 | 0.112 | 2.36E-18    | GJA1     | 6 | RBP7_VEC |
| 1523 | 3.77E-16 | 0.583152003 | 0.687 | 0.449 | 8.22E-12    | AHNAK    | 6 | RBP7_VEC |
| 1524 | 2.85E-07 | 0.582925799 | 0.352 | 0.202 | 0.00622616  | CYR61    | 6 | RBP7_VEC |
| 1525 | 1.40E-12 | 0.58258582  | 0.536 | 0.329 | 3.06E-08    | JAM2     | 6 | RBP7_VEC |
| 1526 | 4.31E-14 | 0.578185881 | 0.966 | 0.882 | 9.39E-10    | HSPB1    | 6 | RBP7_VEC |
| 1527 | 1.02E-06 | 0.577587156 | 0.525 | 0.42  | 0.022256631 | EDNRB    | 6 | RBP7_VEC |
| 1528 | 4.80E-16 | 0.577120894 | 0.425 | 0.195 | 1.05E-11    | RPS6KA2  | 6 | RBP7_VEC |
| 1529 | 3.21E-16 | 0.575802269 | 0.832 | 0.681 | 6.99E-12    | DSTN     | 6 | RBP7_VEC |
| 1530 | 8.71E-20 | 0.575587064 | 0.531 | 0.26  | 1.90E-15    | NAA10    | 6 | RBP7_VEC |
| 1531 | 1.05E-15 | 0.573377748 | 0.486 | 0.24  | 2.29E-11    | ARID5B   | 6 | RBP7_VEC |
| 1532 | 3.75E-07 | 0.57217325  | 0.587 | 0.48  | 0.008171159 | CD81     | 6 | RBP7_VEC |
| 1533 | 1.46E-11 | 0.572019587 | 0.631 | 0.459 | 3.19E-07    | YWHAH    | 6 | RBP7_VEC |
| 1534 | 6.04E-32 | 0.562916222 | 0.212 | 0.025 | 1.32E-27    | SLC14A1  | 6 | RBP7_VEC |
| 1535 | 2.00E-28 | 0.558921971 | 0.251 | 0.042 | 4.37E-24    | ADAMTS6  | 6 | RBP7_VEC |
| 1536 | 8.11E-16 | 0.558556184 | 0.385 | 0.164 | 1.77E-11    | ACVRL1   | 6 | RBP7_VEC |
| 1537 | 5.06E-16 | 0.558298644 | 0.559 | 0.311 | 1.10E-11    | EMP2     | 6 | RBP7_VEC |
| 1538 | 9.86E-17 | 0.555566057 | 0.43  | 0.192 | 2.15E-12    | PTPRM    | 6 | RBP7_VEC |

|      |          |             |       |       |             |           |   |          |
|------|----------|-------------|-------|-------|-------------|-----------|---|----------|
| 1539 | 2.73E-74 | 0.554899072 | 0.218 | 0.001 | 5.95E-70    | CD200     | 6 | RBP7_VEC |
| 1540 | 3.11E-08 | 0.554080308 | 0.101 | 0.024 | 0.00067911  | POSTN     | 6 | RBP7_VEC |
| 1541 | 6.49E-13 | 0.552396787 | 0.447 | 0.241 | 1.42E-08    | MECOM     | 6 | RBP7_VEC |
| 1542 | 8.94E-14 | 0.551937225 | 0.564 | 0.353 | 1.95E-09    | AES       | 6 | RBP7_VEC |
| 1543 | 1.18E-10 | 0.549077747 | 0.464 | 0.257 | 2.58E-06    | IL32      | 6 | RBP7_VEC |
| 1544 | 1.76E-47 | 0.545840134 | 0.33  | 0.042 | 3.83E-43    | GPRC5B    | 6 | RBP7_VEC |
| 1545 | 3.69E-09 | 0.542126363 | 0.687 | 0.514 | 8.06E-05    | THBD      | 6 | RBP7_VEC |
| 1546 | 1.67E-24 | 0.537306666 | 0.994 | 0.988 | 3.64E-20    | TMSB4X    | 6 | RBP7_VEC |
| 1547 | 9.39E-63 | 0.531969893 | 0.173 | 0     | 2.05E-58    | COL15A1   | 6 | RBP7_VEC |
| 1548 | 8.58E-15 | 0.531228052 | 0.475 | 0.248 | 1.87E-10    | LMO2      | 6 | RBP7_VEC |
| 1549 | 4.97E-12 | 0.530524883 | 0.654 | 0.492 | 1.08E-07    | NFIB      | 6 | RBP7_VEC |
| 1550 | 7.57E-15 | 0.52974412  | 0.659 | 0.449 | 1.65E-10    | CTNNB1    | 6 | RBP7_VEC |
| 1551 | 9.47E-09 | 0.529090367 | 0.849 | 0.76  | 0.000206542 | RHOB      | 6 | RBP7_VEC |
| 1552 | 9.25E-17 | 0.528842194 | 0.922 | 0.788 | 2.02E-12    | CALCRL    | 6 | RBP7_VEC |
| 1553 | 1.50E-44 | 0.528682132 | 0.14  | 0.002 | 3.27E-40    | CLIC3     | 6 | RBP7_VEC |
| 1554 | 3.61E-10 | 0.527446048 | 0.43  | 0.255 | 7.87E-06    | MEF2A     | 6 | RBP7_VEC |
| 1555 | 2.69E-07 | 0.52626414  | 0.307 | 0.172 | 0.005865645 | GPIHBP1   | 6 | RBP7_VEC |
| 1556 | 4.83E-13 | 0.521893695 | 0.832 | 0.737 | 1.05E-08    | SNHG7     | 6 | RBP7_VEC |
| 1557 | 2.85E-09 | 0.520858662 | 0.291 | 0.136 | 6.22E-05    | AZIN1     | 6 | RBP7_VEC |
| 1558 | 1.28E-10 | 0.520366082 | 0.358 | 0.171 | 2.80E-06    | MALL      | 6 | RBP7_VEC |
| 1559 | 6.84E-15 | 0.515927381 | 0.821 | 0.698 | 1.49E-10    | S100A11   | 6 | RBP7_VEC |
| 1560 | 3.38E-15 | 0.515719894 | 0.944 | 0.812 | 7.38E-11    | HSPG2     | 6 | RBP7_VEC |
| 1561 | 1.17E-27 | 0.515023877 | 0.313 | 0.067 | 2.55E-23    | MMP28     | 6 | RBP7_VEC |
| 1562 | 1.60E-14 | 0.514726176 | 0.693 | 0.471 | 3.50E-10    | NAA38     | 6 | RBP7_VEC |
| 1563 | 6.16E-19 | 0.512049761 | 0.413 | 0.164 | 1.34E-14    | EFCAB14   | 6 | RBP7_VEC |
| 1564 | 2.26E-29 | 0.510754661 | 0.229 | 0.033 | 4.94E-25    | PDGFB     | 6 | RBP7_VEC |
| 1565 | 1.13E-06 | 0.509232328 | 0.67  | 0.532 | 0.024612953 | ADAMTS1   | 6 | RBP7_VEC |
| 1566 | 2.12E-12 | 0.504640055 | 0.782 | 0.681 | 4.62E-08    | PTRF      | 6 | RBP7_VEC |
| 1567 | 4.76E-15 | 0.496968378 | 0.559 | 0.304 | 1.04E-10    | NDRG1     | 6 | RBP7_VEC |
| 1568 | 1.40E-08 | 0.496446574 | 0.955 | 0.912 | 0.000304646 | TM4SF1    | 6 | RBP7_VEC |
| 1569 | 2.62E-20 | 0.496000013 | 0.352 | 0.115 | 5.72E-16    | TPM1      | 6 | RBP7_VEC |
| 1570 | 2.35E-07 | 0.495031467 | 0.458 | 0.321 | 0.005123574 | TMEM88    | 6 | RBP7_VEC |
| 1571 | 1.08E-11 | 0.492181373 | 0.659 | 0.484 | 2.36E-07    | NDUFA12   | 6 | RBP7_VEC |
| 1572 | 5.49E-13 | 0.489648451 | 0.212 | 0.064 | 1.20E-08    | CTSC      | 6 | RBP7_VEC |
| 1573 | 4.57E-09 | 0.4893478   | 0.749 | 0.693 | 9.98E-05    | HYAL2     | 6 | RBP7_VEC |
| 1574 | 4.43E-13 | 0.487302094 | 0.922 | 0.808 | 9.66E-09    | IFITM1    | 6 | RBP7_VEC |
| 1575 | 3.11E-07 | 0.484690225 | 0.369 | 0.226 | 0.006784959 | HEXIM1    | 6 | RBP7_VEC |
| 1576 | 2.32E-15 | 0.48304452  | 0.771 | 0.468 | 5.06E-11    | EMP1      | 6 | RBP7_VEC |
| 1577 | 1.86E-13 | 0.481638181 | 0.497 | 0.276 | 4.05E-09    | COX17     | 6 | RBP7_VEC |
| 1578 | 4.53E-12 | 0.48092185  | 0.67  | 0.505 | 9.89E-08    | CYB5R3    | 6 | RBP7_VEC |
| 1579 | 2.76E-13 | 0.478890703 | 0.48  | 0.266 | 6.03E-09    | MAP4      | 6 | RBP7_VEC |
| 1580 | 2.64E-12 | 0.477329891 | 0.642 | 0.494 | 5.76E-08    | ARPC1B    | 6 | RBP7_VEC |
| 1581 | 3.34E-20 | 0.475583099 | 0.972 | 0.946 | 7.28E-16    | IFITM2    | 6 | RBP7_VEC |
| 1582 | 1.50E-11 | 0.475499008 | 0.413 | 0.218 | 3.27E-07    | WNK1      | 6 | RBP7_VEC |
| 1583 | 1.35E-11 | 0.475092474 | 0.944 | 0.85  | 2.95E-07    | ID1       | 6 | RBP7_VEC |
| 1584 | 2.95E-10 | 0.474850506 | 0.363 | 0.195 | 6.43E-06    | CD58      | 6 | RBP7_VEC |
| 1585 | 4.96E-11 | 0.474469411 | 0.559 | 0.374 | 1.08E-06    | ACTN4     | 6 | RBP7_VEC |
| 1586 | 1.13E-11 | 0.472642802 | 0.453 | 0.251 | 2.46E-07    | GABARAPL1 | 6 | RBP7_VEC |
| 1587 | 4.52E-14 | 0.468699698 | 0.721 | 0.505 | 9.86E-10    | LMNA      | 6 | RBP7_VEC |
| 1588 | 2.61E-19 | 0.46689374  | 0.268 | 0.071 | 5.69E-15    | TES       | 6 | RBP7_VEC |
| 1589 | 3.06E-24 | 0.466790947 | 0.285 | 0.064 | 6.67E-20    | NQO1      | 6 | RBP7_VEC |
| 1590 | 1.01E-11 | 0.463599025 | 0.531 | 0.32  | 2.20E-07    | ADCY4     | 6 | RBP7_VEC |
| 1591 | 2.66E-24 | 0.46163776  | 0.229 | 0.042 | 5.81E-20    | SLC12A2   | 6 | RBP7_VEC |
| 1592 | 7.21E-10 | 0.460881259 | 0.922 | 0.862 | 1.57E-05    | HLA-DRB1  | 6 | RBP7_VEC |
| 1593 | 1.72E-12 | 0.459312401 | 0.927 | 0.767 | 3.75E-08    | GADD45B   | 6 | RBP7_VEC |
| 1594 | 3.17E-40 | 0.45908516  | 0.173 | 0.009 | 6.92E-36    | PLLP      | 6 | RBP7_VEC |
| 1595 | 2.14E-22 | 0.45747358  | 0.961 | 0.87  | 4.66E-18    | H3F3A     | 6 | RBP7_VEC |
| 1596 | 1.83E-52 | 0.457218562 | 0.168 | 0.003 | 3.98E-48    | SCNN1B    | 6 | RBP7_VEC |
| 1597 | 4.11E-09 | 0.456697898 | 0.469 | 0.307 | 8.97E-05    | HLA-DQB1  | 6 | RBP7_VEC |
| 1598 | 9.50E-10 | 0.456293757 | 0.587 | 0.424 | 2.07E-05    | NUCKS1    | 6 | RBP7_VEC |
| 1599 | 2.15E-15 | 0.455932377 | 0.966 | 0.798 | 4.69E-11    | IER2      | 6 | RBP7_VEC |
| 1600 | 8.09E-37 | 0.45553526  | 0.235 | 0.025 | 1.76E-32    | TM6SF1    | 6 | RBP7_VEC |
| 1601 | 2.39E-52 | 0.453011249 | 0.207 | 0.008 | 5.20E-48    | FAM13C    | 6 | RBP7_VEC |
| 1602 | 1.87E-13 | 0.452892049 | 0.804 | 0.68  | 4.07E-09    | GUK1      | 6 | RBP7_VEC |
| 1603 | 2.39E-10 | 0.452459992 | 0.883 | 0.804 | 5.22E-06    | CD9       | 6 | RBP7_VEC |
| 1604 | 1.12E-10 | 0.449867085 | 0.587 | 0.417 | 2.45E-06    | LAP3      | 6 | RBP7_VEC |
| 1605 | 5.44E-14 | 0.4498175   | 0.235 | 0.073 | 1.19E-09    | CXorf36   | 6 | RBP7_VEC |
| 1606 | 6.80E-37 | 0.447735257 | 0.212 | 0.02  | 1.48E-32    | KCNN3     | 6 | RBP7_VEC |
| 1607 | 8.08E-20 | 0.445383028 | 0.983 | 0.91  | 1.76E-15    | H3F3B     | 6 | RBP7_VEC |
| 1608 | 1.60E-10 | 0.444943218 | 0.665 | 0.466 | 3.49E-06    | GIMAP7    | 6 | RBP7_VEC |

|      |          |             |       |       |             |           |   |          |
|------|----------|-------------|-------|-------|-------------|-----------|---|----------|
| 1609 | 1.56E-11 | 0.44325056  | 0.391 | 0.196 | 3.40E-07    | RUNX1T1   | 6 | RBP7_VEC |
| 1610 | 1.75E-08 | 0.443054551 | 0.486 | 0.34  | 0.000380985 | ADD1      | 6 | RBP7_VEC |
| 1611 | 1.66E-10 | 0.440164846 | 0.665 | 0.502 | 3.61E-06    | CYYR1     | 6 | RBP7_VEC |
| 1612 | 4.37E-13 | 0.43995146  | 0.235 | 0.076 | 9.52E-09    | RAPGEF1   | 6 | RBP7_VEC |
| 1613 | 3.70E-11 | 0.438630753 | 0.469 | 0.268 | 8.06E-07    | SKIL      | 6 | RBP7_VEC |
| 1614 | 4.89E-09 | 0.438358754 | 0.425 | 0.26  | 0.000106683 | CAPN2     | 6 | RBP7_VEC |
| 1615 | 1.13E-36 | 0.435647277 | 0.106 | 0.001 | 2.47E-32    | FBLN5     | 6 | RBP7_VEC |
| 1616 | 2.14E-12 | 0.435496983 | 0.475 | 0.246 | 4.67E-08    | PLEC      | 6 | RBP7_VEC |
| 1617 | 7.14E-08 | 0.433027375 | 0.363 | 0.222 | 0.001557034 | ZBTB38    | 6 | RBP7_VEC |
| 1618 | 3.71E-09 | 0.432031977 | 0.855 | 0.712 | 8.09E-05    | ZFP36L1   | 6 | RBP7_VEC |
| 1619 | 3.81E-11 | 0.43179852  | 0.425 | 0.241 | 8.31E-07    | FKBP9     | 6 | RBP7_VEC |
| 1620 | 9.53E-25 | 0.430790444 | 0.983 | 0.982 | 2.08E-20    | IFITM3    | 6 | RBP7_VEC |
| 1621 | 9.66E-10 | 0.427840483 | 0.43  | 0.255 | 2.11E-05    | GNAQ      | 6 | RBP7_VEC |
| 1622 | 8.64E-38 | 0.426929638 | 0.179 | 0.011 | 1.88E-33    | VEGFC     | 6 | RBP7_VEC |
| 1623 | 1.22E-11 | 0.422735308 | 0.296 | 0.126 | 2.65E-07    | CTSH      | 6 | RBP7_VEC |
| 1624 | 5.07E-10 | 0.421819488 | 0.263 | 0.11  | 1.11E-05    | HS3ST1    | 6 | RBP7_VEC |
| 1625 | 4.44E-14 | 0.420867441 | 0.246 | 0.078 | 9.69E-10    | HSPA12B   | 6 | RBP7_VEC |
| 1626 | 1.16E-08 | 0.41632416  | 0.587 | 0.44  | 0.000253343 | ARL6IP5   | 6 | RBP7_VEC |
| 1627 | 1.77E-09 | 0.415809962 | 0.866 | 0.807 | 3.85E-05    | RHOC      | 6 | RBP7_VEC |
| 1628 | 4.57E-09 | 0.412876817 | 0.816 | 0.656 | 9.97E-05    | CLEC14A   | 6 | RBP7_VEC |
| 1629 | 5.89E-17 | 0.411649069 | 0.95  | 0.838 | 1.28E-12    | RHOA      | 6 | RBP7_VEC |
| 1630 | 9.21E-31 | 0.410552254 | 0.179 | 0.017 | 2.01E-26    | VWA1      | 6 | RBP7_VEC |
| 1631 | 1.15E-08 | 0.409107852 | 0.14  | 0.042 | 0.000250429 | HLA-DQA1  | 6 | RBP7_VEC |
| 1632 | 5.31E-26 | 0.408618592 | 0.168 | 0.019 | 1.16E-21    | PDGFD     | 6 | RBP7_VEC |
| 1633 | 1.63E-13 | 0.407823215 | 0.955 | 0.933 | 3.55E-09    | S100A10   | 6 | RBP7_VEC |
| 1634 | 1.32E-14 | 0.407103063 | 0.268 | 0.09  | 2.88E-10    | CD109     | 6 | RBP7_VEC |
| 1635 | 8.26E-09 | 0.404407442 | 0.313 | 0.161 | 0.00018023  | SMARCA2   | 6 | RBP7_VEC |
| 1636 | 1.11E-12 | 0.403674287 | 0.302 | 0.118 | 2.42E-08    | SH3BGRL2  | 6 | RBP7_VEC |
| 1637 | 3.42E-07 | 0.402939871 | 0.514 | 0.398 | 0.007447817 | SP100     | 6 | RBP7_VEC |
| 1638 | 1.09E-07 | 0.402179152 | 0.458 | 0.309 | 0.002374535 | MAST4     | 6 | RBP7_VEC |
| 1639 | 4.21E-08 | 0.401767203 | 0.223 | 0.097 | 0.000918999 | XPR1      | 6 | RBP7_VEC |
| 1640 | 1.36E-07 | 0.401395486 | 0.693 | 0.555 | 0.002961123 | ZFP36L2   | 6 | RBP7_VEC |
| 1641 | 5.20E-13 | 0.401239202 | 0.302 | 0.117 | 1.13E-08    | GALNT15   | 6 | RBP7_VEC |
| 1642 | 5.45E-09 | 0.400318101 | 0.771 | 0.638 | 0.000118749 | S1PR1     | 6 | RBP7_VEC |
| 1643 | 3.51E-07 | 0.399680896 | 0.626 | 0.503 | 0.007643998 | MMRN2     | 6 | RBP7_VEC |
| 1644 | 1.53E-08 | 0.397994959 | 0.899 | 0.803 | 0.000334454 | CLEC3B    | 6 | RBP7_VEC |
| 1645 | 4.56E-09 | 0.397578159 | 0.866 | 0.836 | 9.95E-05    | CD59      | 6 | RBP7_VEC |
| 1646 | 3.95E-09 | 0.39353795  | 0.385 | 0.212 | 8.60E-05    | GATA2     | 6 | RBP7_VEC |
| 1647 | 6.97E-11 | 0.3931332   | 0.626 | 0.422 | 1.52E-06    | IL3RA     | 6 | RBP7_VEC |
| 1648 | 4.04E-09 | 0.39190242  | 0.335 | 0.173 | 8.80E-05    | FES       | 6 | RBP7_VEC |
| 1649 | 6.27E-10 | 0.391728717 | 0.307 | 0.145 | 1.37E-05    | RFTN1     | 6 | RBP7_VEC |
| 1650 | 1.84E-08 | 0.391573873 | 0.777 | 0.649 | 0.000401815 | LDHA      | 6 | RBP7_VEC |
| 1651 | 4.71E-07 | 0.391031128 | 0.302 | 0.166 | 0.010278848 | NUDT4     | 6 | RBP7_VEC |
| 1652 | 2.95E-10 | 0.389069931 | 0.872 | 0.773 | 6.43E-06    | HNRNPA2B1 | 6 | RBP7_VEC |
| 1653 | 1.49E-15 | 0.388934625 | 0.939 | 0.772 | 3.25E-11    | RNASE1    | 6 | RBP7_VEC |
| 1654 | 2.07E-07 | 0.385380198 | 0.654 | 0.527 | 0.004521003 | ETS1      | 6 | RBP7_VEC |
| 1655 | 2.86E-07 | 0.383438682 | 0.408 | 0.258 | 0.006234657 | BCL2L1    | 6 | RBP7_VEC |
| 1656 | 6.39E-32 | 0.381729502 | 0.173 | 0.014 | 1.39E-27    | APOL4     | 6 | RBP7_VEC |
| 1657 | 1.00E-07 | 0.380766169 | 0.419 | 0.259 | 0.002180924 | TMEM173   | 6 | RBP7_VEC |
| 1658 | 2.22E-10 | 0.380624729 | 0.24  | 0.092 | 4.84E-06    | MYL9      | 6 | RBP7_VEC |
| 1659 | 3.68E-11 | 0.380403021 | 0.251 | 0.095 | 8.02E-07    | SUN2      | 6 | RBP7_VEC |
| 1660 | 4.60E-08 | 0.379968041 | 0.592 | 0.464 | 0.001002681 | MSN       | 6 | RBP7_VEC |
| 1661 | 1.11E-26 | 0.379189537 | 0.123 | 0.008 | 2.42E-22    | IMPG2     | 6 | RBP7_VEC |
| 1662 | 1.75E-29 | 0.378455225 | 0.173 | 0.016 | 3.81E-25    | ITGB4     | 6 | RBP7_VEC |
| 1663 | 1.28E-17 | 0.37774626  | 0.151 | 0.024 | 2.79E-13    | CFH       | 6 | RBP7_VEC |
| 1664 | 2.77E-23 | 0.374868312 | 0.983 | 0.951 | 6.05E-19    | HLA-C     | 6 | RBP7_VEC |
| 1665 | 2.66E-10 | 0.371392032 | 0.313 | 0.144 | 5.79E-06    | PPIC      | 6 | RBP7_VEC |
| 1666 | 1.05E-11 | 0.37137878  | 0.229 | 0.08  | 2.30E-07    | NAV1      | 6 | RBP7_VEC |
| 1667 | 4.47E-08 | 0.371334057 | 0.196 | 0.079 | 0.000974749 | TNFRSF4   | 6 | RBP7_VEC |
| 1668 | 3.16E-25 | 0.371312695 | 1     | 0.979 | 6.88E-21    | HLA-B     | 6 | RBP7_VEC |
| 1669 | 6.27E-33 | 0.366044041 | 0.14  | 0.007 | 1.37E-28    | UNC5B     | 6 | RBP7_VEC |
| 1670 | 1.36E-08 | 0.364895652 | 0.341 | 0.183 | 0.00029721  | SP110     | 6 | RBP7_VEC |
| 1671 | 7.14E-10 | 0.362744617 | 0.955 | 0.897 | 1.56E-05    | UBC       | 6 | RBP7_VEC |
| 1672 | 1.37E-08 | 0.361910674 | 0.296 | 0.146 | 0.000297775 | HIP1      | 6 | RBP7_VEC |
| 1673 | 3.68E-07 | 0.360212637 | 0.503 | 0.358 | 0.008024975 | FOXP1     | 6 | RBP7_VEC |
| 1674 | 9.34E-19 | 0.360201783 | 0.212 | 0.045 | 2.04E-14    | FILIP1L   | 6 | RBP7_VEC |
| 1675 | 5.86E-16 | 0.358773913 | 0.128 | 0.02  | 1.28E-11    | CLDN15    | 6 | RBP7_VEC |
| 1676 | 5.61E-14 | 0.358515375 | 0.246 | 0.078 | 1.22E-09    | C8orf33   | 6 | RBP7_VEC |
| 1677 | 3.82E-09 | 0.357627626 | 0.274 | 0.124 | 8.33E-05    | SULF2     | 6 | RBP7_VEC |
| 1678 | 1.06E-11 | 0.357322026 | 0.916 | 0.839 | 2.32E-07    | FKBP1A    | 6 | RBP7_VEC |

|      |          |             |       |       |             |              |   |          |
|------|----------|-------------|-------|-------|-------------|--------------|---|----------|
| 1679 | 3.92E-09 | 0.357278657 | 0.274 | 0.124 | 8.54E-05    | ARHGEF15     | 6 | RBP7_VEC |
| 1680 | 7.04E-10 | 0.355974281 | 0.212 | 0.078 | 1.54E-05    | FAM110D      | 6 | RBP7_VEC |
| 1681 | 1.08E-06 | 0.351486883 | 0.43  | 0.286 | 0.023610511 | PKIG         | 6 | RBP7_VEC |
| 1682 | 5.73E-12 | 0.351028956 | 0.251 | 0.092 | 1.25E-07    | CCNY         | 6 | RBP7_VEC |
| 1683 | 2.07E-10 | 0.35086245  | 0.268 | 0.11  | 4.51E-06    | MCC          | 6 | RBP7_VEC |
| 1684 | 1.38E-07 | 0.346882841 | 0.358 | 0.206 | 0.003009718 | CASKIN2      | 6 | RBP7_VEC |
| 1685 | 1.23E-06 | 0.346736947 | 0.547 | 0.423 | 0.026746216 | WASF2        | 6 | RBP7_VEC |
| 1686 | 2.15E-08 | 0.344721256 | 0.682 | 0.549 | 0.000468869 | TMEM50A      | 6 | RBP7_VEC |
| 1687 | 1.97E-09 | 0.343960422 | 0.693 | 0.531 | 4.29E-05    | CALM2        | 6 | RBP7_VEC |
| 1688 | 1.47E-06 | 0.343425676 | 0.654 | 0.529 | 0.031952103 | LIMS2        | 6 | RBP7_VEC |
| 1689 | 1.53E-07 | 0.342991324 | 0.475 | 0.325 | 0.003335937 | POLR2K       | 6 | RBP7_VEC |
| 1690 | 7.63E-18 | 0.342107537 | 0.184 | 0.036 | 1.66E-13    | LPCAT2       | 6 | RBP7_VEC |
| 1691 | 5.17E-12 | 0.340948228 | 0.922 | 0.821 | 1.13E-07    | DDX5         | 6 | RBP7_VEC |
| 1692 | 4.94E-10 | 0.34084873  | 0.838 | 0.671 | 1.08E-05    | BTG1         | 6 | RBP7_VEC |
| 1693 | 2.66E-18 | 0.33961802  | 0.145 | 0.021 | 5.80E-14    | HLA-DMB      | 6 | RBP7_VEC |
| 1694 | 7.01E-08 | 0.339572563 | 0.525 | 0.393 | 0.001529073 | RAP1A        | 6 | RBP7_VEC |
| 1695 | 2.31E-12 | 0.339017338 | 0.218 | 0.069 | 5.04E-08    | IQCK         | 6 | RBP7_VEC |
| 1696 | 6.04E-07 | 0.338484008 | 0.196 | 0.085 | 0.013180355 | MCF2L        | 6 | RBP7_VEC |
| 1697 | 1.18E-08 | 0.335063551 | 0.212 | 0.085 | 0.000256764 | MAP1B        | 6 | RBP7_VEC |
| 1698 | 2.05E-06 | 0.334748344 | 0.408 | 0.277 | 0.044787526 | PKM          | 6 | RBP7_VEC |
| 1699 | 1.04E-06 | 0.333788477 | 0.626 | 0.502 | 0.022771591 | MTDH         | 6 | RBP7_VEC |
| 1700 | 2.92E-10 | 0.331470497 | 0.251 | 0.1   | 6.37E-06    | CRYBG3       | 6 | RBP7_VEC |
| 1701 | 3.84E-07 | 0.33028607  | 0.335 | 0.19  | 0.008367879 | SLFN5        | 6 | RBP7_VEC |
| 1702 | 3.45E-09 | 0.32982517  | 0.24  | 0.098 | 7.51E-05    | EPHA4        | 6 | RBP7_VEC |
| 1703 | 7.99E-11 | 0.32861845  | 0.916 | 0.84  | 1.74E-06    | RAC1         | 6 | RBP7_VEC |
| 1704 | 1.07E-08 | 0.328238092 | 0.235 | 0.098 | 0.000232978 | FGR          | 6 | RBP7_VEC |
| 1705 | 5.15E-07 | 0.327936605 | 0.268 | 0.137 | 0.011240052 | ABL2         | 6 | RBP7_VEC |
| 1706 | 4.09E-10 | 0.325890288 | 0.212 | 0.078 | 8.91E-06    | NHSL2        | 6 | RBP7_VEC |
| 1707 | 3.50E-07 | 0.325812323 | 0.268 | 0.137 | 0.00762423  | APOL3        | 6 | RBP7_VEC |
| 1708 | 2.78E-11 | 0.325498213 | 0.927 | 0.829 | 6.07E-07    | HMGB1        | 6 | RBP7_VEC |
| 1709 | 2.99E-08 | 0.324191931 | 0.654 | 0.508 | 0.0006518   | MAP1LC3B     | 6 | RBP7_VEC |
| 1710 | 1.31E-06 | 0.322898714 | 0.475 | 0.335 | 0.028628475 | ZEB1         | 6 | RBP7_VEC |
| 1711 | 3.71E-08 | 0.322761634 | 0.201 | 0.08  | 0.00080943  | RNF144B      | 6 | RBP7_VEC |
| 1712 | 6.09E-08 | 0.320431114 | 0.475 | 0.304 | 0.001328364 | CTTNBP2NL    | 6 | RBP7_VEC |
| 1713 | 1.39E-06 | 0.320267381 | 0.676 | 0.534 | 0.030305496 | GIMAP1       | 6 | RBP7_VEC |
| 1714 | 2.05E-10 | 0.319294151 | 0.257 | 0.104 | 4.47E-06    | KIAA1462     | 6 | RBP7_VEC |
| 1715 | 6.79E-17 | 0.317825471 | 0.156 | 0.028 | 1.48E-12    | RASGRF2      | 6 | RBP7_VEC |
| 1716 | 9.71E-11 | 0.317334356 | 0.106 | 0.021 | 2.12E-06    | TPD52L1      | 6 | RBP7_VEC |
| 1717 | 5.67E-07 | 0.316159238 | 0.291 | 0.156 | 0.0123722   | CYFIP1       | 6 | RBP7_VEC |
| 1718 | 2.07E-08 | 0.314693985 | 0.196 | 0.074 | 0.000451563 | CSRP2        | 6 | RBP7_VEC |
| 1719 | 1.27E-06 | 0.312162096 | 0.978 | 0.854 | 0.027709486 | FOS          | 6 | RBP7_VEC |
| 1720 | 2.69E-08 | 0.312005492 | 0.201 | 0.081 | 0.000585961 | HIP1R        | 6 | RBP7_VEC |
| 1721 | 4.95E-07 | 0.311132385 | 0.698 | 0.593 | 0.010796809 | EID1         | 6 | RBP7_VEC |
| 1722 | 1.68E-07 | 0.310662859 | 0.296 | 0.158 | 0.003654494 | MVP          | 6 | RBP7_VEC |
| 1723 | 1.02E-25 | 0.310155969 | 0.106 | 0.005 | 2.23E-21    | TMEM178A     | 6 | RBP7_VEC |
| 1724 | 4.83E-07 | 0.308928336 | 0.257 | 0.127 | 0.010526937 | TBC1D8       | 6 | RBP7_VEC |
| 1725 | 1.29E-09 | 0.308169544 | 0.296 | 0.134 | 2.81E-05    | SHROOM4      | 6 | RBP7_VEC |
| 1726 | 7.40E-12 | 0.3078576   | 0.173 | 0.047 | 1.61E-07    | CCDC88C      | 6 | RBP7_VEC |
| 1727 | 1.98E-07 | 0.307433988 | 0.117 | 0.034 | 0.00430955  | PTGDS        | 6 | RBP7_VEC |
| 1728 | 3.02E-07 | 0.307181943 | 0.944 | 0.827 | 0.006586413 | ZFP36        | 6 | RBP7_VEC |
| 1729 | 9.91E-10 | 0.305883765 | 0.14  | 0.037 | 2.16E-05    | TNXB         | 6 | RBP7_VEC |
| 1730 | 1.66E-11 | 0.305454325 | 0.922 | 0.837 | 3.61E-07    | CFL1         | 6 | RBP7_VEC |
| 1731 | 4.08E-07 | 0.304985303 | 0.335 | 0.191 | 0.008888606 | BCL6B        | 6 | RBP7_VEC |
| 1732 | 4.29E-07 | 0.304759489 | 0.285 | 0.149 | 0.00936558  | FURIN        | 6 | RBP7_VEC |
| 1733 | 2.13E-06 | 0.304464025 | 0.402 | 0.264 | 0.046467267 | LUZP1        | 6 | RBP7_VEC |
| 1734 | 1.16E-07 | 0.3004333   | 0.246 | 0.115 | 0.002538918 | TMEM184B     | 6 | RBP7_VEC |
| 1735 | 2.52E-16 | 0.300299166 | 0.179 | 0.038 | 5.49E-12    | C1orf115     | 6 | RBP7_VEC |
| 1736 | 9.55E-08 | 0.296446013 | 0.922 | 0.868 | 0.002081646 | MYL12B       | 6 | RBP7_VEC |
| 1737 | 1.90E-06 | 0.296123719 | 0.251 | 0.13  | 0.041472699 | RABGAP1      | 6 | RBP7_VEC |
| 1738 | 8.40E-07 | 0.295677093 | 0.709 | 0.595 | 0.018318127 | EIF4G2       | 6 | RBP7_VEC |
| 1739 | 8.40E-07 | 0.294911501 | 0.765 | 0.662 | 0.018309098 | ARPC2        | 6 | RBP7_VEC |
| 1740 | 1.07E-06 | 0.294501664 | 0.307 | 0.175 | 0.02343041  | LRCH1        | 6 | RBP7_VEC |
| 1741 | 8.53E-07 | 0.293493612 | 0.631 | 0.507 | 0.018594641 | ZNHIT1       | 6 | RBP7_VEC |
| 1742 | 6.06E-24 | 0.292468106 | 0.123 | 0.009 | 1.32E-19    | CMKLR1       | 6 | RBP7_VEC |
| 1743 | 7.07E-08 | 0.292447379 | 0.302 | 0.158 | 0.001541424 | FDFT1        | 6 | RBP7_VEC |
| 1744 | 1.62E-38 | 0.291706884 | 0.117 | 0.001 | 3.53E-34    | RP11-175K6.1 | 6 | RBP7_VEC |
| 1745 | 3.89E-10 | 0.290103526 | 0.156 | 0.045 | 8.49E-06    | WDR86        | 6 | RBP7_VEC |
| 1746 | 1.48E-46 | 0.289506611 | 0.151 | 0.003 | 3.22E-42    | AQP7         | 6 | RBP7_VEC |
| 1747 | 1.31E-22 | 0.287153442 | 0.173 | 0.024 | 2.86E-18    | MSRB3        | 6 | RBP7_VEC |
| 1748 | 3.56E-08 | 0.286504163 | 0.19  | 0.072 | 0.000776251 | NEURL1B      | 6 | RBP7_VEC |

|      |          |              |       |       |             |           |   |          |
|------|----------|--------------|-------|-------|-------------|-----------|---|----------|
| 1749 | 1.88E-06 | 0.286060599  | 0.223 | 0.107 | 0.040905919 | ABLIM1    | 6 | RBP7_VEC |
| 1750 | 9.38E-07 | 0.285702478  | 0.229 | 0.112 | 0.02046619  | ATP8B1    | 6 | RBP7_VEC |
| 1751 | 7.50E-21 | 0.284758071  | 0.117 | 0.011 | 1.64E-16    | SYNE3     | 6 | RBP7_VEC |
| 1752 | 2.06E-06 | 0.284307452  | 0.754 | 0.66  | 0.044828591 | TPM3      | 6 | RBP7_VEC |
| 1753 | 2.96E-09 | 0.281913468  | 0.844 | 0.737 | 6.46E-05    | SKP1      | 6 | RBP7_VEC |
| 1754 | 1.21E-07 | 0.28154734   | 0.257 | 0.121 | 0.002646211 | DHRS3     | 6 | RBP7_VEC |
| 1755 | 6.51E-08 | 0.280534804  | 0.235 | 0.103 | 0.001420386 | FZD6      | 6 | RBP7_VEC |
| 1756 | 1.93E-08 | 0.280040497  | 0.207 | 0.083 | 0.00041999  | PCNX      | 6 | RBP7_VEC |
| 1757 | 2.24E-06 | 0.278358273  | 0.223 | 0.109 | 0.048955011 | STK10     | 6 | RBP7_VEC |
| 1758 | 4.91E-10 | 0.277481598  | 0.162 | 0.049 | 1.07E-05    | SOX13     | 6 | RBP7_VEC |
| 1759 | 3.13E-08 | 0.27620615   | 0.279 | 0.13  | 0.000681884 | LAMA5     | 6 | RBP7_VEC |
| 1760 | 2.33E-09 | 0.275663264  | 0.603 | 0.36  | 5.07E-05    | ADIRF     | 6 | RBP7_VEC |
| 1761 | 1.46E-08 | 0.274769018  | 0.179 | 0.064 | 0.000317758 | KIAA1671  | 6 | RBP7_VEC |
| 1762 | 2.19E-12 | 0.27388214   | 0.101 | 0.016 | 4.78E-08    | SIPA1L2   | 6 | RBP7_VEC |
| 1763 | 5.96E-11 | 0.273183144  | 0.184 | 0.055 | 1.30E-06    | GATA2-AS1 | 6 | RBP7_VEC |
| 1764 | 1.19E-06 | 0.272318865  | 0.464 | 0.323 | 0.025974394 | RRAGA     | 6 | RBP7_VEC |
| 1765 | 2.25E-07 | 0.271842645  | 0.162 | 0.06  | 0.004902768 | CDK6      | 6 | RBP7_VEC |
| 1766 | 9.15E-08 | 0.271075816  | 0.184 | 0.071 | 0.001994712 | MAP2      | 6 | RBP7_VEC |
| 1767 | 4.71E-07 | 0.270425638  | 0.972 | 0.837 | 0.01027355  | JUNB      | 6 | RBP7_VEC |
| 1768 | 5.35E-08 | 0.269417461  | 0.19  | 0.073 | 0.001166541 | CTSZ      | 6 | RBP7_VEC |
| 1769 | 4.79E-21 | 0.268952721  | 0.134 | 0.014 | 1.05E-16    | PCDH1     | 6 | RBP7_VEC |
| 1770 | 4.32E-08 | 0.267112276  | 0.196 | 0.076 | 0.000942881 | PLCG2     | 6 | RBP7_VEC |
| 1771 | 1.76E-10 | 0.266289656  | 0.19  | 0.061 | 3.84E-06    | SLC48A1   | 6 | RBP7_VEC |
| 1772 | 9.17E-09 | 0.265081793  | 0.201 | 0.077 | 0.000199876 | FBN1      | 6 | RBP7_VEC |
| 1773 | 4.90E-31 | 0.264153735  | 0.123 | 0.005 | 1.07E-26    | COBLL1    | 6 | RBP7_VEC |
| 1774 | 6.03E-16 | 0.262847218  | 0.168 | 0.033 | 1.32E-11    | CDC14B    | 6 | RBP7_VEC |
| 1775 | 1.01E-13 | 0.261925485  | 0.14  | 0.027 | 2.20E-09    | BEX5      | 6 | RBP7_VEC |
| 1776 | 2.03E-11 | 0.259743312  | 1     | 0.899 | 4.43E-07    | MALAT1    | 6 | RBP7_VEC |
| 1777 | 5.24E-08 | 0.257779295  | 0.145 | 0.048 | 0.001142745 | PARP12    | 6 | RBP7_VEC |
| 1778 | 4.33E-11 | 0.256117517  | 0.994 | 0.96  | 9.44E-07    | HLA-A     | 6 | RBP7_VEC |
| 1779 | 1.81E-09 | 0.255563752  | 0.101 | 0.021 | 3.95E-05    | XPO6      | 6 | RBP7_VEC |
| 1780 | 1.18E-14 | 0.253583668  | 0.14  | 0.025 | 2.57E-10    | FGF2      | 6 | RBP7_VEC |
| 1781 | 4.52E-31 | 0.252254961  | 0.106 | 0.003 | 9.87E-27    | ADAMTSL1  | 6 | RBP7_VEC |
| 1782 | 3.86E-15 | 0.251833127  | 0.117 | 0.017 | 8.43E-11    | MN1       | 6 | RBP7_VEC |
| 1783 | 1.20E-08 | 0.251529982  | 0.196 | 0.072 | 0.000261649 | MSI2      | 6 | RBP7_VEC |
| 1784 | 1.91E-06 | 0.250986588  | 0.358 | 0.212 | 0.041730719 | PDLIM7    | 6 | RBP7_VEC |
| 1785 | 1.47E-11 | -0.250611119 | 0.978 | 0.987 | 3.21E-07    | RPL26     | 6 | RBP7_VEC |
| 1786 | 6.31E-15 | -0.263792246 | 0.983 | 0.991 | 1.38E-10    | RPL32     | 6 | RBP7_VEC |
| 1787 | 6.35E-09 | -0.267974656 | 0.95  | 0.957 | 0.000138536 | UBA52     | 6 | RBP7_VEC |
| 1788 | 2.89E-08 | -0.276118073 | 0.676 | 0.831 | 0.000631087 | SDPR      | 6 | RBP7_VEC |
| 1789 | 2.45E-08 | -0.27767784  | 0.916 | 0.904 | 0.000534705 | APP       | 6 | RBP7_VEC |
| 1790 | 4.05E-18 | -0.281726124 | 0.994 | 0.992 | 8.83E-14    | RPL11     | 6 | RBP7_VEC |
| 1791 | 1.94E-13 | -0.282428302 | 0.972 | 0.975 | 4.24E-09    | RPL18A    | 6 | RBP7_VEC |
| 1792 | 7.83E-08 | -0.283352853 | 0.101 | 0.301 | 0.001708264 | CD82      | 6 | RBP7_VEC |
| 1793 | 5.30E-07 | -0.287675752 | 0.14  | 0.334 | 0.011558434 | SCPEP1    | 6 | RBP7_VEC |
| 1794 | 2.41E-15 | -0.28874998  | 0.978 | 0.98  | 5.25E-11    | RPL18     | 6 | RBP7_VEC |
| 1795 | 9.80E-07 | -0.291783412 | 0.821 | 0.859 | 0.021373988 | CD63      | 6 | RBP7_VEC |
| 1796 | 4.54E-15 | -0.295924604 | 0.966 | 0.987 | 9.90E-11    | RPL29     | 6 | RBP7_VEC |
| 1797 | 3.21E-13 | -0.302286557 | 0.95  | 0.953 | 6.99E-09    | RPL23A    | 6 | RBP7_VEC |
| 1798 | 2.11E-08 | -0.310103536 | 0.67  | 0.819 | 0.000460139 | LDB2      | 6 | RBP7_VEC |
| 1799 | 9.87E-08 | -0.311218683 | 0.201 | 0.411 | 0.002152968 | PRDX4     | 6 | RBP7_VEC |
| 1800 | 4.46E-19 | -0.312641594 | 0.994 | 0.992 | 9.74E-15    | RPS12     | 6 | RBP7_VEC |
| 1801 | 7.94E-20 | -0.313682981 | 0.983 | 0.991 | 1.73E-15    | RPL19     | 6 | RBP7_VEC |
| 1802 | 2.00E-16 | -0.313966762 | 0.966 | 0.977 | 4.37E-12    | RPL37A    | 6 | RBP7_VEC |
| 1803 | 2.23E-06 | -0.316660383 | 0.229 | 0.417 | 0.048536462 | FAM213A   | 6 | RBP7_VEC |
| 1804 | 1.94E-08 | -0.316868737 | 0.777 | 0.861 | 0.000424029 | BST2      | 6 | RBP7_VEC |
| 1805 | 6.71E-14 | -0.32717996  | 0.933 | 0.955 | 1.46E-09    | RPL17     | 6 | RBP7_VEC |
| 1806 | 8.61E-08 | -0.3272423   | 0.754 | 0.848 | 0.001877562 | ALDOA     | 6 | RBP7_VEC |
| 1807 | 5.54E-07 | -0.330242821 | 0.469 | 0.629 | 0.012077765 | ERP29     | 6 | RBP7_VEC |
| 1808 | 3.91E-24 | -0.330590119 | 1     | 0.997 | 8.53E-20    | RPLP1     | 6 | RBP7_VEC |
| 1809 | 1.23E-08 | -0.332142664 | 0.201 | 0.438 | 0.000269201 | PLXDC2    | 6 | RBP7_VEC |
| 1810 | 1.48E-18 | -0.333066216 | 0.978 | 0.982 | 3.22E-14    | RPS7      | 6 | RBP7_VEC |
| 1811 | 6.42E-12 | -0.333897565 | 0.894 | 0.926 | 1.40E-07    | RPL31     | 6 | RBP7_VEC |
| 1812 | 2.24E-08 | -0.336249184 | 0.849 | 0.899 | 0.000489065 | IL6ST     | 6 | RBP7_VEC |
| 1813 | 7.44E-08 | -0.337144856 | 0.128 | 0.332 | 0.001622061 | MYRIP     | 6 | RBP7_VEC |
| 1814 | 1.72E-07 | -0.339391626 | 0.285 | 0.502 | 0.003743909 | TPP1      | 6 | RBP7_VEC |
| 1815 | 3.05E-08 | -0.343299138 | 0.626 | 0.764 | 0.000664574 | ZFAS1     | 6 | RBP7_VEC |
| 1816 | 1.67E-20 | -0.345997823 | 0.983 | 0.991 | 3.64E-16    | RPS19     | 6 | RBP7_VEC |
| 1817 | 8.14E-25 | -0.346957051 | 0.994 | 0.992 | 1.78E-20    | RPL13     | 6 | RBP7_VEC |
| 1818 | 2.80E-23 | -0.348570296 | 0.989 | 0.987 | 6.11E-19    | RPS15     | 6 | RBP7_VEC |



|      |          |              |       |       |             |          |   |          |
|------|----------|--------------|-------|-------|-------------|----------|---|----------|
| 1819 | 1.29E-07 | -0.350439318 | 0.173 | 0.377 | 0.002803998 | TBC1D15  | 6 | RBP7_VEC |
| 1820 | 1.07E-13 | -0.351210206 | 0.877 | 0.922 | 2.33E-09    | RPS5     | 6 | RBP7_VEC |
| 1821 | 3.47E-07 | -0.351981217 | 0.196 | 0.397 | 0.00756152  | ALDH6A1  | 6 | RBP7_VEC |
| 1822 | 1.29E-07 | -0.35212354  | 0.318 | 0.548 | 0.002821437 | OSTC     | 6 | RBP7_VEC |
| 1823 | 1.00E-08 | -0.353086157 | 0.134 | 0.353 | 0.000218676 | CPM      | 6 | RBP7_VEC |
| 1824 | 2.09E-14 | -0.355702208 | 0.894 | 0.934 | 4.55E-10    | RPS2     | 6 | RBP7_VEC |
| 1825 | 3.12E-10 | -0.356345712 | 0.274 | 0.553 | 6.80E-06    | ACTN1    | 6 | RBP7_VEC |
| 1826 | 6.16E-08 | -0.3597966   | 0.229 | 0.436 | 0.001342338 | DEGS1    | 6 | RBP7_VEC |
| 1827 | 1.63E-08 | -0.364667317 | 0.436 | 0.658 | 0.00035555  | SERPING1 | 6 | RBP7_VEC |
| 1828 | 2.60E-22 | -0.366081697 | 0.983 | 0.989 | 5.68E-18    | RPLP2    | 6 | RBP7_VEC |
| 1829 | 1.38E-08 | -0.366806383 | 0.631 | 0.732 | 0.000300824 | ST13     | 6 | RBP7_VEC |
| 1830 | 4.88E-08 | -0.368261001 | 0.173 | 0.378 | 0.001063393 | HIBCH    | 6 | RBP7_VEC |
| 1831 | 6.58E-22 | -0.374314511 | 0.955 | 0.979 | 1.43E-17    | RPS21    | 6 | RBP7_VEC |
| 1832 | 6.76E-13 | -0.3784613   | 0.905 | 0.933 | 1.47E-08    | RPL38    | 6 | RBP7_VEC |
| 1833 | 7.64E-08 | -0.380510732 | 0.631 | 0.806 | 0.00166626  | POLR2L   | 6 | RBP7_VEC |
| 1834 | 8.87E-09 | -0.385528829 | 0.101 | 0.311 | 0.000193439 | NR5A2    | 6 | RBP7_VEC |
| 1835 | 5.23E-07 | -0.386772307 | 0.123 | 0.304 | 0.011409627 | PELO     | 6 | RBP7_VEC |
| 1836 | 4.16E-17 | -0.388242747 | 0.899 | 0.951 | 9.06E-13    | RPL35    | 6 | RBP7_VEC |
| 1837 | 9.31E-11 | -0.388281033 | 0.626 | 0.778 | 2.03E-06    | MYCT1    | 6 | RBP7_VEC |
| 1838 | 1.10E-06 | -0.388370627 | 0.358 | 0.543 | 0.024060524 | RPL22L1  | 6 | RBP7_VEC |
| 1839 | 1.72E-08 | -0.390336683 | 0.218 | 0.442 | 0.000376163 | MPST     | 6 | RBP7_VEC |
| 1840 | 3.16E-11 | -0.391040835 | 0.229 | 0.51  | 6.89E-07    | IL1R1    | 6 | RBP7_VEC |
| 1841 | 2.62E-08 | -0.393316324 | 0.52  | 0.671 | 0.000570477 | LAMP1    | 6 | RBP7_VEC |
| 1842 | 1.36E-10 | -0.394649648 | 0.207 | 0.482 | 2.96E-06    | GPM6A    | 6 | RBP7_VEC |
| 1843 | 2.24E-08 | -0.395397624 | 0.246 | 0.469 | 0.000488634 | CTSF     | 6 | RBP7_VEC |
| 1844 | 4.02E-08 | -0.396941243 | 0.307 | 0.533 | 0.000876276 | LITAF    | 6 | RBP7_VEC |
| 1845 | 2.86E-07 | -0.398140599 | 0.184 | 0.381 | 0.006244866 | GLMP     | 6 | RBP7_VEC |
| 1846 | 1.38E-09 | -0.398806005 | 0.223 | 0.484 | 3.01E-05    | C11orf96 | 6 | RBP7_VEC |
| 1847 | 4.52E-07 | -0.399078102 | 0.184 | 0.36  | 0.009862204 | DAAM1    | 6 | RBP7_VEC |
| 1848 | 1.33E-06 | -0.401816596 | 0.307 | 0.484 | 0.029000778 | PROS1    | 6 | RBP7_VEC |
| 1849 | 5.15E-24 | -0.403788412 | 0.983 | 0.986 | 1.12E-19    | RPS18    | 6 | RBP7_VEC |
| 1850 | 1.56E-06 | -0.404640279 | 0.33  | 0.515 | 0.033916727 | RAPGEF5  | 6 | RBP7_VEC |
| 1851 | 8.77E-09 | -0.406163835 | 0.603 | 0.766 | 0.000191239 | S100A13  | 6 | RBP7_VEC |
| 1852 | 1.90E-08 | -0.407257251 | 0.369 | 0.592 | 0.000413857 | CUTA     | 6 | RBP7_VEC |
| 1853 | 2.42E-31 | -0.408072114 | 0.989 | 0.996 | 5.27E-27    | TPT1     | 6 | RBP7_VEC |
| 1854 | 1.20E-15 | -0.409348377 | 0.821 | 0.918 | 2.62E-11    | RPS29    | 6 | RBP7_VEC |
| 1855 | 4.56E-08 | -0.412173872 | 0.274 | 0.483 | 0.00099337  | TRAPPC5  | 6 | RBP7_VEC |
| 1856 | 8.14E-10 | -0.412320756 | 0.117 | 0.352 | 1.78E-05    | MID1     | 6 | RBP7_VEC |
| 1857 | 1.28E-09 | -0.413801112 | 0.168 | 0.413 | 2.79E-05    | C1orf21  | 6 | RBP7_VEC |
| 1858 | 6.54E-12 | -0.414527564 | 0.682 | 0.86  | 1.43E-07    | PDLIM1   | 6 | RBP7_VEC |
| 1859 | 3.62E-09 | -0.418140558 | 0.659 | 0.769 | 7.90E-05    | PDIA3    | 6 | RBP7_VEC |
| 1860 | 3.40E-22 | -0.4255927   | 0.955 | 0.955 | 7.41E-18    | RPS9     | 6 | RBP7_VEC |
| 1861 | 7.81E-11 | -0.426904308 | 0.19  | 0.452 | 1.70E-06    | CSF1     | 6 | RBP7_VEC |
| 1862 | 1.79E-10 | -0.428945704 | 0.76  | 0.834 | 3.90E-06    | NDUFA4   | 6 | RBP7_VEC |
| 1863 | 1.21E-08 | -0.430156217 | 0.318 | 0.543 | 0.000264847 | SMTN     | 6 | RBP7_VEC |
| 1864 | 4.20E-14 | -0.431083134 | 0.81  | 0.904 | 9.16E-10    | ATP5G2   | 6 | RBP7_VEC |
| 1865 | 2.96E-28 | -0.432879094 | 0.966 | 0.991 | 6.46E-24    | RPL36    | 6 | RBP7_VEC |
| 1866 | 7.36E-38 | -0.433159786 | 0.994 | 0.994 | 1.60E-33    | RPS28    | 6 | RBP7_VEC |
| 1867 | 4.06E-13 | -0.438553973 | 0.788 | 0.882 | 8.86E-09    | GABARAP  | 6 | RBP7_VEC |
| 1868 | 7.45E-10 | -0.439845373 | 0.151 | 0.391 | 1.63E-05    | BLCAP    | 6 | RBP7_VEC |
| 1869 | 2.99E-10 | -0.440897427 | 0.408 | 0.678 | 6.51E-06    | GMFG     | 6 | RBP7_VEC |
| 1870 | 1.05E-07 | -0.441268422 | 0.201 | 0.394 | 0.002285715 | SLC35A1  | 6 | RBP7_VEC |
| 1871 | 3.30E-09 | -0.441416921 | 0.38  | 0.589 | 7.19E-05    | CD164    | 6 | RBP7_VEC |
| 1872 | 1.55E-11 | -0.442713486 | 0.749 | 0.816 | 3.39E-07    | PSAP     | 6 | RBP7_VEC |
| 1873 | 1.59E-29 | -0.447830871 | 0.978 | 0.991 | 3.48E-25    | RPL37    | 6 | RBP7_VEC |
| 1874 | 1.62E-12 | -0.449164565 | 0.553 | 0.745 | 3.53E-08    | CTSB     | 6 | RBP7_VEC |
| 1875 | 1.19E-10 | -0.451681472 | 0.581 | 0.728 | 2.59E-06    | PNPLA2   | 6 | RBP7_VEC |
| 1876 | 9.03E-14 | -0.452931736 | 0.352 | 0.657 | 1.97E-09    | TGFBR3   | 6 | RBP7_VEC |
| 1877 | 1.78E-10 | -0.453103193 | 0.52  | 0.725 | 3.88E-06    | S100A16  | 6 | RBP7_VEC |
| 1878 | 3.82E-08 | -0.457308412 | 0.341 | 0.55  | 0.00083332  | UGCG     | 6 | RBP7_VEC |
| 1879 | 5.68E-10 | -0.45877007  | 0.313 | 0.562 | 1.24E-05    | GRINA    | 6 | RBP7_VEC |
| 1880 | 2.06E-07 | -0.460198444 | 0.559 | 0.698 | 0.004488928 | LPAR6    | 6 | RBP7_VEC |
| 1881 | 5.95E-09 | -0.461436461 | 0.117 | 0.328 | 0.000129826 | EIF4EBP1 | 6 | RBP7_VEC |
| 1882 | 7.00E-10 | -0.464424105 | 0.19  | 0.427 | 1.53E-05    | AKR1B1   | 6 | RBP7_VEC |
| 1883 | 1.17E-08 | -0.467512402 | 0.581 | 0.749 | 0.000254752 | PRSS23   | 6 | RBP7_VEC |
| 1884 | 2.58E-08 | -0.469768681 | 0.207 | 0.424 | 0.000563681 | FAM167B  | 6 | RBP7_VEC |
| 1885 | 1.23E-10 | -0.471208059 | 0.486 | 0.699 | 2.68E-06    | CYBA     | 6 | RBP7_VEC |
| 1886 | 1.33E-13 | -0.471998853 | 0.609 | 0.79  | 2.90E-09    | GYPC     | 6 | RBP7_VEC |
| 1887 | 1.57E-11 | -0.47485097  | 0.436 | 0.685 | 3.42E-07    | HEBP1    | 6 | RBP7_VEC |
| 1888 | 1.20E-08 | -0.47547503  | 0.341 | 0.536 | 0.000261106 | SEMA6A   | 6 | RBP7_VEC |

|      |          |              |       |       |             |          |   |          |
|------|----------|--------------|-------|-------|-------------|----------|---|----------|
| 1889 | 7.06E-09 | -0.480697307 | 0.296 | 0.51  | 0.000154026 | DAB2     | 6 | RBP7_VEC |
| 1890 | 4.57E-11 | -0.481517227 | 0.184 | 0.451 | 9.96E-07    | CD302    | 6 | RBP7_VEC |
| 1891 | 2.65E-08 | -0.484397522 | 0.341 | 0.558 | 0.00057817  | RBP1     | 6 | RBP7_VEC |
| 1892 | 1.32E-09 | -0.486390648 | 0.201 | 0.421 | 2.88E-05    | PXDN     | 6 | RBP7_VEC |
| 1893 | 1.13E-11 | -0.487572687 | 0.62  | 0.759 | 2.47E-07    | GRN      | 6 | RBP7_VEC |
| 1894 | 4.14E-08 | -0.487825458 | 0.296 | 0.509 | 0.000903352 | NRP2     | 6 | RBP7_VEC |
| 1895 | 6.67E-20 | -0.496938715 | 0.749 | 0.888 | 1.45E-15    | FXD5     | 6 | RBP7_VEC |
| 1896 | 3.46E-09 | -0.498641655 | 0.156 | 0.373 | 7.55E-05    | TSN      | 6 | RBP7_VEC |
| 1897 | 1.14E-09 | -0.501515418 | 0.106 | 0.336 | 2.48E-05    | FAM84A   | 6 | RBP7_VEC |
| 1898 | 3.00E-41 | -0.502027584 | 0.989 | 0.995 | 6.54E-37    | RPL28    | 6 | RBP7_VEC |
| 1899 | 6.37E-08 | -0.504650354 | 0.408 | 0.601 | 0.001389846 | MYC      | 6 | RBP7_VEC |
| 1900 | 2.09E-13 | -0.517924939 | 0.279 | 0.577 | 4.57E-09    | SAT2     | 6 | RBP7_VEC |
| 1901 | 2.04E-14 | -0.51988851  | 0.57  | 0.766 | 4.45E-10    | SERP1    | 6 | RBP7_VEC |
| 1902 | 1.57E-11 | -0.520212934 | 0.285 | 0.526 | 3.43E-07    | SNX2     | 6 | RBP7_VEC |
| 1903 | 3.40E-32 | -0.520813247 | 0.961 | 0.986 | 7.42E-28    | RPL12    | 6 | RBP7_VEC |
| 1904 | 9.02E-12 | -0.522465835 | 0.263 | 0.536 | 1.97E-07    | DENND4C  | 6 | RBP7_VEC |
| 1905 | 6.80E-13 | -0.52506624  | 0.128 | 0.412 | 1.48E-08    | MYO10    | 6 | RBP7_VEC |
| 1906 | 1.04E-14 | -0.542110448 | 0.575 | 0.751 | 2.26E-10    | PDIA6    | 6 | RBP7_VEC |
| 1907 | 3.37E-19 | -0.544645325 | 0.112 | 0.481 | 7.35E-15    | NR2F1    | 6 | RBP7_VEC |
| 1908 | 1.12E-12 | -0.555131625 | 0.117 | 0.392 | 2.44E-08    | RAB20    | 6 | RBP7_VEC |
| 1909 | 7.49E-13 | -0.557367313 | 0.196 | 0.484 | 1.63E-08    | TSPAN6   | 6 | RBP7_VEC |
| 1910 | 4.86E-13 | -0.557756159 | 0.514 | 0.707 | 1.06E-08    | CLEC2B   | 6 | RBP7_VEC |
| 1911 | 4.91E-16 | -0.560497908 | 0.52  | 0.761 | 1.07E-11    | GSTO1    | 6 | RBP7_VEC |
| 1912 | 7.74E-13 | -0.565592586 | 0.223 | 0.498 | 1.69E-08    | TMEM2    | 6 | RBP7_VEC |
| 1913 | 9.23E-15 | -0.567050747 | 0.743 | 0.866 | 2.01E-10    | RAMP3    | 6 | RBP7_VEC |
| 1914 | 1.61E-10 | -0.567725855 | 0.346 | 0.586 | 3.51E-06    | PLIN2    | 6 | RBP7_VEC |
| 1915 | 6.09E-24 | -0.596367416 | 0.821 | 0.917 | 1.33E-19    | PPIB     | 6 | RBP7_VEC |
| 1916 | 9.33E-18 | -0.597556158 | 0.559 | 0.783 | 2.04E-13    | PRCP     | 6 | RBP7_VEC |
| 1917 | 8.48E-15 | -0.599405878 | 0.542 | 0.737 | 1.85E-10    | PPFIBP1  | 6 | RBP7_VEC |
| 1918 | 1.50E-14 | -0.604245228 | 0.603 | 0.778 | 3.28E-10    | CSTB     | 6 | RBP7_VEC |
| 1919 | 3.21E-18 | -0.611618769 | 0.603 | 0.784 | 6.99E-14    | CLTA     | 6 | RBP7_VEC |
| 1920 | 6.04E-13 | -0.612569942 | 0.425 | 0.648 | 1.32E-08    | CTSA     | 6 | RBP7_VEC |
| 1921 | 5.92E-14 | -0.616875019 | 0.24  | 0.534 | 1.29E-09    | NPY1R    | 6 | RBP7_VEC |
| 1922 | 4.89E-13 | -0.617204879 | 0.112 | 0.392 | 1.07E-08    | LRG1     | 6 | RBP7_VEC |
| 1923 | 2.45E-18 | -0.618622173 | 0.464 | 0.764 | 5.34E-14    | AKAP12   | 6 | RBP7_VEC |
| 1924 | 2.60E-17 | -0.623463067 | 0.715 | 0.851 | 5.67E-13    | CALR     | 6 | RBP7_VEC |
| 1925 | 6.51E-16 | -0.635068195 | 0.402 | 0.677 | 1.42E-11    | GLO1     | 6 | RBP7_VEC |
| 1926 | 6.26E-20 | -0.641901351 | 0.754 | 0.902 | 1.37E-15    | HSP90B1  | 6 | RBP7_VEC |
| 1927 | 5.30E-19 | -0.641902092 | 0.43  | 0.75  | 1.16E-14    | HIF1A    | 6 | RBP7_VEC |
| 1928 | 1.65E-19 | -0.657710325 | 0.564 | 0.784 | 3.60E-15    | AP2S1    | 6 | RBP7_VEC |
| 1929 | 6.49E-16 | -0.664225338 | 0.235 | 0.549 | 1.41E-11    | CCNG1    | 6 | RBP7_VEC |
| 1930 | 2.22E-18 | -0.673126023 | 0.162 | 0.515 | 4.84E-14    | ST6GAL1  | 6 | RBP7_VEC |
| 1931 | 2.81E-16 | -0.683798726 | 0.134 | 0.454 | 6.13E-12    | MZT2A    | 6 | RBP7_VEC |
| 1932 | 5.65E-17 | -0.691504058 | 0.251 | 0.566 | 1.23E-12    | LRRFIP2  | 6 | RBP7_VEC |
| 1933 | 2.84E-13 | -0.691547921 | 0.156 | 0.456 | 6.19E-09    | OLFM1    | 6 | RBP7_VEC |
| 1934 | 1.02E-18 | -0.692060107 | 0.469 | 0.759 | 2.23E-14    | NAMPT    | 6 | RBP7_VEC |
| 1935 | 6.49E-14 | -0.695713904 | 0.458 | 0.698 | 1.42E-09    | PDK4     | 6 | RBP7_VEC |
| 1936 | 2.62E-20 | -0.695791341 | 0.497 | 0.739 | 5.72E-16    | TMEM123  | 6 | RBP7_VEC |
| 1937 | 2.95E-14 | -0.701049769 | 0.128 | 0.431 | 6.44E-10    | MATN2    | 6 | RBP7_VEC |
| 1938 | 2.47E-27 | -0.703017652 | 0.665 | 0.852 | 5.39E-23    | TSPAN7   | 6 | RBP7_VEC |
| 1939 | 2.02E-19 | -0.721561238 | 0.425 | 0.717 | 4.40E-15    | SERPINB1 | 6 | RBP7_VEC |
| 1940 | 1.51E-53 | -0.723708748 | 0.978 | 0.995 | 3.29E-49    | RPL39    | 6 | RBP7_VEC |
| 1941 | 9.62E-21 | -0.7302821   | 0.564 | 0.815 | 2.10E-16    | PLPP3    | 6 | RBP7_VEC |
| 1942 | 1.58E-20 | -0.732852723 | 0.318 | 0.665 | 3.44E-16    | NTN4     | 6 | RBP7_VEC |
| 1943 | 3.03E-31 | -0.746606888 | 0.659 | 0.875 | 6.61E-27    | NPC2     | 6 | RBP7_VEC |
| 1944 | 2.31E-25 | -0.759386388 | 0.151 | 0.607 | 5.03E-21    | MMRN1    | 6 | RBP7_VEC |
| 1945 | 8.35E-23 | -0.791794835 | 0.123 | 0.515 | 1.82E-18    | C1QTNF1  | 6 | RBP7_VEC |
| 1946 | 3.93E-34 | -0.802432549 | 0.497 | 0.91  | 8.56E-30    | IL33     | 6 | RBP7_VEC |
| 1947 | 3.33E-22 | -0.811207956 | 0.263 | 0.659 | 7.27E-18    | SRPX     | 6 | RBP7_VEC |
| 1948 | 1.07E-19 | -0.81831511  | 0.196 | 0.565 | 2.33E-15    | BGN      | 6 | RBP7_VEC |
| 1949 | 2.27E-18 | -0.825017169 | 0.229 | 0.551 | 4.96E-14    | NID1     | 6 | RBP7_VEC |
| 1950 | 2.78E-23 | -0.838992562 | 0.218 | 0.617 | 6.07E-19    | NUPR1    | 6 | RBP7_VEC |
| 1951 | 1.63E-24 | -0.856514542 | 0.43  | 0.726 | 3.55E-20    | P4HB     | 6 | RBP7_VEC |
| 1952 | 5.25E-24 | -0.857650092 | 0.246 | 0.629 | 1.14E-19    | SNX5     | 6 | RBP7_VEC |
| 1953 | 3.65E-18 | -0.85867055  | 0.38  | 0.682 | 7.96E-14    | ADM      | 6 | RBP7_VEC |
| 1954 | 1.36E-52 | -0.861009613 | 0.972 | 0.992 | 2.96E-48    | FTL      | 6 | RBP7_VEC |
| 1955 | 4.42E-25 | -0.863981115 | 0.43  | 0.805 | 9.64E-21    | LIFR     | 6 | RBP7_VEC |
| 1956 | 3.06E-28 | -0.884408774 | 0.246 | 0.665 | 6.68E-24    | F2R      | 6 | RBP7_VEC |
| 1957 | 3.14E-29 | -0.889764925 | 0.453 | 0.803 | 6.84E-25    | MARCKSL1 | 6 | RBP7_VEC |
| 1958 | 6.19E-25 | -0.904785426 | 0.263 | 0.646 | 1.35E-20    | SLC40A1  | 6 | RBP7_VEC |

|      |           |              |       |       |             |          |   |           |
|------|-----------|--------------|-------|-------|-------------|----------|---|-----------|
| 1959 | 6.71E-24  | -0.920646475 | 0.268 | 0.64  | 1.46E-19    | COTL1    | 6 | RBP7_VEC  |
| 1960 | 1.36E-28  | -0.928171276 | 0.279 | 0.693 | 2.97E-24    | LY96     | 6 | RBP7_VEC  |
| 1961 | 2.88E-42  | -0.934437795 | 0.648 | 0.886 | 6.28E-38    | FCGRT    | 6 | RBP7_VEC  |
| 1962 | 1.62E-34  | -0.947973355 | 0.179 | 0.737 | 3.53E-30    | C7       | 6 | RBP7_VEC  |
| 1963 | 3.35E-24  | -0.957733282 | 0.168 | 0.595 | 7.30E-20    | TFPI2    | 6 | RBP7_VEC  |
| 1964 | 3.75E-09  | -0.960720907 | 0.173 | 0.403 | 8.17E-05    | CCL2     | 6 | RBP7_VEC  |
| 1965 | 5.75E-16  | -1.033940411 | 0.263 | 0.585 | 1.25E-11    | CXCL2    | 6 | RBP7_VEC  |
| 1966 | 9.20E-29  | -1.053560577 | 0.268 | 0.689 | 2.01E-24    | MAF      | 6 | RBP7_VEC  |
| 1967 | 3.43E-56  | -1.059618917 | 0.564 | 0.965 | 7.49E-52    | TFPI     | 6 | RBP7_VEC  |
| 1968 | 9.47E-34  | -1.147146424 | 0.296 | 0.723 | 2.07E-29    | ASAH1    | 6 | RBP7_VEC  |
| 1969 | 5.65E-54  | -1.211642985 | 0.508 | 0.98  | 1.23E-49    | CCL14    | 6 | RBP7_VEC  |
| 1970 | 1.88E-38  | -1.279699142 | 0.447 | 0.829 | 4.11E-34    | CRHBP    | 6 | RBP7_VEC  |
| 1971 | 2.84E-34  | -1.282792695 | 0.564 | 0.845 | 6.19E-30    | FCN3     | 6 | RBP7_VEC  |
| 1972 | 9.16E-59  | -1.321621588 | 0.81  | 0.984 | 2.00E-54    | TIMP1    | 6 | RBP7_VEC  |
| 1973 | 4.68E-41  | -1.39481315  | 0.128 | 0.66  | 1.02E-36    | CXCL16   | 6 | RBP7_VEC  |
| 1974 | 1.13E-38  | -1.487620962 | 0.201 | 0.72  | 2.46E-34    | STAB1    | 6 | RBP7_VEC  |
| 1975 | 9.62E-40  | -1.538416681 | 0.179 | 0.685 | 2.10E-35    | CD4      | 6 | RBP7_VEC  |
| 1976 | 2.48E-48  | -1.588404253 | 0.642 | 0.909 | 5.40E-44    | SEPP1    | 6 | RBP7_VEC  |
| 1977 | 2.56E-54  | -1.711925986 | 0.151 | 0.766 | 5.58E-50    | MRC1     | 6 | RBP7_VEC  |
| 1978 | 7.53E-53  | -1.724787207 | 0.447 | 0.868 | 1.64E-48    | DNASE1L3 | 6 | RBP7_VEC  |
| 1979 | 6.15E-50  | -1.82645604  | 0.33  | 0.812 | 1.34E-45    | LGMN     | 6 | RBP7_VEC  |
| 1980 | 3.34E-56  | -1.868624136 | 0.486 | 0.86  | 7.29E-52    | CTSD     | 6 | RBP7_VEC  |
| 1981 | 1.50E-46  | -2.223183533 | 0.564 | 0.847 | 3.28E-42    | CTSL     | 6 | RBP7_VEC  |
| 1982 | 2.67E-85  | 1.995264483  | 0.592 | 0.027 | 5.83E-81    | PTGDS    | 7 | PTGDS_VEC |
| 1983 | 6.61E-112 | 1.905926259  | 0.837 | 0.044 | 1.44E-107   | ADGRG6   | 7 | PTGDS_VEC |
| 1984 | 7.56E-59  | 1.875905242  | 0.429 | 0.02  | 1.65E-54    | POSTN    | 7 | PTGDS_VEC |
| 1985 | 2.35E-88  | 1.795976522  | 0.776 | 0.051 | 5.12E-84    | TAGLN    | 7 | PTGDS_VEC |
| 1986 | 1.13E-53  | 1.75720721   | 0.633 | 0.059 | 2.47E-49    | IL1RL1   | 7 | PTGDS_VEC |
| 1987 | 6.13E-158 | 1.70372494   | 0.755 | 0.017 | 1.34E-153   | RSPO3    | 7 | PTGDS_VEC |
| 1988 | 6.25E-43  | 1.655958205  | 0.898 | 0.193 | 1.36E-38    | LTC4S    | 7 | PTGDS_VEC |
| 1989 | 8.10E-40  | 1.582440949  | 0.49  | 0.046 | 1.77E-35    | SELE     | 7 | PTGDS_VEC |
| 1990 | 6.94E-08  | 1.555823722  | 0.388 | 0.139 | 0.001513056 | CXCL3    | 7 | PTGDS_VEC |
| 1991 | 5.14E-19  | 1.517542621  | 0.816 | 0.321 | 1.12E-14    | VWF      | 7 | PTGDS_VEC |
| 1992 | 1.34E-123 | 1.502188431  | 0.776 | 0.03  | 2.92E-119   | SELP     | 7 | PTGDS_VEC |
| 1993 | 4.29E-08  | 1.481846708  | 0.408 | 0.153 | 0.000934634 | CXCL8    | 7 | PTGDS_VEC |
| 1994 | 6.73E-25  | 1.441533538  | 0.327 | 0.033 | 1.47E-20    | CXCL1    | 7 | PTGDS_VEC |
| 1995 | 1.63E-35  | 1.416567505  | 0.367 | 0.028 | 3.55E-31    | CSF3     | 7 | PTGDS_VEC |
| 1996 | 6.55E-89  | 1.411746371  | 0.755 | 0.045 | 1.43E-84    | INMT     | 7 | PTGDS_VEC |
| 1997 | 3.79E-65  | 1.359953026  | 0.714 | 0.059 | 8.27E-61    | FBLN2    | 7 | PTGDS_VEC |
| 1998 | 6.22E-17  | 1.344368441  | 0.469 | 0.103 | 1.36E-12    | CTGF     | 7 | PTGDS_VEC |
| 1999 | 4.28E-23  | 1.314360076  | 1     | 0.725 | 9.33E-19    | PRSS23   | 7 | PTGDS_VEC |
| 2000 | 6.06E-39  | 1.314011783  | 0.776 | 0.137 | 1.32E-34    | PKHD1L1  | 7 | PTGDS_VEC |
| 2001 | 7.74E-25  | 1.289140957  | 0.959 | 0.468 | 1.69E-20    | IL1R1    | 7 | PTGDS_VEC |
| 2002 | 1.55E-17  | 1.271617849  | 0.98  | 0.672 | 3.38E-13    | C7       | 7 | PTGDS_VEC |
| 2003 | 1.67E-18  | 1.245393577  | 1     | 0.783 | 3.65E-14    | RNASE1   | 7 | PTGDS_VEC |
| 2004 | 1.04E-06  | 1.240966792  | 0.694 | 0.479 | 0.022753243 | SOD2     | 7 | PTGDS_VEC |
| 2005 | 5.14E-58  | 1.217341097  | 0.714 | 0.07  | 1.12E-53    | PTGS1    | 7 | PTGDS_VEC |
| 2006 | 1.20E-16  | 1.212341881  | 0.837 | 0.383 | 2.62E-12    | PLAC8    | 7 | PTGDS_VEC |
| 2007 | 5.65E-96  | 1.133294833  | 0.694 | 0.033 | 1.23E-91    | TSHZ2    | 7 | PTGDS_VEC |
| 2008 | 1.94E-69  | 1.10754227   | 0.531 | 0.026 | 4.23E-65    | ACKR1    | 7 | PTGDS_VEC |
| 2009 | 6.01E-39  | 1.087615072  | 0.714 | 0.099 | 1.31E-34    | CPE      | 7 | PTGDS_VEC |
| 2010 | 6.24E-16  | 1.079080362  | 0.327 | 0.052 | 1.36E-11    | IL6      | 7 | PTGDS_VEC |
| 2011 | 2.75E-08  | 1.061794603  | 0.98  | 0.879 | 0.000599714 | MT2A     | 7 | PTGDS_VEC |
| 2012 | 2.86E-19  | 1.052779658  | 0.408 | 0.072 | 6.24E-15    | GPRC5A   | 7 | PTGDS_VEC |
| 2013 | 2.58E-22  | 1.036944827  | 0.694 | 0.178 | 5.63E-18    | DUSP23   | 7 | PTGDS_VEC |
| 2014 | 7.37E-25  | 1.016184675  | 0.898 | 0.267 | 1.61E-20    | CLU      | 7 | PTGDS_VEC |
| 2015 | 5.06E-97  | 0.997975325  | 0.347 | 0.003 | 1.10E-92    | LYPD2    | 7 | PTGDS_VEC |
| 2016 | 6.46E-08  | 0.993269418  | 0.796 | 0.519 | 0.001409436 | ICAM1    | 7 | PTGDS_VEC |
| 2017 | 1.88E-11  | 0.983027078  | 0.286 | 0.056 | 4.10E-07    | FSTL3    | 7 | PTGDS_VEC |
| 2018 | 8.91E-11  | 0.974138625  | 0.857 | 0.543 | 1.94E-06    | CXCL2    | 7 | PTGDS_VEC |
| 2019 | 3.80E-11  | 0.902929782  | 0.388 | 0.101 | 8.28E-07    | ARAP2    | 7 | PTGDS_VEC |
| 2020 | 9.03E-09  | 0.893329793  | 0.673 | 0.32  | 0.000196914 | NDRG1    | 7 | PTGDS_VEC |
| 2021 | 1.33E-15  | 0.892648109  | 0.531 | 0.138 | 2.89E-11    | FGL2     | 7 | PTGDS_VEC |
| 2022 | 1.81E-11  | 0.860837388  | 0.571 | 0.212 | 3.95E-07    | PROCR    | 7 | PTGDS_VEC |
| 2023 | 2.54E-16  | 0.860334483  | 0.49  | 0.117 | 5.54E-12    | PELI2    | 7 | PTGDS_VEC |
| 2024 | 1.47E-30  | 0.853514591  | 0.531 | 0.075 | 3.21E-26    | RARRES1  | 7 | PTGDS_VEC |
| 2025 | 2.27E-40  | 0.847989956  | 0.388 | 0.027 | 4.94E-36    | CFH      | 7 | PTGDS_VEC |
| 2026 | 1.75E-57  | 0.843188785  | 0.469 | 0.026 | 3.82E-53    | RAB3C    | 7 | PTGDS_VEC |
| 2027 | 3.57E-38  | 0.839034744  | 0.531 | 0.056 | 7.79E-34    | PTGIS    | 7 | PTGDS_VEC |
| 2028 | 1.46E-17  | 0.828323541  | 0.694 | 0.215 | 3.19E-13    | FGFR1    | 7 | PTGDS_VEC |

|      |           |             |       |       |             |              |   |           |
|------|-----------|-------------|-------|-------|-------------|--------------|---|-----------|
| 2029 | 3.71E-13  | 0.793475805 | 0.571 | 0.176 | 8.10E-09    | PLAT         | 7 | PTGDS_VEC |
| 2030 | 4.19E-17  | 0.787761823 | 0.429 | 0.083 | 9.14E-13    | PIR          | 7 | PTGDS_VEC |
| 2031 | 2.16E-14  | 0.774339533 | 1     | 0.85  | 4.71E-10    | RAMP3        | 7 | PTGDS_VEC |
| 2032 | 1.13E-15  | 0.762824151 | 0.408 | 0.085 | 2.47E-11    | MAOA         | 7 | PTGDS_VEC |
| 2033 | 3.87E-33  | 0.755231224 | 0.429 | 0.041 | 8.43E-29    | HLA-DQA1     | 7 | PTGDS_VEC |
| 2034 | 2.01E-08  | 0.75023372  | 0.939 | 0.762 | 0.000439409 | LIFR         | 7 | PTGDS_VEC |
| 2035 | 6.72E-09  | 0.748572734 | 0.408 | 0.131 | 0.000146605 | GJA1         | 7 | PTGDS_VEC |
| 2036 | 2.78E-12  | 0.737071566 | 0.857 | 0.432 | 6.07E-08    | NR2F1        | 7 | PTGDS_VEC |
| 2037 | 1.66E-12  | 0.720133967 | 0.98  | 0.609 | 3.63E-08    | SRPX         | 7 | PTGDS_VEC |
| 2038 | 5.16E-08  | 0.716349975 | 0.551 | 0.24  | 0.001125789 | ALPL         | 7 | PTGDS_VEC |
| 2039 | 1.86E-10  | 0.711093791 | 0.837 | 0.579 | 4.06E-06    | LY6E         | 7 | PTGDS_VEC |
| 2040 | 1.33E-10  | 0.710806949 | 0.571 | 0.222 | 2.89E-06    | TBPL1        | 7 | PTGDS_VEC |
| 2041 | 5.34E-12  | 0.708939841 | 0.571 | 0.189 | 1.17E-07    | ACKR3        | 7 | PTGDS_VEC |
| 2042 | 2.09E-99  | 0.706048973 | 0.388 | 0.005 | 4.55E-95    | LHX6         | 7 | PTGDS_VEC |
| 2043 | 1.66E-08  | 0.69949832  | 0.796 | 0.475 | 0.000361548 | CEBPD        | 7 | PTGDS_VEC |
| 2044 | 1.87E-11  | 0.681571839 | 0.429 | 0.116 | 4.08E-07    | HS3ST1       | 7 | PTGDS_VEC |
| 2045 | 9.01E-09  | 0.681395112 | 0.816 | 0.534 | 0.000196574 | LIMS2        | 7 | PTGDS_VEC |
| 2046 | 3.21E-09  | 0.67398844  | 0.755 | 0.432 | 7.00E-05    | EMP3         | 7 | PTGDS_VEC |
| 2047 | 2.81E-10  | 0.665533153 | 0.469 | 0.156 | 6.12E-06    | FOXC1        | 7 | PTGDS_VEC |
| 2048 | 2.83E-09  | 0.663528095 | 0.939 | 0.74  | 6.18E-05    | PTPRB        | 7 | PTGDS_VEC |
| 2049 | 4.73E-07  | 0.659881893 | 0.633 | 0.352 | 0.010323828 | CRIM1        | 7 | PTGDS_VEC |
| 2050 | 1.98E-18  | 0.656208875 | 0.367 | 0.056 | 4.32E-14    | NTS          | 7 | PTGDS_VEC |
| 2051 | 3.73E-18  | 0.652221979 | 0.306 | 0.04  | 8.14E-14    | TNXB         | 7 | PTGDS_VEC |
| 2052 | 6.26E-09  | 0.651275579 | 0.265 | 0.061 | 0.00013657  | MPZL2        | 7 | PTGDS_VEC |
| 2053 | 1.28E-08  | 0.648705601 | 0.755 | 0.446 | 0.000278238 | GPM6A        | 7 | PTGDS_VEC |
| 2054 | 1.48E-07  | 0.638174557 | 0.837 | 0.553 | 0.003217148 | MMRN1        | 7 | PTGDS_VEC |
| 2055 | 1.35E-10  | 0.634988681 | 0.49  | 0.164 | 2.95E-06    | IPO5         | 7 | PTGDS_VEC |
| 2056 | 1.31E-17  | 0.629161037 | 0.327 | 0.048 | 2.86E-13    | EPB41L3      | 7 | PTGDS_VEC |
| 2057 | 1.02E-36  | 0.621950515 | 0.469 | 0.045 | 2.22E-32    | TMOD1        | 7 | PTGDS_VEC |
| 2058 | 6.40E-08  | 0.619763094 | 0.857 | 0.571 | 0.001396246 | SH3BP5       | 7 | PTGDS_VEC |
| 2059 | 1.25E-08  | 0.613231716 | 1     | 0.864 | 0.000273526 | HLA-DRB1     | 7 | PTGDS_VEC |
| 2060 | 2.04E-08  | 0.602184056 | 0.592 | 0.262 | 0.000444787 | PDLIM3       | 7 | PTGDS_VEC |
| 2061 | 3.77E-08  | 0.59423993  | 0.408 | 0.142 | 0.000821572 | NRIP1        | 7 | PTGDS_VEC |
| 2062 | 4.60E-11  | 0.592605765 | 0.735 | 0.337 | 1.00E-06    | SNTB2        | 7 | PTGDS_VEC |
| 2063 | 1.32E-14  | 0.590008396 | 0.469 | 0.114 | 2.89E-10    | RAB27A       | 7 | PTGDS_VEC |
| 2064 | 2.62E-42  | 0.586499925 | 0.265 | 0.01  | 5.72E-38    | PTHLH        | 7 | PTGDS_VEC |
| 2065 | 2.95E-07  | 0.585515807 | 0.857 | 0.588 | 0.006432455 | TAGLN2       | 7 | PTGDS_VEC |
| 2066 | 9.04E-31  | 0.583679165 | 0.306 | 0.022 | 1.97E-26    | TLL1         | 7 | PTGDS_VEC |
| 2067 | 1.14E-06  | 0.582655572 | 0.306 | 0.097 | 0.024898784 | LDLRAD3      | 7 | PTGDS_VEC |
| 2068 | 1.36E-85  | 0.568914604 | 0.327 | 0.004 | 2.97E-81    | F5           | 7 | PTGDS_VEC |
| 2069 | 9.09E-07  | 0.562602709 | 0.408 | 0.164 | 0.019813318 | UAP1         | 7 | PTGDS_VEC |
| 2070 | 1.31E-07  | 0.559981643 | 0.714 | 0.404 | 0.002864342 | HIPK2        | 7 | PTGDS_VEC |
| 2071 | 2.14E-08  | 0.551091471 | 0.531 | 0.202 | 0.000465821 | CD34         | 7 | PTGDS_VEC |
| 2072 | 1.24E-07  | 0.54848494  | 0.694 | 0.362 | 0.002696524 | CALD1        | 7 | PTGDS_VEC |
| 2073 | 1.23E-06  | 0.542178233 | 0.633 | 0.351 | 0.026849694 | KRAS         | 7 | PTGDS_VEC |
| 2074 | 3.22E-17  | 0.540233641 | 0.449 | 0.089 | 7.02E-13    | PGM5         | 7 | PTGDS_VEC |
| 2075 | 4.72E-08  | 0.538003823 | 0.531 | 0.221 | 0.001028335 | PLCB1        | 7 | PTGDS_VEC |
| 2076 | 1.85E-06  | 0.536046741 | 0.551 | 0.281 | 0.040317469 | RENBP        | 7 | PTGDS_VEC |
| 2077 | 6.17E-53  | 0.535600135 | 0.286 | 0.008 | 1.34E-48    | CDH23        | 7 | PTGDS_VEC |
| 2078 | 9.69E-08  | 0.52472839  | 0.898 | 0.594 | 0.002112574 | S100A6       | 7 | PTGDS_VEC |
| 2079 | 1.42E-17  | 0.524288003 | 0.408 | 0.07  | 3.10E-13    | CTSC         | 7 | PTGDS_VEC |
| 2080 | 7.83E-08  | 0.515672875 | 0.939 | 0.742 | 0.001706679 | HLA-DRB5     | 7 | PTGDS_VEC |
| 2081 | 2.93E-15  | 0.514528548 | 0.429 | 0.094 | 6.39E-11    | RARB         | 7 | PTGDS_VEC |
| 2082 | 2.39E-08  | 0.512386015 | 0.306 | 0.083 | 0.000521912 | MED24        | 7 | PTGDS_VEC |
| 2083 | 3.80E-20  | 0.509783514 | 0.163 | 0.009 | 8.28E-16    | CYP26B1      | 7 | PTGDS_VEC |
| 2084 | 2.62E-15  | 0.502567296 | 0.388 | 0.071 | 5.71E-11    | PLCXD3       | 7 | PTGDS_VEC |
| 2085 | 8.84E-07  | 0.495658189 | 0.796 | 0.537 | 0.019285117 | CFLAR        | 7 | PTGDS_VEC |
| 2086 | 1.76E-07  | 0.494935921 | 0.327 | 0.1   | 0.003847276 | SLC29A1      | 7 | PTGDS_VEC |
| 2087 | 2.17E-06  | 0.493753507 | 1     | 0.911 | 0.047349227 | MT-ND4       | 7 | PTGDS_VEC |
| 2088 | 2.27E-07  | 0.493166111 | 0.612 | 0.311 | 0.004950933 | PICALM       | 7 | PTGDS_VEC |
| 2089 | 2.27E-16  | 0.478290193 | 0.347 | 0.056 | 4.94E-12    | WNT2         | 7 | PTGDS_VEC |
| 2090 | 8.99E-09  | 0.474558649 | 0.429 | 0.145 | 0.00019601  | ST3GAL1      | 7 | PTGDS_VEC |
| 2091 | 1.79E-06  | 0.470705938 | 0.531 | 0.263 | 0.039002067 | MRPL32       | 7 | PTGDS_VEC |
| 2092 | 7.17E-22  | 0.467402203 | 0.286 | 0.029 | 1.56E-17    | RDH10        | 7 | PTGDS_VEC |
| 2093 | 7.28E-07  | 0.455907014 | 0.878 | 0.723 | 0.015869965 | TGM2         | 7 | PTGDS_VEC |
| 2094 | 7.13E-27  | 0.455824263 | 0.265 | 0.019 | 1.56E-22    | KCNIP4       | 7 | PTGDS_VEC |
| 2095 | 7.50E-07  | 0.454188399 | 1     | 0.842 | 0.016347767 | NEAT1        | 7 | PTGDS_VEC |
| 2096 | 4.04E-07  | 0.454072054 | 0.98  | 0.885 | 0.008803749 | ENG          | 7 | PTGDS_VEC |
| 2097 | 9.70E-102 | 0.451348974 | 0.265 | 0     | 2.11E-97    | RP11-384F7.2 | 7 | PTGDS_VEC |
| 2098 | 1.50E-16  | 0.450538267 | 0.163 | 0.012 | 3.28E-12    | VCAN         | 7 | PTGDS_VEC |

|      |          |              |       |       |             |              |   |           |
|------|----------|--------------|-------|-------|-------------|--------------|---|-----------|
| 2099 | 1.44E-06 | 0.433865146  | 0.98  | 0.815 | 0.031333474 | IFITM1       | 7 | PTGDS_VEC |
| 2100 | 8.36E-08 | 0.43383422   | 0.449 | 0.165 | 0.00182208  | AEBP1        | 7 | PTGDS_VEC |
| 2101 | 2.44E-08 | 0.433319372  | 0.245 | 0.056 | 0.000532974 | PPP1R13L     | 7 | PTGDS_VEC |
| 2102 | 1.57E-06 | 0.432980678  | 0.245 | 0.068 | 0.034265041 | ITGA10       | 7 | PTGDS_VEC |
| 2103 | 1.40E-06 | 0.43197429   | 0.531 | 0.24  | 0.030604137 | ERRFI1       | 7 | PTGDS_VEC |
| 2104 | 5.47E-17 | 0.430984909  | 0.286 | 0.037 | 1.19E-12    | RASA4        | 7 | PTGDS_VEC |
| 2105 | 4.21E-27 | 0.424405785  | 0.143 | 0.004 | 9.18E-23    | EFEMP1       | 7 | PTGDS_VEC |
| 2106 | 2.41E-15 | 0.413982642  | 0.265 | 0.036 | 5.26E-11    | RND3         | 7 | PTGDS_VEC |
| 2107 | 9.27E-07 | 0.413446015  | 0.245 | 0.066 | 0.020223827 | ST8SIA6      | 7 | PTGDS_VEC |
| 2108 | 1.43E-07 | 0.411916195  | 1     | 0.906 | 0.003111725 | IGFBP7       | 7 | PTGDS_VEC |
| 2109 | 9.98E-08 | 0.410980401  | 0.673 | 0.331 | 0.002176218 | C2orf88      | 7 | PTGDS_VEC |
| 2110 | 9.28E-45 | 0.402194294  | 0.184 | 0.003 | 2.02E-40    | OMD          | 7 | PTGDS_VEC |
| 2111 | 9.85E-07 | 0.401888178  | 0.857 | 0.515 | 0.021478432 | ACTN1        | 7 | PTGDS_VEC |
| 2112 | 5.02E-11 | 0.397939342  | 0.224 | 0.036 | 1.09E-06    | CLDN11       | 7 | PTGDS_VEC |
| 2113 | 1.27E-07 | 0.396487891  | 0.327 | 0.099 | 0.002759376 | AMOTL2       | 7 | PTGDS_VEC |
| 2114 | 4.07E-12 | 0.395788289  | 0.204 | 0.027 | 8.88E-08    | RP11-138A9.1 | 7 | PTGDS_VEC |
| 2115 | 3.32E-07 | 0.391245098  | 0.347 | 0.111 | 0.007240327 | DLL1         | 7 | PTGDS_VEC |
| 2116 | 1.18E-06 | 0.383071347  | 1     | 0.896 | 0.025729838 | MT-ND1       | 7 | PTGDS_VEC |
| 2117 | 3.59E-15 | 0.380730896  | 0.184 | 0.017 | 7.83E-11    | PLA1A        | 7 | PTGDS_VEC |
| 2118 | 6.18E-16 | 0.379290433  | 0.347 | 0.056 | 1.35E-11    | CCDC69       | 7 | PTGDS_VEC |
| 2119 | 5.53E-07 | 0.376079928  | 0.224 | 0.055 | 0.012050861 | TLE1         | 7 | PTGDS_VEC |
| 2120 | 4.09E-08 | 0.375193146  | 0.429 | 0.147 | 0.000893009 | YAF2         | 7 | PTGDS_VEC |
| 2121 | 2.41E-07 | 0.366024704  | 0.327 | 0.098 | 0.005250618 | HTRA1        | 7 | PTGDS_VEC |
| 2122 | 1.65E-07 | 0.364161204  | 0.204 | 0.044 | 0.003605083 | KLHL21       | 7 | PTGDS_VEC |
| 2123 | 4.53E-08 | 0.36394072   | 0.204 | 0.04  | 0.000988456 | ANXA3        | 7 | PTGDS_VEC |
| 2124 | 8.52E-13 | 0.362086921  | 0.184 | 0.021 | 1.86E-08    | SYT15        | 7 | PTGDS_VEC |
| 2125 | 2.15E-07 | 0.361348958  | 0.204 | 0.044 | 0.004688616 | NAT8         | 7 | PTGDS_VEC |
| 2126 | 1.39E-07 | 0.358521605  | 0.388 | 0.128 | 0.003023599 | SIK2         | 7 | PTGDS_VEC |
| 2127 | 8.12E-09 | 0.344254666  | 0.184 | 0.031 | 0.000177126 | TPBG         | 7 | PTGDS_VEC |
| 2128 | 1.22E-14 | 0.323600287  | 0.143 | 0.01  | 2.65E-10    | COL3A1       | 7 | PTGDS_VEC |
| 2129 | 1.94E-06 | 0.322899804  | 0.98  | 0.956 | 0.042384142 | HLA-E        | 7 | PTGDS_VEC |
| 2130 | 2.78E-13 | 0.303459629  | 0.224 | 0.03  | 6.06E-09    | NEDD4L       | 7 | PTGDS_VEC |
| 2131 | 1.52E-06 | 0.299448709  | 0.184 | 0.04  | 0.033189564 | SGMS2        | 7 | PTGDS_VEC |
| 2132 | 1.62E-06 | 0.294486053  | 0.306 | 0.1   | 0.035229162 | NAA15        | 7 | PTGDS_VEC |
| 2133 | 4.16E-13 | 0.290154961  | 0.224 | 0.03  | 9.06E-09    | IRX3         | 7 | PTGDS_VEC |
| 2134 | 1.86E-06 | 0.28781613   | 0.143 | 0.027 | 0.040522479 | PEX11A       | 7 | PTGDS_VEC |
| 2135 | 3.99E-08 | 0.278920411  | 0.204 | 0.04  | 0.000869132 | EXOC3        | 7 | PTGDS_VEC |
| 2136 | 2.22E-16 | 0.278637221  | 0.163 | 0.012 | 4.84E-12    | SSPN         | 7 | PTGDS_VEC |
| 2137 | 3.36E-08 | 0.273061605  | 0.163 | 0.026 | 0.000733392 | ARHGEF10     | 7 | PTGDS_VEC |
| 2138 | 3.25E-15 | 0.270500727  | 0.102 | 0.005 | 7.09E-11    | SULT1C2      | 7 | PTGDS_VEC |
| 2139 | 1.60E-06 | 0.267909525  | 0.245 | 0.066 | 0.034900785 | CCDC151      | 7 | PTGDS_VEC |
| 2140 | 4.82E-13 | 0.266163833  | 0.122 | 0.009 | 1.05E-08    | NTRK2        | 7 | PTGDS_VEC |
| 2141 | 9.19E-48 | 0.264298413  | 0.122 | 0     | 2.00E-43    | LSAMP        | 7 | PTGDS_VEC |
| 2142 | 6.72E-13 | 0.257140635  | 0.224 | 0.03  | 1.47E-08    | CHST2        | 7 | PTGDS_VEC |
| 2143 | 1.92E-06 | -0.269037047 | 1     | 0.994 | 0.041773532 | RPS28        | 7 | PTGDS_VEC |
| 2144 | 2.40E-07 | -0.317872673 | 1     | 0.994 | 0.005223346 | RPL28        | 7 | PTGDS_VEC |
| 2145 | 2.44E-07 | -0.355083787 | 0.98  | 0.982 | 0.005323023 | RPS7         | 7 | PTGDS_VEC |
| 2146 | 1.04E-06 | -0.532114418 | 0.816 | 0.87  | 0.022578057 | IL33         | 7 | PTGDS_VEC |
| 2147 | 5.44E-07 | -0.654202102 | 0.735 | 0.805 | 0.011868245 | LDB2         | 7 | PTGDS_VEC |
| 2148 | 4.53E-09 | -0.657914908 | 0.878 | 0.908 | 9.88E-05    | PPIB         | 7 | PTGDS_VEC |
| 2149 | 1.13E-08 | -0.695177643 | 0.918 | 0.914 | 0.000246356 | ACTG1        | 7 | PTGDS_VEC |
| 2150 | 1.36E-07 | -0.753119727 | 0.755 | 0.839 | 0.002976384 | CALR         | 7 | PTGDS_VEC |
| 2151 | 2.08E-07 | -0.760785619 | 0.49  | 0.721 | 0.00453262  | TMEM123      | 7 | PTGDS_VEC |
| 2152 | 2.19E-11 | -0.781051156 | 0.837 | 0.919 | 4.78E-07    | GNG11        | 7 | PTGDS_VEC |
| 2153 | 5.96E-08 | -0.81654324  | 0.49  | 0.733 | 0.001299997 | CTSB         | 7 | PTGDS_VEC |
| 2154 | 3.77E-08 | -0.822728848 | 0.347 | 0.704 | 0.000821972 | MEF2C        | 7 | PTGDS_VEC |
| 2155 | 4.45E-09 | -0.847639223 | 0.347 | 0.697 | 9.71E-05    | ADGRF5       | 7 | PTGDS_VEC |
| 2156 | 2.88E-07 | -0.852347694 | 0.163 | 0.523 | 0.006275166 | EFNB2        | 7 | PTGDS_VEC |
| 2157 | 7.65E-07 | -0.873982086 | 0.551 | 0.695 | 0.016691881 | ADGRL4       | 7 | PTGDS_VEC |
| 2158 | 7.57E-12 | -0.912292581 | 0.959 | 0.932 | 1.65E-07    | CCL14        | 7 | PTGDS_VEC |
| 2159 | 1.16E-08 | -0.980030377 | 0.143 | 0.552 | 0.000252931 | EFNB1        | 7 | PTGDS_VEC |
| 2160 | 3.11E-08 | -1.108452631 | 0.102 | 0.491 | 0.000677316 | MEG3         | 7 | PTGDS_VEC |
| 2161 | 1.14E-07 | -1.112868468 | 0.816 | 0.884 | 0.002483159 | SEPP1        | 7 | PTGDS_VEC |
| 2162 | 4.70E-07 | -1.128294569 | 0.286 | 0.623 | 0.010257782 | CLEC1B       | 7 | PTGDS_VEC |
| 2163 | 1.63E-12 | -1.20105067  | 0.327 | 0.782 | 3.56E-08    | A2M          | 7 | PTGDS_VEC |
| 2164 | 1.45E-09 | -1.259592318 | 0.224 | 0.662 | 3.17E-05    | OIT3         | 7 | PTGDS_VEC |
| 2165 | 2.37E-13 | -1.293151302 | 0.633 | 0.824 | 5.17E-09    | SPARC        | 7 | PTGDS_VEC |
| 2166 | 2.00E-10 | -1.31366294  | 0.592 | 0.823 | 4.36E-06    | FCN3         | 7 | PTGDS_VEC |
| 2167 | 3.85E-08 | -1.326971677 | 0.449 | 0.698 | 0.000840367 | FCN2         | 7 | PTGDS_VEC |
| 2168 | 2.05E-06 | -1.384546029 | 0.265 | 0.562 | 0.044613885 | CD14         | 7 | PTGDS_VEC |

|      |          |              |       |       |          |        |   |           |
|------|----------|--------------|-------|-------|----------|--------|---|-----------|
| 2169 | 1.86E-09 | -1.472753718 | 0.633 | 0.766 | 4.07E-05 | LGMN   | 7 | PTGDS_VEC |
| 2170 | 2.69E-19 | -2.061114377 | 0.102 | 0.779 | 5.87E-15 | CLDN5  | 7 | PTGDS_VEC |
| 2171 | 4.02E-14 | -2.491502777 | 0.102 | 0.668 | 8.77E-10 | CLEC4G | 7 | PTGDS_VEC |

**Table 11: List of DEGs of endothelial cell clusters in reperfusion stage (PR versus EP)**

| List of differentially expressed genes of CSTL LSEC in reperfusion stage (PR versus EP) |          |              |       |       |           |
|-----------------------------------------------------------------------------------------|----------|--------------|-------|-------|-----------|
| gene                                                                                    | p_val    | avg_logFC    | pct.1 | pct.2 | p_val_adj |
| HSPD1                                                                                   | 2.74E-36 | 1.962726822  | 0.983 | 0.538 | 5.97E-32  |
| HSPE1                                                                                   | 3.43E-35 | 1.775331272  | 0.974 | 0.515 | 7.49E-31  |
| EMP1                                                                                    | 2.70E-34 | 1.693351743  | 0.906 | 0.22  | 5.89E-30  |
| TM4SF1                                                                                  | 1.54E-33 | 1.133219786  | 1     | 0.992 | 3.35E-29  |
| LITAF                                                                                   | 1.05E-31 | 1.37629882   | 0.983 | 0.47  | 2.29E-27  |
| HSP90AA1                                                                                | 1.27E-31 | 1.262562393  | 1     | 0.932 | 2.78E-27  |
| PNP                                                                                     | 1.41E-29 | 1.34006839   | 0.889 | 0.273 | 3.08E-25  |
| HES1                                                                                    | 1.97E-29 | -1.337649092 | 0.239 | 0.909 | 4.30E-25  |
| ID3                                                                                     | 7.27E-28 | -1.328064276 | 0.573 | 0.962 | 1.59E-23  |
| PLAUR                                                                                   | 4.02E-27 | 1.268989891  | 0.795 | 0.152 | 8.76E-23  |
| BAG3                                                                                    | 2.13E-26 | 1.370266721  | 0.915 | 0.364 | 4.64E-22  |
| HSPB1                                                                                   | 2.14E-26 | 1.435604091  | 0.991 | 0.886 | 4.66E-22  |
| AKAP12                                                                                  | 1.67E-25 | 0.961758866  | 1     | 0.985 | 3.64E-21  |
| MIR4435-2HG                                                                             | 2.83E-25 | 1.193280862  | 0.829 | 0.242 | 6.17E-21  |
| FOSL1                                                                                   | 5.97E-25 | 0.919575064  | 0.641 | 0.023 | 1.30E-20  |
| HSP90AB1                                                                                | 1.31E-24 | 0.85308268   | 1     | 0.939 | 2.85E-20  |
| PHLDA1                                                                                  | 1.62E-24 | 1.057124249  | 0.932 | 0.515 | 3.52E-20  |
| PMP22                                                                                   | 2.88E-24 | 1.165833499  | 0.957 | 0.606 | 6.28E-20  |
| ADAMTS9                                                                                 | 5.22E-24 | 1.06199865   | 0.684 | 0.061 | 1.14E-19  |
| DDX21                                                                                   | 1.84E-23 | 1.054318536  | 0.863 | 0.439 | 4.01E-19  |
| ZFP36L1                                                                                 | 4.84E-23 | -0.932942692 | 0.701 | 0.955 | 1.06E-18  |
| TIMP1                                                                                   | 5.06E-23 | 0.703872436  | 1     | 1     | 1.10E-18  |
| ADAMTS4                                                                                 | 5.75E-23 | 1.157588121  | 0.872 | 0.311 | 1.25E-18  |
| LMNA                                                                                    | 7.57E-23 | 1.045126745  | 0.889 | 0.402 | 1.65E-18  |
| S1PR1                                                                                   | 1.25E-22 | 0.879108252  | 0.966 | 0.689 | 2.72E-18  |
| HSPA5                                                                                   | 3.79E-22 | 1.431255166  | 0.991 | 0.879 | 8.27E-18  |
| LINC00152                                                                               | 9.04E-22 | 1.060410644  | 0.761 | 0.182 | 1.97E-17  |
| HSPH1                                                                                   | 1.01E-21 | 1.381338819  | 0.855 | 0.439 | 2.20E-17  |
| SAT1                                                                                    | 1.40E-21 | 0.839762364  | 1     | 0.977 | 3.06E-17  |
| MESDC1                                                                                  | 8.21E-21 | 0.933478537  | 0.718 | 0.167 | 1.79E-16  |
| MYADM                                                                                   | 1.27E-20 | 0.963686991  | 0.906 | 0.462 | 2.78E-16  |
| PDLIM3                                                                                  | 1.16E-19 | 0.922175329  | 0.726 | 0.189 | 2.52E-15  |
| SELK                                                                                    | 1.46E-19 | 1.044609572  | 0.923 | 0.576 | 3.17E-15  |
| PIM3                                                                                    | 2.50E-19 | -0.853919725 | 0.205 | 0.75  | 5.45E-15  |
| CNKSR3                                                                                  | 2.72E-19 | 0.845941476  | 0.778 | 0.242 | 5.93E-15  |
| HSPA1A                                                                                  | 4.86E-19 | 0.884574989  | 1     | 0.886 | 1.06E-14  |
| LDLR                                                                                    | 5.91E-19 | 0.89846384   | 0.735 | 0.22  | 1.29E-14  |
| B4GALT5                                                                                 | 8.33E-19 | 0.815841904  | 0.752 | 0.227 | 1.82E-14  |
| HSPA1B                                                                                  | 1.02E-18 | 1.0166313    | 0.966 | 0.78  | 2.22E-14  |
| PLIN2                                                                                   | 1.33E-18 | 0.853575233  | 0.974 | 0.773 | 2.91E-14  |
| THBD                                                                                    | 1.68E-18 | 0.993813772  | 0.915 | 0.523 | 3.66E-14  |
| NUAK1                                                                                   | 1.69E-18 | -0.780555274 | 0.214 | 0.75  | 3.69E-14  |
| MYC                                                                                     | 2.14E-18 | 0.938838678  | 0.949 | 0.667 | 4.66E-14  |
| SNHG15                                                                                  | 2.23E-18 | 0.814515589  | 0.624 | 0.106 | 4.87E-14  |
| EVA1C                                                                                   | 8.49E-18 | 0.854651785  | 0.778 | 0.273 | 1.85E-13  |
| DUSP6                                                                                   | 1.53E-17 | 0.885673874  | 0.974 | 0.72  | 3.34E-13  |
| CLIC1                                                                                   | 1.81E-17 | 0.55253955   | 0.983 | 0.955 | 3.94E-13  |
| PLPP3                                                                                   | 1.98E-17 | 0.605466685  | 1     | 0.977 | 4.32E-13  |
| ARID5A                                                                                  | 4.29E-17 | 0.71658987   | 0.556 | 0.076 | 9.35E-13  |
| PDLIM1                                                                                  | 4.44E-17 | 0.601283738  | 0.983 | 0.97  | 9.69E-13  |
| LPAR6                                                                                   | 7.73E-17 | -0.717598203 | 0.769 | 0.962 | 1.69E-12  |
| ATP13A3                                                                                 | 1.09E-16 | 0.752291566  | 0.598 | 0.106 | 2.39E-12  |
| TSC22D4                                                                                 | 1.15E-16 | -0.767382857 | 0.111 | 0.591 | 2.51E-12  |
| CYCS                                                                                    | 1.44E-16 | 0.750386377  | 0.769 | 0.326 | 3.14E-12  |
| MYL6                                                                                    | 1.89E-16 | 0.473675583  | 1     | 0.992 | 4.13E-12  |
| TSC22D3                                                                                 | 1.91E-16 | -0.80720399  | 0.65  | 0.886 | 4.15E-12  |
| TRIB1                                                                                   | 1.96E-16 | 0.757448283  | 0.803 | 0.28  | 4.27E-12  |
| ICAM1                                                                                   | 2.80E-16 | 1.135841798  | 0.94  | 0.742 | 6.11E-12  |
| MCAM                                                                                    | 3.13E-16 | 0.807694232  | 0.692 | 0.227 | 6.83E-12  |
| SDF2L1                                                                                  | 8.13E-16 | 0.911333778  | 0.786 | 0.348 | 1.77E-11  |
| KLF6                                                                                    | 9.53E-16 | 0.76558372   | 0.966 | 0.826 | 2.08E-11  |
| PTPN1                                                                                   | 1.25E-15 | 0.768029789  | 0.846 | 0.439 | 2.73E-11  |
| GPR4                                                                                    | 1.28E-15 | 0.709382841  | 0.59  | 0.121 | 2.79E-11  |
| CDC37                                                                                   | 2.95E-15 | 0.606488091  | 1     | 0.848 | 6.43E-11  |
| CD9                                                                                     | 3.32E-15 | 0.893949205  | 0.974 | 0.833 | 7.24E-11  |
| UGCG                                                                                    | 3.94E-15 | 0.780717135  | 0.932 | 0.682 | 8.60E-11  |
| MCL1                                                                                    | 6.01E-15 | 0.639908546  | 0.974 | 0.826 | 1.31E-10  |

|           |          |              |       |       |          |
|-----------|----------|--------------|-------|-------|----------|
| DDIT4     | 6.24E-15 | -0.903266506 | 0.632 | 0.924 | 1.36E-10 |
| CD59      | 6.67E-15 | 0.531264342  | 0.991 | 0.962 | 1.46E-10 |
| ZNF593    | 8.08E-15 | 0.711588064  | 0.547 | 0.098 | 1.76E-10 |
| IL32      | 8.20E-15 | 1.095380061  | 0.65  | 0.212 | 1.79E-10 |
| NOP16     | 1.02E-14 | 0.675060205  | 0.487 | 0.061 | 2.22E-10 |
| PVRL2     | 1.15E-14 | 0.596964843  | 0.94  | 0.795 | 2.52E-10 |
| HSPA8     | 1.18E-14 | 0.598463082  | 0.991 | 0.977 | 2.57E-10 |
| RIN2      | 1.20E-14 | 0.819708939  | 0.718 | 0.303 | 2.62E-10 |
| TNFRSF12A | 1.36E-14 | 0.684425228  | 0.376 | 0     | 2.98E-10 |
| SLC20A1   | 1.50E-14 | 0.808087577  | 0.624 | 0.182 | 3.28E-10 |
| SOX17     | 1.59E-14 | 0.952209445  | 0.769 | 0.379 | 3.48E-10 |
| HNRNPAB   | 2.68E-14 | 0.6487935    | 0.615 | 0.159 | 5.84E-10 |
| SPHK1     | 2.89E-14 | 0.661179063  | 0.41  | 0.023 | 6.31E-10 |
| MARCKS    | 3.17E-14 | 0.579646057  | 0.949 | 0.682 | 6.91E-10 |
| ACER3     | 3.53E-14 | 0.773411275  | 0.709 | 0.288 | 7.70E-10 |
| HLA-DRB5  | 4.04E-14 | 0.728985127  | 0.94  | 0.712 | 8.80E-10 |
| ZYX       | 4.25E-14 | 0.651822306  | 0.855 | 0.439 | 9.27E-10 |
| EFNA1     | 4.57E-14 | -0.709199307 | 0.598 | 0.909 | 9.96E-10 |
| SH3BGRL3  | 1.11E-13 | 0.578350047  | 0.949 | 0.902 | 2.42E-09 |
| SBNO2     | 1.48E-13 | 0.560899979  | 0.59  | 0.152 | 3.23E-09 |
| RELN      | 1.85E-13 | -0.650073313 | 0.778 | 0.985 | 4.03E-09 |
| EIF4A1    | 3.16E-13 | 0.601145441  | 0.88  | 0.53  | 6.89E-09 |
| RHOC      | 3.35E-13 | 0.516599602  | 0.966 | 0.879 | 7.31E-09 |
| STIP1     | 4.03E-13 | 0.54270188   | 0.564 | 0.129 | 8.78E-09 |
| GIMAP8    | 4.33E-13 | -0.641671185 | 0.239 | 0.674 | 9.45E-09 |
| BAZ1A     | 4.60E-13 | 0.686257455  | 0.667 | 0.227 | 1.00E-08 |
| EIF5A     | 5.54E-13 | 0.696102399  | 0.778 | 0.485 | 1.21E-08 |
| NME1      | 5.93E-13 | 0.494737333  | 0.41  | 0.038 | 1.29E-08 |
| BZW1      | 6.08E-13 | 0.61691669   | 0.829 | 0.545 | 1.33E-08 |
| CDC42EP2  | 6.73E-13 | 0.712957861  | 0.607 | 0.22  | 1.47E-08 |
| OAF       | 7.37E-13 | 0.474798341  | 0.333 | 0     | 1.61E-08 |
| NAMPT     | 7.73E-13 | 0.525398991  | 0.966 | 0.871 | 1.69E-08 |
| POMP      | 7.77E-13 | 0.551960506  | 0.966 | 0.848 | 1.69E-08 |
| SERPINB1  | 8.63E-13 | 0.79180883   | 0.957 | 0.78  | 1.88E-08 |
| DNASE1L3  | 1.47E-12 | -0.329746847 | 1     | 1     | 3.20E-08 |
| EHD4      | 1.48E-12 | 0.603827974  | 0.684 | 0.265 | 3.22E-08 |
| PDK4      | 2.19E-12 | -0.61775627  | 0.761 | 0.932 | 4.77E-08 |
| PODXL     | 2.21E-12 | 0.611557023  | 0.47  | 0.076 | 4.83E-08 |
| STARD4    | 2.23E-12 | 0.582198505  | 0.453 | 0.076 | 4.87E-08 |
| TNFRSF1A  | 2.74E-12 | 0.560759866  | 0.966 | 0.795 | 5.97E-08 |
| IGFBP4    | 2.76E-12 | -0.422063936 | 1     | 0.992 | 6.03E-08 |
| PLK3      | 2.83E-12 | 0.684941231  | 0.581 | 0.189 | 6.18E-08 |
| LRRC32    | 3.09E-12 | 0.708058532  | 0.632 | 0.258 | 6.74E-08 |
| SEPP1     | 3.13E-12 | -0.425593103 | 1     | 1     | 6.83E-08 |
| ENG       | 3.34E-12 | -0.482112733 | 1     | 1     | 7.28E-08 |
| RBM3      | 3.49E-12 | 0.540320828  | 0.932 | 0.833 | 7.61E-08 |
| HSPG2     | 3.50E-12 | -0.57197435  | 0.855 | 0.947 | 7.62E-08 |
| SOCS2     | 3.61E-12 | 0.626942262  | 0.88  | 0.598 | 7.88E-08 |
| TOMM5     | 3.80E-12 | 0.613309651  | 0.821 | 0.477 | 8.28E-08 |
| MT2A      | 4.35E-12 | 1.115533517  | 0.974 | 0.924 | 9.48E-08 |
| ADAMTS1   | 4.91E-12 | 0.819801175  | 0.838 | 0.477 | 1.07E-07 |
| VIMP      | 5.14E-12 | 0.673048227  | 0.829 | 0.568 | 1.12E-07 |
| INPP1     | 5.20E-12 | 0.609153065  | 0.803 | 0.515 | 1.13E-07 |
| JUNB      | 5.26E-12 | -0.610317691 | 0.957 | 0.992 | 1.15E-07 |
| PEA15     | 5.69E-12 | 0.623088996  | 0.735 | 0.348 | 1.24E-07 |
| CD4       | 5.70E-12 | -0.439234616 | 0.983 | 1     | 1.24E-07 |
| SPRY4     | 5.71E-12 | 0.647478056  | 0.726 | 0.318 | 1.24E-07 |
| KDM6B     | 5.77E-12 | 0.709475343  | 0.624 | 0.242 | 1.26E-07 |
| NOTCH4    | 7.29E-12 | -0.557008613 | 0.487 | 0.856 | 1.59E-07 |
| UPP1      | 7.84E-12 | 0.63153563   | 0.923 | 0.735 | 1.71E-07 |
| SDPR      | 8.15E-12 | -0.488036876 | 0.974 | 0.992 | 1.78E-07 |
| MAT2A     | 8.66E-12 | 0.636648168  | 0.675 | 0.288 | 1.89E-07 |
| CLEC4G    | 8.88E-12 | -0.287972513 | 1     | 1     | 1.94E-07 |
| F8        | 1.05E-11 | -0.513758892 | 0.88  | 0.992 | 2.29E-07 |
| STAB1     | 1.30E-11 | -0.561500556 | 0.966 | 1     | 2.83E-07 |
| UBE2D3    | 1.41E-11 | 0.477750227  | 0.983 | 0.909 | 3.07E-07 |
| TOP1      | 1.78E-11 | 0.610301503  | 0.803 | 0.515 | 3.87E-07 |
| RHOB      | 1.89E-11 | -0.710447343 | 0.803 | 0.955 | 4.12E-07 |
| OIT3      | 2.24E-11 | -0.391269821 | 1     | 1     | 4.88E-07 |
| DNAJB6    | 2.63E-11 | 0.720478291  | 0.821 | 0.545 | 5.73E-07 |



|                |          |              |       |       |             |
|----------------|----------|--------------|-------|-------|-------------|
| CTSD           | 2.81E-11 | -0.382317978 | 1     | 1     | 6.14E-07    |
| INSIG1         | 2.87E-11 | 0.773104537  | 0.667 | 0.333 | 6.27E-07    |
| GIMAP1         | 3.56E-11 | -0.589587143 | 0.444 | 0.78  | 7.75E-07    |
| TFPI2          | 4.63E-11 | 0.877028502  | 0.906 | 0.811 | 1.01E-06    |
| SLC44A2        | 5.28E-11 | -0.523070984 | 0.547 | 0.871 | 1.15E-06    |
| HYAL2          | 5.75E-11 | 0.630044557  | 0.957 | 0.848 | 1.25E-06    |
| NOP58          | 6.81E-11 | 0.592147157  | 0.675 | 0.318 | 1.49E-06    |
| IFITM3         | 7.53E-11 | 0.3427865    | 1     | 1     | 1.64E-06    |
| ARL4D          | 8.08E-11 | -0.525753449 | 0.085 | 0.447 | 1.76E-06    |
| ACKR3          | 1.10E-10 | 0.644667123  | 0.496 | 0.121 | 2.39E-06    |
| RAP1B          | 1.11E-10 | 0.532366336  | 0.897 | 0.788 | 2.41E-06    |
| ANGPTL4        | 1.15E-10 | 0.874962303  | 0.607 | 0.235 | 2.51E-06    |
| NR2F2          | 1.15E-10 | -0.615418235 | 0.573 | 0.841 | 2.51E-06    |
| NOLC1          | 1.16E-10 | 0.583056387  | 0.675 | 0.318 | 2.52E-06    |
| PDLIM5         | 1.19E-10 | 0.742503784  | 0.701 | 0.409 | 2.59E-06    |
| RTEL1-TNFRSF6B | 1.24E-10 | 0.72874358   | 0.325 | 0.023 | 2.71E-06    |
| ARPC5L         | 1.29E-10 | 0.528935755  | 0.778 | 0.424 | 2.82E-06    |
| RPS29          | 1.36E-10 | 0.369133877  | 0.991 | 1     | 2.98E-06    |
| XBP1           | 1.63E-10 | 0.511693348  | 0.889 | 0.591 | 3.56E-06    |
| FOSL2          | 1.73E-10 | 0.572966051  | 0.641 | 0.273 | 3.77E-06    |
| BCL2L1         | 1.81E-10 | 0.588796244  | 0.59  | 0.22  | 3.94E-06    |
| ID2            | 2.07E-10 | -0.623576659 | 0.581 | 0.818 | 4.52E-06    |
| TMSB10         | 2.14E-10 | 0.371678245  | 1     | 1     | 4.66E-06    |
| PHLDB1         | 2.42E-10 | 0.436593821  | 0.41  | 0.068 | 5.29E-06    |
| UAP1           | 2.87E-10 | 0.478251485  | 0.436 | 0.106 | 6.25E-06    |
| YWHAG          | 3.54E-10 | 0.51236489   | 0.564 | 0.205 | 7.72E-06    |
| HLA-DRB1       | 4.58E-10 | 0.472817683  | 1     | 0.97  | 9.98E-06    |
| TEAD4          | 4.97E-10 | 0.596133249  | 0.632 | 0.295 | 1.08E-05    |
| SRSF5          | 5.12E-10 | 0.557277883  | 0.94  | 0.795 | 1.12E-05    |
| SRGN           | 5.14E-10 | 0.585956698  | 0.983 | 0.871 | 1.12E-05    |
| PELO           | 5.31E-10 | 0.568459923  | 0.744 | 0.409 | 1.16E-05    |
| SOD2           | 5.43E-10 | 0.85299783   | 0.821 | 0.553 | 1.18E-05    |
| RAN            | 6.00E-10 | 0.630466236  | 0.761 | 0.598 | 1.31E-05    |
| MT1M           | 6.08E-10 | 0.696171747  | 0.35  | 0.045 | 1.33E-05    |
| BCL6B          | 6.09E-10 | 0.578451395  | 0.521 | 0.167 | 1.33E-05    |
| TMEM37         | 7.04E-10 | -0.569157747 | 0.598 | 0.826 | 1.54E-05    |
| RASSF1         | 7.06E-10 | 0.519330987  | 0.607 | 0.258 | 1.54E-05    |
| ZFP36          | 7.24E-10 | -0.564070237 | 0.957 | 1     | 1.58E-05    |
| CCT6A          | 8.04E-10 | 0.4745195    | 0.726 | 0.371 | 1.75E-05    |
| NCL            | 9.62E-10 | 0.559215814  | 0.889 | 0.75  | 2.10E-05    |
| IL1RL1         | 9.63E-10 | 0.989346274  | 0.299 | 0.023 | 2.10E-05    |
| H3F3B          | 1.03E-09 | 0.409440505  | 1     | 0.977 | 2.24E-05    |
| PRCP           | 1.19E-09 | -0.398929205 | 0.966 | 0.992 | 2.60E-05    |
| DHCR24         | 1.25E-09 | -0.49675896  | 0.393 | 0.742 | 2.73E-05    |
| TIMM17A        | 1.39E-09 | 0.52656621   | 0.547 | 0.197 | 3.04E-05    |
| WDR43          | 1.41E-09 | 0.50152974   | 0.376 | 0.068 | 3.07E-05    |
| TUBA1C         | 1.83E-09 | 0.592590213  | 0.675 | 0.333 | 4.00E-05    |
| EIF3I          | 1.86E-09 | 0.443357327  | 0.872 | 0.636 | 4.06E-05    |
| YBX1           | 1.97E-09 | 0.411530281  | 0.957 | 0.886 | 4.30E-05    |
| STAB2          | 2.12E-09 | -0.519251563 | 0.829 | 0.977 | 4.62E-05    |
| DNAJB11        | 2.14E-09 | 0.856375666  | 0.692 | 0.455 | 4.66E-05    |
| AHSA1          | 2.17E-09 | 0.537991816  | 0.504 | 0.167 | 4.74E-05    |
| MT-ATP6        | 2.32E-09 | -0.390936373 | 1     | 1     | 5.06E-05    |
| EGR1           | 2.50E-09 | -0.646176378 | 0.718 | 0.879 | 5.46E-05    |
| STX12          | 2.56E-09 | 0.508591795  | 0.675 | 0.303 | 5.59E-05    |
| PLSCR1         | 2.67E-09 | 0.420228843  | 0.915 | 0.773 | 5.82E-05    |
| ILF2           | 2.71E-09 | 0.513521232  | 0.675 | 0.371 | 5.91E-05    |
| MALL           | 3.04E-09 | 0.597963804  | 0.35  | 0.061 | 6.64E-05    |
| STX11          | 3.05E-09 | 0.439944069  | 0.342 | 0.053 | 6.65E-05    |
| CDKN1B         | 3.11E-09 | -0.531004745 | 0.35  | 0.652 | 6.77E-05    |
| GIMAP7         | 3.30E-09 | -0.563241233 | 0.359 | 0.697 | 7.21E-05    |
| MT1X           | 3.86E-09 | 0.803629421  | 0.684 | 0.333 | 8.42E-05    |
| SH3TC1         | 3.95E-09 | -0.58965162  | 0.368 | 0.682 | 8.62E-05    |
| ARHGAP23       | 4.08E-09 | 0.468331873  | 0.419 | 0.106 | 8.89E-05    |
| MAF            | 4.24E-09 | -0.457732937 | 0.855 | 0.962 | 9.25E-05    |
| SNX5           | 4.39E-09 | -0.447134842 | 0.846 | 0.955 | 9.57E-05    |
| INSR           | 4.60E-09 | 0.544040619  | 0.65  | 0.326 | 0.000100241 |
| SFPQ           | 4.62E-09 | 0.49540753   | 0.88  | 0.606 | 0.000100811 |
| SLC12A7        | 5.31E-09 | 0.605842466  | 0.59  | 0.258 | 0.000115843 |
| SNRPB          | 5.68E-09 | 0.452531595  | 0.838 | 0.545 | 0.000123798 |

|             |          |              |       |       |             |
|-------------|----------|--------------|-------|-------|-------------|
| CHKA        | 5.80E-09 | -0.404725046 | 0.145 | 0.5   | 0.000126504 |
| SOX18       | 5.92E-09 | -0.503148572 | 0.154 | 0.47  | 0.000129128 |
| SLC9A3R2    | 6.02E-09 | 0.793567795  | 0.744 | 0.47  | 0.000131278 |
| ID1         | 6.19E-09 | -0.501293555 | 0.872 | 0.955 | 0.000134984 |
| FAM102A     | 6.66E-09 | -0.541344436 | 0.402 | 0.705 | 0.000145313 |
| BLCAP       | 6.94E-09 | -0.480102042 | 0.41  | 0.712 | 0.000151454 |
| ENO1        | 6.95E-09 | 0.46688251   | 0.821 | 0.576 | 0.000151621 |
| DDIT3       | 7.53E-09 | -0.604492881 | 0.376 | 0.644 | 0.000164127 |
| RAMP3       | 8.48E-09 | -0.359245353 | 1     | 1     | 0.000184869 |
| IQCJ-SCHIP1 | 8.67E-09 | 0.371668671  | 0.282 | 0.023 | 0.000188968 |
| PHC2        | 8.74E-09 | 0.405280854  | 0.496 | 0.152 | 0.000190663 |
| PSAP        | 8.75E-09 | -0.31796334  | 0.991 | 1     | 0.000190748 |
| INHBB       | 1.01E-08 | 0.455979337  | 0.333 | 0.053 | 0.000220547 |
| DDX5        | 1.09E-08 | 0.38246914   | 0.991 | 0.955 | 0.00023846  |
| AKAP2       | 1.11E-08 | 0.463310199  | 0.59  | 0.242 | 0.000241608 |
| SNRPD1      | 1.15E-08 | 0.481424564  | 0.624 | 0.326 | 0.000250326 |
| GRN         | 1.20E-08 | -0.333411861 | 0.974 | 0.977 | 0.000261789 |
| MT-CYB      | 1.22E-08 | -0.339366978 | 1     | 1     | 0.000265941 |
| RAB20       | 1.32E-08 | -0.535658086 | 0.444 | 0.727 | 0.000287573 |
| VCAM1       | 1.33E-08 | 0.724319215  | 0.444 | 0.136 | 0.000288965 |
| AP2M1       | 1.36E-08 | -0.401035546 | 0.786 | 0.932 | 0.000296075 |
| GIMAP5      | 1.40E-08 | -0.47692217  | 0.538 | 0.826 | 0.000304308 |
| MTSS1       | 1.43E-08 | 0.571532806  | 0.684 | 0.386 | 0.000312253 |
| CD151       | 1.51E-08 | -0.398467545 | 0.906 | 0.939 | 0.000329472 |
| GIMAP4      | 1.55E-08 | -0.484483874 | 0.641 | 0.871 | 0.000339113 |
| TNIP2       | 1.57E-08 | 0.511689222  | 0.504 | 0.189 | 0.000341955 |
| NOS3        | 1.60E-08 | 0.561846736  | 0.59  | 0.265 | 0.000348072 |
| CIRBP       | 1.61E-08 | -0.365585215 | 0.897 | 0.955 | 0.000350786 |
| STOM        | 1.68E-08 | 0.392908607  | 0.983 | 0.947 | 0.000365579 |
| WARS        | 1.72E-08 | 0.528803476  | 0.812 | 0.561 | 0.000375461 |
| SLCO4A1     | 1.80E-08 | 0.516917531  | 0.761 | 0.47  | 0.00039357  |
| SSH1        | 2.00E-08 | 0.523147518  | 0.479 | 0.167 | 0.000436246 |
| BRIX1       | 2.13E-08 | 0.353960269  | 0.308 | 0.045 | 0.000463619 |
| CREM        | 2.14E-08 | 0.599515251  | 0.487 | 0.174 | 0.000467597 |
| PPRC1       | 2.18E-08 | 0.42246923   | 0.359 | 0.076 | 0.000476454 |
| IVNS1ABP    | 2.48E-08 | 0.481222589  | 0.718 | 0.424 | 0.000541402 |
| PNO1        | 2.71E-08 | 0.354137125  | 0.333 | 0.053 | 0.000589938 |
| PGK1        | 2.91E-08 | 0.489517103  | 0.855 | 0.583 | 0.000634827 |
| SERPINB9    | 2.95E-08 | 0.512069168  | 0.658 | 0.364 | 0.000642306 |
| DLC1        | 3.21E-08 | 0.456224524  | 0.983 | 0.886 | 0.000700359 |
| GRWD1       | 3.38E-08 | 0.268793519  | 0.231 | 0.008 | 0.000737636 |
| GRPEL1      | 3.38E-08 | 0.453127945  | 0.47  | 0.152 | 0.00073803  |
| LIMK2       | 3.76E-08 | 0.535202715  | 0.504 | 0.197 | 0.000820372 |
| DUSP1       | 3.77E-08 | -0.394192686 | 0.991 | 0.985 | 0.000822169 |
| EIF4A2      | 3.77E-08 | -0.474585861 | 0.624 | 0.879 | 0.000823009 |
| SPARC       | 3.85E-08 | -0.33756764  | 0.974 | 1     | 0.000838769 |
| PNPLA8      | 4.11E-08 | 0.488566414  | 0.641 | 0.341 | 0.000895556 |
| TUBB6       | 4.14E-08 | 0.425733495  | 0.615 | 0.273 | 0.000903331 |
| GABARAP     | 4.25E-08 | -0.316800225 | 0.974 | 0.985 | 0.000926704 |
| DEFA3       | 4.29E-08 | -0.401905974 | 0.068 | 0.356 | 0.000936331 |
| KPNA4       | 4.50E-08 | 0.445795407  | 0.47  | 0.167 | 0.000981178 |
| SNRPG       | 4.53E-08 | 0.430093982  | 0.786 | 0.462 | 0.000986875 |
| BACH1       | 4.64E-08 | 0.515975102  | 0.564 | 0.265 | 0.001012905 |
| MIR222HG    | 4.82E-08 | 0.430996856  | 0.359 | 0.076 | 0.001051659 |
| MTHFD2      | 4.90E-08 | 0.438881006  | 0.376 | 0.098 | 0.001068492 |
| GJA1        | 4.98E-08 | 0.375389323  | 0.205 | 0     | 0.001086205 |
| DOT1L       | 5.15E-08 | 0.332202507  | 0.239 | 0.015 | 0.001123903 |
| AC017002.2  | 5.37E-08 | 0.460088072  | 0.436 | 0.121 | 0.001170285 |
| GJA4        | 5.37E-08 | 0.885451404  | 0.667 | 0.379 | 0.001171788 |
| NUDC        | 6.59E-08 | 0.443438015  | 0.692 | 0.417 | 0.001436909 |
| HSPA9       | 7.04E-08 | 0.497118828  | 0.53  | 0.212 | 0.001534779 |
| SLC40A1     | 7.17E-08 | -0.40458209  | 0.863 | 0.955 | 0.001564191 |
| PISD        | 7.49E-08 | 0.33078947   | 0.291 | 0.045 | 0.001632927 |
| CXCL8       | 7.58E-08 | 0.801656893  | 0.444 | 0.159 | 0.001652895 |
| LUCAT1      | 7.97E-08 | 0.409705059  | 0.248 | 0.023 | 0.001737614 |
| C7          | 7.98E-08 | -0.536095536 | 0.701 | 0.879 | 0.001741122 |
| DNMBP       | 8.66E-08 | 0.446137783  | 0.479 | 0.174 | 0.001889294 |
| SMAD6       | 8.77E-08 | -0.448431484 | 0.06  | 0.326 | 0.001912529 |
| TCEB1       | 9.31E-08 | 0.464232697  | 0.88  | 0.712 | 0.002030701 |
| TMEM51      | 1.21E-07 | 0.362856011  | 0.325 | 0.061 | 0.002649334 |

|           |          |              |       |       |             |
|-----------|----------|--------------|-------|-------|-------------|
| NDRG1     | 1.27E-07 | 0.495801508  | 0.496 | 0.182 | 0.002761718 |
| PML       | 1.30E-07 | -0.412264931 | 0.197 | 0.508 | 0.00282478  |
| MEIS2     | 1.30E-07 | -0.432655251 | 0.419 | 0.75  | 0.002840351 |
| PTGES3    | 1.42E-07 | 0.461917576  | 0.906 | 0.856 | 0.003097305 |
| SF1       | 1.45E-07 | 0.458769408  | 0.863 | 0.705 | 0.003172424 |
| GNL3      | 1.56E-07 | 0.400748407  | 0.359 | 0.098 | 0.00340432  |
| TSSC4     | 1.58E-07 | 0.4547504    | 0.462 | 0.167 | 0.003446415 |
| RASD1     | 1.59E-07 | 1.022117776  | 0.778 | 0.568 | 0.003475746 |
| DNAJA4    | 1.71E-07 | 0.379917607  | 0.308 | 0.061 | 0.003735124 |
| CEBPZ     | 1.81E-07 | 0.411995631  | 0.624 | 0.311 | 0.003954014 |
| PFDN2     | 1.99E-07 | 0.527831768  | 0.735 | 0.508 | 0.004339293 |
| TMEM140   | 2.07E-07 | -0.487086104 | 0.333 | 0.598 | 0.00452359  |
| FLT1      | 2.16E-07 | 0.426432325  | 0.966 | 0.879 | 0.004703187 |
| SLC4A7    | 2.30E-07 | 0.340244099  | 0.222 | 0.015 | 0.005016819 |
| ANKRD28   | 2.31E-07 | 0.399213218  | 0.359 | 0.083 | 0.005036116 |
| NFKB2     | 2.39E-07 | 0.441542415  | 0.35  | 0.091 | 0.005204808 |
| ACTB      | 2.42E-07 | 0.336543973  | 1     | 1     | 0.005280334 |
| RELB      | 2.45E-07 | 0.428645607  | 0.402 | 0.129 | 0.005350639 |
| RBM17     | 2.50E-07 | 0.469273294  | 0.65  | 0.402 | 0.005453317 |
| CLEC4M    | 2.62E-07 | -0.336713864 | 1     | 0.992 | 0.00572004  |
| RCN1      | 2.69E-07 | 0.407872897  | 0.718 | 0.447 | 0.005866993 |
| ARID5B    | 2.81E-07 | 0.434463206  | 0.487 | 0.189 | 0.006121348 |
| RHEB      | 2.94E-07 | 0.396167347  | 0.726 | 0.455 | 0.006404291 |
| PIK3C2A   | 3.19E-07 | 0.437784061  | 0.752 | 0.485 | 0.006963128 |
| AQP3      | 3.38E-07 | 0.574199794  | 0.496 | 0.242 | 0.007361539 |
| C10orf10  | 3.43E-07 | -0.444452846 | 0.077 | 0.348 | 0.007474145 |
| NIP7      | 3.59E-07 | 0.380850633  | 0.368 | 0.106 | 0.007825965 |
| PIK3IP1   | 3.70E-07 | -0.423921742 | 0.145 | 0.417 | 0.00806063  |
| NRROS     | 3.77E-07 | -0.355408052 | 0.179 | 0.485 | 0.008217101 |
| NFKB1     | 3.77E-07 | 0.415237101  | 0.316 | 0.068 | 0.008219182 |
| RUNX1T1   | 3.79E-07 | -0.353663543 | 0.043 | 0.288 | 0.008264641 |
| ETF1      | 3.93E-07 | 0.450250805  | 0.581 | 0.265 | 0.008559695 |
| LIPG      | 4.29E-07 | 0.40375795   | 0.256 | 0.038 | 0.009353891 |
| RSL1D1    | 4.83E-07 | 0.419082297  | 0.632 | 0.341 | 0.010524973 |
| PNPLA2    | 5.15E-07 | -0.372941886 | 0.846 | 0.947 | 0.011222563 |
| VMP1      | 5.17E-07 | 0.402289546  | 0.684 | 0.379 | 0.011280113 |
| GIMAP2    | 5.24E-07 | -0.452512252 | 0.274 | 0.553 | 0.011424772 |
| DNAJA1    | 5.37E-07 | 0.426229002  | 0.923 | 0.795 | 0.011710915 |
| HMOX2     | 5.40E-07 | 0.433870457  | 0.607 | 0.348 | 0.011766095 |
| PA2G4     | 5.85E-07 | 0.463527782  | 0.692 | 0.447 | 0.012755791 |
| SMTN      | 6.15E-07 | -0.485092649 | 0.709 | 0.864 | 0.013418938 |
| SLC25A37  | 6.30E-07 | 0.447949327  | 0.718 | 0.5   | 0.013749943 |
| ZFAND2A   | 6.50E-07 | 0.702910252  | 0.521 | 0.25  | 0.014182518 |
| KRBOX4    | 7.28E-07 | -0.338691222 | 0.085 | 0.341 | 0.015870636 |
| ITPR1     | 7.40E-07 | 0.421882321  | 0.521 | 0.242 | 0.016142014 |
| MIR22HG   | 7.45E-07 | 0.411437916  | 0.573 | 0.273 | 0.01624725  |
| NPR1      | 7.53E-07 | -0.388406758 | 0.564 | 0.841 | 0.016430501 |
| CHIC2     | 7.76E-07 | 0.499289093  | 0.778 | 0.545 | 0.016926105 |
| HBB       | 7.87E-07 | -0.509075816 | 0.128 | 0.402 | 0.017155493 |
| G0S2      | 7.99E-07 | 0.383429038  | 0.171 | 0     | 0.017418785 |
| HES4      | 7.99E-07 | 0.353046643  | 0.171 | 0     | 0.017418785 |
| GSPT1     | 8.45E-07 | 0.433886952  | 0.419 | 0.152 | 0.018431797 |
| PDIA6     | 9.84E-07 | 0.30245949   | 0.991 | 0.985 | 0.021455671 |
| EMD       | 1.00E-06 | 0.421109338  | 0.632 | 0.348 | 0.021822026 |
| CTNNB1    | 1.01E-06 | 0.441140311  | 0.744 | 0.477 | 0.021925882 |
| R3HDM4    | 1.07E-06 | 0.396017214  | 0.402 | 0.152 | 0.02328753  |
| MAP2K3    | 1.12E-06 | 0.448070754  | 0.479 | 0.205 | 0.024418914 |
| TACC1     | 1.16E-06 | -0.441904484 | 0.684 | 0.879 | 0.025352904 |
| ZNF765    | 1.17E-06 | -0.432686654 | 0.256 | 0.538 | 0.025414542 |
| SERPINB8  | 1.20E-06 | 0.359097767  | 0.359 | 0.114 | 0.026121368 |
| BCL3      | 1.26E-06 | 0.394874187  | 0.462 | 0.182 | 0.027396353 |
| TNFRSF10B | 1.26E-06 | 0.44346804   | 0.547 | 0.295 | 0.027519205 |
| LUZP1     | 1.27E-06 | 0.440934549  | 0.53  | 0.25  | 0.027683646 |
| PAPOLA    | 1.31E-06 | 0.369644996  | 0.675 | 0.439 | 0.028580822 |
| RHPN2     | 1.32E-06 | -0.28195292  | 0.026 | 0.235 | 0.028799963 |
| GRAP      | 1.34E-06 | -0.395831059 | 0.179 | 0.455 | 0.02915204  |
| NXT1      | 1.52E-06 | 0.315027023  | 0.598 | 0.295 | 0.033256383 |
| FOXN2     | 1.54E-06 | -0.335998809 | 0.068 | 0.311 | 0.033692162 |
| FAM110B   | 1.57E-06 | -0.360635925 | 0.068 | 0.303 | 0.034169417 |
| LPP       | 1.61E-06 | -0.415889822 | 0.308 | 0.598 | 0.035122919 |

|             |          |              |       |       |             |
|-------------|----------|--------------|-------|-------|-------------|
| MSN         | 1.62E-06 | 0.402934858  | 0.718 | 0.508 | 0.035368084 |
| RP11-7F17.3 | 1.63E-06 | -0.449083628 | 0.145 | 0.409 | 0.035616744 |
| CLK1        | 1.64E-06 | -0.381080388 | 0.479 | 0.735 | 0.035731132 |
| PCGF2       | 1.71E-06 | 0.382086584  | 0.65  | 0.402 | 0.037219    |
| MAT2B       | 1.73E-06 | -0.397215459 | 0.231 | 0.515 | 0.037673099 |
| CCT2        | 1.98E-06 | 0.492447907  | 0.624 | 0.364 | 0.04319996  |
| HNRNPU      | 1.99E-06 | 0.498670361  | 0.829 | 0.598 | 0.043463537 |
| FGL2        | 2.05E-06 | 0.38196518   | 0.299 | 0.068 | 0.044778632 |
| MT-ND4L     | 2.15E-06 | -0.27187037  | 1     | 0.992 | 0.046880006 |
| IL16        | 2.15E-06 | -0.27886817  | 0.034 | 0.25  | 0.046977254 |
| MANF        | 2.18E-06 | 0.577750162  | 0.701 | 0.508 | 0.04751416  |
| ETS2        | 2.26E-06 | 0.361726997  | 0.923 | 0.811 | 0.049212012 |

List of differentially expressed genes of BGN LSEC in reperfusion stage (PR versus EP)

| gene        | p val    | avg logFC    | pct.1 | pct.2 | p val adj |
|-------------|----------|--------------|-------|-------|-----------|
| HSPD1       | 2.34E-31 | 2.126263209  | 0.99  | 0.412 | 5.11E-27  |
| HSPB1       | 1.45E-28 | 1.746214273  | 1     | 0.941 | 3.15E-24  |
| EMP1        | 1.71E-28 | 1.677738856  | 0.99  | 0.5   | 3.72E-24  |
| HSPE1       | 4.92E-27 | 2.017667681  | 0.96  | 0.461 | 1.07E-22  |
| LITAF       | 8.06E-27 | 1.472150682  | 0.96  | 0.5   | 1.76E-22  |
| PLAUR       | 2.51E-26 | 1.590017362  | 0.85  | 0.118 | 5.47E-22  |
| BAG3        | 2.88E-26 | 1.620542621  | 0.97  | 0.392 | 6.28E-22  |
| HSP90AA1    | 6.40E-26 | 1.407999724  | 0.98  | 0.912 | 1.40E-21  |
| TM4SF1      | 1.86E-25 | 1.020621005  | 1     | 0.99  | 4.05E-21  |
| HSPH1       | 3.47E-25 | 1.796354172  | 0.89  | 0.284 | 7.57E-21  |
| ADAMTS9     | 4.90E-25 | 1.363198481  | 0.88  | 0.157 | 1.07E-20  |
| PNP         | 8.23E-25 | 1.433512386  | 0.93  | 0.324 | 1.80E-20  |
| HSPA1A      | 2.56E-24 | 1.281501118  | 1     | 0.912 | 5.58E-20  |
| THBD        | 9.16E-23 | 1.334623325  | 0.97  | 0.51  | 2.00E-18  |
| CD59        | 4.67E-22 | 0.81916446   | 1     | 0.912 | 1.02E-17  |
| LMNA        | 1.16E-21 | 1.300328258  | 0.93  | 0.529 | 2.53E-17  |
| MIR4435-2HG | 1.92E-21 | 1.47579377   | 0.83  | 0.225 | 4.19E-17  |
| ID3         | 3.35E-21 | -1.19744959  | 0.63  | 0.961 | 7.31E-17  |
| AKAP12      | 4.30E-21 | 1.028837459  | 0.99  | 0.951 | 9.38E-17  |
| FOSL1       | 5.23E-21 | 1.23025233   | 0.7   | 0.049 | 1.14E-16  |
| TNFRSF12A   | 1.77E-20 | 1.092258714  | 0.63  | 0.01  | 3.85E-16  |
| HSPA1B      | 1.83E-20 | 1.250403615  | 0.96  | 0.735 | 3.99E-16  |
| HSP90AB1    | 1.96E-20 | 0.960425115  | 1     | 0.98  | 4.26E-16  |
| DDX21       | 3.84E-20 | 1.117194523  | 0.87  | 0.353 | 8.38E-16  |
| SOX17       | 1.20E-19 | 1.220801606  | 0.92  | 0.461 | 2.63E-15  |
| CDC42EP2    | 1.46E-19 | 0.995180281  | 0.75  | 0.098 | 3.18E-15  |
| HES1        | 9.37E-19 | -1.320994    | 0.35  | 0.863 | 2.04E-14  |
| SLC40A1     | 2.69E-18 | -0.925844811 | 0.48  | 0.912 | 5.87E-14  |
| LINC00152   | 2.90E-18 | 1.243842385  | 0.78  | 0.245 | 6.33E-14  |
| SH3BGR13    | 6.44E-18 | 0.878202754  | 0.97  | 0.824 | 1.40E-13  |
| MAT2A       | 7.23E-18 | 1.033164302  | 0.83  | 0.304 | 1.58E-13  |
| INSIG1      | 1.04E-16 | 1.218077987  | 0.78  | 0.265 | 2.26E-12  |
| TSC22D3     | 1.06E-16 | -0.923775377 | 0.64  | 0.951 | 2.31E-12  |
| MYADM       | 1.11E-16 | 1.150439698  | 0.89  | 0.598 | 2.43E-12  |
| UPP1        | 2.40E-16 | 0.955846991  | 0.9   | 0.52  | 5.24E-12  |
| ZFP36L1     | 3.42E-16 | -0.787489576 | 0.75  | 0.961 | 7.47E-12  |
| SAT1        | 4.61E-16 | 0.885945213  | 1     | 0.98  | 1.01E-11  |
| SELK        | 4.70E-16 | 0.987662169  | 0.89  | 0.549 | 1.02E-11  |
| POMP        | 6.79E-16 | 0.714861644  | 0.97  | 0.804 | 1.48E-11  |
| PMP22       | 1.08E-15 | 1.131426062  | 0.85  | 0.441 | 2.36E-11  |
| SRSF5       | 3.63E-15 | 0.678772299  | 0.98  | 0.794 | 7.92E-11  |
| CD9         | 1.94E-14 | 0.915788936  | 0.99  | 0.873 | 4.24E-10  |
| ACKR3       | 2.00E-14 | 0.947991119  | 0.57  | 0.088 | 4.37E-10  |
| DDIT4       | 2.11E-14 | -0.998626707 | 0.75  | 0.971 | 4.59E-10  |
| RHOB        | 2.14E-14 | -1.064252663 | 0.8   | 0.931 | 4.68E-10  |
| PTPN1       | 2.30E-14 | 1.040757561  | 0.74  | 0.314 | 5.02E-10  |
| RBM3        | 2.49E-14 | 0.805144822  | 0.94  | 0.696 | 5.43E-10  |
| HES4        | 3.05E-14 | 1.05226502   | 0.5   | 0.029 | 6.64E-10  |
| KLF6        | 4.33E-14 | 0.87261561   | 0.97  | 0.892 | 9.44E-10  |
| HSPA5       | 5.15E-14 | 1.141695845  | 0.97  | 0.853 | 1.12E-09  |
| HYAL2       | 5.54E-14 | 0.97254108   | 0.95  | 0.775 | 1.21E-09  |
| LDLR        | 6.49E-14 | 0.828778607  | 0.75  | 0.275 | 1.41E-09  |

|          |          |              |      |       |          |
|----------|----------|--------------|------|-------|----------|
| MYC      | 7.58E-14 | 0.879072142  | 0.97 | 0.667 | 1.65E-09 |
| RHOC     | 9.09E-14 | 0.641102735  | 0.97 | 0.853 | 1.98E-09 |
| TMSB10   | 1.35E-13 | 0.481349725  | 1    | 0.99  | 2.94E-09 |
| TRIB1    | 1.48E-13 | 0.902329238  | 0.74 | 0.225 | 3.24E-09 |
| NOP16    | 1.56E-13 | 0.664143531  | 0.5  | 0.039 | 3.40E-09 |
| DUSP6    | 1.58E-13 | 0.741024865  | 0.97 | 0.873 | 3.44E-09 |
| HSPG2    | 1.66E-13 | -0.731923075 | 0.76 | 0.951 | 3.62E-09 |
| TIMP1    | 1.67E-13 | 0.949417662  | 1    | 1     | 3.65E-09 |
| HSPA8    | 1.83E-13 | 0.766088698  | 0.98 | 0.971 | 3.99E-09 |
| ATP13A3  | 3.07E-13 | 0.849897089  | 0.64 | 0.137 | 6.69E-09 |
| CHIC2    | 3.09E-13 | 0.802764107  | 0.85 | 0.471 | 6.73E-09 |
| ADAMTS4  | 3.22E-13 | 0.980332181  | 0.88 | 0.49  | 7.03E-09 |
| EFNA1    | 3.47E-13 | -0.739666699 | 0.57 | 0.902 | 7.56E-09 |
| EIF4A1   | 5.29E-13 | 0.755534296  | 0.82 | 0.471 | 1.15E-08 |
| MESDC1   | 5.87E-13 | 0.988398526  | 0.62 | 0.157 | 1.28E-08 |
| NUAK1    | 9.20E-13 | -0.70959941  | 0.14 | 0.618 | 2.01E-08 |
| ANGPTL4  | 1.13E-12 | 1.043039892  | 0.71 | 0.235 | 2.47E-08 |
| MYL6     | 1.25E-12 | 0.559835053  | 0.98 | 0.99  | 2.73E-08 |
| ARID5A   | 1.61E-12 | 0.719343257  | 0.54 | 0.088 | 3.52E-08 |
| GIMAP1   | 2.17E-12 | -0.777342158 | 0.39 | 0.794 | 4.74E-08 |
| MIR22HG  | 2.25E-12 | 0.805026462  | 0.67 | 0.235 | 4.90E-08 |
| EHD4     | 2.94E-12 | 0.733250934  | 0.69 | 0.255 | 6.42E-08 |
| DNAJB6   | 3.18E-12 | 0.859922914  | 0.89 | 0.657 | 6.93E-08 |
| STAB2    | 4.15E-12 | -0.882932945 | 0.47 | 0.833 | 9.04E-08 |
| DLC1     | 5.59E-12 | 0.65730289   | 0.93 | 0.833 | 1.22E-07 |
| ATP1A1   | 6.17E-12 | 0.778049497  | 0.83 | 0.441 | 1.35E-07 |
| PLIN2    | 6.76E-12 | 0.696404746  | 0.87 | 0.657 | 1.47E-07 |
| PDK4     | 7.68E-12 | -0.877689782 | 0.6  | 0.902 | 1.67E-07 |
| TPM3     | 7.85E-12 | 0.594280965  | 0.97 | 0.755 | 1.71E-07 |
| SPHK1    | 7.86E-12 | 0.565424757  | 0.38 | 0     | 1.71E-07 |
| MALL     | 7.98E-12 | 0.864818772  | 0.55 | 0.108 | 1.74E-07 |
| CIRBP    | 8.60E-12 | -0.545279724 | 0.87 | 0.961 | 1.88E-07 |
| WARS     | 1.11E-11 | 0.706807975  | 0.87 | 0.539 | 2.42E-07 |
| RPS29    | 1.22E-11 | 0.442880297  | 0.98 | 0.951 | 2.66E-07 |
| CYCS     | 1.25E-11 | 0.706675476  | 0.77 | 0.402 | 2.72E-07 |
| ID1      | 1.25E-11 | -0.723298309 | 0.88 | 0.99  | 2.73E-07 |
| RIN2     | 1.28E-11 | 0.747918873  | 0.74 | 0.324 | 2.78E-07 |
| PHLDB1   | 1.30E-11 | 0.627917225  | 0.5  | 0.078 | 2.82E-07 |
| ADAMTS1  | 1.46E-11 | 0.875385501  | 0.9  | 0.588 | 3.19E-07 |
| NPY1R    | 1.61E-11 | -0.775026975 | 0.4  | 0.784 | 3.51E-07 |
| RASD1    | 1.84E-11 | 1.351552303  | 0.78 | 0.441 | 4.01E-07 |
| MARCKS   | 1.85E-11 | 0.76729977   | 0.84 | 0.569 | 4.04E-07 |
| FLT1     | 1.91E-11 | 0.682584334  | 0.94 | 0.892 | 4.17E-07 |
| CYR61    | 2.06E-11 | 0.957248677  | 0.62 | 0.167 | 4.49E-07 |
| ACTB     | 2.11E-11 | 0.553145997  | 1    | 1     | 4.59E-07 |
| TFPI2    | 2.46E-11 | 0.919180439  | 0.91 | 0.627 | 5.37E-07 |
| KLF2     | 3.20E-11 | -0.841487747 | 0.46 | 0.833 | 6.97E-07 |
| MCAM     | 4.98E-11 | 0.764122024  | 0.58 | 0.147 | 1.09E-06 |
| TOMM5    | 5.27E-11 | 0.741176002  | 0.77 | 0.451 | 1.15E-06 |
| JUNB     | 5.51E-11 | -0.652188487 | 0.98 | 0.99  | 1.20E-06 |
| SRGN     | 8.70E-11 | 0.681777746  | 0.99 | 0.931 | 1.90E-06 |
| GIMAP8   | 9.17E-11 | -0.740995245 | 0.22 | 0.627 | 2.00E-06 |
| EIF5A    | 9.74E-11 | 0.741874245  | 0.79 | 0.451 | 2.12E-06 |
| SPRY4    | 1.16E-10 | 0.793524306  | 0.77 | 0.412 | 2.53E-06 |
| ZYX      | 1.21E-10 | 0.82762081   | 0.74 | 0.431 | 2.63E-06 |
| MT2A     | 1.35E-10 | 1.419591558  | 0.96 | 0.853 | 2.93E-06 |
| BZW1     | 1.38E-10 | 0.737917124  | 0.79 | 0.5   | 3.01E-06 |
| MAFF     | 1.65E-10 | 0.747395152  | 0.68 | 0.265 | 3.60E-06 |
| SERPINB9 | 2.06E-10 | 0.682964462  | 0.74 | 0.343 | 4.49E-06 |
| B3GNT5   | 2.09E-10 | 0.702309504  | 0.49 | 0.088 | 4.56E-06 |
| SPSB3    | 2.10E-10 | -0.58481012  | 0.13 | 0.539 | 4.58E-06 |
| UGCG     | 2.13E-10 | 0.709081459  | 0.86 | 0.549 | 4.65E-06 |
| WDR43    | 2.18E-10 | 0.52956758   | 0.42 | 0.049 | 4.75E-06 |
| GPR4     | 2.30E-10 | 0.734210263  | 0.55 | 0.147 | 5.03E-06 |
| MCL1     | 2.53E-10 | 0.548902418  | 0.98 | 0.843 | 5.52E-06 |
| SNRNPB   | 2.59E-10 | 0.605487276  | 0.84 | 0.5   | 5.65E-06 |
| CLIC1    | 2.71E-10 | 0.512147552  | 0.97 | 0.951 | 5.90E-06 |
| PTPRB    | 2.72E-10 | -0.653806117 | 0.71 | 0.941 | 5.93E-06 |
| S1PR1    | 3.32E-10 | 0.622888797  | 0.91 | 0.843 | 7.23E-06 |
| DEFA3    | 3.83E-10 | -0.550142305 | 0.03 | 0.392 | 8.35E-06 |

|                |          |              |      |       |             |
|----------------|----------|--------------|------|-------|-------------|
| NFKBIZ         | 4.16E-10 | -0.698945857 | 0.47 | 0.863 | 9.08E-06    |
| RUNX1T1        | 4.22E-10 | -0.576939416 | 0.06 | 0.431 | 9.20E-06    |
| NME1           | 5.57E-10 | 0.593430315  | 0.42 | 0.049 | 1.22E-05    |
| PGK1           | 5.88E-10 | 0.667057282  | 0.84 | 0.578 | 1.28E-05    |
| TCEB1          | 6.17E-10 | 0.612380531  | 0.89 | 0.696 | 1.35E-05    |
| HLA-E          | 6.37E-10 | -0.357090343 | 1    | 1     | 1.39E-05    |
| RTEL1-TNFRSF6B | 6.42E-10 | 0.906350066  | 0.32 | 0     | 1.40E-05    |
| SNHG15         | 6.49E-10 | 0.630774317  | 0.64 | 0.225 | 1.42E-05    |
| ENG            | 8.25E-10 | -0.62600452  | 0.96 | 0.98  | 1.80E-05    |
| IL32           | 8.90E-10 | 0.956817267  | 0.53 | 0.147 | 1.94E-05    |
| FGL2           | 1.10E-09 | 0.574378047  | 0.43 | 0.059 | 2.40E-05    |
| EVA1C          | 1.12E-09 | 0.682142154  | 0.69 | 0.333 | 2.45E-05    |
| RELB           | 1.15E-09 | 0.534516418  | 0.46 | 0.078 | 2.51E-05    |
| GIMAP4         | 1.23E-09 | -0.641257422 | 0.57 | 0.843 | 2.68E-05    |
| PIM3           | 1.24E-09 | -0.662254169 | 0.17 | 0.588 | 2.70E-05    |
| ICAM1          | 1.25E-09 | 1.084592077  | 0.79 | 0.588 | 2.72E-05    |
| GPC1           | 1.31E-09 | 0.472725166  | 0.31 | 0     | 2.85E-05    |
| CREM           | 1.41E-09 | 0.624423809  | 0.55 | 0.167 | 3.07E-05    |
| ST6GAL1        | 1.62E-09 | -0.594370854 | 0.46 | 0.794 | 3.54E-05    |
| RAN            | 1.72E-09 | 0.630520949  | 0.81 | 0.529 | 3.75E-05    |
| KDM6B          | 1.98E-09 | 0.720042103  | 0.68 | 0.353 | 4.32E-05    |
| DLL4           | 2.11E-09 | -0.654331235 | 0.27 | 0.637 | 4.61E-05    |
| HNRNPAB        | 2.41E-09 | 0.68523611   | 0.55 | 0.167 | 5.25E-05    |
| PVRL2          | 2.62E-09 | 0.588908027  | 0.87 | 0.755 | 5.71E-05    |
| CXCL8          | 3.01E-09 | 1.48262731   | 0.45 | 0.098 | 6.56E-05    |
| CDC37          | 3.20E-09 | 0.516411234  | 0.93 | 0.882 | 6.98E-05    |
| PPRC1          | 3.27E-09 | 0.545083588  | 0.39 | 0.049 | 7.14E-05    |
| TMEM140        | 3.45E-09 | -0.539970555 | 0.26 | 0.637 | 7.53E-05    |
| TSC22D4        | 3.49E-09 | -0.61212472  | 0.08 | 0.441 | 7.60E-05    |
| MEIS2          | 4.06E-09 | -0.737266484 | 0.33 | 0.647 | 8.86E-05    |
| RHEB           | 4.11E-09 | 0.546441496  | 0.77 | 0.402 | 8.95E-05    |
| SDPR           | 4.41E-09 | -0.551757605 | 0.87 | 0.941 | 9.62E-05    |
| SEC61G         | 5.13E-09 | 0.531603453  | 0.91 | 0.716 | 0.00011188  |
| PDLIM3         | 5.56E-09 | 0.721523276  | 0.63 | 0.275 | 0.000121303 |
| GJA1           | 5.64E-09 | 0.670484869  | 0.38 | 0.049 | 0.000123087 |
| ID2            | 6.04E-09 | -0.698091771 | 0.59 | 0.833 | 0.000131746 |
| ZFP36          | 6.52E-09 | -0.650442871 | 0.98 | 1     | 0.000142086 |
| RAP1B          | 6.55E-09 | 0.605323447  | 0.91 | 0.706 | 0.000142736 |
| DNAJA4         | 7.35E-09 | 0.662569887  | 0.45 | 0.088 | 0.000160339 |
| RTN4           | 9.04E-09 | 0.561746512  | 0.86 | 0.657 | 0.000197144 |
| DOT1L          | 1.06E-08 | 0.556690811  | 0.3  | 0.01  | 0.000230825 |
| MAF            | 1.14E-08 | -0.591120793 | 0.74 | 0.922 | 0.000248933 |
| ARID5B         | 1.22E-08 | 0.607666449  | 0.67 | 0.265 | 0.000266584 |
| AHSA1          | 1.25E-08 | 0.595716039  | 0.47 | 0.118 | 0.00027259  |
| PLK3           | 1.29E-08 | 0.561303534  | 0.59 | 0.206 | 0.000281768 |
| GADD45A        | 1.30E-08 | 0.586704056  | 0.63 | 0.255 | 0.000282529 |
| YES1           | 1.31E-08 | 0.603844254  | 0.82 | 0.539 | 0.000286646 |
| GIMAP2         | 1.45E-08 | -0.562586657 | 0.19 | 0.529 | 0.000316456 |
| EIF3I          | 1.48E-08 | 0.612940164  | 0.82 | 0.52  | 0.000322324 |
| PTRH2          | 1.50E-08 | 0.514305033  | 0.42 | 0.078 | 0.000328169 |
| FOS            | 1.57E-08 | -0.633381843 | 0.98 | 0.99  | 0.000342427 |
| LATS2          | 1.63E-08 | 0.463613857  | 0.52 | 0.137 | 0.000354853 |
| PHLDA1         | 1.79E-08 | 1.019035804  | 0.6  | 0.265 | 0.000389436 |
| GRAP           | 1.91E-08 | -0.50506392  | 0.08 | 0.422 | 0.000415816 |
| HLA-DRB5       | 2.06E-08 | 0.668628134  | 0.94 | 0.804 | 0.000449689 |
| ISG20          | 2.07E-08 | 0.555630114  | 0.38 | 0.059 | 0.000452474 |
| PDLIM1         | 2.09E-08 | 0.428512514  | 0.99 | 0.971 | 0.000455803 |
| RPS16          | 2.13E-08 | 0.302059634  | 0.99 | 0.99  | 0.00046544  |
| TSSC4          | 2.25E-08 | 0.633627555  | 0.51 | 0.147 | 0.000491589 |
| GCC2           | 2.41E-08 | -0.61311382  | 0.15 | 0.49  | 0.000525805 |
| SLC20A1        | 2.47E-08 | 0.656348634  | 0.59 | 0.225 | 0.000538184 |
| RSRP1          | 2.54E-08 | -0.543301065 | 0.58 | 0.873 | 0.000553728 |
| C11orf96       | 2.59E-08 | 0.671044657  | 0.82 | 0.471 | 0.000565399 |
| ETS2           | 2.61E-08 | 0.45839718   | 0.96 | 0.882 | 0.000568402 |
| CLDN5          | 2.62E-08 | -0.53321084  | 0.84 | 0.961 | 0.000571968 |
| ART4           | 2.63E-08 | -0.556098522 | 0.26 | 0.608 | 0.000572805 |
| H3F3B          | 2.66E-08 | 0.356723877  | 1    | 0.98  | 0.000580866 |
| LIFR           | 2.75E-08 | -0.543885188 | 0.86 | 0.971 | 0.000599714 |
| SEPP1          | 2.81E-08 | -0.463348697 | 0.98 | 1     | 0.000613801 |
| NRP1           | 2.86E-08 | -0.505364662 | 0.57 | 0.843 | 0.000623215 |

|             |          |              |      |       |             |
|-------------|----------|--------------|------|-------|-------------|
| SNU13       | 2.91E-08 | 0.548683277  | 0.85 | 0.647 | 0.00063435  |
| VCAM1       | 2.94E-08 | 1.023115588  | 0.56 | 0.216 | 0.000640632 |
| ARHGAP23    | 3.41E-08 | 0.516959104  | 0.51 | 0.147 | 0.000743226 |
| INPP1       | 3.51E-08 | 0.60931916   | 0.73 | 0.451 | 0.000766083 |
| CLK1        | 3.71E-08 | -0.552387274 | 0.4  | 0.716 | 0.000808114 |
| YWHAH       | 3.75E-08 | 0.542587426  | 0.79 | 0.529 | 0.000818721 |
| YBX3        | 3.86E-08 | 0.623122924  | 0.8  | 0.539 | 0.000840905 |
| EIF1        | 4.13E-08 | 0.276440517  | 1    | 1     | 0.000900733 |
| COL4A3BP    | 4.32E-08 | -0.57876312  | 0.26 | 0.588 | 0.00094187  |
| CDKN1B      | 4.71E-08 | -0.548627458 | 0.25 | 0.588 | 0.00102747  |
| TEAD4       | 5.63E-08 | 0.601539514  | 0.64 | 0.275 | 0.001228173 |
| KLF10       | 5.73E-08 | -0.577422889 | 0.29 | 0.637 | 0.001248583 |
| PICALM      | 6.63E-08 | 0.497409482  | 0.59 | 0.206 | 0.001446432 |
| NOLC1       | 7.12E-08 | 0.597175945  | 0.62 | 0.275 | 0.001553498 |
| MANF        | 8.18E-08 | 0.463027136  | 0.72 | 0.382 | 0.001784406 |
| IRF2BPL     | 8.96E-08 | -0.551418576 | 0.24 | 0.569 | 0.001953283 |
| RELN        | 9.43E-08 | -0.732236715 | 0.25 | 0.569 | 0.002057241 |
| PEA15       | 9.46E-08 | 0.55342909   | 0.69 | 0.353 | 0.002064118 |
| FAM212A     | 9.73E-08 | -0.354732824 | 0.01 | 0.275 | 0.002121601 |
| FSTL3       | 9.83E-08 | 0.853244612  | 0.27 | 0.01  | 0.002142952 |
| CLK4        | 9.86E-08 | -0.511828849 | 0.06 | 0.363 | 0.002151267 |
| SLCO4A1     | 1.12E-07 | 0.560624885  | 0.66 | 0.294 | 0.002448091 |
| NRROS       | 1.21E-07 | -0.401117708 | 0.06 | 0.373 | 0.002634539 |
| NOP58       | 1.29E-07 | 0.50542584   | 0.64 | 0.284 | 0.002822037 |
| ITPR1       | 1.40E-07 | 0.574419964  | 0.56 | 0.225 | 0.003052472 |
| TINAGL1     | 1.42E-07 | 0.405702391  | 0.97 | 1     | 0.00309885  |
| PNPLA8      | 1.45E-07 | 0.546795721  | 0.63 | 0.314 | 0.003167063 |
| SOCS2       | 1.45E-07 | 0.595258515  | 0.84 | 0.569 | 0.003168618 |
| NUPR1       | 1.50E-07 | -0.568743828 | 0.51 | 0.775 | 0.003266933 |
| CRHBP       | 1.51E-07 | -0.477823436 | 0.99 | 1     | 0.003286939 |
| AP1S2       | 1.51E-07 | -0.47638842  | 0.69 | 0.873 | 0.003295778 |
| TUBA1C      | 1.52E-07 | 0.623983431  | 0.6  | 0.265 | 0.003310548 |
| MT-ND4L     | 1.55E-07 | -0.273637401 | 0.98 | 1     | 0.003373973 |
| TMEM59      | 1.57E-07 | -0.326475517 | 0.89 | 0.971 | 0.003424575 |
| STIP1       | 1.64E-07 | 0.44291595   | 0.4  | 0.088 | 0.003581888 |
| SERPINE1    | 1.65E-07 | 0.636881874  | 0.51 | 0.167 | 0.003590429 |
| SLC44A2     | 1.70E-07 | -0.576244514 | 0.52 | 0.765 | 0.003708816 |
| SMAD6       | 1.71E-07 | -0.5402142   | 0.11 | 0.412 | 0.003724795 |
| DDIT3       | 1.92E-07 | -0.630246496 | 0.26 | 0.569 | 0.004179629 |
| AKAP2       | 1.97E-07 | 0.572804442  | 0.58 | 0.255 | 0.004302498 |
| PHF3        | 2.02E-07 | -0.505383165 | 0.19 | 0.52  | 0.004405931 |
| TMEM204     | 2.06E-07 | -0.446892228 | 0.37 | 0.706 | 0.004493257 |
| ANXA2       | 2.14E-07 | 0.498186562  | 0.93 | 0.863 | 0.004656165 |
| ZFAND2A     | 2.15E-07 | 0.789019135  | 0.53 | 0.186 | 0.004680208 |
| PDLIM5      | 2.33E-07 | 0.618214243  | 0.68 | 0.363 | 0.005084047 |
| PNO1        | 2.35E-07 | 0.411707637  | 0.32 | 0.039 | 0.005121675 |
| MTHFD2      | 2.38E-07 | 0.451893889  | 0.37 | 0.069 | 0.005180571 |
| UBE2N       | 2.39E-07 | 0.523737746  | 0.71 | 0.392 | 0.005213753 |
| ILF2        | 2.45E-07 | 0.462695845  | 0.74 | 0.402 | 0.005351366 |
| TES         | 2.53E-07 | 0.412197479  | 0.3  | 0.029 | 0.005527327 |
| SSH1        | 2.69E-07 | 0.649670133  | 0.49 | 0.167 | 0.005877124 |
| SC5D        | 2.89E-07 | -0.594523134 | 0.57 | 0.843 | 0.006298145 |
| IQCJ-SCHIP1 | 3.19E-07 | 0.409678821  | 0.38 | 0.078 | 0.00696175  |
| OIT3        | 3.46E-07 | -0.564898606 | 0.88 | 0.951 | 0.00753705  |
| SNX6        | 3.76E-07 | -0.472414603 | 0.63 | 0.863 | 0.008193863 |
| FLNA        | 3.82E-07 | 0.519759703  | 0.39 | 0.088 | 0.008335923 |
| VIMP        | 3.89E-07 | 0.624739808  | 0.76 | 0.549 | 0.00848223  |
| ANKRD55     | 4.11E-07 | -0.513568602 | 0.11 | 0.412 | 0.008967462 |
| MTFP1       | 4.67E-07 | 0.41909776   | 0.25 | 0.01  | 0.010194421 |
| MT1X        | 4.72E-07 | 1.526040097  | 0.59 | 0.265 | 0.010288576 |
| LRRC32      | 4.73E-07 | 0.713399985  | 0.71 | 0.382 | 0.010319488 |
| LRRC59      | 4.88E-07 | 0.475356696  | 0.55 | 0.216 | 0.010644686 |
| TNFRSF10A   | 5.28E-07 | 0.31275748   | 0.27 | 0.02  | 0.011512381 |
| TNFRSF10B   | 5.53E-07 | 0.585911657  | 0.57 | 0.265 | 0.012067832 |
| PCMTD2      | 6.11E-07 | -0.512567252 | 0.21 | 0.52  | 0.013319744 |
| ACTG1       | 6.25E-07 | 0.467596088  | 0.98 | 0.98  | 0.013633911 |
| NOS3        | 6.30E-07 | 0.726231787  | 0.63 | 0.343 | 0.013742011 |
| MIF         | 6.73E-07 | 0.444666111  | 0.95 | 0.824 | 0.014687135 |
| F2R         | 6.78E-07 | -0.412905039 | 0.82 | 0.912 | 0.014789424 |
| DNAJB11     | 6.79E-07 | 0.6202179    | 0.62 | 0.333 | 0.014804266 |

|          |          |              |      |       |             |
|----------|----------|--------------|------|-------|-------------|
| BCL3     | 6.80E-07 | 0.527854621  | 0.51 | 0.196 | 0.01483562  |
| SDF2L1   | 7.06E-07 | 0.668943594  | 0.59 | 0.275 | 0.015390432 |
| F8       | 7.98E-07 | -0.467803671 | 0.83 | 0.98  | 0.017394428 |
| EIF2S1   | 8.08E-07 | 0.41977495   | 0.54 | 0.206 | 0.01762387  |
| HMOX2    | 8.15E-07 | 0.479871422  | 0.75 | 0.461 | 0.017765367 |
| SEMA6A   | 8.68E-07 | -0.503440883 | 0.52 | 0.784 | 0.018934763 |
| HBB      | 8.72E-07 | -2.793701344 | 0.14 | 0.451 | 0.019025441 |
| NCL      | 8.76E-07 | 0.470074673  | 0.88 | 0.706 | 0.019113975 |
| ARHGDI3  | 8.92E-07 | 0.536566416  | 0.79 | 0.51  | 0.019443873 |
| PTGES3   | 8.93E-07 | 0.476445195  | 0.97 | 0.853 | 0.019463727 |
| NAMPT    | 9.01E-07 | 0.461116031  | 0.96 | 0.843 | 0.019639712 |
| FAM84B   | 9.49E-07 | -0.380274149 | 0.08 | 0.373 | 0.020693967 |
| MORF4L2  | 1.03E-06 | 0.539991677  | 0.77 | 0.539 | 0.022422123 |
| SNRPD1   | 1.09E-06 | 0.489724993  | 0.63 | 0.304 | 0.023692685 |
| NOP10    | 1.09E-06 | 0.458221931  | 0.89 | 0.745 | 0.023817775 |
| ADAM15   | 1.21E-06 | 0.498244897  | 0.58 | 0.255 | 0.026278789 |
| FHL3     | 1.27E-06 | 0.416718892  | 0.33 | 0.059 | 0.027593013 |
| CREB5    | 1.29E-06 | 0.371695188  | 0.23 | 0.01  | 0.02817124  |
| ADGRG1   | 1.30E-06 | 0.516367751  | 0.69 | 0.392 | 0.028455115 |
| SH3BP5   | 1.31E-06 | 0.46079926   | 0.87 | 0.755 | 0.028590324 |
| NR4A2    | 1.38E-06 | -0.430393936 | 0.19 | 0.5   | 0.030022331 |
| ABCE1    | 1.41E-06 | 0.433927747  | 0.41 | 0.118 | 0.030666189 |
| FCHO2    | 1.46E-06 | -0.504614312 | 0.23 | 0.51  | 0.03182015  |
| MTHFR    | 1.48E-06 | -0.44471114  | 0.15 | 0.451 | 0.032238652 |
| SAT2     | 1.54E-06 | -0.398827873 | 0.49 | 0.784 | 0.033662043 |
| MT-CO3   | 1.57E-06 | -0.270817363 | 0.99 | 1     | 0.034344277 |
| DUSP1    | 1.59E-06 | -0.370440172 | 0.98 | 0.99  | 0.03475842  |
| STARD4   | 1.60E-06 | 0.4884306    | 0.38 | 0.098 | 0.034852592 |
| HNRNPU   | 1.65E-06 | 0.379707062  | 0.91 | 0.647 | 0.036022477 |
| B4GALT5  | 1.65E-06 | 0.493715244  | 0.63 | 0.304 | 0.036081727 |
| PPARD    | 1.68E-06 | 0.337753123  | 0.29 | 0.039 | 0.03661838  |
| GRN      | 1.69E-06 | -0.414212704 | 0.87 | 0.951 | 0.036820796 |
| SHE      | 1.78E-06 | -0.517580941 | 0.2  | 0.48  | 0.038750175 |
| VAPA     | 1.82E-06 | 0.443448019  | 0.93 | 0.794 | 0.039593476 |
| LPAR6    | 1.95E-06 | -0.477720851 | 0.84 | 0.892 | 0.042422853 |
| CHKA     | 1.96E-06 | -0.367773555 | 0.06 | 0.324 | 0.042687679 |
| FOXN2    | 2.01E-06 | -0.408362433 | 0.11 | 0.392 | 0.043774396 |
| ALPL     | 2.01E-06 | 0.644695989  | 0.53 | 0.225 | 0.043804228 |
| MRTO4    | 2.10E-06 | 0.356926539  | 0.29 | 0.039 | 0.045748772 |
| NR2F2    | 2.19E-06 | -0.516522365 | 0.51 | 0.755 | 0.04772945  |
| DNASE1L3 | 2.20E-06 | -0.373250881 | 0.99 | 1     | 0.047986446 |
| CRACR2B  | 2.22E-06 | -0.544610005 | 0.21 | 0.48  | 0.048493596 |

List of differentially expressed genes of STAB1 LSEC in reperfusion stage (PR versus EP)

| gene        | p_val    | avg_logFC    | pct.1 | pct.2 | p_val_adj   |
|-------------|----------|--------------|-------|-------|-------------|
| HSPE1       | 2.68E-17 | 1.975838608  | 0.848 | 0.213 | 5.84E-13    |
| HSPB1       | 2.96E-15 | 1.555256335  | 0.967 | 0.689 | 6.45E-11    |
| HSPD1       | 3.46E-15 | 1.744803814  | 0.837 | 0.311 | 7.55E-11    |
| TM4SF1      | 7.17E-15 | 1.343069499  | 0.989 | 0.852 | 1.56E-10    |
| AKAP12      | 1.26E-12 | 0.954823504  | 0.978 | 0.836 | 2.75E-08    |
| HSP90AA1    | 2.04E-12 | 1.251691561  | 0.924 | 0.689 | 4.44E-08    |
| HSP90AB1    | 4.69E-12 | 0.976259732  | 0.967 | 0.672 | 1.02E-07    |
| ID3         | 6.85E-12 | -1.21577975  | 0.446 | 0.902 | 1.49E-07    |
| ADAMTS9     | 8.32E-12 | 1.773775433  | 0.63  | 0.082 | 1.82E-07    |
| EMP1        | 2.32E-11 | 1.72992772   | 0.685 | 0.148 | 5.05E-07    |
| ENG         | 2.63E-11 | -0.993320186 | 0.739 | 0.934 | 5.72E-07    |
| SAT1        | 2.95E-11 | 1.135566308  | 0.978 | 0.787 | 6.44E-07    |
| CD9         | 4.01E-11 | 0.998904223  | 0.935 | 0.607 | 8.75E-07    |
| PNP         | 1.04E-10 | 1.40992749   | 0.652 | 0.164 | 2.27E-06    |
| TIMP1       | 8.02E-10 | 1.014711916  | 0.989 | 0.951 | 1.75E-05    |
| TACC1       | 8.93E-10 | -0.91105336  | 0.293 | 0.738 | 1.95E-05    |
| MT2A        | 9.58E-10 | 1.600772306  | 0.967 | 0.852 | 2.09E-05    |
| EFNA1       | 2.19E-09 | -0.922418124 | 0.25  | 0.738 | 4.78E-05    |
| IGFBP4      | 5.98E-09 | -0.765474124 | 0.663 | 0.918 | 0.000130348 |
| PLAUR       | 7.62E-09 | 1.135221788  | 0.522 | 0.049 | 0.000166105 |
| MIR4435-2HG | 8.13E-09 | 1.353520566  | 0.554 | 0.115 | 0.00017727  |
| RELN        | 1.08E-08 | -1.069137507 | 0.293 | 0.721 | 0.000234962 |



|          |          |              |       |       |             |
|----------|----------|--------------|-------|-------|-------------|
| HLA-E    | 1.11E-08 | -0.532142976 | 0.891 | 0.967 | 0.000241061 |
| HSPA1A   | 1.17E-08 | 0.927217319  | 0.935 | 0.656 | 0.000255527 |
| AGFG2    | 1.20E-08 | -0.918089475 | 0.076 | 0.492 | 0.000261285 |
| CIRBP    | 1.87E-08 | -0.801610919 | 0.457 | 0.787 | 0.000408417 |
| THBD     | 2.16E-08 | 1.19473522   | 0.663 | 0.246 | 0.000470916 |
| MIR222HG | 2.29E-08 | 1.220999556  | 0.467 | 0.049 | 0.000500057 |
| TOMM5    | 2.42E-08 | 0.969120338  | 0.652 | 0.262 | 0.000528208 |
| CD4      | 4.31E-08 | -0.817322286 | 0.467 | 0.82  | 0.00094021  |
| HES1     | 5.16E-08 | -1.034133509 | 0.174 | 0.59  | 0.001124509 |
| ADAMTS1  | 5.84E-08 | 1.258448895  | 0.652 | 0.213 | 0.001273254 |
| DEFA3    | 6.02E-08 | -0.839655531 | 0.043 | 0.393 | 0.001312143 |
| CYR61    | 6.51E-08 | 1.160600331  | 0.38  | 0     | 0.0014197   |
| MT1X     | 7.03E-08 | 1.812331123  | 0.728 | 0.443 | 0.001533957 |
| ADD3     | 8.36E-08 | -0.804293202 | 0.207 | 0.623 | 0.001824099 |
| TSC22D4  | 8.93E-08 | -0.892627665 | 0.043 | 0.377 | 0.001947511 |
| OIT3     | 9.22E-08 | -0.767916796 | 0.62  | 0.869 | 0.002009741 |
| HSPG2    | 1.12E-07 | -0.93225696  | 0.62  | 0.885 | 0.002451525 |
| SH3BGL3  | 1.31E-07 | 0.910499583  | 0.793 | 0.607 | 0.002856135 |
| PDE2A    | 1.74E-07 | -0.623877349 | 0.293 | 0.705 | 0.003792535 |
| NOTCH4   | 2.00E-07 | -0.978030294 | 0.359 | 0.721 | 0.004365093 |
| CDC42EP2 | 2.17E-07 | 1.090543212  | 0.38  | 0.016 | 0.004724046 |
| BZW1     | 2.55E-07 | 0.95507687   | 0.478 | 0.082 | 0.005568846 |
| ADAMTS4  | 2.64E-07 | 1.093197541  | 0.609 | 0.197 | 0.005747994 |
| TMSB10   | 3.48E-07 | 0.595229774  | 1     | 0.984 | 0.007579173 |
| ACP5     | 3.54E-07 | -0.818525364 | 0.685 | 0.918 | 0.007728312 |
| HLA-DRB1 | 3.63E-07 | 0.701583791  | 0.913 | 0.705 | 0.007906438 |
| HSPA1B   | 3.67E-07 | 0.745783058  | 0.859 | 0.508 | 0.008004333 |
| PIM3     | 6.67E-07 | -0.719921483 | 0.098 | 0.459 | 0.014544545 |
| LMNA     | 7.07E-07 | 1.196170122  | 0.576 | 0.23  | 0.015419117 |
| MYADM    | 7.09E-07 | 1.076860265  | 0.565 | 0.213 | 0.015471823 |
| NRP1     | 7.32E-07 | -0.800988311 | 0.272 | 0.656 | 0.015974113 |
| PDCD4    | 7.92E-07 | -0.785783598 | 0.163 | 0.525 | 0.017281921 |
| SLC44A2  | 8.21E-07 | -0.82436072  | 0.174 | 0.525 | 0.017908571 |
| GIMAP2   | 8.50E-07 | -0.82779189  | 0.109 | 0.443 | 0.018527168 |
| MCL1     | 8.88E-07 | 0.810910262  | 0.783 | 0.541 | 0.01936357  |
| MFNG     | 1.18E-06 | -0.691123667 | 0.043 | 0.344 | 0.025732554 |
| POMP     | 1.19E-06 | 0.716113273  | 0.793 | 0.574 | 0.025877856 |
| AMHR2    | 1.34E-06 | -0.689875041 | 0.033 | 0.311 | 0.029259666 |
| TGFBR3   | 1.42E-06 | -0.665452273 | 0.37  | 0.77  | 0.030865597 |
| BAG3     | 1.47E-06 | 1.216084234  | 0.489 | 0.148 | 0.032004742 |
| STAB2    | 1.52E-06 | -0.95750428  | 0.478 | 0.787 | 0.033090995 |
| SNRPD1   | 1.54E-06 | 0.905819084  | 0.435 | 0.082 | 0.03356552  |
| SRGN     | 1.56E-06 | 0.85755152   | 0.848 | 0.623 | 0.033973655 |
| FOSL1    | 1.68E-06 | 0.972488049  | 0.337 | 0.016 | 0.036701524 |
| MESDC1   | 1.75E-06 | 0.915599685  | 0.457 | 0.098 | 0.038078102 |
| WWP1     | 1.82E-06 | -0.699857981 | 0.054 | 0.361 | 0.039695297 |
| MRC1     | 1.83E-06 | -0.706971092 | 0.576 | 0.885 | 0.039877236 |
| DDIT4    | 1.97E-06 | -0.986872948 | 0.359 | 0.689 | 0.042895272 |
| GPR4     | 2.13E-06 | 0.815368432  | 0.337 | 0.016 | 0.046375015 |
| HLA-DRB5 | 2.18E-06 | 0.839851661  | 0.739 | 0.443 | 0.047436286 |
| MYL6     | 2.25E-06 | 0.52665482   | 0.967 | 0.885 | 0.049141387 |

List of differentially expressed genes of MGP\_VEC in reperfusion stage (PR versus EP)

| gene    | p val    | avg logFC    | pct.1 | pct.2 | p val adj |
|---------|----------|--------------|-------|-------|-----------|
| EMP1    | 1.30E-24 | 1.659096934  | 0.968 | 0.63  | 2.84E-20  |
| AKAP12  | 1.95E-22 | 2.036046952  | 0.912 | 0.384 | 4.25E-18  |
| TIMP1   | 5.27E-22 | 2.321936891  | 0.976 | 0.945 | 1.15E-17  |
| PNP     | 1.31E-21 | 1.642983119  | 0.904 | 0.356 | 2.87E-17  |
| HES1    | 2.64E-20 | -1.375308072 | 0.232 | 0.849 | 5.75E-16  |
| LMNA    | 3.91E-20 | 1.582799683  | 0.912 | 0.63  | 8.52E-16  |
| HSPB1   | 5.85E-20 | 1.372243031  | 0.984 | 0.89  | 1.28E-15  |
| RHOB    | 3.74E-19 | -1.194784567 | 0.664 | 0.986 | 8.16E-15  |
| TM4SF1  | 4.44E-19 | 1.080822155  | 1     | 0.986 | 9.69E-15  |
| JUNB    | 6.03E-19 | -0.973324052 | 0.864 | 0.986 | 1.32E-14  |
| ADAMTS9 | 1.25E-18 | 1.79141437   | 0.784 | 0.151 | 2.72E-14  |
| SAT1    | 9.93E-18 | 1.381547364  | 0.992 | 0.904 | 2.17E-13  |
| HES4    | 1.25E-17 | 1.769151604  | 0.72  | 0.082 | 2.74E-13  |

|             |          |              |       |       |             |
|-------------|----------|--------------|-------|-------|-------------|
| TSC22D3     | 7.44E-17 | -1.114037839 | 0.448 | 0.877 | 1.62E-12    |
| HSP90AA1    | 1.72E-16 | 1.271495596  | 0.928 | 0.904 | 3.76E-12    |
| PLAUR       | 1.81E-16 | 1.659453562  | 0.656 | 0.041 | 3.96E-12    |
| DDIT4       | 5.39E-16 | -1.100380394 | 0.656 | 0.959 | 1.18E-11    |
| TXNIP       | 7.66E-16 | -1.042803804 | 0.136 | 0.671 | 1.67E-11    |
| RUNX1T1     | 8.69E-16 | -0.919526963 | 0.04  | 0.534 | 1.89E-11    |
| ANGPTL4     | 8.77E-16 | 1.507852643  | 0.824 | 0.288 | 1.91E-11    |
| UPP1        | 1.84E-15 | 1.334448747  | 0.8   | 0.329 | 4.01E-11    |
| FOS         | 8.22E-15 | -0.957457471 | 0.872 | 1     | 1.79E-10    |
| HSPA1A      | 1.04E-14 | 1.076330115  | 0.968 | 0.836 | 2.26E-10    |
| MT2A        | 1.21E-14 | 1.835896434  | 0.976 | 0.918 | 2.64E-10    |
| C11orf96    | 4.48E-14 | 1.278326176  | 0.816 | 0.315 | 9.77E-10    |
| DDX21       | 6.58E-14 | 1.222591984  | 0.752 | 0.301 | 1.44E-09    |
| HSPA1B      | 1.47E-13 | 1.063490713  | 0.936 | 0.795 | 3.20E-09    |
| ADAMTS4     | 1.64E-13 | 1.396815202  | 0.776 | 0.356 | 3.57E-09    |
| CD59        | 1.95E-13 | 0.776192173  | 0.944 | 0.795 | 4.26E-09    |
| MYC         | 2.34E-13 | 1.207138775  | 0.848 | 0.534 | 5.11E-09    |
| SH3BGR3     | 2.92E-13 | 0.916666976  | 0.888 | 0.781 | 6.37E-09    |
| FOSL1       | 3.00E-13 | 1.351541665  | 0.6   | 0.082 | 6.53E-09    |
| HSP90AB1    | 3.23E-13 | 0.759846934  | 0.976 | 0.932 | 7.05E-09    |
| TCEB1       | 7.04E-13 | 1.203728162  | 0.792 | 0.479 | 1.53E-08    |
| THBD        | 7.44E-13 | 1.151594969  | 0.832 | 0.466 | 1.62E-08    |
| IER2        | 9.21E-13 | -0.848850173 | 0.824 | 0.986 | 2.01E-08    |
| EGR1        | 1.58E-12 | -0.96276365  | 0.496 | 0.89  | 3.45E-08    |
| VCAM1       | 2.11E-12 | 1.571820915  | 0.68  | 0.192 | 4.60E-08    |
| BAG3        | 2.26E-12 | 1.458085408  | 0.744 | 0.37  | 4.93E-08    |
| HSPE1       | 3.13E-12 | 1.485950018  | 0.76  | 0.466 | 6.83E-08    |
| KLF2        | 4.20E-12 | -0.873420337 | 0.44  | 0.849 | 9.16E-08    |
| MT1X        | 4.31E-12 | 2.305854004  | 0.752 | 0.37  | 9.41E-08    |
| HSPD1       | 6.89E-12 | 1.426412629  | 0.752 | 0.397 | 1.50E-07    |
| LITAF       | 1.71E-11 | 1.210983967  | 0.72  | 0.397 | 3.73E-07    |
| TNFRSF12A   | 1.81E-11 | 1.186259755  | 0.48  | 0.014 | 3.94E-07    |
| MYADM       | 3.19E-11 | 1.041073821  | 0.832 | 0.575 | 6.96E-07    |
| MIR4435-2HG | 4.91E-11 | 1.248563977  | 0.648 | 0.247 | 1.07E-06    |
| EFNA1       | 6.60E-11 | -0.745634493 | 0.512 | 0.904 | 1.44E-06    |
| HSPH1       | 7.68E-11 | 1.216373987  | 0.704 | 0.301 | 1.67E-06    |
| KIAA1551    | 8.11E-11 | -0.639362906 | 0.016 | 0.342 | 1.77E-06    |
| KDM6B       | 9.22E-11 | 1.171590017  | 0.616 | 0.192 | 2.01E-06    |
| ZFP36       | 2.37E-10 | -0.688056793 | 0.904 | 0.986 | 5.17E-06    |
| SLC44A2     | 3.20E-10 | -0.73145967  | 0.192 | 0.603 | 6.97E-06    |
| ID3         | 3.48E-10 | -0.713416677 | 0.776 | 0.973 | 7.59E-06    |
| JUN         | 6.46E-10 | -0.790403914 | 0.88  | 1     | 1.41E-05    |
| MAT2A       | 6.80E-10 | 1.101019084  | 0.696 | 0.342 | 1.48E-05    |
| ID2         | 7.12E-10 | -0.870629853 | 0.496 | 0.808 | 1.55E-05    |
| ADAMTS1     | 7.90E-10 | 0.910220311  | 0.88  | 0.671 | 1.72E-05    |
| SGMS2       | 7.95E-10 | 0.962375942  | 0.4   | 0     | 1.73E-05    |
| MT1A        | 1.31E-09 | 1.958462083  | 0.488 | 0.082 | 2.85E-05    |
| IL6         | 1.38E-09 | 1.881758241  | 0.408 | 0.014 | 3.01E-05    |
| NR2F2-AS1   | 1.43E-09 | -0.681957964 | 0.04  | 0.356 | 3.12E-05    |
| S100A6      | 1.61E-09 | 0.969220488  | 0.92  | 0.822 | 3.51E-05    |
| GIMAP1      | 1.74E-09 | -0.818724935 | 0.24  | 0.616 | 3.80E-05    |
| CIRBP       | 2.13E-09 | -0.566333737 | 0.648 | 0.932 | 4.64E-05    |
| ICAM1       | 2.13E-09 | 1.510355422  | 0.64  | 0.233 | 4.65E-05    |
| ATP1A1      | 2.24E-09 | 0.889679964  | 0.784 | 0.548 | 4.88E-05    |
| LDLR        | 2.31E-09 | 0.874166912  | 0.528 | 0.11  | 5.04E-05    |
| PTPRB       | 2.45E-09 | -0.655522984 | 0.6   | 0.89  | 5.34E-05    |
| NUAK1       | 2.71E-09 | -0.770460627 | 0.104 | 0.466 | 5.92E-05    |
| TUBB6       | 2.88E-09 | 1.002902242  | 0.608 | 0.219 | 6.27E-05    |
| CYCS        | 3.13E-09 | 0.862875649  | 0.648 | 0.274 | 6.82E-05    |
| INSIG1      | 3.17E-09 | 1.293900899  | 0.592 | 0.205 | 6.91E-05    |
| DUSP1       | 3.28E-09 | -0.57686737  | 0.928 | 0.986 | 7.16E-05    |
| GIMAP7      | 3.47E-09 | -0.58938832  | 0.168 | 0.589 | 7.57E-05    |
| KLF6        | 4.72E-09 | 0.831295644  | 0.824 | 0.644 | 0.000102951 |
| CLEC14A     | 5.18E-09 | -0.620623576 | 0.776 | 0.932 | 0.000112987 |
| TMEM70      | 5.69E-09 | 0.977043252  | 0.528 | 0.123 | 0.000124037 |
| MECOM       | 6.28E-09 | -0.804087177 | 0.224 | 0.575 | 0.000137037 |
| EIF1        | 6.97E-09 | 0.387607194  | 1     | 0.986 | 0.000151917 |
| HIF3A       | 7.16E-09 | -0.82019545  | 0.112 | 0.466 | 0.000156088 |
| TOMM5       | 7.65E-09 | 0.929873421  | 0.68  | 0.342 | 0.000166813 |
| NOP16       | 8.09E-09 | 0.920543024  | 0.432 | 0.041 | 0.000176421 |

|           |          |              |       |       |             |
|-----------|----------|--------------|-------|-------|-------------|
| RNF144B   | 8.23E-09 | -0.475399816 | 0.04  | 0.356 | 0.000179583 |
| NOS3      | 8.31E-09 | 0.994517884  | 0.608 | 0.205 | 0.000181227 |
| ACKR3     | 9.11E-09 | 0.893184628  | 0.52  | 0.096 | 0.000198564 |
| CCL2      | 9.11E-09 | 1.758144622  | 0.576 | 0.178 | 0.000198628 |
| DLL4      | 9.26E-09 | -0.682093841 | 0.248 | 0.644 | 0.000202001 |
| POMP      | 9.43E-09 | 0.777425089  | 0.848 | 0.644 | 0.000205638 |
| TRIB1     | 1.13E-08 | 0.942450866  | 0.456 | 0.068 | 0.000247251 |
| HSPA5     | 1.14E-08 | 1.414265792  | 0.8   | 0.534 | 0.000248767 |
| CLDN5     | 1.29E-08 | -0.638704731 | 0.504 | 0.904 | 0.000281727 |
| TMEM204   | 1.34E-08 | -0.596386429 | 0.16  | 0.534 | 0.000293187 |
| RSRP1     | 1.75E-08 | -0.54710231  | 0.32  | 0.726 | 0.000381726 |
| HLA-E     | 1.82E-08 | -0.40853776  | 0.96  | 0.986 | 0.000396261 |
| ZFP36L2   | 2.09E-08 | -0.632219804 | 0.568 | 0.863 | 0.000455772 |
| EVA1C     | 2.36E-08 | 0.830472722  | 0.68  | 0.329 | 0.000514301 |
| CDC42EP2  | 2.58E-08 | 0.844810893  | 0.456 | 0.082 | 0.000562953 |
| WARS      | 2.79E-08 | 0.916341118  | 0.72  | 0.438 | 0.000609348 |
| SDPR      | 2.95E-08 | -0.664732936 | 0.592 | 0.877 | 0.000643961 |
| NR4A2     | 3.24E-08 | -0.739971723 | 0.184 | 0.534 | 0.000706171 |
| STC1      | 3.58E-08 | 1.367284431  | 0.512 | 0.151 | 0.000781517 |
| MESDC1    | 4.30E-08 | 0.903223714  | 0.464 | 0.096 | 0.000937584 |
| GIMAP4    | 4.32E-08 | -0.648503987 | 0.344 | 0.712 | 0.000942365 |
| GADD45A   | 4.36E-08 | 0.869465726  | 0.592 | 0.219 | 0.000951681 |
| SERPINB1  | 4.41E-08 | 1.095660785  | 0.784 | 0.63  | 0.000962315 |
| EDN1      | 5.50E-08 | -0.880278374 | 0.216 | 0.562 | 0.001199357 |
| SLCO4A1   | 5.70E-08 | 0.818519947  | 0.416 | 0.055 | 0.001242231 |
| BIRC3     | 6.39E-08 | 1.101601228  | 0.368 | 0.027 | 0.001392626 |
| SLC40A1   | 6.78E-08 | -0.637834451 | 0.312 | 0.671 | 0.001477944 |
| HEY1      | 7.03E-08 | -0.592272942 | 0.136 | 0.479 | 0.001532975 |
| LINC00152 | 7.29E-08 | 1.026615441  | 0.544 | 0.205 | 0.001589968 |
| RNF187    | 7.43E-08 | -0.556815427 | 0.144 | 0.479 | 0.001621041 |
| NPY1R     | 8.40E-08 | -0.59639982  | 0.192 | 0.548 | 0.001831311 |
| SORBS3    | 8.50E-08 | -0.502706804 | 0.224 | 0.616 | 0.001853387 |
| HBB       | 1.01E-07 | -0.638371966 | 0.096 | 0.425 | 0.002207199 |
| ZFP36L1   | 1.04E-07 | -0.684536326 | 0.512 | 0.863 | 0.002270436 |
| EIF5A     | 1.10E-07 | 0.80238914   | 0.664 | 0.397 | 0.0023969   |
| CALHM2    | 1.10E-07 | -0.529904244 | 0.072 | 0.37  | 0.002399891 |
| HOXB2     | 1.16E-07 | -0.442909976 | 0.024 | 0.274 | 0.002533692 |
| PLPP3     | 1.18E-07 | 0.649630338  | 0.912 | 0.877 | 0.00256674  |
| CHIC2     | 1.22E-07 | 0.829545632  | 0.68  | 0.37  | 0.002656589 |
| BCL3      | 1.28E-07 | 0.957610382  | 0.464 | 0.11  | 0.002793561 |
| MMRN1     | 1.39E-07 | -0.620938658 | 0.336 | 0.671 | 0.003036825 |
| PNKD      | 1.60E-07 | -0.527107524 | 0.2   | 0.521 | 0.003481183 |
| LDB2      | 1.62E-07 | -0.534281094 | 0.728 | 0.89  | 0.003532732 |
| HMGA1     | 1.65E-07 | 0.840782959  | 0.392 | 0.055 | 0.003593643 |
| MT1M      | 1.72E-07 | 1.91295102   | 0.64  | 0.329 | 0.003755236 |
| KIAA1033  | 1.93E-07 | -0.62348295  | 0.08  | 0.37  | 0.004213809 |
| SNRPB     | 2.07E-07 | 0.740583631  | 0.664 | 0.342 | 0.004506359 |
| SPHK1     | 2.15E-07 | 0.769000055  | 0.328 | 0.014 | 0.004685671 |
| EIF3I     | 2.61E-07 | 0.655943711  | 0.68  | 0.411 | 0.005694909 |
| H3F3B     | 2.69E-07 | 0.447784047  | 0.976 | 0.945 | 0.005864076 |
| TMSB10    | 3.08E-07 | 0.439151028  | 1     | 0.986 | 0.006726247 |
| GIMAP2    | 3.17E-07 | -0.490815    | 0.064 | 0.342 | 0.00691453  |
| NKTR      | 3.26E-07 | -0.436538353 | 0.168 | 0.534 | 0.00710418  |
| R3HDM4    | 3.39E-07 | 0.669244785  | 0.32  | 0.014 | 0.007391519 |
| JUND      | 3.57E-07 | 0.673255374  | 0.848 | 0.616 | 0.007781213 |
| IMP3      | 4.04E-07 | -0.390300417 | 0.144 | 0.479 | 0.008814121 |
| SBNO2     | 4.41E-07 | 0.924539115  | 0.4   | 0.068 | 0.009622206 |
| ARID5A    | 4.41E-07 | 0.795598238  | 0.512 | 0.164 | 0.009622595 |
| RALGDS    | 4.61E-07 | 0.821553093  | 0.52  | 0.164 | 0.010057987 |
| BTG2      | 4.70E-07 | -0.634293624 | 0.168 | 0.479 | 0.010249943 |
| S100A11   | 4.98E-07 | 0.621291769  | 0.896 | 0.726 | 0.010863195 |
| SMAD7     | 5.07E-07 | -0.616795853 | 0.088 | 0.384 | 0.01105011  |
| STOM      | 5.12E-07 | 0.525625536  | 0.896 | 0.863 | 0.011157994 |
| ZFYVE21   | 5.17E-07 | -0.524332216 | 0.096 | 0.384 | 0.011283459 |
| EGFL7     | 5.42E-07 | -0.461773536 | 0.672 | 0.959 | 0.011819912 |
| CFL1      | 5.95E-07 | 0.560169676  | 0.864 | 0.849 | 0.01297209  |
| EPHA4     | 6.36E-07 | -0.407200044 | 0.064 | 0.329 | 0.013871586 |
| CCDC28A   | 6.65E-07 | -0.385404697 | 0.04  | 0.288 | 0.014510582 |
| SHE       | 7.36E-07 | -0.634921475 | 0.152 | 0.466 | 0.01605814  |
| JMJD1C    | 7.92E-07 | 0.703115044  | 0.816 | 0.644 | 0.017278425 |

|                |          |              |       |       |             |
|----------------|----------|--------------|-------|-------|-------------|
| RTEL1-TNFRSF6B | 7.92E-07 | 1.051837057  | 0.28  | 0     | 0.017282199 |
| SQRDL          | 8.12E-07 | -0.420851532 | 0.048 | 0.301 | 0.017713009 |
| UBL7           | 8.15E-07 | -0.431782803 | 0.064 | 0.329 | 0.017768699 |
| ACTB           | 8.31E-07 | 0.619561892  | 0.976 | 1     | 0.018117411 |
| RFTN2          | 8.42E-07 | -0.378961775 | 0.024 | 0.247 | 0.018357599 |
| SOX17          | 8.53E-07 | 0.974695351  | 0.664 | 0.384 | 0.018596273 |
| FAM212A        | 8.54E-07 | -0.446410667 | 0.008 | 0.205 | 0.018631542 |
| HSPG2          | 8.61E-07 | -0.453016626 | 0.824 | 1     | 0.018769884 |
| KLF10          | 9.32E-07 | -0.616857764 | 0.304 | 0.63  | 0.020329599 |
| PIK3IP1        | 1.07E-06 | -0.382792876 | 0.008 | 0.205 | 0.023251445 |
| MALL           | 1.09E-06 | 0.848321851  | 0.496 | 0.192 | 0.02384662  |
| CCDC174        | 1.18E-06 | -0.342600349 | 0.056 | 0.315 | 0.025800658 |
| MAT2B          | 1.23E-06 | -0.446431391 | 0.12  | 0.411 | 0.026743451 |
| SYPL1          | 1.23E-06 | -0.552428829 | 0.544 | 0.822 | 0.026929931 |
| PKIG           | 1.33E-06 | 1.052767635  | 0.56  | 0.26  | 0.028950259 |
| BNIP3L         | 1.40E-06 | -0.481658774 | 0.344 | 0.671 | 0.030515244 |
| ETS2           | 1.50E-06 | 0.668340776  | 0.784 | 0.658 | 0.032736885 |
| SERPINB9       | 1.53E-06 | 0.895555981  | 0.632 | 0.397 | 0.033400088 |
| TNFSF10        | 1.55E-06 | -0.566545868 | 0.248 | 0.575 | 0.033750854 |
| SPSB3          | 1.71E-06 | -0.449826018 | 0.112 | 0.411 | 0.03726517  |
| ZBTB16         | 1.72E-06 | -0.423793613 | 0.08  | 0.356 | 0.03752683  |
| PLEC           | 1.74E-06 | 0.848026115  | 0.6   | 0.288 | 0.038054471 |
| TFPI2          | 1.93E-06 | 1.205211116  | 0.576 | 0.301 | 0.042073594 |
| NRROS          | 2.19E-06 | -0.345030907 | 0.008 | 0.192 | 0.047860947 |
| EHD4           | 2.25E-06 | 0.691244432  | 0.528 | 0.205 | 0.049113886 |

List of differentially expressed genes of NUPR1 LSEC in reperfusion stage (PR versus EP)

| gene        | p val    | avg logFC    | pct.1 | pct.2 | p val adj   |
|-------------|----------|--------------|-------|-------|-------------|
| HSPA1A      | 5.54E-37 | 3.328646743  | 0.968 | 0.088 | 1.21E-32    |
| HSPA1B      | 1.41E-33 | 2.647444129  | 0.914 | 0.053 | 3.08E-29    |
| HSPE1       | 7.46E-30 | 2.581051628  | 0.871 | 0.115 | 1.63E-25    |
| HSPD1       | 1.30E-27 | 2.593983836  | 0.774 | 0.035 | 2.84E-23    |
| HSPB1       | 4.64E-26 | 1.899736167  | 0.957 | 0.655 | 1.01E-21    |
| DNAJB1      | 6.61E-25 | 2.152486843  | 0.828 | 0.133 | 1.44E-20    |
| BAG3        | 1.38E-22 | 2.357046659  | 0.667 | 0.027 | 3.00E-18    |
| CDKN1A      | 7.67E-20 | 2.021844206  | 0.688 | 0.088 | 1.67E-15    |
| HSPH1       | 2.41E-19 | 1.95893929   | 0.602 | 0.027 | 5.26E-15    |
| HSP90AA1    | 3.36E-19 | 1.470934066  | 0.871 | 0.398 | 7.32E-15    |
| MT2A        | 1.46E-17 | 2.007325785  | 0.882 | 0.54  | 3.19E-13    |
| ZFAND2A     | 5.36E-15 | 2.131903437  | 0.484 | 0.027 | 1.17E-10    |
| ID3         | 9.68E-14 | -1.360774888 | 0.258 | 0.77  | 2.11E-09    |
| HSP90AB1    | 5.73E-13 | 1.199067671  | 0.763 | 0.363 | 1.25E-08    |
| LITAF       | 1.03E-12 | 1.348783482  | 0.591 | 0.15  | 2.25E-08    |
| MCL1        | 2.74E-12 | 1.368357921  | 0.548 | 0.106 | 5.98E-08    |
| HSPA8       | 5.87E-12 | 1.285743264  | 0.785 | 0.442 | 1.28E-07    |
| MIR4435-2HG | 6.25E-12 | 1.445543045  | 0.419 | 0.035 | 1.36E-07    |
| SAT1        | 1.32E-11 | 0.979016696  | 0.86  | 0.602 | 2.88E-07    |
| NR4A1       | 1.82E-11 | 1.343516166  | 0.387 | 0.018 | 3.96E-07    |
| CCL2        | 2.30E-11 | 1.979126246  | 0.376 | 0.018 | 5.01E-07    |
| PNP         | 3.01E-11 | 1.371084503  | 0.419 | 0.044 | 6.57E-07    |
| PDK4        | 1.36E-10 | -0.994287461 | 0.215 | 0.664 | 2.97E-06    |
| TM4SF1      | 1.92E-10 | 1.091587928  | 0.785 | 0.531 | 4.20E-06    |
| PHLDA1      | 2.30E-10 | 1.28033002   | 0.43  | 0.062 | 5.01E-06    |
| LINC00152   | 2.39E-10 | 1.436370948  | 0.43  | 0.062 | 5.22E-06    |
| HBB         | 2.53E-10 | -1.50295826  | 0     | 0.354 | 5.51E-06    |
| MYC         | 3.25E-10 | 1.333333242  | 0.419 | 0.053 | 7.08E-06    |
| DDIT4       | 3.45E-10 | -1.247681686 | 0.108 | 0.531 | 7.53E-06    |
| HSPA6       | 4.51E-10 | 1.898328346  | 0.301 | 0     | 9.83E-06    |
| DNAJB4      | 9.19E-10 | 1.320654822  | 0.366 | 0.035 | 2.00E-05    |
| ZFP36L1     | 1.58E-09 | -0.999958057 | 0.194 | 0.628 | 3.45E-05    |
| DNAJA1      | 1.93E-09 | 1.267466721  | 0.559 | 0.204 | 4.22E-05    |
| ID1         | 2.06E-09 | -0.862104972 | 0.28  | 0.717 | 4.48E-05    |
| DEFA3       | 3.01E-09 | -1.285609606 | 0.065 | 0.434 | 6.57E-05    |
| HSPA5       | 3.41E-09 | 1.203085465  | 0.677 | 0.336 | 7.44E-05    |
| SOX17       | 6.71E-09 | 1.326484443  | 0.366 | 0.053 | 0.000146325 |
| ICAM1       | 9.36E-09 | 1.336179498  | 0.441 | 0.115 | 0.000204044 |
| SDF2L1      | 9.47E-09 | 1.122898657  | 0.473 | 0.133 | 0.000206443 |

|          |          |              |       |       |             |
|----------|----------|--------------|-------|-------|-------------|
| IGLV2-14 | 1.44E-08 | -1.323993923 | 0.011 | 0.319 | 0.000315094 |
| PLIN2    | 1.99E-08 | 1.007230864  | 0.57  | 0.239 | 0.000434914 |
| DDX21    | 2.08E-08 | 1.266432288  | 0.269 | 0.009 | 0.000452542 |
| TCEB1    | 6.74E-08 | 1.010294111  | 0.505 | 0.177 | 0.001469002 |
| C11orf96 | 7.18E-08 | 1.054562353  | 0.29  | 0.027 | 0.001565747 |
| ATF3     | 1.25E-07 | 1.162782068  | 0.247 | 0.009 | 0.002717774 |
| DNAJB6   | 1.26E-07 | 1.014433135  | 0.495 | 0.177 | 0.00275761  |
| SOD2     | 2.33E-07 | 1.073186607  | 0.441 | 0.133 | 0.005084693 |
| CDC42EP2 | 2.66E-07 | 1.141395174  | 0.301 | 0.044 | 0.005804599 |
| NXT1     | 3.84E-07 | 1.093371905  | 0.247 | 0.018 | 0.008365824 |
| NAMPT    | 3.96E-07 | 0.811924596  | 0.613 | 0.336 | 0.008632464 |
| KLF6     | 4.53E-07 | 1.062087522  | 0.43  | 0.133 | 0.009868339 |
| ARID5A   | 4.84E-07 | 1.039498423  | 0.28  | 0.035 | 0.010558388 |
| ARPC5L   | 4.86E-07 | 0.903155315  | 0.419 | 0.124 | 0.010599942 |
| IL32     | 8.30E-07 | 1.135625221  | 0.419 | 0.133 | 0.018096783 |
| ADM      | 9.18E-07 | -0.886543508 | 0.183 | 0.504 | 0.020024385 |
| ZNF593   | 9.28E-07 | 0.990001656  | 0.323 | 0.062 | 0.020228489 |
| DLC1     | 9.93E-07 | 0.8848044    | 0.43  | 0.133 | 0.021648717 |
| MAFF     | 1.09E-06 | 0.859429341  | 0.194 | 0     | 0.023808722 |
| GIMAP7   | 1.51E-06 | -1.027095492 | 0.075 | 0.363 | 0.032996181 |
| CXCL2    | 1.59E-06 | 1.365547997  | 0.247 | 0.027 | 0.03467403  |
| CTSD     | 1.72E-06 | -0.535143158 | 0.806 | 0.929 | 0.0374038   |
| H3F3B    | 1.74E-06 | 0.722794289  | 0.796 | 0.611 | 0.037943131 |
| KDM6B    | 2.17E-06 | 0.985221283  | 0.204 | 0.009 | 0.047407919 |

List of differentially expressed genes of RBP7\_VEC in reperfusion stage (PR versus EP)

| gene     | p val    | avg logFC    | pct.1 | pct.2 | p val adj   |
|----------|----------|--------------|-------|-------|-------------|
| HSPA1A   | 9.37E-18 | 1.938733675  | 1     | 0.755 | 2.04E-13    |
| HSPA1B   | 3.54E-17 | 1.78428606   | 1     | 0.653 | 7.71E-13    |
| HSPB1    | 1.22E-15 | 1.531340971  | 1     | 0.959 | 2.67E-11    |
| HSPE1    | 1.17E-14 | 2.247955593  | 0.871 | 0.204 | 2.54E-10    |
| ID3      | 4.22E-12 | -1.220134323 | 0.643 | 0.939 | 9.20E-08    |
| HSPH1    | 4.37E-12 | 1.948343875  | 0.743 | 0.143 | 9.52E-08    |
| HSP90AA1 | 8.67E-12 | 1.399525975  | 0.957 | 0.857 | 1.89E-07    |
| BAG3     | 1.31E-11 | 1.614794524  | 0.857 | 0.327 | 2.85E-07    |
| PNP      | 5.25E-11 | 1.591809523  | 0.829 | 0.408 | 1.15E-06    |
| HSP90AB1 | 7.41E-11 | 0.911700238  | 0.986 | 0.898 | 1.62E-06    |
| DEFA3    | 2.92E-10 | -0.990122562 | 0     | 0.469 | 6.38E-06    |
| ARID5A   | 8.93E-10 | 1.219290721  | 0.657 | 0.102 | 1.95E-05    |
| ADAMTS4  | 5.17E-09 | 1.598389912  | 0.557 | 0.041 | 0.000112739 |
| AKAP12   | 9.08E-09 | 1.942078816  | 0.729 | 0.327 | 0.000198116 |
| HSPD1    | 1.26E-08 | 1.718164924  | 0.757 | 0.367 | 0.000273893 |
| HBB      | 2.69E-08 | -1.078002859 | 0.043 | 0.469 | 0.000587604 |
| MT2A     | 7.83E-08 | 2.052225974  | 0.957 | 0.878 | 0.001708043 |
| FOSL1    | 9.63E-08 | 0.982443594  | 0.471 | 0.02  | 0.002100706 |
| UPP1     | 1.11E-07 | 1.123205079  | 0.686 | 0.224 | 0.002409797 |
| TXNIP    | 1.47E-07 | -0.736905246 | 0.271 | 0.776 | 0.003208749 |
| ADAMTS9  | 1.65E-07 | 1.047128062  | 0.729 | 0.265 | 0.00359182  |
| POMP     | 1.73E-07 | 0.792609859  | 0.914 | 0.653 | 0.003763668 |
| RBM3     | 3.32E-07 | 0.961254477  | 0.7   | 0.306 | 0.007232482 |
| HSPA5    | 3.71E-07 | 1.363352615  | 0.814 | 0.49  | 0.008088288 |
| THBD     | 3.72E-07 | 1.001180928  | 0.9   | 0.551 | 0.008114964 |
| ENG      | 4.33E-07 | -0.808451785 | 0.843 | 0.98  | 0.00944386  |
| SLCO4A1  | 5.21E-07 | 1.103158839  | 0.6   | 0.143 | 0.011352435 |
| IGFBP4   | 5.29E-07 | -0.916966222 | 0.814 | 0.918 | 0.011545722 |
| TSC22D1  | 6.69E-07 | 1.038578008  | 0.886 | 0.592 | 0.014580336 |
| ANGPTL4  | 9.06E-07 | 0.924067111  | 0.557 | 0.102 | 0.019765757 |
| DNAJB1   | 9.45E-07 | 1.22499983   | 0.9   | 0.714 | 0.020614624 |
| TM4SF1   | 1.10E-06 | 0.716312971  | 0.971 | 0.939 | 0.023943336 |
| EMP1     | 1.44E-06 | 0.877351315  | 0.9   | 0.714 | 0.031498075 |
| PLAUR    | 1.54E-06 | 1.117384486  | 0.471 | 0.061 | 0.033580512 |
| MAFF     | 1.84E-06 | 0.900023937  | 0.571 | 0.143 | 0.040151065 |
| MRPL33   | 1.98E-06 | 0.846398564  | 0.8   | 0.551 | 0.043125624 |

List of differentially expressed genes of PTGDS VEC in reperfusion stage (PR versus EP)

| gene | p val    | avg logFC    | pct.1 | pct.2 | p val adj   |
|------|----------|--------------|-------|-------|-------------|
| KLF6 | 5.95E-07 | 2.42549057   | 1     | 0.357 | 0.012973573 |
| ENG  | 8.09E-07 | -0.871572935 | 0.96  | 1     | 0.017643471 |
| MCL1 | 1.96E-06 | 1.884311308  | 0.96  | 0.429 | 0.042805393 |

**Table 12: List of DEGs of endothelial cell clusters in overall stage (PR versus PP)**

| List of differentially expressed genes of CSTL LSEC in overall stage (PR versus PP) |          |              |       |       |           |
|-------------------------------------------------------------------------------------|----------|--------------|-------|-------|-----------|
| gene                                                                                | p_val    | avg_logFC    | pct.1 | pct.2 | p_val_adj |
| HSPD1                                                                               | 2.23E-40 | 2.185527129  | 0.983 | 0.49  | 4.85E-36  |
| HSP90AA1                                                                            | 3.91E-40 | 1.685568544  | 1     | 0.916 | 8.53E-36  |
| HSPE1                                                                               | 5.49E-39 | 1.929709606  | 0.974 | 0.455 | 1.20E-34  |
| HSPA1A                                                                              | 1.03E-34 | 1.59465481   | 1     | 0.867 | 2.25E-30  |
| ID3                                                                                 | 2.03E-34 | -1.52133684  | 0.573 | 0.979 | 4.44E-30  |
| HSP90AB1                                                                            | 2.52E-33 | 1.052024613  | 1     | 0.972 | 5.50E-29  |
| LITAF                                                                               | 3.81E-33 | 1.335206805  | 0.983 | 0.657 | 8.32E-29  |
| TM4SF1                                                                              | 1.17E-32 | 1.026595615  | 1     | 0.979 | 2.56E-28  |
| PLAUR                                                                               | 1.83E-32 | 1.3745449    | 0.795 | 0.098 | 3.99E-28  |
| PNP                                                                                 | 4.73E-31 | 1.33352835   | 0.889 | 0.35  | 1.03E-26  |
| EMP1                                                                                | 9.65E-31 | 1.46514152   | 0.906 | 0.28  | 2.11E-26  |
| HSPH1                                                                               | 1.66E-30 | 1.74780313   | 0.855 | 0.273 | 3.62E-26  |
| HSPA1B                                                                              | 3.45E-30 | 1.518793081  | 0.966 | 0.685 | 7.52E-26  |
| HSPB1                                                                               | 1.07E-28 | 1.503511164  | 0.991 | 0.916 | 2.34E-24  |
| ADAMTS4                                                                             | 8.40E-28 | 1.305991282  | 0.872 | 0.301 | 1.83E-23  |
| BAG3                                                                                | 1.01E-27 | 1.376685673  | 0.915 | 0.427 | 2.21E-23  |
| AKAP12                                                                              | 1.42E-27 | 1.016979489  | 1     | 0.958 | 3.09E-23  |
| DDX21                                                                               | 2.79E-26 | 1.159462904  | 0.863 | 0.455 | 6.09E-22  |
| FOSL1                                                                               | 4.49E-26 | 0.916021447  | 0.641 | 0.035 | 9.79E-22  |
| LMNA                                                                                | 8.14E-26 | 1.119978695  | 0.889 | 0.399 | 1.78E-21  |
| ZFP36L1                                                                             | 4.31E-25 | -0.928188178 | 0.701 | 0.965 | 9.39E-21  |
| ADAMTS9                                                                             | 9.13E-25 | 1.073453882  | 0.684 | 0.091 | 1.99E-20  |
| PHLDA1                                                                              | 3.17E-24 | 1.012735886  | 0.932 | 0.517 | 6.91E-20  |
| HES1                                                                                | 1.15E-23 | -1.174028391 | 0.239 | 0.839 | 2.50E-19  |
| TSC22D3                                                                             | 4.33E-23 | -0.805860258 | 0.65  | 0.958 | 9.45E-19  |
| HSPA5                                                                               | 8.73E-23 | 1.399817077  | 0.991 | 0.93  | 1.90E-18  |
| TSC22D4                                                                             | 1.30E-22 | -0.815271154 | 0.111 | 0.706 | 2.83E-18  |
| EVA1C                                                                               | 1.54E-22 | 0.95843567   | 0.778 | 0.266 | 3.35E-18  |
| PMP22                                                                               | 5.76E-22 | 1.031012566  | 0.957 | 0.692 | 1.26E-17  |
| MIR4435-2HG                                                                         | 7.04E-22 | 1.043445439  | 0.829 | 0.308 | 1.54E-17  |
| PLPP3                                                                               | 1.84E-21 | 0.713891014  | 1     | 0.944 | 4.01E-17  |
| PIM3                                                                                | 3.54E-21 | -0.863784895 | 0.205 | 0.797 | 7.72E-17  |
| MYADM                                                                               | 4.65E-21 | 0.937500118  | 0.906 | 0.552 | 1.01E-16  |
| THBD                                                                                | 4.86E-21 | 1.080241377  | 0.915 | 0.601 | 1.06E-16  |
| TIMP1                                                                               | 9.67E-21 | 0.634415361  | 1     | 1     | 2.11E-16  |
| HSPA8                                                                               | 1.34E-20 | 0.743228911  | 0.991 | 0.972 | 2.93E-16  |
| S1PR1                                                                               | 1.37E-20 | 0.764575857  | 0.966 | 0.825 | 2.98E-16  |
| SELK                                                                                | 1.92E-20 | 1.035097763  | 0.923 | 0.622 | 4.20E-16  |
| LDLR                                                                                | 3.20E-20 | 0.923452838  | 0.735 | 0.245 | 6.97E-16  |
| MARCKS                                                                              | 4.06E-20 | 0.700227776  | 0.949 | 0.748 | 8.85E-16  |
| NUAK1                                                                               | 6.62E-20 | -0.834007986 | 0.214 | 0.783 | 1.44E-15  |
| SDF2L1                                                                              | 1.36E-19 | 1.001302483  | 0.786 | 0.329 | 2.97E-15  |
| B4GALT5                                                                             | 2.09E-19 | 0.811518919  | 0.752 | 0.266 | 4.57E-15  |
| IGFBP4                                                                              | 7.29E-19 | -0.565194841 | 1     | 1     | 1.59E-14  |
| ATP13A3                                                                             | 1.03E-18 | 0.803091733  | 0.598 | 0.112 | 2.24E-14  |
| TNFRSF1A                                                                            | 1.28E-18 | 0.712204696  | 0.966 | 0.776 | 2.79E-14  |
| LINC00152                                                                           | 1.43E-18 | 0.963206737  | 0.761 | 0.336 | 3.11E-14  |
| LPAR6                                                                               | 2.09E-18 | -0.756736115 | 0.769 | 0.986 | 4.56E-14  |
| MESDC1                                                                              | 2.15E-18 | 0.827137903  | 0.718 | 0.252 | 4.68E-14  |
| RIN2                                                                                | 6.54E-18 | 0.898886107  | 0.718 | 0.273 | 1.43E-13  |
| ICAM1                                                                               | 1.31E-17 | 1.157515984  | 0.94  | 0.804 | 2.86E-13  |
| HYAL2                                                                               | 1.32E-17 | 0.812960047  | 0.957 | 0.881 | 2.87E-13  |
| GIMAP1                                                                              | 1.49E-17 | -0.71711802  | 0.444 | 0.909 | 3.25E-13  |
| MCL1                                                                                | 3.14E-17 | 0.696731141  | 0.974 | 0.839 | 6.85E-13  |
| STIP1                                                                               | 3.90E-17 | 0.621870142  | 0.564 | 0.105 | 8.50E-13  |
| MT2A                                                                                | 4.60E-17 | 1.441466125  | 0.974 | 0.909 | 1.00E-12  |
| PDLIM3                                                                              | 5.17E-17 | 0.832229491  | 0.726 | 0.287 | 1.13E-12  |
| SNHG15                                                                              | 5.26E-17 | 0.759757631  | 0.624 | 0.154 | 1.15E-12  |
| MCAM                                                                                | 6.34E-17 | 0.795375789  | 0.692 | 0.224 | 1.38E-12  |
| MYL6                                                                                | 9.56E-17 | 0.461888817  | 1     | 1     | 2.09E-12  |
| DNASE1L3                                                                            | 2.00E-16 | -0.355637827 | 1     | 1     | 4.36E-12  |
| EIF4A1                                                                              | 2.33E-16 | 0.657972267  | 0.88  | 0.643 | 5.08E-12  |
| SH3BGR13                                                                            | 3.27E-16 | 0.643506322  | 0.949 | 0.895 | 7.12E-12  |
| CYCS                                                                                | 3.87E-16 | 0.699884718  | 0.769 | 0.413 | 8.44E-12  |
| SPHK1                                                                               | 8.38E-16 | 0.668071946  | 0.41  | 0.014 | 1.83E-11  |
| HNRNPAB                                                                             | 1.18E-15 | 0.687927422  | 0.615 | 0.182 | 2.57E-11  |
| TNFRSF12A                                                                           | 1.43E-15 | 0.684425228  | 0.376 | 0     | 3.11E-11  |

|                |          |              |       |       |          |
|----------------|----------|--------------|-------|-------|----------|
| CD59           | 1.66E-15 | 0.52920652   | 0.991 | 0.993 | 3.62E-11 |
| NOP16          | 2.03E-15 | 0.670963119  | 0.487 | 0.063 | 4.42E-11 |
| TOMM5          | 3.56E-15 | 0.693812402  | 0.821 | 0.524 | 7.77E-11 |
| CNKSR3         | 3.81E-15 | 0.685602458  | 0.778 | 0.427 | 8.31E-11 |
| TRIB1          | 5.52E-15 | 0.748833362  | 0.803 | 0.399 | 1.20E-10 |
| JUNB           | 6.81E-15 | -0.613311168 | 0.957 | 0.986 | 1.48E-10 |
| DDIT4          | 7.85E-15 | -0.826668649 | 0.632 | 0.951 | 1.71E-10 |
| NOLC1          | 8.08E-15 | 0.668397276  | 0.675 | 0.245 | 1.76E-10 |
| ARID5A         | 9.08E-15 | 0.672026849  | 0.556 | 0.147 | 1.98E-10 |
| SEPP1          | 9.51E-15 | -0.42714606  | 1     | 1     | 2.07E-10 |
| PTPN1          | 1.33E-14 | 0.721033401  | 0.846 | 0.531 | 2.89E-10 |
| SAT1           | 1.41E-14 | 0.596477642  | 1     | 1     | 3.08E-10 |
| RPS29          | 1.57E-14 | 0.42347994   | 0.991 | 0.986 | 3.42E-10 |
| CDC42EP2       | 1.81E-14 | 0.73993546   | 0.607 | 0.189 | 3.96E-10 |
| ZYX            | 2.00E-14 | 0.631214874  | 0.855 | 0.566 | 4.36E-10 |
| CDC37          | 2.00E-14 | 0.549342114  | 1     | 0.937 | 4.37E-10 |
| IL32           | 2.16E-14 | 1.094273607  | 0.65  | 0.28  | 4.71E-10 |
| PLK3           | 2.36E-14 | 0.741638947  | 0.581 | 0.182 | 5.14E-10 |
| SBNO2          | 2.41E-14 | 0.571249753  | 0.59  | 0.175 | 5.25E-10 |
| BZW1           | 3.10E-14 | 0.633817503  | 0.829 | 0.629 | 6.77E-10 |
| CLIC1          | 4.05E-14 | 0.464038511  | 0.983 | 0.965 | 8.84E-10 |
| GPR4           | 7.23E-14 | 0.667156758  | 0.59  | 0.196 | 1.58E-09 |
| PLIN2          | 8.03E-14 | 0.676811844  | 0.974 | 0.818 | 1.75E-09 |
| HLA-DRB5       | 8.38E-14 | 0.693476884  | 0.94  | 0.825 | 1.83E-09 |
| PNPLA8         | 9.98E-14 | 0.663973975  | 0.641 | 0.266 | 2.18E-09 |
| INSIG1         | 1.00E-13 | 0.873668543  | 0.667 | 0.308 | 2.18E-09 |
| ENG            | 1.03E-13 | -0.454961468 | 1     | 1     | 2.25E-09 |
| IVNS1ABP       | 1.12E-13 | 0.686053699  | 0.718 | 0.364 | 2.45E-09 |
| DUSP6          | 1.22E-13 | 0.703945925  | 0.974 | 0.839 | 2.66E-09 |
| MYC            | 1.42E-13 | 0.687086609  | 0.949 | 0.734 | 3.09E-09 |
| ARPC5L         | 1.52E-13 | 0.595313003  | 0.778 | 0.434 | 3.32E-09 |
| EFNA1          | 1.84E-13 | -0.681891953 | 0.598 | 0.909 | 4.01E-09 |
| NME1           | 2.12E-13 | 0.489078164  | 0.41  | 0.042 | 4.63E-09 |
| STARD4         | 2.22E-13 | 0.58022429   | 0.453 | 0.07  | 4.83E-09 |
| EHD4           | 3.09E-13 | 0.615042195  | 0.684 | 0.329 | 6.74E-09 |
| NOP58          | 3.41E-13 | 0.659453442  | 0.675 | 0.364 | 7.44E-09 |
| ZNF593         | 4.23E-13 | 0.682249366  | 0.547 | 0.168 | 9.22E-09 |
| CLEC4G         | 6.05E-13 | -0.317741245 | 1     | 1     | 1.32E-08 |
| STX11          | 6.55E-13 | 0.488956207  | 0.342 | 0.014 | 1.43E-08 |
| SLC20A1        | 7.50E-13 | 0.742843661  | 0.624 | 0.266 | 1.64E-08 |
| MAT2A          | 9.03E-13 | 0.653368045  | 0.675 | 0.329 | 1.97E-08 |
| LRRC32         | 9.19E-13 | 0.707945107  | 0.632 | 0.287 | 2.00E-08 |
| PVRL2          | 9.22E-13 | 0.534420839  | 0.94  | 0.853 | 2.01E-08 |
| PDK4           | 9.69E-13 | -0.692296265 | 0.761 | 0.993 | 2.11E-08 |
| PSAP           | 1.23E-12 | -0.381242165 | 0.991 | 1     | 2.69E-08 |
| SRSF5          | 1.27E-12 | 0.631885467  | 0.94  | 0.762 | 2.77E-08 |
| DEFA3          | 1.38E-12 | -0.527524042 | 0.068 | 0.476 | 3.01E-08 |
| RASD1          | 1.49E-12 | 1.363213614  | 0.778 | 0.503 | 3.25E-08 |
| GIMAP8         | 1.68E-12 | -0.580084548 | 0.239 | 0.692 | 3.66E-08 |
| XBP1           | 1.86E-12 | 0.561408711  | 0.889 | 0.622 | 4.06E-08 |
| CD151          | 2.06E-12 | -0.433541522 | 0.906 | 1     | 4.48E-08 |
| PELO           | 2.37E-12 | 0.67387594   | 0.744 | 0.441 | 5.16E-08 |
| TUBA1C         | 2.59E-12 | 0.687097169  | 0.675 | 0.336 | 5.65E-08 |
| ACKR3          | 2.99E-12 | 0.683044751  | 0.496 | 0.112 | 6.52E-08 |
| DNAJA1         | 3.15E-12 | 0.619568761  | 0.923 | 0.79  | 6.87E-08 |
| RHOB           | 3.39E-12 | -0.702418014 | 0.803 | 0.958 | 7.39E-08 |
| PDLIM1         | 3.65E-12 | 0.482578309  | 0.983 | 0.979 | 7.97E-08 |
| RAP1B          | 3.97E-12 | 0.559728275  | 0.897 | 0.818 | 8.65E-08 |
| YWHAG          | 4.02E-12 | 0.558479185  | 0.564 | 0.21  | 8.76E-08 |
| RBM3           | 5.17E-12 | 0.511674833  | 0.932 | 0.853 | 1.13E-07 |
| UPP1           | 6.40E-12 | 0.631007015  | 0.923 | 0.727 | 1.40E-07 |
| PODXL          | 7.48E-12 | 0.611383937  | 0.47  | 0.112 | 1.63E-07 |
| UGCG           | 8.76E-12 | 0.625741945  | 0.932 | 0.839 | 1.91E-07 |
| OIT3           | 1.12E-11 | -0.393933005 | 1     | 1     | 2.45E-07 |
| DNAJB6         | 1.15E-11 | 0.712226599  | 0.821 | 0.629 | 2.50E-07 |
| RTKL1-TNFRSF6B | 1.21E-11 | 0.743263737  | 0.325 | 0.021 | 2.64E-07 |
| SPRY4          | 1.89E-11 | 0.634976763  | 0.726 | 0.455 | 4.12E-07 |
| SNU13          | 1.90E-11 | 0.606965036  | 0.838 | 0.678 | 4.15E-07 |
| CD9            | 2.19E-11 | 0.729364949  | 0.974 | 0.944 | 4.79E-07 |
| POMP           | 2.22E-11 | 0.489930255  | 0.966 | 0.881 | 4.85E-07 |



|          |          |              |       |       |          |
|----------|----------|--------------|-------|-------|----------|
| SDPR     | 2.34E-11 | -0.464333067 | 0.974 | 0.993 | 5.10E-07 |
| OAF      | 2.48E-11 | 0.44449401   | 0.333 | 0.028 | 5.42E-07 |
| RHOC     | 3.85E-11 | 0.435292289  | 0.966 | 0.93  | 8.39E-07 |
| GOLT1B   | 4.40E-11 | 0.52720921   | 0.504 | 0.168 | 9.59E-07 |
| EIF5A    | 5.17E-11 | 0.606178357  | 0.778 | 0.636 | 1.13E-06 |
| INPP1    | 5.35E-11 | 0.550243213  | 0.803 | 0.552 | 1.17E-06 |
| SLC12A7  | 5.53E-11 | 0.66714136   | 0.59  | 0.252 | 1.21E-06 |
| NCL      | 5.80E-11 | 0.578704355  | 0.889 | 0.769 | 1.27E-06 |
| ARL4D    | 5.85E-11 | -0.441768192 | 0.085 | 0.462 | 1.28E-06 |
| CCL14    | 5.90E-11 | -0.280681496 | 1     | 1     | 1.29E-06 |
| KDM6B    | 5.97E-11 | 0.69964841   | 0.624 | 0.315 | 1.30E-06 |
| PEA15    | 5.98E-11 | 0.584817769  | 0.735 | 0.441 | 1.30E-06 |
| TOP1     | 6.41E-11 | 0.560396177  | 0.803 | 0.573 | 1.40E-06 |
| DNMBP    | 6.53E-11 | 0.546544461  | 0.479 | 0.14  | 1.42E-06 |
| PDLIM5   | 7.00E-11 | 0.729100554  | 0.701 | 0.427 | 1.53E-06 |
| SNRPB    | 7.74E-11 | 0.485779055  | 0.838 | 0.629 | 1.69E-06 |
| RSRP1    | 7.78E-11 | -0.492851882 | 0.53  | 0.867 | 1.70E-06 |
| ID1      | 9.69E-11 | -0.558107059 | 0.872 | 0.986 | 2.11E-06 |
| BCL6B    | 1.01E-10 | 0.604537022  | 0.521 | 0.182 | 2.20E-06 |
| CLK4     | 1.14E-10 | -0.491321259 | 0.094 | 0.462 | 2.48E-06 |
| TFPI2    | 1.35E-10 | 0.885789459  | 0.906 | 0.874 | 2.94E-06 |
| MTFP1    | 1.43E-10 | 0.473603029  | 0.325 | 0.035 | 3.11E-06 |
| GIMAP4   | 1.46E-10 | -0.494138146 | 0.641 | 0.944 | 3.17E-06 |
| FLT1     | 1.58E-10 | 0.490996751  | 0.966 | 0.93  | 3.44E-06 |
| SMAD6    | 1.61E-10 | -0.50963093  | 0.06  | 0.406 | 3.51E-06 |
| TMSB10   | 1.65E-10 | 0.362215109  | 1     | 1     | 3.61E-06 |
| MALL     | 2.02E-10 | 0.598984858  | 0.35  | 0.049 | 4.41E-06 |
| UBE2D3   | 2.03E-10 | 0.429235045  | 0.983 | 0.937 | 4.42E-06 |
| ZFP36    | 2.43E-10 | -0.617488975 | 0.957 | 0.993 | 5.29E-06 |
| TIMM17A  | 2.60E-10 | 0.531309745  | 0.547 | 0.217 | 5.66E-06 |
| FOSL2    | 2.69E-10 | 0.547722365  | 0.641 | 0.308 | 5.86E-06 |
| HSPA6    | 2.75E-10 | 1.002345327  | 0.265 | 0.007 | 5.99E-06 |
| SSH1     | 2.78E-10 | 0.53204347   | 0.479 | 0.133 | 6.05E-06 |
| CEBPZ    | 3.05E-10 | 0.471127718  | 0.624 | 0.266 | 6.66E-06 |
| ACER3    | 3.20E-10 | 0.620494965  | 0.709 | 0.413 | 6.98E-06 |
| INSR     | 3.22E-10 | 0.634009316  | 0.65  | 0.385 | 7.01E-06 |
| YBX3     | 3.25E-10 | 0.535185702  | 0.709 | 0.427 | 7.08E-06 |
| YBX1     | 3.49E-10 | 0.430648377  | 0.957 | 0.916 | 7.61E-06 |
| INHBB    | 3.81E-10 | 0.476521216  | 0.333 | 0.042 | 8.31E-06 |
| TMEM140  | 4.11E-10 | -0.496144993 | 0.333 | 0.699 | 8.97E-06 |
| SOX17    | 5.08E-10 | 0.775445013  | 0.769 | 0.517 | 1.11E-05 |
| GJA4     | 5.38E-10 | 0.919426054  | 0.667 | 0.343 | 1.17E-05 |
| SRGN     | 5.39E-10 | 0.583340171  | 0.983 | 0.902 | 1.18E-05 |
| TEAD4    | 6.44E-10 | 0.586805174  | 0.632 | 0.329 | 1.40E-05 |
| DLC1     | 7.37E-10 | 0.527483708  | 0.983 | 0.881 | 1.61E-05 |
| NR2F2    | 8.49E-10 | -0.485656143 | 0.573 | 0.839 | 1.85E-05 |
| STAB2    | 8.49E-10 | -0.451592097 | 0.829 | 0.986 | 1.85E-05 |
| SPSB3    | 8.96E-10 | -0.415849582 | 0.205 | 0.58  | 1.95E-05 |
| GIMAP7   | 9.21E-10 | -0.569707833 | 0.359 | 0.72  | 2.01E-05 |
| CCT6A    | 9.80E-10 | 0.469353021  | 0.726 | 0.455 | 2.14E-05 |
| SOCS2    | 1.03E-09 | 0.512538038  | 0.88  | 0.79  | 2.24E-05 |
| DNAJB11  | 1.17E-09 | 0.864002315  | 0.692 | 0.51  | 2.55E-05 |
| HLA-DRB1 | 1.17E-09 | 0.45028536   | 1     | 0.972 | 2.56E-05 |
| SLCO4A1  | 1.32E-09 | 0.549604369  | 0.761 | 0.462 | 2.88E-05 |
| CD4      | 1.52E-09 | -0.370306109 | 0.983 | 1     | 3.31E-05 |
| ETF1     | 1.55E-09 | 0.537006869  | 0.581 | 0.252 | 3.39E-05 |
| MTSS1    | 1.62E-09 | 0.583951132  | 0.684 | 0.392 | 3.54E-05 |
| GATA4    | 1.74E-09 | -0.482584572 | 0.188 | 0.566 | 3.80E-05 |
| PRCP     | 2.31E-09 | -0.358957922 | 0.966 | 1     | 5.04E-05 |
| KRBOX4   | 2.35E-09 | -0.375678521 | 0.085 | 0.427 | 5.13E-05 |
| HSP90B1  | 2.38E-09 | 0.532359326  | 1     | 1     | 5.19E-05 |
| SLC40A1  | 2.66E-09 | -0.424498257 | 0.863 | 0.965 | 5.81E-05 |
| STOM     | 2.72E-09 | 0.38985722   | 0.983 | 0.986 | 5.92E-05 |
| NUDC     | 3.02E-09 | 0.471146176  | 0.692 | 0.441 | 6.58E-05 |
| R3HDM4   | 3.11E-09 | 0.46439423   | 0.402 | 0.105 | 6.79E-05 |
| DNAJA4   | 3.26E-09 | 0.409161521  | 0.308 | 0.042 | 7.10E-05 |
| TCEB1    | 3.34E-09 | 0.517544062  | 0.88  | 0.79  | 7.28E-05 |
| FOXN2    | 3.41E-09 | -0.373144001 | 0.068 | 0.399 | 7.44E-05 |
| ANGPTL4  | 3.79E-09 | 0.790896336  | 0.607 | 0.301 | 8.26E-05 |
| ID2      | 3.88E-09 | -0.569293282 | 0.581 | 0.881 | 8.46E-05 |

|          |          |              |       |       |             |
|----------|----------|--------------|-------|-------|-------------|
| RHEB     | 3.88E-09 | 0.455915792  | 0.726 | 0.497 | 8.47E-05    |
| ITM2B    | 4.27E-09 | -0.289382527 | 1     | 1     | 9.32E-05    |
| ENO1     | 4.43E-09 | 0.438504101  | 0.821 | 0.678 | 9.66E-05    |
| GNL3     | 4.69E-09 | 0.424484665  | 0.359 | 0.077 | 0.000102346 |
| NAMPT    | 4.85E-09 | 0.414380654  | 0.966 | 0.93  | 0.000105805 |
| AHSA1    | 4.95E-09 | 0.525562206  | 0.504 | 0.203 | 0.00010795  |
| RAN      | 5.21E-09 | 0.578621054  | 0.761 | 0.657 | 0.000113699 |
| TSPAN7   | 5.65E-09 | -0.32793334  | 0.983 | 0.993 | 0.000123166 |
| MANF     | 5.71E-09 | 0.714603866  | 0.701 | 0.483 | 0.000124493 |
| ABCE1    | 5.85E-09 | 0.41459755   | 0.427 | 0.133 | 0.00012762  |
| NOTCH4   | 5.90E-09 | -0.39861917  | 0.487 | 0.839 | 0.000128707 |
| TMEM37   | 6.54E-09 | -0.524197056 | 0.598 | 0.867 | 0.00014257  |
| SNX5     | 6.54E-09 | -0.407994775 | 0.846 | 0.965 | 0.000142612 |
| PGK1     | 6.68E-09 | 0.492085185  | 0.855 | 0.699 | 0.000145681 |
| GABARAP  | 6.72E-09 | -0.297772774 | 0.974 | 0.986 | 0.000146465 |
| PFDN2    | 6.77E-09 | 0.59702919   | 0.735 | 0.58  | 0.000147536 |
| SYDE1    | 7.02E-09 | -0.36073069  | 0.051 | 0.35  | 0.00015316  |
| FAM110B  | 7.17E-09 | -0.391894482 | 0.068 | 0.378 | 0.000156381 |
| PHC2     | 7.32E-09 | 0.416040895  | 0.496 | 0.196 | 0.00015965  |
| KLF6     | 7.39E-09 | 0.498809644  | 0.966 | 0.923 | 0.000161146 |
| UAP1     | 8.19E-09 | 0.423641842  | 0.436 | 0.14  | 0.000178593 |
| CCT2     | 8.54E-09 | 0.585736388  | 0.624 | 0.357 | 0.000186248 |
| CHKA     | 8.83E-09 | -0.391773972 | 0.145 | 0.503 | 0.000192492 |
| VIMP     | 9.38E-09 | 0.517532914  | 0.829 | 0.706 | 0.000204548 |
| MIS18BP1 | 1.02E-08 | -0.356053874 | 0.179 | 0.545 | 0.000222587 |
| PDCD4    | 1.02E-08 | -0.520168656 | 0.521 | 0.832 | 0.000223089 |
| PPRC1    | 1.03E-08 | 0.445747344  | 0.359 | 0.091 | 0.000225394 |
| PTGES3   | 1.05E-08 | 0.49163997   | 0.906 | 0.909 | 0.000229335 |
| AP2M1    | 1.15E-08 | -0.390393731 | 0.786 | 0.951 | 0.000250725 |
| BCL2L1   | 1.16E-08 | 0.529965292  | 0.59  | 0.329 | 0.00025254  |
| STX12    | 1.20E-08 | 0.496138075  | 0.675 | 0.413 | 0.000261324 |
| ADAMTS1  | 1.28E-08 | 0.644087292  | 0.838 | 0.566 | 0.00028022  |
| KLF9     | 1.30E-08 | 0.48147782   | 0.786 | 0.622 | 0.000282445 |
| NXT1     | 1.31E-08 | 0.410870517  | 0.598 | 0.329 | 0.000285819 |
| NDRG1    | 1.32E-08 | 0.573166981  | 0.496 | 0.217 | 0.000288182 |
| FOS      | 1.38E-08 | -0.517382083 | 0.991 | 0.986 | 0.000300665 |
| ZFAND2A  | 1.42E-08 | 0.821723553  | 0.521 | 0.245 | 0.00030877  |
| RASIP1   | 1.46E-08 | 0.455045991  | 0.641 | 0.336 | 0.000318993 |
| ETS1     | 1.50E-08 | 0.421551536  | 0.812 | 0.552 | 0.00032688  |
| LRRC8C   | 1.50E-08 | 0.408227053  | 0.453 | 0.161 | 0.000327505 |
| ZMYM6NB  | 1.56E-08 | -0.413351826 | 0.393 | 0.741 | 0.000340938 |
| CIRBP    | 1.62E-08 | -0.326874003 | 0.897 | 0.965 | 0.000352731 |
| KIAA1551 | 1.63E-08 | -0.455632262 | 0.231 | 0.573 | 0.000354897 |
| CHIC2    | 1.74E-08 | 0.584012562  | 0.778 | 0.622 | 0.000379503 |
| ABL2     | 1.89E-08 | 0.517621115  | 0.368 | 0.098 | 0.000412112 |
| DDX5     | 2.11E-08 | 0.378554741  | 0.991 | 0.972 | 0.000459197 |
| DNAJB1   | 2.15E-08 | 0.686117196  | 0.915 | 0.888 | 0.00046952  |
| LUCAT1   | 2.25E-08 | 0.411388395  | 0.248 | 0.021 | 0.000489719 |
| CTSD     | 2.32E-08 | -0.347227536 | 1     | 1     | 0.000505288 |
| HBB      | 2.42E-08 | -0.436282984 | 0.128 | 0.455 | 0.000527784 |
| RENBP    | 2.76E-08 | -0.425206451 | 0.325 | 0.678 | 0.00060141  |
| ACP5     | 2.82E-08 | -0.351753889 | 1     | 1     | 0.0006141   |
| PLSCR1   | 2.90E-08 | 0.386192973  | 0.915 | 0.804 | 0.000633479 |
| DNAJC19  | 3.10E-08 | -0.38984338  | 0.12  | 0.441 | 0.000676103 |
| CLDN5    | 3.22E-08 | -0.497661993 | 0.915 | 0.958 | 0.000701885 |
| APC      | 3.28E-08 | -0.323449369 | 0.094 | 0.413 | 0.000714755 |
| ARHGAP12 | 3.41E-08 | -0.361138339 | 0.094 | 0.399 | 0.00074397  |
| CDKN1B   | 3.47E-08 | -0.46707349  | 0.35  | 0.657 | 0.000757511 |
| WDR43    | 3.82E-08 | 0.461934015  | 0.376 | 0.105 | 0.000833794 |
| SLC25A37 | 3.98E-08 | 0.529432411  | 0.718 | 0.559 | 0.000867033 |
| TOB1     | 4.01E-08 | -0.320207433 | 0.051 | 0.329 | 0.000875174 |
| RELB     | 4.03E-08 | 0.498350199  | 0.402 | 0.133 | 0.000878033 |
| CTSA     | 4.10E-08 | -0.38668896  | 0.906 | 0.979 | 0.000893416 |
| SERPINB9 | 4.50E-08 | 0.525138819  | 0.658 | 0.434 | 0.000981658 |
| FAM60A   | 4.65E-08 | 0.440271952  | 0.368 | 0.105 | 0.001014819 |
| UBE2N    | 4.83E-08 | 0.458857101  | 0.65  | 0.392 | 0.001053581 |
| MEIS2    | 4.89E-08 | -0.424432089 | 0.419 | 0.762 | 0.001065912 |
| BAZ1A    | 5.81E-08 | 0.49335591   | 0.667 | 0.392 | 0.001266807 |
| RAMP3    | 5.88E-08 | -0.333364465 | 1     | 1     | 0.001282542 |
| RHPN2    | 6.08E-08 | -0.291359445 | 0.026 | 0.28  | 0.001326989 |

|             |          |              |       |       |             |
|-------------|----------|--------------|-------|-------|-------------|
| EPHX1       | 6.15E-08 | -0.41533546  | 0.444 | 0.769 | 0.001341571 |
| SERPINB1    | 6.46E-08 | 0.566303456  | 0.957 | 0.888 | 0.001408882 |
| TSSC4       | 7.48E-08 | 0.47582652   | 0.462 | 0.182 | 0.001631902 |
| CREM        | 7.77E-08 | 0.580409111  | 0.487 | 0.21  | 0.001693598 |
| LATS2       | 8.06E-08 | 0.391617219  | 0.444 | 0.147 | 0.00175765  |
| PNO1        | 8.43E-08 | 0.342697303  | 0.333 | 0.077 | 0.00183847  |
| RASSF1      | 8.51E-08 | 0.442730991  | 0.607 | 0.322 | 0.001855002 |
| IMP3        | 9.34E-08 | -0.373589684 | 0.231 | 0.559 | 0.002035797 |
| GSPT1       | 9.67E-08 | 0.478007041  | 0.419 | 0.161 | 0.002109566 |
| ADRM1       | 1.09E-07 | 0.44452932   | 0.812 | 0.573 | 0.002383643 |
| ZNF765      | 1.10E-07 | -0.422796872 | 0.256 | 0.594 | 0.002395326 |
| NUPR1       | 1.12E-07 | -0.436460112 | 0.615 | 0.853 | 0.002444021 |
| SNRPD1      | 1.13E-07 | 0.441139892  | 0.624 | 0.371 | 0.002459436 |
| MT1X        | 1.19E-07 | 0.996335043  | 0.684 | 0.455 | 0.002591671 |
| IL1RL1      | 1.25E-07 | 0.926355946  | 0.299 | 0.063 | 0.002717727 |
| IQCJ-SCHIP1 | 1.34E-07 | 0.360062917  | 0.282 | 0.049 | 0.002929982 |
| PHLDB1      | 1.35E-07 | 0.37405311   | 0.41  | 0.133 | 0.002937587 |
| KCNH7       | 1.37E-07 | -0.35821061  | 0.179 | 0.51  | 0.002983883 |
| LUZP1       | 1.37E-07 | 0.490695127  | 0.53  | 0.294 | 0.002986844 |
| TPM3        | 1.46E-07 | 0.340332764  | 0.88  | 0.825 | 0.003189863 |
| MAFF        | 1.55E-07 | 0.492436499  | 0.564 | 0.259 | 0.003375486 |
| TUBB6       | 1.59E-07 | 0.46334636   | 0.615 | 0.413 | 0.003457414 |
| PAG1        | 1.63E-07 | 0.335709199  | 0.291 | 0.056 | 0.003544983 |
| DOT1L       | 1.69E-07 | 0.316152276  | 0.239 | 0.028 | 0.003691279 |
| GATA3       | 1.70E-07 | -0.320174155 | 0.094 | 0.399 | 0.003710172 |
| ELF1        | 1.72E-07 | 0.436623336  | 0.769 | 0.622 | 0.003760872 |
| CXCL8       | 1.74E-07 | 0.734076533  | 0.444 | 0.168 | 0.003797984 |
| AQP3        | 1.77E-07 | 0.599049222  | 0.496 | 0.252 | 0.003855039 |
| ID11        | 1.77E-07 | 0.4553994    | 0.675 | 0.455 | 0.003860072 |
| FCGRT       | 1.79E-07 | -0.281594997 | 0.991 | 0.986 | 0.00389895  |
| MIR22HG     | 1.80E-07 | 0.42792833   | 0.573 | 0.294 | 0.003929816 |
| GRN         | 1.88E-07 | -0.34140386  | 0.974 | 0.993 | 0.004095421 |
| PSMB8       | 1.89E-07 | -0.370204685 | 0.436 | 0.783 | 0.004125913 |
| SFPQ        | 2.11E-07 | 0.391755424  | 0.88  | 0.755 | 0.00459951  |
| TNFSF10     | 2.31E-07 | -0.411166559 | 0.444 | 0.762 | 0.005033504 |
| PIK3C2A     | 2.60E-07 | 0.409081929  | 0.752 | 0.545 | 0.005675665 |
| AKAP2       | 2.62E-07 | 0.430878005  | 0.59  | 0.336 | 0.005708921 |
| ZCCHC24     | 2.69E-07 | -0.326918837 | 0.094 | 0.371 | 0.005869676 |
| GJA1        | 2.82E-07 | 0.356868292  | 0.205 | 0.014 | 0.006159955 |
| G0S2        | 2.92E-07 | 0.383429038  | 0.171 | 0     | 0.00635736  |
| MAP2K3      | 3.06E-07 | 0.454766111  | 0.479 | 0.203 | 0.006663375 |
| SNRPG       | 3.08E-07 | 0.407921144  | 0.786 | 0.594 | 0.006719553 |
| TNFRSF10B   | 3.10E-07 | 0.446042149  | 0.547 | 0.273 | 0.006760964 |
| FOSB        | 3.13E-07 | -0.646519723 | 0.778 | 0.881 | 0.006817569 |
| ANKRD26     | 3.15E-07 | -0.280200976 | 0.017 | 0.238 | 0.006862276 |
| EDN1        | 3.17E-07 | -0.70866552  | 0.291 | 0.608 | 0.006912872 |
| GIMAP5      | 3.36E-07 | -0.441791216 | 0.538 | 0.804 | 0.007334549 |
| SLC30A7     | 3.40E-07 | 0.439952346  | 0.556 | 0.28  | 0.007425015 |
| B3GNT5      | 3.42E-07 | 0.33920567   | 0.231 | 0.028 | 0.007460979 |
| OLFM1       | 3.50E-07 | -0.651462953 | 0.521 | 0.79  | 0.007631956 |
| ITPR1       | 3.52E-07 | 0.420287235  | 0.521 | 0.245 | 0.007685517 |
| SOD2        | 3.62E-07 | 0.712569577  | 0.821 | 0.678 | 0.007885827 |
| CSF1        | 3.76E-07 | -0.358316313 | 0.504 | 0.797 | 0.008195637 |
| RAB20       | 3.97E-07 | -0.388129735 | 0.444 | 0.734 | 0.008662937 |
| MAF         | 4.00E-07 | -0.351625407 | 0.855 | 0.972 | 0.008722998 |
| MRPL45      | 4.02E-07 | -0.377695978 | 0.188 | 0.49  | 0.008767015 |
| ERP29       | 4.19E-07 | -0.328796901 | 0.769 | 0.937 | 0.009130901 |
| ARID5B      | 4.23E-07 | 0.43651607   | 0.487 | 0.217 | 0.009227558 |
| HSPA9       | 4.26E-07 | 0.471094045  | 0.53  | 0.28  | 0.009295457 |
| SERPINB8    | 4.34E-07 | 0.361348778  | 0.359 | 0.112 | 0.009461615 |
| HERC2       | 4.57E-07 | -0.356418041 | 0.12  | 0.406 | 0.009956225 |
| GADD45A     | 4.83E-07 | 0.395249693  | 0.393 | 0.126 | 0.010523045 |
| FGR         | 5.08E-07 | 0.330738771  | 0.256 | 0.042 | 0.011074468 |
| HSPG2       | 5.10E-07 | -0.38314901  | 0.855 | 0.951 | 0.011131076 |
| SERPINE1    | 5.14E-07 | 0.533889932  | 0.453 | 0.203 | 0.011217991 |
| C8orf4      | 5.26E-07 | 0.521174703  | 0.897 | 0.741 | 0.01147719  |
| GRPEL1      | 5.36E-07 | 0.449989414  | 0.47  | 0.231 | 0.011685582 |
| VCAM1       | 5.44E-07 | 0.778026712  | 0.444 | 0.196 | 0.011865251 |
| CTSB        | 5.47E-07 | -0.277764256 | 0.94  | 0.986 | 0.011939066 |
| SDE2        | 5.81E-07 | 0.309184407  | 0.325 | 0.084 | 0.012675062 |

|          |          |              |       |       |             |
|----------|----------|--------------|-------|-------|-------------|
| HNRNPDL  | 6.09E-07 | 0.367106424  | 0.872 | 0.762 | 0.013290826 |
| NFE2L2   | 6.19E-07 | 0.42453991   | 0.735 | 0.524 | 0.013509921 |
| PTPN12   | 6.33E-07 | 0.435306808  | 0.65  | 0.455 | 0.013804463 |
| IP6K2    | 6.56E-07 | -0.309241004 | 0.085 | 0.336 | 0.014313947 |
| GCC2     | 6.64E-07 | -0.367115357 | 0.282 | 0.608 | 0.014486594 |
| MERTK    | 6.69E-07 | -0.330810986 | 0.231 | 0.566 | 0.014589986 |
| EIF2S1   | 6.86E-07 | 0.376078818  | 0.496 | 0.238 | 0.014967841 |
| MAT2B    | 6.94E-07 | -0.369712217 | 0.231 | 0.538 | 0.015123898 |
| SOX18    | 7.15E-07 | -0.369220033 | 0.154 | 0.434 | 0.015584119 |
| CDK11B   | 7.40E-07 | 0.394651558  | 0.402 | 0.147 | 0.01614399  |
| PML      | 7.82E-07 | -0.349766203 | 0.197 | 0.497 | 0.017047588 |
| CHD9     | 7.93E-07 | -0.441252704 | 0.308 | 0.622 | 0.017285407 |
| CNTNAP3B | 8.06E-07 | -0.370465735 | 0.188 | 0.51  | 0.017573672 |
| MRC1     | 8.36E-07 | -0.33028082  | 0.957 | 1     | 0.018234233 |
| SHE      | 8.63E-07 | -0.308666708 | 0.205 | 0.517 | 0.018814378 |
| GTPBP4   | 8.99E-07 | 0.340791439  | 0.368 | 0.126 | 0.019607799 |
| PNPLA2   | 9.11E-07 | -0.321057118 | 0.846 | 0.972 | 0.019864621 |
| NRROS    | 9.15E-07 | -0.318081383 | 0.179 | 0.476 | 0.019946404 |
| MT-CO3   | 9.26E-07 | -0.262095599 | 1     | 1     | 0.020185389 |
| LYPLAL1  | 9.35E-07 | -0.313945652 | 0.188 | 0.476 | 0.020381971 |
| TUBB     | 9.72E-07 | -0.362378313 | 0.624 | 0.811 | 0.021193078 |
| GIMAP2   | 9.94E-07 | -0.383848222 | 0.274 | 0.573 | 0.021682271 |
| MT-CYB   | 1.01E-06 | -0.349436129 | 1     | 0.993 | 0.022054503 |
| PISD     | 1.01E-06 | 0.302604522  | 0.291 | 0.07  | 0.02205816  |
| GCH1     | 1.02E-06 | 0.256912463  | 0.256 | 0.042 | 0.022208649 |
| BLCAP    | 1.04E-06 | -0.386845195 | 0.41  | 0.748 | 0.022583322 |
| PCYOX1   | 1.04E-06 | -0.36989512  | 0.171 | 0.462 | 0.022665636 |
| SMAD7    | 1.15E-06 | -0.311196166 | 0.051 | 0.287 | 0.02499442  |
| SLC44A2  | 1.19E-06 | -0.390698803 | 0.547 | 0.811 | 0.025870199 |
| HNRNPU   | 1.20E-06 | 0.486043625  | 0.829 | 0.72  | 0.026184649 |
| NFKB2    | 1.21E-06 | 0.420390726  | 0.35  | 0.112 | 0.026297109 |
| PCMTD1   | 1.22E-06 | -0.349300236 | 0.41  | 0.72  | 0.026663102 |
| RBM17    | 1.25E-06 | 0.380734272  | 0.65  | 0.49  | 0.027208378 |
| ACACB    | 1.25E-06 | -0.294392732 | 0.068 | 0.315 | 0.027297561 |
| RAB8A    | 1.26E-06 | -0.285346083 | 0.137 | 0.427 | 0.027539763 |
| IGLV2-23 | 1.27E-06 | 0.252836025  | 0.205 | 0.021 | 0.027786488 |
| HES4     | 1.31E-06 | 0.345604045  | 0.171 | 0.007 | 0.028606769 |
| FAM102A  | 1.32E-06 | -0.397293445 | 0.402 | 0.685 | 0.028691544 |
| SH3BP5   | 1.34E-06 | 0.396615044  | 0.872 | 0.804 | 0.029296399 |
| LIMD2    | 1.35E-06 | -0.302978784 | 0.197 | 0.503 | 0.029459741 |
| PLXNA2   | 1.36E-06 | 0.31557767   | 0.333 | 0.098 | 0.029658359 |
| VAT1     | 1.39E-06 | -0.360633563 | 0.632 | 0.804 | 0.030238993 |
| RPL36A   | 1.42E-06 | 0.322763023  | 0.974 | 0.972 | 0.030942947 |
| ETS2     | 1.46E-06 | 0.380538225  | 0.923 | 0.895 | 0.031826057 |
| KDM7A    | 1.46E-06 | -0.318385424 | 0.094 | 0.35  | 0.031852976 |
| MIDN     | 1.48E-06 | 0.433535174  | 0.744 | 0.58  | 0.032302076 |
| CHMP4B   | 1.51E-06 | 0.388514566  | 0.419 | 0.175 | 0.032970216 |
| SLC9A3R2 | 1.56E-06 | 0.710794704  | 0.744 | 0.622 | 0.03411566  |
| BIRC3    | 1.57E-06 | 0.308616822  | 0.214 | 0.028 | 0.034328528 |
| MTHFD2   | 1.60E-06 | 0.39297266   | 0.376 | 0.14  | 0.034857961 |
| PVR      | 1.65E-06 | 0.33278918   | 0.376 | 0.147 | 0.035995822 |
| BCL3     | 1.66E-06 | 0.402868726  | 0.462 | 0.224 | 0.03620188  |
| BCAR1    | 1.76E-06 | 0.344663986  | 0.419 | 0.182 | 0.038371899 |
| KLF2     | 1.98E-06 | -0.381434113 | 0.402 | 0.671 | 0.043129751 |
| SSSCA1   | 1.99E-06 | 0.347346044  | 0.385 | 0.147 | 0.043340716 |
| C10orf10 | 2.03E-06 | -0.450486689 | 0.077 | 0.322 | 0.044350613 |
| EGLN2    | 2.03E-06 | -0.335399013 | 0.282 | 0.601 | 0.044353086 |
| KPNA4    | 2.13E-06 | 0.406750758  | 0.47  | 0.259 | 0.046348733 |
| CRHBP    | 2.14E-06 | -0.414277835 | 0.983 | 1     | 0.046745164 |
| VMP1     | 2.15E-06 | 0.356946332  | 0.684 | 0.469 | 0.046801489 |
| HNRNPK   | 2.17E-06 | 0.281849123  | 0.949 | 0.937 | 0.047410017 |
| TTC3     | 2.20E-06 | -0.347913378 | 0.462 | 0.755 | 0.047900442 |
| CLCN3    | 2.21E-06 | -0.322433556 | 0.171 | 0.476 | 0.048300686 |
| IFI44    | 2.22E-06 | -0.279455055 | 0.145 | 0.427 | 0.048369804 |
| JUND     | 2.29E-06 | 0.468667693  | 0.726 | 0.573 | 0.049904919 |

| gene        | p val    | avg logFC    | pct.1 | pct.2 | p val adj |
|-------------|----------|--------------|-------|-------|-----------|
| HSPD1       | 8.30E-35 | 2.088918941  | 0.99  | 0.535 | 1.81E-30  |
| ADAMTS9     | 4.00E-33 | 1.529633205  | 0.88  | 0.101 | 8.73E-29  |
| HSPA1A      | 5.44E-33 | 1.701666716  | 1     | 0.884 | 1.19E-28  |
| HSP90AA1    | 3.77E-32 | 1.659353872  | 0.98  | 0.922 | 8.22E-28  |
| HSPE1       | 2.69E-31 | 2.105965238  | 0.96  | 0.496 | 5.86E-27  |
| HSPH1       | 2.99E-31 | 1.952183816  | 0.89  | 0.225 | 6.52E-27  |
| HSPB1       | 3.96E-31 | 1.709702836  | 1     | 0.868 | 8.64E-27  |
| EMP1        | 4.75E-31 | 1.623407625  | 0.99  | 0.55  | 1.04E-26  |
| PNP         | 1.03E-29 | 1.52550922   | 0.93  | 0.395 | 2.25E-25  |
| BAG3        | 1.50E-29 | 1.636761548  | 0.97  | 0.465 | 3.28E-25  |
| HSPA1B      | 6.85E-29 | 1.650980732  | 0.96  | 0.729 | 1.49E-24  |
| PLAUR       | 8.71E-29 | 1.520651388  | 0.85  | 0.147 | 1.90E-24  |
| LITAF       | 2.04E-28 | 1.374793337  | 0.96  | 0.628 | 4.45E-24  |
| ID3         | 5.21E-27 | -1.417857435 | 0.63  | 0.992 | 1.14E-22  |
| HSP90AB1    | 5.46E-26 | 1.058778403  | 1     | 0.961 | 1.19E-21  |
| FOSL1       | 1.07E-25 | 1.282197406  | 0.7   | 0.054 | 2.32E-21  |
| AKAP12      | 3.06E-25 | 1.090210945  | 0.99  | 0.915 | 6.67E-21  |
| TNFRSF12A   | 3.03E-24 | 1.09075813   | 0.63  | 0.016 | 6.60E-20  |
| TM4SF1      | 3.03E-23 | 0.821864192  | 1     | 1     | 6.60E-19  |
| LMNA        | 9.86E-23 | 1.199990045  | 0.93  | 0.651 | 2.15E-18  |
| DDX21       | 5.60E-22 | 1.089382441  | 0.87  | 0.45  | 1.22E-17  |
| MYADM       | 2.09E-20 | 1.242340957  | 0.89  | 0.55  | 4.55E-16  |
| TSC22D3     | 4.28E-20 | -0.94468095  | 0.64  | 0.961 | 9.33E-16  |
| CDC42EP2    | 5.31E-20 | 0.947536964  | 0.75  | 0.194 | 1.16E-15  |
| SRSF5       | 5.42E-20 | 0.776035377  | 0.98  | 0.822 | 1.18E-15  |
| THBD        | 5.77E-20 | 1.065172435  | 0.97  | 0.566 | 1.26E-15  |
| CD59        | 7.08E-20 | 0.668518593  | 1     | 0.953 | 1.54E-15  |
| SELK        | 9.46E-20 | 1.050419888  | 0.89  | 0.612 | 2.06E-15  |
| POMP        | 1.04E-19 | 0.739871385  | 0.97  | 0.868 | 2.26E-15  |
| MIR4435-2HG | 2.40E-19 | 1.252639044  | 0.83  | 0.333 | 5.24E-15  |
| ADAMTS4     | 3.48E-19 | 1.170986798  | 0.88  | 0.388 | 7.60E-15  |
| DDIT4       | 3.75E-18 | -1.091530192 | 0.75  | 0.984 | 8.19E-14  |
| ZFP36L1     | 5.60E-18 | -0.858954967 | 0.75  | 0.969 | 1.22E-13  |
| RHOB        | 6.41E-18 | -1.020748978 | 0.8   | 0.977 | 1.40E-13  |
| HES1        | 3.26E-17 | -1.068574934 | 0.35  | 0.829 | 7.11E-13  |
| LINC00152   | 3.29E-17 | 1.0969507    | 0.78  | 0.31  | 7.18E-13  |
| LDLR        | 3.36E-17 | 0.896498267  | 0.75  | 0.264 | 7.33E-13  |
| SH3BGRL3    | 5.10E-17 | 0.77162606   | 0.97  | 0.884 | 1.11E-12  |
| RIN2        | 8.82E-17 | 0.896453626  | 0.74  | 0.287 | 1.92E-12  |
| CYR61       | 1.15E-16 | 1.132462739  | 0.62  | 0.116 | 2.52E-12  |
| EFNA1       | 1.16E-16 | -0.872920581 | 0.57  | 0.93  | 2.53E-12  |
| UPP1        | 1.27E-16 | 0.872297287  | 0.9   | 0.659 | 2.76E-12  |
| CD9         | 2.01E-16 | 0.906980196  | 0.99  | 0.953 | 4.38E-12  |
| INSIG1      | 2.91E-16 | 1.112151068  | 0.78  | 0.326 | 6.34E-12  |
| PMP22       | 4.93E-16 | 1.078382242  | 0.85  | 0.558 | 1.08E-11  |
| GIMAP8      | 4.98E-16 | -0.775493751 | 0.22  | 0.76  | 1.08E-11  |
| GIMAP4      | 6.29E-16 | -0.776901899 | 0.57  | 0.899 | 1.37E-11  |
| GIMAP1      | 7.31E-16 | -0.852014027 | 0.39  | 0.814 | 1.59E-11  |
| CHIC2       | 7.74E-16 | 0.846549735  | 0.85  | 0.527 | 1.69E-11  |
| DEFA3       | 9.36E-16 | -0.692473095 | 0.03  | 0.543 | 2.04E-11  |
| RBM3        | 1.06E-15 | 0.784950239  | 0.94  | 0.721 | 2.31E-11  |
| MAT2A       | 1.13E-15 | 0.850041712  | 0.83  | 0.434 | 2.47E-11  |
| NOP16       | 1.32E-15 | 0.659586168  | 0.5   | 0.047 | 2.88E-11  |
| HES4        | 2.54E-15 | 1.015926429  | 0.5   | 0.054 | 5.53E-11  |
| DNAJA4      | 2.95E-15 | 0.791480647  | 0.45  | 0.023 | 6.43E-11  |
| RASD1       | 3.01E-15 | 1.567852607  | 0.78  | 0.419 | 6.56E-11  |
| CYCS        | 4.72E-15 | 0.781044451  | 0.77  | 0.364 | 1.03E-10  |
| DLC1        | 5.46E-15 | 0.69947979   | 0.93  | 0.853 | 1.19E-10  |
| TIMP1       | 6.00E-15 | 0.946778324  | 1     | 0.992 | 1.31E-10  |
| SLC40A1     | 6.52E-15 | -0.796013838 | 0.48  | 0.86  | 1.42E-10  |
| JUNB        | 7.03E-15 | -0.599912059 | 0.98  | 1     | 1.53E-10  |
| S1PR1       | 8.52E-15 | 0.763081041  | 0.91  | 0.798 | 1.86E-10  |
| HSPA8       | 1.28E-14 | 0.772402705  | 0.98  | 0.977 | 2.80E-10  |
| MARCKS      | 1.54E-14 | 0.854679203  | 0.84  | 0.597 | 3.36E-10  |
| MT2A        | 1.95E-14 | 1.724632629  | 0.96  | 0.922 | 4.25E-10  |
| MALL        | 2.02E-14 | 0.880472266  | 0.55  | 0.101 | 4.40E-10  |
| MESDC1      | 2.45E-14 | 1.00613659   | 0.62  | 0.194 | 5.35E-10  |
| GIMAP7      | 3.31E-14 | -0.757845415 | 0.32  | 0.814 | 7.22E-10  |
| MCL1        | 4.97E-14 | 0.669640057  | 0.98  | 0.868 | 1.08E-09  |

|                |          |              |      |       |          |
|----------------|----------|--------------|------|-------|----------|
| DNAJB6         | 5.29E-14 | 0.874792048  | 0.89 | 0.698 | 1.15E-09 |
| ANGPTL4        | 5.32E-14 | 0.99815807   | 0.71 | 0.256 | 1.16E-09 |
| PLK3           | 6.00E-14 | 0.679312678  | 0.59 | 0.132 | 1.31E-09 |
| KDM6B          | 7.51E-14 | 0.861806978  | 0.68 | 0.295 | 1.64E-09 |
| HSPA5          | 7.68E-14 | 1.083484726  | 0.97 | 0.891 | 1.67E-09 |
| NUAK1          | 8.18E-14 | -0.707884329 | 0.14 | 0.62  | 1.78E-09 |
| FLT1           | 1.22E-13 | 0.731196377  | 0.94 | 0.86  | 2.67E-09 |
| ID1            | 1.92E-13 | -0.73206501  | 0.88 | 1     | 4.19E-09 |
| DUSP6          | 2.31E-13 | 0.693310048  | 0.97 | 0.876 | 5.04E-09 |
| TSC22D4        | 3.10E-13 | -0.636514686 | 0.08 | 0.543 | 6.76E-09 |
| PDK4           | 3.61E-13 | -0.808515682 | 0.6  | 0.938 | 7.87E-09 |
| PIM3           | 4.29E-13 | -0.733276204 | 0.17 | 0.659 | 9.34E-09 |
| ACKR3          | 5.35E-13 | 0.850583758  | 0.57 | 0.163 | 1.17E-08 |
| SLC20A1        | 6.11E-13 | 0.791398095  | 0.59 | 0.178 | 1.33E-08 |
| EIF4A1         | 6.37E-13 | 0.695848193  | 0.82 | 0.566 | 1.39E-08 |
| ICAM1          | 7.67E-13 | 1.281853415  | 0.79 | 0.574 | 1.67E-08 |
| ENG            | 9.57E-13 | -0.659634853 | 0.96 | 0.969 | 2.09E-08 |
| MCAM           | 1.22E-12 | 0.795211198  | 0.58 | 0.171 | 2.66E-08 |
| ATP1A1         | 1.75E-12 | 0.740677117  | 0.83 | 0.558 | 3.81E-08 |
| RAP1B          | 1.84E-12 | 0.701069174  | 0.91 | 0.729 | 4.02E-08 |
| SPHK1          | 2.06E-12 | 0.539744464  | 0.38 | 0.023 | 4.49E-08 |
| TRIB1          | 2.55E-12 | 0.765852897  | 0.74 | 0.295 | 5.56E-08 |
| HYAL2          | 2.59E-12 | 0.840067674  | 0.95 | 0.853 | 5.64E-08 |
| B3GNT5         | 2.96E-12 | 0.721592843  | 0.49 | 0.101 | 6.45E-08 |
| SNRPB          | 3.40E-12 | 0.633110842  | 0.84 | 0.535 | 7.42E-08 |
| SLCO4A1        | 3.41E-12 | 0.752861554  | 0.66 | 0.248 | 7.43E-08 |
| PTPN1          | 3.59E-12 | 0.885074734  | 0.74 | 0.434 | 7.82E-08 |
| PNPLA8         | 3.63E-12 | 0.681544419  | 0.63 | 0.233 | 7.92E-08 |
| ZYG            | 4.60E-12 | 0.852242981  | 0.74 | 0.473 | 1.00E-07 |
| RTKL1-TNFRSF6B | 5.80E-12 | 0.906350066  | 0.32 | 0     | 1.27E-07 |
| CIRBP          | 5.92E-12 | -0.564935915 | 0.87 | 0.938 | 1.29E-07 |
| MAFF           | 6.11E-12 | 0.762203281  | 0.68 | 0.295 | 1.33E-07 |
| MYC            | 6.34E-12 | 0.71297518   | 0.97 | 0.721 | 1.38E-07 |
| ACTB           | 7.34E-12 | 0.537239748  | 1    | 0.992 | 1.60E-07 |
| ARID5A         | 7.86E-12 | 0.65632936   | 0.54 | 0.155 | 1.71E-07 |
| EIF5A          | 8.95E-12 | 0.749592413  | 0.79 | 0.535 | 1.95E-07 |
| SAT1           | 9.19E-12 | 0.607975548  | 1    | 0.984 | 2.00E-07 |
| PHLDB1         | 9.68E-12 | 0.577910687  | 0.5  | 0.109 | 2.11E-07 |
| CDC37          | 9.80E-12 | 0.587502714  | 0.93 | 0.829 | 2.14E-07 |
| SOX17          | 9.82E-12 | 0.722243266  | 0.92 | 0.643 | 2.14E-07 |
| KLF6           | 1.02E-11 | 0.701771875  | 0.97 | 0.837 | 2.23E-07 |
| ISG20          | 1.22E-11 | 0.590803887  | 0.38 | 0.031 | 2.66E-07 |
| SPRY4          | 2.01E-11 | 0.763784811  | 0.77 | 0.442 | 4.38E-07 |
| EIF1           | 2.43E-11 | 0.281232505  | 1    | 1     | 5.29E-07 |
| ARHGAP23       | 2.46E-11 | 0.531485551  | 0.51 | 0.124 | 5.36E-07 |
| GIMAP2         | 3.06E-11 | -0.636793973 | 0.19 | 0.589 | 6.68E-07 |
| PLIN2          | 3.64E-11 | 0.696099015  | 0.87 | 0.76  | 7.95E-07 |
| VCAM1          | 4.24E-11 | 1.318530433  | 0.56 | 0.202 | 9.26E-07 |
| PVRL2          | 4.48E-11 | 0.617195493  | 0.87 | 0.783 | 9.78E-07 |
| DLL4           | 5.51E-11 | -0.638532531 | 0.27 | 0.682 | 1.20E-06 |
| SSH1           | 5.72E-11 | 0.724475731  | 0.49 | 0.109 | 1.25E-06 |
| CLIC1          | 5.79E-11 | 0.528279364  | 0.97 | 0.907 | 1.26E-06 |
| RPS29          | 5.94E-11 | 0.400197676  | 0.98 | 0.961 | 1.30E-06 |
| ADAMTS1        | 6.05E-11 | 0.788307567  | 0.9  | 0.721 | 1.32E-06 |
| PHLDA1         | 6.39E-11 | 1.056587825  | 0.6  | 0.209 | 1.39E-06 |
| HSPG2          | 7.77E-11 | -0.628232637 | 0.76 | 0.946 | 1.70E-06 |
| BZW1           | 9.09E-11 | 0.686871564  | 0.79 | 0.589 | 1.98E-06 |
| RELB           | 9.55E-11 | 0.543456138  | 0.46 | 0.101 | 2.08E-06 |
| EHD4           | 9.64E-11 | 0.612580871  | 0.69 | 0.341 | 2.10E-06 |
| CDKN1B         | 1.00E-10 | -0.557476297 | 0.25 | 0.674 | 2.18E-06 |
| TCEB1          | 1.21E-10 | 0.605789892  | 0.89 | 0.69  | 2.64E-06 |
| RHOC           | 1.24E-10 | 0.481868508  | 0.97 | 0.907 | 2.70E-06 |
| FGL2           | 1.34E-10 | 0.553903936  | 0.43 | 0.078 | 2.91E-06 |
| SDPR           | 1.46E-10 | -0.552084136 | 0.87 | 0.969 | 3.18E-06 |
| PDLIM3         | 1.68E-10 | 0.72544009   | 0.63 | 0.264 | 3.67E-06 |
| ID2            | 1.86E-10 | -0.793581505 | 0.59 | 0.86  | 4.05E-06 |
| HBB            | 2.23E-10 | -1.373857725 | 0.14 | 0.566 | 4.87E-06 |
| CXCL8          | 2.37E-10 | 1.378875894  | 0.45 | 0.101 | 5.18E-06 |
| RHEB           | 2.68E-10 | 0.556668467  | 0.77 | 0.442 | 5.85E-06 |
| GPC1           | 2.69E-10 | 0.455527408  | 0.31 | 0.016 | 5.87E-06 |

|             |          |              |      |       |             |
|-------------|----------|--------------|------|-------|-------------|
| TOMM5       | 2.82E-10 | 0.659221249  | 0.77 | 0.55  | 6.16E-06    |
| TMSB10      | 2.90E-10 | 0.347477404  | 1    | 1     | 6.34E-06    |
| PPRC1       | 3.13E-10 | 0.547649089  | 0.39 | 0.062 | 6.82E-06    |
| FAM212A     | 3.30E-10 | -0.407448257 | 0.01 | 0.349 | 7.20E-06    |
| GADD45A     | 3.42E-10 | 0.596499366  | 0.63 | 0.279 | 7.45E-06    |
| RSRP1       | 3.85E-10 | -0.605926674 | 0.58 | 0.868 | 8.40E-06    |
| SH3BP5      | 4.07E-10 | 0.59966081   | 0.87 | 0.682 | 8.87E-06    |
| IGFBP4      | 4.39E-10 | -0.411182124 | 0.97 | 0.992 | 9.58E-06    |
| ITM2B       | 5.29E-10 | -0.34303133  | 1    | 1     | 1.15E-05    |
| WDR43       | 5.48E-10 | 0.478287405  | 0.42 | 0.078 | 1.20E-05    |
| JUND        | 5.70E-10 | 0.572096706  | 0.84 | 0.597 | 1.24E-05    |
| IL32        | 5.74E-10 | 0.997204841  | 0.53 | 0.202 | 1.25E-05    |
| TNFAIP3     | 5.90E-10 | 1.088049975  | 0.72 | 0.496 | 1.29E-05    |
| SMAD6       | 6.21E-10 | -0.540313581 | 0.11 | 0.488 | 1.35E-05    |
| SNU13       | 6.32E-10 | 0.561946323  | 0.85 | 0.729 | 1.38E-05    |
| ANKRD55     | 6.76E-10 | -0.498859283 | 0.11 | 0.496 | 1.47E-05    |
| NPY1R       | 7.75E-10 | -0.620759493 | 0.4  | 0.76  | 1.69E-05    |
| DOT1L       | 8.06E-10 | 0.541101351  | 0.3  | 0.016 | 1.76E-05    |
| MEIS2       | 8.33E-10 | -0.565094089 | 0.33 | 0.69  | 1.82E-05    |
| LRRC59      | 8.93E-10 | 0.535972221  | 0.55 | 0.194 | 1.95E-05    |
| MSN         | 9.03E-10 | 0.59435114   | 0.78 | 0.574 | 1.97E-05    |
| SC5D        | 1.15E-09 | -0.666436724 | 0.57 | 0.845 | 2.51E-05    |
| YWHAH       | 1.28E-09 | 0.580609785  | 0.79 | 0.543 | 2.80E-05    |
| STARD4      | 1.33E-09 | 0.564288113  | 0.38 | 0.062 | 2.90E-05    |
| SNHG15      | 1.33E-09 | 0.560924787  | 0.64 | 0.279 | 2.90E-05    |
| DNAJB1      | 1.40E-09 | 0.643934018  | 0.96 | 0.891 | 3.05E-05    |
| EVA1C       | 1.50E-09 | 0.636098816  | 0.69 | 0.388 | 3.27E-05    |
| SOCS2       | 1.64E-09 | 0.639548736  | 0.84 | 0.605 | 3.58E-05    |
| MYL6        | 1.76E-09 | 0.411656688  | 0.98 | 0.992 | 3.85E-05    |
| STOM        | 1.90E-09 | 0.463091869  | 0.97 | 0.984 | 4.14E-05    |
| NME1        | 2.06E-09 | 0.548760872  | 0.42 | 0.093 | 4.49E-05    |
| SBNO2       | 2.12E-09 | 0.465461225  | 0.45 | 0.109 | 4.62E-05    |
| ARID5B      | 2.65E-09 | 0.626429692  | 0.67 | 0.318 | 5.78E-05    |
| LATS2       | 2.94E-09 | 0.455395305  | 0.52 | 0.155 | 6.41E-05    |
| CLDN5       | 2.97E-09 | -0.629634913 | 0.84 | 0.984 | 6.48E-05    |
| RUNX1T1     | 3.44E-09 | -0.505433084 | 0.06 | 0.395 | 7.51E-05    |
| STX11       | 3.46E-09 | 0.436271455  | 0.28 | 0.016 | 7.55E-05    |
| TSSC4       | 3.59E-09 | 0.650609238  | 0.51 | 0.171 | 7.82E-05    |
| PHF3        | 4.54E-09 | -0.503783255 | 0.19 | 0.566 | 9.91E-05    |
| C11orf96    | 4.56E-09 | 0.660624499  | 0.82 | 0.558 | 9.93E-05    |
| MIR22HG     | 5.17E-09 | 0.600402217  | 0.67 | 0.364 | 0.000112819 |
| KCNH7       | 5.85E-09 | -0.470146665 | 0.1  | 0.457 | 0.000127668 |
| RFX2        | 6.18E-09 | 0.335351263  | 0.26 | 0.008 | 0.000134666 |
| GPR4        | 6.62E-09 | 0.627433846  | 0.55 | 0.209 | 0.000144322 |
| SLC12A7     | 7.12E-09 | 0.629010725  | 0.52 | 0.186 | 0.00015528  |
| GOLT1B      | 7.57E-09 | 0.498668287  | 0.46 | 0.132 | 0.000165139 |
| DNMBP       | 9.94E-09 | 0.444366224  | 0.41 | 0.093 | 0.000216869 |
| SPSB3       | 1.02E-08 | -0.425967461 | 0.13 | 0.496 | 0.000222673 |
| NOP58       | 1.04E-08 | 0.540981005  | 0.64 | 0.333 | 0.000227564 |
| CDK17       | 1.07E-08 | 0.599814659  | 0.73 | 0.419 | 0.00023422  |
| IQCJ-SCHIP1 | 1.09E-08 | 0.428365362  | 0.38 | 0.078 | 0.000236847 |
| SLC25A37    | 1.12E-08 | 0.552884397  | 0.74 | 0.434 | 0.000245305 |
| GJA1        | 1.14E-08 | 0.640488636  | 0.38 | 0.085 | 0.000249649 |
| VMP1        | 1.34E-08 | 0.483559294  | 0.65 | 0.318 | 0.000293061 |
| SYNJ2       | 1.45E-08 | 0.378242087  | 0.31 | 0.039 | 0.000315258 |
| RAN         | 1.50E-08 | 0.532301725  | 0.81 | 0.574 | 0.000328187 |
| AP2M1       | 1.62E-08 | -0.44327247  | 0.65 | 0.922 | 0.000352977 |
| AP1B1       | 1.63E-08 | -0.402450552 | 0.16 | 0.527 | 0.000355965 |
| RTN4        | 1.66E-08 | 0.492072825  | 0.86 | 0.837 | 0.000362006 |
| PNO1        | 1.72E-08 | 0.432539876  | 0.32 | 0.047 | 0.000374345 |
| SOX18       | 1.73E-08 | -0.591136198 | 0.16 | 0.519 | 0.000377816 |
| TEAD4       | 1.81E-08 | 0.600675562  | 0.64 | 0.341 | 0.000394305 |
| UAP1        | 1.88E-08 | 0.494666223  | 0.41 | 0.101 | 0.000409757 |
| UGCG        | 2.16E-08 | 0.573132471  | 0.86 | 0.69  | 0.000471555 |
| TUBB6       | 2.17E-08 | 0.627726797  | 0.59 | 0.302 | 0.000473145 |
| RPL36A      | 2.27E-08 | 0.345364587  | 0.96 | 0.953 | 0.00049502  |
| SLC4A7      | 2.47E-08 | 0.343889145  | 0.26 | 0.016 | 0.00053893  |
| YBX3        | 2.56E-08 | 0.576744458  | 0.8  | 0.558 | 0.000558762 |
| HNRNPAB     | 2.61E-08 | 0.597095224  | 0.55 | 0.233 | 0.000568666 |
| MAF         | 2.63E-08 | -0.460992606 | 0.74 | 0.891 | 0.000573518 |

|          |          |              |      |       |             |
|----------|----------|--------------|------|-------|-------------|
| CREM     | 2.65E-08 | 0.506969481  | 0.55 | 0.225 | 0.000577527 |
| FLNA     | 2.73E-08 | 0.494994945  | 0.39 | 0.085 | 0.000595507 |
| B4GALT5  | 2.77E-08 | 0.504602961  | 0.63 | 0.271 | 0.000603614 |
| PGK1     | 2.79E-08 | 0.546811197  | 0.84 | 0.667 | 0.000608699 |
| NR2F2    | 2.83E-08 | -0.510838313 | 0.51 | 0.829 | 0.000617674 |
| SRGN     | 2.86E-08 | 0.547345249  | 0.99 | 0.977 | 0.000624335 |
| NOLC1    | 2.93E-08 | 0.572304916  | 0.62 | 0.287 | 0.00063927  |
| FSTL3    | 3.06E-08 | 0.839043782  | 0.27 | 0.023 | 0.000668311 |
| WARS     | 3.38E-08 | 0.508513682  | 0.87 | 0.69  | 0.000736879 |
| HSPA6    | 4.52E-08 | 1.007059067  | 0.27 | 0.023 | 0.000986377 |
| PLXNA2   | 4.63E-08 | 0.420262579  | 0.35 | 0.07  | 0.001008635 |
| TINAGL1  | 4.65E-08 | 0.395915062  | 0.97 | 0.961 | 0.001013781 |
| BAZ1A    | 4.90E-08 | 0.555564045  | 0.65 | 0.326 | 0.001067947 |
| TMEM140  | 5.30E-08 | -0.523293713 | 0.26 | 0.589 | 0.001155245 |
| INPP1    | 5.34E-08 | 0.581070766  | 0.73 | 0.574 | 0.001164353 |
| CYP20A1  | 5.61E-08 | -0.522745868 | 0.16 | 0.473 | 0.001223952 |
| TMEM204  | 5.71E-08 | -0.45487911  | 0.37 | 0.744 | 0.001245959 |
| LRRC32   | 5.82E-08 | 0.652643392  | 0.71 | 0.403 | 0.001268239 |
| NEK3     | 5.91E-08 | -0.365168018 | 0.07 | 0.395 | 0.001288522 |
| MANF     | 5.97E-08 | 0.468293391  | 0.72 | 0.488 | 0.001302638 |
| SRM      | 5.99E-08 | 0.338379531  | 0.23 | 0.008 | 0.001306047 |
| PDLIM1   | 6.09E-08 | 0.397853393  | 0.99 | 0.938 | 0.001328876 |
| MORF4L2  | 6.43E-08 | 0.547512849  | 0.77 | 0.535 | 0.001402643 |
| SEC61G   | 6.46E-08 | 0.467895434  | 0.91 | 0.806 | 0.001408518 |
| C10orf10 | 6.52E-08 | -0.750724525 | 0.13 | 0.45  | 0.001422104 |
| ACTG1    | 6.79E-08 | 0.478447918  | 0.98 | 1     | 0.001479737 |
| ZFP36    | 6.90E-08 | -0.584271371 | 0.98 | 1     | 0.001504797 |
| DNAJB11  | 7.13E-08 | 0.651072731  | 0.62 | 0.372 | 0.00155512  |
| ARPC5L   | 8.34E-08 | 0.55729156   | 0.7  | 0.403 | 0.001817743 |
| KLF2     | 8.72E-08 | -0.615550321 | 0.46 | 0.791 | 0.001901303 |
| FOS      | 8.77E-08 | -0.567730626 | 0.98 | 1     | 0.001912702 |
| CRHBP    | 8.92E-08 | -0.501158201 | 0.99 | 0.992 | 0.001944832 |
| OIT3     | 9.09E-08 | -0.520961689 | 0.88 | 0.946 | 0.001982873 |
| HADHB    | 9.33E-08 | -0.411609197 | 0.24 | 0.597 | 0.002034933 |
| ATP13A3  | 9.38E-08 | 0.528318798  | 0.64 | 0.279 | 0.00204657  |
| NRP1     | 9.64E-08 | -0.4396989   | 0.57 | 0.806 | 0.002103267 |
| CHKA     | 1.03E-07 | -0.376066097 | 0.06 | 0.364 | 0.002237308 |
| NIP7     | 1.03E-07 | 0.405728004  | 0.39 | 0.101 | 0.0022378   |
| SAT2     | 1.03E-07 | -0.423634986 | 0.49 | 0.822 | 0.002245735 |
| ERP29    | 1.08E-07 | -0.436227075 | 0.56 | 0.837 | 0.002350954 |
| C8orf4   | 1.10E-07 | 0.561298414  | 0.91 | 0.736 | 0.0023935   |
| HLA-E    | 1.12E-07 | -0.279241051 | 1    | 1     | 0.002440188 |
| REEP3    | 1.13E-07 | 0.520493435  | 0.72 | 0.465 | 0.00246169  |
| PPARD    | 1.19E-07 | 0.331749547  | 0.29 | 0.039 | 0.002594912 |
| TMEM37   | 1.25E-07 | -0.478227136 | 0.4  | 0.705 | 0.002736765 |
| MTRF1L   | 1.28E-07 | 0.513478421  | 0.63 | 0.318 | 0.002783075 |
| TXNIP    | 1.28E-07 | -0.543736766 | 0.24 | 0.574 | 0.002799667 |
| CLK4     | 1.30E-07 | -0.379105522 | 0.06 | 0.357 | 0.00284545  |
| PDCD4    | 1.42E-07 | -0.553445841 | 0.57 | 0.829 | 0.003104329 |
| ETS2     | 1.48E-07 | 0.385944772  | 0.96 | 0.907 | 0.003230407 |
| ENO1     | 1.49E-07 | 0.488281862  | 0.75 | 0.535 | 0.003258207 |
| SEMA6A   | 1.55E-07 | -0.496359517 | 0.52 | 0.829 | 0.003371742 |
| INHBB    | 1.59E-07 | 0.559194028  | 0.32 | 0.062 | 0.003475441 |
| ZFAND2A  | 1.75E-07 | 0.906511911  | 0.53 | 0.256 | 0.003809863 |
| DDIT3    | 1.75E-07 | -0.488481594 | 0.26 | 0.597 | 0.00381454  |
| TNFRSF1A | 1.80E-07 | 0.424255315  | 0.9  | 0.806 | 0.003921959 |
| CTNNB1   | 1.91E-07 | 0.522901873  | 0.74 | 0.543 | 0.00416574  |
| NAMPT    | 1.93E-07 | 0.461019696  | 0.96 | 0.822 | 0.004209072 |
| BCL2L1   | 1.94E-07 | 0.539139597  | 0.5  | 0.225 | 0.004232856 |
| STC1     | 1.99E-07 | 0.801893176  | 0.29 | 0.047 | 0.004338798 |
| NUPR1    | 2.06E-07 | -0.481441916 | 0.51 | 0.752 | 0.004483159 |
| SERPINB9 | 2.07E-07 | 0.5299533    | 0.74 | 0.488 | 0.004516161 |
| SNN      | 2.12E-07 | 0.456284715  | 0.5  | 0.178 | 0.004624941 |
| SDF2L1   | 2.14E-07 | 0.674864422  | 0.59 | 0.326 | 0.004671893 |
| F8       | 2.31E-07 | -0.41268898  | 0.83 | 0.969 | 0.005037047 |
| UBE2N    | 2.34E-07 | 0.478392022  | 0.71 | 0.442 | 0.005105182 |
| EDN1     | 2.38E-07 | -0.837322632 | 0.24 | 0.581 | 0.005180504 |
| STAB2    | 2.39E-07 | -0.708370253 | 0.47 | 0.713 | 0.005219807 |
| ST6GAL1  | 2.45E-07 | -0.424702129 | 0.46 | 0.767 | 0.005335907 |
| NRROS    | 2.47E-07 | -0.401652796 | 0.06 | 0.349 | 0.005391512 |



|           |          |              |      |       |             |
|-----------|----------|--------------|------|-------|-------------|
| ART4      | 2.67E-07 | -0.405042612 | 0.26 | 0.581 | 0.005815624 |
| NOS3      | 2.73E-07 | 0.732245791  | 0.63 | 0.349 | 0.005943117 |
| CREB5     | 2.89E-07 | 0.351512382  | 0.23 | 0.016 | 0.006307168 |
| LRRC8C    | 2.91E-07 | 0.553956245  | 0.43 | 0.147 | 0.006347153 |
| SLFN5     | 2.98E-07 | -0.446501243 | 0.08 | 0.372 | 0.006492106 |
| INSR      | 3.02E-07 | 0.52646315   | 0.68 | 0.38  | 0.006575845 |
| TFPI2     | 3.02E-07 | 0.646761151  | 0.91 | 0.798 | 0.006580709 |
| MAP1S     | 3.04E-07 | 0.553366472  | 0.51 | 0.209 | 0.006637178 |
| OAF       | 3.18E-07 | 0.348109676  | 0.26 | 0.031 | 0.006937237 |
| LPAR6     | 3.18E-07 | -0.400924935 | 0.84 | 0.899 | 0.006938591 |
| YWHAG     | 3.49E-07 | 0.488459658  | 0.57 | 0.279 | 0.007610119 |
| ETF1      | 3.56E-07 | 0.545891235  | 0.5  | 0.225 | 0.007765188 |
| STRAP     | 3.58E-07 | 0.439945951  | 0.75 | 0.535 | 0.007800772 |
| TMEM245   | 3.63E-07 | -0.403588656 | 0.09 | 0.38  | 0.007923668 |
| PLPP3     | 3.69E-07 | 0.371567307  | 0.99 | 0.984 | 0.008057589 |
| MLLT10    | 3.97E-07 | -0.397636946 | 0.07 | 0.357 | 0.00866071  |
| FAM177A1  | 4.07E-07 | 0.438745116  | 0.64 | 0.372 | 0.008864952 |
| SEPP1     | 4.09E-07 | -0.40234412  | 0.98 | 0.984 | 0.008908881 |
| TNFSF10   | 4.39E-07 | -0.444976321 | 0.5  | 0.783 | 0.009579856 |
| SMAD7     | 4.66E-07 | -0.396732283 | 0.07 | 0.349 | 0.010168644 |
| LIMS2     | 4.68E-07 | -0.503097317 | 0.48 | 0.767 | 0.010196327 |
| ACACB     | 4.86E-07 | -0.422109039 | 0.08 | 0.364 | 0.010606839 |
| GCC2      | 4.93E-07 | -0.437787931 | 0.15 | 0.45  | 0.010744433 |
| AQP3      | 4.93E-07 | 0.490519357  | 0.46 | 0.155 | 0.010757719 |
| YES1      | 4.99E-07 | 0.47952932   | 0.82 | 0.612 | 0.010888462 |
| TSPAN7    | 5.26E-07 | -0.352771942 | 0.97 | 0.984 | 0.011464054 |
| NFKB1     | 5.39E-07 | 0.413546467  | 0.38 | 0.116 | 0.01175885  |
| TNFRSF10A | 5.65E-07 | 0.299456317  | 0.27 | 0.039 | 0.012327753 |
| PNPLA2    | 5.73E-07 | -0.435655022 | 0.74 | 0.868 | 0.012498913 |
| PTGES3    | 5.92E-07 | 0.473672828  | 0.97 | 0.876 | 0.012900158 |
| FCHO2     | 6.17E-07 | -0.449884265 | 0.23 | 0.519 | 0.013445838 |
| ARHGDI1   | 6.42E-07 | -0.365863576 | 0.87 | 0.946 | 0.014003119 |
| 3-Mar     | 6.48E-07 | 0.517746565  | 0.62 | 0.333 | 0.014137849 |
| FCGRT     | 6.54E-07 | -0.273909117 | 0.97 | 0.984 | 0.01426884  |
| BCAR1     | 6.57E-07 | 0.462761554  | 0.49 | 0.202 | 0.014338164 |
| MT1X      | 6.79E-07 | 1.535102862  | 0.59 | 0.326 | 0.014798221 |
| VAPA      | 7.00E-07 | 0.429643153  | 0.93 | 0.845 | 0.015262421 |
| HLA-A     | 7.41E-07 | -0.266784662 | 0.99 | 1     | 0.016159385 |
| ZFYVE21   | 8.22E-07 | -0.371753129 | 0.18 | 0.512 | 0.017936135 |
| AHSA1     | 8.39E-07 | 0.506877155  | 0.47 | 0.194 | 0.018304954 |
| ADGRG1    | 8.71E-07 | 0.486627267  | 0.69 | 0.426 | 0.018983949 |
| COL4A3BP  | 8.86E-07 | -0.438365834 | 0.26 | 0.574 | 0.019311964 |
| CTSD      | 8.96E-07 | -0.387011821 | 0.99 | 0.992 | 0.019550533 |
| SOD2      | 9.63E-07 | 0.652668943  | 0.78 | 0.636 | 0.020995086 |
| NFKBIZ    | 9.67E-07 | -0.469113811 | 0.47 | 0.806 | 0.021090594 |
| HSPA9     | 9.89E-07 | 0.423702907  | 0.53 | 0.256 | 0.021572448 |
| TPM3      | 1.07E-06 | 0.379220681  | 0.97 | 0.853 | 0.023364437 |
| SHE       | 1.10E-06 | -0.344523866 | 0.2  | 0.527 | 0.023971047 |
| PSMB8     | 1.16E-06 | -0.412377432 | 0.44 | 0.713 | 0.025270983 |
| SFPQ      | 1.18E-06 | 0.397817844  | 0.84 | 0.643 | 0.025732053 |
| AP1S2     | 1.18E-06 | -0.388667294 | 0.69 | 0.876 | 0.025765176 |
| HIF1A     | 1.20E-06 | 0.429127373  | 0.89 | 0.907 | 0.026092043 |
| MAP3K13   | 1.25E-06 | 0.460205332  | 0.64 | 0.395 | 0.027359078 |
| PTPRB     | 1.27E-06 | -0.395005247 | 0.71 | 0.938 | 0.027767809 |
| RASIP1    | 1.31E-06 | 0.447428215  | 0.61 | 0.326 | 0.028661301 |
| MIS18BP1  | 1.33E-06 | -0.369405015 | 0.09 | 0.364 | 0.028950381 |
| ZSWIM6    | 1.34E-06 | 0.441784825  | 0.43 | 0.163 | 0.029257715 |
| KPNA4     | 1.39E-06 | 0.420136066  | 0.41 | 0.155 | 0.030291946 |
| EHBP1     | 1.46E-06 | -0.351374221 | 0.14 | 0.426 | 0.031901103 |
| USP12     | 1.53E-06 | 0.390343073  | 0.39 | 0.124 | 0.033332801 |
| CALCOCO2  | 1.58E-06 | -0.403930335 | 0.46 | 0.752 | 0.034495731 |
| VIMP      | 1.63E-06 | 0.541997568  | 0.76 | 0.643 | 0.035652481 |
| PSAP      | 1.69E-06 | -0.343262406 | 0.9  | 0.984 | 0.03678186  |
| MTHFD2    | 1.69E-06 | 0.399930481  | 0.37 | 0.116 | 0.036827537 |
| MLST8     | 1.77E-06 | -0.322025467 | 0.07 | 0.326 | 0.038573156 |
| SRP19     | 1.82E-06 | 0.326844942  | 0.33 | 0.085 | 0.039787917 |
| VPS13C    | 1.82E-06 | -0.402837183 | 0.22 | 0.543 | 0.039793063 |
| CACYBP    | 1.87E-06 | 0.530753003  | 0.66 | 0.442 | 0.04088691  |
| ZNF680    | 1.91E-06 | -0.285317672 | 0.03 | 0.271 | 0.041583351 |
| C2orf88   | 1.96E-06 | -0.480435568 | 0.23 | 0.519 | 0.042699233 |

|           |          |              |      |       |             |
|-----------|----------|--------------|------|-------|-------------|
| ATP5G2    | 1.96E-06 | -0.261277826 | 0.94 | 0.992 | 0.042786145 |
| KIAA1551  | 2.09E-06 | -0.474792522 | 0.18 | 0.465 | 0.045581568 |
| F2R       | 2.14E-06 | -0.350503801 | 0.82 | 0.938 | 0.046702892 |
| NMRK1     | 2.15E-06 | -0.35225336  | 0.48 | 0.752 | 0.046862637 |
| PSMB8-AS1 | 2.19E-06 | -0.346848641 | 0.08 | 0.341 | 0.047673336 |
| CHD9      | 2.20E-06 | -0.392615313 | 0.33 | 0.643 | 0.048014898 |
| KLF10     | 2.21E-06 | -0.43450061  | 0.29 | 0.597 | 0.048216989 |
| TES       | 2.22E-06 | 0.350230879  | 0.3  | 0.062 | 0.048478435 |
| UNG       | 2.28E-06 | -0.334251322 | 0.08 | 0.341 | 0.049644078 |

List of differentially expressed genes of STAB1 LSEC in overall stage (PR versus PP)

| gene        | p val    | avg logFC    | pct.1 | pct.2 | p val adj |
|-------------|----------|--------------|-------|-------|-----------|
| HSPD1       | 1.55E-25 | 1.856792714  | 0.837 | 0.255 | 3.39E-21  |
| ADAMTS9     | 6.84E-25 | 1.847931712  | 0.63  | 0.014 | 1.49E-20  |
| HSP90AB1    | 1.87E-23 | 1.215460421  | 0.967 | 0.567 | 4.08E-19  |
| HSPE1       | 5.36E-23 | 1.668444     | 0.848 | 0.305 | 1.17E-18  |
| PNP         | 2.40E-21 | 1.559310784  | 0.652 | 0.085 | 5.23E-17  |
| AKAP12      | 2.70E-21 | 1.126916888  | 0.978 | 0.688 | 5.88E-17  |
| ID3         | 1.07E-20 | -1.536195193 | 0.446 | 0.901 | 2.34E-16  |
| PLAUR       | 1.13E-20 | 1.407189247  | 0.522 | 0.007 | 2.46E-16  |
| HSPB1       | 3.51E-19 | 1.314288206  | 0.967 | 0.688 | 7.66E-15  |
| HSP90AA1    | 3.77E-19 | 1.327018006  | 0.924 | 0.667 | 8.22E-15  |
| TM4SF1      | 1.74E-18 | 1.192017113  | 0.989 | 0.801 | 3.80E-14  |
| EMP1        | 3.49E-18 | 1.622302037  | 0.685 | 0.156 | 7.62E-14  |
| MIR4435-2HG | 1.40E-15 | 1.369610257  | 0.554 | 0.092 | 3.04E-11  |
| TIMP1       | 1.90E-15 | 1.074071284  | 0.989 | 0.936 | 4.15E-11  |
| MT2A        | 6.33E-15 | 1.779501713  | 0.967 | 0.83  | 1.38E-10  |
| CD9         | 3.80E-14 | 0.869911758  | 0.935 | 0.702 | 8.28E-10  |
| ADAMTS4     | 5.60E-14 | 1.401031678  | 0.609 | 0.163 | 1.22E-09  |
| LMNA        | 2.30E-13 | 1.319408128  | 0.576 | 0.149 | 5.02E-09  |
| DEFA3       | 2.94E-13 | -1.414195205 | 0.043 | 0.511 | 6.42E-09  |
| UPP1        | 3.16E-13 | 1.149289669  | 0.685 | 0.277 | 6.90E-09  |
| DDX21       | 7.10E-13 | 1.110903172  | 0.587 | 0.163 | 1.55E-08  |
| DDIT4       | 1.01E-12 | -1.218658701 | 0.359 | 0.766 | 2.20E-08  |
| THBD        | 1.33E-12 | 1.060685423  | 0.663 | 0.213 | 2.90E-08  |
| MIR222HG    | 2.31E-12 | 1.040272098  | 0.467 | 0.071 | 5.03E-08  |
| TOMM5       | 2.78E-12 | 0.89904945   | 0.652 | 0.241 | 6.06E-08  |
| MYADM       | 5.02E-12 | 1.044030198  | 0.565 | 0.156 | 1.09E-07  |
| INSIG1      | 6.78E-12 | 0.989122845  | 0.467 | 0.092 | 1.48E-07  |
| TNFRSF12A   | 9.92E-12 | 0.961406385  | 0.293 | 0     | 2.16E-07  |
| MESDC1      | 2.55E-11 | 1.114667138  | 0.457 | 0.092 | 5.55E-07  |
| HSPA1A      | 3.01E-11 | 0.789685996  | 0.935 | 0.652 | 6.57E-07  |
| JUND        | 3.12E-11 | 0.913322468  | 0.717 | 0.34  | 6.81E-07  |
| MCL1        | 3.19E-11 | 0.884715257  | 0.783 | 0.426 | 6.95E-07  |
| ACKR3       | 4.06E-11 | 0.907155115  | 0.37  | 0.043 | 8.86E-07  |
| PMP22       | 6.10E-11 | 0.965434591  | 0.652 | 0.277 | 1.33E-06  |
| HES1        | 6.27E-11 | -1.261392093 | 0.174 | 0.603 | 1.37E-06  |
| HSPA1B      | 1.23E-10 | 0.752895443  | 0.859 | 0.475 | 2.68E-06  |
| CD59        | 1.24E-10 | 0.698415816  | 0.88  | 0.638 | 2.70E-06  |
| FOSL1       | 1.31E-10 | 0.891564931  | 0.337 | 0.028 | 2.85E-06  |
| BAG3        | 2.63E-10 | 1.111579006  | 0.489 | 0.142 | 5.72E-06  |
| SBNO2       | 3.00E-10 | 0.926187798  | 0.37  | 0.05  | 6.54E-06  |
| LITAF       | 3.17E-10 | 0.924639341  | 0.533 | 0.177 | 6.92E-06  |
| MYC         | 3.18E-10 | 0.90727645   | 0.685 | 0.312 | 6.94E-06  |
| ANGPTL4     | 3.38E-10 | 1.078776985  | 0.543 | 0.17  | 7.36E-06  |
| PVRL2       | 3.51E-10 | 0.963350263  | 0.63  | 0.277 | 7.66E-06  |
| LPAR6       | 4.59E-10 | -0.995679375 | 0.446 | 0.745 | 1.00E-05  |
| ENG         | 5.00E-10 | -0.753554195 | 0.739 | 0.887 | 1.09E-05  |
| RSRP1       | 5.08E-10 | -0.9235573   | 0.239 | 0.667 | 1.11E-05  |
| GIMAP7      | 7.61E-10 | -0.930143886 | 0.163 | 0.56  | 1.66E-05  |
| TFPI2       | 9.04E-10 | 1.034502591  | 0.717 | 0.397 | 1.97E-05  |
| PDLIM3      | 1.01E-09 | 0.862952336  | 0.38  | 0.064 | 2.21E-05  |
| SNHG15      | 1.05E-09 | 0.895859422  | 0.413 | 0.078 | 2.30E-05  |
| NOS3        | 1.20E-09 | 0.987931543  | 0.511 | 0.149 | 2.61E-05  |
| CIRBP       | 1.51E-09 | -0.829020498 | 0.457 | 0.73  | 3.29E-05  |
| CDC42EP2    | 1.69E-09 | 0.918180523  | 0.38  | 0.071 | 3.68E-05  |
| SPHK1       | 2.24E-09 | 0.689755965  | 0.25  | 0.007 | 4.88E-05  |

|                |          |              |       |       |             |
|----------------|----------|--------------|-------|-------|-------------|
| NOP56          | 2.24E-09 | 0.886259968  | 0.326 | 0.043 | 4.88E-05    |
| WDR43          | 3.82E-09 | 0.561105049  | 0.272 | 0.014 | 8.33E-05    |
| HSPH1          | 4.12E-09 | 1.065840564  | 0.467 | 0.135 | 8.98E-05    |
| VMP1           | 5.17E-09 | 1.006608831  | 0.522 | 0.177 | 0.000112675 |
| HBB            | 6.52E-09 | -1.005931272 | 0.185 | 0.56  | 0.000142284 |
| CDC37          | 6.77E-09 | 0.785807763  | 0.826 | 0.638 | 0.0001476   |
| SH3BGRL3       | 7.23E-09 | 0.784929647  | 0.793 | 0.574 | 0.000157715 |
| NOP16          | 7.76E-09 | 0.717613156  | 0.304 | 0.035 | 0.000169161 |
| EIF5A          | 1.02E-08 | 0.71489791   | 0.522 | 0.199 | 0.00022186  |
| HES4           | 1.12E-08 | 0.881488167  | 0.25  | 0.014 | 0.000245074 |
| ADAMTS1        | 1.29E-08 | 0.912785315  | 0.652 | 0.305 | 0.000280272 |
| HLA-DRB1       | 1.30E-08 | 0.604225578  | 0.913 | 0.667 | 0.000283219 |
| MT1A           | 1.33E-08 | 1.289067049  | 0.261 | 0.021 | 0.000289308 |
| MARCKS         | 1.47E-08 | 0.966964293  | 0.609 | 0.305 | 0.000320362 |
| CHIC2          | 1.59E-08 | 0.831709535  | 0.489 | 0.17  | 0.000346348 |
| ICAM1          | 2.03E-08 | 1.183798483  | 0.543 | 0.213 | 0.000443764 |
| TSSC4          | 2.11E-08 | 0.776607509  | 0.272 | 0.028 | 0.000459376 |
| ID1            | 2.48E-08 | -0.824578568 | 0.641 | 0.879 | 0.000540043 |
| RHOB           | 2.81E-08 | -1.040660907 | 0.489 | 0.716 | 0.000613781 |
| LINC00152      | 2.84E-08 | 1.014521678  | 0.467 | 0.149 | 0.000619456 |
| MT1X           | 3.19E-08 | 1.396316937  | 0.728 | 0.461 | 0.000695241 |
| GADD45A        | 3.48E-08 | 0.691853015  | 0.348 | 0.064 | 0.000758679 |
| ARHGAP23       | 3.76E-08 | 0.743498683  | 0.37  | 0.078 | 0.000819932 |
| ARID5A         | 3.93E-08 | 0.752613401  | 0.315 | 0.05  | 0.000855985 |
| GPR4           | 4.06E-08 | 0.686513246  | 0.337 | 0.064 | 0.000886078 |
| MCAM           | 4.35E-08 | 0.86160313   | 0.391 | 0.099 | 0.000947947 |
| VCAM1          | 4.48E-08 | 1.195472273  | 0.402 | 0.106 | 0.000976251 |
| NAMPT          | 4.79E-08 | 0.52182627   | 0.826 | 0.546 | 0.00104356  |
| PHLDA1         | 6.34E-08 | 0.974754196  | 0.457 | 0.149 | 0.001382546 |
| ANKRD28        | 6.50E-08 | 0.904240134  | 0.304 | 0.05  | 0.00141782  |
| MAT2A          | 6.60E-08 | 0.708430246  | 0.467 | 0.149 | 0.001438622 |
| DLL4           | 8.87E-08 | -0.976626643 | 0.12  | 0.44  | 0.001934516 |
| TCEB1          | 8.99E-08 | 0.929363321  | 0.554 | 0.262 | 0.001959514 |
| EIF3I          | 1.07E-07 | 0.783588628  | 0.489 | 0.206 | 0.002324377 |
| ANXA2          | 1.12E-07 | 0.737851865  | 0.739 | 0.489 | 0.00243321  |
| CYCS           | 1.15E-07 | 0.876117391  | 0.413 | 0.135 | 0.002498133 |
| B4GALT5        | 1.34E-07 | 0.590919075  | 0.348 | 0.071 | 0.002920627 |
| C11orf96       | 1.40E-07 | 0.776510777  | 0.62  | 0.305 | 0.003042988 |
| CLIC1          | 1.69E-07 | 0.660844716  | 0.783 | 0.582 | 0.003682    |
| S1PR1          | 2.01E-07 | 0.821672141  | 0.609 | 0.34  | 0.004376514 |
| DUSP6          | 2.88E-07 | 0.724556944  | 0.761 | 0.511 | 0.006290039 |
| TSC22D3        | 2.93E-07 | -0.699018434 | 0.25  | 0.596 | 0.00637961  |
| SAT1           | 2.95E-07 | 0.66052038   | 0.978 | 0.872 | 0.006439592 |
| RTKL1-TNFRSF6B | 3.16E-07 | 0.717985829  | 0.174 | 0     | 0.006890308 |
| TEAD4          | 3.18E-07 | 0.819501456  | 0.326 | 0.078 | 0.006933439 |
| CYR61          | 3.24E-07 | 0.744046613  | 0.38  | 0.099 | 0.007070251 |
| CXCL8          | 3.73E-07 | 1.463280254  | 0.25  | 0.035 | 0.008138169 |
| ZFP36L1        | 4.19E-07 | -0.77826407  | 0.37  | 0.681 | 0.009143898 |
| LDLR           | 4.90E-07 | 0.853477746  | 0.337 | 0.078 | 0.010689574 |
| RAN            | 5.36E-07 | 0.692567981  | 0.5   | 0.206 | 0.011696075 |
| GJA4           | 5.66E-07 | 0.884709307  | 0.489 | 0.191 | 0.0123498   |
| RIN2           | 7.32E-07 | 0.880436066  | 0.467 | 0.206 | 0.015971221 |
| ZNF593         | 7.72E-07 | 0.636406602  | 0.293 | 0.057 | 0.016845687 |
| PLIN2          | 7.74E-07 | 0.767733069  | 0.63  | 0.355 | 0.016887927 |
| MYL6           | 8.07E-07 | 0.399085573  | 0.967 | 0.872 | 0.017591046 |
| IL32           | 8.54E-07 | 0.952242754  | 0.38  | 0.121 | 0.01862278  |
| TOP1           | 9.13E-07 | 0.724480474  | 0.489 | 0.206 | 0.019911586 |
| ARPC5L         | 9.25E-07 | 0.760459213  | 0.402 | 0.135 | 0.020174291 |
| EFNA1          | 1.02E-06 | -0.631009061 | 0.25  | 0.574 | 0.022241772 |
| PDK4           | 1.10E-06 | -0.800307387 | 0.533 | 0.766 | 0.023960022 |
| PHLDB1         | 1.13E-06 | 0.610838259  | 0.228 | 0.028 | 0.024704961 |
| TINAGL1        | 1.14E-06 | 0.550335495  | 0.804 | 0.61  | 0.024812234 |
| YBX3           | 1.14E-06 | 0.429960224  | 0.489 | 0.191 | 0.024943357 |
| ID2            | 1.24E-06 | -0.914264472 | 0.359 | 0.638 | 0.027036677 |
| SEMA6B         | 1.32E-06 | 0.674189644  | 0.413 | 0.142 | 0.02887235  |
| PVR            | 1.41E-06 | 0.548160461  | 0.239 | 0.035 | 0.030679323 |
| POMP           | 1.50E-06 | 0.564923907  | 0.793 | 0.61  | 0.032618821 |
| PLXNA2         | 1.53E-06 | 0.577564217  | 0.228 | 0.028 | 0.033276063 |
| SRGN           | 1.54E-06 | 0.674303701  | 0.848 | 0.702 | 0.033688104 |
| PFDN2          | 1.58E-06 | 0.744175127  | 0.489 | 0.227 | 0.034453466 |

|          |          |             |       |       |             |
|----------|----------|-------------|-------|-------|-------------|
| SELK     | 1.71E-06 | 0.890291522 | 0.543 | 0.326 | 0.037336388 |
| IGLV6-57 | 1.92E-06 | 0.471038718 | 0.152 | 0     | 0.041766705 |
| IMP4     | 1.95E-06 | 0.578364612 | 0.217 | 0.028 | 0.042533474 |

List of differentially expressed genes of MGP\_VEC in overall stage (PR versus PP)

| gene        | p_val    | avg_logFC    | pct.1 | pct.2 | p_val_adj |
|-------------|----------|--------------|-------|-------|-----------|
| EMP1        | 3.62E-29 | 1.914544324  | 0.968 | 0.512 | 7.89E-25  |
| AKAP12      | 2.04E-26 | 2.261026963  | 0.912 | 0.214 | 4.45E-22  |
| HSPA1A      | 2.88E-25 | 1.758810577  | 0.968 | 0.631 | 6.28E-21  |
| LMNA        | 1.22E-24 | 1.845296503  | 0.912 | 0.464 | 2.67E-20  |
| PNP         | 5.18E-24 | 1.684540987  | 0.904 | 0.321 | 1.13E-19  |
| HSPA1B      | 1.03E-23 | 1.746683038  | 0.936 | 0.56  | 2.26E-19  |
| HSP90AA1    | 2.85E-23 | 1.720553993  | 0.928 | 0.631 | 6.22E-19  |
| TIMP1       | 4.92E-23 | 2.223479316  | 0.976 | 0.976 | 1.07E-18  |
| ADAMTS9     | 3.65E-22 | 1.919498989  | 0.784 | 0.107 | 7.97E-18  |
| HSPB1       | 3.22E-20 | 1.254329149  | 0.984 | 0.952 | 7.02E-16  |
| ANGPTL4     | 4.45E-20 | 1.806999476  | 0.824 | 0.274 | 9.70E-16  |
| HES4        | 6.04E-20 | 1.797257778  | 0.72  | 0.071 | 1.32E-15  |
| MYADM       | 8.85E-20 | 1.575149714  | 0.832 | 0.321 | 1.93E-15  |
| DDIT4       | 1.69E-19 | -1.274691998 | 0.656 | 0.952 | 3.68E-15  |
| MT2A        | 1.73E-19 | 2.249516482  | 0.976 | 0.869 | 3.76E-15  |
| UPP1        | 5.70E-19 | 1.495276548  | 0.8   | 0.25  | 1.24E-14  |
| TXNIP       | 3.98E-18 | -1.213454834 | 0.136 | 0.702 | 8.68E-14  |
| HSP90AB1    | 4.39E-18 | 0.899210702  | 0.976 | 0.917 | 9.58E-14  |
| TM4SF1      | 5.87E-18 | 0.966274572  | 1     | 0.976 | 1.28E-13  |
| DDX21       | 1.16E-17 | 1.371157716  | 0.752 | 0.19  | 2.54E-13  |
| MYC         | 3.35E-17 | 1.397961172  | 0.848 | 0.405 | 7.31E-13  |
| FOSL1       | 6.87E-17 | 1.45954826   | 0.6   | 0.024 | 1.50E-12  |
| SAT1        | 8.57E-17 | 1.221982364  | 0.992 | 0.821 | 1.87E-12  |
| THBD        | 1.08E-16 | 1.317311397  | 0.832 | 0.405 | 2.36E-12  |
| BAG3        | 1.37E-16 | 1.708520776  | 0.744 | 0.25  | 2.98E-12  |
| TSC22D3     | 1.52E-16 | -1.106924921 | 0.448 | 0.81  | 3.31E-12  |
| HSPH1       | 4.41E-16 | 1.549751731  | 0.704 | 0.214 | 9.62E-12  |
| ADAMTS4     | 4.52E-16 | 1.424992606  | 0.776 | 0.25  | 9.86E-12  |
| ID3         | 9.85E-16 | -0.983341188 | 0.776 | 0.976 | 2.15E-11  |
| PLAUR       | 1.28E-15 | 1.468682407  | 0.656 | 0.095 | 2.78E-11  |
| C11orf96    | 5.73E-15 | 1.385393289  | 0.816 | 0.381 | 1.25E-10  |
| VCAM1       | 1.69E-14 | 1.723387535  | 0.68  | 0.19  | 3.68E-10  |
| JUND        | 3.55E-14 | 1.052326916  | 0.848 | 0.381 | 7.74E-10  |
| ID1         | 3.98E-14 | -0.871516119 | 0.864 | 1     | 8.68E-10  |
| ID2         | 5.75E-14 | -0.927926288 | 0.496 | 0.857 | 1.25E-09  |
| MIR4435-2HG | 8.62E-14 | 1.316460441  | 0.648 | 0.155 | 1.88E-09  |
| TNFRSF12A   | 1.83E-13 | 1.223342514  | 0.48  | 0     | 4.00E-09  |
| HSPE1       | 1.88E-13 | 1.460311716  | 0.76  | 0.357 | 4.11E-09  |
| HSPD1       | 3.39E-13 | 1.471960843  | 0.752 | 0.417 | 7.40E-09  |
| MAT2A       | 5.35E-13 | 1.243240482  | 0.696 | 0.25  | 1.17E-08  |
| MCL1        | 6.00E-13 | 0.99571369   | 0.816 | 0.464 | 1.31E-08  |
| GIMAP4      | 8.49E-13 | -0.941033833 | 0.344 | 0.762 | 1.85E-08  |
| LDLR        | 9.88E-13 | 0.993971316  | 0.528 | 0.06  | 2.15E-08  |
| HES1        | 9.97E-13 | -1.003969291 | 0.232 | 0.679 | 2.17E-08  |
| SH3BGR13    | 1.04E-12 | 0.83814979   | 0.888 | 0.702 | 2.26E-08  |
| KDM6B       | 1.36E-12 | 1.22657878   | 0.616 | 0.167 | 2.96E-08  |
| ADAMTS1     | 2.46E-12 | 1.013967812  | 0.88  | 0.595 | 5.37E-08  |
| ACKR3       | 3.99E-12 | 1.101531381  | 0.52  | 0.06  | 8.69E-08  |
| GIMAP7      | 4.53E-12 | -0.886263079 | 0.168 | 0.643 | 9.87E-08  |
| RHOB        | 4.80E-12 | -1.012622324 | 0.664 | 0.857 | 1.05E-07  |
| CYCS        | 6.05E-12 | 0.932998018  | 0.648 | 0.179 | 1.32E-07  |
| TCEB1       | 6.37E-12 | 1.051512637  | 0.792 | 0.476 | 1.39E-07  |
| MT1X        | 8.18E-12 | 2.042205303  | 0.752 | 0.405 | 1.78E-07  |
| LITAF       | 9.30E-12 | 1.126552661  | 0.72  | 0.369 | 2.03E-07  |
| PIM3        | 1.40E-11 | -0.811599767 | 0.112 | 0.536 | 3.05E-07  |
| EVA1C       | 4.18E-11 | 0.944071531  | 0.68  | 0.25  | 9.11E-07  |
| RNASE1      | 4.20E-11 | -0.624245441 | 0.896 | 1     | 9.16E-07  |
| MT1M        | 4.27E-11 | 2.117678159  | 0.64  | 0.214 | 9.30E-07  |
| RALGDS      | 4.64E-11 | 1.052394948  | 0.52  | 0.095 | 1.01E-06  |
| CD59        | 6.14E-11 | 0.650925628  | 0.944 | 0.762 | 1.34E-06  |
| IL6         | 1.03E-10 | 1.883235978  | 0.408 | 0.012 | 2.25E-06  |

|           |          |              |       |       |             |
|-----------|----------|--------------|-------|-------|-------------|
| MT1A      | 1.32E-10 | 1.953248173  | 0.488 | 0.083 | 2.88E-06    |
| TFPI2     | 1.39E-10 | 1.462079162  | 0.576 | 0.167 | 3.03E-06    |
| SERPINB9  | 1.69E-10 | 1.087368269  | 0.632 | 0.226 | 3.69E-06    |
| GIMAP1    | 2.54E-10 | -0.97236143  | 0.24  | 0.607 | 5.53E-06    |
| EFNA1     | 3.02E-10 | -0.69895265  | 0.512 | 0.833 | 6.59E-06    |
| WARS      | 3.69E-10 | 1.01067293   | 0.72  | 0.393 | 8.05E-06    |
| NOS3      | 4.89E-10 | 1.064291914  | 0.608 | 0.238 | 1.07E-05    |
| INSIG1    | 5.28E-10 | 1.317962942  | 0.592 | 0.214 | 1.15E-05    |
| JMJD1C    | 5.40E-10 | 0.892179056  | 0.816 | 0.476 | 1.18E-05    |
| MECOM     | 5.45E-10 | -0.906608687 | 0.224 | 0.607 | 1.19E-05    |
| CYR61     | 5.98E-10 | 1.346888573  | 0.504 | 0.095 | 1.30E-05    |
| DEFA3     | 6.76E-10 | -0.877511258 | 0.064 | 0.429 | 1.47E-05    |
| TRIB1     | 7.86E-10 | 0.97576262   | 0.456 | 0.071 | 1.71E-05    |
| KIAA1551  | 9.04E-10 | -0.613203841 | 0.016 | 0.31  | 1.97E-05    |
| ICAM1     | 9.35E-10 | 1.623437865  | 0.64  | 0.286 | 2.04E-05    |
| SGMS2     | 9.86E-10 | 0.909742807  | 0.4   | 0.024 | 2.15E-05    |
| TUBB6     | 1.01E-09 | 0.978852611  | 0.608 | 0.238 | 2.20E-05    |
| HSPA8     | 1.10E-09 | 0.800909199  | 0.888 | 0.786 | 2.40E-05    |
| HSPA5     | 2.01E-09 | 1.484857708  | 0.8   | 0.56  | 4.38E-05    |
| SBNO2     | 2.04E-09 | 1.025162644  | 0.4   | 0.036 | 4.45E-05    |
| CDC42EP2  | 2.18E-09 | 0.872792158  | 0.456 | 0.083 | 4.75E-05    |
| RSRP1     | 2.53E-09 | -0.77058974  | 0.32  | 0.702 | 5.52E-05    |
| NEAT1     | 2.93E-09 | 0.712599434  | 0.952 | 0.857 | 6.39E-05    |
| HMGA1     | 3.26E-09 | 0.894219005  | 0.392 | 0.036 | 7.11E-05    |
| LDB2      | 3.33E-09 | -0.602308653 | 0.728 | 0.881 | 7.26E-05    |
| PLPP3     | 3.40E-09 | 0.690932212  | 0.912 | 0.786 | 7.41E-05    |
| FOSL2     | 4.03E-09 | 0.826452109  | 0.48  | 0.107 | 8.79E-05    |
| 7-Sep     | 5.13E-09 | -0.630549081 | 0.344 | 0.714 | 0.000111957 |
| FLT1      | 5.30E-09 | 0.846286032  | 0.744 | 0.357 | 0.000115683 |
| SPHK1     | 6.92E-09 | 0.795619034  | 0.328 | 0     | 0.000150925 |
| CHIC2     | 1.12E-08 | 0.827293745  | 0.68  | 0.321 | 0.00024494  |
| MIDN      | 1.28E-08 | 0.885003512  | 0.696 | 0.405 | 0.000280172 |
| GJA1      | 1.33E-08 | 0.915377438  | 0.36  | 0.024 | 0.000289626 |
| EIF1      | 1.53E-08 | 0.359818988  | 1     | 1     | 0.000333348 |
| ATP1A1    | 1.81E-08 | 0.814813183  | 0.784 | 0.56  | 0.000395514 |
| CCL2      | 1.98E-08 | 1.474310084  | 0.576 | 0.19  | 0.000430756 |
| GCC2      | 2.12E-08 | -0.616313916 | 0.064 | 0.381 | 0.000462536 |
| NOP16     | 2.36E-08 | 0.869169277  | 0.432 | 0.083 | 0.000514715 |
| FAM212A   | 2.38E-08 | -0.537725756 | 0.008 | 0.25  | 0.000518825 |
| SNRPB     | 3.00E-08 | 0.738702924  | 0.664 | 0.31  | 0.000654572 |
| EIF3I     | 3.07E-08 | 0.68711924   | 0.68  | 0.393 | 0.000670428 |
| SOX17     | 3.22E-08 | 0.962953236  | 0.664 | 0.333 | 0.000703157 |
| NOLC1     | 3.47E-08 | 0.753911512  | 0.512 | 0.155 | 0.000757276 |
| SOX4      | 3.85E-08 | 0.915639363  | 0.736 | 0.536 | 0.000838877 |
| HBB       | 4.59E-08 | -2.04883427  | 0.096 | 0.429 | 0.001001548 |
| RELB      | 4.66E-08 | 0.743696581  | 0.352 | 0.036 | 0.001016373 |
| B2M       | 4.76E-08 | -0.279967437 | 1     | 1     | 0.001038183 |
| TMEM70    | 4.79E-08 | 0.834791348  | 0.528 | 0.167 | 0.001044803 |
| PCMTD1    | 5.81E-08 | -0.665111848 | 0.28  | 0.631 | 0.001267672 |
| ARID5A    | 6.29E-08 | 0.847703815  | 0.512 | 0.179 | 0.001371318 |
| DUSP6     | 6.61E-08 | 0.764911351  | 0.84  | 0.631 | 0.001441838 |
| PDLIM4    | 6.99E-08 | 0.892184432  | 0.328 | 0.024 | 0.001523699 |
| TSC22D1   | 7.12E-08 | 1.053245574  | 0.584 | 0.25  | 0.001553597 |
| TMEM204   | 7.45E-08 | -0.672470329 | 0.16  | 0.488 | 0.001624956 |
| HNRNPU    | 7.49E-08 | 0.823062577  | 0.704 | 0.417 | 0.001633477 |
| NPY1R     | 7.72E-08 | -0.768444131 | 0.192 | 0.524 | 0.00168258  |
| CALHM2    | 8.45E-08 | -0.542549596 | 0.072 | 0.369 | 0.001843526 |
| LINC00152 | 8.62E-08 | 0.979422705  | 0.544 | 0.226 | 0.001880851 |
| MALL      | 8.84E-08 | 0.866224941  | 0.496 | 0.167 | 0.001928893 |
| SLCO4A1   | 9.50E-08 | 0.786196714  | 0.416 | 0.083 | 0.002071385 |
| SNHG7     | 9.90E-08 | -0.561832328 | 0.68  | 0.869 | 0.002158734 |
| BIRC3     | 1.01E-07 | 0.983082716  | 0.368 | 0.048 | 0.002209254 |
| STX11     | 1.11E-07 | 0.610013834  | 0.304 | 0.012 | 0.002430984 |
| 3-Mar     | 1.16E-07 | 0.68463299   | 0.328 | 0.024 | 0.002538806 |
| NR2F2-AS1 | 1.18E-07 | -0.597994672 | 0.04  | 0.298 | 0.002565469 |
| GADD45A   | 1.18E-07 | 0.761374664  | 0.592 | 0.262 | 0.00256643  |
| S100A6    | 1.32E-07 | 0.83170852   | 0.92  | 0.881 | 0.002883991 |
| TCEAL8    | 1.43E-07 | -0.598516395 | 0.184 | 0.536 | 0.003114926 |
| FLRT2     | 1.43E-07 | -0.756132603 | 0.176 | 0.5   | 0.003125826 |
| RUNX1T1   | 1.54E-07 | -0.658769643 | 0.04  | 0.298 | 0.003364324 |

|                |          |              |       |       |             |
|----------------|----------|--------------|-------|-------|-------------|
| NAMPT          | 1.66E-07 | 0.789552389  | 0.816 | 0.631 | 0.003625971 |
| SDPR           | 1.73E-07 | -0.581524619 | 0.592 | 0.857 | 0.003767679 |
| STC1           | 1.76E-07 | 1.212831494  | 0.512 | 0.179 | 0.003839012 |
| SOD2           | 2.07E-07 | 1.161873211  | 0.576 | 0.286 | 0.004517174 |
| PLK3           | 2.40E-07 | 0.756053373  | 0.4   | 0.083 | 0.005223481 |
| CLEC14A        | 2.51E-07 | -0.555928301 | 0.776 | 0.869 | 0.005466594 |
| NXT1           | 3.03E-07 | 0.760771054  | 0.416 | 0.107 | 0.006613906 |
| POMP           | 3.22E-07 | 0.60620126   | 0.848 | 0.619 | 0.007024755 |
| PELI1          | 3.47E-07 | 0.748414554  | 0.52  | 0.179 | 0.007560034 |
| CXCL8          | 3.53E-07 | 1.183620182  | 0.264 | 0     | 0.007706946 |
| EHD4           | 3.63E-07 | 0.736041858  | 0.528 | 0.214 | 0.007914361 |
| CLDN5          | 3.67E-07 | -0.713985294 | 0.504 | 0.75  | 0.008005321 |
| ZFP36L1        | 3.89E-07 | -0.713379991 | 0.512 | 0.75  | 0.008476685 |
| CLCF1          | 3.90E-07 | 0.71875436   | 0.288 | 0.012 | 0.008504043 |
| HMGB2          | 4.13E-07 | -0.631197458 | 0.168 | 0.488 | 0.009004628 |
| ITGA5          | 4.15E-07 | 0.776140465  | 0.704 | 0.417 | 0.009040273 |
| BMP4           | 4.21E-07 | -0.62646022  | 0.008 | 0.214 | 0.00917997  |
| NEDD9          | 4.30E-07 | 0.739916631  | 0.52  | 0.202 | 0.009369568 |
| C6orf136       | 4.31E-07 | -0.42475684  | 0.008 | 0.214 | 0.009407844 |
| GPC1           | 4.56E-07 | 0.677398635  | 0.28  | 0.012 | 0.009946593 |
| CIRBP          | 4.60E-07 | -0.462860638 | 0.648 | 0.857 | 0.010037431 |
| NR2F2          | 4.62E-07 | -0.550825542 | 0.552 | 0.786 | 0.010084789 |
| CYYR1          | 4.81E-07 | -0.535537519 | 0.464 | 0.762 | 0.010489415 |
| RTKL1-TNFRSF6B | 5.19E-07 | 1.017029628  | 0.28  | 0.012 | 0.011321677 |
| GABARAP        | 5.32E-07 | -0.40046332  | 0.768 | 0.917 | 0.011598877 |
| TINAGL1        | 5.58E-07 | 0.549319674  | 0.864 | 0.738 | 0.01217781  |
| ARHGAP23       | 5.82E-07 | 0.789043718  | 0.408 | 0.107 | 0.012695735 |
| DLC1           | 5.99E-07 | 0.776304166  | 0.656 | 0.429 | 0.013058819 |
| ARHGDI1        | 6.06E-07 | -0.60326666  | 0.408 | 0.714 | 0.013212325 |
| MIR222HG       | 6.27E-07 | 0.85960328   | 0.376 | 0.083 | 0.013680922 |
| EGFL7          | 6.74E-07 | -0.449755917 | 0.672 | 0.917 | 0.014690736 |
| RAPGEF5        | 7.19E-07 | 0.735116332  | 0.696 | 0.417 | 0.015672947 |
| HBEGF          | 7.70E-07 | 0.901357755  | 0.496 | 0.19  | 0.016797235 |
| STOM           | 7.79E-07 | 0.520369706  | 0.896 | 0.774 | 0.016992871 |
| LRRC32         | 8.16E-07 | 0.74504927   | 0.68  | 0.429 | 0.017799843 |
| RPS4X          | 8.60E-07 | -0.302132103 | 0.984 | 0.988 | 0.018763019 |
| MESDC1         | 1.06E-06 | 0.714915123  | 0.464 | 0.143 | 0.023121151 |
| MAFF           | 1.19E-06 | 0.843341169  | 0.424 | 0.131 | 0.025874268 |
| SERPINE1       | 1.21E-06 | 1.156023107  | 0.472 | 0.19  | 0.026424769 |
| ETS2           | 1.23E-06 | 0.628370517  | 0.784 | 0.631 | 0.026819993 |
| BTG1           | 1.32E-06 | -0.559549028 | 0.528 | 0.774 | 0.028687383 |
| ZNHIT1         | 1.32E-06 | -0.539751268 | 0.312 | 0.643 | 0.028888671 |
| EIF3J          | 1.34E-06 | 0.611817907  | 0.392 | 0.095 | 0.029164828 |
| INHBB          | 1.42E-06 | 0.706102431  | 0.352 | 0.071 | 0.030943008 |
| MTIF3          | 1.43E-06 | -0.557289227 | 0.072 | 0.321 | 0.031224047 |
| CUTC           | 1.45E-06 | -0.442663991 | 0.032 | 0.25  | 0.031617375 |
| NEIL1          | 1.48E-06 | -0.366966959 | 0.04  | 0.274 | 0.032364631 |
| NPDC1          | 1.54E-06 | -0.487208734 | 0.632 | 0.869 | 0.033637517 |
| MIS18BP1       | 1.54E-06 | -0.380448333 | 0.04  | 0.274 | 0.033666061 |
| NMRK1          | 1.58E-06 | -0.532260535 | 0.152 | 0.452 | 0.034358774 |
| AP2A2          | 1.62E-06 | -0.570570787 | 0.08  | 0.333 | 0.035377261 |
| ANXA1          | 1.64E-06 | 1.207034239  | 0.528 | 0.238 | 0.035722332 |
| TNFRSF10B      | 1.66E-06 | 0.718935961  | 0.504 | 0.226 | 0.036289736 |
| SLC40A1        | 1.70E-06 | -0.533598973 | 0.312 | 0.607 | 0.03714284  |
| KDELR1         | 1.71E-06 | -0.615222354 | 0.384 | 0.667 | 0.037381242 |
| IL33           | 1.81E-06 | -0.386397641 | 0.848 | 0.929 | 0.039466701 |
| HEY1           | 1.97E-06 | -0.628678059 | 0.136 | 0.429 | 0.042863933 |
| ACTB           | 2.07E-06 | 0.585559008  | 0.976 | 0.929 | 0.045165389 |
| TNFSF10        | 2.09E-06 | -0.650638625 | 0.248 | 0.524 | 0.045475922 |
| CD93           | 2.11E-06 | 0.718565507  | 0.616 | 0.345 | 0.045974908 |
| CYP11B1        | 2.23E-06 | 0.879105093  | 0.304 | 0.036 | 0.048678576 |

List of differentially expressed genes of NUPR1 LSEC in overall stage (PR versus PP)

| gene   | p val    | avg logFC    | pct.1 | pct.2 | p val adj |
|--------|----------|--------------|-------|-------|-----------|
| HSPA1A | 2.01E-16 | 3.315134076  | 0.968 | 0.121 | 4.39E-12  |
| HBB    | 5.14E-16 | -2.202700453 | 0     | 0.606 | 1.12E-11  |
| HSPA1B | 3.88E-14 | 2.539966557  | 0.914 | 0.061 | 8.47E-10  |

|          |          |              |       |       |             |
|----------|----------|--------------|-------|-------|-------------|
| HSPE1    | 2.85E-13 | 2.565153353  | 0.871 | 0.121 | 6.22E-09    |
| HSPB1    | 1.92E-12 | 1.774279957  | 0.957 | 0.636 | 4.19E-08    |
| DNAJB1   | 6.51E-11 | 2.17147638   | 0.828 | 0.121 | 1.42E-06    |
| DEFA3    | 1.04E-10 | -1.311013185 | 0.065 | 0.606 | 2.26E-06    |
| HSP90AA1 | 1.77E-10 | 1.657276449  | 0.871 | 0.333 | 3.86E-06    |
| BAG3     | 1.16E-09 | 2.521902717  | 0.667 | 0     | 2.52E-05    |
| HSPD1    | 1.16E-09 | 1.952143225  | 0.774 | 0.212 | 2.53E-05    |
| MT2A     | 7.87E-09 | 1.980138351  | 0.882 | 0.606 | 0.000171692 |
| CDKN1A   | 1.29E-08 | 2.007963575  | 0.688 | 0.091 | 0.000280992 |
| HSPH1    | 1.09E-07 | 1.882457249  | 0.602 | 0.03  | 0.002382171 |
| SAT1     | 2.01E-07 | 1.183230858  | 0.86  | 0.485 | 0.004387762 |
| IGKV2-24 | 3.02E-07 | -1.194478822 | 0.011 | 0.303 | 0.006575704 |
| MCL1     | 5.50E-07 | 1.804918026  | 0.548 | 0.03  | 0.011987457 |
| SDF2L1   | 2.25E-06 | 1.742949054  | 0.473 | 0     | 0.049013651 |

List of differentially expressed genes of RBP7 VEC in overall stage (PR versus PP)

| gene     | p val    | avg logFC    | pct.1 | pct.2 | p val adj   |
|----------|----------|--------------|-------|-------|-------------|
| HSPA1A   | 3.90E-20 | 1.995712448  | 1     | 0.75  | 8.50E-16    |
| HSPA1B   | 5.21E-20 | 1.966408592  | 1     | 0.533 | 1.14E-15    |
| HSPB1    | 3.01E-17 | 1.496569712  | 1     | 0.933 | 6.57E-13    |
| HSP90AA1 | 2.23E-15 | 1.674360591  | 0.957 | 0.783 | 4.86E-11    |
| HSP90AB1 | 2.02E-14 | 1.084708336  | 0.986 | 0.833 | 4.39E-10    |
| HSPE1    | 1.08E-13 | 1.962034451  | 0.871 | 0.433 | 2.36E-09    |
| BAG3     | 2.14E-13 | 1.647272269  | 0.857 | 0.317 | 4.66E-09    |
| ID3      | 2.25E-13 | -1.485550627 | 0.643 | 0.933 | 4.90E-09    |
| ADAMTS9  | 1.38E-12 | 1.480488468  | 0.729 | 0.1   | 3.00E-08    |
| HSPH1    | 2.65E-11 | 1.686477716  | 0.743 | 0.25  | 5.77E-07    |
| HBB      | 3.61E-11 | -1.388883469 | 0.043 | 0.567 | 7.86E-07    |
| PNP      | 4.64E-11 | 1.455823458  | 0.829 | 0.4   | 1.01E-06    |
| DEFA3    | 7.95E-11 | -1.007446675 | 0     | 0.483 | 1.73E-06    |
| DDIT4    | 1.18E-10 | -0.983764682 | 0.7   | 0.933 | 2.57E-06    |
| HSPD1    | 1.42E-10 | 1.810096127  | 0.757 | 0.317 | 3.09E-06    |
| MCL1     | 1.66E-10 | 1.217904034  | 0.857 | 0.433 | 3.62E-06    |
| ARID5A   | 1.80E-10 | 1.143167228  | 0.657 | 0.117 | 3.92E-06    |
| EMP1     | 4.14E-10 | 1.226969593  | 0.9   | 0.667 | 9.03E-06    |
| AKAP12   | 8.04E-10 | 1.815511764  | 0.729 | 0.267 | 1.75E-05    |
| DNAJB1   | 1.32E-09 | 1.450443169  | 0.9   | 0.633 | 2.87E-05    |
| SPRY1    | 4.67E-09 | 1.399544754  | 0.8   | 0.433 | 0.000101821 |
| DDX5     | 6.31E-09 | 0.570200306  | 0.986 | 0.867 | 0.00013765  |
| ADAMTS4  | 7.53E-09 | 1.359579421  | 0.557 | 0.083 | 0.000164182 |
| B2M      | 1.07E-08 | -0.366285386 | 1     | 1     | 0.00023424  |
| THBD     | 1.18E-08 | 1.099065336  | 0.9   | 0.55  | 0.000258125 |
| INSIG1   | 1.45E-08 | 1.224843797  | 0.629 | 0.167 | 0.000316831 |
| FOSL1    | 1.62E-08 | 0.95386754   | 0.471 | 0.033 | 0.00035256  |
| MT2A     | 1.65E-08 | 2.0250407    | 0.957 | 0.817 | 0.000360121 |
| JUND     | 4.08E-08 | 0.895863875  | 0.843 | 0.383 | 0.000890787 |
| ITM2B    | 6.63E-08 | -0.504800607 | 0.971 | 1     | 0.001444987 |
| DDX21    | 8.26E-08 | 0.993251432  | 0.6   | 0.167 | 0.001801486 |
| HSPA5    | 1.21E-07 | 1.385141655  | 0.814 | 0.517 | 0.002631283 |
| MAFF     | 2.32E-07 | 0.867225243  | 0.571 | 0.133 | 0.005048809 |
| TXNIP    | 2.50E-07 | -0.965196219 | 0.271 | 0.7   | 0.005452367 |
| SLCO4A1  | 2.68E-07 | 1.108919137  | 0.6   | 0.183 | 0.005845723 |
| PDLIM1   | 3.02E-07 | 0.881746464  | 0.843 | 0.55  | 0.006589515 |
| PLAUR    | 5.27E-07 | 1.119776483  | 0.471 | 0.083 | 0.011501592 |
| GJA1     | 5.95E-07 | 0.860099206  | 0.614 | 0.217 | 0.012973131 |
| PTPRE    | 7.29E-07 | 0.735611448  | 0.471 | 0.067 | 0.015890463 |
| ID1      | 8.63E-07 | -0.71230613  | 0.914 | 0.967 | 0.018819461 |
| NDRG1    | 9.47E-07 | 0.755915304  | 0.743 | 0.35  | 0.020659984 |
| MIDN     | 9.84E-07 | 0.717905191  | 0.729 | 0.3   | 0.021459747 |
| ITPRIP   | 1.20E-06 | 0.782370502  | 0.557 | 0.15  | 0.026068294 |
| CDKN1A   | 1.22E-06 | 1.036480619  | 0.8   | 0.533 | 0.026514833 |
| RNASE1   | 1.45E-06 | -0.613702273 | 0.914 | 0.967 | 0.031653171 |
| RHOB     | 1.88E-06 | -0.65434824  | 0.729 | 0.95  | 0.04103292  |
| TCEB1    | 1.89E-06 | 0.783034315  | 0.743 | 0.433 | 0.041312436 |
| FOSL2    | 1.96E-06 | 0.846379115  | 0.643 | 0.267 | 0.042716821 |
| PGS1     | 2.03E-06 | 0.839567502  | 0.486 | 0.1   | 0.044255549 |

List of differentially expressed genes of PTGDS\_VEC in overall stage (PR versus PP)

| gene | p_val | avg_logFC | pct.1 | pct.2 | p_val_adj |
|------|-------|-----------|-------|-------|-----------|
| NA   |       |           |       |       |           |



**Table 13: List of DEGs of endothelial cell clusters in cold preservation stage (EP versus PP)**

List of differentially expressed genes of CSTL\_LSEC in cold preservation stage (EP versus PP)

| gene     | p_val    | avg_logFC   | pct.1 | pct.2 | p_val_adj   |
|----------|----------|-------------|-------|-------|-------------|
| HSPA1A   | 1.62E-08 | 0.710079822 | 0.886 | 0.867 | 0.000353832 |
| NR4A1    | 5.60E-08 | 0.644171033 | 0.727 | 0.517 | 0.001221756 |
| HSP90AA1 | 1.90E-07 | 0.423006152 | 0.932 | 0.916 | 0.004138503 |
| IGLV2-14 | 1.92E-06 | 0.391312504 | 0.333 | 0.119 | 0.041843967 |

List of differentially expressed genes of STAB1\_LSEC in cold preservation stage (EP versus PP)

| gene     | p_val    | avg_logFC   | pct.1 | pct.2 | p_val_adj   |
|----------|----------|-------------|-------|-------|-------------|
| HLA-E    | 3.22E-09 | 0.525579789 | 0.967 | 0.837 | 7.02E-05    |
| IGLV2-23 | 7.59E-09 | 0.809476818 | 0.246 | 0.007 | 0.000165527 |

List of differentially expressed genes of MGP\_VEC in cold preservation stage (EP versus PP)

| gene  | p_val    | avg_logFC   | pct.1 | pct.2 | p_val_adj   |
|-------|----------|-------------|-------|-------|-------------|
| NR4A1 | 1.63E-09 | 1.042934813 | 0.836 | 0.44  | 3.56E-05    |
| MCL1  | 2.78E-08 | 0.818922923 | 0.822 | 0.464 | 0.000606995 |
| ZFP36 | 1.23E-06 | 0.615940204 | 0.986 | 0.81  | 0.026794727 |

List of differentially expressed genes of NUPR1\_LSEC in cold preservation stage (EP versus PP)

| gene     | p_val    | avg_logFC    | pct.1 | pct.2 | p_val_adj   |
|----------|----------|--------------|-------|-------|-------------|
| IGKV2-24 | 1.78E-07 | -1.122856794 | 0.018 | 0.303 | 0.003881966 |

**Table 14. List of markers information for NK/T cell clusters, related to Figure 5.**

|    | p val     | avg logFC   | pct.1 | pct.2 | p val adj   | gene       | cluster | cell type    |
|----|-----------|-------------|-------|-------|-------------|------------|---------|--------------|
| 1  | 1.83E-200 | 1.13183676  | 0.523 | 0.148 | 3.98E-196   | CD8B       | 1       | CD8B_CD8 Tem |
| 2  | 9.84E-214 | 1.0841216   | 0.794 | 0.377 | 2.15E-209   | GZMK       | 1       | CD8B_CD8 Tem |
| 3  | 2.88E-120 | 0.9700973   | 0.602 | 0.298 | 6.28E-116   | RGS1       | 1       | CD8B_CD8 Tem |
| 4  | 1.02E-149 | 0.85348292  | 0.71  | 0.349 | 2.23E-145   | CD8A       | 1       | CD8B_CD8 Tem |
| 5  | 2.15E-79  | 0.72331749  | 0.448 | 0.213 | 4.69E-75    | COTL1      | 1       | CD8B_CD8 Tem |
| 6  | 2.73E-73  | 0.71519443  | 0.347 | 0.142 | 5.96E-69    | CD27       | 1       | CD8B_CD8 Tem |
| 7  | 3.47E-49  | 0.67694018  | 0.323 | 0.155 | 7.57E-45    | CRTAM      | 1       | CD8B_CD8 Tem |
| 8  | 7.99E-38  | 0.59918757  | 0.454 | 0.274 | 1.74E-33    | XCL2       | 1       | CD8B_CD8 Tem |
| 9  | 6.77E-63  | 0.58963336  | 0.192 | 0.05  | 1.48E-58    | PDCD1      | 1       | CD8B_CD8 Tem |
| 10 | 4.60E-35  | 0.53778914  | 0.294 | 0.163 | 1.00E-30    | SRRT       | 1       | CD8B_CD8 Tem |
| 11 | 2.04E-33  | 0.53454179  | 0.445 | 0.316 | 4.44E-29    | ITM2A      | 1       | CD8B_CD8 Tem |
| 12 | 8.27E-79  | 0.53013441  | 0.718 | 0.45  | 1.80E-74    | CD3D       | 1       | CD8B_CD8 Tem |
| 13 | 2.10E-33  | 0.52754216  | 0.304 | 0.166 | 4.57E-29    | HLA-DQA1   | 1       | CD8B_CD8 Tem |
| 14 | 3.07E-23  | 0.51070613  | 0.293 | 0.181 | 6.70E-19    | HLA-DRA    | 1       | CD8B_CD8 Tem |
| 15 | 2.64E-21  | 0.5056277   | 0.275 | 0.176 | 5.75E-17    | FABP5      | 1       | CD8B_CD8 Tem |
| 16 | 1.70E-27  | 0.49388854  | 0.44  | 0.323 | 3.70E-23    | SAMSN1     | 1       | CD8B_CD8 Tem |
| 17 | 3.54E-25  | 0.48844868  | 0.423 | 0.32  | 7.73E-21    | HLA-DQB1   | 1       | CD8B_CD8 Tem |
| 18 | 1.68E-35  | 0.46846607  | 0.829 | 0.789 | 3.67E-31    | CD74       | 1       | CD8B_CD8 Tem |
| 19 | 6.82E-38  | 0.4620393   | 0.637 | 0.506 | 1.49E-33    | HLA-DRB1   | 1       | CD8B_CD8 Tem |
| 20 | 7.79E-45  | 0.46026188  | 0.749 | 0.671 | 1.70E-40    | SRSF7      | 1       | CD8B_CD8 Tem |
| 21 | 3.97E-36  | 0.43574007  | 0.554 | 0.419 | 8.66E-32    | HLA-DPB1   | 1       | CD8B_CD8 Tem |
| 22 | 1.41E-31  | 0.43571543  | 0.533 | 0.42  | 3.07E-27    | HLA-DPA1   | 1       | CD8B_CD8 Tem |
| 23 | 1.30E-26  | 0.43394198  | 0.729 | 0.661 | 2.84E-22    | DNAJB1     | 1       | CD8B_CD8 Tem |
| 24 | 3.78E-204 | 0.42408226  | 0.995 | 0.997 | 8.24E-200   | RPS27      | 1       | CD8B_CD8 Tem |
| 25 | 4.52E-39  | 0.41638751  | 0.505 | 0.335 | 9.85E-35    | CD3G       | 1       | CD8B_CD8 Tem |
| 26 | 8.66E-15  | 0.40765658  | 0.734 | 0.654 | 1.89E-10    | CCL4L2     | 1       | CD8B_CD8 Tem |
| 27 | 4.48E-16  | 0.4031708   | 0.344 | 0.258 | 9.76E-12    | TSPYL2     | 1       | CD8B_CD8 Tem |
| 28 | 4.41E-16  | 0.40156333  | 0.256 | 0.172 | 9.61E-12    | TUBB2A     | 1       | CD8B_CD8 Tem |
| 29 | 1.97E-18  | 0.40103159  | 0.385 | 0.299 | 4.30E-14    | LINC00152  | 1       | CD8B_CD8 Tem |
| 30 | 3.17E-22  | 0.39472684  | 0.279 | 0.174 | 6.92E-18    | INPP4B     | 1       | CD8B_CD8 Tem |
| 31 | 1.39E-90  | 0.39190532  | 0.969 | 0.96  | 3.04E-86    | RPS29      | 1       | CD8B_CD8 Tem |
| 32 | 6.67E-22  | 0.39065275  | 0.266 | 0.161 | 1.46E-17    | THEMIS     | 1       | CD8B_CD8 Tem |
| 33 | 1.43E-19  | 0.38825332  | 0.33  | 0.214 | 3.11E-15    | XCL1       | 1       | CD8B_CD8 Tem |
| 34 | 8.86E-18  | 0.37629238  | 0.443 | 0.376 | 1.93E-13    | SH2D1A     | 1       | CD8B_CD8 Tem |
| 35 | 2.91E-13  | 0.37200931  | 0.433 | 0.379 | 6.34E-09    | KIAA1551   | 1       | CD8B_CD8 Tem |
| 36 | 5.68E-174 | 0.35967774  | 0.998 | 0.998 | 1.24E-169   | AC090498.1 | 1       | CD8B_CD8 Tem |
| 37 | 9.96E-11  | 0.34725909  | 0.166 | 0.107 | 2.17E-06    | ID3        | 1       | CD8B_CD8 Tem |
| 38 | 5.24E-24  | 0.33307052  | 0.692 | 0.632 | 1.14E-19    | CD2        | 1       | CD8B_CD8 Tem |
| 39 | 1.79E-15  | 0.33047513  | 0.341 | 0.249 | 3.91E-11    | HLA-DRB5   | 1       | CD8B_CD8 Tem |
| 40 | 3.98E-09  | 0.31990409  | 0.179 | 0.126 | 8.69E-05    | CD5        | 1       | CD8B_CD8 Tem |
| 41 | 1.15E-50  | 0.315998    | 0.921 | 0.829 | 2.52E-46    | CD3E       | 1       | CD8B_CD8 Tem |
| 42 | 3.96E-07  | 0.31314208  | 0.156 | 0.107 | 0.008638803 | TRGV2      | 1       | CD8B_CD8 Tem |
| 43 | 5.01E-11  | 0.31068727  | 0.219 | 0.153 | 1.09E-06    | SIT1       | 1       | CD8B_CD8 Tem |
| 44 | 5.44E-12  | 0.31039635  | 0.523 | 0.48  | 1.19E-07    | PIK3R1     | 1       | CD8B_CD8 Tem |
| 45 | 9.88E-13  | 0.30337384  | 0.119 | 0.062 | 2.16E-08    | TNFRSF9    | 1       | CD8B_CD8 Tem |
| 46 | 2.68E-09  | 0.3014498   | 0.151 | 0.099 | 5.85E-05    | ICMTM7     | 1       | CD8B_CD8 Tem |
| 47 | 2.17E-09  | 0.30141156  | 0.136 | 0.085 | 4.73E-05    | ICOS       | 1       | CD8B_CD8 Tem |
| 48 | 9.41E-10  | 0.30100608  | 0.196 | 0.136 | 2.05E-05    | ODC1       | 1       | CD8B_CD8 Tem |
| 49 | 2.61E-08  | 0.29715128  | 0.486 | 0.479 | 0.00056976  | SOD1       | 1       | CD8B_CD8 Tem |
| 50 | 1.88E-18  | 0.29549705  | 0.127 | 0.057 | 4.10E-14    | SELM       | 1       | CD8B_CD8 Tem |
| 51 | 1.81E-12  | 0.29323736  | 0.576 | 0.563 | 3.95E-08    | FYB        | 1       | CD8B_CD8 Tem |
| 52 | 4.39E-10  | 0.29315348  | 0.313 | 0.25  | 9.58E-06    | LYST       | 1       | CD8B_CD8 Tem |
| 53 | 5.06E-82  | 0.29000207  | 0.99  | 0.985 | 1.10E-77    | RPS25      | 1       | CD8B_CD8 Tem |
| 54 | 4.06E-31  | 0.28115149  | 0.97  | 0.961 | 8.86E-27    | JUNB       | 1       | CD8B_CD8 Tem |
| 55 | 1.20E-09  | 0.28057649  | 0.165 | 0.11  | 2.62E-05    | HLA-DMA    | 1       | CD8B_CD8 Tem |
| 56 | 4.02E-106 | 0.27760809  | 0.993 | 0.997 | 8.76E-102   | RPL30      | 1       | CD8B_CD8 Tem |
| 57 | 1.03E-16  | 0.27672189  | 0.107 | 0.046 | 2.26E-12    | CXCR3      | 1       | CD8B_CD8 Tem |
| 58 | 6.97E-104 | 0.27572755  | 0.992 | 0.996 | 1.52E-99    | RPS28      | 1       | CD8B_CD8 Tem |
| 59 | 1.44E-08  | 0.27510307  | 0.441 | 0.414 | 0.000313385 | RHOH       | 1       | CD8B_CD8 Tem |
| 60 | 7.08E-07  | 0.27486952  | 0.182 | 0.137 | 0.015446879 | HNRNPLL    | 1       | CD8B_CD8 Tem |
| 61 | 1.26E-80  | 0.27317167  | 0.993 | 0.988 | 2.75E-76    | RPS18      | 1       | CD8B_CD8 Tem |
| 62 | 1.30E-105 | 0.26773151  | 0.997 | 0.997 | 2.84E-101   | RPL39      | 1       | CD8B_CD8 Tem |
| 63 | 2.53E-104 | 0.26628803  | 0.999 | 0.998 | 5.53E-100   | RPL28      | 1       | CD8B_CD8 Tem |
| 64 | 3.21E-11  | 0.26261705  | 0.131 | 0.075 | 7.00E-07    | PECAM1     | 1       | CD8B_CD8 Tem |
| 65 | 6.78E-18  | -0.25010519 | 0.297 | 0.457 | 1.48E-13    | NME2       | 1       | CD8B_CD8 Tem |
| 66 | 8.11E-18  | -0.25145604 | 0.493 | 0.652 | 1.77E-13    | LITAF      | 1       | CD8B_CD8 Tem |
| 67 | 7.40E-12  | -0.25294716 | 0.112 | 0.202 | 1.61E-07    | ATF3       | 1       | CD8B_CD8 Tem |
| 68 | 5.92E-14  | -0.25399291 | 0.255 | 0.384 | 1.29E-09    | C12orf75   | 1       | CD8B_CD8 Tem |

|     |          |             |       |       |             |          |   |              |
|-----|----------|-------------|-------|-------|-------------|----------|---|--------------|
| 69  | 7.05E-25 | -0.25440669 | 0.696 | 0.842 | 1.54E-20    | ARPC2    | 1 | CD8B_CD8 Tem |
| 70  | 1.38E-18 | -0.25497641 | 0.184 | 0.33  | 3.01E-14    | BANF1    | 1 | CD8B_CD8 Tem |
| 71  | 1.30E-31 | -0.25617367 | 0.991 | 0.999 | 2.84E-27    | ACTB     | 1 | CD8B_CD8 Tem |
| 72  | 2.83E-14 | -0.25664238 | 0.208 | 0.333 | 6.17E-10    | H2AFV    | 1 | CD8B_CD8 Tem |
| 73  | 6.25E-21 | -0.25686354 | 0.244 | 0.422 | 1.36E-16    | P4HB     | 1 | CD8B_CD8 Tem |
| 74  | 1.08E-19 | -0.2593949  | 0.204 | 0.359 | 2.35E-15    | KLF2     | 1 | CD8B_CD8 Tem |
| 75  | 5.07E-28 | -0.25993759 | 0.685 | 0.848 | 1.11E-23    | RAC2     | 1 | CD8B_CD8 Tem |
| 76  | 4.06E-16 | -0.26233176 | 0.491 | 0.646 | 8.84E-12    | SQSTM1   | 1 | CD8B_CD8 Tem |
| 77  | 7.42E-23 | -0.26256045 | 0.227 | 0.409 | 1.62E-18    | SCP2     | 1 | CD8B_CD8 Tem |
| 78  | 4.03E-27 | -0.26266945 | 0.682 | 0.832 | 8.78E-23    | CLIC1    | 1 | CD8B_CD8 Tem |
| 79  | 1.25E-52 | -0.26303741 | 0.982 | 0.996 | 2.72E-48    | TMSB10   | 1 | CD8B_CD8 Tem |
| 80  | 2.71E-18 | -0.27176077 | 0.182 | 0.321 | 5.90E-14    | TPST2    | 1 | CD8B_CD8 Tem |
| 81  | 3.72E-39 | -0.2726667  | 0.956 | 0.985 | 8.11E-35    | PFN1     | 1 | CD8B_CD8 Tem |
| 82  | 6.56E-24 | -0.2728041  | 0.209 | 0.385 | 1.43E-19    | FKBP11   | 1 | CD8B_CD8 Tem |
| 83  | 5.06E-18 | -0.27359072 | 0.103 | 0.22  | 1.10E-13    | YES1     | 1 | CD8B_CD8 Tem |
| 84  | 1.22E-17 | -0.28277313 | 0.151 | 0.281 | 2.67E-13    | STARD3NL | 1 | CD8B_CD8 Tem |
| 85  | 4.87E-10 | -0.28374617 | 0.78  | 0.834 | 1.06E-05    | VIM      | 1 | CD8B_CD8 Tem |
| 86  | 6.47E-25 | -0.28449457 | 0.302 | 0.511 | 1.41E-20    | BIN2     | 1 | CD8B_CD8 Tem |
| 87  | 7.47E-20 | -0.28626016 | 0.118 | 0.251 | 1.63E-15    | ADRB2    | 1 | CD8B_CD8 Tem |
| 88  | 9.11E-23 | -0.28757564 | 0.534 | 0.717 | 1.99E-18    | NEAT1    | 1 | CD8B_CD8 Tem |
| 89  | 8.96E-25 | -0.28877862 | 0.299 | 0.497 | 1.95E-20    | ARL4C    | 1 | CD8B_CD8 Tem |
| 90  | 3.71E-24 | -0.28953073 | 0.28  | 0.47  | 8.08E-20    | AES      | 1 | CD8B_CD8 Tem |
| 91  | 8.54E-24 | -0.29510544 | 0.14  | 0.297 | 1.86E-19    | UPP1     | 1 | CD8B_CD8 Tem |
| 92  | 1.08E-23 | -0.29528118 | 0.255 | 0.444 | 2.35E-19    | PIM1     | 1 | CD8B_CD8 Tem |
| 93  | 3.87E-21 | -0.29676732 | 0.107 | 0.238 | 8.43E-17    | ADAM8    | 1 | CD8B_CD8 Tem |
| 94  | 3.45E-22 | -0.2987168  | 0.318 | 0.502 | 7.53E-18    | CTSD     | 1 | CD8B_CD8 Tem |
| 95  | 1.60E-21 | -0.30234759 | 0.238 | 0.399 | 3.50E-17    | SPOCK2   | 1 | CD8B_CD8 Tem |
| 96  | 3.42E-21 | -0.30257714 | 0.26  | 0.43  | 7.47E-17    | PLEK     | 1 | CD8B_CD8 Tem |
| 97  | 3.05E-25 | -0.30629494 | 0.12  | 0.276 | 6.66E-21    | ICAM2    | 1 | CD8B_CD8 Tem |
| 98  | 7.50E-24 | -0.30755481 | 0.142 | 0.297 | 1.64E-19    | MAPK1    | 1 | CD8B_CD8 Tem |
| 99  | 4.71E-44 | -0.30819191 | 0.926 | 0.969 | 1.03E-39    | ACTG1    | 1 | CD8B_CD8 Tem |
| 100 | 8.18E-23 | -0.31341291 | 0.256 | 0.431 | 1.78E-18    | CD63     | 1 | CD8B_CD8 Tem |
| 101 | 1.03E-23 | -0.31483526 | 0.235 | 0.411 | 2.25E-19    | SYNE2    | 1 | CD8B_CD8 Tem |
| 102 | 5.07E-29 | -0.31757063 | 0.28  | 0.489 | 1.11E-24    | YWHAQ    | 1 | CD8B_CD8 Tem |
| 103 | 3.15E-23 | -0.32103688 | 0.535 | 0.695 | 6.86E-19    | CRIP1    | 1 | CD8B_CD8 Tem |
| 104 | 3.43E-46 | -0.32166543 | 0.888 | 0.963 | 7.48E-42    | IFITM1   | 1 | CD8B_CD8 Tem |
| 105 | 3.79E-22 | -0.32760947 | 0.273 | 0.443 | 8.26E-18    | MAP3K8   | 1 | CD8B_CD8 Tem |
| 106 | 9.77E-28 | -0.3330107  | 0.187 | 0.372 | 2.13E-23    | ADD3     | 1 | CD8B_CD8 Tem |
| 107 | 3.19E-18 | -0.33392335 | 0.251 | 0.396 | 6.96E-14    | ZEB2     | 1 | CD8B_CD8 Tem |
| 108 | 4.97E-33 | -0.33408875 | 0.235 | 0.456 | 1.08E-28    | PTPN6    | 1 | CD8B_CD8 Tem |
| 109 | 8.26E-30 | -0.3381806  | 0.442 | 0.647 | 1.80E-25    | EMP3     | 1 | CD8B_CD8 Tem |
| 110 | 6.07E-37 | -0.33843691 | 0.297 | 0.547 | 1.32E-32    | OSTF1    | 1 | CD8B_CD8 Tem |
| 111 | 4.00E-30 | -0.3402942  | 0.232 | 0.435 | 8.72E-26    | RORA     | 1 | CD8B_CD8 Tem |
| 112 | 8.98E-21 | -0.34487439 | 0.513 | 0.679 | 1.96E-16    | PPP1R15A | 1 | CD8B_CD8 Tem |
| 113 | 6.95E-29 | -0.34572271 | 0.179 | 0.365 | 1.52E-24    | TPM4     | 1 | CD8B_CD8 Tem |
| 114 | 6.89E-31 | -0.35280037 | 0.159 | 0.344 | 1.50E-26    | DSTN     | 1 | CD8B_CD8 Tem |
| 115 | 1.95E-29 | -0.35337631 | 0.141 | 0.313 | 4.26E-25    | ITGB1    | 1 | CD8B_CD8 Tem |
| 116 | 1.28E-26 | -0.35435017 | 0.218 | 0.4   | 2.79E-22    | FLNA     | 1 | CD8B_CD8 Tem |
| 117 | 1.53E-18 | -0.35456075 | 0.77  | 0.847 | 3.34E-14    | FOS      | 1 | CD8B_CD8 Tem |
| 118 | 1.23E-38 | -0.35811406 | 0.474 | 0.715 | 2.69E-34    | RAP1B    | 1 | CD8B_CD8 Tem |
| 119 | 3.17E-29 | -0.35918182 | 0.232 | 0.429 | 6.92E-25    | SERPINB1 | 1 | CD8B_CD8 Tem |
| 120 | 4.06E-34 | -0.36066695 | 0.255 | 0.479 | 8.85E-30    | PRMT2    | 1 | CD8B_CD8 Tem |
| 121 | 1.15E-33 | -0.36375418 | 0.442 | 0.669 | 2.51E-29    | GNG2     | 1 | CD8B_CD8 Tem |
| 122 | 8.59E-34 | -0.36411033 | 0.179 | 0.384 | 1.87E-29    | MGAT4A   | 1 | CD8B_CD8 Tem |
| 123 | 2.08E-06 | -0.36677537 | 0.473 | 0.571 | 0.045357322 | HMGN2    | 1 | CD8B_CD8 Tem |
| 124 | 1.35E-37 | -0.37086138 | 0.31  | 0.551 | 2.94E-33    | S100A11  | 1 | CD8B_CD8 Tem |
| 125 | 2.13E-24 | -0.37120619 | 0.286 | 0.459 | 4.64E-20    | TNF      | 1 | CD8B_CD8 Tem |
| 126 | 7.99E-40 | -0.37524832 | 0.146 | 0.364 | 1.74E-35    | PTGER2   | 1 | CD8B_CD8 Tem |
| 127 | 2.74E-34 | -0.3851069  | 0.12  | 0.305 | 5.97E-30    | GLRX     | 1 | CD8B_CD8 Tem |
| 128 | 2.00E-34 | -0.38535851 | 0.149 | 0.345 | 4.36E-30    | GLUL     | 1 | CD8B_CD8 Tem |
| 129 | 8.99E-22 | -0.38597576 | 0.421 | 0.57  | 1.96E-17    | GSTP1    | 1 | CD8B_CD8 Tem |
| 130 | 2.66E-28 | -0.38797603 | 0.112 | 0.269 | 5.80E-24    | GNPTAB   | 1 | CD8B_CD8 Tem |
| 131 | 4.04E-22 | -0.38840005 | 0.485 | 0.622 | 8.81E-18    | CD52     | 1 | CD8B_CD8 Tem |
| 132 | 1.08E-47 | -0.39395837 | 0.434 | 0.709 | 2.35E-43    | ANXA1    | 1 | CD8B_CD8 Tem |
| 133 | 2.63E-41 | -0.40523546 | 0.214 | 0.449 | 5.73E-37    | CAST     | 1 | CD8B_CD8 Tem |
| 134 | 2.17E-35 | -0.41046709 | 0.19  | 0.402 | 4.73E-31    | CD55     | 1 | CD8B_CD8 Tem |
| 135 | 1.46E-39 | -0.41579072 | 0.259 | 0.497 | 3.18E-35    | XBP1     | 1 | CD8B_CD8 Tem |
| 136 | 8.90E-37 | -0.41665652 | 0.136 | 0.338 | 1.94E-32    | SPN      | 1 | CD8B_CD8 Tem |
| 137 | 3.52E-31 | -0.42959019 | 0.361 | 0.551 | 7.69E-27    | TRBC1    | 1 | CD8B_CD8 Tem |
| 138 | 2.14E-24 | -0.43297022 | 0.183 | 0.343 | 4.66E-20    | IER3     | 1 | CD8B_CD8 Tem |

|     |           |             |       |       |           |          |   |              |
|-----|-----------|-------------|-------|-------|-----------|----------|---|--------------|
| 139 | 1.92E-23  | -0.43842044 | 0.161 | 0.309 | 4.18E-19  | KLRC3    | 1 | CD8B_CD8 Tem |
| 140 | 2.97E-37  | -0.4478691  | 0.39  | 0.615 | 6.47E-33  | TNFAIP3  | 1 | CD8B_CD8 Tem |
| 141 | 4.50E-53  | -0.457939   | 0.555 | 0.792 | 9.82E-49  | CD7      | 1 | CD8B_CD8 Tem |
| 142 | 1.00E-50  | -0.48696337 | 0.185 | 0.441 | 2.19E-46  | HMG3     | 1 | CD8B_CD8 Tem |
| 143 | 6.18E-61  | -0.48744384 | 0.665 | 0.827 | 1.35E-56  | S100A6   | 1 | CD8B_CD8 Tem |
| 144 | 7.00E-48  | -0.49928714 | 0.141 | 0.373 | 1.53E-43  | SELPLG   | 1 | CD8B_CD8 Tem |
| 145 | 1.14E-33  | -0.50614833 | 0.268 | 0.469 | 2.49E-29  | NFKBIZ   | 1 | CD8B_CD8 Tem |
| 146 | 3.92E-21  | -0.53400839 | 0.184 | 0.321 | 8.55E-17  | LTB      | 1 | CD8B_CD8 Tem |
| 147 | 1.64E-53  | -0.54912775 | 0.179 | 0.431 | 3.58E-49  | UCP2     | 1 | CD8B_CD8 Tem |
| 148 | 4.99E-14  | -0.55881565 | 0.307 | 0.42  | 1.09E-09  | AREG     | 1 | CD8B_CD8 Tem |
| 149 | 6.83E-15  | -0.56602927 | 0.367 | 0.506 | 1.49E-10  | TUBB     | 1 | CD8B_CD8 Tem |
| 150 | 7.76E-61  | -0.59413708 | 0.127 | 0.391 | 1.69E-56  | BHLHE40  | 1 | CD8B_CD8 Tem |
| 151 | 1.76E-57  | -0.62628795 | 0.888 | 0.876 | 3.85E-53  | NKG7     | 1 | CD8B_CD8 Tem |
| 152 | 4.76E-67  | -0.66516142 | 0.469 | 0.72  | 1.04E-62  | CTSW     | 1 | CD8B_CD8 Tem |
| 153 | 1.42E-76  | -0.66653378 | 0.294 | 0.606 | 3.09E-72  | GPR65    | 1 | CD8B_CD8 Tem |
| 154 | 2.49E-35  | -0.66915314 | 0.273 | 0.447 | 5.42E-31  | IL7R     | 1 | CD8B_CD8 Tem |
| 155 | 4.04E-132 | -0.69940204 | 0.711 | 0.933 | 8.81E-128 | IFITM2   | 1 | CD8B_CD8 Tem |
| 156 | 1.59E-137 | -0.71562725 | 0.714 | 0.907 | 3.47E-133 | S100A4   | 1 | CD8B_CD8 Tem |
| 157 | 6.10E-85  | -0.71748879 | 0.261 | 0.586 | 1.33E-80  | HOPX     | 1 | CD8B_CD8 Tem |
| 158 | 1.11E-80  | -0.75814668 | 0.636 | 0.825 | 2.41E-76  | NFKBIA   | 1 | CD8B_CD8 Tem |
| 159 | 6.78E-44  | -0.78203616 | 0.2   | 0.411 | 1.48E-39  | LGALS1   | 1 | CD8B_CD8 Tem |
| 160 | 8.66E-108 | -0.84572786 | 0.334 | 0.677 | 1.89E-103 | CD247    | 1 | CD8B_CD8 Tem |
| 161 | 6.83E-96  | -0.88594973 | 0.329 | 0.638 | 1.49E-91  | KLRD1    | 1 | CD8B_CD8 Tem |
| 162 | 3.45E-69  | -0.92117489 | 0.198 | 0.469 | 7.51E-65  | SPON2    | 1 | CD8B_CD8 Tem |
| 163 | 6.06E-142 | -1.01055959 | 0.414 | 0.779 | 1.32E-137 | PRF1     | 1 | CD8B_CD8 Tem |
| 164 | 1.40E-112 | -1.30936804 | 0.165 | 0.513 | 3.05E-108 | GZMB     | 1 | CD8B_CD8 Tem |
| 165 | 1.32E-192 | -1.45309419 | 0.222 | 0.711 | 2.87E-188 | KLRB1    | 1 | CD8B_CD8 Tem |
| 166 | 0         | 2.06667156  | 0.988 | 0.231 | 0         | GNLY     | 2 | GNLY_NK      |
| 167 | 0         | 1.57464118  | 0.912 | 0.187 | 0         | FGFBP2   | 2 | GNLY_NK      |
| 168 | 0         | 1.41406633  | 0.879 | 0.208 | 0         | FCGR3A   | 2 | GNLY_NK      |
| 169 | 0         | 1.23136858  | 0.959 | 0.312 | 0         | GZMB     | 2 | GNLY_NK      |
| 170 | 0         | 1.20196503  | 0.963 | 0.345 | 0         | TYROBP   | 2 | GNLY_NK      |
| 171 | 1.64E-291 | 1.10325067  | 0.65  | 0.152 | 3.58E-287 | ADGRG1   | 2 | GNLY_NK      |
| 172 | 3.88E-273 | 1.07940635  | 0.536 | 0.094 | 8.47E-269 | KIR3DL1  | 2 | GNLY_NK      |
| 173 | 1.36E-290 | 1.06106999  | 0.91  | 0.429 | 2.97E-286 | GZMH     | 2 | GNLY_NK      |
| 174 | 2.31E-289 | 0.98414041  | 0.835 | 0.264 | 5.03E-285 | KLRF1    | 2 | GNLY_NK      |
| 175 | 1.97E-233 | 0.97446592  | 0.47  | 0.082 | 4.29E-229 | IGFBP7   | 2 | GNLY_NK      |
| 176 | 1.13E-161 | 0.97419879  | 0.667 | 0.293 | 2.47E-157 | LGALS1   | 2 | GNLY_NK      |
| 177 | 8.36E-197 | 0.96937785  | 0.621 | 0.193 | 1.82E-192 | KLRC3    | 2 | GNLY_NK      |
| 178 | 3.29E-282 | 0.96443013  | 0.965 | 0.638 | 7.17E-278 | PRF1     | 2 | GNLY_NK      |
| 179 | 0         | 0.96356373  | 1     | 0.848 | 0         | NKG7     | 2 | GNLY_NK      |
| 180 | 9.27E-198 | 0.95678398  | 0.749 | 0.329 | 2.02E-193 | SPON2    | 2 | GNLY_NK      |
| 181 | 6.52E-244 | 0.91015323  | 0.936 | 0.601 | 1.42E-239 | CTSW     | 2 | GNLY_NK      |
| 182 | 2.60E-212 | 0.90376197  | 0.848 | 0.428 | 5.67E-208 | TRBC1    | 2 | GNLY_NK      |
| 183 | 1.13E-248 | 0.88713392  | 0.952 | 0.48  | 2.47E-244 | KLRD1    | 2 | GNLY_NK      |
| 184 | 3.13E-167 | 0.85402535  | 0.476 | 0.125 | 6.82E-163 | SH2D1B   | 2 | GNLY_NK      |
| 185 | 2.05E-182 | 0.8486114   | 0.398 | 0.076 | 4.47E-178 | PRSS23   | 2 | GNLY_NK      |
| 186 | 2.02E-170 | 0.8466858   | 0.69  | 0.285 | 4.41E-166 | ZEB2     | 2 | GNLY_NK      |
| 187 | 3.07E-173 | 0.83625433  | 0.398 | 0.08  | 6.69E-169 | CX3CR1   | 2 | GNLY_NK      |
| 188 | 9.13E-212 | 0.82778305  | 0.878 | 0.538 | 1.99E-207 | CD247    | 2 | GNLY_NK      |
| 189 | 4.63E-156 | 0.81336666  | 0.778 | 0.454 | 1.01E-151 | HOPX     | 2 | GNLY_NK      |
| 190 | 3.33E-134 | 0.78683633  | 0.427 | 0.129 | 7.26E-130 | TTC38    | 2 | GNLY_NK      |
| 191 | 3.99E-133 | 0.77437487  | 0.308 | 0.06  | 8.70E-129 | KIR2DL1  | 2 | GNLY_NK      |
| 192 | 1.21E-129 | 0.76711727  | 0.546 | 0.204 | 2.64E-125 | CLIC3    | 2 | GNLY_NK      |
| 193 | 2.56E-122 | 0.70546407  | 0.434 | 0.136 | 5.57E-118 | FCRL6    | 2 | GNLY_NK      |
| 194 | 1.94E-104 | 0.67657857  | 0.603 | 0.296 | 4.23E-100 | C12orf75 | 2 | GNLY_NK      |
| 195 | 6.54E-211 | 0.67101852  | 0.988 | 0.838 | 1.43E-206 | CST7     | 2 | GNLY_NK      |
| 196 | 3.29E-114 | 0.66642961  | 0.408 | 0.124 | 7.17E-110 | TRDC     | 2 | GNLY_NK      |
| 197 | 1.57E-198 | 0.65799822  | 0.989 | 0.861 | 3.43E-194 | IFITM2   | 2 | GNLY_NK      |
| 198 | 5.28E-81  | 0.63583823  | 0.448 | 0.201 | 1.15E-76  | S1PR5    | 2 | GNLY_NK      |
| 199 | 8.69E-91  | 0.63411463  | 0.617 | 0.34  | 1.90E-86  | PLEK     | 2 | GNLY_NK      |
| 200 | 2.86E-121 | 0.63126182  | 0.833 | 0.566 | 6.24E-117 | LITAF    | 2 | GNLY_NK      |
| 201 | 2.32E-145 | 0.60592858  | 0.918 | 0.768 | 5.07E-141 | CYBA     | 2 | GNLY_NK      |
| 202 | 1.23E-89  | 0.60123452  | 0.286 | 0.078 | 2.68E-85  | MTSS1    | 2 | GNLY_NK      |
| 203 | 3.80E-95  | 0.59767785  | 0.801 | 0.527 | 8.28E-91  | CMC1     | 2 | GNLY_NK      |
| 204 | 2.57E-82  | 0.59586573  | 0.333 | 0.114 | 5.59E-78  | LYN      | 2 | GNLY_NK      |
| 205 | 1.67E-109 | 0.59280574  | 0.84  | 0.624 | 3.64E-105 | ITGB2    | 2 | GNLY_NK      |
| 206 | 2.54E-81  | 0.58498297  | 0.353 | 0.125 | 5.53E-77  | FGR      | 2 | GNLY_NK      |
| 207 | 1.95E-76  | 0.57422672  | 0.431 | 0.193 | 4.24E-72  | EFHD2    | 2 | GNLY_NK      |
| 208 | 9.96E-67  | 0.56893438  | 0.415 | 0.192 | 2.17E-62  | GNPTAB   | 2 | GNLY_NK      |

|     |           |            |       |       |           |              |   |         |
|-----|-----------|------------|-------|-------|-----------|--------------|---|---------|
| 209 | 1.66E-66  | 0.55450055 | 0.539 | 0.31  | 3.62E-62  | PLAC8        | 2 | GNLY_NK |
| 210 | 1.08E-70  | 0.54898403 | 0.583 | 0.348 | 2.35E-66  | CD63         | 2 | GNLY_NK |
| 211 | 4.65E-63  | 0.54746814 | 0.48  | 0.263 | 1.01E-58  | DSTN         | 2 | GNLY_NK |
| 212 | 1.29E-72  | 0.53666148 | 0.221 | 0.056 | 2.82E-68  | AKR1C3       | 2 | GNLY_NK |
| 213 | 2.37E-56  | 0.53439059 | 0.526 | 0.321 | 5.17E-52  | FLNA         | 2 | GNLY_NK |
| 214 | 1.05E-83  | 0.53369561 | 0.743 | 0.489 | 2.29E-79  | GSTP1        | 2 | GNLY_NK |
| 215 | 3.27E-55  | 0.53192582 | 0.306 | 0.128 | 7.14E-51  | TGFBR3       | 2 | GNLY_NK |
| 216 | 1.80E-59  | 0.52623172 | 0.508 | 0.282 | 3.93E-55  | KLF2         | 2 | GNLY_NK |
| 217 | 8.65E-84  | 0.52211566 | 0.197 | 0.038 | 1.89E-79  | LILRB1       | 2 | GNLY_NK |
| 218 | 2.18E-78  | 0.51970052 | 0.786 | 0.559 | 4.76E-74  | EMP3         | 2 | GNLY_NK |
| 219 | 4.55E-56  | 0.51945405 | 0.352 | 0.16  | 9.93E-52  | TBX21        | 2 | GNLY_NK |
| 220 | 1.08E-61  | 0.51295035 | 0.346 | 0.14  | 2.36E-57  | TIGIT        | 2 | GNLY_NK |
| 221 | 1.94E-61  | 0.51046229 | 0.568 | 0.339 | 4.22E-57  | DOK2         | 2 | GNLY_NK |
| 222 | 3.34E-133 | 0.50673675 | 0.969 | 0.893 | 7.29E-129 | SH3BGRL3     | 2 | GNLY_NK |
| 223 | 5.76E-58  | 0.50486047 | 0.299 | 0.118 | 1.26E-53  | CD300A       | 2 | GNLY_NK |
| 224 | 7.68E-59  | 0.50098665 | 0.22  | 0.066 | 1.67E-54  | ENC1         | 2 | GNLY_NK |
| 225 | 4.33E-61  | 0.50068466 | 0.28  | 0.1   | 9.44E-57  | CEP78        | 2 | GNLY_NK |
| 226 | 5.15E-49  | 0.49679244 | 0.536 | 0.351 | 1.12E-44  | SERPINB1     | 2 | GNLY_NK |
| 227 | 7.85E-39  | 0.49371154 | 0.383 | 0.222 | 1.71E-34  | STARD3NL     | 2 | GNLY_NK |
| 228 | 1.33E-42  | 0.49147252 | 0.31  | 0.149 | 2.91E-38  | TRG-AS1      | 2 | GNLY_NK |
| 229 | 4.72E-59  | 0.4900423  | 0.298 | 0.114 | 1.03E-54  | C1orf21      | 2 | GNLY_NK |
| 230 | 2.58E-49  | 0.48641526 | 0.301 | 0.133 | 5.62E-45  | HSH2D        | 2 | GNLY_NK |
| 231 | 1.63E-74  | 0.47856338 | 0.178 | 0.035 | 3.54E-70  | ASCL2        | 2 | GNLY_NK |
| 232 | 1.87E-48  | 0.47826045 | 0.539 | 0.355 | 4.08E-44  | MBP          | 2 | GNLY_NK |
| 233 | 9.53E-60  | 0.47169912 | 0.259 | 0.089 | 2.08E-55  | LAT2         | 2 | GNLY_NK |
| 234 | 2.82E-41  | 0.46579833 | 0.655 | 0.52  | 6.15E-37  | CALR         | 2 | GNLY_NK |
| 235 | 6.79E-65  | 0.46544791 | 0.152 | 0.028 | 1.48E-60  | FGL2         | 2 | GNLY_NK |
| 236 | 4.71E-73  | 0.46273877 | 0.183 | 0.038 | 1.03E-68  | PLOD1        | 2 | GNLY_NK |
| 237 | 1.66E-38  | 0.45884197 | 0.365 | 0.206 | 3.61E-34  | ABI3         | 2 | GNLY_NK |
| 238 | 4.16E-48  | 0.45843224 | 0.396 | 0.208 | 9.07E-44  | PXN          | 2 | GNLY_NK |
| 239 | 1.64E-55  | 0.45743432 | 0.627 | 0.423 | 3.57E-51  | CTSD         | 2 | GNLY_NK |
| 240 | 2.67E-73  | 0.45701684 | 0.811 | 0.628 | 5.83E-69  | RAP1B        | 2 | GNLY_NK |
| 241 | 4.33E-43  | 0.45679535 | 0.468 | 0.289 | 9.44E-39  | SELPLG       | 2 | GNLY_NK |
| 242 | 1.49E-44  | 0.45494463 | 0.294 | 0.133 | 3.26E-40  | HDDC2        | 2 | GNLY_NK |
| 243 | 1.06E-42  | 0.45090704 | 0.435 | 0.257 | 2.32E-38  | TPST2        | 2 | GNLY_NK |
| 244 | 3.17E-26  | 0.44439885 | 0.361 | 0.228 | 6.91E-22  | RHOB         | 2 | GNLY_NK |
| 245 | 1.14E-44  | 0.43932165 | 0.221 | 0.082 | 2.49E-40  | LGALS3       | 2 | GNLY_NK |
| 246 | 2.01E-50  | 0.43857018 | 0.195 | 0.059 | 4.38E-46  | ITGAM        | 2 | GNLY_NK |
| 247 | 3.02E-58  | 0.43778408 | 0.184 | 0.047 | 6.59E-54  | RP11-81H14.2 | 2 | GNLY_NK |
| 248 | 8.66E-52  | 0.43574331 | 0.21  | 0.065 | 1.89E-47  | KIR2DL3      | 2 | GNLY_NK |
| 249 | 1.24E-123 | 0.4355659  | 0.992 | 0.885 | 2.70E-119 | CCL5         | 2 | GNLY_NK |
| 250 | 1.43E-40  | 0.43441435 | 0.518 | 0.344 | 3.12E-36  | UCP2         | 2 | GNLY_NK |
| 251 | 2.02E-31  | 0.43339739 | 0.413 | 0.268 | 4.40E-27  | SPN          | 2 | GNLY_NK |
| 252 | 3.19E-41  | 0.4250629  | 0.205 | 0.075 | 6.95E-37  | HAVCR2       | 2 | GNLY_NK |
| 253 | 1.24E-127 | 0.42458566 | 0.997 | 0.975 | 2.71E-123 | PFN1         | 2 | GNLY_NK |
| 254 | 4.09E-37  | 0.42181616 | 0.335 | 0.18  | 8.93E-33  | ADAM8        | 2 | GNLY_NK |
| 255 | 7.52E-71  | 0.41880219 | 0.162 | 0.029 | 1.64E-66  | GPR141       | 2 | GNLY_NK |
| 256 | 1.95E-38  | 0.41865173 | 0.56  | 0.406 | 4.25E-34  | ZAP70        | 2 | GNLY_NK |
| 257 | 3.47E-45  | 0.41775742 | 0.244 | 0.097 | 7.56E-41  | ANXA4        | 2 | GNLY_NK |
| 258 | 4.89E-78  | 0.41406476 | 0.909 | 0.788 | 1.07E-73  | ARPC2        | 2 | GNLY_NK |
| 259 | 4.06E-40  | 0.41260194 | 0.2   | 0.074 | 8.86E-36  | SYNGR1       | 2 | GNLY_NK |
| 260 | 1.43E-34  | 0.40827157 | 0.473 | 0.32  | 3.13E-30  | PRELID1      | 2 | GNLY_NK |
| 261 | 5.09E-30  | 0.40575372 | 0.451 | 0.306 | 1.11E-25  | RHOC         | 2 | GNLY_NK |
| 262 | 5.34E-53  | 0.40412553 | 0.184 | 0.051 | 1.16E-48  | KLRC2        | 2 | GNLY_NK |
| 263 | 4.17E-56  | 0.40402919 | 0.77  | 0.614 | 9.09E-52  | LSP1         | 2 | GNLY_NK |
| 264 | 5.16E-38  | 0.39924041 | 0.456 | 0.281 | 1.13E-33  | PPP3CC       | 2 | GNLY_NK |
| 265 | 1.13E-35  | 0.39772775 | 0.238 | 0.106 | 2.46E-31  | GSAP         | 2 | GNLY_NK |
| 266 | 2.06E-31  | 0.39364922 | 0.361 | 0.211 | 4.50E-27  | TXK          | 2 | GNLY_NK |
| 267 | 5.22E-38  | 0.39169811 | 0.637 | 0.486 | 1.14E-33  | SLC9A3R1     | 2 | GNLY_NK |
| 268 | 5.77E-29  | 0.38967768 | 0.443 | 0.306 | 1.26E-24  | ADD3         | 2 | GNLY_NK |
| 269 | 1.96E-26  | 0.38891371 | 0.311 | 0.183 | 4.28E-22  | RASGRP2      | 2 | GNLY_NK |
| 270 | 2.59E-30  | 0.38422691 | 0.318 | 0.177 | 5.66E-26  | RASA3        | 2 | GNLY_NK |
| 271 | 1.73E-38  | 0.38384405 | 0.187 | 0.068 | 3.78E-34  | SLC15A4      | 2 | GNLY_NK |
| 272 | 1.53E-35  | 0.38149377 | 0.188 | 0.072 | 3.34E-31  | GK5          | 2 | GNLY_NK |
| 273 | 4.94E-32  | 0.38085721 | 0.59  | 0.441 | 1.08E-27  | LIMD2        | 2 | GNLY_NK |
| 274 | 3.68E-31  | 0.37756917 | 0.599 | 0.474 | 8.02E-27  | FAM49B       | 2 | GNLY_NK |
| 275 | 6.45E-24  | 0.37680317 | 0.294 | 0.178 | 1.41E-19  | PRKCB        | 2 | GNLY_NK |
| 276 | 2.38E-33  | 0.37474893 | 0.216 | 0.093 | 5.19E-29  | UBE2F        | 2 | GNLY_NK |
| 277 | 1.03E-30  | 0.37262879 | 0.214 | 0.095 | 2.24E-26  | LINC00944    | 2 | GNLY_NK |
| 278 | 8.77E-27  | 0.37205492 | 0.373 | 0.237 | 1.91E-22  | UPP1         | 2 | GNLY_NK |

|     |          |            |       |       |          |               |   |         |
|-----|----------|------------|-------|-------|----------|---------------|---|---------|
| 279 | 2.06E-36 | 0.37120007 | 0.578 | 0.416 | 4.50E-32 | APMAP         | 2 | GNLY_NK |
| 280 | 6.64E-24 | 0.37019248 | 0.353 | 0.227 | 1.45E-19 | SYNE1         | 2 | GNLY_NK |
| 281 | 1.71E-43 | 0.36813986 | 0.148 | 0.04  | 3.72E-39 | CTBP2         | 2 | GNLY_NK |
| 282 | 2.53E-50 | 0.36578385 | 0.145 | 0.034 | 5.51E-46 | RP11-277P12.6 | 2 | GNLY_NK |
| 283 | 1.49E-31 | 0.36465168 | 0.196 | 0.082 | 3.25E-27 | RCBTB2        | 2 | GNLY_NK |
| 284 | 9.86E-43 | 0.36416571 | 0.166 | 0.051 | 2.15E-38 | PLEKHG3       | 2 | GNLY_NK |
| 285 | 3.67E-26 | 0.36313594 | 0.445 | 0.31  | 8.01E-22 | BHLHE40       | 2 | GNLY_NK |
| 286 | 2.04E-36 | 0.36272467 | 0.167 | 0.058 | 4.44E-32 | VCL           | 2 | GNLY_NK |
| 287 | 2.52E-56 | 0.36162337 | 0.127 | 0.022 | 5.50E-52 | PALLD         | 2 | GNLY_NK |
| 288 | 4.53E-25 | 0.3611046  | 0.466 | 0.348 | 9.88E-21 | SCP2          | 2 | GNLY_NK |
| 289 | 5.78E-53 | 0.36028413 | 0.118 | 0.021 | 1.26E-48 | ITGAX         | 2 | GNLY_NK |
| 290 | 3.66E-24 | 0.36005063 | 0.291 | 0.172 | 7.98E-20 | ITGB7         | 2 | GNLY_NK |
| 291 | 6.32E-26 | 0.35686874 | 0.194 | 0.09  | 1.38E-21 | PTPN12        | 2 | GNLY_NK |
| 292 | 3.48E-23 | 0.35478661 | 0.384 | 0.267 | 7.58E-19 | NDUFB7        | 2 | GNLY_NK |
| 293 | 5.70E-30 | 0.35471175 | 0.514 | 0.373 | 1.24E-25 | CAST          | 2 | GNLY_NK |
| 294 | 1.48E-27 | 0.35412676 | 0.523 | 0.397 | 3.23E-23 | VAMP8         | 2 | GNLY_NK |
| 295 | 1.60E-44 | 0.3534247  | 0.152 | 0.041 | 3.50E-40 | RASSF4        | 2 | GNLY_NK |
| 296 | 6.49E-26 | 0.35132466 | 0.293 | 0.165 | 1.42E-21 | PTMS          | 2 | GNLY_NK |
| 297 | 1.47E-59 | 0.3505286  | 0.964 | 0.843 | 3.20E-55 | S100A4        | 2 | GNLY_NK |
| 298 | 3.43E-46 | 0.35014963 | 0.15  | 0.039 | 7.49E-42 | RAP1GAP2      | 2 | GNLY_NK |
| 299 | 1.64E-22 | 0.34973541 | 0.214 | 0.113 | 3.58E-18 | TFDP2         | 2 | GNLY_NK |
| 300 | 2.20E-20 | 0.34672072 | 0.469 | 0.358 | 4.79E-16 | TCF25         | 2 | GNLY_NK |
| 301 | 3.64E-25 | 0.34667125 | 0.388 | 0.25  | 7.93E-21 | ITGB1         | 2 | GNLY_NK |
| 302 | 1.00E-24 | 0.3461243  | 0.552 | 0.432 | 2.18E-20 | ARL4C         | 2 | GNLY_NK |
| 303 | 3.90E-50 | 0.34423585 | 0.12  | 0.023 | 8.51E-46 | CXCR2         | 2 | GNLY_NK |
| 304 | 4.15E-27 | 0.34406785 | 0.166 | 0.067 | 9.04E-23 | LAIR2         | 2 | GNLY_NK |
| 305 | 5.71E-28 | 0.34396529 | 0.336 | 0.193 | 1.25E-23 | AOAH          | 2 | GNLY_NK |
| 306 | 4.44E-69 | 0.34282791 | 0.977 | 0.928 | 9.69E-65 | CFL1          | 2 | GNLY_NK |
| 307 | 5.86E-23 | 0.34121729 | 0.271 | 0.158 | 1.28E-18 | TMBIM1        | 2 | GNLY_NK |
| 308 | 2.00E-20 | 0.34016171 | 0.302 | 0.191 | 4.36E-16 | PTGDR         | 2 | GNLY_NK |
| 309 | 3.13E-27 | 0.33969088 | 0.57  | 0.442 | 6.82E-23 | BIN2          | 2 | GNLY_NK |
| 310 | 1.63E-29 | 0.338623   | 0.225 | 0.102 | 3.56E-25 | FCRL3         | 2 | GNLY_NK |
| 311 | 2.27E-20 | 0.33755806 | 0.352 | 0.239 | 4.95E-16 | TES           | 2 | GNLY_NK |
| 312 | 1.57E-27 | 0.33702255 | 0.54  | 0.414 | 3.43E-23 | DHRS7         | 2 | GNLY_NK |
| 313 | 7.55E-25 | 0.33259564 | 0.567 | 0.457 | 1.65E-20 | NDUFB2        | 2 | GNLY_NK |
| 314 | 5.87E-18 | 0.33188916 | 0.262 | 0.165 | 1.28E-13 | G6PD          | 2 | GNLY_NK |
| 315 | 1.01E-24 | 0.33145242 | 0.526 | 0.404 | 2.21E-20 | WDR1          | 2 | GNLY_NK |
| 316 | 1.22E-77 | 0.33046546 | 0.989 | 0.937 | 2.66E-73 | IFITM1        | 2 | GNLY_NK |
| 317 | 3.30E-23 | 0.33034885 | 0.368 | 0.24  | 7.20E-19 | MAPK1         | 2 | GNLY_NK |
| 318 | 6.71E-42 | 0.32855492 | 0.793 | 0.629 | 1.46E-37 | CRIP1         | 2 | GNLY_NK |
| 319 | 1.47E-43 | 0.32758146 | 0.123 | 0.028 | 3.21E-39 | TSPAN2        | 2 | GNLY_NK |
| 320 | 2.71E-31 | 0.32748501 | 0.15  | 0.054 | 5.91E-27 | RGS9          | 2 | GNLY_NK |
| 321 | 4.27E-25 | 0.32704849 | 0.184 | 0.084 | 9.32E-21 | S1PR1         | 2 | GNLY_NK |
| 322 | 1.58E-22 | 0.32635315 | 0.432 | 0.308 | 3.44E-18 | TECR          | 2 | GNLY_NK |
| 323 | 6.92E-39 | 0.32160427 | 0.118 | 0.029 | 1.51E-34 | MIR181A2HG    | 2 | GNLY_NK |
| 324 | 6.42E-28 | 0.32103822 | 0.166 | 0.066 | 1.40E-23 | KIR3DL2       | 2 | GNLY_NK |
| 325 | 1.10E-18 | 0.31956462 | 0.28  | 0.177 | 2.39E-14 | MED15         | 2 | GNLY_NK |
| 326 | 9.06E-23 | 0.31868582 | 0.523 | 0.395 | 1.98E-18 | PYHIN1        | 2 | GNLY_NK |
| 327 | 4.71E-23 | 0.31844962 | 0.514 | 0.385 | 1.03E-18 | PTPN6         | 2 | GNLY_NK |
| 328 | 1.33E-25 | 0.31822872 | 0.638 | 0.52  | 2.90E-21 | PDIA3         | 2 | GNLY_NK |
| 329 | 2.98E-37 | 0.31739964 | 0.13  | 0.036 | 6.49E-33 | KLRC4         | 2 | GNLY_NK |
| 330 | 4.32E-16 | 0.31724033 | 0.392 | 0.296 | 9.41E-12 | RASSF1        | 2 | GNLY_NK |
| 331 | 1.50E-24 | 0.317053   | 0.172 | 0.077 | 3.27E-20 | JAZF1         | 2 | GNLY_NK |
| 332 | 1.49E-18 | 0.3151368  | 0.311 | 0.204 | 3.26E-14 | IFITM3        | 2 | GNLY_NK |
| 333 | 1.16E-18 | 0.31370289 | 0.419 | 0.316 | 2.54E-14 | PRDX5         | 2 | GNLY_NK |
| 334 | 5.60E-31 | 0.31243844 | 0.587 | 0.412 | 1.22E-26 | HLA-DPB1      | 2 | GNLY_NK |
| 335 | 3.20E-44 | 0.3121872  | 0.895 | 0.768 | 6.98E-40 | S100A6        | 2 | GNLY_NK |
| 336 | 8.55E-16 | 0.3121432  | 0.298 | 0.205 | 1.86E-11 | ADRB2         | 2 | GNLY_NK |
| 337 | 1.04E-16 | 0.31148912 | 0.376 | 0.278 | 2.26E-12 | APOBEC3G      | 2 | GNLY_NK |
| 338 | 5.44E-16 | 0.30973402 | 0.34  | 0.245 | 1.19E-11 | CAPN2         | 2 | GNLY_NK |
| 339 | 1.91E-26 | 0.30848479 | 0.599 | 0.467 | 4.16E-22 | PPP1R18       | 2 | GNLY_NK |
| 340 | 5.21E-19 | 0.30766829 | 0.401 | 0.291 | 1.14E-14 | MYO1G         | 2 | GNLY_NK |
| 341 | 1.37E-20 | 0.30715923 | 0.257 | 0.147 | 2.98E-16 | DTHD1         | 2 | GNLY_NK |
| 342 | 4.17E-44 | 0.30636133 | 0.104 | 0.019 | 9.09E-40 | AK5           | 2 | GNLY_NK |
| 343 | 1.76E-40 | 0.30519352 | 0.925 | 0.803 | 3.83E-36 | GZMA          | 2 | GNLY_NK |
| 344 | 1.25E-18 | 0.3025158  | 0.513 | 0.412 | 2.73E-14 | PRMT2         | 2 | GNLY_NK |
| 345 | 1.29E-26 | 0.30197582 | 0.167 | 0.07  | 2.80E-22 | OSBPL5        | 2 | GNLY_NK |
| 346 | 3.53E-93 | 0.29746416 | 0.997 | 0.988 | 7.69E-89 | HLA-C         | 2 | GNLY_NK |
| 347 | 5.05E-17 | 0.29728875 | 0.269 | 0.171 | 1.10E-12 | HRASLS2       | 2 | GNLY_NK |
| 348 | 1.41E-68 | 0.29726444 | 0.999 | 0.997 | 3.07E-64 | ACTB          | 2 | GNLY_NK |

|     |           |            |       |       |           |          |   |         |
|-----|-----------|------------|-------|-------|-----------|----------|---|---------|
| 349 | 4.08E-20  | 0.29700625 | 0.53  | 0.42  | 8.90E-16  | ANXA6    | 2 | GNLY_NK |
| 350 | 2.60E-24  | 0.29679909 | 0.163 | 0.07  | 5.67E-20  | NCR1     | 2 | GNLY_NK |
| 351 | 1.22E-19  | 0.29676683 | 0.172 | 0.086 | 2.66E-15  | HIPK2    | 2 | GNLY_NK |
| 352 | 1.93E-24  | 0.29557209 | 0.638 | 0.509 | 4.20E-20  | GZMM     | 2 | GNLY_NK |
| 353 | 2.34E-14  | 0.29452586 | 0.288 | 0.2   | 5.10E-10  | MIEN1    | 2 | GNLY_NK |
| 354 | 4.05E-20  | 0.29128706 | 0.482 | 0.365 | 8.83E-16  | HMG3     | 2 | GNLY_NK |
| 355 | 6.47E-23  | 0.29061283 | 0.663 | 0.558 | 1.41E-18  | CAP1     | 2 | GNLY_NK |
| 356 | 1.17E-19  | 0.29042225 | 0.59  | 0.479 | 2.55E-15  | S100A11  | 2 | GNLY_NK |
| 357 | 6.29E-15  | 0.28994359 | 0.497 | 0.407 | 1.37E-10  | MAPRE2   | 2 | GNLY_NK |
| 358 | 9.63E-18  | 0.28938419 | 0.264 | 0.161 | 2.10E-13  | ARID5B   | 2 | GNLY_NK |
| 359 | 2.50E-25  | 0.28896764 | 0.717 | 0.599 | 5.46E-21  | GNG2     | 2 | GNLY_NK |
| 360 | 5.30E-17  | 0.28877901 | 0.338 | 0.235 | 1.16E-12  | FAM65B   | 2 | GNLY_NK |
| 361 | 5.41E-35  | 0.28858107 | 0.681 | 0.496 | 1.18E-30  | HLA-DRB1 | 2 | GNLY_NK |
| 362 | 1.38E-43  | 0.2882041  | 0.105 | 0.02  | 3.01E-39  | SLCO4C1  | 2 | GNLY_NK |
| 363 | 1.01E-18  | 0.28781569 | 0.154 | 0.075 | 2.20E-14  | RRBP1    | 2 | GNLY_NK |
| 364 | 5.46E-20  | 0.28670659 | 0.591 | 0.486 | 1.19E-15  | PPP1CA   | 2 | GNLY_NK |
| 365 | 1.88E-36  | 0.2864126  | 0.105 | 0.024 | 4.11E-32  | PPM1L    | 2 | GNLY_NK |
| 366 | 8.21E-16  | 0.28639581 | 0.268 | 0.174 | 1.79E-11  | STK38    | 2 | GNLY_NK |
| 367 | 2.23E-15  | 0.28605463 | 0.263 | 0.17  | 4.87E-11  | F2R      | 2 | GNLY_NK |
| 368 | 2.44E-15  | 0.28534896 | 0.407 | 0.309 | 5.32E-11  | CARD16   | 2 | GNLY_NK |
| 369 | 1.83E-18  | 0.2851645  | 0.42  | 0.302 | 4.00E-14  | NCR3     | 2 | GNLY_NK |
| 370 | 2.85E-30  | 0.28446054 | 0.774 | 0.622 | 6.21E-26  | ANXA1    | 2 | GNLY_NK |
| 371 | 4.50E-14  | 0.28420382 | 0.286 | 0.198 | 9.82E-10  | MRPS6    | 2 | GNLY_NK |
| 372 | 1.18E-16  | 0.28332311 | 0.362 | 0.26  | 2.58E-12  | CHST12   | 2 | GNLY_NK |
| 373 | 3.50E-16  | 0.2833097  | 0.372 | 0.272 | 7.64E-12  | VASP     | 2 | GNLY_NK |
| 374 | 1.36E-21  | 0.28291432 | 0.578 | 0.465 | 2.96E-17  | DBI      | 2 | GNLY_NK |
| 375 | 1.78E-32  | 0.28287885 | 0.115 | 0.032 | 3.89E-28  | MLC1     | 2 | GNLY_NK |
| 376 | 1.44E-18  | 0.28115082 | 0.184 | 0.096 | 3.15E-14  | NPRL2    | 2 | GNLY_NK |
| 377 | 2.71E-16  | 0.28101735 | 0.407 | 0.308 | 5.91E-12  | SUN2     | 2 | GNLY_NK |
| 378 | 2.67E-14  | 0.28044886 | 0.343 | 0.252 | 5.82E-10  | C5orf56  | 2 | GNLY_NK |
| 379 | 7.74E-43  | 0.28034106 | 0.92  | 0.843 | 1.69E-38  | CD99     | 2 | GNLY_NK |
| 380 | 1.82E-18  | 0.27897788 | 0.239 | 0.138 | 3.96E-14  | MCTP2    | 2 | GNLY_NK |
| 381 | 1.69E-13  | 0.27752247 | 0.262 | 0.178 | 3.68E-09  | LPCAT1   | 2 | GNLY_NK |
| 382 | 2.94E-26  | 0.27673017 | 0.123 | 0.043 | 6.40E-22  | NMUR1    | 2 | GNLY_NK |
| 383 | 1.08E-15  | 0.27614039 | 0.421 | 0.323 | 2.36E-11  | PSMB10   | 2 | GNLY_NK |
| 384 | 5.27E-18  | 0.27581571 | 0.661 | 0.569 | 1.15E-13  | CTSC     | 2 | GNLY_NK |
| 385 | 4.82E-93  | 0.274709   | 1     | 0.991 | 1.05E-88  | HLA-A    | 2 | GNLY_NK |
| 386 | 5.48E-16  | 0.27270118 | 0.395 | 0.298 | 1.19E-11  | NDUFA12  | 2 | GNLY_NK |
| 387 | 1.10E-42  | 0.27156381 | 0.954 | 0.912 | 2.41E-38  | SERF2    | 2 | GNLY_NK |
| 388 | 3.51E-16  | 0.2713596  | 0.271 | 0.176 | 7.65E-12  | PTPRE    | 2 | GNLY_NK |
| 389 | 4.35E-11  | 0.26983048 | 0.225 | 0.153 | 9.49E-07  | GLIPR2   | 2 | GNLY_NK |
| 390 | 1.26E-16  | 0.26915494 | 0.507 | 0.413 | 2.76E-12  | RAC1     | 2 | GNLY_NK |
| 391 | 2.36E-20  | 0.26911982 | 0.196 | 0.099 | 5.15E-16  | APBA2    | 2 | GNLY_NK |
| 392 | 1.93E-14  | 0.26895537 | 0.32  | 0.226 | 4.21E-10  | MYO1F    | 2 | GNLY_NK |
| 393 | 5.17E-23  | 0.26804093 | 0.299 | 0.168 | 1.13E-18  | HLA-DQA1 | 2 | GNLY_NK |
| 394 | 1.16E-18  | 0.26638704 | 0.137 | 0.062 | 2.53E-14  | FUT11    | 2 | GNLY_NK |
| 395 | 5.64E-79  | 0.2646572  | 1     | 0.991 | 1.23E-74  | TMSB10   | 2 | GNLY_NK |
| 396 | 7.61E-31  | 0.26430668 | 0.865 | 0.785 | 1.66E-26  | CLIC1    | 2 | GNLY_NK |
| 397 | 2.03E-24  | 0.26422656 | 0.141 | 0.055 | 4.42E-20  | BPGM     | 2 | GNLY_NK |
| 398 | 3.06E-17  | 0.26187342 | 0.157 | 0.078 | 6.68E-13  | FNDC3B   | 2 | GNLY_NK |
| 399 | 7.76E-12  | 0.25963724 | 0.253 | 0.177 | 1.69E-07  | SRPK2    | 2 | GNLY_NK |
| 400 | 4.39E-15  | 0.25826317 | 0.266 | 0.174 | 9.57E-11  | SH3BP5   | 2 | GNLY_NK |
| 401 | 6.57E-15  | 0.2575389  | 0.443 | 0.35  | 1.43E-10  | BSG      | 2 | GNLY_NK |
| 402 | 3.38E-12  | 0.25749211 | 0.281 | 0.2   | 7.37E-08  | LMO4     | 2 | GNLY_NK |
| 403 | 2.48E-17  | 0.25686349 | 0.62  | 0.535 | 5.40E-13  | ARPC1B   | 2 | GNLY_NK |
| 404 | 1.17E-36  | 0.25679236 | 0.947 | 0.908 | 2.55E-32  | CALM1    | 2 | GNLY_NK |
| 405 | 1.19E-24  | 0.25614935 | 0.797 | 0.715 | 2.59E-20  | IL2RG    | 2 | GNLY_NK |
| 406 | 4.51E-21  | 0.25597106 | 0.727 | 0.656 | 9.82E-17  | CCND3    | 2 | GNLY_NK |
| 407 | 2.05E-19  | 0.25563823 | 0.69  | 0.611 | 4.47E-15  | ARL6IP5  | 2 | GNLY_NK |
| 408 | 3.05E-144 | 0.25537475 | 1     | 1     | 6.66E-140 | B2M      | 2 | GNLY_NK |
| 409 | 1.21E-14  | 0.25460754 | 0.525 | 0.448 | 2.65E-10  | CD47     | 2 | GNLY_NK |
| 410 | 2.45E-17  | 0.25410417 | 0.181 | 0.096 | 5.34E-13  | PLCG2    | 2 | GNLY_NK |
| 411 | 5.28E-15  | 0.25402816 | 0.357 | 0.246 | 1.15E-10  | HLA-DRB5 | 2 | GNLY_NK |
| 412 | 1.69E-18  | 0.25360373 | 0.148 | 0.069 | 3.68E-14  | SYT11    | 2 | GNLY_NK |
| 413 | 3.41E-19  | 0.25355639 | 0.654 | 0.568 | 7.44E-15  | RNASEK   | 2 | GNLY_NK |
| 414 | 5.05E-12  | 0.25334094 | 0.407 | 0.326 | 1.10E-07  | PRKACB   | 2 | GNLY_NK |
| 415 | 8.92E-18  | 0.2532222  | 0.647 | 0.561 | 1.94E-13  | TPI1     | 2 | GNLY_NK |
| 416 | 1.31E-16  | 0.25205012 | 0.632 | 0.552 | 2.86E-12  | ACTR3    | 2 | GNLY_NK |
| 417 | 1.75E-15  | 0.25160837 | 0.533 | 0.448 | 3.81E-11  | CD164    | 2 | GNLY_NK |
| 418 | 5.30E-14  | 0.25150794 | 0.35  | 0.257 | 1.16E-09  | SYTL1    | 2 | GNLY_NK |

|     |           |             |       |       |             |          |   |         |
|-----|-----------|-------------|-------|-------|-------------|----------|---|---------|
| 419 | 2.85E-13  | 0.25138626  | 0.223 | 0.143 | 6.23E-09    | UCHL5    | 2 | GNLY_NK |
| 420 | 1.47E-39  | -0.25255869 | 0.939 | 0.963 | 3.20E-35    | RPL10A   | 2 | GNLY_NK |
| 421 | 5.08E-14  | -0.25258616 | 0.225 | 0.347 | 1.11E-09    | MYADM    | 2 | GNLY_NK |
| 422 | 2.34E-29  | -0.25316734 | 0.914 | 0.938 | 5.10E-25    | RPL9     | 2 | GNLY_NK |
| 423 | 3.75E-46  | -0.25685733 | 0.978 | 0.988 | 8.17E-42    | RPS25    | 2 | GNLY_NK |
| 424 | 1.06E-11  | -0.25977143 | 0.205 | 0.308 | 2.31E-07    | FAM46C   | 2 | GNLY_NK |
| 425 | 6.50E-96  | -0.26026123 | 1     | 1     | 1.42E-91    | EEF1A1   | 2 | GNLY_NK |
| 426 | 4.42E-54  | -0.26124992 | 0.986 | 0.987 | 9.63E-50    | RPL12    | 2 | GNLY_NK |
| 427 | 7.25E-23  | -0.26209883 | 0.946 | 0.967 | 1.58E-18    | JUNB     | 2 | GNLY_NK |
| 428 | 6.64E-43  | -0.26248148 | 0.945 | 0.968 | 1.45E-38    | RPSA     | 2 | GNLY_NK |
| 429 | 5.53E-17  | -0.26477853 | 0.205 | 0.342 | 1.21E-12    | PEBP1    | 2 | GNLY_NK |
| 430 | 8.65E-86  | -0.26493618 | 0.999 | 0.998 | 1.89E-81    | RPS15A   | 2 | GNLY_NK |
| 431 | 4.49E-71  | -0.26609166 | 0.995 | 0.991 | 9.79E-67    | RPL37    | 2 | GNLY_NK |
| 432 | 2.32E-15  | -0.26624769 | 0.262 | 0.395 | 5.06E-11    | NAP1L1   | 2 | GNLY_NK |
| 433 | 4.91E-17  | -0.26627464 | 0.1   | 0.21  | 1.07E-12    | ODF2L    | 2 | GNLY_NK |
| 434 | 5.87E-09  | -0.26694675 | 0.262 | 0.353 | 0.000127974 | NR4A1    | 2 | GNLY_NK |
| 435 | 1.09E-14  | -0.27067542 | 0.41  | 0.53  | 2.37E-10    | LDHB     | 2 | GNLY_NK |
| 436 | 1.64E-15  | -0.27248186 | 0.128 | 0.238 | 3.59E-11    | ERN1     | 2 | GNLY_NK |
| 437 | 5.32E-64  | -0.27278379 | 0.987 | 0.993 | 1.16E-59    | RPLP2    | 2 | GNLY_NK |
| 438 | 1.83E-32  | -0.27497985 | 0.945 | 0.966 | 3.98E-28    | RPS29    | 2 | GNLY_NK |
| 439 | 8.65E-17  | -0.27522459 | 0.31  | 0.451 | 1.89E-12    | TC2N     | 2 | GNLY_NK |
| 440 | 5.74E-12  | -0.27882901 | 0.322 | 0.436 | 1.25E-07    | EZR      | 2 | GNLY_NK |
| 441 | 6.66E-75  | -0.27896252 | 0.997 | 0.995 | 1.45E-70    | RPS28    | 2 | GNLY_NK |
| 442 | 4.26E-11  | -0.27926659 | 0.535 | 0.627 | 9.29E-07    | CITED2   | 2 | GNLY_NK |
| 443 | 1.87E-49  | -0.27984647 | 0.968 | 0.979 | 4.07E-45    | RPL36    | 2 | GNLY_NK |
| 444 | 3.53E-11  | -0.28040203 | 0.159 | 0.25  | 7.69E-07    | TUBA1C   | 2 | GNLY_NK |
| 445 | 1.32E-19  | -0.28188348 | 0.36  | 0.519 | 2.87E-15    | HMG1     | 2 | GNLY_NK |
| 446 | 1.49E-18  | -0.28742458 | 0.107 | 0.227 | 3.26E-14    | BCL11B   | 2 | GNLY_NK |
| 447 | 4.78E-60  | -0.28947686 | 0.985 | 0.987 | 1.04E-55    | RPS21    | 2 | GNLY_NK |
| 448 | 1.40E-17  | -0.29163122 | 0.105 | 0.218 | 3.06E-13    | PBXIP1   | 2 | GNLY_NK |
| 449 | 1.22E-76  | -0.29236774 | 0.998 | 0.997 | 2.65E-72    | RPL34    | 2 | GNLY_NK |
| 450 | 1.71E-18  | -0.29329074 | 0.298 | 0.45  | 3.73E-14    | RHOH     | 2 | GNLY_NK |
| 451 | 2.75E-44  | -0.29351376 | 0.919 | 0.965 | 5.99E-40    | RPS2     | 2 | GNLY_NK |
| 452 | 1.18E-28  | -0.29356551 | 0.65  | 0.772 | 2.58E-24    | EEF1G    | 2 | GNLY_NK |
| 453 | 4.95E-14  | -0.29530123 | 0.289 | 0.415 | 1.08E-09    | KIAA1551 | 2 | GNLY_NK |
| 454 | 5.22E-20  | -0.29846665 | 0.323 | 0.477 | 1.14E-15    | CNN2     | 2 | GNLY_NK |
| 455 | 1.37E-107 | -0.30133937 | 0.997 | 0.999 | 2.98E-103   | RPL28    | 2 | GNLY_NK |
| 456 | 6.03E-27  | -0.30225505 | 0.648 | 0.758 | 1.32E-22    | RPS20    | 2 | GNLY_NK |
| 457 | 9.07E-17  | -0.30238096 | 0.286 | 0.42  | 1.98E-12    | RORA     | 2 | GNLY_NK |
| 458 | 2.41E-81  | -0.30335402 | 0.991 | 0.991 | 5.27E-77    | RPL18A   | 2 | GNLY_NK |
| 459 | 6.93E-22  | -0.30413246 | 0.364 | 0.53  | 1.51E-17    | GYPC     | 2 | GNLY_NK |
| 460 | 2.65E-70  | -0.30489087 | 0.984 | 0.991 | 5.78E-66    | RPS13    | 2 | GNLY_NK |
| 461 | 2.53E-14  | -0.30561087 | 0.321 | 0.442 | 5.52E-10    | ANP32B   | 2 | GNLY_NK |
| 462 | 1.09E-20  | -0.30731593 | 0.199 | 0.349 | 2.38E-16    | ELOVL5   | 2 | GNLY_NK |
| 463 | 3.24E-36  | -0.30732305 | 0.804 | 0.883 | 7.05E-32    | EEF1B2   | 2 | GNLY_NK |
| 464 | 3.67E-89  | -0.3082126  | 1     | 0.999 | 8.01E-85    | RPLP1    | 2 | GNLY_NK |
| 465 | 1.00E-09  | -0.30931357 | 0.22  | 0.311 | 2.19E-05    | FAM177A1 | 2 | GNLY_NK |
| 466 | 4.87E-34  | -0.30952523 | 0.657 | 0.788 | 1.06E-29    | HINT1    | 2 | GNLY_NK |
| 467 | 7.93E-91  | -0.3100262  | 0.997 | 0.994 | 1.73E-86    | RPL32    | 2 | GNLY_NK |
| 468 | 3.70E-19  | -0.31090497 | 0.269 | 0.42  | 8.06E-15    | SH2D1A   | 2 | GNLY_NK |
| 469 | 1.77E-35  | -0.31310807 | 0.811 | 0.873 | 3.85E-31    | PABPC1   | 2 | GNLY_NK |
| 470 | 4.67E-22  | -0.31590742 | 0.19  | 0.346 | 1.02E-17    | TNFAIP8  | 2 | GNLY_NK |
| 471 | 1.70E-77  | -0.31840833 | 0.988 | 0.994 | 3.70E-73    | TPT1     | 2 | GNLY_NK |
| 472 | 5.43E-19  | -0.31843305 | 0.183 | 0.317 | 1.18E-14    | PIK3IP1  | 2 | GNLY_NK |
| 473 | 1.10E-11  | -0.32263486 | 0.547 | 0.605 | 2.40E-07    | CD52     | 2 | GNLY_NK |
| 474 | 2.77E-68  | -0.32285065 | 0.951 | 0.977 | 6.03E-64    | RPL8     | 2 | GNLY_NK |
| 475 | 2.94E-57  | -0.32301368 | 0.927 | 0.956 | 6.41E-53    | RPS5     | 2 | GNLY_NK |
| 476 | 1.15E-19  | -0.32641605 | 0.296 | 0.444 | 2.51E-15    | SNHG8    | 2 | GNLY_NK |
| 477 | 1.07E-08  | -0.3275887  | 0.819 | 0.824 | 0.00023441  | VIM      | 2 | GNLY_NK |
| 478 | 3.61E-20  | -0.33111136 | 0.541 | 0.67  | 7.87E-16    | PPP1R15A | 2 | GNLY_NK |
| 479 | 5.14E-15  | -0.33180934 | 0.181 | 0.299 | 1.12E-10    | TSPYL2   | 2 | GNLY_NK |
| 480 | 2.42E-93  | -0.33311073 | 0.998 | 0.997 | 5.28E-89    | RPS12    | 2 | GNLY_NK |
| 481 | 3.72E-23  | -0.33757677 | 0.146 | 0.292 | 8.11E-19    | CD6      | 2 | GNLY_NK |
| 482 | 6.56E-26  | -0.33774554 | 0.13  | 0.286 | 1.43E-21    | TMEM123  | 2 | GNLY_NK |
| 483 | 1.16E-22  | -0.34368741 | 0.564 | 0.702 | 2.52E-18    | DNAJB1   | 2 | GNLY_NK |
| 484 | 1.20E-106 | -0.34664332 | 0.997 | 0.995 | 2.62E-102   | RPS8     | 2 | GNLY_NK |
| 485 | 1.46E-110 | -0.34773955 | 0.997 | 0.997 | 3.17E-106   | RPL13    | 2 | GNLY_NK |
| 486 | 5.46E-115 | -0.34883816 | 0.997 | 0.997 | 1.19E-110   | RPL39    | 2 | GNLY_NK |
| 487 | 8.64E-27  | -0.34992287 | 0.569 | 0.716 | 1.88E-22    | SRSF7    | 2 | GNLY_NK |
| 488 | 9.53E-85  | -0.35024275 | 0.985 | 0.99  | 2.08E-80    | RPS18    | 2 | GNLY_NK |



|     |           |             |       |       |             |            |   |                |
|-----|-----------|-------------|-------|-------|-------------|------------|---|----------------|
| 489 | 4.10E-21  | -0.35027758 | 0.742 | 0.825 | 8.94E-17    | KLF6       | 2 | GNLY_NK        |
| 490 | 1.75E-18  | -0.35116641 | 0.166 | 0.296 | 3.82E-14    | AIM1       | 2 | GNLY_NK        |
| 491 | 1.27E-06  | -0.35820546 | 0.494 | 0.565 | 0.027589555 | HMG2       | 2 | GNLY_NK        |
| 492 | 1.48E-22  | -0.36608477 | 0.397 | 0.547 | 3.22E-18    | PARP8      | 2 | GNLY_NK        |
| 493 | 1.97E-25  | -0.36907308 | 0.31  | 0.485 | 4.29E-21    | CD96       | 2 | GNLY_NK        |
| 494 | 4.93E-18  | -0.37507194 | 0.368 | 0.504 | 1.07E-13    | BTG2       | 2 | GNLY_NK        |
| 495 | 1.01E-20  | -0.38077717 | 0.234 | 0.384 | 2.20E-16    | CLDND1     | 2 | GNLY_NK        |
| 496 | 1.67E-26  | -0.38264635 | 0.323 | 0.5   | 3.65E-22    | CCNH       | 2 | GNLY_NK        |
| 497 | 6.08E-29  | -0.38459678 | 0.316 | 0.504 | 1.33E-24    | LEPROTL1   | 2 | GNLY_NK        |
| 498 | 4.51E-44  | -0.38876404 | 0.82  | 0.907 | 9.83E-40    | CXCR4      | 2 | GNLY_NK        |
| 499 | 6.28E-29  | -0.39018176 | 0.111 | 0.27  | 1.37E-24    | PLP2       | 2 | GNLY_NK        |
| 500 | 4.24E-49  | -0.39559093 | 0.946 | 0.973 | 9.25E-45    | ZFP36L2    | 2 | GNLY_NK        |
| 501 | 6.66E-30  | -0.41736744 | 0.273 | 0.459 | 1.45E-25    | CD44       | 2 | GNLY_NK        |
| 502 | 2.11E-22  | -0.41846801 | 0.304 | 0.459 | 4.61E-18    | NFKBIZ     | 2 | GNLY_NK        |
| 503 | 4.41E-30  | -0.43883298 | 0.114 | 0.277 | 9.62E-26    | SATB1      | 2 | GNLY_NK        |
| 504 | 2.74E-31  | -0.43886304 | 0.658 | 0.803 | 5.98E-27    | JUN        | 2 | GNLY_NK        |
| 505 | 2.64E-19  | -0.46530557 | 0.475 | 0.592 | 5.75E-15    | TNFAIP3    | 2 | GNLY_NK        |
| 506 | 6.37E-72  | -0.46558435 | 0.75  | 0.903 | 1.39E-67    | SARAF      | 2 | GNLY_NK        |
| 507 | 3.40E-15  | -0.4666535  | 0.207 | 0.321 | 7.41E-11    | EGR1       | 2 | GNLY_NK        |
| 508 | 1.07E-30  | -0.47966421 | 0.711 | 0.804 | 2.33E-26    | NFKBIA     | 2 | GNLY_NK        |
| 509 | 5.48E-108 | -0.48724565 | 0.939 | 0.97  | 1.20E-103   | RPLP0      | 2 | GNLY_NK        |
| 510 | 9.91E-33  | -0.49947469 | 0.196 | 0.379 | 2.16E-28    | ITM2A      | 2 | GNLY_NK        |
| 511 | 1.66E-28  | -0.5180027  | 0.126 | 0.287 | 3.62E-24    | RGCC       | 2 | GNLY_NK        |
| 512 | 6.21E-59  | -0.52670824 | 0.807 | 0.907 | 1.35E-54    | DUSP1      | 2 | GNLY_NK        |
| 513 | 7.22E-14  | -0.52986717 | 0.342 | 0.444 | 1.57E-09    | TNF        | 2 | GNLY_NK        |
| 514 | 1.30E-48  | -0.53759552 | 0.245 | 0.481 | 2.83E-44    | PDCD4      | 2 | GNLY_NK        |
| 515 | 5.06E-37  | -0.53948283 | 0.377 | 0.571 | 1.10E-32    | FOSB       | 2 | GNLY_NK        |
| 516 | 1.82E-47  | -0.56084903 | 0.172 | 0.396 | 3.96E-43    | EML4       | 2 | GNLY_NK        |
| 517 | 1.63E-19  | -0.57027809 | 0.266 | 0.4   | 3.55E-15    | CCL3L3     | 2 | GNLY_NK        |
| 518 | 3.83E-50  | -0.58385799 | 0.135 | 0.364 | 8.35E-46    | IFNGR1     | 2 | GNLY_NK        |
| 519 | 1.94E-08  | -0.60376026 | 0.309 | 0.391 | 0.000422268 | HIST1H4C   | 2 | GNLY_NK        |
| 520 | 1.13E-11  | -0.63416691 | 0.268 | 0.359 | 2.47E-07    | HMGB2      | 2 | GNLY_NK        |
| 521 | 1.26E-69  | -0.64792681 | 0.135 | 0.423 | 2.75E-65    | SPOCK2     | 2 | GNLY_NK        |
| 522 | 1.04E-45  | -0.6566307  | 0.75  | 0.852 | 2.27E-41    | FOS        | 2 | GNLY_NK        |
| 523 | 1.05E-129 | -0.83907109 | 0.78  | 0.931 | 2.29E-125   | CD69       | 2 | GNLY_NK        |
| 524 | 1.38E-33  | -0.87507302 | 0.6   | 0.612 | 3.01E-29    | KLRB1      | 2 | GNLY_NK        |
| 525 | 5.21E-16  | -0.9302289  | 0.236 | 0.351 | 1.14E-11    | STMN1      | 2 | GNLY_NK        |
| 526 | 1.41E-77  | -1.11655427 | 0.135 | 0.417 | 3.07E-73    | RGS1       | 2 | GNLY_NK        |
| 527 | 5.07E-218 | 1.83168134  | 0.305 | 0.024 | 1.10E-213   | CCL20      | 3 | CCL20_CD8 MAIT |
| 528 | 0         | 1.50005153  | 0.992 | 0.522 | 0           | KLRB1      | 3 | CCL20_CD8 MAIT |
| 529 | 0         | 1.45740673  | 0.622 | 0.027 | 0           | TRAV1-2    | 3 | CCL20_CD8 MAIT |
| 530 | 0         | 1.3246429   | 0.97  | 0.282 | 0           | IL7R       | 3 | CCL20_CD8 MAIT |
| 531 | 0         | 1.26512982  | 0.566 | 0.029 | 0           | SLC4A10    | 3 | CCL20_CD8 MAIT |
| 532 | 1.92E-266 | 1.208125    | 0.338 | 0.021 | 4.18E-262   | TRBV6-1    | 3 | CCL20_CD8 MAIT |
| 533 | 2.77E-287 | 1.15307436  | 0.729 | 0.193 | 6.04E-283   | LTB        | 3 | CCL20_CD8 MAIT |
| 534 | 0         | 1.13109694  | 0.784 | 0.223 | 0           | KLRG1      | 3 | CCL20_CD8 MAIT |
| 535 | 2.47E-162 | 1.01970008  | 0.753 | 0.347 | 5.38E-158   | TNF        | 3 | CCL20_CD8 MAIT |
| 536 | 3.88E-130 | 0.94437311  | 0.185 | 0.015 | 8.45E-126   | TRAV13-2   | 3 | CCL20_CD8 MAIT |
| 537 | 2.48E-199 | 0.84159038  | 0.485 | 0.104 | 5.41E-195   | AQP3       | 3 | CCL20_CD8 MAIT |
| 538 | 3.49E-157 | 0.82727006  | 0.947 | 0.749 | 7.62E-153   | NFKBIA     | 3 | CCL20_CD8 MAIT |
| 539 | 1.52E-108 | 0.78388088  | 0.146 | 0.01  | 3.31E-104   | TRBV6-4    | 3 | CCL20_CD8 MAIT |
| 540 | 7.97E-155 | 0.77502821  | 0.65  | 0.251 | 1.74E-150   | NCR3       | 3 | CCL20_CD8 MAIT |
| 541 | 2.89E-133 | 0.76906133  | 0.731 | 0.358 | 6.29E-129   | NFKBIZ     | 3 | CCL20_CD8 MAIT |
| 542 | 9.25E-95  | 0.74857744  | 0.361 | 0.109 | 2.02E-90    | KLRC1      | 3 | CCL20_CD8 MAIT |
| 543 | 1.16E-206 | 0.74635434  | 0.35  | 0.042 | 2.54E-202   | CCR6       | 3 | CCL20_CD8 MAIT |
| 544 | 1.47E-134 | 0.73175513  | 0.531 | 0.179 | 3.21E-130   | SATB1      | 3 | CCL20_CD8 MAIT |
| 545 | 1.48E-67  | 0.72874491  | 0.596 | 0.322 | 3.23E-63    | CCL3L3     | 3 | CCL20_CD8 MAIT |
| 546 | 4.12E-172 | 0.720089    | 0.385 | 0.069 | 8.99E-168   | CD40LG     | 3 | CCL20_CD8 MAIT |
| 547 | 1.58E-155 | 0.71714267  | 0.989 | 0.881 | 3.45E-151   | CD69       | 3 | CCL20_CD8 MAIT |
| 548 | 9.00E-44  | 0.71445463  | 0.454 | 0.263 | 1.96E-39    | EGR1       | 3 | CCL20_CD8 MAIT |
| 549 | 2.34E-156 | 0.7133067   | 0.426 | 0.096 | 5.10E-152   | CXCR6      | 3 | CCL20_CD8 MAIT |
| 550 | 1.15E-170 | 0.6978323   | 0.323 | 0.047 | 2.51E-166   | COLQ       | 3 | CCL20_CD8 MAIT |
| 551 | 1.30E-176 | 0.69522544  | 0.32  | 0.043 | 2.83E-172   | DPP4       | 3 | CCL20_CD8 MAIT |
| 552 | 3.04E-66  | 0.69228404  | 0.915 | 0.812 | 6.64E-62    | FOS        | 3 | CCL20_CD8 MAIT |
| 553 | 4.50E-113 | 0.67758966  | 0.51  | 0.184 | 9.82E-109   | AC092580.4 | 3 | CCL20_CD8 MAIT |
| 554 | 5.91E-120 | 0.67551728  | 0.951 | 0.873 | 1.29E-115   | DUSP1      | 3 | CCL20_CD8 MAIT |
| 555 | 1.34E-122 | 0.66757091  | 0.671 | 0.295 | 2.92E-118   | SPOCK2     | 3 | CCL20_CD8 MAIT |
| 556 | 6.48E-141 | 0.65810406  | 0.421 | 0.104 | 1.41E-136   | TMIGD2     | 3 | CCL20_CD8 MAIT |
| 557 | 2.87E-109 | 0.65295724  | 0.6   | 0.254 | 6.26E-105   | IFNGR1     | 3 | CCL20_CD8 MAIT |
| 558 | 2.37E-206 | 0.63749176  | 0.261 | 0.015 | 5.16E-202   | RORC       | 3 | CCL20_CD8 MAIT |

|     |           |            |       |       |           |               |   |                |
|-----|-----------|------------|-------|-------|-----------|---------------|---|----------------|
| 559 | 1.18E-82  | 0.6328307  | 0.925 | 0.74  | 2.58E-78  | JUN           | 3 | CCL20_CD8 MAIT |
| 560 | 5.03E-134 | 0.61574065 | 0.324 | 0.065 | 1.10E-129 | RUNX2         | 3 | CCL20_CD8 MAIT |
| 561 | 3.57E-126 | 0.61445437 | 0.448 | 0.129 | 7.78E-122 | CAMK4         | 3 | CCL20_CD8 MAIT |
| 562 | 6.42E-67  | 0.60983527 | 0.764 | 0.524 | 1.40E-62  | TNFAIP3       | 3 | CCL20_CD8 MAIT |
| 563 | 1.35E-179 | 0.60922813 | 0.237 | 0.016 | 2.93E-175 | IL23R         | 3 | CCL20_CD8 MAIT |
| 564 | 3.37E-71  | 0.60650271 | 0.697 | 0.427 | 7.35E-67  | BTG2          | 3 | CCL20_CD8 MAIT |
| 565 | 1.95E-97  | 0.60576372 | 0.369 | 0.111 | 4.24E-93  | CEBPD         | 3 | CCL20_CD8 MAIT |
| 566 | 8.33E-77  | 0.60560123 | 0.822 | 0.603 | 1.82E-72  | PPP1R15A      | 3 | CCL20_CD8 MAIT |
| 567 | 1.08E-127 | 0.59727466 | 0.353 | 0.079 | 2.35E-123 | JAML          | 3 | CCL20_CD8 MAIT |
| 568 | 8.83E-140 | 0.5887147  | 0.346 | 0.069 | 1.93E-135 | SLAMF1        | 3 | CCL20_CD8 MAIT |
| 569 | 6.21E-111 | 0.56166956 | 0.31  | 0.07  | 1.35E-106 | IKZF2         | 3 | CCL20_CD8 MAIT |
| 570 | 4.60E-122 | 0.55570439 | 0.242 | 0.036 | 1.00E-117 | LST1          | 3 | CCL20_CD8 MAIT |
| 571 | 1.46E-68  | 0.55395528 | 0.612 | 0.343 | 3.19E-64  | RORA          | 3 | CCL20_CD8 MAIT |
| 572 | 1.35E-97  | 0.53512203 | 0.346 | 0.096 | 2.95E-93  | HPGD          | 3 | CCL20_CD8 MAIT |
| 573 | 1.88E-65  | 0.53325741 | 0.748 | 0.494 | 4.09E-61  | GPR65         | 3 | CCL20_CD8 MAIT |
| 574 | 1.21E-75  | 0.51453097 | 0.381 | 0.137 | 2.63E-71  | GPR171        | 3 | CCL20_CD8 MAIT |
| 575 | 6.90E-82  | 0.51296059 | 0.944 | 0.842 | 1.51E-77  | DUSP2         | 3 | CCL20_CD8 MAIT |
| 576 | 8.01E-94  | 0.51086207 | 0.335 | 0.093 | 1.75E-89  | ZBTB16        | 3 | CCL20_CD8 MAIT |
| 577 | 3.25E-63  | 0.50488226 | 0.2   | 0.05  | 7.10E-59  | CH17-373J23.1 | 3 | CCL20_CD8 MAIT |
| 578 | 5.74E-53  | 0.50421427 | 0.252 | 0.086 | 1.25E-48  | TRGV2         | 3 | CCL20_CD8 MAIT |
| 579 | 7.27E-143 | 0.49939094 | 0.881 | 0.367 | 1.59E-138 | GZMK          | 3 | CCL20_CD8 MAIT |
| 580 | 5.18E-65  | 0.48297898 | 0.472 | 0.22  | 1.13E-60  | GYG1          | 3 | CCL20_CD8 MAIT |
| 581 | 1.96E-65  | 0.48269612 | 0.735 | 0.467 | 4.27E-61  | PARP8         | 3 | CCL20_CD8 MAIT |
| 582 | 5.41E-45  | 0.47857606 | 0.286 | 0.118 | 1.18E-40  | CD83          | 3 | CCL20_CD8 MAIT |
| 583 | 9.46E-111 | 0.47751233 | 0.2   | 0.025 | 2.06E-106 | PLEKHA5       | 3 | CCL20_CD8 MAIT |
| 584 | 3.03E-60  | 0.46959524 | 0.401 | 0.173 | 6.60E-56  | ERN1          | 3 | CCL20_CD8 MAIT |
| 585 | 3.57E-35  | 0.46701154 | 0.494 | 0.298 | 7.79E-31  | NR4A1         | 3 | CCL20_CD8 MAIT |
| 586 | 6.43E-83  | 0.46691526 | 0.388 | 0.131 | 1.40E-78  | TRAT1         | 3 | CCL20_CD8 MAIT |
| 587 | 1.11E-63  | 0.46433137 | 0.336 | 0.124 | 2.43E-59  | BCL2          | 3 | CCL20_CD8 MAIT |
| 588 | 3.01E-79  | 0.45718349 | 0.294 | 0.083 | 6.57E-75  | SIRPG         | 3 | CCL20_CD8 MAIT |
| 589 | 8.41E-97  | 0.4566037  | 0.837 | 0.429 | 1.83E-92  | CD3D          | 3 | CCL20_CD8 MAIT |
| 590 | 1.12E-29  | 0.45563199 | 0.186 | 0.075 | 2.43E-25  | TRGV10        | 3 | CCL20_CD8 MAIT |
| 591 | 3.91E-28  | 0.44845489 | 0.397 | 0.234 | 8.54E-24  | RGS2          | 3 | CCL20_CD8 MAIT |
| 592 | 8.11E-24  | 0.44763559 | 0.332 | 0.196 | 1.77E-19  | BCL2A1        | 3 | CCL20_CD8 MAIT |
| 593 | 1.68E-60  | 0.44692938 | 0.658 | 0.383 | 3.66E-56  | PDCD4         | 3 | CCL20_CD8 MAIT |
| 594 | 3.22E-50  | 0.44661344 | 0.317 | 0.13  | 7.01E-46  | PBX4          | 3 | CCL20_CD8 MAIT |
| 595 | 7.65E-76  | 0.44172694 | 0.259 | 0.069 | 1.67E-71  | CD28          | 3 | CCL20_CD8 MAIT |
| 596 | 5.61E-48  | 0.43860741 | 0.183 | 0.053 | 1.22E-43  | MYC           | 3 | CCL20_CD8 MAIT |
| 597 | 1.22E-81  | 0.43570837 | 0.855 | 0.534 | 2.66E-77  | CD52          | 3 | CCL20_CD8 MAIT |
| 598 | 1.42E-53  | 0.43534949 | 0.328 | 0.131 | 3.10E-49  | SLC7A5        | 3 | CCL20_CD8 MAIT |
| 599 | 3.50E-39  | 0.43486976 | 0.479 | 0.271 | 7.64E-35  | IER3          | 3 | CCL20_CD8 MAIT |
| 600 | 4.76E-55  | 0.43090369 | 0.668 | 0.4   | 1.04E-50  | CD96          | 3 | CCL20_CD8 MAIT |
| 601 | 2.15E-61  | 0.43040331 | 0.349 | 0.135 | 4.69E-57  | TTC39C        | 3 | CCL20_CD8 MAIT |
| 602 | 4.94E-88  | 0.4265246  | 0.734 | 0.352 | 1.08E-83  | CD8A          | 3 | CCL20_CD8 MAIT |
| 603 | 6.71E-105 | 0.42022869 | 0.985 | 0.84  | 1.46E-100 | S100A4        | 3 | CCL20_CD8 MAIT |
| 604 | 1.57E-34  | 0.41928063 | 0.701 | 0.493 | 3.42E-30  | FOSB          | 3 | CCL20_CD8 MAIT |
| 605 | 8.90E-49  | 0.41742858 | 0.504 | 0.272 | 1.94E-44  | TNFAIP8       | 3 | CCL20_CD8 MAIT |
| 606 | 1.43E-75  | 0.41464277 | 0.179 | 0.033 | 3.11E-71  | CCR1          | 3 | CCL20_CD8 MAIT |
| 607 | 2.93E-67  | 0.41265506 | 0.259 | 0.075 | 6.40E-63  | TLE1          | 3 | CCL20_CD8 MAIT |
| 608 | 5.94E-126 | 0.40357675 | 0.165 | 0.01  | 1.30E-121 | ME1           | 3 | CCL20_CD8 MAIT |
| 609 | 1.28E-66  | 0.40178617 | 0.201 | 0.048 | 2.78E-62  | NR1D1         | 3 | CCL20_CD8 MAIT |
| 610 | 8.11E-71  | 0.39934098 | 0.212 | 0.05  | 1.77E-66  | TNFRSF25      | 3 | CCL20_CD8 MAIT |
| 611 | 5.05E-44  | 0.39759926 | 0.493 | 0.27  | 1.10E-39  | G3BP2         | 3 | CCL20_CD8 MAIT |
| 612 | 9.04E-127 | 0.39663447 | 0.136 | 0.003 | 1.97E-122 | P2RY14        | 3 | CCL20_CD8 MAIT |
| 613 | 4.02E-46  | 0.39633744 | 0.246 | 0.09  | 8.76E-42  | PFKFB3        | 3 | CCL20_CD8 MAIT |
| 614 | 1.89E-48  | 0.39359317 | 0.307 | 0.126 | 4.11E-44  | FLT3LG        | 3 | CCL20_CD8 MAIT |
| 615 | 2.22E-66  | 0.3907395  | 0.931 | 0.761 | 4.84E-62  | S100A6        | 3 | CCL20_CD8 MAIT |
| 616 | 1.31E-45  | 0.38867524 | 0.403 | 0.195 | 2.86E-41  | SYTL2         | 3 | CCL20_CD8 MAIT |
| 617 | 2.00E-54  | 0.38772306 | 0.179 | 0.045 | 4.35E-50  | SPRY1         | 3 | CCL20_CD8 MAIT |
| 618 | 3.40E-52  | 0.38591033 | 0.326 | 0.13  | 7.42E-48  | SIT1          | 3 | CCL20_CD8 MAIT |
| 619 | 3.64E-40  | 0.38367553 | 0.532 | 0.31  | 7.94E-36  | EML4          | 3 | CCL20_CD8 MAIT |
| 620 | 2.39E-45  | 0.38342715 | 0.353 | 0.159 | 5.22E-41  | PBXIP1        | 3 | CCL20_CD8 MAIT |
| 621 | 2.04E-45  | 0.38276663 | 0.342 | 0.153 | 4.44E-41  | ODF2L         | 3 | CCL20_CD8 MAIT |
| 622 | 2.58E-36  | 0.3815316  | 0.359 | 0.185 | 5.62E-32  | H1FX          | 3 | CCL20_CD8 MAIT |
| 623 | 3.68E-41  | 0.38096553 | 0.54  | 0.316 | 8.02E-37  | GBP5          | 3 | CCL20_CD8 MAIT |
| 624 | 1.30E-54  | 0.38062437 | 0.289 | 0.104 | 2.83E-50  | IL18RAP       | 3 | CCL20_CD8 MAIT |
| 625 | 1.89E-47  | 0.37915842 | 0.441 | 0.219 | 4.12E-43  | CASP1         | 3 | CCL20_CD8 MAIT |
| 626 | 1.06E-37  | 0.37325947 | 0.24  | 0.098 | 2.31E-33  | TRAF1         | 3 | CCL20_CD8 MAIT |
| 627 | 1.45E-29  | 0.3694492  | 0.246 | 0.117 | 3.15E-25  | TMEM107       | 3 | CCL20_CD8 MAIT |
| 628 | 3.26E-22  | 0.36190578 | 0.495 | 0.339 | 7.11E-18  | ZC3H12A       | 3 | CCL20_CD8 MAIT |

|     |          |            |       |       |          |              |   |                |
|-----|----------|------------|-------|-------|----------|--------------|---|----------------|
| 629 | 2.18E-34 | 0.36055883 | 0.635 | 0.425 | 4.76E-30 | CCNH         | 3 | CCL20_CD8 MAIT |
| 630 | 4.66E-80 | 0.35809864 | 0.179 | 0.03  | 1.02E-75 | CTSH         | 3 | CCL20_CD8 MAIT |
| 631 | 1.24E-40 | 0.3578639  | 0.315 | 0.14  | 2.71E-36 | SESN1        | 3 | CCL20_CD8 MAIT |
| 632 | 1.51E-41 | 0.3578046  | 0.416 | 0.214 | 3.30E-37 | RBMS1        | 3 | CCL20_CD8 MAIT |
| 633 | 2.13E-56 | 0.35742004 | 0.615 | 0.314 | 4.64E-52 | CD3G         | 3 | CCL20_CD8 MAIT |
| 634 | 2.54E-39 | 0.35635696 | 0.521 | 0.306 | 5.53E-35 | LPXN         | 3 | CCL20_CD8 MAIT |
| 635 | 2.07E-36 | 0.35498598 | 0.195 | 0.071 | 4.51E-32 | FEZ1         | 3 | CCL20_CD8 MAIT |
| 636 | 1.17E-75 | 0.35467681 | 0.988 | 0.84  | 2.55E-71 | IL32         | 3 | CCL20_CD8 MAIT |
| 637 | 5.52E-32 | 0.35209908 | 0.34  | 0.177 | 1.20E-27 | PNP          | 3 | CCL20_CD8 MAIT |
| 638 | 8.12E-42 | 0.34991475 | 0.356 | 0.164 | 1.77E-37 | CD160        | 3 | CCL20_CD8 MAIT |
| 639 | 2.01E-43 | 0.3482643  | 0.226 | 0.08  | 4.39E-39 | IL18R1       | 3 | CCL20_CD8 MAIT |
| 640 | 3.36E-53 | 0.34452038 | 0.15  | 0.033 | 7.32E-49 | CFH          | 3 | CCL20_CD8 MAIT |
| 641 | 5.06E-64 | 0.34328867 | 0.165 | 0.033 | 1.10E-59 | DUSP16       | 3 | CCL20_CD8 MAIT |
| 642 | 8.02E-38 | 0.33746859 | 0.167 | 0.054 | 1.75E-33 | SNX9         | 3 | CCL20_CD8 MAIT |
| 643 | 1.01E-37 | 0.3373719  | 0.157 | 0.048 | 2.21E-33 | PTCH2        | 3 | CCL20_CD8 MAIT |
| 644 | 1.57E-93 | 0.33603203 | 0.108 | 0.004 | 3.43E-89 | BLK          | 3 | CCL20_CD8 MAIT |
| 645 | 1.40E-73 | 0.33553375 | 0.114 | 0.011 | 3.06E-69 | ADAM12       | 3 | CCL20_CD8 MAIT |
| 646 | 5.59E-38 | 0.33528265 | 0.613 | 0.379 | 1.22E-33 | TC2N         | 3 | CCL20_CD8 MAIT |
| 647 | 9.09E-39 | 0.33191735 | 0.269 | 0.113 | 1.98E-34 | PDE7A        | 3 | CCL20_CD8 MAIT |
| 648 | 1.84E-44 | 0.32976036 | 0.24  | 0.086 | 4.01E-40 | TRGC2        | 3 | CCL20_CD8 MAIT |
| 649 | 7.38E-42 | 0.32795653 | 0.22  | 0.079 | 1.61E-37 | ABCB1        | 3 | CCL20_CD8 MAIT |
| 650 | 4.93E-29 | 0.32748562 | 0.406 | 0.235 | 1.08E-24 | GLRX         | 3 | CCL20_CD8 MAIT |
| 651 | 1.11E-43 | 0.32501955 | 0.178 | 0.054 | 2.41E-39 | PHACTR2      | 3 | CCL20_CD8 MAIT |
| 652 | 7.47E-95 | 0.3238737  | 0.119 | 0.006 | 1.63E-90 | LTK          | 3 | CCL20_CD8 MAIT |
| 653 | 1.95E-28 | 0.32311157 | 0.234 | 0.107 | 4.26E-24 | RNU12        | 3 | CCL20_CD8 MAIT |
| 654 | 3.77E-32 | 0.3228003  | 0.51  | 0.312 | 8.22E-28 | FKBP11       | 3 | CCL20_CD8 MAIT |
| 655 | 1.84E-30 | 0.31583004 | 0.663 | 0.46  | 4.01E-26 | TERF2IP      | 3 | CCL20_CD8 MAIT |
| 656 | 1.74E-39 | 0.31355017 | 0.33  | 0.149 | 3.79E-35 | THEMIS       | 3 | CCL20_CD8 MAIT |
| 657 | 2.20E-31 | 0.31332658 | 0.505 | 0.305 | 4.79E-27 | CCDC107      | 3 | CCL20_CD8 MAIT |
| 658 | 1.18E-32 | 0.31262786 | 0.352 | 0.18  | 2.57E-28 | PRNP         | 3 | CCL20_CD8 MAIT |
| 659 | 1.01E-32 | 0.31248942 | 0.369 | 0.192 | 2.20E-28 | HELZ         | 3 | CCL20_CD8 MAIT |
| 660 | 1.60E-38 | 0.31225116 | 0.184 | 0.061 | 3.50E-34 | RP11-18H21.1 | 3 | CCL20_CD8 MAIT |
| 661 | 1.41E-33 | 0.31070743 | 0.259 | 0.115 | 3.07E-29 | OXNAD1       | 3 | CCL20_CD8 MAIT |
| 662 | 4.85E-37 | 0.30900595 | 0.239 | 0.096 | 1.06E-32 | GALC         | 3 | CCL20_CD8 MAIT |
| 663 | 2.91E-18 | 0.30409111 | 0.191 | 0.099 | 6.35E-14 | NFKB1        | 3 | CCL20_CD8 MAIT |
| 664 | 4.17E-37 | 0.30376489 | 0.953 | 0.875 | 9.10E-33 | CXCR4        | 3 | CCL20_CD8 MAIT |
| 665 | 4.43E-33 | 0.30291706 | 0.217 | 0.089 | 9.65E-29 | ATF7IP2      | 3 | CCL20_CD8 MAIT |
| 666 | 2.79E-36 | 0.3027738  | 0.284 | 0.124 | 6.09E-32 | NCF1         | 3 | CCL20_CD8 MAIT |
| 667 | 3.09E-39 | 0.30183718 | 0.437 | 0.223 | 6.73E-35 | CD6          | 3 | CCL20_CD8 MAIT |
| 668 | 1.99E-28 | 0.30150558 | 0.941 | 0.911 | 4.34E-24 | IER2         | 3 | CCL20_CD8 MAIT |
| 669 | 6.52E-29 | 0.30015906 | 0.307 | 0.155 | 1.42E-24 | MAF          | 3 | CCL20_CD8 MAIT |
| 670 | 3.27E-23 | 0.2995189  | 0.715 | 0.567 | 7.14E-19 | MCL1         | 3 | CCL20_CD8 MAIT |
| 671 | 1.50E-39 | 0.29876284 | 0.279 | 0.116 | 3.28E-35 | HNRNPLL      | 3 | CCL20_CD8 MAIT |
| 672 | 7.12E-39 | 0.29830909 | 0.199 | 0.069 | 1.55E-34 | TNFSF14      | 3 | CCL20_CD8 MAIT |
| 673 | 2.91E-34 | 0.29701568 | 0.325 | 0.158 | 6.35E-30 | PDE4B        | 3 | CCL20_CD8 MAIT |
| 674 | 2.17E-19 | 0.29509764 | 0.723 | 0.583 | 4.74E-15 | CITED2       | 3 | CCL20_CD8 MAIT |
| 675 | 1.01E-81 | 0.29480622 | 0.118 | 0.009 | 2.19E-77 | TSPAN15      | 3 | CCL20_CD8 MAIT |
| 676 | 7.73E-94 | 0.29004305 | 1     | 0.999 | 1.69E-89 | MT-CO3       | 3 | CCL20_CD8 MAIT |
| 677 | 1.86E-31 | 0.28911058 | 0.301 | 0.145 | 4.06E-27 | CDK6         | 3 | CCL20_CD8 MAIT |
| 678 | 2.51E-41 | 0.28823007 | 0.13  | 0.031 | 5.48E-37 | PLXND1       | 3 | CCL20_CD8 MAIT |
| 679 | 5.93E-26 | 0.2874865  | 0.581 | 0.394 | 1.29E-21 | CKLF         | 3 | CCL20_CD8 MAIT |
| 680 | 9.50E-29 | 0.28690712 | 0.255 | 0.12  | 2.07E-24 | CTSA         | 3 | CCL20_CD8 MAIT |
| 681 | 4.63E-20 | 0.28655416 | 0.438 | 0.292 | 1.01E-15 | ELOVL5       | 3 | CCL20_CD8 MAIT |
| 682 | 3.08E-24 | 0.28450605 | 0.483 | 0.307 | 6.71E-20 | RBL2         | 3 | CCL20_CD8 MAIT |
| 683 | 8.86E-29 | 0.28431152 | 0.25  | 0.117 | 1.93E-24 | TPD52        | 3 | CCL20_CD8 MAIT |
| 684 | 5.85E-68 | 0.28389698 | 0.106 | 0.01  | 1.28E-63 | DKK3         | 3 | CCL20_CD8 MAIT |
| 685 | 3.33E-89 | 0.28237653 | 1     | 0.999 | 7.26E-85 | MT-CO1       | 3 | CCL20_CD8 MAIT |
| 686 | 2.96E-60 | 0.2816251  | 0.995 | 0.979 | 6.46E-56 | BTG1         | 3 | CCL20_CD8 MAIT |
| 687 | 1.79E-34 | 0.28138202 | 0.128 | 0.035 | 3.91E-30 | TRGV4        | 3 | CCL20_CD8 MAIT |
| 688 | 2.14E-22 | 0.27968712 | 0.473 | 0.311 | 4.67E-18 | MGAT4A       | 3 | CCL20_CD8 MAIT |
| 689 | 2.78E-30 | 0.27940817 | 0.205 | 0.085 | 6.06E-26 | SUPT3H       | 3 | CCL20_CD8 MAIT |
| 690 | 1.10E-56 | 0.27717766 | 0.111 | 0.015 | 2.41E-52 | CA2          | 3 | CCL20_CD8 MAIT |
| 691 | 1.32E-33 | 0.27453012 | 0.172 | 0.061 | 2.89E-29 | CERK         | 3 | CCL20_CD8 MAIT |
| 692 | 2.96E-22 | 0.272075   | 0.506 | 0.337 | 6.46E-18 | FNBP1        | 3 | CCL20_CD8 MAIT |
| 693 | 3.05E-17 | 0.27098301 | 0.27  | 0.157 | 6.66E-13 | PHLDA1       | 3 | CCL20_CD8 MAIT |
| 694 | 1.64E-21 | 0.26922003 | 0.242 | 0.127 | 3.58E-17 | OBFC1        | 3 | CCL20_CD8 MAIT |
| 695 | 2.75E-28 | 0.26907359 | 0.963 | 0.937 | 6.00E-24 | ZFP36        | 3 | CCL20_CD8 MAIT |
| 696 | 6.65E-29 | 0.26818274 | 0.181 | 0.072 | 1.45E-24 | PLCG1        | 3 | CCL20_CD8 MAIT |
| 697 | 2.07E-22 | 0.26569589 | 0.59  | 0.408 | 4.52E-18 | ABRACL       | 3 | CCL20_CD8 MAIT |
| 698 | 2.71E-18 | 0.26500055 | 0.441 | 0.295 | 5.92E-14 | MYADM        | 3 | CCL20_CD8 MAIT |

|     |          |             |       |       |             |             |   |                |
|-----|----------|-------------|-------|-------|-------------|-------------|---|----------------|
| 699 | 2.03E-34 | 0.26455831  | 0.941 | 0.842 | 4.42E-30    | PABPC1      | 3 | CCL20_CD8 MAIT |
| 700 | 2.50E-25 | 0.26294286  | 0.404 | 0.236 | 5.45E-21    | GPRIN3      | 3 | CCL20_CD8 MAIT |
| 701 | 2.13E-31 | 0.26111501  | 0.16  | 0.056 | 4.65E-27    | TBC1D31     | 3 | CCL20_CD8 MAIT |
| 702 | 2.04E-20 | 0.2610811   | 0.272 | 0.151 | 4.45E-16    | KDM6B       | 3 | CCL20_CD8 MAIT |
| 703 | 4.67E-41 | 0.2597288   | 0.11  | 0.023 | 1.02E-36    | NRIP1       | 3 | CCL20_CD8 MAIT |
| 704 | 1.41E-23 | 0.2597025   | 0.272 | 0.143 | 3.06E-19    | PAG1        | 3 | CCL20_CD8 MAIT |
| 705 | 5.52E-88 | 0.25909573  | 0.998 | 0.992 | 1.20E-83    | TPT1        | 3 | CCL20_CD8 MAIT |
| 706 | 3.60E-33 | 0.25747692  | 0.169 | 0.059 | 7.84E-29    | MPRIP       | 3 | CCL20_CD8 MAIT |
| 707 | 4.19E-18 | 0.25642209  | 0.386 | 0.244 | 9.14E-14    | JUND        | 3 | CCL20_CD8 MAIT |
| 708 | 3.41E-36 | 0.25563986  | 0.164 | 0.053 | 7.44E-32    | MKKNK1      | 3 | CCL20_CD8 MAIT |
| 709 | 2.80E-32 | 0.25515433  | 0.159 | 0.055 | 6.11E-28    | SPNS3       | 3 | CCL20_CD8 MAIT |
| 710 | 9.11E-54 | 0.25436806  | 0.992 | 0.958 | 1.99E-49    | RPLP0       | 3 | CCL20_CD8 MAIT |
| 711 | 3.04E-57 | 0.25408081  | 0.101 | 0.012 | 6.62E-53    | TMEM171     | 3 | CCL20_CD8 MAIT |
| 712 | 3.10E-27 | 0.25298363  | 0.324 | 0.167 | 6.76E-23    | INPP4B      | 3 | CCL20_CD8 MAIT |
| 713 | 6.03E-20 | 0.25007381  | 0.185 | 0.089 | 1.31E-15    | TIFA        | 3 | CCL20_CD8 MAIT |
| 714 | 3.84E-07 | -0.25056403 | 0.153 | 0.208 | 0.008376662 | MED15       | 3 | CCL20_CD8 MAIT |
| 715 | 8.24E-09 | -0.25179487 | 0.139 | 0.205 | 0.00017979  | STK38       | 3 | CCL20_CD8 MAIT |
| 716 | 6.43E-07 | -0.25283785 | 0.858 | 0.853 | 0.014027521 | HSP90AA1    | 3 | CCL20_CD8 MAIT |
| 717 | 1.34E-09 | -0.25770125 | 0.259 | 0.331 | 2.92E-05    | RTN4        | 3 | CCL20_CD8 MAIT |
| 718 | 2.99E-10 | -0.25812078 | 0.11  | 0.183 | 6.51E-06    | TSPAN14     | 3 | CCL20_CD8 MAIT |
| 719 | 8.39E-07 | -0.25872765 | 0.252 | 0.302 | 0.018297236 | TPST2       | 3 | CCL20_CD8 MAIT |
| 720 | 2.10E-08 | -0.26012773 | 0.143 | 0.21  | 0.000456991 | ATP1B3      | 3 | CCL20_CD8 MAIT |
| 721 | 1.21E-09 | -0.26405534 | 0.245 | 0.32  | 2.65E-05    | DSTN        | 3 | CCL20_CD8 MAIT |
| 722 | 1.01E-32 | -0.26507154 | 0.989 | 0.977 | 2.19E-28    | PFN1        | 3 | CCL20_CD8 MAIT |
| 723 | 1.11E-07 | -0.26560379 | 0.334 | 0.376 | 0.002415393 | RAD21       | 3 | CCL20_CD8 MAIT |
| 724 | 6.86E-12 | -0.26764585 | 0.521 | 0.576 | 1.50E-07    | FYB         | 3 | CCL20_CD8 MAIT |
| 725 | 6.96E-11 | -0.26807597 | 0.104 | 0.181 | 1.52E-06    | HSH2D       | 3 | CCL20_CD8 MAIT |
| 726 | 1.33E-11 | -0.26834504 | 0.516 | 0.573 | 2.90E-07    | DYNLL1      | 3 | CCL20_CD8 MAIT |
| 727 | 7.50E-08 | -0.26969625 | 0.174 | 0.237 | 0.001636152 | MTHFD2      | 3 | CCL20_CD8 MAIT |
| 728 | 1.76E-10 | -0.27001932 | 0.209 | 0.293 | 3.84E-06    | DCXR        | 3 | CCL20_CD8 MAIT |
| 729 | 1.11E-11 | -0.27118798 | 0.851 | 0.816 | 2.43E-07    | HMGB1       | 3 | CCL20_CD8 MAIT |
| 730 | 8.71E-57 | -0.27173418 | 0.998 | 0.996 | 1.90E-52    | RPS27       | 3 | CCL20_CD8 MAIT |
| 731 | 1.20E-08 | -0.27179194 | 0.209 | 0.277 | 0.000260887 | UPP1        | 3 | CCL20_CD8 MAIT |
| 732 | 3.82E-24 | -0.27298234 | 0.979 | 0.889 | 8.34E-20    | CCL5        | 3 | CCL20_CD8 MAIT |
| 733 | 8.99E-08 | -0.27374827 | 0.151 | 0.209 | 0.00196027  | TBX21       | 3 | CCL20_CD8 MAIT |
| 734 | 3.72E-11 | -0.27469983 | 0.127 | 0.207 | 8.12E-07    | SH3BP5      | 3 | CCL20_CD8 MAIT |
| 735 | 1.17E-20 | -0.27650954 | 0.724 | 0.76  | 2.55E-16    | SUB1        | 3 | CCL20_CD8 MAIT |
| 736 | 4.58E-07 | -0.27711485 | 0.204 | 0.261 | 0.00997955  | S1PR5       | 3 | CCL20_CD8 MAIT |
| 737 | 1.17E-06 | -0.2776778  | 0.293 | 0.332 | 0.025497019 | SELPLG      | 3 | CCL20_CD8 MAIT |
| 738 | 1.15E-09 | -0.27809636 | 0.131 | 0.204 | 2.51E-05    | SRRT        | 3 | CCL20_CD8 MAIT |
| 739 | 2.14E-11 | -0.28197445 | 0.184 | 0.27  | 4.66E-07    | IL10RA      | 3 | CCL20_CD8 MAIT |
| 740 | 1.12E-11 | -0.28321001 | 0.381 | 0.444 | 2.44E-07    | RAC1        | 3 | CCL20_CD8 MAIT |
| 741 | 1.50E-07 | -0.28363625 | 0.297 | 0.352 | 0.0032714   | HLA-DQB1    | 3 | CCL20_CD8 MAIT |
| 742 | 8.49E-56 | -0.28508962 | 0.994 | 0.993 | 1.85E-51    | TMSB10      | 3 | CCL20_CD8 MAIT |
| 743 | 6.58E-10 | -0.28515079 | 0.404 | 0.448 | 1.43E-05    | IFI16       | 3 | CCL20_CD8 MAIT |
| 744 | 1.24E-10 | -0.2860246  | 0.408 | 0.457 | 2.69E-06    | APMAP       | 3 | CCL20_CD8 MAIT |
| 745 | 2.65E-12 | -0.2871987  | 0.262 | 0.349 | 5.78E-08    | TECR        | 3 | CCL20_CD8 MAIT |
| 746 | 3.52E-13 | -0.28952828 | 0.521 | 0.575 | 7.68E-09    | TRBC2       | 3 | CCL20_CD8 MAIT |
| 747 | 1.04E-17 | -0.2966906  | 0.635 | 0.672 | 2.27E-13    | RAP1B       | 3 | CCL20_CD8 MAIT |
| 748 | 4.09E-10 | -0.29837376 | 0.247 | 0.316 | 8.93E-06    | HN1         | 3 | CCL20_CD8 MAIT |
| 749 | 1.63E-08 | -0.29984939 | 0.177 | 0.244 | 0.000355895 | TUBA1C      | 3 | CCL20_CD8 MAIT |
| 750 | 1.39E-07 | -0.30532333 | 0.178 | 0.237 | 0.003035753 | IFITM3      | 3 | CCL20_CD8 MAIT |
| 751 | 1.31E-07 | -0.30745772 | 0.218 | 0.274 | 0.002866571 | LYST        | 3 | CCL20_CD8 MAIT |
| 752 | 3.83E-27 | -0.30923236 | 0.798 | 0.815 | 8.36E-23    | ARPC2       | 3 | CCL20_CD8 MAIT |
| 753 | 4.70E-13 | -0.30987298 | 0.109 | 0.195 | 1.03E-08    | MIR4435-2HG | 3 | CCL20_CD8 MAIT |
| 754 | 1.53E-11 | -0.31507687 | 0.168 | 0.252 | 3.33E-07    | GNPTAB      | 3 | CCL20_CD8 MAIT |
| 755 | 5.22E-11 | -0.31587802 | 0.19  | 0.269 | 1.14E-06    | STARD3NL    | 3 | CCL20_CD8 MAIT |
| 756 | 1.22E-11 | -0.31619523 | 0.136 | 0.214 | 2.66E-07    | CDC25B      | 3 | CCL20_CD8 MAIT |
| 757 | 4.13E-14 | -0.32081491 | 0.11  | 0.2   | 9.00E-10    | CDKN2D      | 3 | CCL20_CD8 MAIT |
| 758 | 1.04E-11 | -0.32148254 | 0.331 | 0.401 | 2.27E-07    | SERPINB1    | 3 | CCL20_CD8 MAIT |
| 759 | 1.13E-14 | -0.32810704 | 0.129 | 0.227 | 2.46E-10    | RASGRP2     | 3 | CCL20_CD8 MAIT |
| 760 | 6.74E-12 | -0.3290263  | 0.739 | 0.767 | 1.47E-07    | GADD45B     | 3 | CCL20_CD8 MAIT |
| 761 | 1.86E-15 | -0.33733245 | 0.254 | 0.352 | 4.06E-11    | ADD3        | 3 | CCL20_CD8 MAIT |
| 762 | 1.76E-12 | -0.33774966 | 0.17  | 0.256 | 3.83E-08    | EFHD2       | 3 | CCL20_CD8 MAIT |
| 763 | 2.95E-14 | -0.3448467  | 0.261 | 0.356 | 6.42E-10    | ITGA4       | 3 | CCL20_CD8 MAIT |
| 764 | 2.76E-13 | -0.35396258 | 0.291 | 0.378 | 6.01E-09    | FLNA        | 3 | CCL20_CD8 MAIT |
| 765 | 1.25E-26 | -0.36012878 | 0.589 | 0.658 | 2.73E-22    | LSP1        | 3 | CCL20_CD8 MAIT |
| 766 | 2.93E-17 | -0.36093569 | 0.498 | 0.559 | 6.40E-13    | CALR        | 3 | CCL20_CD8 MAIT |
| 767 | 6.83E-23 | -0.36464682 | 0.903 | 0.86  | 1.49E-18    | CST7        | 3 | CCL20_CD8 MAIT |
| 768 | 6.44E-13 | -0.36470818 | 0.598 | 0.624 | 1.40E-08    | H2AFZ       | 3 | CCL20_CD8 MAIT |

|     |           |             |       |       |             |           |   |                |
|-----|-----------|-------------|-------|-------|-------------|-----------|---|----------------|
| 769 | 2.90E-18  | -0.36580431 | 0.391 | 0.481 | 6.31E-14    | CTSD      | 3 | CCL20_CD8 MAIT |
| 770 | 2.06E-12  | -0.36699124 | 0.341 | 0.407 | 4.48E-08    | PLEK      | 3 | CCL20_CD8 MAIT |
| 771 | 1.82E-16  | -0.36875701 | 0.469 | 0.553 | 3.98E-12    | TUBB4B    | 3 | CCL20_CD8 MAIT |
| 772 | 6.73E-17  | -0.37426616 | 0.322 | 0.412 | 1.47E-12    | CD63      | 3 | CCL20_CD8 MAIT |
| 773 | 1.94E-33  | -0.38816826 | 0.768 | 0.804 | 4.24E-29    | CYBA      | 3 | CCL20_CD8 MAIT |
| 774 | 2.07E-21  | -0.39705829 | 0.106 | 0.228 | 4.52E-17    | RASA3     | 3 | CCL20_CD8 MAIT |
| 775 | 7.83E-20  | -0.40719366 | 0.326 | 0.44  | 1.71E-15    | TMEM2     | 3 | CCL20_CD8 MAIT |
| 776 | 1.01E-27  | -0.41041107 | 0.62  | 0.678 | 2.20E-23    | ITGB2     | 3 | CCL20_CD8 MAIT |
| 777 | 7.65E-15  | -0.41085393 | 0.359 | 0.478 | 1.67E-10    | HSPA1A    | 3 | CCL20_CD8 MAIT |
| 778 | 7.94E-22  | -0.4188325  | 0.144 | 0.269 | 1.73E-17    | PXN       | 3 | CCL20_CD8 MAIT |
| 779 | 1.56E-21  | -0.42144593 | 0.64  | 0.667 | 3.40E-17    | CRIP1     | 3 | CCL20_CD8 MAIT |
| 780 | 1.56E-23  | -0.43137818 | 0.292 | 0.415 | 3.40E-19    | MBP       | 3 | CCL20_CD8 MAIT |
| 781 | 9.03E-66  | -0.44676769 | 0.943 | 0.949 | 1.97E-61    | IFITM1    | 3 | CCL20_CD8 MAIT |
| 782 | 9.58E-08  | -0.45164539 | 0.548 | 0.551 | 0.002089677 | HMG2      | 3 | CCL20_CD8 MAIT |
| 783 | 6.81E-35  | -0.45741308 | 0.51  | 0.626 | 1.48E-30    | EMP3      | 3 | CCL20_CD8 MAIT |
| 784 | 1.51E-09  | -0.47690862 | 0.395 | 0.472 | 3.29E-05    | CCL3      | 3 | CCL20_CD8 MAIT |
| 785 | 3.64E-17  | -0.47875951 | 0.174 | 0.281 | 7.94E-13    | COTL1     | 3 | CCL20_CD8 MAIT |
| 786 | 6.00E-33  | -0.48408954 | 0.185 | 0.36  | 1.31E-28    | KLF2      | 3 | CCL20_CD8 MAIT |
| 787 | 1.34E-30  | -0.49855955 | 0.333 | 0.468 | 2.93E-26    | HLA-DPA1  | 3 | CCL20_CD8 MAIT |
| 788 | 3.41E-25  | -0.49954818 | 0.113 | 0.246 | 7.44E-21    | AOAH      | 3 | CCL20_CD8 MAIT |
| 789 | 2.49E-41  | -0.50366807 | 0.502 | 0.646 | 5.43E-37    | LITAF     | 3 | CCL20_CD8 MAIT |
| 790 | 3.58E-30  | -0.50952277 | 0.191 | 0.345 | 7.80E-26    | LINC00152 | 3 | CCL20_CD8 MAIT |
| 791 | 4.43E-32  | -0.53524457 | 0.546 | 0.62  | 9.65E-28    | CD247     | 3 | CCL20_CD8 MAIT |
| 792 | 1.07E-26  | -0.53667673 | 0.232 | 0.374 | 2.34E-22    | SAMS1     | 3 | CCL20_CD8 MAIT |
| 793 | 3.41E-13  | -0.55130882 | 0.423 | 0.473 | 7.43E-09    | ARL6IP1   | 3 | CCL20_CD8 MAIT |
| 794 | 2.28E-38  | -0.55462884 | 0.244 | 0.417 | 4.97E-34    | DOK2      | 3 | CCL20_CD8 MAIT |
| 795 | 3.65E-19  | -0.56635067 | 0.747 | 0.693 | 7.96E-15    | PRF1      | 3 | CCL20_CD8 MAIT |
| 796 | 1.86E-68  | -0.57014931 | 0.889 | 0.886 | 4.05E-64    | IFITM2    | 3 | CCL20_CD8 MAIT |
| 797 | 2.33E-33  | -0.5882027  | 0.648 | 0.673 | 5.07E-29    | CTSW      | 3 | CCL20_CD8 MAIT |
| 798 | 8.97E-10  | -0.60585303 | 0.452 | 0.483 | 1.96E-05    | TUBB      | 3 | CCL20_CD8 MAIT |
| 799 | 4.57E-42  | -0.64292797 | 0.125 | 0.313 | 9.96E-38    | ITGB1     | 3 | CCL20_CD8 MAIT |
| 800 | 5.58E-41  | -0.64402138 | 0.116 | 0.303 | 1.22E-36    | HLA-DRB5  | 3 | CCL20_CD8 MAIT |
| 801 | 4.07E-52  | -0.6510967  | 0.324 | 0.555 | 8.88E-48    | TRBC1     | 3 | CCL20_CD8 MAIT |
| 802 | 3.08E-08  | -0.66780444 | 0.307 | 0.348 | 0.000672576 | HMGB2     | 3 | CCL20_CD8 MAIT |
| 803 | 4.13E-53  | -0.67011345 | 0.173 | 0.399 | 9.00E-49    | C12orf75  | 3 | CCL20_CD8 MAIT |
| 804 | 3.09E-70  | -0.7122492  | 0.722 | 0.815 | 6.73E-66    | CD74      | 3 | CCL20_CD8 MAIT |
| 805 | 3.01E-59  | -0.71580049 | 0.266 | 0.488 | 6.57E-55    | HLA-DPB1  | 3 | CCL20_CD8 MAIT |
| 806 | 2.41E-29  | -0.75970432 | 0.516 | 0.601 | 5.26E-25    | TUBA1B    | 3 | CCL20_CD8 MAIT |
| 807 | 1.21E-72  | -0.79559628 | 0.344 | 0.576 | 2.64E-68    | HLA-DRB1  | 3 | CCL20_CD8 MAIT |
| 808 | 2.90E-85  | -0.83637564 | 0.334 | 0.587 | 6.33E-81    | GSTP1     | 3 | CCL20_CD8 MAIT |
| 809 | 6.08E-50  | -0.88340563 | 0.104 | 0.311 | 1.33E-45    | CLIC3     | 3 | CCL20_CD8 MAIT |
| 810 | 1.80E-58  | -0.89541267 | 0.289 | 0.51  | 3.92E-54    | TYROBP    | 3 | CCL20_CD8 MAIT |
| 811 | 3.90E-100 | -0.91830027 | 0.954 | 0.861 | 8.50E-96    | NKG7      | 3 | CCL20_CD8 MAIT |
| 812 | 6.72E-80  | -0.92859744 | 0.133 | 0.42  | 1.46E-75    | ZEB2      | 3 | CCL20_CD8 MAIT |
| 813 | 2.12E-14  | -0.95374962 | 0.258 | 0.344 | 4.63E-10    | STMN1     | 3 | CCL20_CD8 MAIT |
| 814 | 2.92E-38  | -0.95399276 | 0.242 | 0.432 | 6.36E-34    | AREG      | 3 | CCL20_CD8 MAIT |
| 815 | 1.69E-55  | -0.96935743 | 0.179 | 0.411 | 3.68E-51    | LGALS1    | 3 | CCL20_CD8 MAIT |
| 816 | 4.40E-80  | -1.00757532 | 0.388 | 0.626 | 9.59E-76    | CMC1      | 3 | CCL20_CD8 MAIT |
| 817 | 5.20E-75  | -1.01520235 | 0.157 | 0.429 | 1.13E-70    | KLRF1     | 3 | CCL20_CD8 MAIT |
| 818 | 1.51E-71  | -1.07955456 | 0.208 | 0.46  | 3.28E-67    | SPON2     | 3 | CCL20_CD8 MAIT |
| 819 | 1.29E-143 | -1.34180563 | 0.282 | 0.641 | 2.81E-139   | KLRD1     | 3 | CCL20_CD8 MAIT |
| 820 | 1.05E-131 | -1.36231115 | 0.244 | 0.59  | 2.28E-127   | GZMH      | 3 | CCL20_CD8 MAIT |
| 821 | 1.41E-180 | 1.13547324  | 0.9   | 0.352 | 3.07E-176   | IL7R      | 4 | IL7R_CD4 T     |
| 822 | 1.18E-125 | 0.87462487  | 0.433 | 0.097 | 2.56E-121   | GPR183    | 4 | IL7R_CD4 T     |
| 823 | 1.10E-65  | 0.83389271  | 0.571 | 0.26  | 2.41E-61    | LTB       | 4 | IL7R_CD4 T     |
| 824 | 1.26E-59  | 0.83013083  | 0.502 | 0.225 | 2.74E-55    | RGCC      | 4 | IL7R_CD4 T     |
| 825 | 1.26E-168 | 0.78575369  | 0.233 | 0.013 | 2.75E-164   | LEF1      | 4 | IL7R_CD4 T     |
| 826 | 5.36E-76  | 0.74107841  | 0.355 | 0.101 | 1.17E-71    | CD40LG    | 4 | IL7R_CD4 T     |
| 827 | 7.78E-44  | 0.71533524  | 0.206 | 0.057 | 1.70E-39    | SELL      | 4 | IL7R_CD4 T     |
| 828 | 9.35E-208 | 0.63159542  | 0.236 | 0.007 | 2.04E-203   | CD4       | 4 | IL7R_CD4 T     |
| 829 | 1.14E-52  | 0.61968685  | 0.71  | 0.481 | 2.48E-48    | LDHB      | 4 | IL7R_CD4 T     |
| 830 | 5.49E-121 | 0.60383663  | 0.139 | 0.005 | 1.20E-116   | CCR7      | 4 | IL7R_CD4 T     |
| 831 | 2.31E-61  | 0.59162441  | 0.537 | 0.228 | 5.05E-57    | COTL1     | 4 | IL7R_CD4 T     |
| 832 | 5.14E-116 | 0.5741857   | 0.994 | 0.96  | 1.12E-111   | RPLP0     | 4 | IL7R_CD4 T     |
| 833 | 7.38E-50  | 0.57408723  | 0.811 | 0.567 | 1.61E-45    | CD52      | 4 | IL7R_CD4 T     |
| 834 | 1.37E-41  | 0.51158156  | 0.342 | 0.136 | 3.00E-37    | IL6ST     | 4 | IL7R_CD4 T     |
| 835 | 5.94E-39  | 0.50109447  | 0.441 | 0.214 | 1.30E-34    | PLP2      | 4 | IL7R_CD4 T     |
| 836 | 2.49E-40  | 0.49576509  | 0.463 | 0.229 | 5.42E-36    | TMEM123   | 4 | IL7R_CD4 T     |
| 837 | 2.98E-73  | 0.49576495  | 0.948 | 0.858 | 6.50E-69    | EEF1B2    | 4 | IL7R_CD4 T     |
| 838 | 2.77E-128 | 0.48979299  | 0.998 | 0.997 | 6.03E-124   | RPS12     | 4 | IL7R_CD4 T     |

|     |           |            |       |       |           |            |   |            |
|-----|-----------|------------|-------|-------|-----------|------------|---|------------|
| 839 | 1.36E-118 | 0.48530925 | 0.998 | 0.992 | 2.97E-114 | TPT1       | 4 | IL7R_CD4 T |
| 840 | 4.98E-24  | 0.48525012 | 0.217 | 0.09  | 1.09E-19  | LMNA       | 4 | IL7R_CD4 T |
| 841 | 1.74E-59  | 0.48198496 | 0.948 | 0.863 | 3.80E-55  | SARAF      | 4 | IL7R_CD4 T |
| 842 | 2.25E-159 | 0.47945248 | 0.152 | 0.002 | 4.92E-155 | MAL        | 4 | IL7R_CD4 T |
| 843 | 9.84E-84  | 0.47421404 | 0.986 | 0.927 | 2.15E-79  | RPL9       | 4 | IL7R_CD4 T |
| 844 | 3.64E-36  | 0.47292047 | 0.119 | 0.023 | 7.93E-32  | TNFRSF4    | 4 | IL7R_CD4 T |
| 845 | 1.27E-54  | 0.47274025 | 0.244 | 0.064 | 2.78E-50  | RCAN3      | 4 | IL7R_CD4 T |
| 846 | 2.86E-130 | 0.47060815 | 1     | 0.997 | 6.24E-126 | RPL34      | 4 | IL7R_CD4 T |
| 847 | 5.65E-46  | 0.46745321 | 0.252 | 0.076 | 1.23E-41  | ICOS       | 4 | IL7R_CD4 T |
| 848 | 3.18E-124 | 0.46420058 | 0.997 | 0.995 | 6.94E-120 | RPL32      | 4 | IL7R_CD4 T |
| 849 | 1.42E-83  | 0.46025941 | 0.976 | 0.947 | 3.10E-79  | RPS5       | 4 | IL7R_CD4 T |
| 850 | 2.28E-112 | 0.45919104 | 1     | 0.995 | 4.97E-108 | RPS8       | 4 | IL7R_CD4 T |
| 851 | 4.99E-134 | 0.4560245  | 1     | 0.997 | 1.09E-129 | RPL13      | 4 | IL7R_CD4 T |
| 852 | 3.02E-122 | 0.45281247 | 1     | 0.999 | 6.58E-118 | RPLP1      | 4 | IL7R_CD4 T |
| 853 | 1.86E-32  | 0.45228058 | 0.626 | 0.397 | 4.06E-28  | CD44       | 4 | IL7R_CD4 T |
| 854 | 1.90E-46  | 0.45178448 | 0.857 | 0.684 | 4.15E-42  | FXYD5      | 4 | IL7R_CD4 T |
| 855 | 3.30E-37  | 0.45061393 | 0.206 | 0.063 | 7.19E-33  | TCF7       | 4 | IL7R_CD4 T |
| 856 | 6.35E-97  | 0.44998993 | 0.992 | 0.975 | 1.38E-92  | RPL36      | 4 | IL7R_CD4 T |
| 857 | 1.25E-134 | 0.44903931 | 0.998 | 0.995 | 2.72E-130 | RPL11      | 4 | IL7R_CD4 T |
| 858 | 5.58E-28  | 0.44782227 | 0.49  | 0.284 | 1.22E-23  | NDFIP1     | 4 | IL7R_CD4 T |
| 859 | 1.32E-124 | 0.4425056  | 1     | 0.997 | 2.88E-120 | RPL39      | 4 | IL7R_CD4 T |
| 860 | 3.71E-38  | 0.43975108 | 0.38  | 0.165 | 8.09E-34  | CAMK4      | 4 | IL7R_CD4 T |
| 861 | 7.50E-98  | 0.43860719 | 0.998 | 0.988 | 1.64E-93  | RPS13      | 4 | IL7R_CD4 T |
| 862 | 5.15E-102 | 0.43752184 | 0.992 | 0.988 | 1.12E-97  | RPS18      | 4 | IL7R_CD4 T |
| 863 | 1.51E-113 | 0.43145238 | 0.994 | 0.991 | 3.30E-109 | RPL18A     | 4 | IL7R_CD4 T |
| 864 | 1.72E-111 | 0.42936661 | 0.998 | 0.988 | 3.74E-107 | RPL18      | 4 | IL7R_CD4 T |
| 865 | 1.27E-18  | 0.42928346 | 0.347 | 0.198 | 2.78E-14  | TOB1       | 4 | IL7R_CD4 T |
| 866 | 4.31E-18  | 0.42880709 | 0.219 | 0.104 | 9.39E-14  | SGK1       | 4 | IL7R_CD4 T |
| 867 | 7.28E-40  | 0.42475708 | 0.853 | 0.735 | 1.59E-35  | EEF1G      | 4 | IL7R_CD4 T |
| 868 | 7.08E-28  | 0.42386832 | 0.984 | 0.96  | 1.54E-23  | FTH1       | 4 | IL7R_CD4 T |
| 869 | 3.05E-38  | 0.42278818 | 0.788 | 0.595 | 6.65E-34  | EIF3E      | 4 | IL7R_CD4 T |
| 870 | 6.57E-125 | 0.41937219 | 1     | 0.995 | 1.43E-120 | RPS28      | 4 | IL7R_CD4 T |
| 871 | 5.89E-98  | 0.41655408 | 0.994 | 0.986 | 1.29E-93  | RPL12      | 4 | IL7R_CD4 T |
| 872 | 1.91E-125 | 0.41628991 | 1     | 0.998 | 4.16E-121 | RPL10      | 4 | IL7R_CD4 T |
| 873 | 1.15E-68  | 0.41507643 | 0.986 | 0.952 | 2.51E-64  | RPS2       | 4 | IL7R_CD4 T |
| 874 | 2.09E-98  | 0.41345608 | 0.997 | 0.986 | 4.55E-94  | RPS21      | 4 | IL7R_CD4 T |
| 875 | 1.27E-50  | 0.41130185 | 0.924 | 0.84  | 2.76E-46  | RPL7       | 4 | IL7R_CD4 T |
| 876 | 5.55E-30  | 0.41070179 | 0.368 | 0.175 | 1.21E-25  | INPP4B     | 4 | IL7R_CD4 T |
| 877 | 5.19E-89  | 0.40267987 | 0.997 | 0.984 | 1.13E-84  | RPS25      | 4 | IL7R_CD4 T |
| 878 | 8.92E-42  | 0.3987634  | 0.895 | 0.776 | 1.94E-37  | RPL36A     | 4 | IL7R_CD4 T |
| 879 | 1.53E-91  | 0.39772491 | 0.99  | 0.985 | 3.33E-87  | RPS10      | 4 | IL7R_CD4 T |
| 880 | 2.83E-68  | 0.39514104 | 0.978 | 0.956 | 6.16E-64  | RPL10A     | 4 | IL7R_CD4 T |
| 881 | 1.97E-75  | 0.39233505 | 0.998 | 0.982 | 4.30E-71  | RPS6       | 4 | IL7R_CD4 T |
| 882 | 5.79E-116 | 0.39202368 | 1     | 0.996 | 1.26E-111 | RPL30      | 4 | IL7R_CD4 T |
| 883 | 1.31E-22  | 0.39175432 | 0.238 | 0.106 | 2.87E-18  | SLAMF1     | 4 | IL7R_CD4 T |
| 884 | 3.92E-98  | 0.39124295 | 1     | 0.99  | 8.54E-94  | RPLP2      | 4 | IL7R_CD4 T |
| 885 | 1.11E-61  | 0.39104789 | 0.962 | 0.924 | 2.42E-57  | RPS9       | 4 | IL7R_CD4 T |
| 886 | 3.88E-60  | 0.39058616 | 0.987 | 0.956 | 8.46E-56  | RPL22      | 4 | IL7R_CD4 T |
| 887 | 1.09E-99  | 0.39025504 | 0.998 | 0.991 | 2.38E-95  | RPL37      | 4 | IL7R_CD4 T |
| 888 | 1.92E-29  | 0.39007085 | 0.338 | 0.156 | 4.19E-25  | AQP3       | 4 | IL7R_CD4 T |
| 889 | 7.74E-38  | 0.38717312 | 0.135 | 0.029 | 1.69E-33  | FRMD4B     | 4 | IL7R_CD4 T |
| 890 | 1.13E-98  | 0.38716008 | 0.998 | 0.992 | 2.46E-94  | RPS14      | 4 | IL7R_CD4 T |
| 891 | 3.04E-17  | 0.38537341 | 0.487 | 0.33  | 6.62E-13  | SAMSN1     | 4 | IL7R_CD4 T |
| 892 | 1.94E-85  | 0.3815449  | 0.995 | 0.987 | 4.23E-81  | RPL14      | 4 | IL7R_CD4 T |
| 893 | 1.01E-60  | 0.37620401 | 0.155 | 0.023 | 2.20E-56  | TRABD2A    | 4 | IL7R_CD4 T |
| 894 | 1.09E-85  | 0.37189569 | 0.997 | 0.985 | 2.37E-81  | RPL29      | 4 | IL7R_CD4 T |
| 895 | 1.27E-100 | 0.37161043 | 0.998 | 0.998 | 2.77E-96  | AC090498.1 | 4 | IL7R_CD4 T |
| 896 | 4.05E-12  | 0.37091903 | 0.274 | 0.163 | 8.84E-08  | SOD2       | 4 | IL7R_CD4 T |
| 897 | 3.12E-86  | 0.37072248 | 1     | 0.994 | 6.79E-82  | RPS3A      | 4 | IL7R_CD4 T |
| 898 | 3.51E-68  | 0.37004607 | 0.994 | 0.969 | 7.64E-64  | RPL8       | 4 | IL7R_CD4 T |
| 899 | 1.11E-28  | 0.36878921 | 0.33  | 0.152 | 2.43E-24  | CCDC109B   | 4 | IL7R_CD4 T |
| 900 | 4.91E-23  | 0.36751984 | 0.303 | 0.15  | 1.07E-18  | PAG1       | 4 | IL7R_CD4 T |
| 901 | 2.22E-25  | 0.36553459 | 0.417 | 0.227 | 4.84E-21  | RNASET2    | 4 | IL7R_CD4 T |
| 902 | 4.35E-11  | 0.36192579 | 0.298 | 0.188 | 9.48E-07  | BIRC3      | 4 | IL7R_CD4 T |
| 903 | 1.92E-93  | 0.36113118 | 0.997 | 0.992 | 4.19E-89  | RPS23      | 4 | IL7R_CD4 T |
| 904 | 2.68E-11  | 0.36083881 | 0.734 | 0.642 | 5.84E-07  | ANXA1      | 4 | IL7R_CD4 T |
| 905 | 2.37E-28  | 0.36038084 | 0.214 | 0.079 | 5.17E-24  | THEM4      | 4 | IL7R_CD4 T |
| 906 | 2.65E-23  | 0.35986091 | 0.704 | 0.547 | 5.78E-19  | GLTSCR2    | 4 | IL7R_CD4 T |
| 907 | 3.71E-23  | 0.35635685 | 0.228 | 0.097 | 8.10E-19  | TIMP1      | 4 | IL7R_CD4 T |
| 908 | 1.61E-38  | 0.35619551 | 0.162 | 0.04  | 3.51E-34  | SH3YL1     | 4 | IL7R_CD4 T |

|     |           |            |       |       |             |              |   |            |
|-----|-----------|------------|-------|-------|-------------|--------------|---|------------|
| 909 | 2.03E-92  | 0.35427524 | 0.998 | 0.994 | 4.42E-88    | RPL19        | 4 | IL7R_CD4 T |
| 910 | 1.85E-13  | 0.35186782 | 0.388 | 0.256 | 4.03E-09    | AIM1         | 4 | IL7R_CD4 T |
| 911 | 1.09E-43  | 0.35163645 | 0.954 | 0.888 | 2.37E-39    | RPL38        | 4 | IL7R_CD4 T |
| 912 | 1.78E-60  | 0.34548836 | 0.981 | 0.953 | 3.88E-56    | RPL24        | 4 | IL7R_CD4 T |
| 913 | 9.38E-24  | 0.34439535 | 0.212 | 0.086 | 2.05E-19    | CCR6         | 4 | IL7R_CD4 T |
| 914 | 8.65E-81  | 0.34400833 | 0.992 | 0.989 | 1.89E-76    | RPL35A       | 4 | IL7R_CD4 T |
| 915 | 7.15E-10  | 0.34344129 | 0.498 | 0.369 | 1.56E-05    | HSPD1        | 4 | IL7R_CD4 T |
| 916 | 8.73E-14  | 0.34225466 | 0.702 | 0.552 | 1.90E-09    | TNFAIP3      | 4 | IL7R_CD4 T |
| 917 | 6.05E-49  | 0.34194825 | 0.989 | 0.961 | 1.32E-44    | RPSA         | 4 | IL7R_CD4 T |
| 918 | 5.03E-67  | 0.34159556 | 0.99  | 0.987 | 1.10E-62    | RPS4X        | 4 | IL7R_CD4 T |
| 919 | 4.54E-106 | 0.33815895 | 0.125 | 0.004 | 9.91E-102   | IL6R         | 4 | IL7R_CD4 T |
| 920 | 1.33E-16  | 0.33702571 | 0.269 | 0.144 | 2.90E-12    | SOCS3        | 4 | IL7R_CD4 T |
| 921 | 3.26E-100 | 0.33644626 | 1     | 1     | 7.11E-96    | EEF1A1       | 4 | IL7R_CD4 T |
| 922 | 3.02E-21  | 0.33568761 | 0.537 | 0.345 | 6.59E-17    | SPOCK2       | 4 | IL7R_CD4 T |
| 923 | 1.58E-34  | 0.33566568 | 0.933 | 0.851 | 3.44E-30    | RPL4         | 4 | IL7R_CD4 T |
| 924 | 1.41E-50  | 0.3340016  | 0.984 | 0.971 | 3.07E-46    | RPL5         | 4 | IL7R_CD4 T |
| 925 | 2.25E-11  | 0.331712   | 0.388 | 0.271 | 4.90E-07    | UGP2         | 4 | IL7R_CD4 T |
| 926 | 4.90E-17  | 0.32818613 | 0.891 | 0.799 | 1.07E-12    | KLF6         | 4 | IL7R_CD4 T |
| 927 | 1.03E-47  | 0.32750254 | 0.976 | 0.948 | 2.24E-43    | GNB2L1       | 4 | IL7R_CD4 T |
| 928 | 4.66E-32  | 0.32646587 | 0.929 | 0.81  | 1.02E-27    | VIM          | 4 | IL7R_CD4 T |
| 929 | 2.85E-20  | 0.32610437 | 0.628 | 0.447 | 6.22E-16    | LEPROTL1     | 4 | IL7R_CD4 T |
| 930 | 1.12E-81  | 0.32428972 | 0.997 | 0.994 | 2.45E-77    | RPS15        | 4 | IL7R_CD4 T |
| 931 | 1.32E-18  | 0.32380645 | 0.3   | 0.16  | 2.88E-14    | TTC39C       | 4 | IL7R_CD4 T |
| 932 | 1.16E-87  | 0.32374953 | 0.997 | 0.998 | 2.54E-83    | RPS27A       | 4 | IL7R_CD4 T |
| 933 | 3.04E-54  | 0.32274802 | 0.986 | 0.97  | 6.63E-50    | RPS16        | 4 | IL7R_CD4 T |
| 934 | 3.91E-09  | 0.32226733 | 0.455 | 0.347 | 8.52E-05    | CD55         | 4 | IL7R_CD4 T |
| 935 | 4.80E-12  | 0.31994191 | 0.537 | 0.398 | 1.05E-07    | EZR          | 4 | IL7R_CD4 T |
| 936 | 3.49E-10  | 0.31962994 | 0.42  | 0.299 | 7.61E-06    | HSPB1        | 4 | IL7R_CD4 T |
| 937 | 6.53E-42  | 0.31851786 | 0.128 | 0.024 | 1.42E-37    | NCF4         | 4 | IL7R_CD4 T |
| 938 | 1.22E-21  | 0.31548702 | 0.32  | 0.162 | 2.65E-17    | TRAT1        | 4 | IL7R_CD4 T |
| 939 | 2.00E-41  | 0.31379394 | 0.987 | 0.958 | 4.35E-37    | RPS29        | 4 | IL7R_CD4 T |
| 940 | 3.13E-16  | 0.31324286 | 0.559 | 0.397 | 6.83E-12    | SNHG8        | 4 | IL7R_CD4 T |
| 941 | 1.46E-17  | 0.31150298 | 0.317 | 0.174 | 3.19E-13    | PDE4B        | 4 | IL7R_CD4 T |
| 942 | 9.51E-51  | 0.3105093  | 0.989 | 0.976 | 2.07E-46    | RPL17        | 4 | IL7R_CD4 T |
| 943 | 4.39E-27  | 0.30976924 | 0.19  | 0.067 | 9.57E-23    | TNFRSF25     | 4 | IL7R_CD4 T |
| 944 | 4.03E-71  | 0.30957239 | 0.998 | 0.997 | 8.78E-67    | RPS27        | 4 | IL7R_CD4 T |
| 945 | 1.37E-23  | 0.30863109 | 0.903 | 0.856 | 2.98E-19    | PABPC1       | 4 | IL7R_CD4 T |
| 946 | 1.93E-13  | 0.30820866 | 0.39  | 0.258 | 4.21E-09    | RGS10        | 4 | IL7R_CD4 T |
| 947 | 1.25E-20  | 0.30761888 | 0.211 | 0.091 | 2.72E-16    | CD28         | 4 | IL7R_CD4 T |
| 948 | 2.58E-57  | 0.30559843 | 0.992 | 0.987 | 5.64E-53    | RPL6         | 4 | IL7R_CD4 T |
| 949 | 7.23E-51  | 0.3053723  | 1     | 0.997 | 1.58E-46    | RPS19        | 4 | IL7R_CD4 T |
| 950 | 7.25E-22  | 0.30459613 | 0.17  | 0.064 | 1.58E-17    | SNX9         | 4 | IL7R_CD4 T |
| 951 | 1.43E-06  | 0.30425513 | 0.675 | 0.601 | 0.031281881 | CITED2       | 4 | IL7R_CD4 T |
| 952 | 4.04E-23  | 0.30136221 | 0.857 | 0.75  | 8.82E-19    | HINT1        | 4 | IL7R_CD4 T |
| 953 | 4.60E-35  | 0.30105016 | 0.143 | 0.033 | 1.00E-30    | AHR          | 4 | IL7R_CD4 T |
| 954 | 1.74E-17  | 0.29941759 | 0.406 | 0.246 | 3.79E-13    | CD6          | 4 | IL7R_CD4 T |
| 955 | 2.14E-18  | 0.29911879 | 0.165 | 0.067 | 4.66E-14    | MYC          | 4 | IL7R_CD4 T |
| 956 | 2.84E-84  | 0.29898903 | 0.997 | 0.998 | 6.19E-80    | RPS15A       | 4 | IL7R_CD4 T |
| 957 | 6.38E-45  | 0.29740573 | 0.989 | 0.952 | 1.39E-40    | RPL13A       | 4 | IL7R_CD4 T |
| 958 | 3.04E-81  | 0.29422519 | 1     | 0.998 | 6.63E-77    | RPL28        | 4 | IL7R_CD4 T |
| 959 | 4.82E-07  | 0.29395109 | 0.401 | 0.312 | 0.010507058 | BATF         | 4 | IL7R_CD4 T |
| 960 | 6.47E-07  | 0.29354242 | 0.334 | 0.257 | 0.014109719 | NOSIP        | 4 | IL7R_CD4 T |
| 961 | 6.04E-73  | 0.29339885 | 0.998 | 0.994 | 1.32E-68    | RPS3         | 4 | IL7R_CD4 T |
| 962 | 2.50E-13  | 0.29074954 | 0.409 | 0.267 | 5.44E-09    | ITK          | 4 | IL7R_CD4 T |
| 963 | 5.31E-15  | 0.29016863 | 0.233 | 0.123 | 1.16E-10    | SYPL1        | 4 | IL7R_CD4 T |
| 964 | 1.20E-36  | 0.28849634 | 0.124 | 0.025 | 2.61E-32    | SERINC5      | 4 | IL7R_CD4 T |
| 965 | 1.61E-17  | 0.2862851  | 0.277 | 0.146 | 3.50E-13    | FLT3LG       | 4 | IL7R_CD4 T |
| 966 | 3.63E-09  | 0.28574849 | 0.334 | 0.234 | 7.91E-05    | FOXP1        | 4 | IL7R_CD4 T |
| 967 | 1.98E-15  | 0.28538037 | 0.246 | 0.129 | 4.32E-11    | OXNAD1       | 4 | IL7R_CD4 T |
| 968 | 1.79E-17  | 0.2811509  | 0.204 | 0.094 | 3.91E-13    | TNFSF8       | 4 | IL7R_CD4 T |
| 969 | 9.53E-60  | 0.28008414 | 0.992 | 0.99  | 2.08E-55    | RPS7         | 4 | IL7R_CD4 T |
| 970 | 7.42E-15  | 0.27954827 | 0.227 | 0.117 | 1.62E-10    | TRADD        | 4 | IL7R_CD4 T |
| 971 | 4.11E-15  | 0.27797186 | 0.417 | 0.266 | 8.97E-11    | RSL1D1       | 4 | IL7R_CD4 T |
| 972 | 2.92E-19  | 0.27789583 | 0.255 | 0.122 | 6.36E-15    | CD5          | 4 | IL7R_CD4 T |
| 973 | 1.02E-22  | 0.27507143 | 0.903 | 0.836 | 2.22E-18    | EEF2         | 4 | IL7R_CD4 T |
| 974 | 8.24E-26  | 0.27274307 | 0.138 | 0.04  | 1.80E-21    | KDSR         | 4 | IL7R_CD4 T |
| 975 | 2.54E-24  | 0.27226801 | 0.932 | 0.858 | 5.55E-20    | RPL31        | 4 | IL7R_CD4 T |
| 976 | 8.42E-41  | 0.27080131 | 0.989 | 0.98  | 1.84E-36    | RPL3         | 4 | IL7R_CD4 T |
| 977 | 3.90E-40  | 0.26925934 | 0.995 | 0.979 | 8.51E-36    | RPL21        | 4 | IL7R_CD4 T |
| 978 | 1.40E-19  | 0.26902518 | 0.179 | 0.073 | 3.04E-15    | RP11-18H21.1 | 4 | IL7R_CD4 T |

|      |          |             |       |       |             |          |   |            |
|------|----------|-------------|-------|-------|-------------|----------|---|------------|
| 979  | 1.90E-25 | 0.26899554  | 0.937 | 0.889 | 4.13E-21    | RPL27    | 4 | IL7R_CD4 T |
| 980  | 1.06E-16 | 0.26806561  | 0.157 | 0.065 | 2.31E-12    | PDE3B    | 4 | IL7R_CD4 T |
| 981  | 2.28E-23 | 0.26720078  | 0.181 | 0.067 | 4.97E-19    | TMEM14C  | 4 | IL7R_CD4 T |
| 982  | 1.82E-20 | 0.26698052  | 0.197 | 0.082 | 3.96E-16    | CDC14A   | 4 | IL7R_CD4 T |
| 983  | 4.80E-12 | 0.26634434  | 0.274 | 0.163 | 1.05E-07    | CORO1B   | 4 | IL7R_CD4 T |
| 984  | 1.22E-31 | 0.2629914   | 0.973 | 0.95  | 2.67E-27    | RPL35    | 4 | IL7R_CD4 T |
| 985  | 2.72E-12 | 0.25957708  | 0.58  | 0.443 | 5.92E-08    | GSTK1    | 4 | IL7R_CD4 T |
| 986  | 2.04E-31 | 0.2586483   | 0.976 | 0.955 | 4.45E-27    | NACA     | 4 | IL7R_CD4 T |
| 987  | 1.20E-41 | 0.25803748  | 0.987 | 0.978 | 2.61E-37    | RPL23A   | 4 | IL7R_CD4 T |
| 988  | 6.51E-12 | 0.25797439  | 0.249 | 0.143 | 1.42E-07    | NCF1     | 4 | IL7R_CD4 T |
| 989  | 2.41E-17 | 0.25769446  | 0.846 | 0.765 | 5.27E-13    | NPM1     | 4 | IL7R_CD4 T |
| 990  | 1.67E-56 | 0.25721179  | 0.997 | 0.993 | 3.64E-52    | RPL26    | 4 | IL7R_CD4 T |
| 991  | 1.09E-16 | 0.2569175   | 0.219 | 0.105 | 2.37E-12    | DGKA     | 4 | IL7R_CD4 T |
| 992  | 2.75E-28 | 0.25668282  | 0.973 | 0.916 | 5.99E-24    | RPL41    | 4 | IL7R_CD4 T |
| 993  | 1.19E-25 | 0.25602499  | 0.13  | 0.037 | 2.59E-21    | CD82     | 4 | IL7R_CD4 T |
| 994  | 2.82E-09 | 0.25570517  | 0.425 | 0.316 | 6.15E-05    | ARHGAP15 | 4 | IL7R_CD4 T |
| 995  | 8.11E-23 | 0.25523456  | 0.921 | 0.862 | 1.77E-18    | RPS11    | 4 | IL7R_CD4 T |
| 996  | 5.29E-11 | 0.25327866  | 0.586 | 0.466 | 1.15E-06    | SMDT1    | 4 | IL7R_CD4 T |
| 997  | 2.10E-19 | 0.25258871  | 0.149 | 0.055 | 4.58E-15    | TESPA1   | 4 | IL7R_CD4 T |
| 998  | 4.74E-11 | 0.2515504   | 0.979 | 0.966 | 1.03E-06    | ZFP36L2  | 4 | IL7R_CD4 T |
| 999  | 2.24E-18 | 0.25041022  | 0.136 | 0.049 | 4.89E-14    | TNFRSF18 | 4 | IL7R_CD4 T |
| 1000 | 4.12E-07 | -0.25027256 | 0.155 | 0.238 | 0.008979151 | HSPB11   | 4 | IL7R_CD4 T |
| 1001 | 2.51E-07 | -0.25044325 | 0.187 | 0.28  | 0.00547891  | NUCB2    | 4 | IL7R_CD4 T |
| 1002 | 2.30E-08 | -0.25075627 | 0.113 | 0.203 | 0.000502113 | UBE2E3   | 4 | IL7R_CD4 T |
| 1003 | 4.65E-07 | -0.25128307 | 0.274 | 0.368 | 0.010135434 | GBP5     | 4 | IL7R_CD4 T |
| 1004 | 6.07E-08 | -0.25245351 | 0.17  | 0.265 | 0.001324088 | TSEN54   | 4 | IL7R_CD4 T |
| 1005 | 1.54E-07 | -0.25390435 | 0.127 | 0.213 | 0.003360361 | NFKBIB   | 4 | IL7R_CD4 T |
| 1006 | 2.17E-09 | -0.25526789 | 0.306 | 0.42  | 4.73E-05    | POMP     | 4 | IL7R_CD4 T |
| 1007 | 1.12E-09 | -0.25582689 | 0.532 | 0.601 | 2.45E-05    | TMBIM6   | 4 | IL7R_CD4 T |
| 1008 | 6.49E-09 | -0.25660904 | 0.255 | 0.363 | 0.000141581 | RUNX3    | 4 | IL7R_CD4 T |
| 1009 | 1.28E-09 | -0.25929241 | 0.138 | 0.245 | 2.80E-05    | RAB8A    | 4 | IL7R_CD4 T |
| 1010 | 1.40E-07 | -0.26005364 | 0.212 | 0.303 | 0.003055447 | DCTN3    | 4 | IL7R_CD4 T |
| 1011 | 1.06E-08 | -0.26083466 | 0.293 | 0.394 | 0.00023125  | BTN3A2   | 4 | IL7R_CD4 T |
| 1012 | 3.07E-07 | -0.26111853 | 0.113 | 0.192 | 0.006701529 | CDKN2D   | 4 | IL7R_CD4 T |
| 1013 | 1.73E-09 | -0.2617869  | 0.353 | 0.457 | 3.77E-05    | ARPC5    | 4 | IL7R_CD4 T |
| 1014 | 4.56E-09 | -0.26213278 | 0.353 | 0.453 | 9.95E-05    | ANXA6    | 4 | IL7R_CD4 T |
| 1015 | 3.04E-09 | -0.26247404 | 0.288 | 0.409 | 6.64E-05    | STOM     | 4 | IL7R_CD4 T |
| 1016 | 1.00E-09 | -0.26279654 | 0.284 | 0.402 | 2.18E-05    | SH2D1A   | 4 | IL7R_CD4 T |
| 1017 | 2.08E-08 | -0.26339233 | 0.261 | 0.365 | 0.000453731 | AKNA     | 4 | IL7R_CD4 T |
| 1018 | 1.14E-08 | -0.26509225 | 0.371 | 0.466 | 0.000247906 | ARL4C    | 4 | IL7R_CD4 T |
| 1019 | 2.16E-06 | -0.26518672 | 0.144 | 0.218 | 0.047136405 | GPATCH8  | 4 | IL7R_CD4 T |
| 1020 | 4.24E-08 | -0.26539717 | 0.117 | 0.205 | 0.000923972 | ACAA2    | 4 | IL7R_CD4 T |
| 1021 | 8.07E-15 | -0.26544266 | 0.746 | 0.816 | 1.76E-10    | CORO1A   | 4 | IL7R_CD4 T |
| 1022 | 3.58E-07 | -0.26552524 | 0.368 | 0.44  | 0.007810823 | RAC1     | 4 | IL7R_CD4 T |
| 1023 | 1.42E-08 | -0.26719394 | 0.311 | 0.408 | 0.000309207 | TBC1D10C | 4 | IL7R_CD4 T |
| 1024 | 5.16E-09 | -0.26761606 | 0.128 | 0.228 | 0.000112636 | MIEN1    | 4 | IL7R_CD4 T |
| 1025 | 2.08E-06 | -0.26766875 | 0.149 | 0.235 | 0.045392139 | CD8B     | 4 | IL7R_CD4 T |
| 1026 | 1.95E-11 | -0.26768003 | 0.49  | 0.591 | 4.25E-07    | ADGRE5   | 4 | IL7R_CD4 T |
| 1027 | 3.33E-08 | -0.26799421 | 0.563 | 0.609 | 0.000726108 | EMP3     | 4 | IL7R_CD4 T |
| 1028 | 1.91E-09 | -0.26834231 | 0.263 | 0.373 | 4.16E-05    | PTP4A2   | 4 | IL7R_CD4 T |
| 1029 | 7.21E-09 | -0.26888077 | 0.468 | 0.555 | 0.000157166 | HSP90B1  | 4 | IL7R_CD4 T |
| 1030 | 5.67E-21 | -0.26946587 | 0.902 | 0.938 | 1.24E-16    | PTPRC    | 4 | IL7R_CD4 T |
| 1031 | 1.79E-07 | -0.26961723 | 0.204 | 0.292 | 0.003912795 | C20orf24 | 4 | IL7R_CD4 T |
| 1032 | 6.87E-09 | -0.27064497 | 0.222 | 0.329 | 0.000149788 | ACTN4    | 4 | IL7R_CD4 T |
| 1033 | 4.51E-09 | -0.27154966 | 0.391 | 0.484 | 9.84E-05    | PSMB8    | 4 | IL7R_CD4 T |
| 1034 | 2.40E-14 | -0.2737957  | 0.693 | 0.76  | 5.23E-10    | SUB1     | 4 | IL7R_CD4 T |
| 1035 | 5.39E-08 | -0.27402204 | 0.133 | 0.22  | 0.001175958 | ADAM8    | 4 | IL7R_CD4 T |
| 1036 | 6.12E-10 | -0.27433742 | 0.166 | 0.278 | 1.33E-05    | RAB27A   | 4 | IL7R_CD4 T |
| 1037 | 7.27E-09 | -0.2767663  | 0.185 | 0.289 | 0.000158541 | TLN1     | 4 | IL7R_CD4 T |
| 1038 | 5.13E-08 | -0.27713721 | 0.35  | 0.437 | 0.001118082 | WDR1     | 4 | IL7R_CD4 T |
| 1039 | 3.94E-09 | -0.27736985 | 0.198 | 0.301 | 8.59E-05    | NDUFB7   | 4 | IL7R_CD4 T |
| 1040 | 1.45E-06 | -0.27746702 | 0.127 | 0.205 | 0.031654281 | FABP5    | 4 | IL7R_CD4 T |
| 1041 | 3.34E-20 | -0.27852817 | 0.805 | 0.871 | 7.29E-16    | H3F3A    | 4 | IL7R_CD4 T |
| 1042 | 4.80E-07 | -0.27874465 | 0.257 | 0.336 | 0.010458876 | SUN2     | 4 | IL7R_CD4 T |
| 1043 | 1.04E-07 | -0.28050328 | 0.306 | 0.394 | 0.002257252 | DOK2     | 4 | IL7R_CD4 T |
| 1044 | 1.56E-09 | -0.28222693 | 0.304 | 0.417 | 3.41E-05    | CFLAR    | 4 | IL7R_CD4 T |
| 1045 | 3.77E-10 | -0.2841328  | 0.376 | 0.476 | 8.22E-06    | CD164    | 4 | IL7R_CD4 T |
| 1046 | 2.19E-08 | -0.28522453 | 0.122 | 0.211 | 0.000476951 | PRKCB    | 4 | IL7R_CD4 T |
| 1047 | 7.25E-12 | -0.28554533 | 0.455 | 0.561 | 1.58E-07    | STK17A   | 4 | IL7R_CD4 T |
| 1048 | 7.90E-18 | -0.28577862 | 0.756 | 0.827 | 1.72E-13    | UBB      | 4 | IL7R_CD4 T |



|      |          |             |       |       |             |          |   |            |
|------|----------|-------------|-------|-------|-------------|----------|---|------------|
| 1049 | 5.09E-11 | -0.28623261 | 0.707 | 0.768 | 1.11E-06    | GADD45B  | 4 | IL7R_CD4 T |
| 1050 | 1.37E-06 | -0.28665503 | 0.158 | 0.234 | 0.029810831 | SERPINB9 | 4 | IL7R_CD4 T |
| 1051 | 6.15E-12 | -0.28819063 | 0.499 | 0.617 | 1.34E-07    | RARRES3  | 4 | IL7R_CD4 T |
| 1052 | 3.55E-08 | -0.28925994 | 0.342 | 0.448 | 0.000775129 | BAX      | 4 | IL7R_CD4 T |
| 1053 | 4.11E-09 | -0.28978858 | 0.285 | 0.382 | 8.97E-05    | SCP2     | 4 | IL7R_CD4 T |
| 1054 | 3.05E-08 | -0.29112794 | 0.139 | 0.23  | 0.000664154 | ARHGAP25 | 4 | IL7R_CD4 T |
| 1055 | 1.03E-07 | -0.29444316 | 0.124 | 0.205 | 0.002245419 | ITGB7    | 4 | IL7R_CD4 T |
| 1056 | 2.32E-09 | -0.29463768 | 0.108 | 0.205 | 5.06E-05    | PTPRE    | 4 | IL7R_CD4 T |
| 1057 | 1.49E-10 | -0.29617178 | 0.365 | 0.469 | 3.25E-06    | TAPBP    | 4 | IL7R_CD4 T |
| 1058 | 5.46E-28 | -0.29878695 | 0.767 | 0.87  | 1.19E-23    | CD99     | 4 | IL7R_CD4 T |
| 1059 | 1.52E-09 | -0.29933095 | 0.266 | 0.371 | 3.32E-05    | BST2     | 4 | IL7R_CD4 T |
| 1060 | 3.35E-15 | -0.29992722 | 0.642 | 0.716 | 7.30E-11    | PSME1    | 4 | IL7R_CD4 T |
| 1061 | 3.64E-25 | -0.29994847 | 0.81  | 0.885 | 7.93E-21    | PTPRCAP  | 4 | IL7R_CD4 T |
| 1062 | 4.72E-12 | -0.30076176 | 0.452 | 0.552 | 1.03E-07    | COX8A    | 4 | IL7R_CD4 T |
| 1063 | 1.46E-07 | -0.3011957  | 0.255 | 0.347 | 0.003192252 | BHLHE40  | 4 | IL7R_CD4 T |
| 1064 | 3.22E-09 | -0.30170302 | 0.261 | 0.361 | 7.02E-05    | PRELID1  | 4 | IL7R_CD4 T |
| 1065 | 1.66E-07 | -0.30184919 | 0.319 | 0.397 | 0.003618744 | SERPINB1 | 4 | IL7R_CD4 T |
| 1066 | 2.45E-12 | -0.30796412 | 0.347 | 0.467 | 5.34E-08    | PSME2    | 4 | IL7R_CD4 T |
| 1067 | 2.06E-13 | -0.31007789 | 0.393 | 0.521 | 4.50E-09    | PPP1CA   | 4 | IL7R_CD4 T |
| 1068 | 5.09E-11 | -0.31116515 | 0.365 | 0.473 | 1.11E-06    | IQGAP1   | 4 | IL7R_CD4 T |
| 1069 | 1.62E-08 | -0.31129616 | 0.158 | 0.254 | 0.000352448 | PMAIP1   | 4 | IL7R_CD4 T |
| 1070 | 9.07E-09 | -0.31247955 | 0.165 | 0.266 | 0.000197881 | RHOB     | 4 | IL7R_CD4 T |
| 1071 | 1.29E-09 | -0.31317162 | 0.209 | 0.311 | 2.80E-05    | BANF1    | 4 | IL7R_CD4 T |
| 1072 | 1.99E-10 | -0.31669396 | 0.238 | 0.355 | 4.34E-06    | PSMB10   | 4 | IL7R_CD4 T |
| 1073 | 8.00E-10 | -0.31723231 | 0.206 | 0.314 | 1.74E-05    | UTRN     | 4 | IL7R_CD4 T |
| 1074 | 1.64E-09 | -0.32039951 | 0.144 | 0.242 | 3.58E-05    | DIP2A    | 4 | IL7R_CD4 T |
| 1075 | 1.81E-18 | -0.3208113  | 0.635 | 0.743 | 3.95E-14    | IL2RG    | 4 | IL7R_CD4 T |
| 1076 | 8.45E-12 | -0.32146349 | 0.214 | 0.341 | 1.84E-07    | ARHGAP9  | 4 | IL7R_CD4 T |
| 1077 | 6.28E-13 | -0.32197136 | 0.209 | 0.343 | 1.37E-08    | CARD16   | 4 | IL7R_CD4 T |
| 1078 | 4.69E-15 | -0.32263756 | 0.396 | 0.539 | 1.02E-10    | C9orf142 | 4 | IL7R_CD4 T |
| 1079 | 1.58E-11 | -0.32278882 | 0.203 | 0.326 | 3.44E-07    | MYO1G    | 4 | IL7R_CD4 T |
| 1080 | 8.68E-12 | -0.32310352 | 0.176 | 0.305 | 1.89E-07    | PTPN4    | 4 | IL7R_CD4 T |
| 1081 | 3.68E-14 | -0.32539272 | 0.597 | 0.703 | 8.02E-10    | NR4A2    | 4 | IL7R_CD4 T |
| 1082 | 3.85E-10 | -0.32606    | 0.323 | 0.437 | 8.41E-06    | MAPRE2   | 4 | IL7R_CD4 T |
| 1083 | 7.99E-37 | -0.32835459 | 0.911 | 0.957 | 1.74E-32    | HLA-E    | 4 | IL7R_CD4 T |
| 1084 | 1.74E-21 | -0.32854052 | 0.886 | 0.921 | 3.80E-17    | IER2     | 4 | IL7R_CD4 T |
| 1085 | 2.47E-12 | -0.32962255 | 0.109 | 0.227 | 5.39E-08    | RAB9A    | 4 | IL7R_CD4 T |
| 1086 | 5.86E-08 | -0.33018367 | 0.225 | 0.312 | 0.001277661 | CKS2     | 4 | IL7R_CD4 T |
| 1087 | 1.56E-23 | -0.33025587 | 0.739 | 0.823 | 3.40E-19    | RAC2     | 4 | IL7R_CD4 T |
| 1088 | 1.29E-10 | -0.33169572 | 0.296 | 0.403 | 2.82E-06    | MBP      | 4 | IL7R_CD4 T |
| 1089 | 2.74E-10 | -0.33211559 | 0.163 | 0.274 | 5.97E-06    | TES      | 4 | IL7R_CD4 T |
| 1090 | 1.30E-12 | -0.3326538  | 0.374 | 0.487 | 2.83E-08    | PRKCH    | 4 | IL7R_CD4 T |
| 1091 | 3.79E-17 | -0.33275567 | 0.453 | 0.594 | 8.27E-13    | CAP1     | 4 | IL7R_CD4 T |
| 1092 | 2.49E-14 | -0.33363257 | 0.122 | 0.258 | 5.44E-10    | LAG3     | 4 | IL7R_CD4 T |
| 1093 | 1.57E-12 | -0.3341588  | 0.26  | 0.393 | 3.43E-08    | UCP2     | 4 | IL7R_CD4 T |
| 1094 | 1.55E-13 | -0.33852523 | 0.119 | 0.248 | 3.37E-09    | AGTRAP   | 4 | IL7R_CD4 T |
| 1095 | 1.34E-11 | -0.33888233 | 0.339 | 0.449 | 2.92E-07    | ZAP70    | 4 | IL7R_CD4 T |
| 1096 | 7.20E-13 | -0.3391677  | 0.257 | 0.382 | 1.57E-08    | BSG      | 4 | IL7R_CD4 T |
| 1097 | 1.62E-08 | -0.34041866 | 0.16  | 0.251 | 0.000352801 | TXK      | 4 | IL7R_CD4 T |
| 1098 | 9.14E-13 | -0.34291888 | 0.135 | 0.258 | 1.99E-08    | MYO1F    | 4 | IL7R_CD4 T |
| 1099 | 2.65E-13 | -0.34305641 | 0.151 | 0.285 | 5.78E-09    | C5orf56  | 4 | IL7R_CD4 T |
| 1100 | 8.84E-17 | -0.34383179 | 0.775 | 0.828 | 1.93E-12    | HMGB1    | 4 | IL7R_CD4 T |
| 1101 | 3.73E-12 | -0.34580748 | 0.384 | 0.511 | 8.14E-08    | IRF1     | 4 | IL7R_CD4 T |
| 1102 | 7.09E-29 | -0.34617802 | 0.914 | 0.952 | 1.55E-24    | IFITM1   | 4 | IL7R_CD4 T |
| 1103 | 2.40E-10 | -0.34926835 | 0.2   | 0.308 | 5.24E-06    | SPN      | 4 | IL7R_CD4 T |
| 1104 | 7.70E-15 | -0.34933143 | 0.361 | 0.504 | 1.68E-10    | BZW1     | 4 | IL7R_CD4 T |
| 1105 | 1.96E-27 | -0.34939222 | 0.694 | 0.814 | 4.28E-23    | CLIC1    | 4 | IL7R_CD4 T |
| 1106 | 3.71E-16 | -0.34966313 | 0.388 | 0.543 | 8.10E-12    | SYTL3    | 4 | IL7R_CD4 T |
| 1107 | 3.70E-12 | -0.34977953 | 0.228 | 0.356 | 8.07E-08    | PRKACB   | 4 | IL7R_CD4 T |
| 1108 | 2.38E-09 | -0.35379835 | 0.273 | 0.373 | 5.19E-05    | FLNA     | 4 | IL7R_CD4 T |
| 1109 | 1.27E-20 | -0.35433306 | 0.591 | 0.726 | 2.76E-16    | LCP1     | 4 | IL7R_CD4 T |
| 1110 | 4.62E-12 | -0.35891654 | 0.211 | 0.329 | 1.01E-07    | PPP3CC   | 4 | IL7R_CD4 T |
| 1111 | 2.51E-18 | -0.36701994 | 0.29  | 0.458 | 5.47E-14    | DHRS7    | 4 | IL7R_CD4 T |
| 1112 | 1.46E-12 | -0.36846149 | 0.141 | 0.266 | 3.17E-08    | SYNE1    | 4 | IL7R_CD4 T |
| 1113 | 1.64E-13 | -0.37336378 | 0.214 | 0.341 | 3.58E-09    | SASH3    | 4 | IL7R_CD4 T |
| 1114 | 1.21E-17 | -0.37505991 | 0.396 | 0.545 | 2.63E-13    | CLEC2B   | 4 | IL7R_CD4 T |
| 1115 | 7.82E-41 | -0.37520891 | 0.876 | 0.946 | 1.71E-36    | CFL1     | 4 | IL7R_CD4 T |
| 1116 | 7.40E-12 | -0.37714763 | 0.124 | 0.238 | 1.61E-07    | IFITM3   | 4 | IL7R_CD4 T |
| 1117 | 6.70E-16 | -0.38176655 | 0.162 | 0.314 | 1.46E-11    | APOBEC3G | 4 | IL7R_CD4 T |
| 1118 | 3.61E-13 | -0.38327944 | 0.307 | 0.432 | 7.86E-09    | TMEM2    | 4 | IL7R_CD4 T |

|      |           |             |       |       |           |          |   |            |
|------|-----------|-------------|-------|-------|-----------|----------|---|------------|
| 1119 | 5.48E-26  | -0.38385007 | 0.624 | 0.799 | 1.20E-21  | ID2      | 4 | IL7R_CD4 T |
| 1120 | 4.76E-13  | -0.38420971 | 0.374 | 0.502 | 1.04E-08  | PIK3R1   | 4 | IL7R_CD4 T |
| 1121 | 5.81E-17  | -0.39283741 | 0.422 | 0.558 | 1.27E-12  | PDIA3    | 4 | IL7R_CD4 T |
| 1122 | 8.25E-19  | -0.39459876 | 0.344 | 0.512 | 1.80E-14  | PPP1R18  | 4 | IL7R_CD4 T |
| 1123 | 1.71E-16  | -0.3981757  | 0.177 | 0.332 | 3.73E-12  | RASSF1   | 4 | IL7R_CD4 T |
| 1124 | 5.98E-17  | -0.40897127 | 0.423 | 0.562 | 1.30E-12  | CALR     | 4 | IL7R_CD4 T |
| 1125 | 4.42E-18  | -0.40962306 | 0.244 | 0.406 | 9.63E-14  | HMG3     | 4 | IL7R_CD4 T |
| 1126 | 2.06E-83  | -0.41007141 | 0.986 | 0.994 | 4.50E-79  | HLA-A    | 4 | IL7R_CD4 T |
| 1127 | 2.32E-76  | -0.41670061 | 0.971 | 0.992 | 5.05E-72  | HLA-C    | 4 | IL7R_CD4 T |
| 1128 | 9.98E-92  | -0.41719992 | 0.989 | 0.998 | 2.18E-87  | HLA-B    | 4 | IL7R_CD4 T |
| 1129 | 6.03E-16  | -0.41895769 | 0.166 | 0.314 | 1.32E-11  | ITGAL    | 4 | IL7R_CD4 T |
| 1130 | 3.87E-35  | -0.42095508 | 0.696 | 0.826 | 8.45E-31  | ARPC2    | 4 | IL7R_CD4 T |
| 1131 | 2.26E-18  | -0.42201991 | 0.328 | 0.484 | 4.93E-14  | BIN2     | 4 | IL7R_CD4 T |
| 1132 | 1.66E-16  | -0.42348173 | 0.136 | 0.281 | 3.63E-12  | RAB29    | 4 | IL7R_CD4 T |
| 1133 | 7.79E-23  | -0.4272066  | 0.326 | 0.507 | 1.70E-18  | DBI      | 4 | IL7R_CD4 T |
| 1134 | 2.10E-25  | -0.42752722 | 0.507 | 0.648 | 4.59E-21  | 7-Sep    | 4 | IL7R_CD4 T |
| 1135 | 4.36E-20  | -0.42769981 | 0.309 | 0.483 | 9.51E-16  | CTSD     | 4 | IL7R_CD4 T |
| 1136 | 3.47E-25  | -0.4358696  | 0.544 | 0.68  | 7.57E-21  | RAP1B    | 4 | IL7R_CD4 T |
| 1137 | 1.57E-30  | -0.44170912 | 0.387 | 0.615 | 3.42E-26  | FYN      | 4 | IL7R_CD4 T |
| 1138 | 5.76E-18  | -0.44291153 | 0.19  | 0.352 | 1.26E-13  | SAMD3    | 4 | IL7R_CD4 T |
| 1139 | 1.88E-11  | -0.44533241 | 0.197 | 0.324 | 4.11E-07  | IER3     | 4 | IL7R_CD4 T |
| 1140 | 5.04E-20  | -0.45545679 | 0.179 | 0.354 | 1.10E-15  | RHOC     | 4 | IL7R_CD4 T |
| 1141 | 1.72E-18  | -0.45545759 | 0.141 | 0.297 | 3.75E-14  | CHST12   | 4 | IL7R_CD4 T |
| 1142 | 3.06E-31  | -0.45666857 | 0.455 | 0.643 | 6.68E-27  | PSMB9    | 4 | IL7R_CD4 T |
| 1143 | 4.59E-78  | -0.46616861 | 0.998 | 0.998 | 1.00E-73  | ACTB     | 4 | IL7R_CD4 T |
| 1144 | 2.04E-70  | -0.46985005 | 0.946 | 0.983 | 4.45E-66  | PFN1     | 4 | IL7R_CD4 T |
| 1145 | 4.75E-25  | -0.47166324 | 0.353 | 0.536 | 1.04E-20  | SLC9A3R1 | 4 | IL7R_CD4 T |
| 1146 | 2.86E-33  | -0.47201759 | 0.469 | 0.666 | 6.23E-29  | LSP1     | 4 | IL7R_CD4 T |
| 1147 | 1.60E-24  | -0.47683621 | 0.333 | 0.519 | 3.50E-20  | FAM49B   | 4 | IL7R_CD4 T |
| 1148 | 1.57E-20  | -0.48023867 | 0.254 | 0.429 | 3.42E-16  | DENND2D  | 4 | IL7R_CD4 T |
| 1149 | 1.23E-21  | -0.50479709 | 0.111 | 0.284 | 2.67E-17  | MAPK1    | 4 | IL7R_CD4 T |
| 1150 | 3.36E-36  | -0.50566666 | 0.837 | 0.893 | 7.33E-32  | IFITM2   | 4 | IL7R_CD4 T |
| 1151 | 2.57E-28  | -0.51208933 | 0.292 | 0.496 | 5.61E-24  | ARPC5L   | 4 | IL7R_CD4 T |
| 1152 | 2.44E-24  | -0.51564758 | 0.124 | 0.313 | 5.31E-20  | TPST2    | 4 | IL7R_CD4 T |
| 1153 | 5.02E-25  | -0.51636268 | 0.239 | 0.431 | 1.10E-20  | PTPN6    | 4 | IL7R_CD4 T |
| 1154 | 1.18E-29  | -0.5190676  | 0.469 | 0.641 | 2.58E-25  | GNG2     | 4 | IL7R_CD4 T |
| 1155 | 2.51E-25  | -0.51943877 | 0.216 | 0.417 | 5.47E-21  | CD63     | 4 | IL7R_CD4 T |
| 1156 | 3.14E-10  | -0.52381492 | 0.385 | 0.474 | 6.84E-06  | ARL6IP1  | 4 | IL7R_CD4 T |
| 1157 | 6.95E-44  | -0.54347618 | 0.655 | 0.815 | 1.52E-39  | CYBA     | 4 | IL7R_CD4 T |
| 1158 | 2.94E-61  | -0.54757441 | 0.735 | 0.895 | 6.42E-57  | HCST     | 4 | IL7R_CD4 T |
| 1159 | 2.17E-20  | -0.55179517 | 0.29  | 0.484 | 4.73E-16  | GZMK     | 4 | IL7R_CD4 T |
| 1160 | 3.32E-27  | -0.55539735 | 0.216 | 0.449 | 7.23E-23  | CD8A     | 4 | IL7R_CD4 T |
| 1161 | 3.42E-22  | -0.56206522 | 0.441 | 0.63  | 7.45E-18  | KLRB1    | 4 | IL7R_CD4 T |
| 1162 | 1.80E-18  | -0.57323451 | 0.19  | 0.345 | 3.93E-14  | KLRG1    | 4 | IL7R_CD4 T |
| 1163 | 3.87E-32  | -0.58823062 | 0.344 | 0.566 | 8.44E-28  | GPR65    | 4 | IL7R_CD4 T |
| 1164 | 1.01E-31  | -0.59564311 | 0.127 | 0.357 | 2.19E-27  | MATK     | 4 | IL7R_CD4 T |
| 1165 | 1.04E-26  | -0.59705959 | 0.155 | 0.364 | 2.27E-22  | HLA-DQB1 | 4 | IL7R_CD4 T |
| 1166 | 1.15E-24  | -0.60399008 | 0.187 | 0.377 | 2.51E-20  | PLAC8    | 4 | IL7R_CD4 T |
| 1167 | 3.29E-26  | -0.61412051 | 0.158 | 0.359 | 7.17E-22  | IL2RB    | 4 | IL7R_CD4 T |
| 1168 | 4.24E-56  | -0.63442956 | 0.732 | 0.876 | 9.25E-52  | DUSP2    | 4 | IL7R_CD4 T |
| 1169 | 6.91E-49  | -0.63710587 | 0.315 | 0.62  | 1.51E-44  | CTSC     | 4 | IL7R_CD4 T |
| 1170 | 3.28E-38  | -0.65126067 | 0.212 | 0.475 | 7.14E-34  | HLA-DPB1 | 4 | IL7R_CD4 T |
| 1171 | 1.33E-37  | -0.66539848 | 0.195 | 0.448 | 2.91E-33  | PYHIN1   | 4 | IL7R_CD4 T |
| 1172 | 8.58E-51  | -0.68320181 | 0.434 | 0.695 | 1.87E-46  | ITGB2    | 4 | IL7R_CD4 T |
| 1173 | 3.71E-42  | -0.68571361 | 0.19  | 0.474 | 8.08E-38  | HLA-DPA1 | 4 | IL7R_CD4 T |
| 1174 | 2.06E-42  | -0.68706562 | 0.266 | 0.55  | 4.50E-38  | HOPX     | 4 | IL7R_CD4 T |
| 1175 | 6.62E-36  | -0.6873963  | 0.136 | 0.384 | 1.44E-31  | C12orf75 | 4 | IL7R_CD4 T |
| 1176 | 1.09E-48  | -0.69582745 | 0.276 | 0.566 | 2.37E-44  | GZMM     | 4 | IL7R_CD4 T |
| 1177 | 1.36E-45  | -0.69968906 | 0.187 | 0.48  | 2.96E-41  | APMAP    | 4 | IL7R_CD4 T |
| 1178 | 4.48E-38  | -0.70366035 | 0.174 | 0.436 | 9.77E-34  | MAP3K8   | 4 | IL7R_CD4 T |
| 1179 | 2.20E-38  | -0.70562771 | 0.1   | 0.353 | 4.80E-34  | NCR3     | 4 | IL7R_CD4 T |
| 1180 | 4.54E-38  | -0.72588587 | 0.301 | 0.538 | 9.90E-34  | TRBC1    | 4 | IL7R_CD4 T |
| 1181 | 8.43E-54  | -0.73882248 | 0.376 | 0.649 | 1.84E-49  | LITAF    | 4 | IL7R_CD4 T |
| 1182 | 1.73E-45  | -0.77120019 | 0.315 | 0.567 | 3.77E-41  | GSTP1    | 4 | IL7R_CD4 T |
| 1183 | 2.10E-70  | -0.78710831 | 0.493 | 0.773 | 4.57E-66  | CD7      | 4 | IL7R_CD4 T |
| 1184 | 4.49E-54  | -0.80329305 | 0.372 | 0.635 | 9.79E-50  | CD247    | 4 | IL7R_CD4 T |
| 1185 | 3.15E-45  | -0.84967486 | 0.185 | 0.49  | 6.87E-41  | IFNG     | 4 | IL7R_CD4 T |
| 1186 | 1.26E-54  | -0.85246531 | 0.258 | 0.566 | 2.75E-50  | HLA-DRB1 | 4 | IL7R_CD4 T |
| 1187 | 2.90E-86  | -0.8869693  | 0.537 | 0.829 | 6.32E-82  | CD74     | 4 | IL7R_CD4 T |
| 1188 | 1.01E-133 | -0.99229916 | 0.372 | 0.883 | 2.21E-129 | GZMA     | 4 | IL7R_CD4 T |

|      |           |             |       |       |           |          |   |            |
|------|-----------|-------------|-------|-------|-----------|----------|---|------------|
| 1189 | 3.26E-56  | -1.17300871 | 0.132 | 0.447 | 7.12E-52  | SPON2    | 4 | IL7R_CD4 T |
| 1190 | 9.79E-91  | -1.32165651 | 0.133 | 0.573 | 2.13E-86  | GZMH     | 4 | IL7R_CD4 T |
| 1191 | 6.85E-207 | -1.34363067 | 0.483 | 0.957 | 1.49E-202 | CCL5     | 4 | IL7R_CD4 T |
| 1192 | 3.03E-193 | -1.3600958  | 0.452 | 0.918 | 6.61E-189 | CST7     | 4 | IL7R_CD4 T |
| 1193 | 6.32E-137 | -1.45376437 | 0.214 | 0.723 | 1.38E-132 | CTSW     | 4 | IL7R_CD4 T |
| 1194 | 3.26E-153 | -1.66792043 | 0.241 | 0.759 | 7.10E-149 | PRF1     | 4 | IL7R_CD4 T |
| 1195 | 4.73E-204 | -1.78226196 | 0.322 | 0.945 | 1.03E-199 | CCL4     | 4 | IL7R_CD4 T |
| 1196 | 5.94E-121 | -1.86302833 | 0.155 | 0.633 | 1.30E-116 | CMC1     | 4 | IL7R_CD4 T |
| 1197 | 9.69E-133 | -1.99465407 | 0.187 | 0.729 | 2.11E-128 | CCL4L2   | 4 | IL7R_CD4 T |
| 1198 | 4.46E-303 | -2.68488193 | 0.225 | 0.958 | 9.74E-299 | NKG7     | 4 | IL7R_CD4 T |
| 1199 | 5.61E-204 | 2.38899168  | 0.387 | 0.034 | 1.22E-199 | PTGDS    | 5 | PTGDS_NK   |
| 1200 | 0         | 1.87795879  | 0.828 | 0.086 | 0         | FCER1G   | 5 | PTGDS_NK   |
| 1201 | 1.79E-271 | 1.37052446  | 0.414 | 0.025 | 3.91E-267 | MYOM2    | 5 | PTGDS_NK   |
| 1202 | 1.94E-96  | 1.30283153  | 0.769 | 0.366 | 4.22E-92  | AREG     | 5 | PTGDS_NK   |
| 1203 | 4.50E-152 | 1.25878262  | 0.88  | 0.374 | 9.81E-148 | SPON2    | 5 | PTGDS_NK   |
| 1204 | 1.97E-161 | 1.23721827  | 0.971 | 0.398 | 4.29E-157 | GZMB     | 5 | PTGDS_NK   |
| 1205 | 1.15E-73  | 1.21084936  | 0.767 | 0.432 | 2.50E-69  | CCL3     | 5 | PTGDS_NK   |
| 1206 | 1.08E-89  | 1.17189046  | 0.335 | 0.066 | 2.36E-85  | LAIR2    | 5 | PTGDS_NK   |
| 1207 | 2.64E-81  | 1.01338583  | 0.618 | 0.244 | 5.76E-77  | CLIC3    | 5 | PTGDS_NK   |
| 1208 | 3.21E-127 | 0.97119239  | 0.984 | 0.68  | 6.99E-123 | PRF1     | 5 | PTGDS_NK   |
| 1209 | 4.73E-116 | 0.95735628  | 0.826 | 0.302 | 1.03E-111 | FCGR3A   | 5 | PTGDS_NK   |
| 1210 | 8.40E-103 | 0.94698408  | 0.566 | 0.165 | 1.83E-98  | SH2D1B   | 5 | PTGDS_NK   |
| 1211 | 7.01E-112 | 0.89000433  | 0.973 | 0.541 | 1.53E-107 | KLRD1    | 5 | PTGDS_NK   |
| 1212 | 1.28E-103 | 0.86968598  | 0.364 | 0.067 | 2.80E-99  | C1orf162 | 5 | PTGDS_NK   |
| 1213 | 1.70E-92  | 0.86291347  | 0.776 | 0.295 | 3.71E-88  | FGFBP2   | 5 | PTGDS_NK   |
| 1214 | 6.18E-99  | 0.85625685  | 0.821 | 0.342 | 1.35E-94  | KLRF1    | 5 | PTGDS_NK   |
| 1215 | 7.64E-53  | 0.79084574  | 0.62  | 0.335 | 1.67E-48  | PLAC8    | 5 | PTGDS_NK   |
| 1216 | 1.95E-124 | 0.77380607  | 1     | 0.869 | 4.25E-120 | NKG7     | 5 | PTGDS_NK   |
| 1217 | 3.59E-79  | 0.77029369  | 0.887 | 0.583 | 7.82E-75  | CD247    | 5 | PTGDS_NK   |
| 1218 | 1.47E-46  | 0.76097293  | 0.652 | 0.388 | 3.22E-42  | MAP3K8   | 5 | PTGDS_NK   |
| 1219 | 3.34E-44  | 0.7588326   | 0.274 | 0.079 | 7.27E-40  | KIR2DL3  | 5 | PTGDS_NK   |
| 1220 | 1.22E-58  | 0.75537192  | 0.419 | 0.142 | 2.66E-54  | TMIGD2   | 5 | PTGDS_NK   |
| 1221 | 2.44E-51  | 0.75166413  | 0.274 | 0.071 | 5.32E-47  | KIR3DL2  | 5 | PTGDS_NK   |
| 1222 | 9.62E-45  | 0.7491397   | 0.464 | 0.206 | 2.10E-40  | IFITM3   | 5 | PTGDS_NK   |
| 1223 | 2.54E-48  | 0.74666474  | 0.98  | 0.87  | 5.55E-44  | CCL4     | 5 | PTGDS_NK   |
| 1224 | 1.10E-81  | 0.74547267  | 0.333 | 0.069 | 2.40E-77  | AKR1C3   | 5 | PTGDS_NK   |
| 1225 | 3.83E-92  | 0.74450469  | 0.937 | 0.43  | 8.35E-88  | TYROBP   | 5 | PTGDS_NK   |
| 1226 | 1.15E-40  | 0.73870224  | 0.864 | 0.753 | 2.52E-36  | GADD45B  | 5 | PTGDS_NK   |
| 1227 | 2.64E-68  | 0.73042521  | 0.796 | 0.348 | 5.76E-64  | GNLY     | 5 | PTGDS_NK   |
| 1228 | 6.27E-68  | 0.72139851  | 0.335 | 0.082 | 1.37E-63  | HAVCR2   | 5 | PTGDS_NK   |
| 1229 | 8.10E-55  | 0.69049482  | 0.357 | 0.108 | 1.77E-50  | FCRL3    | 5 | PTGDS_NK   |
| 1230 | 3.92E-52  | 0.66669576  | 0.41  | 0.139 | 8.54E-48  | IGFBP7   | 5 | PTGDS_NK   |
| 1231 | 1.23E-67  | 0.66662594  | 0.914 | 0.648 | 2.69E-63  | CTSW     | 5 | PTGDS_NK   |
| 1232 | 2.25E-74  | 0.66326475  | 0.937 | 0.727 | 4.91E-70  | CD7      | 5 | PTGDS_NK   |
| 1233 | 5.41E-38  | 0.65711263  | 0.339 | 0.127 | 1.18E-33  | CX3CR1   | 5 | PTGDS_NK   |
| 1234 | 2.65E-16  | 0.63983261  | 0.446 | 0.299 | 5.78E-12  | IER3     | 5 | PTGDS_NK   |
| 1235 | 4.04E-46  | 0.63104162  | 0.498 | 0.22  | 8.81E-42  | TXK      | 5 | PTGDS_NK   |
| 1236 | 7.51E-31  | 0.61192337  | 0.561 | 0.342 | 1.64E-26  | CD55     | 5 | PTGDS_NK   |
| 1237 | 1.10E-35  | 0.60494748  | 0.471 | 0.232 | 2.41E-31  | S1PR5    | 5 | PTGDS_NK   |
| 1238 | 5.79E-60  | 0.60343103  | 0.984 | 0.858 | 1.26E-55  | CST7     | 5 | PTGDS_NK   |
| 1239 | 3.39E-33  | 0.58967298  | 0.534 | 0.308 | 7.38E-29  | SELPLG   | 5 | PTGDS_NK   |
| 1240 | 1.62E-28  | 0.58767977  | 0.43  | 0.228 | 3.54E-24  | ICAM2    | 5 | PTGDS_NK   |
| 1241 | 1.48E-26  | 0.58460123  | 0.258 | 0.097 | 3.22E-22  | KIR2DL1  | 5 | PTGDS_NK   |
| 1242 | 7.94E-35  | 0.5835779   | 0.312 | 0.118 | 1.73E-30  | GSAP     | 5 | PTGDS_NK   |
| 1243 | 3.64E-38  | 0.58053421  | 0.296 | 0.1   | 7.94E-34  | CD38     | 5 | PTGDS_NK   |
| 1244 | 7.67E-26  | 0.56246901  | 0.527 | 0.321 | 1.67E-21  | BHLHE40  | 5 | PTGDS_NK   |
| 1245 | 4.92E-26  | 0.56063249  | 0.319 | 0.145 | 1.07E-21  | MCTP2    | 5 | PTGDS_NK   |
| 1246 | 8.77E-37  | 0.55186119  | 0.5   | 0.231 | 1.91E-32  | ADGRG1   | 5 | PTGDS_NK   |
| 1247 | 2.04E-37  | 0.54360085  | 0.247 | 0.073 | 4.46E-33  | ITGAM    | 5 | PTGDS_NK   |
| 1248 | 3.96E-42  | 0.54110466  | 0.833 | 0.653 | 8.64E-38  | ITGB2    | 5 | PTGDS_NK   |
| 1249 | 2.03E-27  | 0.53779653  | 0.428 | 0.225 | 4.42E-23  | EFHD2    | 5 | PTGDS_NK   |
| 1250 | 1.27E-37  | 0.53719438  | 0.287 | 0.096 | 2.76E-33  | PTPN12   | 5 | PTGDS_NK   |
| 1251 | 3.00E-63  | 0.5306072   | 0.197 | 0.031 | 6.54E-59  | GSN      | 5 | PTGDS_NK   |
| 1252 | 1.11E-36  | 0.53051182  | 0.147 | 0.029 | 2.43E-32  | KIR2DL4  | 5 | PTGDS_NK   |
| 1253 | 2.93E-29  | 0.53014795  | 0.584 | 0.348 | 6.39E-25  | ZEB2     | 5 | PTGDS_NK   |
| 1254 | 2.97E-29  | 0.51936981  | 0.6   | 0.378 | 6.47E-25  | PLEK     | 5 | PTGDS_NK   |
| 1255 | 2.72E-38  | 0.51333687  | 0.253 | 0.075 | 5.93E-34  | NCR1     | 5 | PTGDS_NK   |
| 1256 | 2.05E-27  | 0.51203946  | 0.794 | 0.67  | 4.48E-23  | NEAT1    | 5 | PTGDS_NK   |
| 1257 | 1.24E-28  | 0.50772668  | 0.344 | 0.152 | 2.71E-24  | HSH2D    | 5 | PTGDS_NK   |
| 1258 | 5.79E-25  | 0.50622987  | 0.312 | 0.137 | 1.26E-20  | C1orf21  | 5 | PTGDS_NK   |

|      |          |            |       |       |             |              |   |          |
|------|----------|------------|-------|-------|-------------|--------------|---|----------|
| 1259 | 2.52E-17 | 0.50005638 | 0.364 | 0.21  | 5.49E-13    | AOAH         | 5 | PTGDS_NK |
| 1260 | 1.73E-23 | 0.49944714 | 0.731 | 0.604 | 3.77E-19    | SQSTM1       | 5 | PTGDS_NK |
| 1261 | 8.66E-25 | 0.4927355  | 0.633 | 0.45  | 1.89E-20    | CTSD         | 5 | PTGDS_NK |
| 1262 | 7.88E-31 | 0.49003466 | 0.188 | 0.053 | 1.72E-26    | RASSF4       | 5 | PTGDS_NK |
| 1263 | 4.03E-23 | 0.48977984 | 0.419 | 0.232 | 8.80E-19    | PXN          | 5 | PTGDS_NK |
| 1264 | 1.02E-24 | 0.48916761 | 0.636 | 0.457 | 2.22E-20    | LIMD2        | 5 | PTGDS_NK |
| 1265 | 8.13E-56 | 0.48909536 | 0.993 | 0.972 | 1.77E-51    | SRGN         | 5 | PTGDS_NK |
| 1266 | 7.59E-33 | 0.48340097 | 0.208 | 0.06  | 1.66E-28    | TBXAS1       | 5 | PTGDS_NK |
| 1267 | 1.44E-53 | 0.48107127 | 0.975 | 0.879 | 3.14E-49    | IFITM2       | 5 | PTGDS_NK |
| 1268 | 6.34E-45 | 0.47931199 | 0.172 | 0.033 | 1.38E-40    | CHST2        | 5 | PTGDS_NK |
| 1269 | 7.74E-62 | 0.47596764 | 0.995 | 0.944 | 1.69E-57    | IFITM1       | 5 | PTGDS_NK |
| 1270 | 1.20E-19 | 0.4754403  | 0.317 | 0.158 | 2.61E-15    | FGR          | 5 | PTGDS_NK |
| 1271 | 2.39E-31 | 0.4734715  | 0.9   | 0.776 | 5.20E-27    | NFKBIA       | 5 | PTGDS_NK |
| 1272 | 5.53E-89 | 0.47187121 | 0.122 | 0.005 | 1.21E-84    | RAMP1        | 5 | PTGDS_NK |
| 1273 | 1.10E-19 | 0.46934688 | 0.622 | 0.492 | 2.39E-15    | LY6E         | 5 | PTGDS_NK |
| 1274 | 1.21E-25 | 0.46933929 | 0.301 | 0.127 | 2.64E-21    | PRSS23       | 5 | PTGDS_NK |
| 1275 | 1.60E-22 | 0.46920163 | 0.353 | 0.175 | 3.48E-18    | TTC38        | 5 | PTGDS_NK |
| 1276 | 6.35E-34 | 0.46756318 | 0.821 | 0.652 | 1.39E-29    | RAP1B        | 5 | PTGDS_NK |
| 1277 | 5.11E-21 | 0.46644183 | 0.726 | 0.614 | 1.11E-16    | GNG2         | 5 | PTGDS_NK |
| 1278 | 9.16E-20 | 0.46581171 | 0.269 | 0.126 | 2.00E-15    | CEP78        | 5 | PTGDS_NK |
| 1279 | 3.44E-13 | 0.46451093 | 0.344 | 0.217 | 7.50E-09    | GBP2         | 5 | PTGDS_NK |
| 1280 | 5.67E-15 | 0.46407794 | 0.624 | 0.518 | 1.24E-10    | SYTL3        | 5 | PTGDS_NK |
| 1281 | 8.40E-17 | 0.46027981 | 0.33  | 0.185 | 1.83E-12    | YES1         | 5 | PTGDS_NK |
| 1282 | 4.54E-16 | 0.45933448 | 0.251 | 0.125 | 9.89E-12    | MAFF         | 5 | PTGDS_NK |
| 1283 | 2.56E-23 | 0.45354526 | 0.258 | 0.106 | 5.59E-19    | UBE2F        | 5 | PTGDS_NK |
| 1284 | 3.55E-31 | 0.45038728 | 0.794 | 0.605 | 7.73E-27    | LITAF        | 5 | PTGDS_NK |
| 1285 | 5.50E-20 | 0.44923557 | 0.6   | 0.436 | 1.20E-15    | APMAP        | 5 | PTGDS_NK |
| 1286 | 3.88E-21 | 0.44332798 | 0.215 | 0.084 | 8.46E-17    | FNDC3B       | 5 | PTGDS_NK |
| 1287 | 1.58E-43 | 0.44289744 | 0.14  | 0.022 | 3.45E-39    | ADAMTS1      | 5 | PTGDS_NK |
| 1288 | 3.11E-14 | 0.44164387 | 0.247 | 0.13  | 6.77E-10    | IL18RAP      | 5 | PTGDS_NK |
| 1289 | 1.07E-20 | 0.43875406 | 0.69  | 0.571 | 2.33E-16    | JAK1         | 5 | PTGDS_NK |
| 1290 | 2.05E-16 | 0.43633826 | 0.518 | 0.378 | 4.46E-12    | SERPINB1     | 5 | PTGDS_NK |
| 1291 | 1.20E-17 | 0.43398608 | 0.385 | 0.224 | 2.61E-13    | GNPTAB       | 5 | PTGDS_NK |
| 1292 | 3.17E-23 | 0.43158571 | 0.686 | 0.522 | 6.91E-19    | GZMM         | 5 | PTGDS_NK |
| 1293 | 2.26E-17 | 0.42981523 | 0.412 | 0.253 | 4.93E-13    | MAPK1        | 5 | PTGDS_NK |
| 1294 | 6.96E-14 | 0.42766083 | 0.498 | 0.37  | 1.52E-09    | TCF25        | 5 | PTGDS_NK |
| 1295 | 3.27E-29 | 0.42219575 | 0.869 | 0.792 | 7.12E-25    | CYBA         | 5 | PTGDS_NK |
| 1296 | 1.76E-07 | 0.42039416 | 0.326 | 0.237 | 0.003845166 | PMAIP1       | 5 | PTGDS_NK |
| 1297 | 1.25E-17 | 0.42034953 | 0.249 | 0.117 | 2.72E-13    | GFOD1        | 5 | PTGDS_NK |
| 1298 | 1.55E-07 | 0.41931123 | 0.324 | 0.243 | 0.003390851 | HIF1A        | 5 | PTGDS_NK |
| 1299 | 8.35E-17 | 0.41796402 | 0.26  | 0.128 | 1.82E-12    | ZBTB16       | 5 | PTGDS_NK |
| 1300 | 2.93E-16 | 0.41793035 | 0.206 | 0.09  | 6.39E-12    | IRF8         | 5 | PTGDS_NK |
| 1301 | 2.62E-14 | 0.41713682 | 0.357 | 0.221 | 5.72E-10    | DIP2A        | 5 | PTGDS_NK |
| 1302 | 8.73E-22 | 0.41501796 | 0.188 | 0.065 | 1.90E-17    | RP11-81H14.2 | 5 | PTGDS_NK |
| 1303 | 3.70E-13 | 0.41359614 | 0.308 | 0.183 | 8.08E-09    | SH3BP5       | 5 | PTGDS_NK |
| 1304 | 1.29E-15 | 0.41323664 | 0.584 | 0.454 | 2.82E-11    | CD47         | 5 | PTGDS_NK |
| 1305 | 1.57E-15 | 0.41257678 | 0.584 | 0.458 | 3.41E-11    | BIN2         | 5 | PTGDS_NK |
| 1306 | 5.82E-45 | 0.4082978  | 0.12  | 0.016 | 1.27E-40    | SIGLEC7      | 5 | PTGDS_NK |
| 1307 | 3.61E-14 | 0.40800108 | 0.441 | 0.302 | 7.88E-10    | SAMHD1       | 5 | PTGDS_NK |
| 1308 | 4.25E-18 | 0.40483977 | 0.294 | 0.147 | 9.28E-14    | LYN          | 5 | PTGDS_NK |
| 1309 | 1.22E-12 | 0.40437606 | 0.308 | 0.185 | 2.65E-08    | PTPRE        | 5 | PTGDS_NK |
| 1310 | 1.46E-19 | 0.40341183 | 0.206 | 0.082 | 3.18E-15    | SLC15A4      | 5 | PTGDS_NK |
| 1311 | 6.79E-16 | 0.40084477 | 0.482 | 0.326 | 1.48E-11    | IL2RB        | 5 | PTGDS_NK |
| 1312 | 2.28E-16 | 0.3981822  | 0.251 | 0.123 | 4.97E-12    | RIN3         | 5 | PTGDS_NK |
| 1313 | 2.18E-22 | 0.39436302 | 0.213 | 0.079 | 4.75E-18    | OSBPL5       | 5 | PTGDS_NK |
| 1314 | 5.95E-12 | 0.39396015 | 0.477 | 0.359 | 1.30E-07    | SLA          | 5 | PTGDS_NK |
| 1315 | 1.02E-16 | 0.39278951 | 0.283 | 0.144 | 2.22E-12    | CD300A       | 5 | PTGDS_NK |
| 1316 | 1.15E-15 | 0.3914187  | 0.529 | 0.381 | 2.50E-11    | MBP          | 5 | PTGDS_NK |
| 1317 | 2.27E-12 | 0.39102837 | 0.452 | 0.322 | 4.95E-08    | MATK         | 5 | PTGDS_NK |
| 1318 | 3.61E-33 | 0.3906304  | 0.127 | 0.024 | 7.86E-29    | GRASP        | 5 | PTGDS_NK |
| 1319 | 2.55E-11 | 0.38910639 | 0.391 | 0.271 | 5.56E-07    | CHST12       | 5 | PTGDS_NK |
| 1320 | 5.41E-17 | 0.388446   | 0.204 | 0.086 | 1.18E-12    | GK5          | 5 | PTGDS_NK |
| 1321 | 1.91E-16 | 0.38235465 | 0.133 | 0.045 | 4.17E-12    | GSTM2        | 5 | PTGDS_NK |
| 1322 | 5.50E-19 | 0.38224825 | 0.502 | 0.295 | 1.20E-14    | XCL2         | 5 | PTGDS_NK |
| 1323 | 5.34E-14 | 0.38162558 | 0.425 | 0.282 | 1.16E-09    | TPST2        | 5 | PTGDS_NK |
| 1324 | 3.33E-21 | 0.38160782 | 0.923 | 0.815 | 7.26E-17    | DDIT4        | 5 | PTGDS_NK |
| 1325 | 3.22E-27 | 0.38014267 | 0.154 | 0.04  | 7.01E-23    | MLC1         | 5 | PTGDS_NK |
| 1326 | 3.20E-17 | 0.37848602 | 0.17  | 0.065 | 6.98E-13    | THEMIS2      | 5 | PTGDS_NK |
| 1327 | 1.24E-14 | 0.37516248 | 0.29  | 0.158 | 2.71E-10    | GLIPR2       | 5 | PTGDS_NK |
| 1328 | 7.17E-21 | 0.37471117 | 0.808 | 0.725 | 1.56E-16    | IL2RG        | 5 | PTGDS_NK |

|      |          |            |       |       |             |            |   |          |
|------|----------|------------|-------|-------|-------------|------------|---|----------|
| 1329 | 1.56E-09 | 0.37063781 | 0.514 | 0.391 | 3.41E-05    | CREM       | 5 | PTGDS_NK |
| 1330 | 2.49E-14 | 0.36915276 | 0.867 | 0.82  | 5.42E-10    | TXNIP      | 5 | PTGDS_NK |
| 1331 | 9.01E-15 | 0.36823214 | 0.231 | 0.111 | 1.97E-10    | MTSS1      | 5 | PTGDS_NK |
| 1332 | 5.81E-12 | 0.3672348  | 0.382 | 0.259 | 1.27E-07    | SSH2       | 5 | PTGDS_NK |
| 1333 | 3.89E-58 | 0.36393758 | 0.118 | 0.011 | 8.49E-54    | FES        | 5 | PTGDS_NK |
| 1334 | 3.69E-13 | 0.3638066  | 0.548 | 0.421 | 8.04E-09    | AES        | 5 | PTGDS_NK |
| 1335 | 6.06E-12 | 0.36357717 | 0.321 | 0.196 | 1.32E-07    | RASA3      | 5 | PTGDS_NK |
| 1336 | 1.04E-11 | 0.36082525 | 0.19  | 0.096 | 2.27E-07    | HIPK2      | 5 | PTGDS_NK |
| 1337 | 8.64E-11 | 0.36038492 | 0.527 | 0.412 | 1.88E-06    | PYHIN1     | 5 | PTGDS_NK |
| 1338 | 4.53E-09 | 0.35909976 | 0.269 | 0.173 | 9.87E-05    | TMBIM1     | 5 | PTGDS_NK |
| 1339 | 3.42E-14 | 0.35789169 | 0.581 | 0.456 | 7.47E-10    | CD164      | 5 | PTGDS_NK |
| 1340 | 2.55E-10 | 0.35660982 | 0.425 | 0.321 | 5.56E-06    | CDC42SE1   | 5 | PTGDS_NK |
| 1341 | 2.99E-12 | 0.35529537 | 0.326 | 0.202 | 6.52E-08    | ADAM8      | 5 | PTGDS_NK |
| 1342 | 6.90E-09 | 0.35458346 | 0.371 | 0.277 | 0.000150457 | PTPN2      | 5 | PTGDS_NK |
| 1343 | 4.37E-07 | 0.35106867 | 0.26  | 0.177 | 0.009527824 | CDKN2D     | 5 | PTGDS_NK |
| 1344 | 1.35E-12 | 0.34935232 | 0.631 | 0.51  | 2.95E-08    | HOPX       | 5 | PTGDS_NK |
| 1345 | 2.23E-11 | 0.34926885 | 0.48  | 0.362 | 4.85E-07    | PSAP       | 5 | PTGDS_NK |
| 1346 | 3.24E-07 | 0.34902128 | 0.362 | 0.281 | 0.007076631 | SDF4       | 5 | PTGDS_NK |
| 1347 | 4.88E-17 | 0.34834414 | 0.118 | 0.036 | 1.06E-12    | CXCR2      | 5 | PTGDS_NK |
| 1348 | 2.72E-20 | 0.34813303 | 0.955 | 0.914 | 5.92E-16    | IER2       | 5 | PTGDS_NK |
| 1349 | 2.35E-07 | 0.34781941 | 0.414 | 0.336 | 0.005118525 | PSMB10     | 5 | PTGDS_NK |
| 1350 | 1.58E-12 | 0.34727257 | 0.459 | 0.316 | 3.45E-08    | KLF2       | 5 | PTGDS_NK |
| 1351 | 4.77E-13 | 0.34484216 | 0.455 | 0.318 | 1.04E-08    | CARD16     | 5 | PTGDS_NK |
| 1352 | 2.49E-10 | 0.34181411 | 0.188 | 0.099 | 5.44E-06    | B4GALT4    | 5 | PTGDS_NK |
| 1353 | 3.98E-14 | 0.33961751 | 0.133 | 0.049 | 8.67E-10    | GPR141     | 5 | PTGDS_NK |
| 1354 | 1.39E-10 | 0.33866708 | 0.179 | 0.091 | 3.04E-06    | SERPINB6   | 5 | PTGDS_NK |
| 1355 | 2.78E-10 | 0.33793885 | 0.251 | 0.147 | 6.06E-06    | KLF3       | 5 | PTGDS_NK |
| 1356 | 3.23E-27 | 0.3376788  | 0.133 | 0.031 | 7.04E-23    | IRS2       | 5 | PTGDS_NK |
| 1357 | 5.62E-12 | 0.33684321 | 0.267 | 0.151 | 1.22E-07    | CEBPD      | 5 | PTGDS_NK |
| 1358 | 3.07E-09 | 0.33557955 | 0.432 | 0.327 | 6.70E-05    | RHOC       | 5 | PTGDS_NK |
| 1359 | 1.01E-09 | 0.33480052 | 0.269 | 0.166 | 2.20E-05    | SLA2       | 5 | PTGDS_NK |
| 1360 | 2.35E-08 | 0.33280037 | 0.572 | 0.491 | 0.000513358 | IRF1       | 5 | PTGDS_NK |
| 1361 | 8.90E-11 | 0.33213807 | 0.579 | 0.486 | 1.94E-06    | MSN        | 5 | PTGDS_NK |
| 1362 | 3.80E-19 | 0.32858706 | 0.109 | 0.029 | 8.29E-15    | LINC00299  | 5 | PTGDS_NK |
| 1363 | 6.92E-08 | 0.32765258 | 0.545 | 0.457 | 0.001509745 | PRDM1      | 5 | PTGDS_NK |
| 1364 | 9.26E-11 | 0.32722666 | 0.226 | 0.126 | 2.02E-06    | TFDP2      | 5 | PTGDS_NK |
| 1365 | 4.98E-10 | 0.32400062 | 0.638 | 0.581 | 1.09E-05    | EIF3G      | 5 | PTGDS_NK |
| 1366 | 4.86E-10 | 0.32345761 | 0.167 | 0.083 | 1.06E-05    | CLASP1     | 5 | PTGDS_NK |
| 1367 | 2.34E-14 | 0.32344999 | 0.133 | 0.05  | 5.10E-10    | CXXC5      | 5 | PTGDS_NK |
| 1368 | 1.21E-10 | 0.32275117 | 0.19  | 0.098 | 2.64E-06    | PLEKHA1    | 5 | PTGDS_NK |
| 1369 | 6.43E-14 | 0.32206574 | 0.661 | 0.5   | 1.40E-09    | TRBC1      | 5 | PTGDS_NK |
| 1370 | 1.50E-18 | 0.31978798 | 0.783 | 0.661 | 3.27E-14    | CCND3      | 5 | PTGDS_NK |
| 1371 | 5.67E-09 | 0.31880918 | 0.29  | 0.191 | 0.000123659 | TBX21      | 5 | PTGDS_NK |
| 1372 | 6.86E-15 | 0.31692497 | 0.238 | 0.114 | 1.50E-10    | LAT2       | 5 | PTGDS_NK |
| 1373 | 5.02E-07 | 0.31456973 | 0.235 | 0.155 | 0.010943021 | ADD1       | 5 | PTGDS_NK |
| 1374 | 9.02E-07 | 0.31209475 | 0.188 | 0.116 | 0.019667961 | DHRS3      | 5 | PTGDS_NK |
| 1375 | 1.35E-06 | 0.31191826 | 0.238 | 0.158 | 0.029345345 | ICAM1      | 5 | PTGDS_NK |
| 1376 | 1.75E-06 | 0.31189419 | 0.346 | 0.263 | 0.038261819 | IQGAP2     | 5 | PTGDS_NK |
| 1377 | 2.78E-08 | 0.3102605  | 0.455 | 0.354 | 0.000607001 | FLNA       | 5 | PTGDS_NK |
| 1378 | 2.29E-11 | 0.30984936 | 0.158 | 0.073 | 5.00E-07    | FHL3       | 5 | PTGDS_NK |
| 1379 | 2.66E-08 | 0.3092562  | 0.407 | 0.308 | 0.00057913  | PPP3CC     | 5 | PTGDS_NK |
| 1380 | 6.06E-10 | 0.30516111 | 0.624 | 0.537 | 1.32E-05    | PDIA3      | 5 | PTGDS_NK |
| 1381 | 3.06E-08 | 0.30489669 | 0.181 | 0.103 | 0.000666986 | SCLT1      | 5 | PTGDS_NK |
| 1382 | 5.30E-13 | 0.30320335 | 0.649 | 0.531 | 1.16E-08    | GSTP1      | 5 | PTGDS_NK |
| 1383 | 1.30E-06 | 0.30248226 | 0.498 | 0.419 | 0.028320933 | MAPRE2     | 5 | PTGDS_NK |
| 1384 | 2.54E-07 | 0.30174562 | 0.568 | 0.512 | 0.005548635 | SRSF2      | 5 | PTGDS_NK |
| 1385 | 5.39E-35 | 0.30095599 | 0.998 | 0.989 | 1.17E-30    | HLA-C      | 5 | PTGDS_NK |
| 1386 | 2.73E-16 | 0.29966337 | 0.751 | 0.653 | 5.94E-12    | CD53       | 5 | PTGDS_NK |
| 1387 | 2.74E-08 | 0.29923093 | 0.301 | 0.202 | 0.000597855 | GPATCH8    | 5 | PTGDS_NK |
| 1388 | 2.48E-11 | 0.29917824 | 0.115 | 0.045 | 5.40E-07    | MIR181A1HG | 5 | PTGDS_NK |
| 1389 | 1.41E-09 | 0.29897015 | 0.292 | 0.185 | 3.08E-05    | STK38      | 5 | PTGDS_NK |
| 1390 | 7.41E-07 | 0.29696597 | 0.568 | 0.498 | 0.016155032 | PTGER4     | 5 | PTGDS_NK |
| 1391 | 3.86E-07 | 0.29680393 | 0.477 | 0.405 | 0.00841463  | DENND2D    | 5 | PTGDS_NK |
| 1392 | 6.98E-08 | 0.29601233 | 0.344 | 0.245 | 0.001521315 | SYNE1      | 5 | PTGDS_NK |
| 1393 | 1.16E-13 | 0.29588019 | 0.871 | 0.815 | 2.52E-09    | UBB        | 5 | PTGDS_NK |
| 1394 | 1.36E-12 | 0.29494529 | 0.138 | 0.056 | 2.97E-08    | CTBP2      | 5 | PTGDS_NK |
| 1395 | 2.18E-09 | 0.29353271 | 0.19  | 0.103 | 4.74E-05    | TLE1       | 5 | PTGDS_NK |
| 1396 | 8.62E-07 | 0.29323833 | 0.367 | 0.284 | 0.01879227  | PRKAR1A    | 5 | PTGDS_NK |
| 1397 | 3.80E-07 | 0.29321433 | 0.414 | 0.327 | 0.008284795 | ADD3       | 5 | PTGDS_NK |
| 1398 | 1.01E-18 | 0.29124812 | 0.111 | 0.03  | 2.21E-14    | AK5        | 5 | PTGDS_NK |

|      |          |             |       |       |             |          |   |          |
|------|----------|-------------|-------|-------|-------------|----------|---|----------|
| 1399 | 4.02E-09 | 0.29096803  | 0.654 | 0.589 | 8.76E-05    | ISG20    | 5 | PTGDS_NK |
| 1400 | 6.89E-07 | 0.28940535  | 0.434 | 0.348 | 0.015031606 | ATM      | 5 | PTGDS_NK |
| 1401 | 2.46E-09 | 0.28923022  | 0.158 | 0.08  | 5.37E-05    | UNC119   | 5 | PTGDS_NK |
| 1402 | 1.35E-21 | 0.28881662  | 0.894 | 0.805 | 2.94E-17    | ARPC2    | 5 | PTGDS_NK |
| 1403 | 5.45E-07 | 0.28837968  | 0.176 | 0.105 | 0.011885579 | IGF2R    | 5 | PTGDS_NK |
| 1404 | 3.14E-07 | 0.28566754  | 0.299 | 0.206 | 0.006849543 | PTGDR    | 5 | PTGDS_NK |
| 1405 | 1.80E-09 | 0.28542582  | 0.486 | 0.37  | 3.93E-05    | UCP2     | 5 | PTGDS_NK |
| 1406 | 7.34E-07 | 0.28472388  | 0.215 | 0.137 | 0.016004607 | MVD      | 5 | PTGDS_NK |
| 1407 | 6.70E-07 | 0.27975602  | 0.511 | 0.443 | 0.014620647 | ARHGEF1  | 5 | PTGDS_NK |
| 1408 | 1.08E-07 | 0.27818425  | 0.133 | 0.068 | 0.002360146 | SELL     | 5 | PTGDS_NK |
| 1409 | 5.23E-12 | 0.27703094  | 0.708 | 0.596 | 1.14E-07    | EMP3     | 5 | PTGDS_NK |
| 1410 | 5.16E-07 | 0.27510942  | 0.269 | 0.185 | 0.0112553   | SORL1    | 5 | PTGDS_NK |
| 1411 | 3.77E-08 | 0.27482073  | 0.566 | 0.494 | 0.000821926 | FAM49B   | 5 | PTGDS_NK |
| 1412 | 1.04E-11 | 0.27272948  | 0.118 | 0.046 | 2.27E-07    | TMED1    | 5 | PTGDS_NK |
| 1413 | 3.75E-07 | 0.27087838  | 0.509 | 0.434 | 0.008176194 | DHRS7    | 5 | PTGDS_NK |
| 1414 | 1.51E-30 | 0.27081956  | 0.93  | 0.583 | 3.30E-26    | KLRB1    | 5 | PTGDS_NK |
| 1415 | 2.79E-11 | 0.27075447  | 0.844 | 0.778 | 6.09E-07    | PNRC1    | 5 | PTGDS_NK |
| 1416 | 2.61E-07 | 0.27040337  | 0.149 | 0.082 | 0.005701716 | APLP2    | 5 | PTGDS_NK |
| 1417 | 5.28E-08 | 0.270025    | 0.271 | 0.177 | 0.001150989 | G6PD     | 5 | PTGDS_NK |
| 1418 | 1.71E-06 | 0.26804137  | 0.774 | 0.735 | 0.037308186 | ZFP36L1  | 5 | PTGDS_NK |
| 1419 | 4.51E-11 | 0.26691124  | 0.152 | 0.068 | 9.85E-07    | PDGFD    | 5 | PTGDS_NK |
| 1420 | 8.39E-12 | 0.26680855  | 0.767 | 0.68  | 1.83E-07    | CIRBP    | 5 | PTGDS_NK |
| 1421 | 6.69E-07 | 0.26485562  | 0.167 | 0.098 | 0.014584345 | CD226    | 5 | PTGDS_NK |
| 1422 | 1.63E-06 | 0.26484036  | 0.319 | 0.236 | 0.035577589 | SLC44A2  | 5 | PTGDS_NK |
| 1423 | 7.53E-07 | 0.2641982   | 0.466 | 0.378 | 0.016417089 | FCMR     | 5 | PTGDS_NK |
| 1424 | 6.43E-29 | 0.26402371  | 0.998 | 0.997 | 1.40E-24    | HLA-B    | 5 | PTGDS_NK |
| 1425 | 2.25E-07 | 0.26166634  | 0.71  | 0.639 | 0.004908656 | PPP1R15A | 5 | PTGDS_NK |
| 1426 | 1.51E-06 | 0.26160492  | 0.127 | 0.068 | 0.032931023 | BPGM     | 5 | PTGDS_NK |
| 1427 | 4.60E-07 | 0.26036932  | 0.17  | 0.098 | 0.010037752 | S1PR1    | 5 | PTGDS_NK |
| 1428 | 5.53E-08 | 0.25787128  | 0.147 | 0.076 | 0.001205048 | PAM      | 5 | PTGDS_NK |
| 1429 | 7.70E-07 | 0.25766026  | 0.348 | 0.259 | 0.016787287 | TNFRSF14 | 5 | PTGDS_NK |
| 1430 | 5.30E-41 | 0.25708959  | 1     | 1     | 1.16E-36    | B2M      | 5 | PTGDS_NK |
| 1431 | 8.37E-15 | 0.25533137  | 0.982 | 0.968 | 1.83E-10    | FTL      | 5 | PTGDS_NK |
| 1432 | 1.03E-07 | 0.25497694  | 0.149 | 0.08  | 0.002239495 | AGK      | 5 | PTGDS_NK |
| 1433 | 2.72E-08 | 0.25076881  | 0.629 | 0.535 | 0.00059406  | GPR65    | 5 | PTGDS_NK |
| 1434 | 4.04E-07 | -0.25093441 | 0.154 | 0.269 | 0.008807357 | CASP1    | 5 | PTGDS_NK |
| 1435 | 8.62E-11 | -0.25151824 | 0.76  | 0.9   | 1.88E-06    | CXCR4    | 5 | PTGDS_NK |
| 1436 | 5.45E-11 | -0.25186791 | 0.661 | 0.796 | 1.19E-06    | RPL27A   | 5 | PTGDS_NK |
| 1437 | 4.37E-15 | -0.2529209  | 0.853 | 0.933 | 9.52E-11    | ATP5E    | 5 | PTGDS_NK |
| 1438 | 3.79E-08 | -0.2548726  | 0.527 | 0.654 | 0.000826439 | C12orf57 | 5 | PTGDS_NK |
| 1439 | 1.72E-08 | -0.25489817 | 0.192 | 0.334 | 0.000374327 | ZBTB38   | 5 | PTGDS_NK |
| 1440 | 7.90E-08 | -0.25520101 | 0.369 | 0.514 | 0.001722228 | EIF3H    | 5 | PTGDS_NK |
| 1441 | 3.05E-07 | -0.25520591 | 0.441 | 0.576 | 0.006642388 | FYB      | 5 | PTGDS_NK |
| 1442 | 8.36E-26 | -0.25752239 | 0.982 | 0.99  | 1.82E-21    | RPL18    | 5 | PTGDS_NK |
| 1443 | 3.70E-07 | -0.25856398 | 0.206 | 0.328 | 0.008074494 | ELOVL5   | 5 | PTGDS_NK |
| 1444 | 1.51E-24 | -0.25876172 | 0.95  | 0.981 | 3.30E-20    | RPL23A   | 5 | PTGDS_NK |
| 1445 | 2.36E-22 | -0.2630231  | 0.959 | 0.979 | 5.16E-18    | RPL17    | 5 | PTGDS_NK |
| 1446 | 2.45E-17 | -0.26352693 | 0.871 | 0.933 | 5.34E-13    | RPS9     | 5 | PTGDS_NK |
| 1447 | 5.00E-16 | -0.26558647 | 0.928 | 0.964 | 1.09E-11    | RPS29    | 5 | PTGDS_NK |
| 1448 | 3.56E-20 | -0.26644087 | 0.916 | 0.956 | 7.77E-16    | RPL35    | 5 | PTGDS_NK |
| 1449 | 4.71E-08 | -0.26902622 | 0.326 | 0.472 | 0.001027619 | ERP29    | 5 | PTGDS_NK |
| 1450 | 3.95E-35 | -0.2716524  | 0.986 | 0.994 | 8.62E-31    | RPL26    | 5 | PTGDS_NK |
| 1451 | 7.47E-24 | -0.27213108 | 0.973 | 0.988 | 1.63E-19    | RPL12    | 5 | PTGDS_NK |
| 1452 | 1.22E-18 | -0.27231686 | 0.925 | 0.952 | 2.66E-14    | RPS5     | 5 | PTGDS_NK |
| 1453 | 1.35E-06 | -0.27464557 | 0.17  | 0.278 | 0.02952816  | NUCB2    | 5 | PTGDS_NK |
| 1454 | 1.15E-07 | -0.27609262 | 0.38  | 0.528 | 0.002501232 | PARP8    | 5 | PTGDS_NK |
| 1455 | 7.95E-21 | -0.27648813 | 0.93  | 0.961 | 1.73E-16    | RPL10A   | 5 | PTGDS_NK |
| 1456 | 2.23E-08 | -0.2781582  | 0.554 | 0.698 | 0.000485813 | SRSF7    | 5 | PTGDS_NK |
| 1457 | 3.39E-30 | -0.28044357 | 0.982 | 0.986 | 7.39E-26    | RPS10    | 5 | PTGDS_NK |
| 1458 | 1.27E-07 | -0.28148923 | 0.862 | 0.889 | 0.002770538 | DUSP1    | 5 | PTGDS_NK |
| 1459 | 2.36E-09 | -0.28265075 | 0.229 | 0.387 | 5.15E-05    | PRDX1    | 5 | PTGDS_NK |
| 1460 | 2.97E-10 | -0.2843019  | 0.303 | 0.474 | 6.49E-06    | MYH9     | 5 | PTGDS_NK |
| 1461 | 1.97E-07 | -0.28619278 | 0.219 | 0.353 | 0.004290729 | ITM2A    | 5 | PTGDS_NK |
| 1462 | 2.75E-33 | -0.28767695 | 0.982 | 0.993 | 6.00E-29    | RPS23    | 5 | PTGDS_NK |
| 1463 | 1.22E-10 | -0.28847485 | 0.249 | 0.424 | 2.65E-06    | PKM      | 5 | PTGDS_NK |
| 1464 | 3.04E-16 | -0.28859157 | 0.783 | 0.915 | 6.63E-12    | MT-ND2   | 5 | PTGDS_NK |
| 1465 | 2.76E-07 | -0.28915332 | 0.45  | 0.571 | 0.006009901 | HERPUD1  | 5 | PTGDS_NK |
| 1466 | 2.72E-09 | -0.29233851 | 0.208 | 0.358 | 5.94E-05    | AKIRIN2  | 5 | PTGDS_NK |
| 1467 | 4.56E-09 | -0.29255044 | 0.29  | 0.44  | 9.94E-05    | CKLF     | 5 | PTGDS_NK |
| 1468 | 1.14E-35 | -0.29263095 | 0.991 | 0.991 | 2.50E-31    | RPS7     | 5 | PTGDS_NK |

|      |          |             |       |       |             |          |   |          |
|------|----------|-------------|-------|-------|-------------|----------|---|----------|
| 1469 | 1.14E-06 | -0.29443287 | 0.167 | 0.279 | 0.024792463 | AIM1     | 5 | PTGDS_NK |
| 1470 | 1.85E-09 | -0.29746118 | 0.138 | 0.276 | 4.03E-05    | MZT2A    | 5 | PTGDS_NK |
| 1471 | 9.91E-40 | -0.30119484 | 0.991 | 0.995 | 2.16E-35    | RPL19    | 5 | PTGDS_NK |
| 1472 | 8.37E-09 | -0.3013194  | 0.308 | 0.462 | 0.00018254  | CD96     | 5 | PTGDS_NK |
| 1473 | 5.26E-39 | -0.30150077 | 0.984 | 0.995 | 1.15E-34    | RPS15    | 5 | PTGDS_NK |
| 1474 | 5.53E-34 | -0.30243154 | 0.989 | 0.991 | 1.21E-29    | RPL18A   | 5 | PTGDS_NK |
| 1475 | 1.99E-29 | -0.30333043 | 0.955 | 0.986 | 4.35E-25    | RPS6     | 5 | PTGDS_NK |
| 1476 | 2.56E-09 | -0.30475125 | 0.149 | 0.289 | 5.58E-05    | ATP1A1   | 5 | PTGDS_NK |
| 1477 | 2.25E-48 | -0.30495205 | 1     | 0.998 | 4.92E-44    | RPS15A   | 5 | PTGDS_NK |
| 1478 | 4.21E-07 | -0.30542515 | 0.122 | 0.229 | 0.009182809 | BCL2A1   | 5 | PTGDS_NK |
| 1479 | 1.08E-37 | -0.30562874 | 0.995 | 0.995 | 2.36E-33    | RPS28    | 5 | PTGDS_NK |
| 1480 | 1.03E-08 | -0.30794546 | 0.606 | 0.725 | 0.000224124 | CALM2    | 5 | PTGDS_NK |
| 1481 | 1.34E-10 | -0.30820444 | 0.147 | 0.302 | 2.93E-06    | SNHG12   | 5 | PTGDS_NK |
| 1482 | 2.27E-11 | -0.3083189  | 0.52  | 0.674 | 4.95E-07    | CRIP1    | 5 | PTGDS_NK |
| 1483 | 3.20E-09 | -0.31080558 | 0.188 | 0.331 | 6.97E-05    | TXN      | 5 | PTGDS_NK |
| 1484 | 1.35E-22 | -0.31154705 | 0.921 | 0.958 | 2.95E-18    | RPS2     | 5 | PTGDS_NK |
| 1485 | 1.15E-10 | -0.31201991 | 0.17  | 0.327 | 2.50E-06    | TNFAIP8  | 5 | PTGDS_NK |
| 1486 | 8.59E-10 | -0.31511789 | 0.233 | 0.384 | 1.87E-05    | LAT      | 5 | PTGDS_NK |
| 1487 | 8.97E-38 | -0.31853988 | 0.982 | 0.988 | 1.96E-33    | RPS4X    | 5 | PTGDS_NK |
| 1488 | 1.11E-34 | -0.31919568 | 0.991 | 0.989 | 2.41E-30    | RPS13    | 5 | PTGDS_NK |
| 1489 | 1.12E-18 | -0.31972331 | 0.792 | 0.916 | 2.44E-14    | CCL5     | 5 | PTGDS_NK |
| 1490 | 2.45E-12 | -0.3231493  | 0.572 | 0.714 | 5.35E-08    | S100A10  | 5 | PTGDS_NK |
| 1491 | 2.74E-18 | -0.32400188 | 0.769 | 0.876 | 5.99E-14    | EEF1B2   | 5 | PTGDS_NK |
| 1492 | 1.49E-10 | -0.32493329 | 0.215 | 0.378 | 3.24E-06    | SPOCK2   | 5 | PTGDS_NK |
| 1493 | 1.42E-10 | -0.32714803 | 0.102 | 0.237 | 3.10E-06    | OCIAD2   | 5 | PTGDS_NK |
| 1494 | 3.72E-08 | -0.32865785 | 0.17  | 0.297 | 0.000811757 | FAM46C   | 5 | PTGDS_NK |
| 1495 | 1.60E-09 | -0.33106567 | 0.274 | 0.426 | 3.49E-05    | SNHG8    | 5 | PTGDS_NK |
| 1496 | 2.27E-33 | -0.33119635 | 0.943 | 0.974 | 4.95E-29    | RPS16    | 5 | PTGDS_NK |
| 1497 | 1.11E-41 | -0.33262143 | 0.998 | 0.997 | 2.41E-37    | RPL34    | 5 | PTGDS_NK |
| 1498 | 1.78E-43 | -0.33393365 | 0.995 | 0.997 | 3.87E-39    | RPL13    | 5 | PTGDS_NK |
| 1499 | 4.22E-41 | -0.33483933 | 0.977 | 0.99  | 9.20E-37    | RPL35A   | 5 | PTGDS_NK |
| 1500 | 4.67E-41 | -0.33706688 | 0.998 | 0.997 | 1.02E-36    | RPS27    | 5 | PTGDS_NK |
| 1501 | 5.78E-11 | -0.33800808 | 0.335 | 0.511 | 1.26E-06    | TERF2IP  | 5 | PTGDS_NK |
| 1502 | 5.48E-45 | -0.33844842 | 1     | 0.999 | 1.20E-40    | RPLP1    | 5 | PTGDS_NK |
| 1503 | 1.21E-42 | -0.34055389 | 0.977 | 0.993 | 2.64E-38    | RPLP2    | 5 | PTGDS_NK |
| 1504 | 8.65E-24 | -0.34099143 | 0.887 | 0.953 | 1.89E-19    | MT-ND1   | 5 | PTGDS_NK |
| 1505 | 1.14E-31 | -0.34173392 | 0.928 | 0.975 | 2.49E-27    | RPL8     | 5 | PTGDS_NK |
| 1506 | 7.25E-48 | -0.34447831 | 0.989 | 0.996 | 1.58E-43    | RPL11    | 5 | PTGDS_NK |
| 1507 | 2.32E-09 | -0.34677918 | 0.1   | 0.224 | 5.05E-05    | TOB1     | 5 | PTGDS_NK |
| 1508 | 9.70E-11 | -0.34709897 | 0.167 | 0.324 | 2.12E-06    | G3BP2    | 5 | PTGDS_NK |
| 1509 | 1.50E-55 | -0.34965148 | 0.989 | 0.995 | 3.26E-51    | RPS3     | 5 | PTGDS_NK |
| 1510 | 6.03E-08 | -0.3538165  | 0.186 | 0.322 | 0.001314162 | HSPB1    | 5 | PTGDS_NK |
| 1511 | 2.09E-33 | -0.35510082 | 0.946 | 0.979 | 4.56E-29    | RPL36    | 5 | PTGDS_NK |
| 1512 | 3.54E-07 | -0.35893488 | 0.271 | 0.399 | 0.007712285 | HBB      | 5 | PTGDS_NK |
| 1513 | 1.12E-07 | -0.36029522 | 0.405 | 0.542 | 0.002440113 | FOSB     | 5 | PTGDS_NK |
| 1514 | 2.44E-48 | -0.36171746 | 0.986 | 0.993 | 5.31E-44    | RPS14    | 5 | PTGDS_NK |
| 1515 | 5.15E-58 | -0.37276685 | 0.991 | 0.996 | 1.12E-53    | RPL30    | 5 | PTGDS_NK |
| 1516 | 7.93E-18 | -0.37980671 | 0.568 | 0.75  | 1.73E-13    | RPS20    | 5 | PTGDS_NK |
| 1517 | 1.90E-12 | -0.38116364 | 0.269 | 0.448 | 4.14E-08    | PDCD4    | 5 | PTGDS_NK |
| 1518 | 9.88E-20 | -0.38321796 | 0.624 | 0.802 | 2.15E-15    | RPL36A   | 5 | PTGDS_NK |
| 1519 | 3.81E-55 | -0.38556904 | 0.991 | 0.996 | 8.30E-51    | RPS8     | 5 | PTGDS_NK |
| 1520 | 1.18E-11 | -0.38594315 | 0.19  | 0.354 | 2.57E-07    | HLA-DQB1 | 5 | PTGDS_NK |
| 1521 | 4.15E-43 | -0.38649553 | 0.977 | 0.99  | 9.05E-39    | RPS18    | 5 | PTGDS_NK |
| 1522 | 1.49E-59 | -0.39383798 | 1     | 0.997 | 3.25E-55    | RPL39    | 5 | PTGDS_NK |
| 1523 | 4.32E-44 | -0.39421775 | 0.971 | 0.987 | 9.43E-40    | RPS25    | 5 | PTGDS_NK |
| 1524 | 2.85E-61 | -0.39882471 | 0.989 | 0.995 | 6.21E-57    | RPL32    | 5 | PTGDS_NK |
| 1525 | 2.29E-11 | -0.40007917 | 0.197 | 0.359 | 4.99E-07    | SAMSN1   | 5 | PTGDS_NK |
| 1526 | 1.01E-11 | -0.40596579 | 0.294 | 0.459 | 2.21E-07    | HLA-DPB1 | 5 | PTGDS_NK |
| 1527 | 3.75E-14 | -0.40983862 | 0.265 | 0.458 | 8.18E-10    | HLA-DPA1 | 5 | PTGDS_NK |
| 1528 | 7.35E-15 | -0.41191654 | 0.324 | 0.521 | 1.60E-10    | LDHB     | 5 | PTGDS_NK |
| 1529 | 3.82E-15 | -0.41434066 | 0.17  | 0.366 | 8.33E-11    | EML4     | 5 | PTGDS_NK |
| 1530 | 1.74E-51 | -0.4222376  | 0.968 | 0.988 | 3.80E-47    | RPS21    | 5 | PTGDS_NK |
| 1531 | 1.42E-81 | -0.43007871 | 0.995 | 0.999 | 3.09E-77    | RPL28    | 5 | PTGDS_NK |
| 1532 | 1.40E-16 | -0.43138915 | 0.224 | 0.441 | 3.05E-12    | TUBA4A   | 5 | PTGDS_NK |
| 1533 | 3.99E-39 | -0.44228319 | 0.916 | 0.968 | 8.70E-35    | RPLP0    | 5 | PTGDS_NK |
| 1534 | 2.11E-17 | -0.4580862  | 0.12  | 0.317 | 4.61E-13    | LIME1    | 5 | PTGDS_NK |
| 1535 | 1.03E-06 | -0.47548528 | 0.154 | 0.261 | 0.02236473  | HSPH1    | 5 | PTGDS_NK |
| 1536 | 1.55E-61 | -0.47939235 | 0.993 | 0.998 | 3.38E-57    | RPS19    | 5 | PTGDS_NK |
| 1537 | 1.12E-11 | -0.4801905  | 0.183 | 0.34  | 2.45E-07    | KLRG1    | 5 | PTGDS_NK |
| 1538 | 3.62E-08 | -0.48926626 | 0.369 | 0.51  | 0.00079023  | HSPE1    | 5 | PTGDS_NK |

|      |           |             |       |       |             |               |   |                |
|------|-----------|-------------|-------|-------|-------------|---------------|---|----------------|
| 1539 | 3.21E-15  | -0.49941416 | 0.238 | 0.428 | 7.00E-11    | EZR           | 5 | PTGDS_NK       |
| 1540 | 2.94E-84  | -0.50341521 | 0.998 | 0.997 | 6.41E-80    | RPS12         | 5 | PTGDS_NK       |
| 1541 | 1.52E-20  | -0.51186171 | 0.197 | 0.44  | 3.31E-16    | CD44          | 5 | PTGDS_NK       |
| 1542 | 1.83E-33  | -0.51278409 | 0.552 | 0.793 | 3.99E-29    | PPDPF         | 5 | PTGDS_NK       |
| 1543 | 3.79E-23  | -0.54190329 | 0.208 | 0.466 | 8.27E-19    | CNN2          | 5 | PTGDS_NK       |
| 1544 | 1.23E-08  | -0.55664811 | 0.249 | 0.37  | 0.000268576 | RGS1          | 5 | PTGDS_NK       |
| 1545 | 7.75E-34  | -0.56056032 | 0.618 | 0.808 | 1.69E-29    | S100A6        | 5 | PTGDS_NK       |
| 1546 | 5.84E-08  | -0.5773232  | 0.258 | 0.393 | 0.00127381  | HSPD1         | 5 | PTGDS_NK       |
| 1547 | 2.16E-24  | -0.58036685 | 0.19  | 0.442 | 4.72E-20    | TC2N          | 5 | PTGDS_NK       |
| 1548 | 8.43E-23  | -0.61230005 | 0.326 | 0.55  | 1.84E-18    | HLA-DRB1      | 5 | PTGDS_NK       |
| 1549 | 2.73E-11  | -0.7524373  | 0.206 | 0.352 | 5.94E-07    | HMGB2         | 5 | PTGDS_NK       |
| 1550 | 2.26E-25  | -0.87575775 | 0.188 | 0.443 | 4.93E-21    | TNF           | 5 | PTGDS_NK       |
| 1551 | 4.65E-63  | -0.91737755 | 0.554 | 0.845 | 1.01E-58    | VIM           | 5 | PTGDS_NK       |
| 1552 | 8.95E-100 | -1.02086773 | 0.385 | 0.908 | 1.95E-95    | IL32          | 5 | PTGDS_NK       |
| 1553 | 2.96E-74  | -1.06041504 | 0.199 | 0.681 | 6.47E-70    | CD2           | 5 | PTGDS_NK       |
| 1554 | 3.00E-45  | -1.21053044 | 0.109 | 0.449 | 6.55E-41    | CD8A          | 5 | PTGDS_NK       |
| 1555 | 1.28E-132 | -1.25866084 | 0.283 | 0.895 | 2.79E-128   | CD3E          | 5 | PTGDS_NK       |
| 1556 | 5.44E-70  | -1.26364357 | 0.181 | 0.628 | 1.19E-65    | CD52          | 5 | PTGDS_NK       |
| 1557 | 5.66E-43  | -1.66125926 | 0.113 | 0.435 | 1.23E-38    | IL7R          | 5 | PTGDS_NK       |
| 1558 | 3.46E-286 | 1.70622307  | 0.438 | 0.022 | 7.54E-282   | TRBV9         | 6 | TRBV9_CD8 Teff |
| 1559 | 0         | 1.51100965  | 0.393 | 0.009 | 0           | TRAV38-2DV8   | 6 | TRBV9_CD8 Teff |
| 1560 | 2.08E-88  | 1.14922293  | 0.15  | 0.009 | 4.53E-84    | TRBV13        | 6 | TRBV9_CD8 Teff |
| 1561 | 1.05E-67  | 0.99066125  | 0.26  | 0.044 | 2.28E-63    | RP11-291B21.1 | 6 | TRBV9_CD8 Teff |
| 1562 | 4.09E-109 | 0.88557073  | 0.327 | 0.043 | 8.91E-105   | TRGV5         | 6 | TRBV9_CD8 Teff |
| 1563 | 3.62E-89  | 0.88539756  | 0.925 | 0.499 | 7.90E-85    | GZMH          | 6 | TRBV9_CD8 Teff |
| 1564 | 7.41E-81  | 0.86552855  | 0.853 | 0.395 | 1.62E-76    | CD8A          | 6 | TRBV9_CD8 Teff |
| 1565 | 1.87E-58  | 0.83067601  | 0.845 | 0.577 | 4.09E-54    | CD52          | 6 | TRBV9_CD8 Teff |
| 1566 | 1.26E-51  | 0.71580702  | 0.687 | 0.349 | 2.74E-47    | CD3G          | 6 | TRBV9_CD8 Teff |
| 1567 | 1.08E-24  | 0.69171013  | 0.399 | 0.191 | 2.36E-20    | HLA-DRA       | 6 | TRBV9_CD8 Teff |
| 1568 | 3.43E-48  | 0.68419283  | 0.817 | 0.485 | 7.49E-44    | CD3D          | 6 | TRBV9_CD8 Teff |
| 1569 | 2.96E-36  | 0.64538523  | 0.324 | 0.103 | 6.46E-32    | TRGV2         | 6 | TRBV9_CD8 Teff |
| 1570 | 4.90E-41  | 0.63786112  | 0.512 | 0.207 | 1.07E-36    | CD8B          | 6 | TRBV9_CD8 Teff |
| 1571 | 6.56E-27  | 0.57574096  | 0.404 | 0.181 | 1.43E-22    | HLA-DQA1      | 6 | TRBV9_CD8 Teff |
| 1572 | 9.07E-51  | 0.57143309  | 0.875 | 0.412 | 1.98E-46    | GZMB          | 6 | TRBV9_CD8 Teff |
| 1573 | 4.94E-25  | 0.54317456  | 0.726 | 0.52  | 1.08E-20    | HLA-DRB1      | 6 | TRBV9_CD8 Teff |
| 1574 | 7.56E-41  | 0.54184482  | 0.687 | 0.308 | 1.65E-36    | FGFBP2        | 6 | TRBV9_CD8 Teff |
| 1575 | 1.56E-25  | 0.48798635  | 0.895 | 0.791 | 3.39E-21    | CD74          | 6 | TRBV9_CD8 Teff |
| 1576 | 7.75E-45  | 0.48783356  | 0.992 | 0.871 | 1.69E-40    | NKG7          | 6 | TRBV9_CD8 Teff |
| 1577 | 9.84E-16  | 0.48161428  | 0.438 | 0.267 | 2.15E-11    | ITGB1         | 6 | TRBV9_CD8 Teff |
| 1578 | 2.94E-16  | 0.47938644  | 0.188 | 0.071 | 6.40E-12    | TRGV3         | 6 | TRBV9_CD8 Teff |
| 1579 | 4.98E-19  | 0.46183818  | 0.637 | 0.434 | 1.09E-14    | HLA-DPB1      | 6 | TRBV9_CD8 Teff |
| 1580 | 5.28E-77  | 0.44957424  | 0.122 | 0.006 | 1.15E-72    | ZNF683        | 6 | TRBV9_CD8 Teff |
| 1581 | 5.91E-22  | 0.44206609  | 0.651 | 0.429 | 1.29E-17    | HLA-DPA1      | 6 | TRBV9_CD8 Teff |
| 1582 | 1.54E-15  | 0.43870603  | 0.435 | 0.257 | 3.36E-11    | HLA-DRB5      | 6 | TRBV9_CD8 Teff |
| 1583 | 2.44E-29  | 0.41030173  | 0.961 | 0.904 | 5.33E-25    | SH3BGRL3      | 6 | TRBV9_CD8 Teff |
| 1584 | 6.68E-18  | 0.40214708  | 0.44  | 0.239 | 1.46E-13    | ADGRG1        | 6 | TRBV9_CD8 Teff |
| 1585 | 2.03E-15  | 0.38926327  | 0.28  | 0.131 | 4.43E-11    | PRSS23        | 6 | TRBV9_CD8 Teff |
| 1586 | 1.23E-21  | 0.38181307  | 0.967 | 0.86  | 2.68E-17    | S100A4        | 6 | TRBV9_CD8 Teff |
| 1587 | 1.63E-09  | 0.37125903  | 0.296 | 0.175 | 3.57E-05    | THEMIS        | 6 | TRBV9_CD8 Teff |
| 1588 | 2.39E-10  | 0.36673627  | 0.499 | 0.353 | 5.22E-06    | FLNA          | 6 | TRBV9_CD8 Teff |
| 1589 | 1.58E-10  | 0.34788452  | 0.263 | 0.143 | 3.44E-06    | C1orf21       | 6 | TRBV9_CD8 Teff |
| 1590 | 1.34E-18  | 0.34142174  | 0.579 | 0.353 | 2.92E-14    | LGALS1        | 6 | TRBV9_CD8 Teff |
| 1591 | 1.67E-13  | 0.33340674  | 0.554 | 0.354 | 3.64E-09    | ZEB2          | 6 | TRBV9_CD8 Teff |
| 1592 | 8.34E-12  | 0.32895613  | 0.158 | 0.064 | 1.82E-07    | LILRB1        | 6 | TRBV9_CD8 Teff |
| 1593 | 8.79E-13  | 0.32587519  | 0.213 | 0.096 | 1.92E-08    | S1PR1         | 6 | TRBV9_CD8 Teff |
| 1594 | 2.05E-16  | 0.32351731  | 0.186 | 0.067 | 4.47E-12    | RP11-81H14.2  | 6 | TRBV9_CD8 Teff |
| 1595 | 8.81E-11  | 0.32050418  | 0.377 | 0.235 | 1.92E-06    | LAG3          | 6 | TRBV9_CD8 Teff |
| 1596 | 1.12E-10  | 0.31800233  | 0.346 | 0.209 | 2.44E-06    | RNF166        | 6 | TRBV9_CD8 Teff |
| 1597 | 3.14E-10  | 0.3138134   | 0.244 | 0.13  | 6.84E-06    | CD5           | 6 | TRBV9_CD8 Teff |
| 1598 | 1.90E-09  | 0.31055794  | 0.31  | 0.188 | 4.14E-05    | ITGB7         | 6 | TRBV9_CD8 Teff |
| 1599 | 6.19E-09  | 0.31036082  | 0.302 | 0.185 | 0.000135069 | SH3BP5        | 6 | TRBV9_CD8 Teff |
| 1600 | 2.17E-20  | 0.30718564  | 0.222 | 0.078 | 4.73E-16    | LAIR2         | 6 | TRBV9_CD8 Teff |
| 1601 | 1.36E-09  | 0.30500348  | 0.482 | 0.342 | 2.96E-05    | LYAR          | 6 | TRBV9_CD8 Teff |
| 1602 | 1.84E-06  | 0.29197528  | 0.238 | 0.15  | 0.040036116 | KLF3          | 6 | TRBV9_CD8 Teff |
| 1603 | 1.79E-08  | 0.28915386  | 0.546 | 0.416 | 0.000390151 | NME2          | 6 | TRBV9_CD8 Teff |
| 1604 | 7.76E-07  | 0.27248145  | 0.366 | 0.254 | 0.016932488 | COTL1         | 6 | TRBV9_CD8 Teff |
| 1605 | 7.99E-17  | 0.26894494  | 0.85  | 0.556 | 1.74E-12    | KLRD1         | 6 | TRBV9_CD8 Teff |
| 1606 | 2.28E-06  | 0.26542573  | 0.496 | 0.389 | 0.049651686 | STOM          | 6 | TRBV9_CD8 Teff |
| 1607 | 2.07E-16  | 0.26203187  | 0.889 | 0.691 | 4.51E-12    | PRF1          | 6 | TRBV9_CD8 Teff |
| 1608 | 4.29E-07  | 0.26040824  | 0.363 | 0.257 | 0.009363057 | CD6           | 6 | TRBV9_CD8 Teff |



|      |           |             |       |       |             |          |   |                  |
|------|-----------|-------------|-------|-------|-------------|----------|---|------------------|
| 1609 | 1.78E-07  | 0.25287534  | 0.205 | 0.115 | 0.003883298 | UBL3     | 6 | TRBV9_CD8 Teff   |
| 1610 | 1.68E-07  | 0.25127262  | 0.183 | 0.098 | 0.003661245 | CD226    | 6 | TRBV9_CD8 Teff   |
| 1611 | 1.84E-06  | -0.26894165 | 0.324 | 0.441 | 0.040028307 | PDCD4    | 6 | TRBV9_CD8 Teff   |
| 1612 | 5.99E-07  | -0.26937628 | 0.147 | 0.271 | 0.013052811 | LYST     | 6 | TRBV9_CD8 Teff   |
| 1613 | 8.16E-07  | -0.27342983 | 0.294 | 0.438 | 0.017787454 | CKLF     | 6 | TRBV9_CD8 Teff   |
| 1614 | 2.31E-07  | -0.28121214 | 0.108 | 0.227 | 0.005030163 | TOX      | 6 | TRBV9_CD8 Teff   |
| 1615 | 1.88E-06  | -0.28472951 | 0.197 | 0.318 | 0.040940817 | CSRNP1   | 6 | TRBV9_CD8 Teff   |
| 1616 | 2.65E-07  | -0.28794561 | 0.521 | 0.646 | 0.005770288 | TAGAP    | 6 | TRBV9_CD8 Teff   |
| 1617 | 7.62E-07  | -0.30491894 | 0.219 | 0.343 | 0.016623361 | RHOC     | 6 | TRBV9_CD8 Teff   |
| 1618 | 6.07E-11  | -0.31268141 | 0.914 | 0.944 | 1.32E-06    | ZFP36    | 6 | TRBV9_CD8 Teff   |
| 1619 | 1.18E-07  | -0.31431753 | 0.133 | 0.26  | 0.002578801 | RBMS1    | 6 | TRBV9_CD8 Teff   |
| 1620 | 7.30E-08  | -0.32235563 | 0.114 | 0.239 | 0.001591257 | CCND2    | 6 | TRBV9_CD8 Teff   |
| 1621 | 7.17E-11  | -0.33617043 | 0.817 | 0.864 | 1.56E-06    | DUSP2    | 6 | TRBV9_CD8 Teff   |
| 1622 | 5.02E-08  | -0.38196039 | 0.548 | 0.651 | 0.001094348 | PPP1R15A | 6 | TRBV9_CD8 Teff   |
| 1623 | 4.40E-09  | -0.3947181  | 0.673 | 0.781 | 9.59E-05    | JUN      | 6 | TRBV9_CD8 Teff   |
| 1624 | 3.64E-08  | -0.41098804 | 0.194 | 0.327 | 0.000793062 | IFNGR1   | 6 | TRBV9_CD8 Teff   |
| 1625 | 8.86E-10  | -0.44314068 | 0.335 | 0.486 | 1.93E-05    | BTG2     | 6 | TRBV9_CD8 Teff   |
| 1626 | 1.28E-08  | -0.45174638 | 0.731 | 0.789 | 0.00027936  | NFKBIA   | 6 | TRBV9_CD8 Teff   |
| 1627 | 3.37E-19  | -0.49512283 | 0.809 | 0.892 | 7.35E-15    | DUSP1    | 6 | TRBV9_CD8 Teff   |
| 1628 | 1.41E-12  | -0.51228894 | 0.161 | 0.337 | 3.07E-08    | NCR3     | 6 | TRBV9_CD8 Teff   |
| 1629 | 8.10E-12  | -0.52524665 | 0.263 | 0.438 | 1.77E-07    | NFKBIZ   | 6 | TRBV9_CD8 Teff   |
| 1630 | 3.08E-08  | -0.52553437 | 0.186 | 0.318 | 0.000671699 | IER3     | 6 | TRBV9_CD8 Teff   |
| 1631 | 1.94E-07  | -0.54896188 | 0.92  | 0.875 | 0.004240201 | CCL4     | 6 | TRBV9_CD8 Teff   |
| 1632 | 6.79E-24  | -0.61758178 | 0.806 | 0.907 | 1.48E-19    | CD69     | 6 | TRBV9_CD8 Teff   |
| 1633 | 1.96E-14  | -0.64266769 | 0.152 | 0.347 | 4.28E-10    | NR4A1    | 6 | TRBV9_CD8 Teff   |
| 1634 | 9.39E-19  | -0.65783616 | 0.319 | 0.546 | 2.05E-14    | FOSB     | 6 | TRBV9_CD8 Teff   |
| 1635 | 4.70E-12  | -0.69782841 | 0.202 | 0.371 | 1.02E-07    | RGS1     | 6 | TRBV9_CD8 Teff   |
| 1636 | 4.59E-13  | -0.73097806 | 0.133 | 0.304 | 1.00E-08    | LTB      | 6 | TRBV9_CD8 Teff   |
| 1637 | 1.57E-26  | -0.75805891 | 0.241 | 0.53  | 3.41E-22    | TRBC1    | 6 | TRBV9_CD8 Teff   |
| 1638 | 9.41E-26  | -0.77145303 | 0.679 | 0.842 | 2.05E-21    | FOS      | 6 | TRBV9_CD8 Teff   |
| 1639 | 2.15E-09  | -0.86026784 | 0.601 | 0.675 | 4.69E-05    | CCL4L2   | 6 | TRBV9_CD8 Teff   |
| 1640 | 5.99E-11  | -0.87806877 | 0.296 | 0.418 | 1.31E-06    | IL7R     | 6 | TRBV9_CD8 Teff   |
| 1641 | 1.51E-28  | -0.89741057 | 0.175 | 0.482 | 3.30E-24    | GZMK     | 6 | TRBV9_CD8 Teff   |
| 1642 | 1.03E-09  | -0.91731484 | 0.324 | 0.466 | 2.24E-05    | CCL3     | 6 | TRBV9_CD8 Teff   |
| 1643 | 1.56E-25  | -0.93740869 | 0.13  | 0.394 | 3.40E-21    | KLRF1    | 6 | TRBV9_CD8 Teff   |
| 1644 | 2.16E-27  | -0.98786616 | 0.371 | 0.625 | 4.72E-23    | KLRB1    | 6 | TRBV9_CD8 Teff   |
| 1645 | 1.40E-20  | -1.03182836 | 0.152 | 0.388 | 3.04E-16    | CCL3L3   | 6 | TRBV9_CD8 Teff   |
| 1646 | 2.10E-32  | -1.10391503 | 0.177 | 0.488 | 4.57E-28    | TYROBP   | 6 | TRBV9_CD8 Teff   |
| 1647 | 5.39E-21  | -1.23519961 | 0.183 | 0.411 | 1.18E-16    | AREG     | 6 | TRBV9_CD8 Teff   |
| 1648 | 5.08E-211 | 2.60016714  | 0.996 | 0.298 | 1.11E-206   | STMN1    | 7 | STMN1_NK-cycling |
| 1649 | 2.42E-112 | 2.20179349  | 0.883 | 0.352 | 5.27E-108   | HIST1H4C | 7 | STMN1_NK-cycling |
| 1650 | 0         | 2.04312952  | 0.786 | 0.032 | 0           | UBE2C    | 7 | STMN1_NK-cycling |
| 1651 | 1.27E-171 | 1.99210306  | 0.964 | 0.313 | 2.77E-167   | HMGB2    | 7 | STMN1_NK-cycling |
| 1652 | 1.83E-154 | 1.99040868  | 0.992 | 0.454 | 3.98E-150   | TUBB     | 7 | STMN1_NK-cycling |
| 1653 | 0         | 1.98909396  | 0.835 | 0.025 | 0           | TYMS     | 7 | STMN1_NK-cycling |
| 1654 | 6.63E-140 | 1.98405413  | 0.984 | 0.568 | 1.45E-135   | TUBA1B   | 7 | STMN1_NK-cycling |
| 1655 | 8.49E-146 | 1.8059396   | 0.992 | 0.531 | 1.85E-141   | HMG2     | 7 | STMN1_NK-cycling |
| 1656 | 0         | 1.77117043  | 0.806 | 0.04  | 0           | NUSAP1   | 7 | STMN1_NK-cycling |
| 1657 | 0         | 1.75682718  | 0.843 | 0.038 | 0           | MKI67    | 7 | STMN1_NK-cycling |
| 1658 | 0         | 1.73241916  | 0.762 | 0.029 | 0           | RRM2     | 7 | STMN1_NK-cycling |
| 1659 | 1.21E-98  | 1.71299856  | 0.911 | 0.444 | 2.63E-94    | ARL6IP1  | 7 | STMN1_NK-cycling |
| 1660 | 0         | 1.69337667  | 0.73  | 0.033 | 0           | ASPM     | 7 | STMN1_NK-cycling |
| 1661 | 0         | 1.67773553  | 0.738 | 0.032 | 0           | CENPF    | 7 | STMN1_NK-cycling |
| 1662 | 2.02E-304 | 1.63271553  | 0.839 | 0.086 | 4.40E-300   | SMC4     | 7 | STMN1_NK-cycling |
| 1663 | 0         | 1.63032361  | 0.742 | 0.035 | 0           | TOP2A    | 7 | STMN1_NK-cycling |
| 1664 | 1.27E-196 | 1.45784425  | 0.786 | 0.122 | 2.78E-192   | PTTG1    | 7 | STMN1_NK-cycling |
| 1665 | 0         | 1.39981225  | 0.69  | 0.029 | 0           | TPX2     | 7 | STMN1_NK-cycling |
| 1666 | 6.50E-112 | 1.35098704  | 0.984 | 0.603 | 1.42E-107   | H2AFZ    | 7 | STMN1_NK-cycling |
| 1667 | 0         | 1.35043795  | 0.746 | 0.059 | 0           | CKS1B    | 7 | STMN1_NK-cycling |
| 1668 | 0         | 1.29966487  | 0.669 | 0.025 | 0           | CDK1     | 7 | STMN1_NK-cycling |
| 1669 | 0         | 1.29353047  | 0.665 | 0.027 | 0           | BIRC5    | 7 | STMN1_NK-cycling |
| 1670 | 2.30E-270 | 1.25824637  | 0.524 | 0.029 | 5.02E-266   | CDC20    | 7 | STMN1_NK-cycling |
| 1671 | 3.75E-117 | 1.22487462  | 1     | 0.814 | 8.18E-113   | HMGB1    | 7 | STMN1_NK-cycling |
| 1672 | 4.02E-272 | 1.18452903  | 0.677 | 0.055 | 8.76E-268   | MAD2L1   | 7 | STMN1_NK-cycling |
| 1673 | 0         | 1.16324747  | 0.625 | 0.024 | 0           | CDCA8    | 7 | STMN1_NK-cycling |
| 1674 | 0         | 1.1617878   | 0.548 | 0.021 | 0           | KIAA0101 | 7 | STMN1_NK-cycling |
| 1675 | 0         | 1.15191984  | 0.54  | 0.021 | 0           | CCNB2    | 7 | STMN1_NK-cycling |
| 1676 | 3.52E-122 | 1.14990964  | 0.891 | 0.281 | 7.68E-118   | H2AFV    | 7 | STMN1_NK-cycling |
| 1677 | 2.26E-34  | 1.12907759  | 0.726 | 0.352 | 4.92E-30    | LGALS1   | 7 | STMN1_NK-cycling |
| 1678 | 0         | 1.12880146  | 0.585 | 0.019 | 0           | DLGAP5   | 7 | STMN1_NK-cycling |

|      |           |            |       |       |           |          |   |                  |
|------|-----------|------------|-------|-------|-----------|----------|---|------------------|
| 1679 | 0         | 1.12771975 | 0.609 | 0.025 | 0         | CDKN3    | 7 | STMN1_NK-cycling |
| 1680 | 2.47E-96  | 1.1240323  | 0.931 | 0.395 | 5.38E-92  | ANP32B   | 7 | STMN1_NK-cycling |
| 1681 | 1.76E-216 | 1.1112413  | 0.653 | 0.066 | 3.84E-212 | KIF20B   | 7 | STMN1_NK-cycling |
| 1682 | 1.49E-90  | 1.11028988 | 0.984 | 0.816 | 3.24E-86  | VIM      | 7 | STMN1_NK-cycling |
| 1683 | 0         | 1.10451334 | 0.613 | 0.021 | 0         | GTSE1    | 7 | STMN1_NK-cycling |
| 1684 | 0         | 1.09554011 | 0.556 | 0.024 | 0         | HMMR     | 7 | STMN1_NK-cycling |
| 1685 | 0         | 1.09072354 | 0.573 | 0.021 | 0         | CCNA2    | 7 | STMN1_NK-cycling |
| 1686 | 1.33E-153 | 1.08902947 | 0.774 | 0.137 | 2.91E-149 | TMPO     | 7 | STMN1_NK-cycling |
| 1687 | 0         | 1.08726363 | 0.488 | 0.017 | 0         | PLK1     | 7 | STMN1_NK-cycling |
| 1688 | 2.17E-86  | 1.07433653 | 0.601 | 0.141 | 4.74E-82  | KPNA2    | 7 | STMN1_NK-cycling |
| 1689 | 0         | 1.07079548 | 0.613 | 0.023 | 0         | KIFC1    | 7 | STMN1_NK-cycling |
| 1690 | 0         | 1.06867319 | 0.585 | 0.021 | 0         | CASC5    | 7 | STMN1_NK-cycling |
| 1691 | 7.27E-109 | 1.05850103 | 0.903 | 0.296 | 1.59E-104 | NUCKS1   | 7 | STMN1_NK-cycling |
| 1692 | 5.00E-186 | 1.05680541 | 0.694 | 0.089 | 1.09E-181 | KIF22    | 7 | STMN1_NK-cycling |
| 1693 | 8.59E-96  | 1.0383897  | 0.851 | 0.278 | 1.87E-91  | CKS2     | 7 | STMN1_NK-cycling |
| 1694 | 0         | 1.03800132 | 0.613 | 0.031 | 0         | RACGAP1  | 7 | STMN1_NK-cycling |
| 1695 | 2.97E-211 | 1.01672889 | 0.419 | 0.024 | 6.48E-207 | CCNB1    | 7 | STMN1_NK-cycling |
| 1696 | 0         | 1.01583699 | 0.577 | 0.027 | 0         | UBE2T    | 7 | STMN1_NK-cycling |
| 1697 | 2.26E-117 | 1.01008723 | 0.589 | 0.101 | 4.93E-113 | PCNA     | 7 | STMN1_NK-cycling |
| 1698 | 2.90E-107 | 1.00081791 | 0.859 | 0.244 | 6.33E-103 | NUCB2    | 7 | STMN1_NK-cycling |
| 1699 | 1.51E-80  | 0.98257386 | 0.875 | 0.346 | 3.29E-76  | RAD21    | 7 | STMN1_NK-cycling |
| 1700 | 0         | 0.98188139 | 0.46  | 0.011 | 0         | PKMYT1   | 7 | STMN1_NK-cycling |
| 1701 | 2.91E-307 | 0.97401351 | 0.56  | 0.028 | 6.36E-303 | NUF1     | 7 | STMN1_NK-cycling |
| 1702 | 3.90E-74  | 0.96504363 | 0.972 | 0.648 | 8.50E-70  | CRIP1    | 7 | STMN1_NK-cycling |
| 1703 | 5.68E-286 | 0.96095348 | 0.516 | 0.025 | 1.24E-281 | TROAP    | 7 | STMN1_NK-cycling |
| 1704 | 3.18E-85  | 0.95797444 | 0.891 | 0.347 | 6.94E-81  | DEK      | 7 | STMN1_NK-cycling |
| 1705 | 8.36E-301 | 0.95713788 | 0.573 | 0.03  | 1.82E-296 | PRC1     | 7 | STMN1_NK-cycling |
| 1706 | 1.85E-175 | 0.95318997 | 0.516 | 0.049 | 4.04E-171 | ATAD2    | 7 | STMN1_NK-cycling |
| 1707 | 2.12E-74  | 0.94433891 | 0.782 | 0.254 | 4.62E-70  | DUT      | 7 | STMN1_NK-cycling |
| 1708 | 9.61E-259 | 0.93311646 | 0.56  | 0.036 | 2.10E-254 | CENPM    | 7 | STMN1_NK-cycling |
| 1709 | 0         | 0.9319932  | 0.488 | 0.017 | 0         | KIF23    | 7 | STMN1_NK-cycling |
| 1710 | 5.25E-81  | 0.92609574 | 0.883 | 0.354 | 1.15E-76  | CALM3    | 7 | STMN1_NK-cycling |
| 1711 | 1.15E-239 | 0.92251649 | 0.536 | 0.036 | 2.51E-235 | EZH2     | 7 | STMN1_NK-cycling |
| 1712 | 4.05E-121 | 0.91589437 | 0.5   | 0.07  | 8.84E-117 | MCM7     | 7 | STMN1_NK-cycling |
| 1713 | 5.50E-60  | 0.91587274 | 0.96  | 0.705 | 1.20E-55  | CALM2    | 7 | STMN1_NK-cycling |
| 1714 | 0         | 0.90977754 | 0.464 | 0.01  | 0         | FAM64A   | 7 | STMN1_NK-cycling |
| 1715 | 6.78E-79  | 0.90804949 | 0.722 | 0.21  | 1.48E-74  | TUBA1C   | 7 | STMN1_NK-cycling |
| 1716 | 1.58E-187 | 0.90331625 | 0.625 | 0.069 | 3.44E-183 | CENPK    | 7 | STMN1_NK-cycling |
| 1717 | 0         | 0.88944959 | 0.512 | 0.018 | 0         | HJURP    | 7 | STMN1_NK-cycling |
| 1718 | 4.29E-100 | 0.88933574 | 0.71  | 0.157 | 9.36E-96  | TRDC     | 7 | STMN1_NK-cycling |
| 1719 | 6.41E-220 | 0.88777292 | 0.573 | 0.047 | 1.40E-215 | SMC2     | 7 | STMN1_NK-cycling |
| 1720 | 2.20E-90  | 0.87799822 | 0.762 | 0.207 | 4.79E-86  | ANP32E   | 7 | STMN1_NK-cycling |
| 1721 | 0         | 0.8767604  | 0.492 | 0.013 | 0         | RAD51AP1 | 7 | STMN1_NK-cycling |
| 1722 | 0         | 0.86402184 | 0.5   | 0.014 | 0         | CKAP2L   | 7 | STMN1_NK-cycling |
| 1723 | 0         | 0.8631052  | 0.444 | 0.013 | 0         | CDT1     | 7 | STMN1_NK-cycling |
| 1724 | 9.16E-90  | 0.85663951 | 0.673 | 0.162 | 2.00E-85  | CDKN2D   | 7 | STMN1_NK-cycling |
| 1725 | 0         | 0.8495909  | 0.476 | 0.016 | 0         | AURKB    | 7 | STMN1_NK-cycling |
| 1726 | 1.47E-85  | 0.84705547 | 0.722 | 0.199 | 3.21E-81  | DDX39A   | 7 | STMN1_NK-cycling |
| 1727 | 2.77E-112 | 0.84562256 | 0.694 | 0.139 | 6.03E-108 | CARHSP1  | 7 | STMN1_NK-cycling |
| 1728 | 7.90E-75  | 0.84158825 | 0.964 | 0.523 | 1.72E-70  | COX8A    | 7 | STMN1_NK-cycling |
| 1729 | 2.11E-122 | 0.8404069  | 0.617 | 0.101 | 4.61E-118 | LMNB1    | 7 | STMN1_NK-cycling |
| 1730 | 8.45E-87  | 0.83646378 | 0.694 | 0.178 | 1.84E-82  | CDC25B   | 7 | STMN1_NK-cycling |
| 1731 | 1.03E-156 | 0.83328315 | 0.508 | 0.053 | 2.25E-152 | CDKN2C   | 7 | STMN1_NK-cycling |
| 1732 | 5.83E-264 | 0.83015199 | 0.448 | 0.019 | 1.27E-259 | KIF14    | 7 | STMN1_NK-cycling |
| 1733 | 7.64E-255 | 0.82096278 | 0.448 | 0.02  | 1.67E-250 | CENPE    | 7 | STMN1_NK-cycling |
| 1734 | 3.80E-83  | 0.81910362 | 0.617 | 0.139 | 8.30E-79  | IGFBP7   | 7 | STMN1_NK-cycling |
| 1735 | 4.40E-77  | 0.81437414 | 0.827 | 0.277 | 9.59E-73  | BANF1    | 7 | STMN1_NK-cycling |
| 1736 | 4.20E-62  | 0.81341614 | 0.766 | 0.283 | 9.16E-58  | HN1      | 7 | STMN1_NK-cycling |
| 1737 | 1.35E-85  | 0.81249171 | 0.669 | 0.165 | 2.94E-81  | H2AFY    | 7 | STMN1_NK-cycling |
| 1738 | 6.34E-61  | 0.81230368 | 0.407 | 0.085 | 1.38E-56  | HIST1H1E | 7 | STMN1_NK-cycling |
| 1739 | 2.04E-254 | 0.80774078 | 0.448 | 0.021 | 4.45E-250 | NCAPH    | 7 | STMN1_NK-cycling |
| 1740 | 7.18E-105 | 0.8066835  | 1     | 0.991 | 1.57E-100 | PTMA     | 7 | STMN1_NK-cycling |
| 1741 | 1.58E-109 | 0.80474385 | 0.661 | 0.127 | 3.45E-105 | MZT1     | 7 | STMN1_NK-cycling |
| 1742 | 2.22E-285 | 0.80428397 | 0.407 | 0.013 | 4.85E-281 | UHRF1    | 7 | STMN1_NK-cycling |
| 1743 | 1.44E-258 | 0.79868001 | 0.456 | 0.021 | 3.14E-254 | ASF1B    | 7 | STMN1_NK-cycling |
| 1744 | 1.33E-276 | 0.79577297 | 0.452 | 0.018 | 2.90E-272 | CDCA2    | 7 | STMN1_NK-cycling |
| 1745 | 2.43E-291 | 0.79354886 | 0.431 | 0.014 | 5.30E-287 | ZWINT    | 7 | STMN1_NK-cycling |
| 1746 | 1.00E-225 | 0.79250237 | 0.468 | 0.028 | 2.19E-221 | SGOL2    | 7 | STMN1_NK-cycling |
| 1747 | 1.46E-60  | 0.79229353 | 0.806 | 0.313 | 3.19E-56  | HP1BP3   | 7 | STMN1_NK-cycling |
| 1748 | 7.98E-66  | 0.78862969 | 0.702 | 0.221 | 1.74E-61  | RHEB     | 7 | STMN1_NK-cycling |

|      |           |            |       |       |           |               |   |                  |
|------|-----------|------------|-------|-------|-----------|---------------|---|------------------|
| 1749 | 7.23E-301 | 0.78542045 | 0.423 | 0.013 | 1.58E-296 | CENPA         | 7 | STMN1_NK-cycling |
| 1750 | 4.49E-50  | 0.7844899  | 0.911 | 0.521 | 9.79E-46  | TUBB4B        | 7 | STMN1_NK-cycling |
| 1751 | 1.00E-208 | 0.7841715  | 0.423 | 0.024 | 2.19E-204 | DHFR          | 7 | STMN1_NK-cycling |
| 1752 | 8.18E-260 | 0.78138111 | 0.431 | 0.018 | 1.78E-255 | NCAPG         | 7 | STMN1_NK-cycling |
| 1753 | 3.03E-123 | 0.77961869 | 0.585 | 0.091 | 6.61E-119 | SKA2          | 7 | STMN1_NK-cycling |
| 1754 | 5.26E-269 | 0.77944582 | 0.383 | 0.012 | 1.15E-264 | SPC25         | 7 | STMN1_NK-cycling |
| 1755 | 1.48E-246 | 0.77938918 | 0.444 | 0.021 | 3.24E-242 | CDCA3         | 7 | STMN1_NK-cycling |
| 1756 | 5.01E-64  | 0.77893852 | 0.94  | 0.519 | 1.09E-59  | RAN           | 7 | STMN1_NK-cycling |
| 1757 | 1.03E-64  | 0.76545915 | 0.681 | 0.209 | 2.26E-60  | LSM5          | 7 | STMN1_NK-cycling |
| 1758 | 1.02E-159 | 0.76535575 | 0.528 | 0.057 | 2.22E-155 | NCAPD2        | 7 | STMN1_NK-cycling |
| 1759 | 0         | 0.76214495 | 0.435 | 0.011 | 0         | KIF15         | 7 | STMN1_NK-cycling |
| 1760 | 2.42E-268 | 0.7603133  | 0.355 | 0.009 | 5.28E-264 | CRNDE         | 7 | STMN1_NK-cycling |
| 1761 | 1.44E-287 | 0.7588871  | 0.411 | 0.013 | 3.13E-283 | CDCA5         | 7 | STMN1_NK-cycling |
| 1762 | 9.47E-263 | 0.75842113 | 0.391 | 0.013 | 2.07E-258 | CLSPN         | 7 | STMN1_NK-cycling |
| 1763 | 7.11E-88  | 0.7577236  | 0.633 | 0.142 | 1.55E-83  | USP1          | 7 | STMN1_NK-cycling |
| 1764 | 9.01E-141 | 0.75581422 | 0.54  | 0.067 | 1.96E-136 | TACC3         | 7 | STMN1_NK-cycling |
| 1765 | 3.45E-68  | 0.75456914 | 0.879 | 0.334 | 7.53E-64  | C12orf75      | 7 | STMN1_NK-cycling |
| 1766 | 6.53E-297 | 0.74488842 | 0.44  | 0.015 | 1.42E-292 | KIF2C         | 7 | STMN1_NK-cycling |
| 1767 | 5.26E-120 | 0.7431345  | 0.492 | 0.066 | 1.15E-115 | CKAP5         | 7 | STMN1_NK-cycling |
| 1768 | 2.35E-236 | 0.73639531 | 0.331 | 0.01  | 5.12E-232 | TK1           | 7 | STMN1_NK-cycling |
| 1769 | 3.85E-63  | 0.73241881 | 0.778 | 0.271 | 8.40E-59  | DCTN3         | 7 | STMN1_NK-cycling |
| 1770 | 9.19E-257 | 0.73023047 | 0.419 | 0.017 | 2.00E-252 | CENPU         | 7 | STMN1_NK-cycling |
| 1771 | 6.21E-202 | 0.72910255 | 0.435 | 0.027 | 1.35E-197 | SAC3D1        | 7 | STMN1_NK-cycling |
| 1772 | 3.16E-131 | 0.72876254 | 0.472 | 0.055 | 6.90E-127 | CKAP2         | 7 | STMN1_NK-cycling |
| 1773 | 7.05E-99  | 0.72708272 | 0.484 | 0.076 | 1.54E-94  | TMEM106C      | 7 | STMN1_NK-cycling |
| 1774 | 2.03E-190 | 0.72546847 | 0.496 | 0.04  | 4.44E-186 | RPL39L        | 7 | STMN1_NK-cycling |
| 1775 | 6.79E-135 | 0.71918243 | 0.262 | 0.014 | 1.48E-130 | HIST1H1B      | 7 | STMN1_NK-cycling |
| 1776 | 1.48E-100 | 0.714045   | 0.492 | 0.077 | 3.23E-96  | DNAJC9        | 7 | STMN1_NK-cycling |
| 1777 | 5.48E-227 | 0.70783372 | 0.387 | 0.017 | 1.20E-222 | CENPW         | 7 | STMN1_NK-cycling |
| 1778 | 6.10E-48  | 0.70736736 | 0.806 | 0.36  | 1.33E-43  | H2AFX         | 7 | STMN1_NK-cycling |
| 1779 | 4.39E-235 | 0.70502003 | 0.395 | 0.017 | 9.57E-231 | KIF11         | 7 | STMN1_NK-cycling |
| 1780 | 3.11E-54  | 0.70498585 | 0.919 | 0.468 | 6.77E-50  | HMGN1         | 7 | STMN1_NK-cycling |
| 1781 | 1.53E-86  | 0.70279746 | 0.472 | 0.082 | 3.34E-82  | RP11-620J15.3 | 7 | STMN1_NK-cycling |
| 1782 | 1.05E-144 | 0.70103253 | 0.476 | 0.05  | 2.30E-140 | DTYMK         | 7 | STMN1_NK-cycling |
| 1783 | 1.02E-241 | 0.70056881 | 0.419 | 0.019 | 2.22E-237 | DEPDC1B       | 7 | STMN1_NK-cycling |
| 1784 | 7.97E-70  | 0.69881473 | 0.593 | 0.148 | 1.74E-65  | FAM111A       | 7 | STMN1_NK-cycling |
| 1785 | 3.97E-242 | 0.69661833 | 0.403 | 0.017 | 8.65E-238 | BUB1          | 7 | STMN1_NK-cycling |
| 1786 | 3.19E-53  | 0.69457967 | 0.871 | 0.406 | 6.95E-49  | GNG5          | 7 | STMN1_NK-cycling |
| 1787 | 1.49E-48  | 0.6930274  | 0.835 | 0.359 | 3.25E-44  | UCP2          | 7 | STMN1_NK-cycling |
| 1788 | 6.73E-120 | 0.68948808 | 0.476 | 0.062 | 1.47E-115 | CD59          | 7 | STMN1_NK-cycling |
| 1789 | 2.41E-293 | 0.68873047 | 0.363 | 0.008 | 5.25E-289 | DEPDC1        | 7 | STMN1_NK-cycling |
| 1790 | 6.09E-217 | 0.68574062 | 0.415 | 0.022 | 1.33E-212 | PARPBP        | 7 | STMN1_NK-cycling |
| 1791 | 1.39E-164 | 0.68509273 | 0.391 | 0.028 | 3.04E-160 | AURKA         | 7 | STMN1_NK-cycling |
| 1792 | 1.06E-178 | 0.68429916 | 0.363 | 0.021 | 2.32E-174 | MXD3          | 7 | STMN1_NK-cycling |
| 1793 | 1.37E-88  | 0.67746176 | 0.548 | 0.106 | 2.98E-84  | SAE1          | 7 | STMN1_NK-cycling |
| 1794 | 6.92E-66  | 0.677313   | 0.585 | 0.148 | 1.51E-61  | RPA3          | 7 | STMN1_NK-cycling |
| 1795 | 8.93E-52  | 0.67588153 | 0.911 | 0.453 | 1.95E-47  | BUB3          | 7 | STMN1_NK-cycling |
| 1796 | 7.72E-114 | 0.67075136 | 0.452 | 0.058 | 1.68E-109 | PHF19         | 7 | STMN1_NK-cycling |
| 1797 | 3.43E-223 | 0.669693   | 0.383 | 0.017 | 7.48E-219 | SGOL1         | 7 | STMN1_NK-cycling |
| 1798 | 6.43E-203 | 0.66824598 | 0.411 | 0.023 | 1.40E-198 | NDC80         | 7 | STMN1_NK-cycling |
| 1799 | 1.48E-49  | 0.65976883 | 0.734 | 0.275 | 3.23E-45  | LBR           | 7 | STMN1_NK-cycling |
| 1800 | 7.64E-147 | 0.65521122 | 0.419 | 0.037 | 1.67E-142 | NCAPD3        | 7 | STMN1_NK-cycling |
| 1801 | 1.06E-221 | 0.65122203 | 0.399 | 0.019 | 2.30E-217 | GGH           | 7 | STMN1_NK-cycling |
| 1802 | 4.93E-273 | 0.64595512 | 0.367 | 0.01  | 1.08E-268 | APOBEC3B      | 7 | STMN1_NK-cycling |
| 1803 | 2.92E-70  | 0.64574701 | 0.609 | 0.153 | 6.38E-66  | SMS           | 7 | STMN1_NK-cycling |
| 1804 | 9.55E-60  | 0.64213915 | 0.73  | 0.232 | 2.08E-55  | ILF2          | 7 | STMN1_NK-cycling |
| 1805 | 1.75E-56  | 0.64145375 | 0.573 | 0.161 | 3.81E-52  | DNMT1         | 7 | STMN1_NK-cycling |
| 1806 | 2.46E-195 | 0.6397958  | 0.452 | 0.031 | 5.37E-191 | CENPN         | 7 | STMN1_NK-cycling |
| 1807 | 2.38E-60  | 0.63594732 | 0.988 | 0.834 | 5.19E-56  | HNRNPA2B1     | 7 | STMN1_NK-cycling |
| 1808 | 2.00E-92  | 0.63162238 | 0.448 | 0.069 | 4.37E-88  | RRM1          | 7 | STMN1_NK-cycling |
| 1809 | 3.81E-69  | 0.6314177  | 1     | 0.997 | 8.31E-65  | ACTB          | 7 | STMN1_NK-cycling |
| 1810 | 9.79E-188 | 0.63057757 | 0.359 | 0.019 | 2.13E-183 | FANCI         | 7 | STMN1_NK-cycling |
| 1811 | 8.28E-110 | 0.62808964 | 0.395 | 0.046 | 1.81E-105 | BARD1         | 7 | STMN1_NK-cycling |
| 1812 | 2.47E-69  | 0.62732911 | 0.577 | 0.137 | 5.38E-65  | EBP           | 7 | STMN1_NK-cycling |
| 1813 | 1.25E-45  | 0.62690771 | 0.895 | 0.495 | 2.72E-41  | SLC25A5       | 7 | STMN1_NK-cycling |
| 1814 | 7.91E-206 | 0.62644974 | 0.331 | 0.013 | 1.73E-201 | NEK2          | 7 | STMN1_NK-cycling |
| 1815 | 9.69E-177 | 0.6242797  | 0.351 | 0.019 | 2.11E-172 | TCF19         | 7 | STMN1_NK-cycling |
| 1816 | 4.06E-63  | 0.62363036 | 0.621 | 0.163 | 8.86E-59  | KIR3DL1       | 7 | STMN1_NK-cycling |
| 1817 | 1.41E-46  | 0.61970886 | 0.347 | 0.077 | 3.07E-42  | HIST1H1D      | 7 | STMN1_NK-cycling |
| 1818 | 7.35E-43  | 0.61543257 | 0.819 | 0.369 | 1.60E-38  | HMGN3         | 7 | STMN1_NK-cycling |

|      |           |            |       |       |           |             |   |                  |
|------|-----------|------------|-------|-------|-----------|-------------|---|------------------|
| 1819 | 4.20E-45  | 0.61265457 | 0.597 | 0.199 | 9.15E-41  | RANBP1      | 7 | STMN1_NK-cycling |
| 1820 | 1.28E-68  | 0.6093466  | 0.609 | 0.151 | 2.79E-64  | LSM4        | 7 | STMN1_NK-cycling |
| 1821 | 2.12E-63  | 0.60742717 | 0.581 | 0.147 | 4.63E-59  | UBE2S       | 7 | STMN1_NK-cycling |
| 1822 | 2.78E-140 | 0.60564044 | 0.323 | 0.022 | 6.07E-136 | FBXO5       | 7 | STMN1_NK-cycling |
| 1823 | 1.54E-46  | 0.60468762 | 0.589 | 0.187 | 3.37E-42  | HLA-DRA     | 7 | STMN1_NK-cycling |
| 1824 | 1.26E-61  | 0.60407013 | 0.698 | 0.205 | 2.76E-57  | SNRPD1      | 7 | STMN1_NK-cycling |
| 1825 | 1.52E-58  | 0.60196844 | 0.992 | 0.858 | 3.31E-54  | H3F3A       | 7 | STMN1_NK-cycling |
| 1826 | 2.41E-35  | 0.60140309 | 0.742 | 0.336 | 5.27E-31  | ANXA2       | 7 | STMN1_NK-cycling |
| 1827 | 9.13E-112 | 0.59780744 | 0.411 | 0.048 | 1.99E-107 | ITGB3BP     | 7 | STMN1_NK-cycling |
| 1828 | 1.53E-38  | 0.59712159 | 0.52  | 0.176 | 3.34E-34  | PTMS        | 7 | STMN1_NK-cycling |
| 1829 | 2.00E-52  | 0.59605402 | 0.673 | 0.216 | 4.35E-48  | PSIP1       | 7 | STMN1_NK-cycling |
| 1830 | 4.60E-52  | 0.59484162 | 0.415 | 0.098 | 1.00E-47  | SPTBN1      | 7 | STMN1_NK-cycling |
| 1831 | 6.21E-218 | 0.59436291 | 0.339 | 0.012 | 1.36E-213 | ANLN        | 7 | STMN1_NK-cycling |
| 1832 | 1.12E-37  | 0.59319647 | 0.875 | 0.464 | 2.44E-33  | RPS27L      | 7 | STMN1_NK-cycling |
| 1833 | 3.71E-38  | 0.59107629 | 0.843 | 0.428 | 8.10E-34  | ARPC5       | 7 | STMN1_NK-cycling |
| 1834 | 3.90E-223 | 0.58934062 | 0.306 | 0.009 | 8.52E-219 | ESCO2       | 7 | STMN1_NK-cycling |
| 1835 | 3.26E-40  | 0.58790132 | 0.669 | 0.25  | 7.10E-36  | HLA-DRB5    | 7 | STMN1_NK-cycling |
| 1836 | 3.22E-170 | 0.58464607 | 0.379 | 0.024 | 7.02E-166 | ARHGAP11A   | 7 | STMN1_NK-cycling |
| 1837 | 1.01E-158 | 0.58435916 | 0.327 | 0.019 | 2.21E-154 | BRCA2       | 7 | STMN1_NK-cycling |
| 1838 | 4.82E-45  | 0.58323263 | 0.601 | 0.197 | 1.05E-40  | SIVA1       | 7 | STMN1_NK-cycling |
| 1839 | 1.14E-159 | 0.58216783 | 0.339 | 0.021 | 2.49E-155 | ARHGAP11B   | 7 | STMN1_NK-cycling |
| 1840 | 4.42E-189 | 0.58056794 | 0.315 | 0.013 | 9.63E-185 | CEP55       | 7 | STMN1_NK-cycling |
| 1841 | 1.63E-64  | 0.57815836 | 0.504 | 0.115 | 3.56E-60  | MIS18BP1    | 7 | STMN1_NK-cycling |
| 1842 | 6.09E-52  | 0.57737291 | 0.706 | 0.234 | 1.33E-47  | VDAC3       | 7 | STMN1_NK-cycling |
| 1843 | 1.72E-172 | 0.5772771  | 0.343 | 0.019 | 3.75E-168 | NCAPG2      | 7 | STMN1_NK-cycling |
| 1844 | 9.23E-66  | 0.57407843 | 0.532 | 0.123 | 2.01E-61  | MAD2L2      | 7 | STMN1_NK-cycling |
| 1845 | 1.51E-36  | 0.5712698  | 0.915 | 0.523 | 3.30E-32  | GSTP1       | 7 | STMN1_NK-cycling |
| 1846 | 7.61E-184 | 0.56994979 | 0.347 | 0.018 | 1.66E-179 | ECT2        | 7 | STMN1_NK-cycling |
| 1847 | 4.07E-204 | 0.56917834 | 0.298 | 0.01  | 8.87E-200 | PBK         | 7 | STMN1_NK-cycling |
| 1848 | 1.68E-114 | 0.569093   | 0.351 | 0.034 | 3.65E-110 | WHSC1       | 7 | STMN1_NK-cycling |
| 1849 | 7.64E-196 | 0.56877909 | 0.327 | 0.014 | 1.67E-191 | TTK         | 7 | STMN1_NK-cycling |
| 1850 | 5.18E-43  | 0.56600316 | 0.899 | 0.359 | 1.13E-38  | GNLY        | 7 | STMN1_NK-cycling |
| 1851 | 8.09E-93  | 0.56587553 | 0.258 | 0.022 | 1.77E-88  | HIST1H2AJ   | 7 | STMN1_NK-cycling |
| 1852 | 2.22E-55  | 0.56499091 | 0.44  | 0.102 | 4.85E-51  | SMC1A       | 7 | STMN1_NK-cycling |
| 1853 | 4.85E-45  | 0.56400661 | 0.98  | 0.721 | 1.06E-40  | YBX1        | 7 | STMN1_NK-cycling |
| 1854 | 1.78E-60  | 0.56294071 | 0.387 | 0.075 | 3.88E-56  | MCM3        | 7 | STMN1_NK-cycling |
| 1855 | 3.31E-58  | 0.56224169 | 0.468 | 0.109 | 7.22E-54  | DDB2        | 7 | STMN1_NK-cycling |
| 1856 | 1.47E-191 | 0.56055412 | 0.306 | 0.012 | 3.20E-187 | KIF4A       | 7 | STMN1_NK-cycling |
| 1857 | 7.03E-103 | 0.55951934 | 0.323 | 0.032 | 1.53E-98  | LIG1        | 7 | STMN1_NK-cycling |
| 1858 | 2.40E-93  | 0.55777676 | 0.387 | 0.051 | 5.24E-89  | REEP4       | 7 | STMN1_NK-cycling |
| 1859 | 5.51E-77  | 0.55703589 | 0.488 | 0.092 | 1.20E-72  | PRPSAP1     | 7 | STMN1_NK-cycling |
| 1860 | 3.07E-55  | 0.55520782 | 1     | 0.939 | 6.70E-51  | GAPDH       | 7 | STMN1_NK-cycling |
| 1861 | 1.11E-48  | 0.55486838 | 0.597 | 0.183 | 2.43E-44  | LSM3        | 7 | STMN1_NK-cycling |
| 1862 | 4.29E-36  | 0.55249114 | 0.738 | 0.308 | 9.36E-32  | TPM4        | 7 | STMN1_NK-cycling |
| 1863 | 1.69E-107 | 0.55071748 | 0.254 | 0.018 | 3.68E-103 | HELLS       | 7 | STMN1_NK-cycling |
| 1864 | 1.82E-164 | 0.54952189 | 0.298 | 0.014 | 3.96E-160 | SPAG5       | 7 | STMN1_NK-cycling |
| 1865 | 3.00E-44  | 0.54847568 | 0.633 | 0.217 | 6.55E-40  | DCK         | 7 | STMN1_NK-cycling |
| 1866 | 1.60E-52  | 0.54806219 | 0.573 | 0.162 | 3.50E-48  | MIR4435-2HG | 7 | STMN1_NK-cycling |
| 1867 | 6.93E-47  | 0.54736071 | 1     | 0.958 | 1.51E-42  | ACTG1       | 7 | STMN1_NK-cycling |
| 1868 | 8.41E-33  | 0.54557276 | 0.786 | 0.399 | 1.83E-28  | CDK2AP2     | 7 | STMN1_NK-cycling |
| 1869 | 2.52E-45  | 0.54351166 | 0.629 | 0.209 | 5.49E-41  | IDH2        | 7 | STMN1_NK-cycling |
| 1870 | 7.07E-49  | 0.54050169 | 0.605 | 0.187 | 1.54E-44  | MZT2B       | 7 | STMN1_NK-cycling |
| 1871 | 7.84E-68  | 0.53951596 | 0.423 | 0.08  | 1.71E-63  | NUDT1       | 7 | STMN1_NK-cycling |
| 1872 | 1.12E-210 | 0.5380432  | 0.319 | 0.011 | 2.43E-206 | PSRC1       | 7 | STMN1_NK-cycling |
| 1873 | 5.28E-40  | 0.53692882 | 0.98  | 0.691 | 1.15E-35  | S100A10     | 7 | STMN1_NK-cycling |
| 1874 | 4.21E-72  | 0.53513192 | 0.435 | 0.08  | 9.17E-68  | CBX5        | 7 | STMN1_NK-cycling |
| 1875 | 6.23E-53  | 0.53463804 | 0.282 | 0.047 | 1.36E-48  | MCM5        | 7 | STMN1_NK-cycling |
| 1876 | 6.59E-181 | 0.53342953 | 0.29  | 0.011 | 1.44E-176 | NEIL3       | 7 | STMN1_NK-cycling |
| 1877 | 1.03E-35  | 0.53162831 | 0.875 | 0.507 | 2.25E-31  | HNRNPA3     | 7 | STMN1_NK-cycling |
| 1878 | 1.21E-29  | 0.53117078 | 0.556 | 0.229 | 2.64E-25  | NASP        | 7 | STMN1_NK-cycling |
| 1879 | 2.45E-108 | 0.52766772 | 0.274 | 0.021 | 5.35E-104 | FEN1        | 7 | STMN1_NK-cycling |
| 1880 | 6.00E-94  | 0.5265092  | 0.371 | 0.046 | 1.31E-89  | GMNN        | 7 | STMN1_NK-cycling |
| 1881 | 7.63E-37  | 0.5251098  | 0.774 | 0.357 | 1.66E-32  | ERH         | 7 | STMN1_NK-cycling |
| 1882 | 1.66E-35  | 0.52193572 | 0.726 | 0.298 | 3.62E-31  | CBX3        | 7 | STMN1_NK-cycling |
| 1883 | 4.04E-42  | 0.52150345 | 0.532 | 0.168 | 8.82E-38  | SMC3        | 7 | STMN1_NK-cycling |
| 1884 | 3.02E-120 | 0.51996408 | 0.246 | 0.014 | 6.58E-116 | HMGB3       | 7 | STMN1_NK-cycling |
| 1885 | 2.69E-51  | 0.51985069 | 0.476 | 0.121 | 5.88E-47  | CNTRL       | 7 | STMN1_NK-cycling |
| 1886 | 1.24E-144 | 0.51802186 | 0.27  | 0.014 | 2.70E-140 | KIF20A      | 7 | STMN1_NK-cycling |
| 1887 | 8.65E-76  | 0.51669825 | 0.399 | 0.065 | 1.89E-71  | ACYP1       | 7 | STMN1_NK-cycling |
| 1888 | 2.36E-34  | 0.51403253 | 0.71  | 0.295 | 5.14E-30  | HNRNPR      | 7 | STMN1_NK-cycling |

|      |           |            |       |       |           |          |   |                  |
|------|-----------|------------|-------|-------|-----------|----------|---|------------------|
| 1889 | 7.74E-43  | 0.5136244  | 0.867 | 0.356 | 1.69E-38  | KLRF1    | 7 | STMN1_NK-cycling |
| 1890 | 2.16E-201 | 0.51343608 | 0.294 | 0.009 | 4.70E-197 | MELK     | 7 | STMN1_NK-cycling |
| 1891 | 1.88E-40  | 0.51334648 | 0.972 | 0.794 | 4.11E-36  | CLIC1    | 7 | STMN1_NK-cycling |
| 1892 | 3.57E-96  | 0.50969038 | 0.323 | 0.034 | 7.79E-92  | LMNB2    | 7 | STMN1_NK-cycling |
| 1893 | 3.27E-48  | 0.50660562 | 0.472 | 0.122 | 7.12E-44  | STRA13   | 7 | STMN1_NK-cycling |
| 1894 | 2.39E-34  | 0.50615757 | 0.927 | 0.59  | 5.21E-30  | EMP3     | 7 | STMN1_NK-cycling |
| 1895 | 5.07E-59  | 0.50596874 | 0.48  | 0.11  | 1.11E-54  | DBF4     | 7 | STMN1_NK-cycling |
| 1896 | 7.22E-45  | 0.5053347  | 0.609 | 0.195 | 1.58E-40  | DCAF7    | 7 | STMN1_NK-cycling |
| 1897 | 1.08E-43  | 0.50451819 | 0.556 | 0.172 | 2.36E-39  | RBBP7    | 7 | STMN1_NK-cycling |
| 1898 | 1.74E-56  | 0.50415517 | 1     | 0.978 | 3.80E-52  | PFN1     | 7 | STMN1_NK-cycling |
| 1899 | 2.03E-193 | 0.50171695 | 0.274 | 0.008 | 4.44E-189 | SKA1     | 7 | STMN1_NK-cycling |
| 1900 | 3.85E-49  | 0.50121414 | 1     | 0.935 | 8.40E-45  | CFL1     | 7 | STMN1_NK-cycling |
| 1901 | 2.08E-86  | 0.50074507 | 0.29  | 0.031 | 4.54E-82  | NRM      | 7 | STMN1_NK-cycling |
| 1902 | 1.21E-52  | 0.50052186 | 1     | 0.941 | 2.65E-48  | PPIA     | 7 | STMN1_NK-cycling |
| 1903 | 1.07E-58  | 0.49935432 | 0.456 | 0.1   | 2.33E-54  | CD38     | 7 | STMN1_NK-cycling |
| 1904 | 1.56E-37  | 0.49815905 | 0.706 | 0.273 | 3.41E-33  | NONO     | 7 | STMN1_NK-cycling |
| 1905 | 6.69E-134 | 0.49662841 | 0.242 | 0.011 | 1.46E-129 | ORC6     | 7 | STMN1_NK-cycling |
| 1906 | 2.07E-34  | 0.4930761  | 0.952 | 0.704 | 4.52E-30  | SUMO2    | 7 | STMN1_NK-cycling |
| 1907 | 2.04E-32  | 0.49247371 | 0.786 | 0.366 | 4.44E-28  | RALY     | 7 | STMN1_NK-cycling |
| 1908 | 3.74E-212 | 0.49119682 | 0.29  | 0.008 | 8.16E-208 | FOXM1    | 7 | STMN1_NK-cycling |
| 1909 | 7.71E-90  | 0.4841722  | 0.351 | 0.043 | 1.68E-85  | HIRIP3   | 7 | STMN1_NK-cycling |
| 1910 | 1.39E-28  | 0.48392704 | 0.827 | 0.458 | 3.04E-24  | LRRFIP1  | 7 | STMN1_NK-cycling |
| 1911 | 1.12E-38  | 0.48126422 | 0.694 | 0.259 | 2.45E-34  | DCXR     | 7 | STMN1_NK-cycling |
| 1912 | 9.95E-27  | 0.48003024 | 0.488 | 0.191 | 2.17E-22  | SLBP     | 7 | STMN1_NK-cycling |
| 1913 | 2.35E-29  | 0.47954921 | 0.609 | 0.253 | 5.12E-25  | CDKN1A   | 7 | STMN1_NK-cycling |
| 1914 | 1.97E-33  | 0.47763858 | 0.593 | 0.223 | 4.29E-29  | PLP2     | 7 | STMN1_NK-cycling |
| 1915 | 1.34E-149 | 0.47206321 | 0.242 | 0.009 | 2.91E-145 | MND1     | 7 | STMN1_NK-cycling |
| 1916 | 7.71E-28  | 0.4717975  | 0.855 | 0.471 | 1.68E-23  | DBI      | 7 | STMN1_NK-cycling |
| 1917 | 4.03E-41  | 0.4711066  | 0.427 | 0.115 | 8.80E-37  | HPRT1    | 7 | STMN1_NK-cycling |
| 1918 | 2.02E-24  | 0.47021877 | 0.915 | 0.563 | 4.41E-20  | TPI1     | 7 | STMN1_NK-cycling |
| 1919 | 2.31E-80  | 0.46996821 | 0.282 | 0.032 | 5.04E-76  | CCDC34   | 7 | STMN1_NK-cycling |
| 1920 | 2.73E-49  | 0.46563171 | 0.274 | 0.047 | 5.95E-45  | CDKN2A   | 7 | STMN1_NK-cycling |
| 1921 | 1.96E-89  | 0.46555264 | 0.351 | 0.043 | 4.27E-85  | BCL2L12  | 7 | STMN1_NK-cycling |
| 1922 | 6.42E-37  | 0.46458884 | 0.613 | 0.216 | 1.40E-32  | BLOC1S1  | 7 | STMN1_NK-cycling |
| 1923 | 1.80E-19  | 0.46337727 | 0.831 | 0.518 | 3.93E-15  | HNRNPF   | 7 | STMN1_NK-cycling |
| 1924 | 3.39E-39  | 0.46253072 | 0.968 | 0.776 | 7.39E-35  | RHOA     | 7 | STMN1_NK-cycling |
| 1925 | 2.48E-31  | 0.46225667 | 0.806 | 0.385 | 5.41E-27  | SRP9     | 7 | STMN1_NK-cycling |
| 1926 | 1.99E-146 | 0.4613656  | 0.23  | 0.008 | 4.34E-142 | HIST1H3B | 7 | STMN1_NK-cycling |
| 1927 | 1.70E-42  | 0.46065709 | 0.56  | 0.174 | 3.70E-38  | YWHAH    | 7 | STMN1_NK-cycling |
| 1928 | 2.28E-30  | 0.45634434 | 0.589 | 0.233 | 4.97E-26  | MRPL51   | 7 | STMN1_NK-cycling |
| 1929 | 3.28E-160 | 0.45519031 | 0.238 | 0.008 | 7.16E-156 | STIL     | 7 | STMN1_NK-cycling |
| 1930 | 1.18E-57  | 0.45380456 | 0.383 | 0.076 | 2.58E-53  | RUVBL2   | 7 | STMN1_NK-cycling |
| 1931 | 2.19E-111 | 0.45328213 | 0.27  | 0.02  | 4.78E-107 | SPDL1    | 7 | STMN1_NK-cycling |
| 1932 | 2.23E-81  | 0.45295005 | 0.254 | 0.025 | 4.85E-77  | CENPH    | 7 | STMN1_NK-cycling |
| 1933 | 2.46E-31  | 0.45286629 | 0.351 | 0.1   | 5.38E-27  | HIST1H1C | 7 | STMN1_NK-cycling |
| 1934 | 6.65E-181 | 0.45074117 | 0.274 | 0.009 | 1.45E-176 | DIAPH3   | 7 | STMN1_NK-cycling |
| 1935 | 1.00E-120 | 0.44207784 | 0.298 | 0.022 | 2.19E-116 | FAM83D   | 7 | STMN1_NK-cycling |
| 1936 | 7.12E-91  | 0.44061228 | 0.266 | 0.024 | 1.55E-86  | TTF2     | 7 | STMN1_NK-cycling |
| 1937 | 2.24E-30  | 0.44000456 | 0.633 | 0.246 | 4.89E-26  | KHDRBS1  | 7 | STMN1_NK-cycling |
| 1938 | 1.27E-67  | 0.43900798 | 0.315 | 0.046 | 2.77E-63  | RNASEH2A | 7 | STMN1_NK-cycling |
| 1939 | 8.99E-34  | 0.43418499 | 0.524 | 0.179 | 1.96E-29  | UBE2E3   | 7 | STMN1_NK-cycling |
| 1940 | 1.51E-28  | 0.43414928 | 0.992 | 0.804 | 3.30E-24  | ARPC2    | 7 | STMN1_NK-cycling |
| 1941 | 2.43E-28  | 0.43381118 | 0.952 | 0.608 | 5.29E-24  | PSMB9    | 7 | STMN1_NK-cycling |
| 1942 | 3.58E-61  | 0.43377792 | 0.282 | 0.041 | 7.82E-57  | DLEU2    | 7 | STMN1_NK-cycling |
| 1943 | 9.54E-29  | 0.43221442 | 0.649 | 0.271 | 2.08E-24  | NDUFA2   | 7 | STMN1_NK-cycling |
| 1944 | 1.15E-32  | 0.43192125 | 0.387 | 0.113 | 2.51E-28  | HAT1     | 7 | STMN1_NK-cycling |
| 1945 | 7.94E-28  | 0.43188562 | 0.98  | 0.789 | 1.73E-23  | CD74     | 7 | STMN1_NK-cycling |
| 1946 | 1.41E-28  | 0.43177911 | 0.657 | 0.281 | 3.07E-24  | SPN      | 7 | STMN1_NK-cycling |
| 1947 | 2.23E-133 | 0.43147006 | 0.246 | 0.012 | 4.86E-129 | BRCA1    | 7 | STMN1_NK-cycling |
| 1948 | 3.87E-55  | 0.43145008 | 0.315 | 0.055 | 8.45E-51  | CCDC18   | 7 | STMN1_NK-cycling |
| 1949 | 1.95E-124 | 0.42958654 | 0.242 | 0.013 | 4.25E-120 | KIF18A   | 7 | STMN1_NK-cycling |
| 1950 | 2.98E-133 | 0.42696919 | 0.242 | 0.012 | 6.51E-129 | BUB1B    | 7 | STMN1_NK-cycling |
| 1951 | 8.17E-152 | 0.42467495 | 0.262 | 0.011 | 1.78E-147 | SHCBP1   | 7 | STMN1_NK-cycling |
| 1952 | 6.58E-129 | 0.42425963 | 0.226 | 0.01  | 1.43E-124 | POC1A    | 7 | STMN1_NK-cycling |
| 1953 | 1.06E-55  | 0.42409996 | 0.246 | 0.035 | 2.31E-51  | RFC4     | 7 | STMN1_NK-cycling |
| 1954 | 8.92E-23  | 0.4240259  | 0.714 | 0.353 | 1.95E-18  | NAP1L1   | 7 | STMN1_NK-cycling |
| 1955 | 5.63E-142 | 0.42366026 | 0.23  | 0.009 | 1.23E-137 | C21orf58 | 7 | STMN1_NK-cycling |
| 1956 | 2.32E-28  | 0.42305382 | 0.552 | 0.215 | 5.05E-24  | HSPB11   | 7 | STMN1_NK-cycling |
| 1957 | 6.51E-120 | 0.42225848 | 0.218 | 0.01  | 1.42E-115 | WDR34    | 7 | STMN1_NK-cycling |
| 1958 | 9.25E-102 | 0.4221069  | 0.234 | 0.016 | 2.02E-97  | ATAD5    | 7 | STMN1_NK-cycling |

|      |           |            |       |       |           |          |   |                  |
|------|-----------|------------|-------|-------|-----------|----------|---|------------------|
| 1959 | 2.65E-28  | 0.42209083 | 0.972 | 0.807 | 5.77E-24  | RAC2     | 7 | STMN1_NK-cycling |
| 1960 | 5.04E-114 | 0.42079018 | 0.254 | 0.016 | 1.10E-109 | GP2SM2   | 7 | STMN1_NK-cycling |
| 1961 | 6.71E-21  | 0.41939694 | 0.73  | 0.365 | 1.46E-16  | PGAM1    | 7 | STMN1_NK-cycling |
| 1962 | 1.23E-173 | 0.41746702 | 0.218 | 0.005 | 2.68E-169 | FAM111B  | 7 | STMN1_NK-cycling |
| 1963 | 1.53E-118 | 0.41705593 | 0.234 | 0.013 | 3.33E-114 | CCNF     | 7 | STMN1_NK-cycling |
| 1964 | 7.00E-29  | 0.41702269 | 0.512 | 0.19  | 1.53E-24  | CCT5     | 7 | STMN1_NK-cycling |
| 1965 | 1.20E-24  | 0.41586845 | 0.859 | 0.518 | 2.62E-20  | HLA-DRB1 | 7 | STMN1_NK-cycling |
| 1966 | 1.78E-138 | 0.41573272 | 0.226 | 0.009 | 3.89E-134 | CDC25C   | 7 | STMN1_NK-cycling |
| 1967 | 5.30E-25  | 0.41494475 | 0.899 | 0.548 | 1.16E-20  | LDHA     | 7 | STMN1_NK-cycling |
| 1968 | 1.66E-141 | 0.41462817 | 0.258 | 0.012 | 3.63E-137 | VANGL1   | 7 | STMN1_NK-cycling |
| 1969 | 2.97E-72  | 0.41448498 | 0.254 | 0.028 | 6.48E-68  | ACOT7    | 7 | STMN1_NK-cycling |
| 1970 | 3.87E-25  | 0.41335298 | 0.726 | 0.343 | 8.43E-21  | SNRPB    | 7 | STMN1_NK-cycling |
| 1971 | 1.88E-36  | 0.4130177  | 0.395 | 0.11  | 4.10E-32  | HMGA1    | 7 | STMN1_NK-cycling |
| 1972 | 5.98E-163 | 0.41266086 | 0.246 | 0.008 | 1.30E-158 | SKA3     | 7 | STMN1_NK-cycling |
| 1973 | 6.58E-37  | 0.41231518 | 0.508 | 0.16  | 1.43E-32  | CEP57    | 7 | STMN1_NK-cycling |
| 1974 | 9.38E-19  | 0.41175031 | 0.681 | 0.361 | 2.05E-14  | SYNE2    | 7 | STMN1_NK-cycling |
| 1975 | 8.98E-23  | 0.41093905 | 0.706 | 0.354 | 1.96E-18  | BSG      | 7 | STMN1_NK-cycling |
| 1976 | 1.29E-39  | 0.40983278 | 0.379 | 0.096 | 2.80E-35  | SCLT1    | 7 | STMN1_NK-cycling |
| 1977 | 2.42E-35  | 0.40911767 | 0.581 | 0.198 | 5.29E-31  | TALDO1   | 7 | STMN1_NK-cycling |
| 1978 | 5.55E-143 | 0.4081494  | 0.198 | 0.006 | 1.21E-138 | DTL      | 7 | STMN1_NK-cycling |
| 1979 | 1.05E-38  | 0.40805972 | 0.823 | 0.321 | 2.30E-34  | FCGR3A   | 7 | STMN1_NK-cycling |
| 1980 | 9.24E-58  | 0.40699935 | 0.347 | 0.063 | 2.02E-53  | HADH     | 7 | STMN1_NK-cycling |
| 1981 | 7.60E-61  | 0.40622595 | 0.399 | 0.076 | 1.66E-56  | VRK1     | 7 | STMN1_NK-cycling |
| 1982 | 6.33E-48  | 0.4060431  | 0.431 | 0.105 | 1.38E-43  | TPRKB    | 7 | STMN1_NK-cycling |
| 1983 | 4.33E-124 | 0.40580594 | 0.246 | 0.013 | 9.45E-120 | CBR3     | 7 | STMN1_NK-cycling |
| 1984 | 3.95E-24  | 0.40523131 | 0.778 | 0.386 | 8.61E-20  | SNRPG    | 7 | STMN1_NK-cycling |
| 1985 | 1.60E-23  | 0.40491402 | 0.597 | 0.257 | 3.48E-19  | CLTA     | 7 | STMN1_NK-cycling |
| 1986 | 4.17E-115 | 0.40451123 | 0.25  | 0.016 | 9.10E-111 | KNSTRN   | 7 | STMN1_NK-cycling |
| 1987 | 8.08E-117 | 0.4040373  | 0.254 | 0.016 | 1.76E-112 | ARHGEF39 | 7 | STMN1_NK-cycling |
| 1988 | 9.30E-103 | 0.40385726 | 0.242 | 0.017 | 2.03E-98  | KIAA1524 | 7 | STMN1_NK-cycling |
| 1989 | 5.19E-22  | 0.40264783 | 0.669 | 0.338 | 1.13E-17  | SDCBP    | 7 | STMN1_NK-cycling |
| 1990 | 3.31E-21  | 0.40235853 | 0.895 | 0.555 | 7.23E-17  | SRSF3    | 7 | STMN1_NK-cycling |
| 1991 | 6.42E-46  | 0.40105484 | 0.347 | 0.075 | 1.40E-41  | YEATS4   | 7 | STMN1_NK-cycling |
| 1992 | 3.35E-32  | 0.39677159 | 0.633 | 0.237 | 7.31E-28  | STARD3NL | 7 | STMN1_NK-cycling |
| 1993 | 1.71E-23  | 0.39591834 | 0.778 | 0.394 | 3.73E-19  | PTPN6    | 7 | STMN1_NK-cycling |
| 1994 | 2.06E-23  | 0.39382027 | 0.931 | 0.62  | 4.49E-19  | 7-Sep    | 7 | STMN1_NK-cycling |
| 1995 | 2.59E-21  | 0.39344449 | 0.879 | 0.581 | 5.65E-17  | TMBIM6   | 7 | STMN1_NK-cycling |
| 1996 | 9.47E-31  | 0.39269715 | 0.464 | 0.154 | 2.06E-26  | HNRNPAB  | 7 | STMN1_NK-cycling |
| 1997 | 2.14E-65  | 0.39151188 | 0.254 | 0.032 | 4.66E-61  | LRR1     | 7 | STMN1_NK-cycling |
| 1998 | 1.32E-33  | 0.3911327  | 0.431 | 0.131 | 2.88E-29  | PSMC3    | 7 | STMN1_NK-cycling |
| 1999 | 1.46E-23  | 0.39044557 | 0.968 | 0.812 | 3.18E-19  | UBB      | 7 | STMN1_NK-cycling |
| 2000 | 2.17E-27  | 0.38985182 | 0.585 | 0.229 | 4.72E-23  | PSMG2    | 7 | STMN1_NK-cycling |
| 2001 | 9.22E-107 | 0.38890396 | 0.21  | 0.011 | 2.01E-102 | CHEK2    | 7 | STMN1_NK-cycling |
| 2002 | 1.99E-20  | 0.38878687 | 0.819 | 0.495 | 4.34E-16  | HNRNPA0  | 7 | STMN1_NK-cycling |
| 2003 | 6.95E-87  | 0.3887483  | 0.222 | 0.017 | 1.52E-82  | INCENP   | 7 | STMN1_NK-cycling |
| 2004 | 1.54E-38  | 0.38736602 | 0.391 | 0.102 | 3.37E-34  | SUZ12    | 7 | STMN1_NK-cycling |
| 2005 | 6.89E-24  | 0.38660101 | 0.927 | 0.733 | 1.50E-19  | MYL12B   | 7 | STMN1_NK-cycling |
| 2006 | 1.19E-27  | 0.38556578 | 0.593 | 0.238 | 2.60E-23  | PSMA4    | 7 | STMN1_NK-cycling |
| 2007 | 7.48E-33  | 0.38554643 | 0.444 | 0.139 | 1.63E-28  | AP1S2    | 7 | STMN1_NK-cycling |
| 2008 | 2.30E-21  | 0.38361086 | 0.847 | 0.457 | 5.01E-17  | ATP5G3   | 7 | STMN1_NK-cycling |
| 2009 | 2.23E-42  | 0.38248886 | 0.355 | 0.082 | 4.87E-38  | PDS5B    | 7 | STMN1_NK-cycling |
| 2010 | 2.54E-26  | 0.3819013  | 0.524 | 0.199 | 5.55E-22  | NDUFAF3  | 7 | STMN1_NK-cycling |
| 2011 | 4.05E-20  | 0.38146217 | 0.427 | 0.172 | 8.83E-16  | ATF3     | 7 | STMN1_NK-cycling |
| 2012 | 3.81E-49  | 0.37975621 | 0.343 | 0.069 | 8.31E-45  | RANGAP1  | 7 | STMN1_NK-cycling |
| 2013 | 3.25E-39  | 0.37954187 | 0.476 | 0.136 | 7.10E-35  | C1orf21  | 7 | STMN1_NK-cycling |
| 2014 | 1.13E-24  | 0.37867444 | 0.657 | 0.29  | 2.47E-20  | SNRPD3   | 7 | STMN1_NK-cycling |
| 2015 | 7.79E-27  | 0.37832764 | 0.581 | 0.229 | 1.70E-22  | MDH1     | 7 | STMN1_NK-cycling |
| 2016 | 6.63E-29  | 0.37803467 | 0.597 | 0.229 | 1.45E-24  | NAA38    | 7 | STMN1_NK-cycling |
| 2017 | 2.11E-50  | 0.37796982 | 0.294 | 0.051 | 4.60E-46  | CTBP2    | 7 | STMN1_NK-cycling |
| 2018 | 8.73E-36  | 0.37781784 | 0.452 | 0.135 | 1.90E-31  | RTN3     | 7 | STMN1_NK-cycling |
| 2019 | 5.09E-83  | 0.37760789 | 0.181 | 0.011 | 1.11E-78  | TIMELESS | 7 | STMN1_NK-cycling |
| 2020 | 2.46E-22  | 0.37681382 | 0.742 | 0.363 | 5.37E-18  | SRSF10   | 7 | STMN1_NK-cycling |
| 2021 | 2.05E-33  | 0.37560409 | 0.359 | 0.098 | 4.47E-29  | KIR2DL1  | 7 | STMN1_NK-cycling |
| 2022 | 4.16E-22  | 0.37401998 | 0.698 | 0.335 | 9.08E-18  | LYAR     | 7 | STMN1_NK-cycling |
| 2023 | 3.39E-25  | 0.37395262 | 0.44  | 0.159 | 7.40E-21  | SDF2L1   | 7 | STMN1_NK-cycling |
| 2024 | 1.03E-42  | 0.37384051 | 0.367 | 0.086 | 2.25E-38  | CBFB     | 7 | STMN1_NK-cycling |
| 2025 | 7.85E-81  | 0.3736509  | 0.29  | 0.033 | 1.71E-76  | CCDC88A  | 7 | STMN1_NK-cycling |
| 2026 | 4.58E-48  | 0.37356403 | 0.315 | 0.061 | 9.99E-44  | TOPBP1   | 7 | STMN1_NK-cycling |
| 2027 | 2.76E-59  | 0.37250362 | 0.194 | 0.02  | 6.03E-55  | LMO7     | 7 | STMN1_NK-cycling |
| 2028 | 8.47E-21  | 0.3723857  | 0.79  | 0.425 | 1.85E-16  | IFI16    | 7 | STMN1_NK-cycling |

|      |           |            |       |       |           |           |   |                  |
|------|-----------|------------|-------|-------|-----------|-----------|---|------------------|
| 2029 | 1.08E-40  | 0.37203441 | 0.161 | 0.021 | 2.35E-36  | HIST1H2AI | 7 | STMN1_NK-cycling |
| 2030 | 1.73E-24  | 0.37091696 | 0.569 | 0.236 | 3.76E-20  | PNRC2     | 7 | STMN1_NK-cycling |
| 2031 | 4.39E-18  | 0.36972128 | 0.899 | 0.633 | 9.57E-14  | C12orf57  | 7 | STMN1_NK-cycling |
| 2032 | 7.28E-29  | 0.36968823 | 0.367 | 0.113 | 1.59E-24  | POP4      | 7 | STMN1_NK-cycling |
| 2033 | 2.80E-25  | 0.36957822 | 0.617 | 0.26  | 6.11E-21  | CACYBP    | 7 | STMN1_NK-cycling |
| 2034 | 5.12E-37  | 0.36838486 | 0.419 | 0.116 | 1.12E-32  | SSRP1     | 7 | STMN1_NK-cycling |
| 2035 | 1.94E-109 | 0.36822932 | 0.23  | 0.014 | 4.23E-105 | PRR11     | 7 | STMN1_NK-cycling |
| 2036 | 1.38E-19  | 0.36710232 | 0.69  | 0.344 | 3.01E-15  | SET       | 7 | STMN1_NK-cycling |
| 2037 | 2.30E-28  | 0.36647204 | 0.496 | 0.177 | 5.02E-24  | FBXL5     | 7 | STMN1_NK-cycling |
| 2038 | 1.16E-27  | 0.36520466 | 0.452 | 0.157 | 2.52E-23  | FDPS      | 7 | STMN1_NK-cycling |
| 2039 | 1.15E-24  | 0.36508476 | 0.508 | 0.199 | 2.51E-20  | FDFT1     | 7 | STMN1_NK-cycling |
| 2040 | 1.01E-87  | 0.36411839 | 0.21  | 0.015 | 2.19E-83  | ZNF367    | 7 | STMN1_NK-cycling |
| 2041 | 3.01E-39  | 0.36362095 | 0.387 | 0.099 | 6.57E-35  | EXOSC8    | 7 | STMN1_NK-cycling |
| 2042 | 1.94E-120 | 0.36289606 | 0.198 | 0.008 | 4.23E-116 | PLK4      | 7 | STMN1_NK-cycling |
| 2043 | 1.42E-36  | 0.3624987  | 0.327 | 0.078 | 3.11E-32  | AKR1C3    | 7 | STMN1_NK-cycling |
| 2044 | 5.00E-25  | 0.36240284 | 0.48  | 0.181 | 1.09E-20  | MED30     | 7 | STMN1_NK-cycling |
| 2045 | 2.16E-22  | 0.36197325 | 0.516 | 0.216 | 4.71E-18  | PTBP1     | 7 | STMN1_NK-cycling |
| 2046 | 1.92E-21  | 0.36163455 | 0.403 | 0.15  | 4.19E-17  | TMEM30A   | 7 | STMN1_NK-cycling |
| 2047 | 9.53E-20  | 0.35897368 | 0.621 | 0.295 | 2.08E-15  | RBBP4     | 7 | STMN1_NK-cycling |
| 2048 | 2.38E-142 | 0.35838118 | 0.21  | 0.007 | 5.18E-138 | KIF18B    | 7 | STMN1_NK-cycling |
| 2049 | 2.13E-21  | 0.3572993  | 0.629 | 0.292 | 4.65E-17  | DSTN      | 7 | STMN1_NK-cycling |
| 2050 | 1.86E-29  | 0.35596057 | 0.403 | 0.126 | 4.06E-25  | RRP7A     | 7 | STMN1_NK-cycling |
| 2051 | 4.86E-19  | 0.35585679 | 0.637 | 0.312 | 1.06E-14  | RNF167    | 7 | STMN1_NK-cycling |
| 2052 | 4.72E-19  | 0.35474449 | 0.798 | 0.43  | 1.03E-14  | YWHAQ     | 7 | STMN1_NK-cycling |
| 2053 | 7.30E-20  | 0.35334749 | 0.94  | 0.571 | 1.59E-15  | PTGES3    | 7 | STMN1_NK-cycling |
| 2054 | 4.28E-18  | 0.35298181 | 0.831 | 0.493 | 9.33E-14  | PPP1CA    | 7 | STMN1_NK-cycling |
| 2055 | 5.92E-22  | 0.35281803 | 0.504 | 0.206 | 1.29E-17  | HNRNPD    | 7 | STMN1_NK-cycling |
| 2056 | 1.10E-09  | 0.35214461 | 0.605 | 0.387 | 2.41E-05  | AREG      | 7 | STMN1_NK-cycling |
| 2057 | 3.82E-20  | 0.35144713 | 0.649 | 0.314 | 8.33E-16  | SUN2      | 7 | STMN1_NK-cycling |
| 2058 | 7.87E-20  | 0.35048691 | 0.75  | 0.37  | 1.72E-15  | ATP5F1    | 7 | STMN1_NK-cycling |
| 2059 | 7.89E-44  | 0.35039096 | 0.343 | 0.075 | 1.72E-39  | CCDC14    | 7 | STMN1_NK-cycling |
| 2060 | 5.03E-40  | 0.34979738 | 0.423 | 0.11  | 1.10E-35  | LAT2      | 7 | STMN1_NK-cycling |
| 2061 | 7.09E-156 | 0.3494167  | 0.202 | 0.005 | 1.55E-151 | RAD51     | 7 | STMN1_NK-cycling |
| 2062 | 6.18E-28  | 0.3484619  | 0.484 | 0.17  | 1.35E-23  | SUMO3     | 7 | STMN1_NK-cycling |
| 2063 | 1.08E-22  | 0.34842692 | 0.601 | 0.255 | 2.35E-18  | ANAPC11   | 7 | STMN1_NK-cycling |
| 2064 | 1.00E-19  | 0.34750139 | 0.657 | 0.318 | 2.19E-15  | PDIA6     | 7 | STMN1_NK-cycling |
| 2065 | 4.51E-19  | 0.34739051 | 0.75  | 0.396 | 9.85E-15  | PKM       | 7 | STMN1_NK-cycling |
| 2066 | 9.30E-54  | 0.34622851 | 0.278 | 0.044 | 2.03E-49  | EMC9      | 7 | STMN1_NK-cycling |
| 2067 | 3.65E-50  | 0.34565104 | 0.306 | 0.056 | 7.96E-46  | CBX1      | 7 | STMN1_NK-cycling |
| 2068 | 1.38E-38  | 0.3454324  | 0.302 | 0.067 | 3.00E-34  | HDGF      | 7 | STMN1_NK-cycling |
| 2069 | 6.91E-20  | 0.34421807 | 0.722 | 0.348 | 1.51E-15  | COX5A     | 7 | STMN1_NK-cycling |
| 2070 | 2.05E-103 | 0.34295452 | 0.202 | 0.011 | 4.47E-99  | RCCD1     | 7 | STMN1_NK-cycling |
| 2071 | 7.21E-33  | 0.34282995 | 0.411 | 0.122 | 1.57E-28  | GPAA1     | 7 | STMN1_NK-cycling |
| 2072 | 2.90E-17  | 0.34264658 | 0.722 | 0.37  | 6.32E-13  | P4HB      | 7 | STMN1_NK-cycling |
| 2073 | 4.23E-22  | 0.3417933  | 0.593 | 0.253 | 9.24E-18  | PTBP3     | 7 | STMN1_NK-cycling |
| 2074 | 6.31E-16  | 0.34112447 | 0.899 | 0.634 | 1.38E-11  | COX6C     | 7 | STMN1_NK-cycling |
| 2075 | 1.44E-25  | 0.34103922 | 0.633 | 0.262 | 3.14E-21  | ITGB1     | 7 | STMN1_NK-cycling |
| 2076 | 4.16E-19  | 0.34091495 | 0.766 | 0.417 | 9.06E-15  | RAC1      | 7 | STMN1_NK-cycling |
| 2077 | 4.78E-19  | 0.34076492 | 0.802 | 0.435 | 1.04E-14  | ATP5J2    | 7 | STMN1_NK-cycling |
| 2078 | 2.09E-69  | 0.340648   | 0.218 | 0.021 | 4.57E-65  | DSN1      | 7 | STMN1_NK-cycling |
| 2079 | 3.26E-137 | 0.34001909 | 0.169 | 0.004 | 7.11E-133 | CDC45     | 7 | STMN1_NK-cycling |
| 2080 | 1.77E-17  | 0.33997903 | 0.665 | 0.336 | 3.85E-13  | PA2G4     | 7 | STMN1_NK-cycling |
| 2081 | 9.25E-31  | 0.33896077 | 0.476 | 0.156 | 2.02E-26  | AP1M1     | 7 | STMN1_NK-cycling |
| 2082 | 1.65E-43  | 0.33805578 | 0.323 | 0.068 | 3.59E-39  | MICB      | 7 | STMN1_NK-cycling |
| 2083 | 8.20E-19  | 0.33705027 | 0.661 | 0.319 | 1.79E-14  | PSMA6     | 7 | STMN1_NK-cycling |
| 2084 | 3.75E-41  | 0.33683459 | 0.375 | 0.091 | 8.17E-37  | G2E3      | 7 | STMN1_NK-cycling |
| 2085 | 8.11E-34  | 0.33631114 | 0.375 | 0.104 | 1.77E-29  | CHRAC1    | 7 | STMN1_NK-cycling |
| 2086 | 6.71E-25  | 0.33578249 | 0.508 | 0.194 | 1.46E-20  | ITGB1BP1  | 7 | STMN1_NK-cycling |
| 2087 | 1.04E-126 | 0.33549777 | 0.181 | 0.006 | 2.27E-122 | FBXO43    | 7 | STMN1_NK-cycling |
| 2088 | 7.40E-104 | 0.3349337  | 0.165 | 0.006 | 1.61E-99  | WDR62     | 7 | STMN1_NK-cycling |
| 2089 | 3.47E-25  | 0.33479904 | 0.383 | 0.128 | 7.57E-21  | NDE1      | 7 | STMN1_NK-cycling |
| 2090 | 2.48E-131 | 0.3347405  | 0.19  | 0.006 | 5.40E-127 | SPC24     | 7 | STMN1_NK-cycling |
| 2091 | 1.22E-48  | 0.3338976  | 0.234 | 0.035 | 2.65E-44  | PALLD     | 7 | STMN1_NK-cycling |
| 2092 | 5.59E-30  | 0.33385268 | 0.565 | 0.202 | 1.22E-25  | UBE2A     | 7 | STMN1_NK-cycling |
| 2093 | 2.51E-21  | 0.333755   | 0.645 | 0.302 | 5.47E-17  | LINC00152 | 7 | STMN1_NK-cycling |
| 2094 | 3.42E-34  | 0.33298116 | 0.206 | 0.038 | 7.47E-30  | MCM6      | 7 | STMN1_NK-cycling |
| 2095 | 1.07E-33  | 0.33297255 | 0.238 | 0.05  | 2.33E-29  | FGFR1OP   | 7 | STMN1_NK-cycling |
| 2096 | 2.02E-26  | 0.33260816 | 0.633 | 0.257 | 4.41E-22  | KIF2A     | 7 | STMN1_NK-cycling |
| 2097 | 1.52E-31  | 0.33095281 | 0.306 | 0.08  | 3.31E-27  | TMEM18    | 7 | STMN1_NK-cycling |
| 2098 | 2.45E-19  | 0.33028593 | 0.528 | 0.23  | 5.35E-15  | TAF15     | 7 | STMN1_NK-cycling |

|      |           |            |       |       |           |           |   |                  |
|------|-----------|------------|-------|-------|-----------|-----------|---|------------------|
| 2099 | 4.52E-16  | 0.32957471 | 0.843 | 0.533 | 9.86E-12  | HSP90B1   | 7 | STMN1_NK-cycling |
| 2100 | 4.67E-69  | 0.32889899 | 0.173 | 0.013 | 1.02E-64  | MFGE8     | 7 | STMN1_NK-cycling |
| 2101 | 2.97E-28  | 0.32767569 | 0.375 | 0.115 | 6.49E-24  | IMPDH2    | 7 | STMN1_NK-cycling |
| 2102 | 1.10E-47  | 0.32758432 | 0.21  | 0.029 | 2.41E-43  | SLC1A4    | 7 | STMN1_NK-cycling |
| 2103 | 1.85E-26  | 0.32641461 | 0.524 | 0.194 | 4.02E-22  | PRDX3     | 7 | STMN1_NK-cycling |
| 2104 | 4.54E-18  | 0.32633275 | 0.996 | 0.91  | 9.89E-14  | MYL12A    | 7 | STMN1_NK-cycling |
| 2105 | 6.21E-88  | 0.3252152  | 0.19  | 0.012 | 1.35E-83  | RFC3      | 7 | STMN1_NK-cycling |
| 2106 | 1.74E-33  | 0.32366741 | 0.339 | 0.089 | 3.80E-29  | MPST      | 7 | STMN1_NK-cycling |
| 2107 | 1.14E-53  | 0.32330843 | 0.185 | 0.02  | 2.49E-49  | DPYSL2    | 7 | STMN1_NK-cycling |
| 2108 | 2.23E-42  | 0.32212468 | 0.177 | 0.024 | 4.86E-38  | HIST1H2AL | 7 | STMN1_NK-cycling |
| 2109 | 9.87E-74  | 0.32205307 | 0.185 | 0.014 | 2.15E-69  | RTKN2     | 7 | STMN1_NK-cycling |
| 2110 | 1.13E-20  | 0.32167416 | 0.637 | 0.289 | 2.46E-16  | PSMD8     | 7 | STMN1_NK-cycling |
| 2111 | 4.10E-21  | 0.32152296 | 0.399 | 0.151 | 8.95E-17  | TIPRL     | 7 | STMN1_NK-cycling |
| 2112 | 6.34E-98  | 0.32096334 | 0.185 | 0.009 | 1.38E-93  | FAM72B    | 7 | STMN1_NK-cycling |
| 2113 | 5.89E-21  | 0.32085066 | 0.532 | 0.227 | 1.28E-16  | EIF4E     | 7 | STMN1_NK-cycling |
| 2114 | 1.19E-25  | 0.32076067 | 0.472 | 0.168 | 2.60E-21  | RECQL     | 7 | STMN1_NK-cycling |
| 2115 | 4.54E-16  | 0.3207452  | 0.762 | 0.413 | 9.91E-12  | EIF5A     | 7 | STMN1_NK-cycling |
| 2116 | 3.61E-87  | 0.32064828 | 0.185 | 0.011 | 7.88E-83  | CHEK1     | 7 | STMN1_NK-cycling |
| 2117 | 4.72E-17  | 0.32044045 | 0.98  | 0.821 | 1.03E-12  | GZMA      | 7 | STMN1_NK-cycling |
| 2118 | 3.45E-39  | 0.32043065 | 0.315 | 0.07  | 7.51E-35  | ANKRD36C  | 7 | STMN1_NK-cycling |
| 2119 | 9.29E-27  | 0.32020039 | 0.359 | 0.112 | 2.03E-22  | HENMT1    | 7 | STMN1_NK-cycling |
| 2120 | 3.61E-22  | 0.32017016 | 0.593 | 0.248 | 7.87E-18  | RAB11A    | 7 | STMN1_NK-cycling |
| 2121 | 6.22E-44  | 0.31981099 | 0.246 | 0.042 | 1.36E-39  | CDCA4     | 7 | STMN1_NK-cycling |
| 2122 | 5.74E-31  | 0.31946782 | 0.319 | 0.085 | 1.25E-26  | ARMC1     | 7 | STMN1_NK-cycling |
| 2123 | 2.15E-35  | 0.31847836 | 0.363 | 0.094 | 4.69E-31  | CCDC82    | 7 | STMN1_NK-cycling |
| 2124 | 2.64E-21  | 0.31841813 | 0.69  | 0.312 | 5.76E-17  | SNRPF     | 7 | STMN1_NK-cycling |
| 2125 | 1.97E-26  | 0.31827119 | 0.367 | 0.116 | 4.31E-22  | ANXA4     | 7 | STMN1_NK-cycling |
| 2126 | 1.08E-42  | 0.31813852 | 0.206 | 0.031 | 2.36E-38  | CDK2      | 7 | STMN1_NK-cycling |
| 2127 | 1.58E-17  | 0.31794428 | 0.851 | 0.495 | 3.45E-13  | RBM8A     | 7 | STMN1_NK-cycling |
| 2128 | 6.03E-24  | 0.31693986 | 0.282 | 0.083 | 1.31E-19  | NABP2     | 7 | STMN1_NK-cycling |
| 2129 | 1.18E-49  | 0.31597298 | 0.202 | 0.026 | 2.57E-45  | C19orf48  | 7 | STMN1_NK-cycling |
| 2130 | 3.13E-64  | 0.31508513 | 0.218 | 0.023 | 6.84E-60  | MIS18A    | 7 | STMN1_NK-cycling |
| 2131 | 1.27E-18  | 0.31483332 | 0.629 | 0.298 | 2.78E-14  | MYO1G     | 7 | STMN1_NK-cycling |
| 2132 | 8.22E-69  | 0.3142841  | 0.149 | 0.009 | 1.79E-64  | HIST1H2AH | 7 | STMN1_NK-cycling |
| 2133 | 1.81E-30  | 0.31370427 | 0.335 | 0.092 | 3.94E-26  | ATL3      | 7 | STMN1_NK-cycling |
| 2134 | 6.77E-86  | 0.31219712 | 0.198 | 0.013 | 1.48E-81  | MTRFR2    | 7 | STMN1_NK-cycling |
| 2135 | 2.40E-25  | 0.31208037 | 0.379 | 0.125 | 5.24E-21  | KATNBL1   | 7 | STMN1_NK-cycling |
| 2136 | 1.66E-57  | 0.31203933 | 0.202 | 0.023 | 3.61E-53  | BORA      | 7 | STMN1_NK-cycling |
| 2137 | 2.45E-21  | 0.31195734 | 0.653 | 0.286 | 5.34E-17  | MAGOH     | 7 | STMN1_NK-cycling |
| 2138 | 2.09E-37  | 0.31123835 | 0.306 | 0.07  | 4.56E-33  | ACTL6A    | 7 | STMN1_NK-cycling |
| 2139 | 4.80E-55  | 0.3101391  | 0.206 | 0.024 | 1.05E-50  | MASTL     | 7 | STMN1_NK-cycling |
| 2140 | 2.47E-114 | 0.3099152  | 0.169 | 0.006 | 5.38E-110 | TRIP13    | 7 | STMN1_NK-cycling |
| 2141 | 6.22E-14  | 0.3097598  | 0.883 | 0.596 | 1.36E-09  | TAGLN2    | 7 | STMN1_NK-cycling |
| 2142 | 1.93E-67  | 0.30970312 | 0.181 | 0.015 | 4.21E-63  | CENPJ     | 7 | STMN1_NK-cycling |
| 2143 | 2.06E-45  | 0.3090827  | 0.262 | 0.045 | 4.49E-41  | KLRC4     | 7 | STMN1_NK-cycling |
| 2144 | 1.60E-37  | 0.30753564 | 0.21  | 0.036 | 3.49E-33  | FDXR      | 7 | STMN1_NK-cycling |
| 2145 | 5.12E-23  | 0.30720738 | 0.387 | 0.136 | 1.12E-18  | SUPT16H   | 7 | STMN1_NK-cycling |
| 2146 | 2.06E-26  | 0.30711597 | 0.435 | 0.148 | 4.49E-22  | FAM195B   | 7 | STMN1_NK-cycling |
| 2147 | 3.32E-17  | 0.30656039 | 0.46  | 0.201 | 7.24E-13  | ANXA5     | 7 | STMN1_NK-cycling |
| 2148 | 5.26E-15  | 0.30465685 | 0.754 | 0.442 | 1.15E-10  | UXT       | 7 | STMN1_NK-cycling |
| 2149 | 3.10E-62  | 0.30465344 | 0.21  | 0.022 | 6.76E-58  | RNF26     | 7 | STMN1_NK-cycling |
| 2150 | 2.03E-32  | 0.30446695 | 0.298 | 0.074 | 4.42E-28  | IMMP1L    | 7 | STMN1_NK-cycling |
| 2151 | 8.17E-20  | 0.30404131 | 0.544 | 0.235 | 1.78E-15  | GTF2A2    | 7 | STMN1_NK-cycling |
| 2152 | 8.17E-40  | 0.30389644 | 0.315 | 0.069 | 1.78E-35  | ODF2      | 7 | STMN1_NK-cycling |
| 2153 | 8.02E-23  | 0.30372445 | 0.407 | 0.146 | 1.75E-18  | BAZ1B     | 7 | STMN1_NK-cycling |
| 2154 | 1.11E-21  | 0.30274292 | 0.375 | 0.135 | 2.41E-17  | NUDCD2    | 7 | STMN1_NK-cycling |
| 2155 | 7.02E-34  | 0.30273499 | 0.294 | 0.07  | 1.53E-29  | RAD51C    | 7 | STMN1_NK-cycling |
| 2156 | 4.97E-21  | 0.30250661 | 0.411 | 0.154 | 1.08E-16  | RNASEH2B  | 7 | STMN1_NK-cycling |
| 2157 | 1.26E-20  | 0.30249033 | 0.448 | 0.177 | 2.74E-16  | NUDT21    | 7 | STMN1_NK-cycling |
| 2158 | 1.37E-25  | 0.30231637 | 0.452 | 0.158 | 3.00E-21  | VBP1      | 7 | STMN1_NK-cycling |
| 2159 | 6.12E-16  | 0.30178956 | 0.69  | 0.348 | 1.33E-11  | CSNK2B    | 7 | STMN1_NK-cycling |
| 2160 | 1.22E-15  | 0.30092788 | 0.569 | 0.275 | 2.66E-11  | HSD17B11  | 7 | STMN1_NK-cycling |
| 2161 | 8.46E-23  | 0.30069513 | 0.492 | 0.189 | 1.85E-18  | CMC2      | 7 | STMN1_NK-cycling |
| 2162 | 8.49E-30  | 0.30029322 | 0.302 | 0.08  | 1.85E-25  | CCDC167   | 7 | STMN1_NK-cycling |
| 2163 | 1.92E-29  | 0.30020039 | 0.343 | 0.098 | 4.19E-25  | COMMD4    | 7 | STMN1_NK-cycling |
| 2164 | 2.04E-15  | 0.29939021 | 0.915 | 0.6   | 4.44E-11  | COX6A1    | 7 | STMN1_NK-cycling |
| 2165 | 2.67E-22  | 0.29765052 | 0.536 | 0.215 | 5.82E-18  | AP2S1     | 7 | STMN1_NK-cycling |
| 2166 | 7.21E-25  | 0.29741495 | 0.367 | 0.12  | 1.57E-20  | STIP1     | 7 | STMN1_NK-cycling |
| 2167 | 3.37E-24  | 0.29708377 | 0.427 | 0.152 | 7.34E-20  | IFI6      | 7 | STMN1_NK-cycling |
| 2168 | 5.51E-23  | 0.29615029 | 0.573 | 0.232 | 1.20E-18  | CCT2      | 7 | STMN1_NK-cycling |



|      |           |            |       |       |           |               |   |                  |
|------|-----------|------------|-------|-------|-----------|---------------|---|------------------|
| 2169 | 2.21E-46  | 0.29605511 | 0.214 | 0.031 | 4.81E-42  | DHRS4L2       | 7 | STMN1_NK-cycling |
| 2170 | 5.22E-15  | 0.29601386 | 0.754 | 0.423 | 1.14E-10  | BAX           | 7 | STMN1_NK-cycling |
| 2171 | 7.99E-31  | 0.29591746 | 0.371 | 0.107 | 1.74E-26  | NELFE         | 7 | STMN1_NK-cycling |
| 2172 | 5.28E-52  | 0.29589104 | 0.198 | 0.024 | 1.15E-47  | DRAXIN        | 7 | STMN1_NK-cycling |
| 2173 | 6.18E-81  | 0.29586719 | 0.161 | 0.009 | 1.35E-76  | SMTN          | 7 | STMN1_NK-cycling |
| 2174 | 2.88E-14  | 0.295867   | 0.871 | 0.581 | 6.28E-10  | COX7A2        | 7 | STMN1_NK-cycling |
| 2175 | 1.76E-40  | 0.29559295 | 0.27  | 0.053 | 3.84E-36  | SLFN13        | 7 | STMN1_NK-cycling |
| 2176 | 6.74E-46  | 0.2953913  | 0.258 | 0.044 | 1.47E-41  | ALDH16A1      | 7 | STMN1_NK-cycling |
| 2177 | 1.15E-36  | 0.29518751 | 0.323 | 0.076 | 2.50E-32  | TESC          | 7 | STMN1_NK-cycling |
| 2178 | 1.34E-17  | 0.29496261 | 0.661 | 0.328 | 2.93E-13  | RBX1          | 7 | STMN1_NK-cycling |
| 2179 | 1.01E-24  | 0.29482729 | 0.335 | 0.105 | 2.20E-20  | IKBIP         | 7 | STMN1_NK-cycling |
| 2180 | 1.25E-57  | 0.29402535 | 0.202 | 0.022 | 2.73E-53  | DDX11         | 7 | STMN1_NK-cycling |
| 2181 | 6.93E-57  | 0.29373146 | 0.198 | 0.022 | 1.51E-52  | ARHGAP19      | 7 | STMN1_NK-cycling |
| 2182 | 1.74E-59  | 0.29336061 | 0.141 | 0.01  | 3.80E-55  | MCM2          | 7 | STMN1_NK-cycling |
| 2183 | 9.39E-40  | 0.29320099 | 0.23  | 0.041 | 2.05E-35  | RHNO1         | 7 | STMN1_NK-cycling |
| 2184 | 2.39E-24  | 0.29308342 | 0.274 | 0.078 | 5.20E-20  | KIR3DL2       | 7 | STMN1_NK-cycling |
| 2185 | 9.02E-33  | 0.29307474 | 0.294 | 0.072 | 1.97E-28  | METTLL10      | 7 | STMN1_NK-cycling |
| 2186 | 7.36E-17  | 0.29291593 | 0.649 | 0.323 | 1.60E-12  | KPNB1         | 7 | STMN1_NK-cycling |
| 2187 | 5.86E-47  | 0.29230086 | 0.19  | 0.024 | 1.28E-42  | CCP110        | 7 | STMN1_NK-cycling |
| 2188 | 3.50E-14  | 0.29204585 | 0.77  | 0.454 | 7.63E-10  | PSMA7         | 7 | STMN1_NK-cycling |
| 2189 | 4.09E-15  | 0.29189375 | 0.976 | 0.801 | 8.92E-11  | CORO1A        | 7 | STMN1_NK-cycling |
| 2190 | 3.35E-111 | 0.29132979 | 0.153 | 0.004 | 7.31E-107 | RAD54L        | 7 | STMN1_NK-cycling |
| 2191 | 7.57E-44  | 0.29094672 | 0.214 | 0.033 | 1.65E-39  | NCAPH2        | 7 | STMN1_NK-cycling |
| 2192 | 8.65E-20  | 0.28998928 | 0.399 | 0.152 | 1.89E-15  | ARL6IP6       | 7 | STMN1_NK-cycling |
| 2193 | 1.21E-19  | 0.28974538 | 0.435 | 0.173 | 2.65E-15  | ELAVL1        | 7 | STMN1_NK-cycling |
| 2194 | 1.29E-100 | 0.28937503 | 0.19  | 0.009 | 2.81E-96  | GEN1          | 7 | STMN1_NK-cycling |
| 2195 | 5.01E-55  | 0.28930905 | 0.19  | 0.021 | 1.09E-50  | POLD1         | 7 | STMN1_NK-cycling |
| 2196 | 3.75E-85  | 0.28879483 | 0.141 | 0.006 | 8.17E-81  | GINS2         | 7 | STMN1_NK-cycling |
| 2197 | 5.01E-66  | 0.28853062 | 0.202 | 0.019 | 1.09E-61  | RFC5          | 7 | STMN1_NK-cycling |
| 2198 | 1.33E-69  | 0.28811582 | 0.169 | 0.012 | 2.91E-65  | CENPO         | 7 | STMN1_NK-cycling |
| 2199 | 5.37E-26  | 0.28786555 | 0.335 | 0.102 | 1.17E-21  | NCAM1         | 7 | STMN1_NK-cycling |
| 2200 | 2.66E-80  | 0.28748075 | 0.161 | 0.009 | 5.81E-76  | CIT           | 7 | STMN1_NK-cycling |
| 2201 | 1.44E-17  | 0.28733964 | 0.665 | 0.326 | 3.15E-13  | NDUFB4        | 7 | STMN1_NK-cycling |
| 2202 | 1.25E-18  | 0.28727934 | 0.528 | 0.228 | 2.72E-14  | SSNA1         | 7 | STMN1_NK-cycling |
| 2203 | 4.24E-20  | 0.28533472 | 0.536 | 0.22  | 9.24E-16  | RAB8A         | 7 | STMN1_NK-cycling |
| 2204 | 1.57E-21  | 0.2850232  | 0.524 | 0.212 | 3.43E-17  | LUC7L2        | 7 | STMN1_NK-cycling |
| 2205 | 3.98E-31  | 0.28449949 | 0.315 | 0.082 | 8.69E-27  | DESI2         | 7 | STMN1_NK-cycling |
| 2206 | 2.70E-28  | 0.28443252 | 0.298 | 0.08  | 5.89E-24  | PDLIM1        | 7 | STMN1_NK-cycling |
| 2207 | 6.88E-62  | 0.28414343 | 0.161 | 0.013 | 1.50E-57  | FANCD2        | 7 | STMN1_NK-cycling |
| 2208 | 3.52E-49  | 0.28295731 | 0.169 | 0.019 | 7.69E-45  | FANCG         | 7 | STMN1_NK-cycling |
| 2209 | 2.44E-75  | 0.2825508  | 0.157 | 0.009 | 5.32E-71  | C1orf112      | 7 | STMN1_NK-cycling |
| 2210 | 4.77E-48  | 0.28216893 | 0.181 | 0.022 | 1.04E-43  | CENPQ         | 7 | STMN1_NK-cycling |
| 2211 | 4.46E-22  | 0.28190654 | 0.46  | 0.174 | 9.72E-18  | UQCRC1        | 7 | STMN1_NK-cycling |
| 2212 | 1.33E-15  | 0.28187493 | 0.661 | 0.338 | 2.90E-11  | SFPQ          | 7 | STMN1_NK-cycling |
| 2213 | 2.09E-32  | 0.28180621 | 0.202 | 0.038 | 4.56E-28  | SLC43A3       | 7 | STMN1_NK-cycling |
| 2214 | 1.05E-14  | 0.28152199 | 0.94  | 0.775 | 2.28E-10  | PCBP2         | 7 | STMN1_NK-cycling |
| 2215 | 3.63E-20  | 0.2815139  | 0.512 | 0.209 | 7.92E-16  | SNRPC         | 7 | STMN1_NK-cycling |
| 2216 | 2.68E-16  | 0.28129542 | 0.685 | 0.342 | 5.84E-12  | ATP5C1        | 7 | STMN1_NK-cycling |
| 2217 | 2.64E-74  | 0.28072542 | 0.194 | 0.015 | 5.75E-70  | HAUS8         | 7 | STMN1_NK-cycling |
| 2218 | 4.70E-13  | 0.28028805 | 0.927 | 0.689 | 1.03E-08  | PCBP1         | 7 | STMN1_NK-cycling |
| 2219 | 5.46E-23  | 0.28017621 | 0.448 | 0.163 | 1.19E-18  | RNASEH2C      | 7 | STMN1_NK-cycling |
| 2220 | 2.05E-20  | 0.27990271 | 0.423 | 0.163 | 4.48E-16  | TMEM71        | 7 | STMN1_NK-cycling |
| 2221 | 2.47E-65  | 0.27972019 | 0.149 | 0.01  | 5.38E-61  | CENPP         | 7 | STMN1_NK-cycling |
| 2222 | 2.26E-65  | 0.27941327 | 0.157 | 0.011 | 4.93E-61  | MCM4          | 7 | STMN1_NK-cycling |
| 2223 | 2.47E-28  | 0.27939502 | 0.254 | 0.062 | 5.38E-24  | HAUS1         | 7 | STMN1_NK-cycling |
| 2224 | 2.97E-35  | 0.27933669 | 0.206 | 0.037 | 6.48E-31  | APOLD1        | 7 | STMN1_NK-cycling |
| 2225 | 3.22E-43  | 0.27847305 | 0.165 | 0.02  | 7.02E-39  | WDR76         | 7 | STMN1_NK-cycling |
| 2226 | 1.51E-17  | 0.27845189 | 0.633 | 0.301 | 3.29E-13  | RASSF1        | 7 | STMN1_NK-cycling |
| 2227 | 1.65E-34  | 0.27775049 | 0.214 | 0.039 | 3.59E-30  | TSPAN2        | 7 | STMN1_NK-cycling |
| 2228 | 7.63E-25  | 0.27765321 | 0.379 | 0.124 | 1.66E-20  | PRPS1         | 7 | STMN1_NK-cycling |
| 2229 | 3.92E-15  | 0.27739334 | 0.613 | 0.305 | 8.54E-11  | NDUFA12       | 7 | STMN1_NK-cycling |
| 2230 | 1.19E-23  | 0.27717327 | 0.31  | 0.096 | 2.59E-19  | CDC27         | 7 | STMN1_NK-cycling |
| 2231 | 3.90E-18  | 0.27681201 | 0.577 | 0.265 | 8.51E-14  | KLRC3         | 7 | STMN1_NK-cycling |
| 2232 | 3.31E-45  | 0.27659803 | 0.226 | 0.035 | 7.21E-41  | MGME1         | 7 | STMN1_NK-cycling |
| 2233 | 8.95E-26  | 0.27652493 | 0.387 | 0.125 | 1.95E-21  | CEP78         | 7 | STMN1_NK-cycling |
| 2234 | 2.03E-37  | 0.27621306 | 0.266 | 0.054 | 4.44E-33  | ASCL2         | 7 | STMN1_NK-cycling |
| 2235 | 6.27E-76  | 0.27619836 | 0.181 | 0.013 | 1.37E-71  | ATP8B3        | 7 | STMN1_NK-cycling |
| 2236 | 1.79E-52  | 0.276096   | 0.222 | 0.029 | 3.90E-48  | RP11-545E17.3 | 7 | STMN1_NK-cycling |
| 2237 | 3.00E-51  | 0.27599212 | 0.177 | 0.02  | 6.53E-47  | ZNF714        | 7 | STMN1_NK-cycling |
| 2238 | 4.94E-16  | 0.27596744 | 0.984 | 0.858 | 1.08E-11  | HNRNPA1       | 7 | STMN1_NK-cycling |

|      |           |            |       |       |             |               |   |                  |
|------|-----------|------------|-------|-------|-------------|---------------|---|------------------|
| 2239 | 4.53E-13  | 0.27540293 | 0.964 | 0.883 | 9.87E-09    | IFITM2        | 7 | STMN1_NK-cycling |
| 2240 | 9.19E-20  | 0.27378029 | 0.27  | 0.086 | 2.00E-15    | KIR2DL3       | 7 | STMN1_NK-cycling |
| 2241 | 5.16E-29  | 0.27310557 | 0.246 | 0.058 | 1.12E-24    | SLC25A40      | 7 | STMN1_NK-cycling |
| 2242 | 2.26E-12  | 0.27236686 | 0.746 | 0.441 | 4.92E-08    | PSME2         | 7 | STMN1_NK-cycling |
| 2243 | 2.33E-36  | 0.27121805 | 0.222 | 0.041 | 5.08E-32    | CRAT          | 7 | STMN1_NK-cycling |
| 2244 | 1.94E-13  | 0.27108013 | 0.738 | 0.429 | 4.22E-09    | ANXA6         | 7 | STMN1_NK-cycling |
| 2245 | 1.30E-24  | 0.27062447 | 0.359 | 0.114 | 2.83E-20    | RP11-25K19.1  | 7 | STMN1_NK-cycling |
| 2246 | 1.07E-22  | 0.27062167 | 0.383 | 0.132 | 2.32E-18    | SLC1A5        | 7 | STMN1_NK-cycling |
| 2247 | 1.96E-16  | 0.27035719 | 0.544 | 0.257 | 4.28E-12    | ZNF706        | 7 | STMN1_NK-cycling |
| 2248 | 3.24E-15  | 0.27030929 | 0.633 | 0.32  | 7.08E-11    | ADD3          | 7 | STMN1_NK-cycling |
| 2249 | 5.24E-21  | 0.27029853 | 0.456 | 0.177 | 1.14E-16    | ARPP19        | 7 | STMN1_NK-cycling |
| 2250 | 3.61E-19  | 0.2696628  | 0.46  | 0.189 | 7.87E-15    | BTG3          | 7 | STMN1_NK-cycling |
| 2251 | 6.07E-44  | 0.26857535 | 0.198 | 0.028 | 1.32E-39    | XRCC6BP1      | 7 | STMN1_NK-cycling |
| 2252 | 6.53E-19  | 0.2680285  | 0.629 | 0.29  | 1.42E-14    | GLUL          | 7 | STMN1_NK-cycling |
| 2253 | 5.53E-41  | 0.26775415 | 0.185 | 0.027 | 1.21E-36    | HYI           | 7 | STMN1_NK-cycling |
| 2254 | 4.31E-76  | 0.26754564 | 0.149 | 0.008 | 9.40E-72    | DSCC1         | 7 | STMN1_NK-cycling |
| 2255 | 2.98E-17  | 0.26752915 | 0.552 | 0.25  | 6.49E-13    | NAPA          | 7 | STMN1_NK-cycling |
| 2256 | 2.21E-49  | 0.26649464 | 0.194 | 0.024 | 4.83E-45    | COQ2          | 7 | STMN1_NK-cycling |
| 2257 | 2.27E-33  | 0.26604182 | 0.234 | 0.048 | 4.94E-29    | SCD5          | 7 | STMN1_NK-cycling |
| 2258 | 2.19E-23  | 0.26600255 | 0.464 | 0.17  | 4.77E-19    | U2AF1         | 7 | STMN1_NK-cycling |
| 2259 | 2.14E-37  | 0.26593459 | 0.218 | 0.039 | 4.67E-33    | TEX30         | 7 | STMN1_NK-cycling |
| 2260 | 4.02E-28  | 0.26586539 | 0.339 | 0.097 | 8.77E-24    | TMEM14A       | 7 | STMN1_NK-cycling |
| 2261 | 1.54E-102 | 0.26526575 | 0.137 | 0.004 | 3.37E-98    | MCM10         | 7 | STMN1_NK-cycling |
| 2262 | 3.66E-23  | 0.26524094 | 0.367 | 0.123 | 7.97E-19    | TFDP2         | 7 | STMN1_NK-cycling |
| 2263 | 3.85E-13  | 0.2645646  | 0.681 | 0.388 | 8.40E-09    | CAST          | 7 | STMN1_NK-cycling |
| 2264 | 2.53E-09  | 0.26450909 | 0.81  | 0.536 | 5.51E-05    | CALR          | 7 | STMN1_NK-cycling |
| 2265 | 6.00E-18  | 0.26450111 | 0.516 | 0.224 | 1.31E-13    | KRAS          | 7 | STMN1_NK-cycling |
| 2266 | 5.12E-21  | 0.26446667 | 0.456 | 0.175 | 1.12E-16    | FAM96A        | 7 | STMN1_NK-cycling |
| 2267 | 7.65E-26  | 0.26435687 | 0.375 | 0.119 | 1.67E-21    | MPC1          | 7 | STMN1_NK-cycling |
| 2268 | 1.33E-40  | 0.26433968 | 0.173 | 0.024 | 2.90E-36    | CEP57L1       | 7 | STMN1_NK-cycling |
| 2269 | 5.80E-13  | 0.26431157 | 0.673 | 0.362 | 1.26E-08    | UQCRQ         | 7 | STMN1_NK-cycling |
| 2270 | 4.87E-37  | 0.26400125 | 0.185 | 0.029 | 1.06E-32    | RBBP8         | 7 | STMN1_NK-cycling |
| 2271 | 3.72E-12  | 0.26366481 | 0.891 | 0.649 | 8.11E-08    | TPM3          | 7 | STMN1_NK-cycling |
| 2272 | 5.34E-23  | 0.26320825 | 0.411 | 0.144 | 1.17E-18    | DCP2          | 7 | STMN1_NK-cycling |
| 2273 | 4.88E-22  | 0.26220621 | 0.302 | 0.095 | 1.06E-17    | HPS3          | 7 | STMN1_NK-cycling |
| 2274 | 7.06E-31  | 0.26220379 | 0.274 | 0.066 | 1.54E-26    | NNT           | 7 | STMN1_NK-cycling |
| 2275 | 1.71E-30  | 0.26212271 | 0.222 | 0.047 | 3.74E-26    | TUBGCP3       | 7 | STMN1_NK-cycling |
| 2276 | 7.65E-14  | 0.26148768 | 0.641 | 0.343 | 1.67E-09    | PLAC8         | 7 | STMN1_NK-cycling |
| 2277 | 6.52E-30  | 0.26141744 | 0.141 | 0.022 | 1.42E-25    | IP11-386G11.1 | 7 | STMN1_NK-cycling |
| 2278 | 4.76E-36  | 0.26134958 | 0.19  | 0.031 | 1.04E-31    | UBL7-AS1      | 7 | STMN1_NK-cycling |
| 2279 | 6.86E-22  | 0.26107757 | 0.363 | 0.125 | 1.50E-17    | FAM200B       | 7 | STMN1_NK-cycling |
| 2280 | 8.06E-20  | 0.26105949 | 0.343 | 0.122 | 1.76E-15    | PHTF2         | 7 | STMN1_NK-cycling |
| 2281 | 2.40E-22  | 0.26089053 | 0.355 | 0.119 | 5.23E-18    | HCFC1R1       | 7 | STMN1_NK-cycling |
| 2282 | 4.43E-17  | 0.26075558 | 0.508 | 0.226 | 9.67E-13    | TCP1          | 7 | STMN1_NK-cycling |
| 2283 | 9.24E-16  | 0.25983771 | 0.573 | 0.268 | 2.02E-11    | POLR2K        | 7 | STMN1_NK-cycling |
| 2284 | 2.53E-20  | 0.25926909 | 0.444 | 0.17  | 5.52E-16    | MAPRE1        | 7 | STMN1_NK-cycling |
| 2285 | 1.83E-79  | 0.25871933 | 0.149 | 0.008 | 3.99E-75    | POLQ          | 7 | STMN1_NK-cycling |
| 2286 | 1.42E-19  | 0.25867727 | 0.597 | 0.257 | 3.11E-15    | UQCRFS1       | 7 | STMN1_NK-cycling |
| 2287 | 5.42E-12  | 0.25853815 | 0.871 | 0.583 | 1.18E-07    | SLC25A3       | 7 | STMN1_NK-cycling |
| 2288 | 9.16E-19  | 0.25845356 | 0.395 | 0.153 | 2.00E-14    | CYB5B         | 7 | STMN1_NK-cycling |
| 2289 | 2.14E-18  | 0.25829838 | 0.484 | 0.202 | 4.67E-14    | SNRPA         | 7 | STMN1_NK-cycling |
| 2290 | 2.15E-22  | 0.25822579 | 0.339 | 0.112 | 4.69E-18    | DAZAP1        | 7 | STMN1_NK-cycling |
| 2291 | 8.23E-26  | 0.25814064 | 0.274 | 0.075 | 1.79E-21    | HACD3         | 7 | STMN1_NK-cycling |
| 2292 | 8.71E-09  | 0.25810511 | 0.649 | 0.416 | 0.000189999 | WSB1          | 7 | STMN1_NK-cycling |
| 2293 | 7.16E-34  | 0.25740238 | 0.161 | 0.024 | 1.56E-29    | BLM           | 7 | STMN1_NK-cycling |
| 2294 | 1.11E-17  | 0.25703925 | 0.31  | 0.113 | 2.42E-13    | HLA-DMA       | 7 | STMN1_NK-cycling |
| 2295 | 1.71E-16  | 0.25676484 | 0.46  | 0.199 | 3.73E-12    | TMX1          | 7 | STMN1_NK-cycling |
| 2296 | 7.03E-28  | 0.25661593 | 0.52  | 0.18  | 1.53E-23    | SH2D1B        | 7 | STMN1_NK-cycling |
| 2297 | 7.73E-34  | 0.25620389 | 0.262 | 0.057 | 1.68E-29    | HMGXB4        | 7 | STMN1_NK-cycling |
| 2298 | 6.93E-75  | 0.25620293 | 0.125 | 0.005 | 1.51E-70    | CDC6          | 7 | STMN1_NK-cycling |
| 2299 | 3.99E-23  | 0.25617409 | 0.25  | 0.07  | 8.71E-19    | HLTF          | 7 | STMN1_NK-cycling |
| 2300 | 4.27E-14  | 0.25609079 | 0.738 | 0.401 | 9.31E-10    | SPCS2         | 7 | STMN1_NK-cycling |
| 2301 | 1.46E-26  | 0.25560504 | 0.315 | 0.09  | 3.18E-22    | PSMA2         | 7 | STMN1_NK-cycling |
| 2302 | 7.68E-70  | 0.25515536 | 0.19  | 0.016 | 1.67E-65    | SUV39H1       | 7 | STMN1_NK-cycling |
| 2303 | 1.18E-11  | 0.25491851 | 0.718 | 0.435 | 2.58E-07    | HLA-DPB1      | 7 | STMN1_NK-cycling |
| 2304 | 6.20E-72  | 0.25454984 | 0.145 | 0.008 | 1.35E-67    | OIP5          | 7 | STMN1_NK-cycling |
| 2305 | 3.16E-48  | 0.25449235 | 0.161 | 0.017 | 6.89E-44    | CEP85         | 7 | STMN1_NK-cycling |
| 2306 | 4.15E-24  | 0.25402837 | 0.278 | 0.079 | 9.04E-20    | APLP2         | 7 | STMN1_NK-cycling |
| 2307 | 1.98E-10  | 0.25379134 | 0.911 | 0.672 | 4.32E-06    | CHCHD2        | 7 | STMN1_NK-cycling |
| 2308 | 2.84E-15  | 0.25367    | 0.387 | 0.165 | 6.19E-11    | PRKDC         | 7 | STMN1_NK-cycling |

|      |          |             |       |       |             |           |   |                  |
|------|----------|-------------|-------|-------|-------------|-----------|---|------------------|
| 2309 | 8.31E-28 | 0.25359874  | 0.202 | 0.043 | 1.81E-23    | TFDP1     | 7 | STMN1_NK-cycling |
| 2310 | 3.41E-19 | 0.25275148  | 0.351 | 0.127 | 7.44E-15    | GUSB      | 7 | STMN1_NK-cycling |
| 2311 | 7.59E-21 | 0.25242055  | 0.27  | 0.084 | 1.66E-16    | TPGS2     | 7 | STMN1_NK-cycling |
| 2312 | 1.03E-19 | 0.25160526  | 0.327 | 0.114 | 2.24E-15    | RANGRF    | 7 | STMN1_NK-cycling |
| 2313 | 2.67E-19 | 0.25114882  | 0.496 | 0.202 | 5.83E-15    | NDUFB6    | 7 | STMN1_NK-cycling |
| 2314 | 2.66E-13 | 0.25095257  | 0.984 | 0.785 | 5.80E-09    | ATP5G2    | 7 | STMN1_NK-cycling |
| 2315 | 1.61E-20 | 0.25074911  | 0.153 | 0.034 | 3.51E-16    | HIST1H2AG | 7 | STMN1_NK-cycling |
| 2316 | 8.31E-14 | -0.25614522 | 0.988 | 0.981 | 1.81E-09    | RPL21     | 7 | STMN1_NK-cycling |
| 2317 | 1.37E-16 | -0.25827585 | 1     | 0.985 | 2.98E-12    | RPL29     | 7 | STMN1_NK-cycling |
| 2318 | 3.51E-19 | -0.26103528 | 0.996 | 0.989 | 7.65E-15    | RPS24     | 7 | STMN1_NK-cycling |
| 2319 | 2.84E-15 | -0.26122096 | 1     | 0.987 | 6.20E-11    | RPL14     | 7 | STMN1_NK-cycling |
| 2320 | 1.42E-06 | -0.26243424 | 0.71  | 0.762 | 0.030885668 | HSP90AB1  | 7 | STMN1_NK-cycling |
| 2321 | 7.09E-21 | -0.2730255  | 1     | 0.994 | 1.55E-16    | RPS15     | 7 | STMN1_NK-cycling |
| 2322 | 1.81E-07 | -0.27832986 | 0.931 | 0.858 | 0.003954204 | PABPC1    | 7 | STMN1_NK-cycling |
| 2323 | 3.59E-10 | -0.28061544 | 0.948 | 0.934 | 7.82E-06    | PTPRC     | 7 | STMN1_NK-cycling |
| 2324 | 7.02E-08 | -0.28530416 | 0.879 | 0.798 | 0.001531702 | TOMM7     | 7 | STMN1_NK-cycling |
| 2325 | 1.26E-22 | -0.28768059 | 1     | 0.992 | 2.74E-18    | RPL37     | 7 | STMN1_NK-cycling |
| 2326 | 8.70E-08 | -0.28805571 | 0.871 | 0.795 | 0.001896742 | RPS4Y1    | 7 | STMN1_NK-cycling |
| 2327 | 1.27E-08 | -0.29432514 | 0.907 | 0.841 | 0.000276601 | EEF2      | 7 | STMN1_NK-cycling |
| 2328 | 2.47E-21 | -0.2961694  | 0.996 | 0.995 | 5.40E-17    | RPS8      | 7 | STMN1_NK-cycling |
| 2329 | 2.87E-07 | -0.30583471 | 0.819 | 0.757 | 0.006268032 | UQCRB     | 7 | STMN1_NK-cycling |
| 2330 | 7.35E-28 | -0.30898434 | 0.996 | 0.995 | 1.60E-23    | RPS3A     | 7 | STMN1_NK-cycling |
| 2331 | 8.34E-15 | -0.30921191 | 0.984 | 0.955 | 1.82E-10    | RPL13A    | 7 | STMN1_NK-cycling |
| 2332 | 1.94E-17 | -0.31109271 | 0.988 | 0.956 | 4.23E-13    | NACA      | 7 | STMN1_NK-cycling |
| 2333 | 5.82E-10 | -0.31230883 | 0.923 | 0.865 | 1.27E-05    | EEF1B2    | 7 | STMN1_NK-cycling |
| 2334 | 6.56E-11 | -0.31260833 | 0.992 | 0.973 | 1.43E-06    | SRGN      | 7 | STMN1_NK-cycling |
| 2335 | 7.92E-28 | -0.31539754 | 0.996 | 0.992 | 1.73E-23    | RPS23     | 7 | STMN1_NK-cycling |
| 2336 | 1.23E-07 | -0.32028291 | 0.823 | 0.739 | 0.002689155 | COMMD6    | 7 | STMN1_NK-cycling |
| 2337 | 4.37E-14 | -0.3206417  | 0.976 | 0.947 | 9.52E-10    | MT-ND1    | 7 | STMN1_NK-cycling |
| 2338 | 2.78E-23 | -0.32074225 | 0.996 | 0.989 | 6.06E-19    | RPL18     | 7 | STMN1_NK-cycling |
| 2339 | 3.12E-11 | -0.32171121 | 0.94  | 0.865 | 6.80E-07    | RPS11     | 7 | STMN1_NK-cycling |
| 2340 | 4.92E-28 | -0.32821807 | 1     | 0.99  | 1.07E-23    | RPS7      | 7 | STMN1_NK-cycling |
| 2341 | 3.74E-25 | -0.33099995 | 0.996 | 0.987 | 8.15E-21    | RPL6      | 7 | STMN1_NK-cycling |
| 2342 | 2.82E-12 | -0.3327193  | 0.931 | 0.857 | 6.16E-08    | RPL4      | 7 | STMN1_NK-cycling |
| 2343 | 4.11E-33 | -0.33511616 | 1     | 0.998 | 8.95E-29    | RPL28     | 7 | STMN1_NK-cycling |
| 2344 | 4.12E-20 | -0.33701434 | 0.976 | 0.971 | 8.99E-16    | RPL8      | 7 | STMN1_NK-cycling |
| 2345 | 1.63E-11 | -0.33760979 | 0.903 | 0.837 | 3.56E-07    | ITM2B     | 7 | STMN1_NK-cycling |
| 2346 | 4.76E-22 | -0.33783327 | 0.988 | 0.977 | 1.04E-17    | RPL17     | 7 | STMN1_NK-cycling |
| 2347 | 3.02E-17 | -0.33786576 | 0.988 | 0.949 | 6.59E-13    | RPS5      | 7 | STMN1_NK-cycling |
| 2348 | 1.32E-11 | -0.34498996 | 0.847 | 0.848 | 2.88E-07    | CD3E      | 7 | STMN1_NK-cycling |
| 2349 | 1.28E-28 | -0.35042717 | 0.996 | 0.988 | 2.79E-24    | RPL7A     | 7 | STMN1_NK-cycling |
| 2350 | 6.99E-29 | -0.3571068  | 1     | 0.987 | 1.53E-24    | RPS4X     | 7 | STMN1_NK-cycling |
| 2351 | 2.19E-33 | -0.35722421 | 1     | 0.994 | 4.78E-29    | RPL26     | 7 | STMN1_NK-cycling |
| 2352 | 7.23E-12 | -0.35973233 | 0.927 | 0.905 | 1.58E-07    | CCL5      | 7 | STMN1_NK-cycling |
| 2353 | 2.23E-07 | -0.36107345 | 0.935 | 0.887 | 0.004852795 | CXCR4     | 7 | STMN1_NK-cycling |
| 2354 | 1.80E-21 | -0.36391055 | 0.996 | 0.99  | 3.93E-17    | MT-ND3    | 7 | STMN1_NK-cycling |
| 2355 | 3.13E-15 | -0.3688686  | 0.98  | 0.93  | 6.83E-11    | UBC       | 7 | STMN1_NK-cycling |
| 2356 | 9.71E-12 | -0.37294097 | 0.907 | 0.902 | 2.12E-07    | TSC22D3   | 7 | STMN1_NK-cycling |
| 2357 | 3.21E-16 | -0.37552841 | 0.911 | 0.864 | 7.00E-12    | RPL31     | 7 | STMN1_NK-cycling |
| 2358 | 7.68E-42 | -0.3775658  | 1     | 0.998 | 1.67E-37    | RPS15A    | 7 | STMN1_NK-cycling |
| 2359 | 2.50E-36 | -0.37850253 | 1     | 0.995 | 5.45E-32    | RPL11     | 7 | STMN1_NK-cycling |
| 2360 | 5.76E-12 | -0.38129044 | 0.984 | 0.967 | 1.26E-07    | ZFP36L2   | 7 | STMN1_NK-cycling |
| 2361 | 2.11E-07 | -0.38594135 | 0.69  | 0.647 | 0.004610542 | CYTIP     | 7 | STMN1_NK-cycling |
| 2362 | 3.98E-07 | -0.38976959 | 0.661 | 0.614 | 0.008674434 | EIF3E     | 7 | STMN1_NK-cycling |
| 2363 | 2.17E-28 | -0.39149999 | 0.996 | 0.985 | 4.74E-24    | RPS25     | 7 | STMN1_NK-cycling |
| 2364 | 9.45E-30 | -0.39461765 | 0.996 | 0.981 | 2.06E-25    | RPL3      | 7 | STMN1_NK-cycling |
| 2365 | 9.76E-12 | -0.39631323 | 0.75  | 0.739 | 2.13E-07    | CD37      | 7 | STMN1_NK-cycling |
| 2366 | 1.57E-06 | -0.39832207 | 0.641 | 0.602 | 0.034315564 | RARRES3   | 7 | STMN1_NK-cycling |
| 2367 | 3.59E-23 | -0.39862871 | 0.972 | 0.959 | 7.82E-19    | RPL22     | 7 | STMN1_NK-cycling |
| 2368 | 7.12E-38 | -0.40867798 | 0.992 | 0.991 | 1.55E-33    | RPLP2     | 7 | STMN1_NK-cycling |
| 2369 | 9.12E-16 | -0.41386007 | 0.895 | 0.88  | 1.99E-11    | DDX5      | 7 | STMN1_NK-cycling |
| 2370 | 7.97E-20 | -0.4185913  | 0.964 | 0.961 | 1.74E-15    | RPS29     | 7 | STMN1_NK-cycling |
| 2371 | 9.50E-37 | -0.41877294 | 0.984 | 0.991 | 2.07E-32    | RPL18A    | 7 | STMN1_NK-cycling |
| 2372 | 1.92E-38 | -0.42414564 | 0.992 | 0.992 | 4.19E-34    | RPS14     | 7 | STMN1_NK-cycling |
| 2373 | 1.98E-51 | -0.42752795 | 1     | 0.998 | 4.33E-47    | RPL10     | 7 | STMN1_NK-cycling |
| 2374 | 3.43E-44 | -0.4317629  | 0.992 | 0.995 | 7.47E-40    | RPL32     | 7 | STMN1_NK-cycling |
| 2375 | 1.24E-28 | -0.43306135 | 0.98  | 0.958 | 2.71E-24    | RPL10A    | 7 | STMN1_NK-cycling |
| 2376 | 5.47E-40 | -0.43532177 | 0.992 | 0.989 | 1.19E-35    | RPL35A    | 7 | STMN1_NK-cycling |
| 2377 | 8.37E-31 | -0.44046371 | 0.98  | 0.977 | 1.83E-26    | RPL36     | 7 | STMN1_NK-cycling |
| 2378 | 1.80E-08 | -0.44061589 | 0.859 | 0.806 | 0.000391885 | KLF6      | 7 | STMN1_NK-cycling |

|      |          |             |       |       |             |            |   |                  |
|------|----------|-------------|-------|-------|-------------|------------|---|------------------|
| 2379 | 2.19E-06 | -0.4413904  | 0.133 | 0.25  | 0.047860763 | SATB1      | 7 | STMN1_NK-cycling |
| 2380 | 4.11E-10 | -0.44292553 | 0.883 | 0.821 | 8.96E-06    | TXNIP      | 7 | STMN1_NK-cycling |
| 2381 | 1.77E-07 | -0.44728939 | 0.77  | 0.736 | 0.003863621 | ZFP36L1    | 7 | STMN1_NK-cycling |
| 2382 | 4.34E-08 | -0.46432061 | 0.524 | 0.577 | 0.000945903 | ALOX5AP    | 7 | STMN1_NK-cycling |
| 2383 | 6.62E-49 | -0.46437537 | 1     | 0.995 | 1.44E-44    | RPS28      | 7 | STMN1_NK-cycling |
| 2384 | 1.10E-43 | -0.46457607 | 0.992 | 0.985 | 2.41E-39    | RPS10      | 7 | STMN1_NK-cycling |
| 2385 | 3.65E-52 | -0.47140275 | 1     | 0.994 | 7.97E-48    | RPL19      | 7 | STMN1_NK-cycling |
| 2386 | 3.19E-42 | -0.47200677 | 0.992 | 0.993 | 6.95E-38    | TPT1       | 7 | STMN1_NK-cycling |
| 2387 | 6.78E-39 | -0.47340314 | 0.996 | 0.989 | 1.48E-34    | RPS18      | 7 | STMN1_NK-cycling |
| 2388 | 2.48E-12 | -0.47746013 | 0.702 | 0.68  | 5.40E-08    | CD48       | 7 | STMN1_NK-cycling |
| 2389 | 1.64E-37 | -0.48221026 | 0.988 | 0.972 | 3.57E-33    | RPL5       | 7 | STMN1_NK-cycling |
| 2390 | 1.38E-09 | -0.48308852 | 0.536 | 0.593 | 3.01E-05    | FYN        | 7 | STMN1_NK-cycling |
| 2391 | 6.44E-44 | -0.48426126 | 0.996 | 0.989 | 1.40E-39    | RPS13      | 7 | STMN1_NK-cycling |
| 2392 | 7.37E-36 | -0.48849932 | 0.972 | 0.956 | 1.61E-31    | RPL24      | 7 | STMN1_NK-cycling |
| 2393 | 1.76E-15 | -0.49408132 | 0.903 | 0.917 | 3.84E-11    | IER2       | 7 | STMN1_NK-cycling |
| 2394 | 2.63E-08 | -0.49490663 | 0.601 | 0.594 | 0.000573843 | MCL1       | 7 | STMN1_NK-cycling |
| 2395 | 2.29E-09 | -0.50329448 | 0.371 | 0.465 | 4.99E-05    | APRT       | 7 | STMN1_NK-cycling |
| 2396 | 4.53E-55 | -0.50467228 | 0.992 | 0.997 | 9.88E-51    | RPL39      | 7 | STMN1_NK-cycling |
| 2397 | 2.11E-06 | -0.50596196 | 0.242 | 0.329 | 0.045973229 | GIMAP1     | 7 | STMN1_NK-cycling |
| 2398 | 2.21E-73 | -0.51164773 | 1     | 1     | 4.81E-69    | EEF1A1     | 7 | STMN1_NK-cycling |
| 2399 | 5.06E-35 | -0.52136444 | 0.972 | 0.955 | 1.10E-30    | RPS2       | 7 | STMN1_NK-cycling |
| 2400 | 2.68E-07 | -0.52163954 | 0.347 | 0.423 | 0.005848365 | RHOH       | 7 | STMN1_NK-cycling |
| 2401 | 1.47E-10 | -0.52498599 | 0.427 | 0.539 | 3.20E-06    | GZMM       | 7 | STMN1_NK-cycling |
| 2402 | 1.59E-48 | -0.52504085 | 0.992 | 0.987 | 3.47E-44    | RPL12      | 7 | STMN1_NK-cycling |
| 2403 | 9.44E-08 | -0.5287804  | 0.359 | 0.437 | 0.002059531 | PDCD4      | 7 | STMN1_NK-cycling |
| 2404 | 1.45E-34 | -0.53036676 | 0.972 | 0.982 | 3.17E-30    | BTG1       | 7 | STMN1_NK-cycling |
| 2405 | 1.87E-22 | -0.53107007 | 0.915 | 0.87  | 4.09E-18    | SARAF      | 7 | STMN1_NK-cycling |
| 2406 | 3.23E-72 | -0.53532201 | 1     | 0.998 | 7.05E-68    | RPS27A     | 7 | STMN1_NK-cycling |
| 2407 | 2.33E-08 | -0.54368463 | 0.343 | 0.427 | 0.00050705  | TC2N       | 7 | STMN1_NK-cycling |
| 2408 | 6.81E-20 | -0.54542298 | 0.77  | 0.783 | 1.48E-15    | PNRC1      | 7 | STMN1_NK-cycling |
| 2409 | 4.42E-34 | -0.54612114 | 0.944 | 0.933 | 9.63E-30    | RPL9       | 7 | STMN1_NK-cycling |
| 2410 | 5.61E-26 | -0.56162729 | 0.875 | 0.878 | 1.22E-21    | HCST       | 7 | STMN1_NK-cycling |
| 2411 | 3.46E-34 | -0.57478342 | 0.907 | 0.901 | 7.55E-30    | PFDN5      | 7 | STMN1_NK-cycling |
| 2412 | 1.05E-32 | -0.57515856 | 0.964 | 0.969 | 2.30E-28    | FTL        | 7 | STMN1_NK-cycling |
| 2413 | 1.21E-16 | -0.57820485 | 0.847 | 0.862 | 2.63E-12    | DUSP2      | 7 | STMN1_NK-cycling |
| 2414 | 6.01E-11 | -0.58616228 | 0.44  | 0.521 | 1.31E-06    | PARP8      | 7 | STMN1_NK-cycling |
| 2415 | 8.50E-70 | -0.59097356 | 0.996 | 0.997 | 1.85E-65    | RPL13      | 7 | STMN1_NK-cycling |
| 2416 | 1.17E-26 | -0.59231501 | 0.79  | 0.872 | 2.56E-22    | IL32       | 7 | STMN1_NK-cycling |
| 2417 | 4.70E-11 | -0.602082   | 0.274 | 0.421 | 1.03E-06    | SNHG8      | 7 | STMN1_NK-cycling |
| 2418 | 1.07E-26 | -0.61106201 | 0.927 | 0.943 | 2.33E-22    | ZFP36      | 7 | STMN1_NK-cycling |
| 2419 | 3.42E-70 | -0.6146413  | 0.996 | 0.997 | 7.47E-66    | RPL34      | 7 | STMN1_NK-cycling |
| 2420 | 5.43E-41 | -0.62847453 | 0.927 | 0.922 | 1.18E-36    | RPL41      | 7 | STMN1_NK-cycling |
| 2421 | 1.20E-15 | -0.6286894  | 0.556 | 0.648 | 2.62E-11    | CD2        | 7 | STMN1_NK-cycling |
| 2422 | 1.83E-80 | -0.64104724 | 1     | 0.996 | 3.99E-76    | RPL30      | 7 | STMN1_NK-cycling |
| 2423 | 4.01E-79 | -0.6623799  | 1     | 0.997 | 8.75E-75    | RPS27      | 7 | STMN1_NK-cycling |
| 2424 | 8.35E-11 | -0.66695198 | 0.649 | 0.676 | 1.82E-06    | DNAJB1     | 7 | STMN1_NK-cycling |
| 2425 | 2.17E-12 | -0.68446567 | 0.492 | 0.598 | 4.73E-08    | CD52       | 7 | STMN1_NK-cycling |
| 2426 | 1.18E-80 | -0.71583396 | 1     | 0.997 | 2.57E-76    | RPS12      | 7 | STMN1_NK-cycling |
| 2427 | 1.05E-25 | -0.75719715 | 0.879 | 0.888 | 2.28E-21    | DUSP1      | 7 | STMN1_NK-cycling |
| 2428 | 1.72E-12 | -0.80707731 | 0.149 | 0.336 | 3.75E-08    | KLRG1      | 7 | STMN1_NK-cycling |
| 2429 | 7.10E-98 | -0.84355868 | 0.996 | 0.998 | 1.55E-93    | AC090498.1 | 7 | STMN1_NK-cycling |
| 2430 | 3.65E-47 | -0.85241771 | 0.899 | 0.965 | 7.97E-43    | JUNB       | 7 | STMN1_NK-cycling |
| 2431 | 6.66E-32 | -0.93893814 | 0.883 | 0.902 | 1.45E-27    | CD69       | 7 | STMN1_NK-cycling |
| 2432 | 4.84E-18 | -0.99680765 | 0.19  | 0.434 | 1.06E-13    | CD8A       | 7 | STMN1_NK-cycling |
| 2433 | 5.02E-31 | -1.06542397 | 0.137 | 0.522 | 1.09E-26    | CD3D       | 7 | STMN1_NK-cycling |
| 2434 | 2.37E-15 | -1.18690654 | 0.552 | 0.612 | 5.18E-11    | KLRB1      | 7 | STMN1_NK-cycling |
| 2435 | 5.22E-53 | 1.11037219  | 0.743 | 0.294 | 1.14E-48    | XCL2       | 8 | XCL2_NK          |
| 2436 | 1.79E-59 | 1.02855882  | 0.912 | 0.568 | 3.89E-55    | CMC1       | 8 | XCL2_NK          |
| 2437 | 2.52E-64 | 0.9643816   | 0.748 | 0.26  | 5.50E-60    | KLRC3      | 8 | XCL2_NK          |
| 2438 | 2.66E-42 | 0.8049556   | 0.774 | 0.362 | 5.80E-38    | KLRF1      | 8 | XCL2_NK          |
| 2439 | 2.12E-49 | 0.77980588  | 0.907 | 0.451 | 4.61E-45    | TYROBP     | 8 | XCL2_NK          |
| 2440 | 2.62E-27 | 0.7340273   | 0.535 | 0.226 | 5.71E-23    | XCL1       | 8 | XCL2_NK          |
| 2441 | 1.90E-24 | 0.73352807  | 0.425 | 0.172 | 4.14E-20    | KIR3DL1    | 8 | XCL2_NK          |
| 2442 | 8.38E-45 | 0.70209614  | 0.283 | 0.055 | 1.83E-40    | GCSAM      | 8 | XCL2_NK          |
| 2443 | 6.87E-25 | 0.6827679   | 0.429 | 0.171 | 1.50E-20    | TRDC       | 8 | XCL2_NK          |
| 2444 | 1.53E-19 | 0.60908844  | 0.69  | 0.48  | 3.33E-15    | PIK3R1     | 8 | XCL2_NK          |
| 2445 | 2.73E-25 | 0.59228249  | 0.327 | 0.11  | 5.95E-21    | APBA2      | 8 | XCL2_NK          |
| 2446 | 1.37E-26 | 0.57799028  | 0.81  | 0.529 | 2.98E-22    | GSTP1      | 8 | XCL2_NK          |
| 2447 | 1.42E-22 | 0.56429138  | 0.788 | 0.501 | 3.10E-18    | TRBC1      | 8 | XCL2_NK          |
| 2448 | 5.05E-19 | 0.54761917  | 0.394 | 0.172 | 1.10E-14    | TIGIT      | 8 | XCL2_NK          |

|      |           |             |       |       |             |            |   |         |
|------|-----------|-------------|-------|-------|-------------|------------|---|---------|
| 2449 | 6.72E-31  | 0.53931383  | 0.938 | 0.559 | 1.47E-26    | KLRD1      | 8 | XCL2_NK |
| 2450 | 4.00E-12  | 0.49487374  | 0.69  | 0.448 | 8.73E-08    | CCL3       | 8 | XCL2_NK |
| 2451 | 2.40E-13  | 0.49130155  | 0.367 | 0.183 | 5.24E-09    | CRTAM      | 8 | XCL2_NK |
| 2452 | 1.52E-16  | 0.48542579  | 0.186 | 0.056 | 3.32E-12    | AC069363.1 | 8 | XCL2_NK |
| 2453 | 1.05E-34  | 0.48317632  | 0.996 | 0.903 | 2.29E-30    | CCL5       | 8 | XCL2_NK |
| 2454 | 2.78E-10  | 0.47905795  | 0.248 | 0.118 | 6.06E-06    | LAT2       | 8 | XCL2_NK |
| 2455 | 8.30E-15  | 0.47700868  | 0.239 | 0.088 | 1.81E-10    | KIR2DL3    | 8 | XCL2_NK |
| 2456 | 1.10E-23  | 0.47307085  | 0.929 | 0.735 | 2.41E-19    | CD7        | 8 | XCL2_NK |
| 2457 | 6.37E-19  | 0.45722462  | 0.429 | 0.185 | 1.39E-14    | HLA-DQA1   | 8 | XCL2_NK |
| 2458 | 1.06E-11  | 0.45174193  | 0.434 | 0.258 | 2.30E-07    | MAPK1      | 8 | XCL2_NK |
| 2459 | 5.26E-35  | 0.45108799  | 0.146 | 0.019 | 1.15E-30    | SPRY2      | 8 | XCL2_NK |
| 2460 | 1.22E-10  | 0.44887741  | 0.327 | 0.176 | 2.66E-06    | TRG-AS1    | 8 | XCL2_NK |
| 2461 | 4.91E-13  | 0.43458455  | 0.376 | 0.188 | 1.07E-08    | FCRL6      | 8 | XCL2_NK |
| 2462 | 1.95E-09  | 0.42949737  | 0.341 | 0.194 | 4.26E-05    | CD160      | 8 | XCL2_NK |
| 2463 | 2.26E-11  | 0.42658053  | 0.668 | 0.545 | 4.94E-07    | STK17A     | 8 | XCL2_NK |
| 2464 | 1.81E-15  | 0.42011781  | 0.212 | 0.072 | 3.95E-11    | KLRC2      | 8 | XCL2_NK |
| 2465 | 1.96E-08  | 0.41004862  | 0.482 | 0.341 | 0.00426731  | AKIRIN2    | 8 | XCL2_NK |
| 2466 | 7.79E-12  | 0.39213218  | 0.133 | 0.04  | 1.70E-07    | SYK        | 8 | XCL2_NK |
| 2467 | 1.25E-17  | 0.38765013  | 0.124 | 0.026 | 2.72E-13    | SPECC1     | 8 | XCL2_NK |
| 2468 | 8.95E-22  | 0.38557516  | 0.996 | 0.882 | 1.95E-17    | IFITM2     | 8 | XCL2_NK |
| 2469 | 7.47E-10  | 0.37682646  | 0.376 | 0.215 | 1.63E-05    | AOAH       | 8 | XCL2_NK |
| 2470 | 2.61E-07  | 0.36675112  | 0.212 | 0.109 | 0.005684346 | PLCG2      | 8 | XCL2_NK |
| 2471 | 2.93E-08  | 0.36154395  | 0.204 | 0.096 | 0.000638615 | A1BG       | 8 | XCL2_NK |
| 2472 | 1.70E-08  | 0.34883835  | 0.381 | 0.23  | 0.000371611 | GNPTAB     | 8 | XCL2_NK |
| 2473 | 4.24E-10  | 0.34670136  | 0.115 | 0.035 | 9.25E-06    | KIR2DL4    | 8 | XCL2_NK |
| 2474 | 1.38E-07  | 0.33940296  | 0.27  | 0.15  | 0.003016682 | CD300A     | 8 | XCL2_NK |
| 2475 | 1.70E-07  | 0.33656094  | 0.681 | 0.571 | 0.003714284 | ALOX5AP    | 8 | XCL2_NK |
| 2476 | 4.80E-08  | 0.33493916  | 0.571 | 0.443 | 0.001047711 | APMAP      | 8 | XCL2_NK |
| 2477 | 6.27E-07  | 0.33271188  | 0.54  | 0.43  | 0.013677659 | PDCD4      | 8 | XCL2_NK |
| 2478 | 2.55E-07  | 0.32797592  | 0.478 | 0.351 | 0.005571106 | C19orf60   | 8 | XCL2_NK |
| 2479 | 5.72E-07  | 0.321213    | 0.46  | 0.333 | 0.012484375 | IL2RB      | 8 | XCL2_NK |
| 2480 | 1.11E-07  | 0.30909     | 0.181 | 0.082 | 0.00242511  | KIR3DL2    | 8 | XCL2_NK |
| 2481 | 1.63E-07  | 0.30560783  | 0.412 | 0.262 | 0.003563432 | HLA-DRB5   | 8 | XCL2_NK |
| 2482 | 8.49E-07  | 0.30328297  | 0.199 | 0.101 | 0.018506064 | ABCB1      | 8 | XCL2_NK |
| 2483 | 1.64E-06  | 0.30098102  | 0.195 | 0.101 | 0.035762656 | RCBTB2     | 8 | XCL2_NK |
| 2484 | 6.10E-07  | 0.29775321  | 0.177 | 0.085 | 0.013311804 | NCR1       | 8 | XCL2_NK |
| 2485 | 2.33E-07  | 0.27659644  | 0.588 | 0.437 | 0.005089521 | HLA-DPA1   | 8 | XCL2_NK |
| 2486 | 1.65E-14  | 0.26295838  | 0.973 | 0.947 | 3.60E-10    | IFITM1     | 8 | XCL2_NK |
| 2487 | 2.09E-07  | 0.25759844  | 0.695 | 0.526 | 0.004551742 | HLA-DRB1   | 8 | XCL2_NK |
| 2488 | 5.75E-10  | 0.25007529  | 0.938 | 0.876 | 1.25E-05    | HCST       | 8 | XCL2_NK |
| 2489 | 1.69E-06  | -0.25446009 | 0.58  | 0.722 | 0.036830611 | LAPTM5     | 8 | XCL2_NK |
| 2490 | 1.15E-09  | -0.32808767 | 0.841 | 0.911 | 2.51E-05    | SH3BGRL3   | 8 | XCL2_NK |
| 2491 | 1.09E-06  | -0.37267781 | 0.288 | 0.462 | 0.023780779 | ARL4C      | 8 | XCL2_NK |
| 2492 | 9.12E-08  | -0.38288536 | 0.314 | 0.514 | 0.001987983 | LDHB       | 8 | XCL2_NK |
| 2493 | 3.74E-10  | -0.39320571 | 0.248 | 0.48  | 8.16E-06    | LIMD2      | 8 | XCL2_NK |
| 2494 | 1.25E-08  | -0.42192986 | 0.425 | 0.611 | 0.000272144 | EMP3       | 8 | XCL2_NK |
| 2495 | 3.06E-08  | -0.44138196 | 0.19  | 0.386 | 0.000666481 | UCP2       | 8 | XCL2_NK |
| 2496 | 6.01E-11  | -0.49814127 | 0.451 | 0.671 | 1.31E-06    | CRIP1      | 8 | XCL2_NK |
| 2497 | 7.18E-11  | -0.51050183 | 0.115 | 0.333 | 1.57E-06    | SELPLG     | 8 | XCL2_NK |
| 2498 | 1.80E-11  | -0.5254131  | 0.642 | 0.792 | 3.93E-07    | NFKBIA     | 8 | XCL2_NK |
| 2499 | 1.14E-07  | -0.52710408 | 0.111 | 0.267 | 0.002479563 | COTL1      | 8 | XCL2_NK |
| 2500 | 8.11E-13  | -0.57695081 | 0.265 | 0.511 | 1.77E-08    | S100A11    | 8 | XCL2_NK |
| 2501 | 1.16E-20  | -0.63344026 | 0.611 | 0.801 | 2.53E-16    | S100A6     | 8 | XCL2_NK |
| 2502 | 1.63E-15  | -0.70946021 | 0.115 | 0.376 | 3.56E-11    | SPOCK2     | 8 | XCL2_NK |
| 2503 | 1.09E-13  | -0.75102184 | 0.102 | 0.337 | 2.39E-09    | KLRG1      | 8 | XCL2_NK |
| 2504 | 2.55E-09  | -0.80648739 | 0.19  | 0.375 | 5.57E-05    | LGALS1     | 8 | XCL2_NK |
| 2505 | 1.73E-22  | -0.85130241 | 0.226 | 0.582 | 3.77E-18    | TNFAIP3    | 8 | XCL2_NK |
| 2506 | 5.60E-08  | -0.97298159 | 0.553 | 0.683 | 0.001220429 | MT2A       | 8 | XCL2_NK |
| 2507 | 2.22E-19  | -0.97513056 | 0.133 | 0.435 | 4.84E-15    | CD8A       | 8 | XCL2_NK |
| 2508 | 2.90E-51  | -1.09607554 | 0.575 | 0.879 | 6.32E-47    | S100A4     | 8 | XCL2_NK |
| 2509 | 4.55E-31  | -1.12077138 | 0.102 | 0.522 | 9.92E-27    | CD3D       | 8 | XCL2_NK |
| 2510 | 1.84E-33  | -1.13224097 | 0.177 | 0.611 | 4.01E-29    | CD52       | 8 | XCL2_NK |
| 2511 | 2.47E-141 | 2.30271846  | 0.929 | 0.216 | 5.39E-137   | XCL1       | 9 | XCL1_NK |
| 2512 | 2.01E-235 | 1.93473494  | 0.94  | 0.116 | 4.39E-231   | FCER1G     | 9 | XCL1_NK |
| 2513 | 9.14E-82  | 1.6993531   | 0.88  | 0.293 | 1.99E-77    | XCL2       | 9 | XCL1_NK |
| 2514 | 3.70E-72  | 1.55897592  | 0.923 | 0.38  | 8.07E-68    | AREG       | 9 | XCL1_NK |
| 2515 | 7.86E-99  | 1.52038604  | 0.902 | 0.319 | 1.71E-94    | IL2RB      | 9 | XCL1_NK |
| 2516 | 3.94E-53  | 1.37094734  | 0.896 | 0.443 | 8.60E-49    | CCL3       | 9 | XCL1_NK |
| 2517 | 3.60E-72  | 1.14933642  | 0.628 | 0.141 | 7.85E-68    | KLRC1      | 9 | XCL1_NK |
| 2518 | 5.22E-75  | 1.10306569  | 0.989 | 0.735 | 1.14E-70    | CD7        | 9 | XCL1_NK |

|      |           |            |       |       |             |           |   |         |
|------|-----------|------------|-------|-------|-------------|-----------|---|---------|
| 2519 | 1.13E-91  | 1.0832884  | 0.53  | 0.085 | 2.46E-87    | IRF8      | 9 | XCL1_NK |
| 2520 | 5.60E-61  | 1.04419131 | 0.65  | 0.185 | 1.22E-56    | CD160     | 9 | XCL1_NK |
| 2521 | 5.89E-58  | 1.04256937 | 0.951 | 0.57  | 1.28E-53    | CMC1      | 9 | XCL1_NK |
| 2522 | 1.16E-45  | 1.00838602 | 0.699 | 0.259 | 2.53E-41    | CLIC3     | 9 | XCL1_NK |
| 2523 | 1.12E-53  | 0.99709191 | 0.913 | 0.527 | 2.45E-49    | GSTP1     | 9 | XCL1_NK |
| 2524 | 4.65E-78  | 0.9824016  | 0.541 | 0.101 | 1.01E-73    | CD38      | 9 | XCL1_NK |
| 2525 | 1.02E-63  | 0.96189587 | 0.918 | 0.361 | 2.23E-59    | KLRF1     | 9 | XCL1_NK |
| 2526 | 3.03E-57  | 0.92998932 | 0.973 | 0.452 | 6.60E-53    | TYROBP    | 9 | XCL1_NK |
| 2527 | 6.60E-56  | 0.88952335 | 0.574 | 0.15  | 1.44E-51    | TMIGD2    | 9 | XCL1_NK |
| 2528 | 1.85E-33  | 0.88325566 | 0.475 | 0.154 | 4.04E-29    | ICAM1     | 9 | XCL1_NK |
| 2529 | 5.05E-50  | 0.86464546 | 0.683 | 0.227 | 1.10E-45    | TXK       | 9 | XCL1_NK |
| 2530 | 1.44E-32  | 0.83880629 | 0.705 | 0.343 | 3.14E-28    | CLDND1    | 9 | XCL1_NK |
| 2531 | 2.76E-41  | 0.82876298 | 0.579 | 0.184 | 6.02E-37    | YES1      | 9 | XCL1_NK |
| 2532 | 2.39E-47  | 0.80033605 | 0.541 | 0.146 | 5.21E-43    | MCTP2     | 9 | XCL1_NK |
| 2533 | 1.73E-54  | 0.77604608 | 0.301 | 0.044 | 3.77E-50    | GSTM2     | 9 | XCL1_NK |
| 2534 | 3.99E-56  | 0.7658277  | 0.503 | 0.111 | 8.71E-52    | LAT2      | 9 | XCL1_NK |
| 2535 | 5.77E-27  | 0.75104441 | 0.781 | 0.479 | 1.26E-22    | PIK3R1    | 9 | XCL1_NK |
| 2536 | 2.37E-43  | 0.74703997 | 0.989 | 0.597 | 5.18E-39    | KLRB1     | 9 | XCL1_NK |
| 2537 | 1.09E-41  | 0.73316545 | 0.984 | 0.561 | 2.38E-37    | KLRD1     | 9 | XCL1_NK |
| 2538 | 1.01E-44  | 0.68625744 | 0.437 | 0.102 | 2.21E-40    | PLCG2     | 9 | XCL1_NK |
| 2539 | 3.58E-136 | 0.68373809 | 0.257 | 0.01  | 7.80E-132   | LDB2      | 9 | XCL1_NK |
| 2540 | 7.48E-44  | 0.68171554 | 0.995 | 0.973 | 1.63E-39    | SRGN      | 9 | XCL1_NK |
| 2541 | 2.71E-28  | 0.66906872 | 0.552 | 0.211 | 5.90E-24    | AOAH      | 9 | XCL1_NK |
| 2542 | 3.75E-33  | 0.6685841  | 0.437 | 0.128 | 8.18E-29    | RAB11FIP1 | 9 | XCL1_NK |
| 2543 | 3.15E-50  | 0.6610975  | 0.399 | 0.078 | 6.86E-46    | NCR1      | 9 | XCL1_NK |
| 2544 | 8.52E-36  | 0.65608325 | 0.301 | 0.063 | 1.86E-31    | SPRY1     | 9 | XCL1_NK |
| 2545 | 5.52E-45  | 0.65481299 | 1     | 0.946 | 1.20E-40    | IFITM1    | 9 | XCL1_NK |
| 2546 | 9.44E-42  | 0.64510204 | 0.607 | 0.182 | 2.06E-37    | SH2D1B    | 9 | XCL1_NK |
| 2547 | 1.02E-27  | 0.6349526  | 0.35  | 0.102 | 2.23E-23    | TLE1      | 9 | XCL1_NK |
| 2548 | 1.58E-88  | 0.62355744 | 0.246 | 0.017 | 3.45E-84    | TOX2      | 9 | XCL1_NK |
| 2549 | 8.93E-25  | 0.62017463 | 0.71  | 0.385 | 1.95E-20    | CD63      | 9 | XCL1_NK |
| 2550 | 1.42E-07  | 0.60519426 | 0.546 | 0.368 | 0.00310006  | CCL3L3    | 9 | XCL1_NK |
| 2551 | 3.79E-148 | 0.60444827 | 0.24  | 0.007 | 8.26E-144   | IL18      | 9 | XCL1_NK |
| 2552 | 5.04E-23  | 0.60419861 | 0.656 | 0.317 | 1.10E-18    | ARHGAP9   | 9 | XCL1_NK |
| 2553 | 3.42E-21  | 0.59812097 | 0.825 | 0.567 | 7.45E-17    | ALOX5AP   | 9 | XCL1_NK |
| 2554 | 7.07E-30  | 0.59491938 | 0.574 | 0.214 | 1.54E-25    | IFITM3    | 9 | XCL1_NK |
| 2555 | 4.09E-19  | 0.5841227  | 0.437 | 0.172 | 8.91E-15    | TRDC      | 9 | XCL1_NK |
| 2556 | 1.57E-30  | 0.56973094 | 0.328 | 0.082 | 3.43E-26    | CLASP1    | 9 | XCL1_NK |
| 2557 | 1.22E-20  | 0.55715702 | 0.623 | 0.323 | 2.66E-16    | MATK      | 9 | XCL1_NK |
| 2558 | 1.74E-48  | 0.55658861 | 0.262 | 0.037 | 3.80E-44    | SYK       | 9 | XCL1_NK |
| 2559 | 1.35E-215 | 0.55020765 | 0.202 | 0.001 | 2.94E-211   | BCO2      | 9 | XCL1_NK |
| 2560 | 1.09E-17  | 0.54732524 | 0.956 | 0.827 | 2.37E-13    | FOS       | 9 | XCL1_NK |
| 2561 | 1.02E-44  | 0.54720951 | 0.251 | 0.036 | 2.22E-40    | GSN       | 9 | XCL1_NK |
| 2562 | 1.03E-14  | 0.54323937 | 0.923 | 0.781 | 2.24E-10    | NFKBIA    | 9 | XCL1_NK |
| 2563 | 5.55E-184 | 0.54060518 | 0.219 | 0.003 | 1.21E-179   | ADGRG3    | 9 | XCL1_NK |
| 2564 | 3.60E-20  | 0.53502194 | 0.798 | 0.542 | 7.86E-16    | STK17A    | 9 | XCL1_NK |
| 2565 | 1.93E-14  | 0.53376197 | 0.355 | 0.153 | 4.21E-10    | CEBPD     | 9 | XCL1_NK |
| 2566 | 7.41E-102 | 0.53308612 | 0.213 | 0.01  | 1.62E-97    | SPTSSB    | 9 | XCL1_NK |
| 2567 | 3.73E-16  | 0.5294277  | 0.246 | 0.079 | 8.13E-12    | MIR222HG  | 9 | XCL1_NK |
| 2568 | 7.43E-13  | 0.52863434 | 0.825 | 0.687 | 1.62E-08    | NR4A2     | 9 | XCL1_NK |
| 2569 | 1.29E-92  | 0.52788054 | 0.219 | 0.012 | 2.82E-88    | SERPINE2  | 9 | XCL1_NK |
| 2570 | 2.76E-13  | 0.52757444 | 0.634 | 0.403 | 6.02E-09    | DENND2D   | 9 | XCL1_NK |
| 2571 | 1.48E-25  | 0.52533806 | 0.344 | 0.099 | 3.23E-21    | RASA1     | 9 | XCL1_NK |
| 2572 | 1.03E-18  | 0.52255263 | 0.842 | 0.577 | 2.25E-14    | EIF3G     | 9 | XCL1_NK |
| 2573 | 4.45E-24  | 0.52078739 | 0.344 | 0.104 | 9.70E-20    | NCAM1     | 9 | XCL1_NK |
| 2574 | 3.06E-14  | 0.51728788 | 0.656 | 0.4   | 6.67E-10    | MAP3K8    | 9 | XCL1_NK |
| 2575 | 1.01E-14  | 0.51503532 | 0.322 | 0.128 | 2.21E-10    | MAFF      | 9 | XCL1_NK |
| 2576 | 1.96E-25  | 0.49662829 | 0.355 | 0.103 | 4.28E-21    | PTPN12    | 9 | XCL1_NK |
| 2577 | 2.27E-30  | 0.49589582 | 0.262 | 0.055 | 4.94E-26    | SLFN13    | 9 | XCL1_NK |
| 2578 | 2.06E-91  | 0.49470865 | 0.191 | 0.009 | 4.48E-87    | ADAMTS17  | 9 | XCL1_NK |
| 2579 | 2.03E-14  | 0.4915414  | 0.454 | 0.218 | 4.43E-10    | HELZ      | 9 | XCL1_NK |
| 2580 | 3.73E-16  | 0.49048678 | 0.29  | 0.103 | 8.14E-12    | DUSP10    | 9 | XCL1_NK |
| 2581 | 1.42E-14  | 0.48963796 | 0.454 | 0.212 | 3.09E-10    | TOX       | 9 | XCL1_NK |
| 2582 | 3.98E-17  | 0.4868375  | 0.743 | 0.455 | 8.68E-13    | CTSD      | 9 | XCL1_NK |
| 2583 | 1.32E-12  | 0.48105315 | 0.486 | 0.258 | 2.88E-08    | MAPK1     | 9 | XCL1_NK |
| 2584 | 1.91E-14  | 0.47714596 | 0.361 | 0.151 | 4.16E-10    | CXCR6     | 9 | XCL1_NK |
| 2585 | 3.23E-07  | 0.47714045 | 0.579 | 0.423 | 0.007037616 | NFKBIZ    | 9 | XCL1_NK |
| 2586 | 4.61E-15  | 0.47142586 | 0.973 | 0.875 | 1.01E-10    | CCL4      | 9 | XCL1_NK |
| 2587 | 7.00E-22  | 0.46834415 | 0.355 | 0.114 | 1.53E-17    | DHRS3     | 9 | XCL1_NK |
| 2588 | 3.75E-17  | 0.4655654  | 0.776 | 0.493 | 8.18E-13    | LY6E      | 9 | XCL1_NK |

|      |          |            |       |       |             |            |   |         |
|------|----------|------------|-------|-------|-------------|------------|---|---------|
| 2589 | 8.90E-13 | 0.46082862 | 0.612 | 0.352 | 1.94E-08    | BST2       | 9 | XCL1_NK |
| 2590 | 4.11E-57 | 0.4599787  | 0.23  | 0.023 | 8.95E-53    | ATP8B4     | 9 | XCL1_NK |
| 2591 | 1.82E-17 | 0.45844622 | 0.404 | 0.159 | 3.96E-13    | HSH2D      | 9 | XCL1_NK |
| 2592 | 1.75E-13 | 0.45631558 | 0.361 | 0.158 | 3.82E-09    | TCIRG1     | 9 | XCL1_NK |
| 2593 | 9.74E-23 | 0.45602501 | 0.88  | 0.45  | 2.12E-18    | GZMK       | 9 | XCL1_NK |
| 2594 | 1.10E-13 | 0.45546764 | 0.328 | 0.135 | 2.40E-09    | KAT6B      | 9 | XCL1_NK |
| 2595 | 8.01E-25 | 0.44957799 | 0.984 | 0.884 | 1.75E-20    | IFITM2     | 9 | XCL1_NK |
| 2596 | 1.67E-12 | 0.44856687 | 0.563 | 0.32  | 3.64E-08    | SASH3      | 9 | XCL1_NK |
| 2597 | 4.73E-15 | 0.44569549 | 0.306 | 0.115 | 1.03E-10    | DUSP6      | 9 | XCL1_NK |
| 2598 | 2.06E-14 | 0.44195368 | 0.355 | 0.151 | 4.49E-10    | MPG        | 9 | XCL1_NK |
| 2599 | 2.16E-36 | 0.44084739 | 0.164 | 0.019 | 4.71E-32    | SPRY2      | 9 | XCL1_NK |
| 2600 | 4.18E-09 | 0.44069386 | 0.585 | 0.39  | 9.11E-05    | REL        | 9 | XCL1_NK |
| 2601 | 2.92E-20 | 0.43951382 | 0.301 | 0.092 | 6.38E-16    | COLQ       | 9 | XCL1_NK |
| 2602 | 9.82E-17 | 0.43517217 | 0.202 | 0.056 | 2.14E-12    | GRAMD3     | 9 | XCL1_NK |
| 2603 | 1.23E-08 | 0.43472397 | 0.475 | 0.282 | 0.000269225 | FAM46C     | 9 | XCL1_NK |
| 2604 | 3.10E-13 | 0.43251662 | 0.699 | 0.44  | 6.76E-09    | APMAP      | 9 | XCL1_NK |
| 2605 | 3.01E-15 | 0.42896237 | 0.492 | 0.234 | 6.56E-11    | OFD1       | 9 | XCL1_NK |
| 2606 | 8.73E-15 | 0.42778969 | 0.393 | 0.163 | 1.90E-10    | FGR        | 9 | XCL1_NK |
| 2607 | 1.87E-29 | 0.42606383 | 0.197 | 0.033 | 4.08E-25    | KIR2DL4    | 9 | XCL1_NK |
| 2608 | 5.69E-11 | 0.42531862 | 0.639 | 0.412 | 1.24E-06    | TMEM2      | 9 | XCL1_NK |
| 2609 | 7.90E-20 | 0.4211006  | 0.257 | 0.072 | 1.72E-15    | SLC16A3    | 9 | XCL1_NK |
| 2610 | 5.54E-12 | 0.41906414 | 0.361 | 0.166 | 1.21E-07    | SES1       | 9 | XCL1_NK |
| 2611 | 1.63E-13 | 0.41667957 | 0.322 | 0.132 | 3.56E-09    | ZBTB16     | 9 | XCL1_NK |
| 2612 | 2.10E-19 | 0.41538625 | 0.355 | 0.12  | 4.58E-15    | GFOD1      | 9 | XCL1_NK |
| 2613 | 4.61E-36 | 0.41494927 | 0.186 | 0.025 | 1.01E-31    | SPECC1     | 9 | XCL1_NK |
| 2614 | 8.87E-16 | 0.41393568 | 0.295 | 0.105 | 1.93E-11    | FASLG      | 9 | XCL1_NK |
| 2615 | 4.35E-14 | 0.41304794 | 0.443 | 0.205 | 9.48E-10    | PTGDR      | 9 | XCL1_NK |
| 2616 | 9.37E-12 | 0.4122382  | 0.459 | 0.232 | 2.04E-07    | EOMES      | 9 | XCL1_NK |
| 2617 | 1.62E-12 | 0.40604786 | 0.339 | 0.146 | 3.54E-08    | PCMTD1     | 9 | XCL1_NK |
| 2618 | 2.42E-12 | 0.40549513 | 0.694 | 0.443 | 5.28E-08    | CD96       | 9 | XCL1_NK |
| 2619 | 4.12E-18 | 0.40487586 | 0.339 | 0.118 | 8.99E-14    | SKAP2      | 9 | XCL1_NK |
| 2620 | 3.84E-14 | 0.40181539 | 0.809 | 0.583 | 8.37E-10    | FYN        | 9 | XCL1_NK |
| 2621 | 6.07E-12 | 0.40119987 | 0.579 | 0.341 | 1.32E-07    | FKBP11     | 9 | XCL1_NK |
| 2622 | 3.66E-11 | 0.40065215 | 0.454 | 0.243 | 7.97E-07    | VPS37B     | 9 | XCL1_NK |
| 2623 | 2.08E-13 | 0.39742151 | 0.295 | 0.114 | 4.53E-09    | BAZ2B      | 9 | XCL1_NK |
| 2624 | 1.12E-12 | 0.39617922 | 0.377 | 0.171 | 2.45E-08    | CD244      | 9 | XCL1_NK |
| 2625 | 1.40E-34 | 0.39574242 | 0.175 | 0.023 | 3.05E-30    | P2RY11     | 9 | XCL1_NK |
| 2626 | 9.13E-16 | 0.39570585 | 0.301 | 0.108 | 1.99E-11    | RUNX2      | 9 | XCL1_NK |
| 2627 | 2.96E-08 | 0.39257316 | 0.383 | 0.211 | 0.000646207 | GATA3      | 9 | XCL1_NK |
| 2628 | 4.34E-17 | 0.39227561 | 0.23  | 0.066 | 9.46E-13    | CAPN12     | 9 | XCL1_NK |
| 2629 | 1.04E-09 | 0.39001915 | 0.372 | 0.187 | 2.26E-05    | INPP5D     | 9 | XCL1_NK |
| 2630 | 5.16E-16 | 0.38777501 | 0.383 | 0.15  | 1.13E-11    | YARS       | 9 | XCL1_NK |
| 2631 | 1.05E-21 | 0.38709654 | 0.191 | 0.041 | 2.29E-17    | LZTFL1     | 9 | XCL1_NK |
| 2632 | 1.12E-11 | 0.384162   | 0.262 | 0.105 | 2.44E-07    | TMEM141    | 9 | XCL1_NK |
| 2633 | 3.67E-23 | 0.38321558 | 0.18  | 0.035 | 8.00E-19    | SLC44A1    | 9 | XCL1_NK |
| 2634 | 8.28E-15 | 0.38284027 | 0.235 | 0.075 | 1.81E-10    | ERGIC1     | 9 | XCL1_NK |
| 2635 | 1.28E-12 | 0.37653069 | 0.311 | 0.126 | 2.79E-08    | GSAP       | 9 | XCL1_NK |
| 2636 | 2.39E-13 | 0.37630022 | 0.175 | 0.051 | 5.21E-09    | HDAC9      | 9 | XCL1_NK |
| 2637 | 5.88E-19 | 0.37487227 | 0.191 | 0.046 | 1.28E-14    | MIR181A1HG | 9 | XCL1_NK |
| 2638 | 4.02E-10 | 0.37249327 | 0.694 | 0.503 | 8.77E-06    | ATP6V0C    | 9 | XCL1_NK |
| 2639 | 3.12E-09 | 0.37239534 | 0.623 | 0.406 | 6.80E-05    | SLC38A1    | 9 | XCL1_NK |
| 2640 | 1.90E-14 | 0.37008042 | 0.88  | 0.597 | 4.13E-10    | CD247      | 9 | XCL1_NK |
| 2641 | 2.01E-11 | 0.36550834 | 0.667 | 0.396 | 4.37E-07    | CFLAR      | 9 | XCL1_NK |
| 2642 | 1.70E-10 | 0.36294486 | 0.475 | 0.256 | 3.70E-06    | SYNRG      | 9 | XCL1_NK |
| 2643 | 4.65E-10 | 0.36212495 | 0.301 | 0.137 | 1.01E-05    | PDE7A      | 9 | XCL1_NK |
| 2644 | 9.86E-12 | 0.36199528 | 0.585 | 0.328 | 2.15E-07    | PRDX5      | 9 | XCL1_NK |
| 2645 | 1.92E-12 | 0.35854571 | 0.295 | 0.119 | 4.18E-08    | CASP3      | 9 | XCL1_NK |
| 2646 | 4.63E-13 | 0.35817368 | 0.219 | 0.072 | 1.01E-08    | CLASP2     | 9 | XCL1_NK |
| 2647 | 9.15E-10 | 0.35621112 | 0.404 | 0.205 | 2.00E-05    | ADAM8      | 9 | XCL1_NK |
| 2648 | 4.70E-09 | 0.3556852  | 0.366 | 0.19  | 0.000102557 | ACAA2      | 9 | XCL1_NK |
| 2649 | 7.19E-11 | 0.35473225 | 0.672 | 0.426 | 1.57E-06    | PDCD4      | 9 | XCL1_NK |
| 2650 | 1.21E-27 | 0.35413685 | 0.137 | 0.018 | 2.64E-23    | CHKA       | 9 | XCL1_NK |
| 2651 | 8.19E-12 | 0.35249516 | 0.29  | 0.119 | 1.79E-07    | WDSUB1     | 9 | XCL1_NK |
| 2652 | 8.42E-11 | 0.35205196 | 0.508 | 0.273 | 1.84E-06    | CHST12     | 9 | XCL1_NK |
| 2653 | 1.20E-09 | 0.35174065 | 0.23  | 0.095 | 2.61E-05    | MPST       | 9 | XCL1_NK |
| 2654 | 7.28E-09 | 0.35046247 | 0.355 | 0.181 | 0.000158725 | NR4A3      | 9 | XCL1_NK |
| 2655 | 1.60E-06 | 0.34913046 | 0.776 | 0.64  | 0.034895518 | PPP1R15A   | 9 | XCL1_NK |
| 2656 | 1.38E-09 | 0.34645756 | 0.246 | 0.104 | 3.01E-05    | LPAR6      | 9 | XCL1_NK |
| 2657 | 5.17E-09 | 0.34608462 | 0.219 | 0.09  | 0.00011269  | FNDC3B     | 9 | XCL1_NK |
| 2658 | 1.57E-11 | 0.34554294 | 0.306 | 0.128 | 3.42E-07    | DGKD       | 9 | XCL1_NK |

|      |          |            |       |       |             |               |   |         |
|------|----------|------------|-------|-------|-------------|---------------|---|---------|
| 2659 | 2.61E-11 | 0.3446531  | 0.268 | 0.106 | 5.70E-07    | MIB2          | 9 | XCL1_NK |
| 2660 | 1.15E-08 | 0.34463634 | 0.497 | 0.302 | 0.000250516 | ECH1          | 9 | XCL1_NK |
| 2661 | 1.41E-08 | 0.34445151 | 0.743 | 0.519 | 0.000306928 | SYTL3         | 9 | XCL1_NK |
| 2662 | 7.99E-08 | 0.34327889 | 0.443 | 0.264 | 0.001742965 | PIM2          | 9 | XCL1_NK |
| 2663 | 2.22E-11 | 0.33871426 | 0.612 | 0.353 | 4.84E-07    | RGS1          | 9 | XCL1_NK |
| 2664 | 5.29E-08 | 0.33647637 | 0.459 | 0.278 | 0.001153084 | PPP2R1A       | 9 | XCL1_NK |
| 2665 | 1.39E-07 | 0.33584067 | 0.273 | 0.137 | 0.003020768 | ITCH          | 9 | XCL1_NK |
| 2666 | 1.73E-09 | 0.3354331  | 0.421 | 0.22  | 3.77E-05    | NDUFS8        | 9 | XCL1_NK |
| 2667 | 3.09E-14 | 0.3351457  | 0.219 | 0.068 | 6.74E-10    | DZIP3         | 9 | XCL1_NK |
| 2668 | 1.62E-09 | 0.33482873 | 0.284 | 0.128 | 3.53E-05    | TIPARP        | 9 | XCL1_NK |
| 2669 | 4.02E-09 | 0.33386362 | 0.454 | 0.259 | 8.76E-05    | NAP1L4        | 9 | XCL1_NK |
| 2670 | 2.79E-07 | 0.33265759 | 0.475 | 0.299 | 0.006084182 | PNN           | 9 | XCL1_NK |
| 2671 | 2.79E-12 | 0.33245602 | 0.284 | 0.111 | 6.08E-08    | S100PBP       | 9 | XCL1_NK |
| 2672 | 3.82E-13 | 0.33050741 | 0.235 | 0.079 | 8.33E-09    | RP11-1000B6.3 | 9 | XCL1_NK |
| 2673 | 2.86E-11 | 0.33000416 | 0.301 | 0.127 | 6.23E-07    | RIN3          | 9 | XCL1_NK |
| 2674 | 3.11E-07 | 0.32980525 | 0.432 | 0.264 | 0.006788131 | IL16          | 9 | XCL1_NK |
| 2675 | 2.05E-09 | 0.32901278 | 0.443 | 0.24  | 4.48E-05    | RNF125        | 9 | XCL1_NK |
| 2676 | 1.50E-07 | 0.32844148 | 0.694 | 0.53  | 0.003272458 | GZMM          | 9 | XCL1_NK |
| 2677 | 6.12E-11 | 0.32763635 | 0.208 | 0.075 | 1.34E-06    | FHL3          | 9 | XCL1_NK |
| 2678 | 1.11E-18 | 0.32566317 | 0.388 | 0.138 | 2.42E-14    | TRGV9         | 9 | XCL1_NK |
| 2679 | 2.45E-11 | 0.32472128 | 0.268 | 0.105 | 5.34E-07    | ELL2          | 9 | XCL1_NK |
| 2680 | 1.24E-07 | 0.32257283 | 0.464 | 0.276 | 0.002703543 | NDUFV1        | 9 | XCL1_NK |
| 2681 | 9.16E-09 | 0.31956746 | 0.557 | 0.331 | 0.000199725 | ITGA4         | 9 | XCL1_NK |
| 2682 | 8.41E-10 | 0.3168953  | 0.191 | 0.07  | 1.83E-05    | MMP25-AS1     | 9 | XCL1_NK |
| 2683 | 1.28E-14 | 0.31239936 | 0.186 | 0.052 | 2.79E-10    | CXXC5         | 9 | XCL1_NK |
| 2684 | 3.77E-08 | 0.31216988 | 0.372 | 0.198 | 0.000822156 | MYBL1         | 9 | XCL1_NK |
| 2685 | 9.48E-07 | 0.31097935 | 0.497 | 0.33  | 0.020677671 | RHOC          | 9 | XCL1_NK |
| 2686 | 7.68E-07 | 0.31040744 | 0.601 | 0.413 | 0.016745766 | ETS1          | 9 | XCL1_NK |
| 2687 | 5.57E-07 | 0.3097489  | 0.432 | 0.262 | 0.012139135 | GYG1          | 9 | XCL1_NK |
| 2688 | 1.36E-06 | 0.3093565  | 0.328 | 0.185 | 0.02965535  | PDE4B         | 9 | XCL1_NK |
| 2689 | 3.90E-08 | 0.30712371 | 0.76  | 0.575 | 0.000849549 | JAK1          | 9 | XCL1_NK |
| 2690 | 1.19E-07 | 0.30633905 | 0.617 | 0.421 | 0.002599402 | DDX17         | 9 | XCL1_NK |
| 2691 | 1.77E-06 | 0.30423772 | 0.41  | 0.249 | 0.038500018 | STARD3NL      | 9 | XCL1_NK |
| 2692 | 4.91E-08 | 0.30294271 | 0.361 | 0.19  | 0.001070831 | LPCAT1        | 9 | XCL1_NK |
| 2693 | 2.26E-07 | 0.30263544 | 0.459 | 0.273 | 0.004930482 | KLRC3         | 9 | XCL1_NK |
| 2694 | 1.01E-11 | 0.30262861 | 0.235 | 0.084 | 2.21E-07    | PDLIM1        | 9 | XCL1_NK |
| 2695 | 3.58E-24 | 0.30013492 | 1     | 0.999 | 7.81E-20    | MT-CO3        | 9 | XCL1_NK |
| 2696 | 1.46E-06 | 0.30008345 | 0.35  | 0.202 | 0.031749383 | SMARCA2       | 9 | XCL1_NK |
| 2697 | 4.29E-08 | 0.29977452 | 0.322 | 0.164 | 0.000935575 | TNFRSF1A      | 9 | XCL1_NK |
| 2698 | 1.75E-14 | 0.29975087 | 0.158 | 0.04  | 3.81E-10    | RHOBTB3       | 9 | XCL1_NK |
| 2699 | 2.80E-08 | 0.29915693 | 0.311 | 0.153 | 0.000611473 | LYN           | 9 | XCL1_NK |
| 2700 | 2.24E-06 | 0.2989165  | 0.355 | 0.209 | 0.048770685 | RAP1GDS1      | 9 | XCL1_NK |
| 2701 | 9.69E-12 | 0.29783062 | 0.208 | 0.071 | 2.11E-07    | UBASH3B       | 9 | XCL1_NK |
| 2702 | 2.94E-07 | 0.29758353 | 0.404 | 0.229 | 0.006407292 | AGTRAP        | 9 | XCL1_NK |
| 2703 | 1.20E-06 | 0.2960298  | 0.404 | 0.25  | 0.026240906 | METTL9        | 9 | XCL1_NK |
| 2704 | 1.03E-07 | 0.29557842 | 0.984 | 0.941 | 0.002245164 | ZFP36         | 9 | XCL1_NK |
| 2705 | 1.62E-24 | 0.29526826 | 0.137 | 0.02  | 3.54E-20    | SIGLEC7       | 9 | XCL1_NK |
| 2706 | 1.13E-07 | 0.29501553 | 0.197 | 0.084 | 0.002459935 | TRIB2         | 9 | XCL1_NK |
| 2707 | 1.82E-09 | 0.29426533 | 0.328 | 0.155 | 3.96E-05    | PARVG         | 9 | XCL1_NK |
| 2708 | 1.12E-10 | 0.29300055 | 0.18  | 0.06  | 2.44E-06    | ACP5          | 9 | XCL1_NK |
| 2709 | 3.82E-11 | 0.29274953 | 0.262 | 0.102 | 8.34E-07    | CLPTM1        | 9 | XCL1_NK |
| 2710 | 2.85E-07 | 0.29243101 | 0.399 | 0.229 | 0.006224729 | CPNE1         | 9 | XCL1_NK |
| 2711 | 2.66E-08 | 0.2895942  | 1     | 0.898 | 0.000581023 | CD69          | 9 | XCL1_NK |
| 2712 | 1.86E-07 | 0.28948894 | 0.268 | 0.132 | 0.004047658 | B3GAT3        | 9 | XCL1_NK |
| 2713 | 5.63E-11 | 0.2877052  | 0.131 | 0.036 | 1.23E-06    | IRS2          | 9 | XCL1_NK |
| 2714 | 5.57E-08 | 0.28761166 | 0.689 | 0.492 | 0.001214301 | WIPF1         | 9 | XCL1_NK |
| 2715 | 1.28E-14 | 0.28676565 | 0.142 | 0.033 | 2.78E-10    | HIP1          | 9 | XCL1_NK |
| 2716 | 1.41E-08 | 0.28517105 | 0.23  | 0.099 | 0.000308321 | HIPK2         | 9 | XCL1_NK |
| 2717 | 2.04E-11 | 0.28334754 | 0.224 | 0.08  | 4.44E-07    | BEX4          | 9 | XCL1_NK |
| 2718 | 3.56E-08 | 0.2832035  | 0.464 | 0.264 | 0.0007764   | NUCB2         | 9 | XCL1_NK |
| 2719 | 3.33E-32 | 0.2817519  | 0.104 | 0.009 | 7.26E-28    | B3GNT7        | 9 | XCL1_NK |
| 2720 | 7.44E-08 | 0.28144147 | 0.164 | 0.063 | 0.001622902 | ABHD2         | 9 | XCL1_NK |
| 2721 | 1.82E-07 | 0.28131004 | 0.317 | 0.163 | 0.003976174 | LPIN1         | 9 | XCL1_NK |
| 2722 | 1.69E-09 | 0.2806396  | 0.186 | 0.068 | 3.68E-05    | TBXAS1        | 9 | XCL1_NK |
| 2723 | 2.25E-13 | 0.28062896 | 0.973 | 0.857 | 4.91E-09    | PABPC1        | 9 | XCL1_NK |
| 2724 | 4.64E-07 | 0.27836491 | 0.415 | 0.237 | 0.010119184 | SLC44A2       | 9 | XCL1_NK |
| 2725 | 1.11E-06 | 0.27832263 | 0.208 | 0.097 | 0.024190561 | DPP8          | 9 | XCL1_NK |
| 2726 | 1.07E-09 | 0.27810032 | 0.268 | 0.114 | 2.33E-05    | ECI2          | 9 | XCL1_NK |
| 2727 | 3.85E-07 | 0.27718096 | 0.164 | 0.067 | 0.008388919 | ABCG1         | 9 | XCL1_NK |
| 2728 | 3.37E-09 | 0.27671969 | 0.169 | 0.06  | 7.36E-05    | COG2          | 9 | XCL1_NK |



|      |          |             |       |       |             |            |   |         |
|------|----------|-------------|-------|-------|-------------|------------|---|---------|
| 2729 | 2.71E-83 | 0.27646992  | 0.109 | 0.002 | 5.92E-79    | SMIM24     | 9 | XCL1_NK |
| 2730 | 3.75E-11 | 0.27563277  | 0.175 | 0.056 | 8.18E-07    | STAM       | 9 | XCL1_NK |
| 2731 | 4.23E-09 | 0.2746918   | 0.301 | 0.139 | 9.23E-05    | RCHY1      | 9 | XCL1_NK |
| 2732 | 1.38E-08 | 0.27411421  | 0.235 | 0.102 | 0.0003019   | TWISTNB    | 9 | XCL1_NK |
| 2733 | 4.42E-10 | 0.2737239   | 0.175 | 0.06  | 9.65E-06    | MMD        | 9 | XCL1_NK |
| 2734 | 1.33E-06 | 0.27314768  | 0.208 | 0.098 | 0.028919901 | DNM2       | 9 | XCL1_NK |
| 2735 | 9.13E-11 | 0.27256934  | 0.23  | 0.085 | 1.99E-06    | C1orf162   | 9 | XCL1_NK |
| 2736 | 1.29E-06 | 0.2720802   | 0.781 | 0.634 | 0.028138884 | TAGAP      | 9 | XCL1_NK |
| 2737 | 2.98E-07 | 0.27154833  | 0.169 | 0.069 | 0.006500376 | CTDP1      | 9 | XCL1_NK |
| 2738 | 1.18E-18 | 0.27112701  | 0.131 | 0.023 | 2.58E-14    | GNAQ       | 9 | XCL1_NK |
| 2739 | 8.78E-07 | 0.27099318  | 0.18  | 0.08  | 0.019152294 | SNX10      | 9 | XCL1_NK |
| 2740 | 7.40E-11 | 0.27046204  | 0.148 | 0.044 | 1.61E-06    | LIMK1      | 9 | XCL1_NK |
| 2741 | 8.10E-07 | 0.26805793  | 0.284 | 0.149 | 0.017671867 | SKIL       | 9 | XCL1_NK |
| 2742 | 5.15E-07 | 0.26781419  | 0.175 | 0.074 | 0.011220717 | KLRC2      | 9 | XCL1_NK |
| 2743 | 4.09E-08 | 0.26732581  | 0.929 | 0.778 | 0.000890996 | PNRC1      | 9 | XCL1_NK |
| 2744 | 1.51E-06 | 0.26429393  | 0.508 | 0.321 | 0.032821144 | PPP1R12A   | 9 | XCL1_NK |
| 2745 | 7.44E-07 | 0.26423683  | 0.246 | 0.122 | 0.01621786  | HDAC7      | 9 | XCL1_NK |
| 2746 | 1.13E-08 | 0.26095438  | 0.235 | 0.101 | 0.00024682  | ABCB1      | 9 | XCL1_NK |
| 2747 | 6.61E-07 | 0.25985568  | 0.186 | 0.081 | 0.014405074 | EI24       | 9 | XCL1_NK |
| 2748 | 4.89E-11 | 0.25902924  | 0.169 | 0.053 | 1.07E-06    | OSBPL2     | 9 | XCL1_NK |
| 2749 | 1.05E-11 | 0.25735887  | 0.164 | 0.049 | 2.28E-07    | ITGA6      | 9 | XCL1_NK |
| 2750 | 1.84E-09 | 0.25715087  | 0.142 | 0.045 | 4.02E-05    | CCDC28B    | 9 | XCL1_NK |
| 2751 | 1.87E-19 | 0.25592809  | 0.126 | 0.021 | 4.09E-15    | MGST2      | 9 | XCL1_NK |
| 2752 | 7.46E-07 | 0.253736    | 0.661 | 0.468 | 0.016268241 | ARPC5L     | 9 | XCL1_NK |
| 2753 | 6.28E-28 | 0.25245707  | 0.126 | 0.015 | 1.37E-23    | FBP1       | 9 | XCL1_NK |
| 2754 | 2.25E-07 | 0.25181532  | 0.191 | 0.082 | 0.004910215 | AGK        | 9 | XCL1_NK |
| 2755 | 2.66E-07 | 0.25062008  | 0.12  | 0.042 | 0.005811051 | GPD1L      | 9 | XCL1_NK |
| 2756 | 2.75E-10 | 0.25044368  | 0.197 | 0.069 | 5.99E-06    | FAM49A     | 9 | XCL1_NK |
| 2757 | 3.00E-12 | -0.25455876 | 0.995 | 0.995 | 6.54E-08    | RPL11      | 9 | XCL1_NK |
| 2758 | 1.45E-06 | -0.25947867 | 0.918 | 0.934 | 0.031644726 | RPL9       | 9 | XCL1_NK |
| 2759 | 2.43E-12 | -0.25979802 | 0.995 | 0.997 | 5.30E-08    | RPL34      | 9 | XCL1_NK |
| 2760 | 4.26E-13 | -0.26204548 | 0.995 | 0.995 | 9.29E-09    | RPL32      | 9 | XCL1_NK |
| 2761 | 5.15E-10 | -0.26367595 | 0.934 | 0.959 | 1.12E-05    | UBA52      | 9 | XCL1_NK |
| 2762 | 2.50E-13 | -0.26626843 | 0.995 | 0.998 | 5.45E-09    | AC090498.1 | 9 | XCL1_NK |
| 2763 | 2.17E-11 | -0.27525571 | 0.967 | 0.979 | 4.74E-07    | RPL23A     | 9 | XCL1_NK |
| 2764 | 1.21E-10 | -0.27731185 | 0.973 | 0.987 | 2.63E-06    | RPS21      | 9 | XCL1_NK |
| 2765 | 4.78E-12 | -0.28995663 | 0.978 | 0.987 | 1.04E-07    | RPL12      | 9 | XCL1_NK |
| 2766 | 2.94E-19 | -0.29126146 | 1     | 0.994 | 6.41E-15    | RPS3       | 9 | XCL1_NK |
| 2767 | 4.54E-07 | -0.29302435 | 0.956 | 0.963 | 0.009901722 | FTH1       | 9 | XCL1_NK |
| 2768 | 4.87E-11 | -0.29522311 | 0.989 | 0.998 | 1.06E-06    | RPS19      | 9 | XCL1_NK |
| 2769 | 3.95E-17 | -0.29644229 | 1     | 0.996 | 8.62E-13    | RPL30      | 9 | XCL1_NK |
| 2770 | 6.79E-16 | -0.29943064 | 0.989 | 0.993 | 1.48E-11    | RPS14      | 9 | XCL1_NK |
| 2771 | 2.59E-08 | -0.3012167  | 0.896 | 0.913 | 0.000564235 | HSPA8      | 9 | XCL1_NK |
| 2772 | 4.21E-13 | -0.32429737 | 0.956 | 0.978 | 9.19E-09    | RPL36      | 9 | XCL1_NK |
| 2773 | 1.59E-16 | -0.32437026 | 0.989 | 0.997 | 3.48E-12    | RPS27      | 9 | XCL1_NK |
| 2774 | 1.68E-09 | -0.32863524 | 0.973 | 0.969 | 3.66E-05    | FTL        | 9 | XCL1_NK |
| 2775 | 5.42E-38 | -0.3380903  | 1     | 1     | 1.18E-33    | B2M        | 9 | XCL1_NK |
| 2776 | 4.96E-15 | -0.34380486 | 0.989 | 0.993 | 1.08E-10    | TMSB10     | 9 | XCL1_NK |
| 2777 | 5.83E-09 | -0.36647237 | 0.568 | 0.707 | 0.0001272   | FXYD5      | 9 | XCL1_NK |
| 2778 | 7.19E-20 | -0.38200541 | 0.962 | 0.989 | 1.57E-15    | RPL14      | 9 | XCL1_NK |
| 2779 | 1.44E-30 | -0.39526711 | 0.995 | 0.998 | 3.15E-26    | RPL28      | 9 | XCL1_NK |
| 2780 | 8.60E-20 | -0.39780314 | 0.956 | 0.972 | 1.87E-15    | RPS16      | 9 | XCL1_NK |
| 2781 | 6.67E-21 | -0.39998799 | 0.978 | 0.986 | 1.46E-16    | RPS25      | 9 | XCL1_NK |
| 2782 | 2.98E-09 | -0.40381794 | 0.628 | 0.74  | 6.51E-05    | RPS20      | 9 | XCL1_NK |
| 2783 | 3.48E-25 | -0.4075367  | 0.989 | 0.997 | 7.59E-21    | RPS12      | 9 | XCL1_NK |
| 2784 | 4.19E-07 | -0.41152217 | 0.634 | 0.705 | 0.009134097 | S100A10    | 9 | XCL1_NK |
| 2785 | 1.40E-15 | -0.44481442 | 0.803 | 0.898 | 3.05E-11    | RPL38      | 9 | XCL1_NK |
| 2786 | 1.28E-06 | -0.44557624 | 0.104 | 0.261 | 0.027812303 | FAM65B     | 9 | XCL1_NK |
| 2787 | 1.78E-13 | -0.44752707 | 0.749 | 0.852 | 3.89E-09    | CD3E       | 9 | XCL1_NK |
| 2788 | 2.87E-12 | -0.44889274 | 0.661 | 0.778 | 6.26E-08    | PPDPF      | 9 | XCL1_NK |
| 2789 | 2.88E-07 | -0.45194034 | 0.344 | 0.506 | 0.006278044 | S100A11    | 9 | XCL1_NK |
| 2790 | 1.10E-18 | -0.4708049  | 0.907 | 0.963 | 2.40E-14    | RPS29      | 9 | XCL1_NK |
| 2791 | 2.40E-07 | -0.47601665 | 0.246 | 0.419 | 0.005224257 | EZR        | 9 | XCL1_NK |
| 2792 | 1.83E-08 | -0.476314   | 0.301 | 0.497 | 0.000398566 | PPP2R5C    | 9 | XCL1_NK |
| 2793 | 1.18E-07 | -0.48034667 | 0.246 | 0.406 | 0.002572312 | CAST       | 9 | XCL1_NK |
| 2794 | 5.98E-08 | -0.5040213  | 0.18  | 0.359 | 0.001304751 | ANXA2      | 9 | XCL1_NK |
| 2795 | 5.97E-12 | -0.5267034  | 0.393 | 0.653 | 1.30E-07    | CD2        | 9 | XCL1_NK |
| 2796 | 6.96E-11 | -0.60284329 | 0.246 | 0.462 | 1.52E-06    | ARL4C      | 9 | XCL1_NK |
| 2797 | 9.96E-10 | -0.60465063 | 0.257 | 0.449 | 2.17E-05    | HLA-DPA1   | 9 | XCL1_NK |
| 2798 | 2.77E-10 | -0.61499872 | 0.18  | 0.382 | 6.04E-06    | PRDX1      | 9 | XCL1_NK |

|      |           |             |       |       |             |               |    |                 |
|------|-----------|-------------|-------|-------|-------------|---------------|----|-----------------|
| 2799 | 4.41E-10  | -0.62957578 | 0.355 | 0.538 | 9.62E-06    | HLA-DRB1      | 9  | XCL1_NK         |
| 2800 | 6.86E-10  | -0.63663744 | 0.164 | 0.363 | 1.50E-05    | C12orf75      | 9  | XCL1_NK         |
| 2801 | 2.65E-08  | -0.63792511 | 0.142 | 0.328 | 0.00057765  | BATF          | 9  | XCL1_NK         |
| 2802 | 4.66E-16  | -0.65365531 | 0.432 | 0.651 | 1.02E-11    | C12orf57      | 9  | XCL1_NK         |
| 2803 | 5.12E-11  | -0.6594139  | 0.158 | 0.381 | 1.12E-06    | SYNE2         | 9  | XCL1_NK         |
| 2804 | 1.18E-10  | -0.66254355 | 0.153 | 0.369 | 2.57E-06    | FLNA          | 9  | XCL1_NK         |
| 2805 | 5.89E-27  | -0.67178679 | 0.426 | 0.882 | 1.28E-22    | IL32          | 9  | XCL1_NK         |
| 2806 | 3.28E-11  | -0.81707958 | 0.115 | 0.335 | 7.15E-07    | KLRG1         | 9  | XCL1_NK         |
| 2807 | 5.23E-15  | -0.82396825 | 0.191 | 0.455 | 1.14E-10    | HLA-DPB1      | 9  | XCL1_NK         |
| 2808 | 2.99E-09  | -0.82929068 | 0.219 | 0.43  | 6.53E-05    | TNF           | 9  | XCL1_NK         |
| 2809 | 2.69E-39  | -0.85450312 | 0.76  | 0.913 | 5.87E-35    | SH3BGRL3      | 9  | XCL1_NK         |
| 2810 | 1.16E-22  | -0.89215426 | 0.279 | 0.615 | 2.53E-18    | EMP3          | 9  | XCL1_NK         |
| 2811 | 3.51E-12  | -0.95440498 | 0.224 | 0.448 | 7.65E-08    | GZMB          | 9  | XCL1_NK         |
| 2812 | 3.45E-11  | -0.99566733 | 0.137 | 0.349 | 7.53E-07    | FCGR3A        | 9  | XCL1_NK         |
| 2813 | 2.34E-25  | -1.04079461 | 0.328 | 0.673 | 5.10E-21    | CRIP1         | 9  | XCL1_NK         |
| 2814 | 5.80E-24  | -1.05238155 | 0.322 | 0.663 | 1.27E-19    | ANXA1         | 9  | XCL1_NK         |
| 2815 | 9.23E-37  | -1.13513088 | 0.486 | 0.834 | 2.01E-32    | VIM           | 9  | XCL1_NK         |
| 2816 | 8.00E-19  | -1.13996882 | 0.24  | 0.534 | 1.75E-14    | GZMH          | 9  | XCL1_NK         |
| 2817 | 1.99E-06  | -1.2540128  | 0.175 | 0.316 | 0.043334318 | MT1X          | 9  | XCL1_NK         |
| 2818 | 7.58E-16  | -1.44288    | 0.464 | 0.685 | 1.65E-11    | MT2A          | 9  | XCL1_NK         |
| 2819 | 5.39E-58  | -1.52338244 | 0.235 | 0.811 | 1.18E-53    | S100A6        | 9  | XCL1_NK         |
| 2820 | 6.24E-62  | -1.59096226 | 0.437 | 0.881 | 1.36E-57    | S100A4        | 9  | XCL1_NK         |
| 2821 | 3.79E-12  | -1.84227394 | 0.175 | 0.389 | 8.27E-08    | GNLY          | 9  | XCL1_NK         |
| 2822 | 2.61E-121 | 2.02932585  | 0.988 | 0.309 | 5.69E-117   | STMN1         | 10 | STMN1_T-cycling |
| 2823 | 0         | 1.98067443  | 0.876 | 0.041 | 0           | UBE2C         | 10 | STMN1_T-cycling |
| 2824 | 1.18E-120 | 1.95676688  | 0.988 | 0.322 | 2.57E-116   | HMGB2         | 10 | STMN1_T-cycling |
| 2825 | 0         | 1.95083471  | 0.888 | 0.039 | 0           | ASPM          | 10 | STMN1_T-cycling |
| 2826 | 0         | 1.91727119  | 0.863 | 0.05  | 0           | MKI67         | 10 | STMN1_T-cycling |
| 2827 | 0         | 1.87987245  | 0.832 | 0.04  | 0           | CENPF         | 10 | STMN1_T-cycling |
| 2828 | 3.52E-98  | 1.82063631  | 0.994 | 0.462 | 7.67E-94    | TUBB          | 10 | STMN1_T-cycling |
| 2829 | 0         | 1.81281885  | 0.839 | 0.043 | 0           | TOP2A         | 10 | STMN1_T-cycling |
| 2830 | 6.10E-91  | 1.69250799  | 1     | 0.573 | 1.33E-86    | TUBA1B        | 10 | STMN1_T-cycling |
| 2831 | 7.00E-59  | 1.6388547   | 0.857 | 0.361 | 1.53E-54    | HIST1H4C      | 10 | STMN1_T-cycling |
| 2832 | 0         | 1.60455653  | 0.851 | 0.051 | 0           | NUSAP1        | 10 | STMN1_T-cycling |
| 2833 | 8.73E-74  | 1.59860923  | 0.932 | 0.451 | 1.90E-69    | ARL6IP1       | 10 | STMN1_T-cycling |
| 2834 | 4.44E-84  | 1.49968904  | 0.988 | 0.538 | 9.68E-80    | HMG2          | 10 | STMN1_T-cycling |
| 2835 | 0         | 1.46680602  | 0.789 | 0.037 | 0           | TPX2          | 10 | STMN1_T-cycling |
| 2836 | 1.07E-197 | 1.41487246  | 0.863 | 0.097 | 2.34E-193   | SMC4          | 10 | STMN1_T-cycling |
| 2837 | 1.97E-283 | 1.3511674   | 0.658 | 0.033 | 4.29E-279   | CDC20         | 10 | STMN1_T-cycling |
| 2838 | 0         | 1.33510093  | 0.683 | 0.029 | 0           | HMMR          | 10 | STMN1_T-cycling |
| 2839 | 4.20E-291 | 1.30791239  | 0.683 | 0.034 | 9.16E-287   | CDK1          | 10 | STMN1_T-cycling |
| 2840 | 1.45E-79  | 1.30084732  | 0.994 | 0.818 | 3.16E-75    | VIM           | 10 | STMN1_T-cycling |
| 2841 | 0         | 1.29419099  | 0.764 | 0.034 | 0           | BIRC5         | 10 | STMN1_T-cycling |
| 2842 | 2.58E-97  | 1.26666753  | 0.938 | 0.289 | 5.62E-93    | H2AFV         | 10 | STMN1_T-cycling |
| 2843 | 8.70E-164 | 1.25991662  | 0.565 | 0.046 | 1.90E-159   | RRM2          | 10 | STMN1_T-cycling |
| 2844 | 1.71E-213 | 1.22764213  | 0.776 | 0.069 | 3.72E-209   | CKS1B         | 10 | STMN1_T-cycling |
| 2845 | 2.65E-167 | 1.22587031  | 0.571 | 0.045 | 5.78E-163   | TYMS          | 10 | STMN1_T-cycling |
| 2846 | 2.27E-135 | 1.22379378  | 0.826 | 0.131 | 4.95E-131   | PTTG1         | 10 | STMN1_T-cycling |
| 2847 | 3.77E-91  | 1.21395119  | 0.857 | 0.214 | 8.22E-87    | TUBA1C        | 10 | STMN1_T-cycling |
| 2848 | 0         | 1.19179137  | 0.652 | 0.027 | 0           | CCNA2         | 10 | STMN1_T-cycling |
| 2849 | 1.16E-277 | 1.1889403   | 0.652 | 0.033 | 2.54E-273   | CDKN3         | 10 | STMN1_T-cycling |
| 2850 | 7.15E-263 | 1.15025468  | 0.658 | 0.036 | 1.56E-258   | PRC1          | 10 | STMN1_T-cycling |
| 2851 | 1.46E-298 | 1.14923804  | 0.646 | 0.029 | 3.19E-294   | TROAP         | 10 | STMN1_T-cycling |
| 2852 | 2.32E-177 | 1.14194743  | 0.727 | 0.072 | 5.05E-173   | KIF20B        | 10 | STMN1_T-cycling |
| 2853 | 0         | 1.13969552  | 0.64  | 0.026 | 0           | CCNB2         | 10 | STMN1_T-cycling |
| 2854 | 3.06E-91  | 1.09431846  | 0.733 | 0.144 | 6.68E-87    | KPNA2         | 10 | STMN1_T-cycling |
| 2855 | 8.60E-263 | 1.09052119  | 0.621 | 0.031 | 1.88E-258   | KIFC1         | 10 | STMN1_T-cycling |
| 2856 | 3.34E-250 | 1.08683203  | 0.59  | 0.029 | 7.29E-246   | CASC5         | 10 | STMN1_T-cycling |
| 2857 | 2.06E-56  | 1.08532253  | 0.969 | 0.609 | 4.50E-52    | H2AFZ         | 10 | STMN1_T-cycling |
| 2858 | 2.05E-246 | 1.08018964  | 0.553 | 0.026 | 4.47E-242   | CCNB1         | 10 | STMN1_T-cycling |
| 2859 | 9.73E-220 | 1.07963263  | 0.764 | 0.062 | 2.12E-215   | MAD2L1        | 10 | STMN1_T-cycling |
| 2860 | 6.72E-65  | 1.06884477  | 0.87  | 0.307 | 1.46E-60    | NUCKS1        | 10 | STMN1_T-cycling |
| 2861 | 1.98E-254 | 1.05286323  | 0.584 | 0.028 | 4.31E-250   | DLGAP5        | 10 | STMN1_T-cycling |
| 2862 | 1.52E-266 | 1.04570325  | 0.64  | 0.033 | 3.32E-262   | CDCA8         | 10 | STMN1_T-cycling |
| 2863 | 1.01E-150 | 1.02867694  | 0.708 | 0.081 | 2.20E-146   | RP11-620J15.3 | 10 | STMN1_T-cycling |
| 2864 | 4.50E-91  | 1.02764446  | 0.752 | 0.147 | 9.80E-87    | TMPO          | 10 | STMN1_T-cycling |
| 2865 | 9.01E-58  | 1.01984195  | 0.888 | 0.405 | 1.97E-53    | ANP32B        | 10 | STMN1_T-cycling |
| 2866 | 3.34E-272 | 1.00389194  | 0.559 | 0.023 | 7.28E-268   | KIF14         | 10 | STMN1_T-cycling |
| 2867 | 5.44E-239 | 0.99618298  | 0.534 | 0.025 | 1.19E-234   | CDCA3         | 10 | STMN1_T-cycling |
| 2868 | 2.64E-39  | 0.99005593  | 0.863 | 0.411 | 5.76E-35    | TNF           | 10 | STMN1_T-cycling |

|      |           |            |       |       |           |           |    |            |
|------|-----------|------------|-------|-------|-----------|-----------|----|------------|
| 2869 | 1.24E-59  | 0.989322   | 0.894 | 0.361 | 2.70E-55  | CALM3     | 10 | STMN1_T-cy |
| 2870 | 5.51E-174 | 0.97176408 | 0.646 | 0.056 | 1.20E-169 | CKAP2     | 10 | STMN1_T-cy |
| 2871 | 3.88E-71  | 0.97066497 | 0.938 | 0.316 | 8.47E-67  | HP1BP3    | 10 | STMN1_T-cy |
| 2872 | 1.59E-133 | 0.97008754 | 0.739 | 0.097 | 3.46E-129 | KIF22     | 10 | STMN1_T-cy |
| 2873 | 2.38E-239 | 0.96475039 | 0.615 | 0.034 | 5.20E-235 | NUF2      | 10 | STMN1_T-cy |
| 2874 | 6.20E-58  | 0.9618931  | 0.901 | 0.353 | 1.35E-53  | RAD21     | 10 | STMN1_T-cy |
| 2875 | 3.87E-228 | 0.9548554  | 0.509 | 0.023 | 8.43E-224 | PLK1      | 10 | STMN1_T-cy |
| 2876 | 2.43E-234 | 0.93763375 | 0.584 | 0.031 | 5.31E-230 | GTSE1     | 10 | STMN1_T-cy |
| 2877 | 5.02E-262 | 0.93569902 | 0.559 | 0.024 | 1.10E-257 | HJURP     | 10 | STMN1_T-cy |
| 2878 | 3.01E-51  | 0.9228408  | 0.646 | 0.17  | 6.55E-47  | ATF3      | 10 | STMN1_T-cy |
| 2879 | 3.66E-103 | 0.92133802 | 0.689 | 0.107 | 7.98E-99  | LMNB1     | 10 | STMN1_T-cy |
| 2880 | 3.37E-55  | 0.92051078 | 0.665 | 0.177 | 7.35E-51  | PTMS      | 10 | STMN1_T-cy |
| 2881 | 2.85E-246 | 0.91605521 | 0.54  | 0.024 | 6.21E-242 | CENPE     | 10 | STMN1_T-cy |
| 2882 | 2.67E-194 | 0.91438582 | 0.59  | 0.04  | 5.82E-190 | RACGAP1   | 10 | STMN1_T-cy |
| 2883 | 1.48E-44  | 0.91147068 | 0.925 | 0.71  | 3.23E-40  | CALM2     | 10 | STMN1_T-cy |
| 2884 | 1.97E-258 | 0.90977521 | 0.547 | 0.023 | 4.29E-254 | KIF23     | 10 | STMN1_T-cy |
| 2885 | 1.16E-100 | 0.89737276 | 0.646 | 0.096 | 2.53E-96  | SPTBN1    | 10 | STMN1_T-cy |
| 2886 | 3.11E-159 | 0.8949482  | 0.609 | 0.054 | 6.78E-155 | SMC2      | 10 | STMN1_T-cy |
| 2887 | 8.90E-247 | 0.89421059 | 0.528 | 0.023 | 1.94E-242 | CDCA2     | 10 | STMN1_T-cy |
| 2888 | 1.49E-62  | 0.86155978 | 0.801 | 0.222 | 3.25E-58  | PLP2      | 10 | STMN1_T-cy |
| 2889 | 6.50E-49  | 0.85556362 | 0.981 | 0.818 | 1.42E-44  | HMGB1     | 10 | STMN1_T-cy |
| 2890 | 1.89E-161 | 0.85531812 | 0.491 | 0.034 | 4.12E-157 | SGOL2     | 10 | STMN1_T-cy |
| 2891 | 1.26E-122 | 0.85326742 | 0.602 | 0.07  | 2.74E-118 | CKAP5     | 10 | STMN1_T-cy |
| 2892 | 4.05E-49  | 0.84436783 | 0.814 | 0.288 | 8.84E-45  | CKS2      | 10 | STMN1_T-cy |
| 2893 | 1.18E-48  | 0.84298095 | 0.82  | 0.288 | 2.58E-44  | HN1       | 10 | STMN1_T-cy |
| 2894 | 3.18E-74  | 0.83453191 | 0.665 | 0.135 | 6.94E-70  | MZT1      | 10 | STMN1_T-cy |
| 2895 | 7.23E-241 | 0.81875202 | 0.516 | 0.022 | 1.58E-236 | DEPDC1B   | 10 | STMN1_T-cy |
| 2896 | 3.55E-59  | 0.80943249 | 0.714 | 0.185 | 7.74E-55  | CDC25B    | 10 | STMN1_T-cy |
| 2897 | 2.69E-113 | 0.80520607 | 0.553 | 0.063 | 5.87E-109 | NCAPD2    | 10 | STMN1_T-cy |
| 2898 | 4.54E-263 | 0.80274056 | 0.441 | 0.013 | 9.89E-259 | KIF20A    | 10 | STMN1_T-cy |
| 2899 | 7.98E-177 | 0.79522691 | 0.491 | 0.03  | 1.74E-172 | CCDC34    | 10 | STMN1_T-cy |
| 2900 | 9.63E-43  | 0.79106597 | 0.77  | 0.279 | 2.10E-38  | DCTN3     | 10 | STMN1_T-cy |
| 2901 | 7.55E-130 | 0.79097653 | 0.429 | 0.032 | 1.65E-125 | KIAA0101  | 10 | STMN1_T-cy |
| 2902 | 1.21E-154 | 0.78779488 | 0.379 | 0.02  | 2.65E-150 | CDCA5     | 10 | STMN1_T-cy |
| 2903 | 2.49E-39  | 0.78303532 | 0.814 | 0.34  | 5.44E-35  | ANXA2     | 10 | STMN1_T-cy |
| 2904 | 2.61E-199 | 0.77746709 | 0.472 | 0.023 | 5.68E-195 | NCAPG     | 10 | STMN1_T-cy |
| 2905 | 2.53E-45  | 0.77379166 | 0.776 | 0.256 | 5.52E-41  | NUCB2     | 10 | STMN1_T-cy |
| 2906 | 3.93E-34  | 0.76755409 | 0.82  | 0.357 | 8.56E-30  | DEK       | 10 | STMN1_T-cy |
| 2907 | 2.62E-51  | 0.76326323 | 0.739 | 0.216 | 5.71E-47  | ANP32E    | 10 | STMN1_T-cy |
| 2908 | 6.64E-103 | 0.76203776 | 0.453 | 0.047 | 1.45E-98  | CENPM     | 10 | STMN1_T-cy |
| 2909 | 1.36E-186 | 0.75745746 | 0.441 | 0.022 | 2.96E-182 | BUB1      | 10 | STMN1_T-cy |
| 2910 | 5.35E-42  | 0.7568637  | 0.708 | 0.228 | 1.17E-37  | RHEB      | 10 | STMN1_T-cy |
| 2911 | 9.39E-59  | 0.74871648 | 0.702 | 0.176 | 2.05E-54  | YWHAH     | 10 | STMN1_T-cy |
| 2912 | 1.43E-197 | 0.74283033 | 0.472 | 0.024 | 3.13E-193 | AURKB     | 10 | STMN1_T-cy |
| 2913 | 7.82E-192 | 0.74144201 | 0.46  | 0.023 | 1.71E-187 | CKAP2L    | 10 | STMN1_T-cy |
| 2914 | 8.15E-130 | 0.73564825 | 0.348 | 0.02  | 1.78E-125 | UHRF1     | 10 | STMN1_T-cy |
| 2915 | 6.14E-36  | 0.73520797 | 0.901 | 0.526 | 1.34E-31  | RAN       | 10 | STMN1_T-cy |
| 2916 | 2.52E-58  | 0.72804088 | 0.391 | 0.06  | 5.50E-54  | ATAD2     | 10 | STMN1_T-cy |
| 2917 | 1.04E-143 | 0.72752666 | 0.491 | 0.038 | 2.27E-139 | UBE2T     | 10 | STMN1_T-cy |
| 2918 | 1.19E-167 | 0.72653484 | 0.46  | 0.028 | 2.61E-163 | ARHGAP11A | 10 | STMN1_T-cy |
| 2919 | 4.32E-31  | 0.72600105 | 0.801 | 0.367 | 9.42E-27  | H2AFX     | 10 | STMN1_T-cy |
| 2920 | 1.97E-96  | 0.72108702 | 0.528 | 0.067 | 4.29E-92  | CD59      | 10 | STMN1_T-cy |
| 2921 | 7.03E-43  | 0.71860786 | 0.988 | 0.941 | 1.53E-38  | GAPDH     | 10 | STMN1_T-cy |
| 2922 | 1.46E-106 | 0.71404172 | 0.584 | 0.073 | 3.19E-102 | TACC3     | 10 | STMN1_T-cy |
| 2923 | 2.12E-179 | 0.71364129 | 0.429 | 0.021 | 4.63E-175 | KIF2C     | 10 | STMN1_T-cy |
| 2924 | 1.74E-24  | 0.71341693 | 0.292 | 0.071 | 3.81E-20  | CCL20     | 10 | STMN1_T-cy |
| 2925 | 2.59E-34  | 0.70934584 | 0.901 | 0.531 | 5.65E-30  | COX8A     | 10 | STMN1_T-cy |
| 2926 | 2.91E-131 | 0.70812951 | 0.41  | 0.029 | 6.35E-127 | ASF1B     | 10 | STMN1_T-cy |
| 2927 | 2.21E-34  | 0.70691514 | 0.932 | 0.526 | 4.82E-30  | TUBB4B    | 10 | STMN1_T-cy |
| 2928 | 1.09E-110 | 0.70054568 | 0.398 | 0.033 | 2.38E-106 | AURKA     | 10 | STMN1_T-cy |
| 2929 | 3.02E-56  | 0.69653868 | 0.64  | 0.149 | 6.58E-52  | CARHSP1   | 10 | STMN1_T-cy |
| 2930 | 1.76E-245 | 0.69074309 | 0.497 | 0.019 | 3.84E-241 | SGOL1     | 10 | STMN1_T-cy |
| 2931 | 9.81E-25  | 0.68771862 | 0.298 | 0.074 | 2.14E-20  | TRBV6-1   | 10 | STMN1_T-cy |
| 2932 | 9.30E-84  | 0.68421179 | 0.41  | 0.047 | 2.03E-79  | EZH2      | 10 | STMN1_T-cy |
| 2933 | 4.08E-46  | 0.68398813 | 0.714 | 0.215 | 8.89E-42  | LSM5      | 10 | STMN1_T-cy |
| 2934 | 8.70E-111 | 0.68152198 | 0.329 | 0.022 | 1.90E-106 | PKMYT1    | 10 | STMN1_T-cy |
| 2935 | 2.98E-182 | 0.67865353 | 0.435 | 0.021 | 6.49E-178 | KIF11     | 10 | STMN1_T-cy |
| 2936 | 1.36E-27  | 0.67182836 | 0.404 | 0.114 | 2.97E-23  | PCNA      | 10 | STMN1_T-cy |
| 2937 | 3.53E-189 | 0.67151078 | 0.441 | 0.021 | 7.71E-185 | CENPW     | 10 | STMN1_T-cy |
| 2938 | 1.35E-134 | 0.6629313  | 0.391 | 0.025 | 2.93E-130 | MXD3      | 10 | STMN1_T-cy |

|      |           |            |       |       |           |           |    |            |
|------|-----------|------------|-------|-------|-----------|-----------|----|------------|
| 2939 | 1.85E-156 | 0.6591154  | 0.441 | 0.027 | 4.04E-152 | PARPBP    | 10 | STMN1_T-cy |
| 2940 | 1.40E-50  | 0.65526838 | 0.634 | 0.157 | 3.05E-46  | LSM4      | 10 | STMN1_T-cy |
| 2941 | 4.56E-172 | 0.65401321 | 0.385 | 0.017 | 9.95E-168 | SPC25     | 10 | STMN1_T-cy |
| 2942 | 2.83E-180 | 0.65238605 | 0.385 | 0.016 | 6.17E-176 | GPSM2     | 10 | STMN1_T-cy |
| 2943 | 1.62E-100 | 0.64865895 | 0.497 | 0.056 | 3.53E-96  | DTYMK     | 10 | STMN1_T-cy |
| 2944 | 3.21E-194 | 0.64727934 | 0.398 | 0.016 | 6.99E-190 | NEK2      | 10 | STMN1_T-cy |
| 2945 | 7.59E-13  | 0.64663867 | 0.646 | 0.365 | 1.66E-08  | CCL3L3    | 10 | STMN1_T-cy |
| 2946 | 3.52E-133 | 0.6457662  | 0.379 | 0.024 | 7.67E-129 | HYI       | 10 | STMN1_T-cy |
| 2947 | 1.10E-167 | 0.64395592 | 0.41  | 0.021 | 2.39E-163 | ECT2      | 10 | STMN1_T-cy |
| 2948 | 1.36E-50  | 0.63398138 | 0.559 | 0.124 | 2.96E-46  | CNTRL     | 10 | STMN1_T-cy |
| 2949 | 3.53E-93  | 0.63367772 | 0.447 | 0.049 | 7.69E-89  | BARD1     | 10 | STMN1_T-cy |
| 2950 | 8.45E-44  | 0.63166758 | 0.677 | 0.192 | 1.84E-39  | MZT2B     | 10 | STMN1_T-cy |
| 2951 | 3.34E-61  | 0.63113635 | 0.596 | 0.119 | 7.29E-57  | MIS18BP1  | 10 | STMN1_T-cy |
| 2952 | 1.97E-82  | 0.63110984 | 0.478 | 0.063 | 4.30E-78  | PHF19     | 10 | STMN1_T-cy |
| 2953 | 4.11E-67  | 0.63028362 | 0.559 | 0.099 | 8.96E-63  | SKA2      | 10 | STMN1_T-cy |
| 2954 | 8.95E-173 | 0.63027052 | 0.404 | 0.02  | 1.95E-168 | CENPA     | 10 | STMN1_T-cy |
| 2955 | 1.39E-178 | 0.62947601 | 0.366 | 0.015 | 3.04E-174 | KIF4A     | 10 | STMN1_T-cy |
| 2956 | 6.16E-110 | 0.62352998 | 0.335 | 0.023 | 1.34E-105 | CDT1      | 10 | STMN1_T-cy |
| 2957 | 8.29E-183 | 0.6193235  | 0.385 | 0.016 | 1.81E-178 | ANLN      | 10 | STMN1_T-cy |
| 2958 | 7.01E-60  | 0.61649853 | 0.484 | 0.084 | 1.53E-55  | CBX5      | 10 | STMN1_T-cy |
| 2959 | 8.55E-46  | 0.61627304 | 0.602 | 0.153 | 1.86E-41  | UBE2S     | 10 | STMN1_T-cy |
| 2960 | 1.39E-119 | 0.61460056 | 0.36  | 0.024 | 3.03E-115 | RAD51AP1  | 10 | STMN1_T-cy |
| 2961 | 1.28E-136 | 0.60861441 | 0.354 | 0.02  | 2.80E-132 | KIF15     | 10 | STMN1_T-cy |
| 2962 | 1.15E-135 | 0.60813941 | 0.416 | 0.028 | 2.51E-131 | NCAPH     | 10 | STMN1_T-cy |
| 2963 | 1.05E-134 | 0.60291094 | 0.335 | 0.018 | 2.29E-130 | SPAG5     | 10 | STMN1_T-cy |
| 2964 | 1.26E-149 | 0.6019631  | 0.391 | 0.022 | 2.75E-145 | ZWINT     | 10 | STMN1_T-cy |
| 2965 | 1.05E-189 | 0.59805699 | 0.398 | 0.016 | 2.29E-185 | TTK       | 10 | STMN1_T-cy |
| 2966 | 3.90E-35  | 0.59723932 | 0.547 | 0.156 | 8.51E-31  | FAM111A   | 10 | STMN1_T-cy |
| 2967 | 1.56E-25  | 0.58552941 | 0.863 | 0.461 | 3.39E-21  | BUB3      | 10 | STMN1_T-cy |
| 2968 | 1.88E-19  | 0.58545702 | 0.901 | 0.655 | 4.11E-15  | CRIP1     | 10 | STMN1_T-cy |
| 2969 | 1.03E-72  | 0.58347285 | 0.447 | 0.062 | 2.24E-68  | CDKN2C    | 10 | STMN1_T-cy |
| 2970 | 9.10E-69  | 0.58314592 | 0.503 | 0.081 | 1.98E-64  | CENPK     | 10 | STMN1_T-cy |
| 2971 | 6.10E-30  | 0.58294983 | 0.839 | 0.355 | 1.33E-25  | NAP1L1    | 10 | STMN1_T-cy |
| 2972 | 2.00E-13  | 0.57862661 | 0.727 | 0.364 | 4.37E-09  | SYNE2     | 10 | STMN1_T-cy |
| 2973 | 3.56E-34  | 0.5775873  | 0.571 | 0.172 | 7.77E-30  | CDKN2D    | 10 | STMN1_T-cy |
| 2974 | 4.67E-166 | 0.57496772 | 0.366 | 0.016 | 1.02E-161 | CEP55     | 10 | STMN1_T-cy |
| 2975 | 2.38E-100 | 0.57458003 | 0.366 | 0.031 | 5.19E-96  | NDC80     | 10 | STMN1_T-cy |
| 2976 | 2.01E-81  | 0.57231804 | 0.354 | 0.036 | 4.38E-77  | SAC3D1    | 10 | STMN1_T-cy |
| 2977 | 1.11E-33  | 0.5717979  | 0.671 | 0.222 | 2.42E-29  | DCK       | 10 | STMN1_T-cy |
| 2978 | 2.98E-29  | 0.56981625 | 0.994 | 0.991 | 6.51E-25  | PTMA      | 10 | STMN1_T-cy |
| 2979 | 6.38E-109 | 0.56873432 | 0.348 | 0.025 | 1.39E-104 | CENPU     | 10 | STMN1_T-cy |
| 2980 | 3.43E-103 | 0.56510896 | 0.329 | 0.024 | 7.48E-99  | BRCA2     | 10 | STMN1_T-cy |
| 2981 | 3.79E-94  | 0.56448292 | 0.398 | 0.039 | 8.27E-90  | CENPN     | 10 | STMN1_T-cy |
| 2982 | 3.16E-28  | 0.56200636 | 0.857 | 0.403 | 6.90E-24  | CDK2AP2   | 10 | STMN1_T-cy |
| 2983 | 1.43E-39  | 0.56088014 | 0.329 | 0.06  | 3.11E-35  | CD70      | 10 | STMN1_T-cy |
| 2984 | 9.40E-24  | 0.56086072 | 0.863 | 0.477 | 2.05E-19  | HMGN1     | 10 | STMN1_T-cy |
| 2985 | 3.07E-30  | 0.55769606 | 0.981 | 0.837 | 6.70E-26  | HNRNPA2B1 | 10 | STMN1_T-cy |
| 2986 | 1.25E-61  | 0.55368477 | 0.323 | 0.039 | 2.73E-57  | WHSC1     | 10 | STMN1_T-cy |
| 2987 | 4.47E-130 | 0.55301095 | 0.304 | 0.015 | 9.74E-126 | PRR11     | 10 | STMN1_T-cy |
| 2988 | 3.43E-36  | 0.55216396 | 0.46  | 0.114 | 7.48E-32  | DDB2      | 10 | STMN1_T-cy |
| 2989 | 1.06E-117 | 0.54302969 | 0.335 | 0.021 | 2.31E-113 | FAM64A    | 10 | STMN1_T-cy |
| 2990 | 2.94E-89  | 0.54225012 | 0.317 | 0.026 | 6.42E-85  | FAM83D    | 10 | STMN1_T-cy |
| 2991 | 4.61E-28  | 0.54141194 | 0.497 | 0.153 | 1.00E-23  | USP1      | 10 | STMN1_T-cy |
| 2992 | 2.39E-117 | 0.53882496 | 0.354 | 0.024 | 5.22E-113 | NCAPG2    | 10 | STMN1_T-cy |
| 2993 | 3.86E-25  | 0.5367967  | 0.323 | 0.082 | 8.42E-21  | MCM7      | 10 | STMN1_T-cy |
| 2994 | 2.33E-150 | 0.53644547 | 0.311 | 0.012 | 5.07E-146 | DIAPH3    | 10 | STMN1_T-cy |
| 2995 | 1.06E-33  | 0.53498481 | 0.665 | 0.209 | 2.30E-29  | DDX39A    | 10 | STMN1_T-cy |
| 2996 | 5.15E-139 | 0.53427687 | 0.261 | 0.009 | 1.12E-134 | IL26      | 10 | STMN1_T-cy |
| 2997 | 5.80E-139 | 0.53040953 | 0.323 | 0.015 | 1.26E-134 | PSRC1     | 10 | STMN1_T-cy |
| 2998 | 5.00E-83  | 0.52963315 | 0.422 | 0.049 | 1.09E-78  | RPL39L    | 10 | STMN1_T-cy |
| 2999 | 9.90E-51  | 0.52752438 | 0.422 | 0.075 | 2.16E-46  | RRM1      | 10 | STMN1_T-cy |
| 3000 | 9.91E-25  | 0.52728297 | 0.696 | 0.283 | 2.16E-20  | LBR       | 10 | STMN1_T-cy |
| 3001 | 7.10E-124 | 0.52727138 | 0.317 | 0.017 | 1.55E-119 | KNSTRN    | 10 | STMN1_T-cy |
| 3002 | 3.67E-27  | 0.52526994 | 0.814 | 0.353 | 8.00E-23  | SPOCK2    | 10 | STMN1_T-cy |
| 3003 | 3.49E-154 | 0.52392085 | 0.329 | 0.014 | 7.61E-150 | KIF18A    | 10 | STMN1_T-cy |
| 3004 | 8.86E-40  | 0.52271955 | 0.528 | 0.132 | 1.93E-35  | HPGD      | 10 | STMN1_T-cy |
| 3005 | 9.45E-22  | 0.521353   | 0.174 | 0.031 | 2.06E-17  | TRBV6-4   | 10 | STMN1_T-cy |
| 3006 | 9.00E-46  | 0.51952065 | 0.23  | 0.027 | 1.96E-41  | HIST1H2AJ | 10 | STMN1_T-cy |
| 3007 | 2.10E-23  | 0.51547732 | 0.851 | 0.463 | 4.58E-19  | LRRFIP1   | 10 | STMN1_T-cy |
| 3008 | 4.07E-138 | 0.51164822 | 0.317 | 0.015 | 8.87E-134 | NEIL3     | 10 | STMN1_T-cy |

|      |           |            |       |       |             |           |    |            |
|------|-----------|------------|-------|-------|-------------|-----------|----|------------|
| 3009 | 2.19E-15  | 0.51094439 | 0.578 | 0.268 | 4.78E-11    | DUT       | 10 | STMN1_T-cy |
| 3010 | 8.86E-99  | 0.51093008 | 0.335 | 0.026 | 1.93E-94    | ARHGAP11B | 10 | STMN1_T-cy |
| 3011 | 9.06E-126 | 0.50756011 | 0.311 | 0.016 | 1.98E-121   | HMGB3     | 10 | STMN1_T-cy |
| 3012 | 4.99E-113 | 0.50672966 | 0.404 | 0.032 | 1.09E-108   | NRM       | 10 | STMN1_T-cy |
| 3013 | 2.10E-94  | 0.50660367 | 0.273 | 0.017 | 4.59E-90    | HIST1H1B  | 10 | STMN1_T-cy |
| 3014 | 1.43E-55  | 0.50578859 | 0.453 | 0.078 | 3.13E-51    | RUVBL2    | 10 | STMN1_T-cy |
| 3015 | 6.09E-45  | 0.50510694 | 0.429 | 0.085 | 1.33E-40    | NUDT1     | 10 | STMN1_T-cy |
| 3016 | 7.65E-66  | 0.50498126 | 0.273 | 0.026 | 1.67E-61    | TCF19     | 10 | STMN1_T-cy |
| 3017 | 2.50E-89  | 0.50257948 | 0.323 | 0.027 | 5.46E-85    | GGH       | 10 | STMN1_T-cy |
| 3018 | 2.48E-116 | 0.49827234 | 0.304 | 0.017 | 5.42E-112   | APOBEC3B  | 10 | STMN1_T-cy |
| 3019 | 2.58E-160 | 0.49720025 | 0.366 | 0.017 | 5.62E-156   | KIAA1524  | 10 | STMN1_T-cy |
| 3020 | 2.53E-134 | 0.49499397 | 0.304 | 0.014 | 5.51E-130   | SHCBP1    | 10 | STMN1_T-cy |
| 3021 | 1.02E-32  | 0.494664   | 0.559 | 0.163 | 2.22E-28    | TMEM71    | 10 | STMN1_T-cy |
| 3022 | 9.01E-56  | 0.488866   | 0.416 | 0.068 | 1.97E-51    | HDGF      | 10 | STMN1_T-cy |
| 3023 | 6.58E-130 | 0.48818689 | 0.28  | 0.012 | 1.43E-125   | MND1      | 10 | STMN1_T-cy |
| 3024 | 2.06E-163 | 0.48684423 | 0.329 | 0.013 | 4.50E-159   | BUB1B     | 10 | STMN1_T-cy |
| 3025 | 2.61E-103 | 0.48559577 | 0.304 | 0.02  | 5.69E-99    | LMO7      | 10 | STMN1_T-cy |
| 3026 | 4.81E-29  | 0.48490908 | 0.665 | 0.23  | 1.05E-24    | CLEC2D    | 10 | STMN1_T-cy |
| 3027 | 1.50E-140 | 0.4845746  | 0.311 | 0.014 | 3.26E-136   | PBK       | 10 | STMN1_T-cy |
| 3028 | 5.90E-106 | 0.48158952 | 0.298 | 0.018 | 1.29E-101   | ARHGEF39  | 10 | STMN1_T-cy |
| 3029 | 5.20E-50  | 0.48119793 | 0.273 | 0.035 | 1.13E-45    | DHFR      | 10 | STMN1_T-cy |
| 3030 | 2.48E-48  | 0.47707971 | 0.404 | 0.072 | 5.41E-44    | RANGAP1   | 10 | STMN1_T-cy |
| 3031 | 1.85E-31  | 0.47696207 | 0.634 | 0.2   | 4.03E-27    | ANXA5     | 10 | STMN1_T-cy |
| 3032 | 2.59E-19  | 0.47499659 | 0.733 | 0.341 | 5.66E-15    | SFPQ      | 10 | STMN1_T-cy |
| 3033 | 7.41E-27  | 0.47495592 | 0.658 | 0.242 | 1.62E-22    | ILF2      | 10 | STMN1_T-cy |
| 3034 | 2.24E-82  | 0.47477483 | 0.23  | 0.014 | 4.88E-78    | ATP8B3    | 10 | STMN1_T-cy |
| 3035 | 1.43E-23  | 0.47157931 | 0.366 | 0.103 | 3.11E-19    | HIST1H1C  | 10 | STMN1_T-cy |
| 3036 | 6.96E-35  | 0.46947681 | 0.36  | 0.076 | 1.52E-30    | LINC00649 | 10 | STMN1_T-cy |
| 3037 | 1.27E-125 | 0.46829541 | 0.292 | 0.014 | 2.77E-121   | MELK      | 10 | STMN1_T-cy |
| 3038 | 3.71E-90  | 0.46756267 | 0.317 | 0.025 | 8.10E-86    | FANCI     | 10 | STMN1_T-cy |
| 3039 | 1.08E-188 | 0.46604197 | 0.298 | 0.008 | 2.35E-184   | CIT       | 10 | STMN1_T-cy |
| 3040 | 1.43E-23  | 0.46491325 | 0.764 | 0.34  | 3.12E-19    | SDCBP     | 10 | STMN1_T-cy |
| 3041 | 5.31E-86  | 0.46397904 | 0.242 | 0.015 | 1.16E-81    | ESCO2     | 10 | STMN1_T-cy |
| 3042 | 1.18E-30  | 0.46288946 | 0.478 | 0.132 | 2.58E-26    | TMEM107   | 10 | STMN1_T-cy |
| 3043 | 8.23E-64  | 0.46147399 | 0.36  | 0.046 | 1.79E-59    | EMC9      | 10 | STMN1_T-cy |
| 3044 | 1.51E-64  | 0.4612712  | 0.404 | 0.056 | 3.29E-60    | REEP4     | 10 | STMN1_T-cy |
| 3045 | 2.07E-27  | 0.45732862 | 0.404 | 0.108 | 4.51E-23    | SMC1A     | 10 | STMN1_T-cy |
| 3046 | 8.89E-32  | 0.45448529 | 0.373 | 0.087 | 1.94E-27    | DNAJC9    | 10 | STMN1_T-cy |
| 3047 | 1.01E-45  | 0.45163262 | 0.298 | 0.044 | 2.21E-41    | CAPG      | 10 | STMN1_T-cy |
| 3048 | 5.38E-92  | 0.45156838 | 0.304 | 0.023 | 1.17E-87    | SPDL1     | 10 | STMN1_T-cy |
| 3049 | 7.11E-41  | 0.44893934 | 0.205 | 0.024 | 1.55E-36    | CLSPN     | 10 | STMN1_T-cy |
| 3050 | 1.74E-23  | 0.44892597 | 0.565 | 0.198 | 3.79E-19    | PRDX3     | 10 | STMN1_T-cy |
| 3051 | 3.16E-16  | 0.44001423 | 0.596 | 0.258 | 6.90E-12    | PTBP3     | 10 | STMN1_T-cy |
| 3052 | 2.42E-45  | 0.43996247 | 0.46  | 0.093 | 5.27E-41    | G2E3      | 10 | STMN1_T-cy |
| 3053 | 5.31E-58  | 0.43925974 | 0.335 | 0.044 | 1.16E-53    | DLEU2     | 10 | STMN1_T-cy |
| 3054 | 1.85E-43  | 0.43728857 | 0.342 | 0.058 | 4.03E-39    | CCDC18    | 10 | STMN1_T-cy |
| 3055 | 3.41E-114 | 0.43694663 | 0.217 | 0.008 | 7.43E-110   | POLQ      | 10 | STMN1_T-cy |
| 3056 | 6.65E-07  | 0.43471022 | 0.981 | 0.85  | 0.0145012   | HSP90AA1  | 10 | STMN1_T-cy |
| 3057 | 2.57E-16  | 0.43395866 | 0.77  | 0.396 | 5.61E-12    | TUBA1A    | 10 | STMN1_T-cy |
| 3058 | 2.33E-10  | 0.43359391 | 0.795 | 0.525 | 5.09E-06    | FOSB      | 10 | STMN1_T-cy |
| 3059 | 8.65E-30  | 0.42968844 | 0.547 | 0.162 | 1.89E-25    | SMS       | 10 | STMN1_T-cy |
| 3060 | 2.23E-58  | 0.42910935 | 0.267 | 0.028 | 4.87E-54    | FBXO5     | 10 | STMN1_T-cy |
| 3061 | 3.83E-33  | 0.42651443 | 0.267 | 0.047 | 8.35E-29    | NCAPD3    | 10 | STMN1_T-cy |
| 3062 | 2.07E-19  | 0.42633446 | 0.534 | 0.204 | 4.51E-15    | NDUFAF3   | 10 | STMN1_T-cy |
| 3063 | 4.12E-23  | 0.4262282  | 0.335 | 0.092 | 8.98E-19    | HIST1H1E  | 10 | STMN1_T-cy |
| 3064 | 2.65E-27  | 0.42615641 | 0.422 | 0.116 | 5.77E-23    | SAE1      | 10 | STMN1_T-cy |
| 3065 | 5.83E-17  | 0.42371223 | 0.82  | 0.435 | 1.27E-12    | YWHAQ     | 10 | STMN1_T-cy |
| 3066 | 2.53E-20  | 0.4236828  | 0.702 | 0.306 | 5.51E-16    | CBX3      | 10 | STMN1_T-cy |
| 3067 | 5.82E-43  | 0.4207245  | 0.292 | 0.044 | 1.27E-38    | CDCA4     | 10 | STMN1_T-cy |
| 3068 | 3.62E-21  | 0.42034787 | 0.677 | 0.276 | 7.89E-17    | NDUFA2    | 10 | STMN1_T-cy |
| 3069 | 6.09E-15  | 0.41697139 | 0.267 | 0.083 | 1.33E-10    | HIST1H1D  | 10 | STMN1_T-cy |
| 3070 | 5.05E-28  | 0.41465407 | 0.46  | 0.13  | 1.10E-23    | NDE1      | 10 | STMN1_T-cy |
| 3071 | 5.59E-19  | 0.4146287  | 0.646 | 0.277 | 1.22E-14    | HSD17B11  | 10 | STMN1_T-cy |
| 3072 | 8.96E-45  | 0.41401911 | 0.503 | 0.108 | 1.95E-40    | TPRKB     | 10 | STMN1_T-cy |
| 3073 | 3.32E-23  | 0.41394722 | 0.484 | 0.159 | 7.24E-19    | SLC7A5    | 10 | STMN1_T-cy |
| 3074 | 2.49E-15  | 0.41291614 | 0.832 | 0.503 | 5.44E-11    | SLC25A5   | 10 | STMN1_T-cy |
| 3075 | 7.13E-14  | 0.41262018 | 0.863 | 0.498 | 1.55E-09    | HNRNPA0   | 10 | STMN1_T-cy |
| 3076 | 2.23E-26  | 0.41147903 | 0.671 | 0.236 | 4.85E-22    | MRPL51    | 10 | STMN1_T-cy |
| 3077 | 2.54E-70  | 0.41059798 | 0.292 | 0.028 | 5.54E-66    | CENPH     | 10 | STMN1_T-cy |
| 3078 | 9.20E-09  | 0.40901199 | 0.534 | 0.292 | 0.000200665 | EGR1      | 10 | STMN1_T-cy |

|      |           |            |       |       |           |               |    |                 |
|------|-----------|------------|-------|-------|-----------|---------------|----|-----------------|
| 3079 | 1.47E-123 | 0.40825229 | 0.255 | 0.01  | 3.20E-119 | FAM72B        | 10 | STMN1_T-cycling |
| 3080 | 4.34E-33  | 0.40762263 | 0.373 | 0.082 | 9.46E-29  | VRK1          | 10 | STMN1_T-cycling |
| 3081 | 2.97E-38  | 0.40703845 | 0.317 | 0.056 | 6.47E-34  | ITGB3BP       | 10 | STMN1_T-cycling |
| 3082 | 3.91E-29  | 0.40415933 | 0.36  | 0.086 | 8.54E-25  | TMEM106C      | 10 | STMN1_T-cycling |
| 3083 | 1.79E-31  | 0.40280135 | 0.41  | 0.1   | 3.91E-27  | PRPSAP1       | 10 | STMN1_T-cycling |
| 3084 | 3.57E-123 | 0.40091358 | 0.273 | 0.012 | 7.79E-119 | POC1A         | 10 | STMN1_T-cycling |
| 3085 | 4.89E-15  | 0.39644729 | 0.348 | 0.124 | 1.07E-10  | RNU12         | 10 | STMN1_T-cycling |
| 3086 | 4.61E-42  | 0.39584455 | 0.199 | 0.022 | 1.01E-37  | HIST1H2AI     | 10 | STMN1_T-cycling |
| 3087 | 1.21E-100 | 0.39524752 | 0.242 | 0.012 | 2.63E-96  | SKA3          | 10 | STMN1_T-cycling |
| 3088 | 2.11E-25  | 0.39514697 | 0.503 | 0.157 | 4.61E-21  | RPA3          | 10 | STMN1_T-cycling |
| 3089 | 1.50E-28  | 0.39399301 | 0.484 | 0.137 | 3.28E-24  | ARL4A         | 10 | STMN1_T-cycling |
| 3090 | 2.86E-23  | 0.39271452 | 0.478 | 0.154 | 6.24E-19  | IFI6          | 10 | STMN1_T-cycling |
| 3091 | 2.61E-17  | 0.39175163 | 0.602 | 0.258 | 5.69E-13  | CDKN1A        | 10 | STMN1_T-cycling |
| 3092 | 1.06E-15  | 0.39002904 | 0.77  | 0.38  | 2.31E-11  | RBMX          | 10 | STMN1_T-cycling |
| 3093 | 1.19E-20  | 0.38935709 | 0.596 | 0.231 | 2.60E-16  | CCNG1         | 10 | STMN1_T-cycling |
| 3094 | 5.06E-45  | 0.38744019 | 0.317 | 0.049 | 1.10E-40  | BCL2L12       | 10 | STMN1_T-cycling |
| 3095 | 5.65E-68  | 0.38726188 | 0.217 | 0.016 | 1.23E-63  | ORC6          | 10 | STMN1_T-cycling |
| 3096 | 1.16E-22  | 0.38650079 | 0.441 | 0.138 | 2.53E-18  | XPO1          | 10 | STMN1_T-cycling |
| 3097 | 2.13E-100 | 0.38626217 | 0.236 | 0.011 | 4.65E-96  | STIL          | 10 | STMN1_T-cycling |
| 3098 | 1.18E-45  | 0.38625645 | 0.273 | 0.037 | 2.57E-41  | CCDC88A       | 10 | STMN1_T-cycling |
| 3099 | 4.71E-63  | 0.38622391 | 0.236 | 0.02  | 1.03E-58  | CEP152        | 10 | STMN1_T-cycling |
| 3100 | 6.21E-33  | 0.38477914 | 0.385 | 0.087 | 1.35E-28  | DPP4          | 10 | STMN1_T-cycling |
| 3101 | 2.62E-78  | 0.3837872  | 0.242 | 0.017 | 5.70E-74  | DEPDC1        | 10 | STMN1_T-cycling |
| 3102 | 2.97E-31  | 0.38181202 | 0.453 | 0.117 | 6.47E-27  | IMPDH2        | 10 | STMN1_T-cycling |
| 3103 | 2.17E-17  | 0.3807539  | 0.522 | 0.206 | 4.73E-13  | SIVA1         | 10 | STMN1_T-cycling |
| 3104 | 1.83E-14  | 0.3805294  | 0.745 | 0.38  | 3.98E-10  | SH2D1A        | 10 | STMN1_T-cycling |
| 3105 | 1.09E-26  | 0.38031025 | 0.497 | 0.146 | 2.37E-22  | DCP2          | 10 | STMN1_T-cycling |
| 3106 | 1.13E-21  | 0.38002069 | 0.422 | 0.132 | 2.47E-17  | MAD2L2        | 10 | STMN1_T-cycling |
| 3107 | 1.16E-12  | 0.37843384 | 0.907 | 0.697 | 2.54E-08  | S100A10       | 10 | STMN1_T-cycling |
| 3108 | 5.65E-16  | 0.37689859 | 0.776 | 0.392 | 1.23E-11  | SRP9          | 10 | STMN1_T-cycling |
| 3109 | 7.80E-53  | 0.37605033 | 0.236 | 0.024 | 1.70E-48  | CEP57L1       | 10 | STMN1_T-cycling |
| 3110 | 1.30E-15  | 0.37576716 | 0.665 | 0.317 | 2.84E-11  | TPM4          | 10 | STMN1_T-cycling |
| 3111 | 1.32E-67  | 0.37554091 | 0.242 | 0.02  | 2.88E-63  | INCENP        | 10 | STMN1_T-cycling |
| 3112 | 4.21E-59  | 0.37532135 | 0.161 | 0.01  | 9.19E-55  | FAM111B       | 10 | STMN1_T-cycling |
| 3113 | 1.23E-17  | 0.37485907 | 0.783 | 0.375 | 2.68E-13  | ATP5F1        | 10 | STMN1_T-cycling |
| 3114 | 1.03E-68  | 0.37364535 | 0.23  | 0.017 | 2.25E-64  | CBR3          | 10 | STMN1_T-cycling |
| 3115 | 1.51E-26  | 0.37362673 | 0.565 | 0.18  | 3.30E-22  | FBXL5         | 10 | STMN1_T-cycling |
| 3116 | 4.37E-20  | 0.37329809 | 0.988 | 0.86  | 9.52E-16  | HNRNPA1       | 10 | STMN1_T-cycling |
| 3117 | 1.44E-92  | 0.37318879 | 0.211 | 0.01  | 3.15E-88  | KIF18B        | 10 | STMN1_T-cycling |
| 3118 | 4.28E-58  | 0.37258308 | 0.242 | 0.023 | 9.32E-54  | ARHGAP19      | 10 | STMN1_T-cycling |
| 3119 | 9.09E-26  | 0.37166804 | 0.354 | 0.09  | 1.98E-21  | UBALD2        | 10 | STMN1_T-cycling |
| 3120 | 2.97E-24  | 0.3694421  | 0.28  | 0.064 | 6.47E-20  | SPRY1         | 10 | STMN1_T-cycling |
| 3121 | 1.14E-14  | 0.36899098 | 0.994 | 0.959 | 2.49E-10  | ACTG1         | 10 | STMN1_T-cycling |
| 3122 | 3.85E-16  | 0.36794288 | 0.696 | 0.318 | 8.40E-12  | KLRG1         | 10 | STMN1_T-cycling |
| 3123 | 2.46E-52  | 0.36588281 | 0.211 | 0.02  | 5.36E-48  | ATAD5         | 10 | STMN1_T-cycling |
| 3124 | 2.39E-16  | 0.36525267 | 0.329 | 0.108 | 5.20E-12  | IKBIP         | 10 | STMN1_T-cycling |
| 3125 | 3.98E-25  | 0.36482811 | 0.161 | 0.024 | 8.68E-21  | HELLS         | 10 | STMN1_T-cycling |
| 3126 | 5.31E-23  | 0.36447446 | 0.671 | 0.251 | 1.16E-18  | KHDRBS1       | 10 | STMN1_T-cycling |
| 3127 | 9.08E-87  | 0.3640172  | 0.205 | 0.01  | 1.98E-82  | SMTN          | 10 | STMN1_T-cycling |
| 3128 | 3.63E-14  | 0.36394594 | 0.913 | 0.585 | 7.91E-10  | TMBIM6        | 10 | STMN1_T-cycling |
| 3129 | 3.20E-19  | 0.36353322 | 0.596 | 0.228 | 6.99E-15  | KIF5B         | 10 | STMN1_T-cycling |
| 3130 | 2.27E-25  | 0.36314634 | 0.46  | 0.137 | 4.95E-21  | ARHGEF6       | 10 | STMN1_T-cycling |
| 3131 | 1.52E-17  | 0.36238374 | 0.59  | 0.24  | 3.31E-13  | PNRC2         | 10 | STMN1_T-cycling |
| 3132 | 6.54E-97  | 0.3619177  | 0.248 | 0.014 | 1.43E-92  | FOXM1         | 10 | STMN1_T-cycling |
| 3133 | 6.66E-46  | 0.36166224 | 0.242 | 0.029 | 1.45E-41  | CEP70         | 10 | STMN1_T-cycling |
| 3134 | 4.18E-19  | 0.36138645 | 0.273 | 0.073 | 9.11E-15  | CH17-373J23.1 | 10 | STMN1_T-cycling |
| 3135 | 1.49E-12  | 0.36110789 | 0.211 | 0.065 | 3.25E-08  | PTCH2         | 10 | STMN1_T-cycling |
| 3136 | 3.86E-35  | 0.35810423 | 0.354 | 0.072 | 8.42E-31  | ACYP1         | 10 | STMN1_T-cycling |
| 3137 | 1.25E-26  | 0.35676467 | 0.472 | 0.135 | 2.72E-22  | NUDCD2        | 10 | STMN1_T-cycling |
| 3138 | 1.22E-55  | 0.35610328 | 0.211 | 0.018 | 2.66E-51  | CRNDE         | 10 | STMN1_T-cycling |
| 3139 | 9.69E-20  | 0.35571973 | 0.478 | 0.166 | 2.11E-15  | CEP57         | 10 | STMN1_T-cycling |
| 3140 | 2.01E-12  | 0.35403966 | 0.913 | 0.726 | 4.39E-08  | YBX1          | 10 | STMN1_T-cycling |
| 3141 | 1.77E-66  | 0.35298158 | 0.199 | 0.013 | 3.86E-62  | C21orf58      | 10 | STMN1_T-cycling |
| 3142 | 2.43E-84  | 0.35213631 | 0.23  | 0.014 | 5.30E-80  | SKA1          | 10 | STMN1_T-cycling |
| 3143 | 4.80E-95  | 0.34970538 | 0.255 | 0.015 | 1.05E-90  | MFR2          | 10 | STMN1_T-cycling |
| 3144 | 1.51E-28  | 0.34639408 | 0.304 | 0.065 | 3.29E-24  | TOPBP1        | 10 | STMN1_T-cycling |
| 3145 | 6.50E-32  | 0.34621657 | 0.236 | 0.039 | 1.42E-27  | LIG1          | 10 | STMN1_T-cycling |
| 3146 | 5.18E-12  | 0.34591746 | 0.758 | 0.417 | 1.13E-07  | WSB1          | 10 | STMN1_T-cycling |
| 3147 | 2.74E-68  | 0.34539101 | 0.186 | 0.011 | 5.97E-64  | PLK4          | 10 | STMN1_T-cycling |
| 3148 | 4.28E-19  | 0.34530598 | 0.497 | 0.174 | 9.33E-15  | SMC3          | 10 | STMN1_T-cycling |

|      |          |            |       |       |          |             |    |                 |
|------|----------|------------|-------|-------|----------|-------------|----|-----------------|
| 3149 | 7.09E-37 | 0.34522159 | 0.435 | 0.096 | 1.55E-32 | CDC27       | 10 | STMN1_T-cycling |
| 3150 | 7.06E-29 | 0.34520105 | 0.441 | 0.117 | 1.54E-24 | DBF4        | 10 | STMN1_T-cycling |
| 3151 | 2.33E-11 | 0.34431654 | 0.87  | 0.513 | 5.08E-07 | HNRNPA3     | 10 | STMN1_T-cycling |
| 3152 | 4.21E-14 | 0.34194914 | 0.429 | 0.172 | 9.17E-10 | DNMT1       | 10 | STMN1_T-cycling |
| 3153 | 1.50E-20 | 0.34176944 | 0.509 | 0.177 | 3.27E-16 | H2AFY       | 10 | STMN1_T-cycling |
| 3154 | 5.03E-34 | 0.34102384 | 0.354 | 0.074 | 1.10E-29 | METTL10     | 10 | STMN1_T-cycling |
| 3155 | 7.24E-17 | 0.34044961 | 1     | 0.998 | 1.58E-12 | ACTB        | 10 | STMN1_T-cycling |
| 3156 | 6.54E-12 | 0.33977521 | 0.708 | 0.379 | 1.43E-07 | HMGN3       | 10 | STMN1_T-cycling |
| 3157 | 5.20E-15 | 0.3394401  | 0.652 | 0.29  | 1.13E-10 | BANF1       | 10 | STMN1_T-cycling |
| 3158 | 1.46E-10 | 0.33749052 | 0.839 | 0.561 | 3.18E-06 | TNFAIP3     | 10 | STMN1_T-cycling |
| 3159 | 2.10E-10 | 0.33748644 | 0.925 | 0.79  | 4.58E-06 | S100A6      | 10 | STMN1_T-cycling |
| 3160 | 8.01E-22 | 0.33728913 | 0.652 | 0.243 | 1.75E-17 | TMEM123     | 10 | STMN1_T-cycling |
| 3161 | 6.49E-35 | 0.33688306 | 0.354 | 0.072 | 1.42E-30 | ODF2        | 10 | STMN1_T-cycling |
| 3162 | 8.42E-73 | 0.33672574 | 0.23  | 0.016 | 1.84E-68 | CCNF        | 10 | STMN1_T-cycling |
| 3163 | 4.37E-31 | 0.33593272 | 0.46  | 0.118 | 9.54E-27 | TRIM69      | 10 | STMN1_T-cycling |
| 3164 | 1.83E-18 | 0.33518323 | 0.509 | 0.187 | 3.98E-14 | FABP5       | 10 | STMN1_T-cycling |
| 3165 | 7.57E-20 | 0.33501083 | 0.503 | 0.175 | 1.65E-15 | SUMO3       | 10 | STMN1_T-cycling |
| 3166 | 2.41E-21 | 0.33499841 | 0.609 | 0.222 | 5.25E-17 | BLOC1S1     | 10 | STMN1_T-cycling |
| 3167 | 1.83E-25 | 0.33472356 | 0.373 | 0.097 | 4.00E-21 | CD28        | 10 | STMN1_T-cycling |
| 3168 | 3.73E-55 | 0.33451175 | 0.261 | 0.028 | 8.14E-51 | TTF2        | 10 | STMN1_T-cycling |
| 3169 | 7.28E-19 | 0.33434942 | 0.478 | 0.167 | 1.59E-14 | FAS         | 10 | STMN1_T-cycling |
| 3170 | 1.03E-11 | 0.33430027 | 0.901 | 0.743 | 2.24E-07 | CCNI        | 10 | STMN1_T-cycling |
| 3171 | 2.11E-29 | 0.33421767 | 0.292 | 0.06  | 4.60E-25 | HMGXB4      | 10 | STMN1_T-cycling |
| 3172 | 4.19E-70 | 0.33413832 | 0.149 | 0.006 | 9.15E-66 | E2F7        | 10 | STMN1_T-cycling |
| 3173 | 4.88E-22 | 0.33401434 | 0.323 | 0.086 | 1.06E-17 | DES12       | 10 | STMN1_T-cycling |
| 3174 | 3.22E-25 | 0.33329833 | 0.379 | 0.101 | 7.03E-21 | SCLT1       | 10 | STMN1_T-cycling |
| 3175 | 8.40E-36 | 0.33323818 | 0.292 | 0.051 | 1.83E-31 | FGFR10P     | 10 | STMN1_T-cycling |
| 3176 | 8.70E-14 | 0.33299479 | 0.646 | 0.303 | 1.90E-09 | HNRNPR      | 10 | STMN1_T-cycling |
| 3177 | 7.25E-12 | 0.3322323  | 0.255 | 0.089 | 1.58E-07 | FEZ1        | 10 | STMN1_T-cycling |
| 3178 | 5.47E-65 | 0.33123903 | 0.199 | 0.014 | 1.19E-60 | CHEK1       | 10 | STMN1_T-cycling |
| 3179 | 7.34E-12 | 0.33117534 | 0.503 | 0.228 | 1.60E-07 | PSIP1       | 10 | STMN1_T-cycling |
| 3180 | 9.92E-74 | 0.33107326 | 0.23  | 0.016 | 2.16E-69 | FGFR1       | 10 | STMN1_T-cycling |
| 3181 | 7.47E-30 | 0.33102482 | 0.429 | 0.108 | 1.63E-25 | PMVK        | 10 | STMN1_T-cycling |
| 3182 | 2.28E-39 | 0.33097151 | 0.28  | 0.044 | 4.98E-35 | ILVBL       | 10 | STMN1_T-cycling |
| 3183 | 1.97E-40 | 0.32975824 | 0.217 | 0.027 | 4.29E-36 | MASTL       | 10 | STMN1_T-cycling |
| 3184 | 5.68E-35 | 0.32967404 | 0.317 | 0.059 | 1.24E-30 | CBX1        | 10 | STMN1_T-cycling |
| 3185 | 1.93E-11 | 0.32957689 | 0.882 | 0.536 | 4.21E-07 | HSP90B1     | 10 | STMN1_T-cycling |
| 3186 | 4.63E-60 | 0.32922632 | 0.193 | 0.014 | 1.01E-55 | RCCD1       | 10 | STMN1_T-cycling |
| 3187 | 3.09E-74 | 0.32889919 | 0.174 | 0.008 | 6.75E-70 | WDR62       | 10 | STMN1_T-cycling |
| 3188 | 1.21E-24 | 0.32815197 | 0.435 | 0.126 | 2.63E-20 | SYPL1       | 10 | STMN1_T-cycling |
| 3189 | 1.91E-29 | 0.32814314 | 0.317 | 0.068 | 4.16E-25 | BRD8        | 10 | STMN1_T-cycling |
| 3190 | 8.14E-24 | 0.32795593 | 0.311 | 0.076 | 1.78E-19 | ID1         | 10 | STMN1_T-cycling |
| 3191 | 8.15E-17 | 0.32780533 | 0.422 | 0.152 | 1.78E-12 | CEBPD       | 10 | STMN1_T-cycling |
| 3192 | 1.46E-16 | 0.32662121 | 0.453 | 0.167 | 3.18E-12 | AQP3        | 10 | STMN1_T-cycling |
| 3193 | 3.72E-12 | 0.32649589 | 0.826 | 0.497 | 8.11E-08 | RBM3        | 10 | STMN1_T-cycling |
| 3194 | 2.48E-35 | 0.32608783 | 0.255 | 0.041 | 5.41E-31 | LMNB2       | 10 | STMN1_T-cycling |
| 3195 | 2.77E-17 | 0.32505164 | 0.59  | 0.233 | 6.05E-13 | TAF15       | 10 | STMN1_T-cycling |
| 3196 | 6.79E-13 | 0.32426144 | 0.677 | 0.341 | 1.48E-08 | LYAR        | 10 | STMN1_T-cycling |
| 3197 | 1.37E-14 | 0.32409342 | 0.696 | 0.308 | 3.00E-10 | ELOVL5      | 10 | STMN1_T-cycling |
| 3198 | 8.50E-37 | 0.32384165 | 0.304 | 0.053 | 1.85E-32 | GMNN        | 10 | STMN1_T-cycling |
| 3199 | 2.64E-69 | 0.32347666 | 0.199 | 0.012 | 5.76E-65 | ARHGAP33    | 10 | STMN1_T-cycling |
| 3200 | 2.51E-10 | 0.32313716 | 0.348 | 0.151 | 5.47E-06 | KLRC1       | 10 | STMN1_T-cycling |
| 3201 | 9.89E-17 | 0.3213696  | 0.975 | 0.964 | 2.16E-12 | RPLP0       | 10 | STMN1_T-cycling |
| 3202 | 1.14E-25 | 0.3197969  | 0.323 | 0.077 | 2.48E-21 | RSRC1       | 10 | STMN1_T-cycling |
| 3203 | 2.43E-22 | 0.3187258  | 0.565 | 0.192 | 5.30E-18 | CMC2        | 10 | STMN1_T-cycling |
| 3204 | 1.26E-23 | 0.3171957  | 0.398 | 0.112 | 2.75E-19 | PAF1        | 10 | STMN1_T-cycling |
| 3205 | 1.11E-28 | 0.31665843 | 0.261 | 0.05  | 2.42E-24 | CDK5RAP2    | 10 | STMN1_T-cycling |
| 3206 | 3.76E-26 | 0.3142614  | 0.453 | 0.128 | 8.20E-22 | CD5         | 10 | STMN1_T-cycling |
| 3207 | 1.90E-45 | 0.31419037 | 0.217 | 0.024 | 4.13E-41 | ZWILCH      | 10 | STMN1_T-cycling |
| 3208 | 2.49E-19 | 0.31408644 | 0.273 | 0.072 | 5.42E-15 | HLTF        | 10 | STMN1_T-cycling |
| 3209 | 3.19E-26 | 0.31388855 | 0.342 | 0.083 | 6.96E-22 | ZSCAN16-AS1 | 10 | STMN1_T-cycling |
| 3210 | 1.26E-17 | 0.3127639  | 0.342 | 0.108 | 2.76E-13 | SUZ12       | 10 | STMN1_T-cycling |
| 3211 | 7.76E-48 | 0.31155754 | 0.248 | 0.029 | 1.69E-43 | XRCC6BP1    | 10 | STMN1_T-cycling |
| 3212 | 3.10E-13 | 0.31136178 | 0.615 | 0.282 | 6.77E-09 | NONO        | 10 | STMN1_T-cycling |
| 3213 | 5.93E-19 | 0.31068542 | 0.46  | 0.156 | 1.29E-14 | PBX4        | 10 | STMN1_T-cycling |
| 3214 | 2.82E-22 | 0.31060436 | 0.41  | 0.121 | 6.16E-18 | SLC4A10     | 10 | STMN1_T-cycling |
| 3215 | 1.17E-21 | 0.31046105 | 0.373 | 0.107 | 2.56E-17 | NUP50       | 10 | STMN1_T-cycling |
| 3216 | 3.15E-22 | 0.31042129 | 0.453 | 0.141 | 6.88E-18 | MORF4L2     | 10 | STMN1_T-cycling |
| 3217 | 1.41E-24 | 0.3096912  | 0.41  | 0.114 | 3.08E-20 | DAZAP1      | 10 | STMN1_T-cycling |
| 3218 | 2.60E-13 | 0.30834447 | 0.435 | 0.173 | 5.67E-09 | CEP350      | 10 | STMN1_T-cycling |

|      |           |            |       |       |             |          |    |                 |
|------|-----------|------------|-------|-------|-------------|----------|----|-----------------|
| 3219 | 4.15E-09  | 0.30709616 | 0.919 | 0.736 | 9.04E-05    | MYL12B   | 10 | STMN1_T-cycling |
| 3220 | 4.39E-26  | 0.30688443 | 0.329 | 0.078 | 9.57E-22    | TIMM10   | 10 | STMN1_T-cycling |
| 3221 | 1.52E-11  | 0.30613714 | 0.627 | 0.326 | 3.32E-07    | NR4A1    | 10 | STMN1_T-cycling |
| 3222 | 1.46E-21  | 0.30586432 | 0.348 | 0.097 | 3.18E-17    | HPS3     | 10 | STMN1_T-cycling |
| 3223 | 8.59E-13  | 0.30541077 | 0.994 | 0.91  | 1.87E-08    | HSPA8    | 10 | STMN1_T-cycling |
| 3224 | 2.64E-12  | 0.3044809  | 0.963 | 0.861 | 5.75E-08    | H3F3A    | 10 | STMN1_T-cycling |
| 3225 | 3.75E-44  | 0.30425412 | 0.161 | 0.014 | 8.18E-40    | HIST1H3B | 10 | STMN1_T-cycling |
| 3226 | 4.44E-12  | 0.30349537 | 0.764 | 0.402 | 9.69E-08    | FKBP5    | 10 | STMN1_T-cycling |
| 3227 | 4.27E-10  | 0.30339438 | 0.453 | 0.209 | 9.31E-06    | RANBP1   | 10 | STMN1_T-cycling |
| 3228 | 2.17E-21  | 0.30283264 | 0.236 | 0.053 | 4.74E-17    | PLEKHA5  | 10 | STMN1_T-cycling |
| 3229 | 2.41E-32  | 0.30273316 | 0.23  | 0.036 | 5.26E-28    | LIN54    | 10 | STMN1_T-cycling |
| 3230 | 4.94E-26  | 0.30240603 | 0.317 | 0.074 | 1.08E-21    | ANKRD36C | 10 | STMN1_T-cycling |
| 3231 | 5.07E-16  | 0.30235944 | 0.311 | 0.098 | 1.11E-11    | SPAG9    | 10 | STMN1_T-cycling |
| 3232 | 1.01E-18  | 0.30077607 | 0.516 | 0.184 | 2.20E-14    | MED30    | 10 | STMN1_T-cycling |
| 3233 | 8.57E-11  | 0.30049182 | 0.944 | 0.777 | 1.87E-06    | PCBP2    | 10 | STMN1_T-cycling |
| 3234 | 8.75E-14  | 0.30027747 | 0.559 | 0.242 | 1.91E-09    | EIF4A3   | 10 | STMN1_T-cycling |
| 3235 | 2.33E-75  | 0.30019045 | 0.18  | 0.009 | 5.09E-71    | SPC24    | 10 | STMN1_T-cycling |
| 3236 | 1.15E-23  | 0.29956513 | 0.224 | 0.045 | 2.50E-19    | POLH     | 10 | STMN1_T-cycling |
| 3237 | 2.25E-09  | 0.29933424 | 0.77  | 0.454 | 4.90E-05    | EIF3L    | 10 | STMN1_T-cycling |
| 3238 | 1.87E-110 | 0.29903049 | 0.161 | 0.004 | 4.07E-106   | NMU      | 10 | STMN1_T-cycling |
| 3239 | 7.46E-18  | 0.2987919  | 0.54  | 0.203 | 1.63E-13    | DCAF7    | 10 | STMN1_T-cycling |
| 3240 | 6.41E-29  | 0.2984453  | 0.28  | 0.056 | 1.40E-24    | PLIN3    | 10 | STMN1_T-cycling |
| 3241 | 3.93E-46  | 0.29802882 | 0.267 | 0.035 | 8.57E-42    | LRR1     | 10 | STMN1_T-cycling |
| 3242 | 7.43E-12  | 0.29793532 | 0.391 | 0.161 | 1.62E-07    | NAMPT    | 10 | STMN1_T-cycling |
| 3243 | 1.09E-11  | 0.29592801 | 0.708 | 0.37  | 2.37E-07    | UCP2     | 10 | STMN1_T-cycling |
| 3244 | 1.18E-15  | 0.29588949 | 0.59  | 0.244 | 2.57E-11    | VDAC3    | 10 | STMN1_T-cycling |
| 3245 | 2.12E-11  | 0.2948352  | 0.814 | 0.447 | 4.63E-07    | ATPIF1   | 10 | STMN1_T-cycling |
| 3246 | 3.43E-17  | 0.29477769 | 0.609 | 0.24  | 7.49E-13    | MLF2     | 10 | STMN1_T-cycling |
| 3247 | 5.67E-32  | 0.29469946 | 0.379 | 0.084 | 1.24E-27    | TPGS2    | 10 | STMN1_T-cycling |
| 3248 | 2.46E-12  | 0.29319566 | 0.696 | 0.35  | 5.37E-08    | XRCC6    | 10 | STMN1_T-cycling |
| 3249 | 2.99E-09  | 0.2925314  | 0.944 | 0.828 | 6.52E-05    | FOS      | 10 | STMN1_T-cycling |
| 3250 | 2.48E-16  | 0.29204634 | 0.292 | 0.088 | 5.41E-12    | PDS5B    | 10 | STMN1_T-cycling |
| 3251 | 1.20E-13  | 0.29204181 | 0.429 | 0.168 | 2.63E-09    | RNASEH2C | 10 | STMN1_T-cycling |
| 3252 | 1.13E-07  | 0.29174547 | 0.851 | 0.639 | 0.002462753 | C12orf57 | 10 | STMN1_T-cycling |
| 3253 | 5.88E-14  | 0.29103223 | 0.453 | 0.181 | 1.28E-09    | RBBP7    | 10 | STMN1_T-cycling |
| 3254 | 2.30E-63  | 0.29081402 | 0.161 | 0.009 | 5.01E-59    | FBXO43   | 10 | STMN1_T-cycling |
| 3255 | 5.90E-10  | 0.2899606  | 0.845 | 0.519 | 1.29E-05    | ATP5B    | 10 | STMN1_T-cycling |
| 3256 | 2.49E-10  | 0.28969254 | 0.621 | 0.322 | 5.43E-06    | NDUFV2   | 10 | STMN1_T-cycling |
| 3257 | 9.15E-69  | 0.28937458 | 0.149 | 0.007 | 2.00E-64    | HIST1H3G | 10 | STMN1_T-cycling |
| 3258 | 5.95E-14  | 0.28856087 | 0.317 | 0.109 | 1.30E-09    | TRGC2    | 10 | STMN1_T-cycling |
| 3259 | 2.99E-37  | 0.28841287 | 0.224 | 0.03  | 6.52E-33    | CD9      | 10 | STMN1_T-cycling |
| 3260 | 9.28E-20  | 0.28825021 | 0.547 | 0.193 | 2.02E-15    | FXR1     | 10 | STMN1_T-cycling |
| 3261 | 3.40E-26  | 0.28821005 | 0.304 | 0.069 | 7.41E-22    | SNX9     | 10 | STMN1_T-cycling |
| 3262 | 5.76E-14  | 0.28789227 | 0.46  | 0.184 | 1.26E-09    | ANKRD28  | 10 | STMN1_T-cycling |
| 3263 | 8.90E-38  | 0.28761555 | 0.199 | 0.024 | 1.94E-33    | TMEM171  | 10 | STMN1_T-cycling |
| 3264 | 3.94E-20  | 0.28710328 | 0.472 | 0.156 | 8.58E-16    | COX20    | 10 | STMN1_T-cycling |
| 3265 | 3.46E-15  | 0.2863623  | 0.615 | 0.256 | 7.54E-11    | MZT2A    | 10 | STMN1_T-cycling |
| 3266 | 4.60E-21  | 0.28618099 | 0.286 | 0.071 | 1.00E-16    | GOT1     | 10 | STMN1_T-cycling |
| 3267 | 9.54E-32  | 0.2860754  | 0.354 | 0.076 | 2.08E-27    | IMMP1L   | 10 | STMN1_T-cycling |
| 3268 | 2.64E-11  | 0.28596779 | 0.627 | 0.306 | 5.76E-07    | TNFAIP8  | 10 | STMN1_T-cycling |
| 3269 | 8.60E-41  | 0.28412201 | 0.211 | 0.025 | 1.87E-36    | RNF26    | 10 | STMN1_T-cycling |
| 3270 | 4.58E-08  | 0.28409328 | 0.211 | 0.085 | 0.00099806  | MCM3     | 10 | STMN1_T-cycling |
| 3271 | 5.48E-15  | 0.28335446 | 0.609 | 0.259 | 1.19E-10    | ZNF706   | 10 | STMN1_T-cycling |
| 3272 | 1.55E-13  | 0.28301014 | 0.571 | 0.244 | 3.39E-09    | PSMA4    | 10 | STMN1_T-cycling |
| 3273 | 7.73E-16  | 0.28273957 | 0.385 | 0.133 | 1.69E-11    | CEP85L   | 10 | STMN1_T-cycling |
| 3274 | 1.87E-12  | 0.28259582 | 0.696 | 0.35  | 4.08E-08    | HNRNPUL1 | 10 | STMN1_T-cycling |
| 3275 | 6.27E-18  | 0.28235992 | 0.447 | 0.154 | 1.37E-13    | FUBP1    | 10 | STMN1_T-cycling |
| 3276 | 3.17E-09  | 0.28224064 | 0.907 | 0.596 | 6.92E-05    | EMP3     | 10 | STMN1_T-cycling |
| 3277 | 1.07E-31  | 0.28214732 | 0.161 | 0.019 | 2.33E-27    | TK1      | 10 | STMN1_T-cycling |
| 3278 | 4.22E-16  | 0.28049996 | 0.491 | 0.187 | 9.20E-12    | MAZ      | 10 | STMN1_T-cycling |
| 3279 | 2.80E-09  | 0.28041939 | 0.87  | 0.561 | 6.12E-05    | SRSF3    | 10 | STMN1_T-cycling |
| 3280 | 9.46E-09  | 0.27975999 | 0.925 | 0.709 | 0.000206328 | SUMO2    | 10 | STMN1_T-cycling |
| 3281 | 5.68E-19  | 0.27973128 | 0.398 | 0.128 | 1.24E-14    | FAM200B  | 10 | STMN1_T-cycling |
| 3282 | 4.42E-12  | 0.27918745 | 0.609 | 0.296 | 9.64E-08    | GLUL     | 10 | STMN1_T-cycling |
| 3283 | 1.77E-48  | 0.27766039 | 0.211 | 0.021 | 3.87E-44    | ZNF714   | 10 | STMN1_T-cycling |
| 3284 | 1.84E-24  | 0.2772178  | 0.373 | 0.098 | 4.00E-20    | CCDC82   | 10 | STMN1_T-cycling |
| 3285 | 1.58E-28  | 0.27720257 | 0.342 | 0.077 | 3.45E-24    | ANAPC15  | 10 | STMN1_T-cycling |
| 3286 | 1.88E-10  | 0.27702632 | 0.938 | 0.78  | 4.10E-06    | RHOA     | 10 | STMN1_T-cycling |
| 3287 | 3.85E-49  | 0.27688019 | 0.236 | 0.026 | 8.39E-45    | MIS18A   | 10 | STMN1_T-cycling |
| 3288 | 1.23E-08  | 0.27597772 | 0.801 | 0.493 | 0.000267709 | S100A11  | 10 | STMN1_T-cycling |



|      |          |            |       |       |             |               |    |            |
|------|----------|------------|-------|-------|-------------|---------------|----|------------|
| 3289 | 6.21E-19 | 0.27569325 | 0.894 | 0.397 | 1.35E-14    | IL7R          | 10 | STMN1_T-cy |
| 3290 | 3.04E-43 | 0.27552382 | 0.18  | 0.017 | 6.62E-39    | BRCA1         | 10 | STMN1_T-cy |
| 3291 | 2.13E-14 | 0.2751873  | 0.559 | 0.236 | 4.64E-10    | SATB1         | 10 | STMN1_T-cy |
| 3292 | 2.32E-14 | 0.2747153  | 0.54  | 0.225 | 5.07E-10    | SSR3          | 10 | STMN1_T-cy |
| 3293 | 8.57E-53 | 0.27471292 | 0.161 | 0.011 | 1.87E-48    | NUDT6         | 10 | STMN1_T-cy |
| 3294 | 1.22E-24 | 0.27465341 | 0.242 | 0.049 | 2.66E-20    | KATNAL1       | 10 | STMN1_T-cy |
| 3295 | 4.92E-37 | 0.27458914 | 0.23  | 0.032 | 1.07E-32    | RP11-545E17.3 | 10 | STMN1_T-cy |
| 3296 | 5.52E-90 | 0.2742553  | 0.199 | 0.009 | 1.20E-85    | OIP5          | 10 | STMN1_T-cy |
| 3297 | 8.49E-23 | 0.27423072 | 0.323 | 0.083 | 1.85E-18    | CTCF          | 10 | STMN1_T-cy |
| 3298 | 1.68E-50 | 0.27420842 | 0.137 | 0.008 | 3.66E-46    | EXPH5         | 10 | STMN1_T-cy |
| 3299 | 2.13E-09 | 0.27410859 | 0.745 | 0.393 | 4.65E-05    | SNRPG         | 10 | STMN1_T-cy |
| 3300 | 6.63E-34 | 0.27340553 | 0.311 | 0.058 | 1.45E-29    | PERP          | 10 | STMN1_T-cy |
| 3301 | 6.63E-09 | 0.27299679 | 0.739 | 0.447 | 0.000144617 | UXT           | 10 | STMN1_T-cy |
| 3302 | 7.61E-15 | 0.27242892 | 0.23  | 0.065 | 1.66E-10    | ANKRD36       | 10 | STMN1_T-cy |
| 3303 | 1.72E-16 | 0.27206195 | 0.211 | 0.053 | 3.76E-12    | IL23R         | 10 | STMN1_T-cy |
| 3304 | 7.43E-09 | 0.27121196 | 0.863 | 0.554 | 0.000162075 | LDHA          | 10 | STMN1_T-cy |
| 3305 | 2.19E-40 | 0.26958156 | 0.205 | 0.024 | 4.77E-36    | FZR1          | 10 | STMN1_T-cy |
| 3306 | 6.64E-17 | 0.26952438 | 0.447 | 0.16  | 1.45E-12    | TXNDC12       | 10 | STMN1_T-cy |
| 3307 | 5.45E-16 | 0.26948032 | 0.199 | 0.049 | 1.19E-11    | SRGAP2        | 10 | STMN1_T-cy |
| 3308 | 1.12E-18 | 0.26857282 | 0.36  | 0.111 | 2.44E-14    | PSMD14        | 10 | STMN1_T-cy |
| 3309 | 1.36E-24 | 0.26781832 | 0.217 | 0.041 | 2.96E-20    | ZMYM1         | 10 | STMN1_T-cy |
| 3310 | 1.71E-10 | 0.26774061 | 0.963 | 0.943 | 3.73E-06    | PPIA          | 10 | STMN1_T-cy |
| 3311 | 5.93E-26 | 0.2676409  | 0.311 | 0.071 | 1.29E-21    | PHACTR2       | 10 | STMN1_T-cy |
| 3312 | 1.78E-08 | 0.26679223 | 1     | 0.999 | 0.000388328 | MT-CO3        | 10 | STMN1_T-cy |
| 3313 | 4.46E-10 | 0.26642139 | 0.764 | 0.433 | 9.72E-06    | ABRACL        | 10 | STMN1_T-cy |
| 3314 | 4.32E-17 | 0.26587683 | 0.516 | 0.192 | 9.43E-13    | LSM3          | 10 | STMN1_T-cy |
| 3315 | 3.72E-16 | 0.26574689 | 0.335 | 0.108 | 8.11E-12    | IKZF2         | 10 | STMN1_T-cy |
| 3316 | 2.00E-26 | 0.26572644 | 0.311 | 0.07  | 4.37E-22    | ZDHHC12       | 10 | STMN1_T-cy |
| 3317 | 7.00E-24 | 0.26545458 | 0.323 | 0.08  | 1.53E-19    | YEATS4        | 10 | STMN1_T-cy |
| 3318 | 1.25E-14 | 0.26512129 | 0.522 | 0.21  | 2.72E-10    | GNAI3         | 10 | STMN1_T-cy |
| 3319 | 5.11E-30 | 0.26420689 | 0.323 | 0.068 | 1.11E-25    | HADH          | 10 | STMN1_T-cy |
| 3320 | 3.91E-10 | 0.26355316 | 0.646 | 0.325 | 8.52E-06    | ADD3          | 10 | STMN1_T-cy |
| 3321 | 2.10E-19 | 0.26333774 | 0.248 | 0.061 | 4.57E-15    | SLC25A40      | 10 | STMN1_T-cy |
| 3322 | 4.12E-11 | 0.26319555 | 0.745 | 0.384 | 8.99E-07    | ACTR2         | 10 | STMN1_T-cy |
| 3323 | 3.31E-24 | 0.26318163 | 0.447 | 0.13  | 7.22E-20    | TRAV1-2       | 10 | STMN1_T-cy |
| 3324 | 6.14E-24 | 0.26314519 | 0.304 | 0.073 | 1.34E-19    | TMEM14C       | 10 | STMN1_T-cy |
| 3325 | 2.22E-07 | 0.2628535  | 0.106 | 0.031 | 0.004842201 | HIST1H2BH     | 10 | STMN1_T-cy |
| 3326 | 3.96E-16 | 0.26225866 | 0.379 | 0.13  | 8.64E-14    | HINT2         | 10 | STMN1_T-cy |
| 3327 | 1.85E-08 | 0.26223721 | 0.851 | 0.588 | 0.000402529 | SLC25A3       | 10 | STMN1_T-cy |
| 3328 | 3.01E-16 | 0.26152406 | 0.658 | 0.273 | 6.56E-12    | UGP2          | 10 | STMN1_T-cy |
| 3329 | 1.74E-19 | 0.26082145 | 0.391 | 0.12  | 3.81E-15    | FOPNL         | 10 | STMN1_T-cy |
| 3330 | 8.48E-29 | 0.26065993 | 0.186 | 0.027 | 1.85E-24    | FEN1          | 10 | STMN1_T-cy |
| 3331 | 3.17E-34 | 0.26044338 | 0.124 | 0.011 | 6.91E-30    | DTL           | 10 | STMN1_T-cy |
| 3332 | 1.26E-39 | 0.26006883 | 0.211 | 0.026 | 2.75E-35    | SRGAP2C       | 10 | STMN1_T-cy |
| 3333 | 1.11E-07 | 0.25982683 | 0.304 | 0.141 | 0.002428189 | RELB          | 10 | STMN1_T-cy |
| 3334 | 1.40E-20 | 0.2594138  | 0.304 | 0.081 | 3.05E-16    | SEC22C        | 10 | STMN1_T-cy |
| 3335 | 9.24E-12 | 0.25912121 | 0.671 | 0.318 | 2.01E-07    | SUN2          | 10 | STMN1_T-cy |
| 3336 | 1.54E-10 | 0.258859   | 0.553 | 0.26  | 3.37E-06    | ATF7IP        | 10 | STMN1_T-cy |
| 3337 | 7.94E-22 | 0.25878338 | 0.366 | 0.102 | 1.73E-17    | TMEM261       | 10 | STMN1_T-cy |
| 3338 | 1.02E-16 | 0.25873389 | 0.441 | 0.156 | 2.23E-12    | LETMD1        | 10 | STMN1_T-cy |
| 3339 | 5.15E-51 | 0.25836223 | 0.13  | 0.007 | 1.12E-46    | RAD54L        | 10 | STMN1_T-cy |
| 3340 | 2.60E-11 | 0.25755312 | 0.509 | 0.228 | 5.67E-07    | KRAS          | 10 | STMN1_T-cy |
| 3341 | 5.38E-13 | 0.25730356 | 0.342 | 0.126 | 1.17E-08    | PHTF2         | 10 | STMN1_T-cy |
| 3342 | 1.62E-27 | 0.25699778 | 0.168 | 0.024 | 3.54E-23    | RFWD3         | 10 | STMN1_T-cy |
| 3343 | 6.71E-11 | 0.2569466  | 0.317 | 0.124 | 1.46E-06    | CRY1          | 10 | STMN1_T-cy |
| 3344 | 1.20E-21 | 0.25638435 | 0.292 | 0.073 | 2.62E-17    | MICB          | 10 | STMN1_T-cy |
| 3345 | 1.36E-19 | 0.2562754  | 0.36  | 0.107 | 2.96E-15    | RUNX2         | 10 | STMN1_T-cy |
| 3346 | 9.35E-17 | 0.25627026 | 0.373 | 0.124 | 2.04E-12    | MDFIC         | 10 | STMN1_T-cy |
| 3347 | 7.18E-20 | 0.2559937  | 0.503 | 0.17  | 1.57E-15    | TRAT1         | 10 | STMN1_T-cy |
| 3348 | 7.33E-20 | 0.25580749 | 0.13  | 0.02  | 1.60E-15    | NEMP1         | 10 | STMN1_T-cy |
| 3349 | 2.72E-12 | 0.25516485 | 0.267 | 0.09  | 5.94E-08    | OXCT1         | 10 | STMN1_T-cy |
| 3350 | 1.58E-31 | 0.25409991 | 0.161 | 0.019 | 3.44E-27    | CEP85         | 10 | STMN1_T-cy |
| 3351 | 1.20E-08 | 0.25358343 | 0.95  | 0.705 | 0.000262261 | LCP1          | 10 | STMN1_T-cy |
| 3352 | 1.87E-16 | 0.25349318 | 0.547 | 0.209 | 4.08E-12    | PSMB8-AS1     | 10 | STMN1_T-cy |
| 3353 | 1.78E-15 | 0.25347436 | 0.161 | 0.036 | 3.87E-11    | HIST1H2AG     | 10 | STMN1_T-cy |
| 3354 | 1.82E-14 | 0.2532235  | 0.441 | 0.171 | 3.97E-10    | PHLDA1        | 10 | STMN1_T-cy |
| 3355 | 1.39E-13 | 0.25317639 | 0.553 | 0.231 | 3.04E-09    | EIF4E         | 10 | STMN1_T-cy |
| 3356 | 2.84E-10 | 0.25307026 | 0.298 | 0.116 | 6.20E-06    | PBRM1         | 10 | STMN1_T-cy |
| 3357 | 3.61E-08 | 0.2522709  | 0.913 | 0.637 | 0.000787836 | PPP1R15A      | 10 | STMN1_T-cy |
| 3358 | 2.79E-14 | 0.25206279 | 0.609 | 0.266 | 6.08E-10    | CACYBP        | 10 | STMN1_T-cy |

|      |          |             |       |       |             |         |    |                |
|------|----------|-------------|-------|-------|-------------|---------|----|----------------|
| 3359 | 1.73E-41 | 0.25170587  | 0.205 | 0.023 | 3.76E-37    | KMT5A   | 10 | STMN1_T-cyclng |
| 3360 | 1.33E-07 | 0.2512164   | 1     | 0.997 | 0.002909489 | MT-CYB  | 10 | STMN1_T-cyclng |
| 3361 | 1.05E-10 | 0.25115305  | 0.342 | 0.137 | 2.29E-06    | TBC1D5  | 10 | STMN1_T-cyclng |
| 3362 | 2.05E-15 | 0.25080108  | 0.484 | 0.182 | 4.47E-11    | LMAN1   | 10 | STMN1_T-cyclng |
| 3363 | 3.36E-16 | 0.25062363  | 0.261 | 0.074 | 7.33E-12    | HCFC1   | 10 | STMN1_T-cyclng |
| 3364 | 3.04E-11 | 0.2503798   | 0.317 | 0.123 | 6.62E-07    | HPRT1   | 10 | STMN1_T-cyclng |
| 3365 | 3.68E-25 | 0.25020479  | 0.18  | 0.029 | 8.04E-21    | WEE1    | 10 | STMN1_T-cyclng |
| 3366 | 4.26E-18 | 0.2500287   | 0.335 | 0.101 | 9.30E-14    | TIFA    | 10 | STMN1_T-cyclng |
| 3367 | 1.01E-60 | 0.2500176   | 0.149 | 0.008 | 2.21E-56    | DDIAS   | 10 | STMN1_T-cyclng |
| 3368 | 2.96E-07 | -0.25287527 | 0.957 | 0.972 | 0.006444453 | RPL8    | 10 | STMN1_T-cyclng |
| 3369 | 7.92E-09 | -0.2644346  | 0.957 | 0.985 | 0.000172812 | RPS6    | 10 | STMN1_T-cyclng |
| 3370 | 3.11E-13 | -0.28199786 | 0.975 | 0.995 | 6.79E-09    | RPS3    | 10 | STMN1_T-cyclng |
| 3371 | 3.75E-07 | -0.28722993 | 0.876 | 0.894 | 0.008175818 | RPL27   | 10 | STMN1_T-cyclng |
| 3372 | 8.92E-10 | -0.28896972 | 0.913 | 0.983 | 1.94E-05    | RPL21   | 10 | STMN1_T-cyclng |
| 3373 | 2.63E-12 | -0.29099959 | 0.963 | 0.996 | 5.73E-08    | RPL11   | 10 | STMN1_T-cyclng |
| 3374 | 3.41E-14 | -0.29699814 | 0.975 | 0.995 | 7.44E-10    | RPS15   | 10 | STMN1_T-cyclng |
| 3375 | 8.35E-09 | -0.29932485 | 0.95  | 0.962 | 0.000182019 | RPS29   | 10 | STMN1_T-cyclng |
| 3376 | 6.20E-16 | -0.30230051 | 0.981 | 0.999 | 1.35E-11    | RPS15A  | 10 | STMN1_T-cyclng |
| 3377 | 1.06E-09 | -0.31385    | 0.932 | 0.956 | 2.31E-05    | RPS2    | 10 | STMN1_T-cyclng |
| 3378 | 4.68E-12 | -0.3191777  | 0.944 | 0.979 | 1.02E-07    | RPL17   | 10 | STMN1_T-cyclng |
| 3379 | 1.17E-10 | -0.32291141 | 0.932 | 0.978 | 2.54E-06    | RPL36   | 10 | STMN1_T-cyclng |
| 3380 | 2.76E-14 | -0.32513411 | 0.975 | 0.995 | 6.03E-10    | RPL32   | 10 | STMN1_T-cyclng |
| 3381 | 2.19E-12 | -0.32514419 | 0.944 | 0.987 | 4.77E-08    | RPS25   | 10 | STMN1_T-cyclng |
| 3382 | 5.40E-15 | -0.32664832 | 0.969 | 0.992 | 1.18E-10    | RPL18A  | 10 | STMN1_T-cyclng |
| 3383 | 1.84E-14 | -0.33135827 | 0.969 | 0.99  | 4.00E-10    | RPS13   | 10 | STMN1_T-cyclng |
| 3384 | 5.28E-08 | -0.33162621 | 0.882 | 0.867 | 0.001150387 | RPS11   | 10 | STMN1_T-cyclng |
| 3385 | 1.61E-14 | -0.33632196 | 0.925 | 0.987 | 3.51E-10    | RPS10   | 10 | STMN1_T-cyclng |
| 3386 | 1.09E-08 | -0.34075062 | 0.925 | 0.875 | 0.000238646 | PTPRCAP | 10 | STMN1_T-cyclng |
| 3387 | 1.43E-12 | -0.34238613 | 0.938 | 0.957 | 3.12E-08    | RPL24   | 10 | STMN1_T-cyclng |
| 3388 | 1.12E-09 | -0.35007495 | 0.882 | 0.895 | 2.44E-05    | RPL38   | 10 | STMN1_T-cyclng |
| 3389 | 1.95E-15 | -0.35624497 | 0.95  | 0.982 | 4.26E-11    | RPL3    | 10 | STMN1_T-cyclng |
| 3390 | 1.54E-17 | -0.36472195 | 0.975 | 0.998 | 3.36E-13    | RPL39   | 10 | STMN1_T-cyclng |
| 3391 | 2.03E-16 | -0.37734726 | 0.925 | 0.989 | 4.43E-12    | RPL12   | 10 | STMN1_T-cyclng |
| 3392 | 1.96E-16 | -0.37895071 | 0.969 | 0.989 | 4.28E-12    | RPS18   | 10 | STMN1_T-cyclng |
| 3393 | 4.44E-20 | -0.38452386 | 0.969 | 0.996 | 9.68E-16    | RPS28   | 10 | STMN1_T-cyclng |
| 3394 | 1.70E-19 | -0.38516644 | 0.932 | 0.994 | 3.71E-15    | RPS14   | 10 | STMN1_T-cyclng |
| 3395 | 4.55E-23 | -0.38702927 | 0.975 | 0.994 | 9.92E-19    | RPL26   | 10 | STMN1_T-cyclng |
| 3396 | 2.60E-14 | -0.38960939 | 0.944 | 0.96  | 5.66E-10    | RPL22   | 10 | STMN1_T-cyclng |
| 3397 | 1.31E-19 | -0.39137407 | 0.969 | 0.998 | 2.85E-15    | RPL34   | 10 | STMN1_T-cyclng |
| 3398 | 2.29E-23 | -0.39509345 | 0.969 | 0.995 | 5.00E-19    | RPL19   | 10 | STMN1_T-cyclng |
| 3399 | 2.05E-16 | -0.40005432 | 0.919 | 0.974 | 4.48E-12    | RPL5    | 10 | STMN1_T-cyclng |
| 3400 | 3.31E-21 | -0.40041458 | 0.95  | 0.99  | 7.22E-17    | RPL35A  | 10 | STMN1_T-cyclng |
| 3401 | 1.54E-26 | -0.40228512 | 0.994 | 0.998 | 3.36E-22    | RPL10   | 10 | STMN1_T-cyclng |
| 3402 | 3.69E-21 | -0.41872278 | 0.981 | 0.998 | 8.05E-17    | RPS12   | 10 | STMN1_T-cyclng |
| 3403 | 1.21E-17 | -0.42433544 | 0.919 | 0.96  | 2.65E-13    | RPL10A  | 10 | STMN1_T-cyclng |
| 3404 | 6.13E-19 | -0.42734142 | 0.932 | 0.958 | 1.34E-14    | NACA    | 10 | STMN1_T-cyclng |
| 3405 | 1.80E-07 | -0.43370544 | 0.671 | 0.682 | 0.00391954  | CD48    | 10 | STMN1_T-cyclng |
| 3406 | 3.41E-09 | -0.44301896 | 0.783 | 0.738 | 7.43E-05    | CD37    | 10 | STMN1_T-cyclng |
| 3407 | 2.44E-26 | -0.44335793 | 0.994 | 0.997 | 5.31E-22    | RPL13   | 10 | STMN1_T-cyclng |
| 3408 | 1.13E-06 | -0.45917338 | 0.789 | 0.741 | 0.024563731 | CD7     | 10 | STMN1_T-cyclng |
| 3409 | 8.43E-09 | -0.46838144 | 0.627 | 0.661 | 0.000183914 | ALDOA   | 10 | STMN1_T-cyclng |
| 3410 | 4.55E-36 | -0.47429765 | 0.994 | 0.998 | 9.92E-32    | RPS27A  | 10 | STMN1_T-cyclng |
| 3411 | 3.76E-31 | -0.47634589 | 0.95  | 0.99  | 8.21E-27    | RPS24   | 10 | STMN1_T-cyclng |
| 3412 | 1.17E-18 | -0.47993864 | 0.925 | 0.933 | 2.55E-14    | RPL9    | 10 | STMN1_T-cyclng |
| 3413 | 4.00E-11 | -0.50201894 | 0.758 | 0.742 | 8.72E-07    | COMMD6  | 10 | STMN1_T-cyclng |
| 3414 | 3.33E-13 | -0.50349246 | 0.95  | 0.963 | 7.26E-09    | JUNB    | 10 | STMN1_T-cyclng |
| 3415 | 2.93E-39 | -0.54192572 | 0.969 | 0.997 | 6.40E-35    | RPL30   | 10 | STMN1_T-cyclng |
| 3416 | 2.13E-21 | -0.54261981 | 0.888 | 0.923 | 4.64E-17    | RPL41   | 10 | STMN1_T-cyclng |
| 3417 | 2.06E-20 | -0.54515501 | 0.876 | 0.902 | 4.48E-16    | PFDN5   | 10 | STMN1_T-cyclng |
| 3418 | 3.66E-11 | -0.55714854 | 0.789 | 0.825 | 7.98E-07    | TXNIP   | 10 | STMN1_T-cyclng |
| 3419 | 4.26E-11 | -0.57875926 | 0.621 | 0.672 | 9.30E-07    | CCND3   | 10 | STMN1_T-cyclng |
| 3420 | 2.81E-09 | -0.58027422 | 0.528 | 0.606 | 6.13E-05    | RARRES3 | 10 | STMN1_T-cyclng |
| 3421 | 9.21E-08 | -0.60962269 | 0.627 | 0.619 | 0.002009547 | LITAF   | 10 | STMN1_T-cyclng |
| 3422 | 1.17E-08 | -0.62235919 | 0.335 | 0.465 | 0.000255481 | APRT    | 10 | STMN1_T-cyclng |
| 3423 | 1.17E-06 | -0.63228084 | 0.205 | 0.336 | 0.025484292 | MATK    | 10 | STMN1_T-cyclng |
| 3424 | 1.58E-21 | -0.64739273 | 0.919 | 0.906 | 3.45E-17    | CCL5    | 10 | STMN1_T-cyclng |
| 3425 | 1.15E-07 | -0.65260546 | 0.621 | 0.606 | 0.002502748 | CD247   | 10 | STMN1_T-cyclng |
| 3426 | 6.97E-10 | -0.67540117 | 0.429 | 0.538 | 1.52E-05    | GZMM    | 10 | STMN1_T-cyclng |
| 3427 | 1.72E-09 | -0.69636124 | 0.311 | 0.475 | 3.75E-05    | LIMD2   | 10 | STMN1_T-cyclng |
| 3428 | 4.49E-28 | -0.70044224 | 0.919 | 0.948 | 9.79E-24    | IFITM1  | 10 | STMN1_T-cyclng |

|      |          |             |       |       |             |            |    |                 |
|------|----------|-------------|-------|-------|-------------|------------|----|-----------------|
| 3429 | 2.97E-08 | -0.70051458 | 0.236 | 0.389 | 0.000646839 | DOK2       | 10 | STMN1_T-cycling |
| 3430 | 1.68E-19 | -0.71275563 | 0.764 | 0.799 | 3.66E-15    | CYBA       | 10 | STMN1_T-cycling |
| 3431 | 1.55E-53 | -0.71332665 | 0.975 | 0.997 | 3.37E-49    | RPS27      | 10 | STMN1_T-cycling |
| 3432 | 3.08E-56 | -0.74901992 | 0.981 | 0.999 | 6.72E-52    | AC090498.1 | 10 | STMN1_T-cycling |
| 3433 | 2.97E-22 | -0.8044854  | 0.907 | 0.886 | 6.48E-18    | IFITM2     | 10 | STMN1_T-cycling |
| 3434 | 4.06E-38 | -0.81075474 | 0.944 | 0.969 | 8.85E-34    | FTL        | 10 | STMN1_T-cycling |
| 3435 | 6.79E-11 | -0.86609248 | 0.348 | 0.517 | 1.48E-06    | TRBC1      | 10 | STMN1_T-cycling |
| 3436 | 1.45E-11 | -0.89147784 | 0.72  | 0.703 | 3.16E-07    | PRF1       | 10 | STMN1_T-cycling |
| 3437 | 5.07E-19 | -0.89190138 | 0.547 | 0.67  | 1.11E-14    | ITGB2      | 10 | STMN1_T-cycling |
| 3438 | 3.19E-30 | -0.94367283 | 0.795 | 0.87  | 6.95E-26    | CST7       | 10 | STMN1_T-cycling |
| 3439 | 1.45E-42 | -1.0528641  | 0.714 | 0.883 | 3.16E-38    | HCST       | 10 | STMN1_T-cycling |
| 3440 | 6.02E-13 | -1.08823381 | 0.13  | 0.385 | 1.31E-08    | KLRF1      | 10 | STMN1_T-cycling |
| 3441 | 2.00E-09 | -1.09413458 | 0.267 | 0.417 | 4.36E-05    | SPON2      | 10 | STMN1_T-cycling |
| 3442 | 5.44E-26 | -1.24406496 | 0.435 | 0.675 | 1.19E-21    | CTSW       | 10 | STMN1_T-cycling |
| 3443 | 3.16E-20 | -1.30787391 | 0.286 | 0.582 | 6.90E-16    | KLRD1      | 10 | STMN1_T-cycling |
| 3444 | 8.17E-15 | -1.38354241 | 0.236 | 0.475 | 1.78E-10    | TYROBP     | 10 | STMN1_T-cycling |
| 3445 | 1.86E-34 | -1.38557854 | 0.888 | 0.878 | 4.06E-30    | NKG7       | 10 | STMN1_T-cycling |
| 3446 | 1.41E-19 | -1.54563059 | 0.354 | 0.588 | 3.09E-15    | CMC1       | 10 | STMN1_T-cycling |
| 3447 | 2.99E-25 | -1.5771068  | 0.143 | 0.536 | 6.53E-21    | GZMH       | 10 | STMN1_T-cycling |
| 3448 | 2.65E-09 | -1.62073701 | 0.118 | 0.316 | 5.78E-05    | XCL2       | 10 | STMN1_T-cycling |
| 3449 | 1.65E-19 | -1.67671924 | 0.106 | 0.45  | 3.61E-15    | GZMB       | 10 | STMN1_T-cycling |
| 3450 | 0        | 2.26597471  | 0.805 | 0.009 | 0           | TRDV2      | 11 | TRDV2_yδ T      |
| 3451 | 2.39E-95 | 1.62790185  | 0.748 | 0.133 | 5.21E-91    | TRGV9      | 11 | TRDV2_yδ T      |
| 3452 | 2.41E-35 | 1.10868009  | 0.545 | 0.148 | 5.27E-31    | KLRC1      | 11 | TRDV2_yδ T      |
| 3453 | 2.82E-18 | 0.88151271  | 0.463 | 0.175 | 6.15E-14    | TRDC       | 11 | TRDV2_yδ T      |
| 3454 | 9.58E-25 | 0.84151636  | 0.577 | 0.217 | 2.09E-20    | TRAC       | 11 | TRDV2_yδ T      |
| 3455 | 2.14E-15 | 0.56476097  | 0.463 | 0.179 | 4.66E-11    | CD27       | 11 | TRDV2_yδ T      |
| 3456 | 2.32E-15 | 0.5395634   | 0.683 | 0.321 | 5.05E-11    | KLRG1      | 11 | TRDV2_yδ T      |
| 3457 | 1.64E-13 | 0.48508881  | 0.837 | 0.499 | 3.57E-09    | CD3D       | 11 | TRDV2_yδ T      |
| 3458 | 1.66E-08 | 0.45688545  | 0.805 | 0.589 | 0.000361914 | CD52       | 11 | TRDV2_yδ T      |
| 3459 | 1.21E-09 | 0.44321625  | 0.22  | 0.074 | 2.65E-05    | ITM2C      | 11 | TRDV2_yδ T      |
| 3460 | 3.04E-10 | 0.41191362  | 0.642 | 0.364 | 6.63E-06    | CD3G       | 11 | TRDV2_yδ T      |
| 3461 | 1.55E-08 | 0.38384005  | 0.74  | 0.457 | 0.00033757  | GZMK       | 11 | TRDV2_yδ T      |
| 3462 | 5.96E-09 | 0.3555534   | 0.154 | 0.044 | 0.00012993  | SPG20      | 11 | TRDV2_yδ T      |
| 3463 | 3.73E-11 | 0.28575373  | 0.984 | 0.955 | 8.14E-07    | RPS2       | 11 | TRDV2_yδ T      |
| 3464 | 1.41E-08 | 0.28071908  | 0.179 | 0.056 | 0.000306663 | CXCR3      | 11 | TRDV2_yδ T      |
| 3465 | 7.77E-09 | 0.28067186  | 0.13  | 0.033 | 0.000169457 | BTLA       | 11 | TRDV2_yδ T      |
| 3466 | 1.88E-09 | 0.26728549  | 0.171 | 0.049 | 4.10E-05    | IL12RB2    | 11 | TRDV2_yδ T      |
| 3467 | 2.96E-08 | 0.25662061  | 1     | 0.963 | 0.00064588  | RPSA       | 11 | TRDV2_yδ T      |
| 3468 | 4.74E-15 | 0.25279277  | 0.992 | 0.997 | 1.03E-10    | RPS12      | 11 | TRDV2_yδ T      |
| 3469 | 4.01E-09 | -0.77433413 | 0.163 | 0.429 | 8.74E-05    | CD8A       | 11 | TRDV2_yδ T      |
| 3470 | 4.85E-09 | -0.81825335 | 0.22  | 0.474 | 0.000105663 | TYROBP     | 11 | TRDV2_yδ T      |
| 3471 | 1.85E-08 | -1.0766866  | 0.122 | 0.347 | 0.000403323 | FCGR3A     | 11 | TRDV2_yδ T      |
| 3472 | 3.87E-12 | -1.16690647 | 0.341 | 0.587 | 8.45E-08    | CMC1       | 11 | TRDV2_yδ T      |

**Table 15: List of DEGs of NK/T cell clusters in reperfusion stage (PR versus EP)**

List of differentially expressed genes of CD8B CD8 Tem in reperfusion stage (PR versus EP)

| gene     | p_val    | avg_logFC    | pct.1 | pct.2 | p_val_adj |
|----------|----------|--------------|-------|-------|-----------|
| HSPD1    | 8.05E-51 | 2.222933777  | 0.711 | 0.251 | 1.76E-46  |
| ACTB     | 1.63E-45 | -0.589868612 | 0.963 | 1     | 3.55E-41  |
| CREM     | 5.04E-43 | 1.236624637  | 0.678 | 0.199 | 1.10E-38  |
| HSPH1    | 2.34E-38 | 1.74646851   | 0.579 | 0.157 | 5.09E-34  |
| PFN1     | 1.28E-36 | -0.601476178 | 0.868 | 0.982 | 2.79E-32  |
| SRGN     | 3.52E-36 | 0.646933929  | 0.985 | 0.944 | 7.68E-32  |
| HSP90AA1 | 7.47E-36 | 1.540630962  | 0.923 | 0.819 | 1.63E-31  |
| HSPE1    | 4.73E-32 | 1.623968582  | 0.718 | 0.4   | 1.03E-27  |
| MYL12A   | 2.70E-31 | -0.738624215 | 0.608 | 0.884 | 5.88E-27  |
| HSPB1    | 2.95E-30 | 1.391570374  | 0.597 | 0.23  | 6.43E-26  |
| FAM177A1 | 6.94E-30 | 1.131688519  | 0.564 | 0.188 | 1.51E-25  |
| CORO1A   | 1.26E-29 | -0.851627765 | 0.458 | 0.785 | 2.74E-25  |
| LDHA     | 7.63E-27 | 0.84027034   | 0.711 | 0.378 | 1.66E-22  |
| LITAF    | 2.68E-26 | 0.827102215  | 0.733 | 0.389 | 5.84E-22  |
| HLA-B    | 2.90E-26 | 0.380769826  | 1     | 0.996 | 6.32E-22  |
| HSP90AB1 | 1.35E-25 | 0.984542631  | 0.868 | 0.676 | 2.95E-21  |
| SARAF    | 2.58E-25 | 0.577287326  | 0.945 | 0.83  | 5.62E-21  |
| GZMA     | 8.46E-24 | -0.630942791 | 0.615 | 0.859 | 1.85E-19  |
| CCND3    | 1.16E-23 | -0.795979519 | 0.278 | 0.647 | 2.53E-19  |
| HBB      | 1.26E-22 | -1.152208716 | 0.088 | 0.432 | 2.76E-18  |
| DEFA3    | 3.29E-22 | -1.089053543 | 0.051 | 0.378 | 7.18E-18  |
| RPS29    | 4.33E-22 | 0.406228788  | 0.985 | 0.962 | 9.44E-18  |
| BATF     | 1.58E-21 | 0.93330058   | 0.52  | 0.213 | 3.45E-17  |
| HCST     | 3.74E-21 | -0.535016737 | 0.681 | 0.902 | 8.17E-17  |
| TNFAIP3  | 1.35E-20 | 0.734567212  | 0.637 | 0.3   | 2.94E-16  |
| ATP1B3   | 1.51E-20 | 0.950103416  | 0.392 | 0.107 | 3.28E-16  |
| PPP1R18  | 1.94E-20 | -0.887145114 | 0.147 | 0.474 | 4.23E-16  |
| SH2D2A   | 1.33E-19 | 0.823427049  | 0.469 | 0.177 | 2.89E-15  |
| CD7      | 3.49E-19 | 0.820749222  | 0.696 | 0.443 | 7.61E-15  |
| H3F3B    | 1.19E-18 | 0.46540319   | 0.993 | 0.931 | 2.59E-14  |
| IGLV2-14 | 1.22E-18 | -0.886812772 | 0.04  | 0.313 | 2.66E-14  |
| FTH1     | 1.54E-18 | 0.7771178    | 0.952 | 0.928 | 3.35E-14  |
| RELB     | 7.51E-18 | 0.74837701   | 0.245 | 0.036 | 1.64E-13  |
| NOP58    | 8.44E-18 | 0.799171606  | 0.469 | 0.188 | 1.84E-13  |
| PTPRCAP  | 4.76E-17 | -0.513656173 | 0.685 | 0.837 | 1.04E-12  |
| GZMB     | 8.39E-17 | 1.1878217    | 0.333 | 0.098 | 1.83E-12  |
| AIM1     | 1.24E-16 | 0.796896877  | 0.462 | 0.186 | 2.71E-12  |
| SYAP1    | 5.41E-16 | 0.825821332  | 0.355 | 0.112 | 1.18E-11  |
| PRF1     | 7.39E-16 | 0.872442775  | 0.553 | 0.32  | 1.61E-11  |
| HMGB2    | 3.22E-15 | 0.868052224  | 0.48  | 0.235 | 7.03E-11  |
| LMNA     | 7.16E-15 | 0.81495689   | 0.216 | 0.036 | 1.56E-10  |
| HSPA1A   | 7.52E-15 | 1.497939655  | 0.656 | 0.432 | 1.64E-10  |
| CLIC1    | 1.20E-14 | -0.516054917 | 0.491 | 0.711 | 2.62E-10  |
| EML4     | 3.84E-14 | 0.64558613   | 0.509 | 0.257 | 8.38E-10  |
| GPSM3    | 4.08E-14 | -0.646995883 | 0.282 | 0.541 | 8.91E-10  |
| TNFRSF9  | 4.62E-14 | 0.739828182  | 0.264 | 0.065 | 1.01E-09  |
| LEPROTL1 | 7.21E-14 | 0.684974729  | 0.597 | 0.367 | 1.57E-09  |
| EZR      | 1.16E-13 | 0.778797977  | 0.549 | 0.32  | 2.53E-09  |
| DENND2D  | 1.24E-13 | -0.819726694 | 0.125 | 0.369 | 2.71E-09  |
| PIK3R1   | 1.79E-13 | 0.577709406  | 0.696 | 0.452 | 3.89E-09  |
| CKLF     | 3.35E-13 | -0.669145027 | 0.176 | 0.432 | 7.30E-09  |
| FKBP4    | 3.38E-13 | 0.82855746   | 0.238 | 0.058 | 7.38E-09  |
| DNAJB6   | 4.50E-13 | 0.747762081  | 0.509 | 0.28  | 9.82E-09  |
| PTMA     | 6.14E-13 | 0.31719806   | 1     | 0.971 | 1.34E-08  |
| SOCS3    | 6.92E-13 | 0.661181578  | 0.278 | 0.083 | 1.51E-08  |
| PDLIM2   | 6.99E-13 | -0.680935072 | 0.062 | 0.277 | 1.52E-08  |
| SLC7A5   | 7.06E-13 | 0.737894538  | 0.267 | 0.078 | 1.54E-08  |
| SOD1     | 7.11E-13 | 0.699227052  | 0.656 | 0.445 | 1.55E-08  |
| IFITM1   | 7.81E-13 | 0.473897394  | 0.901 | 0.861 | 1.70E-08  |
| GPR171   | 1.24E-12 | 0.702940472  | 0.3   | 0.098 | 2.71E-08  |
| PFKFB3   | 3.12E-12 | 0.611270615  | 0.201 | 0.04  | 6.80E-08  |
| S100A4   | 3.15E-12 | -0.524164258 | 0.535 | 0.736 | 6.86E-08  |
| IGKV4-1  | 4.70E-12 | -0.728815577 | 0.084 | 0.302 | 1.02E-07  |
| IL10     | 8.65E-12 | 1.064871893  | 0.154 | 0.02  | 1.89E-07  |
| TBC1D10C | 9.25E-12 | -0.624894925 | 0.147 | 0.383 | 2.02E-07  |
| CD3E     | 1.05E-11 | -0.335953335 | 0.868 | 0.931 | 2.30E-07  |
| SLC9A3R1 | 1.28E-11 | -0.54748326  | 0.22  | 0.463 | 2.78E-07  |

|            |          |              |       |       |             |
|------------|----------|--------------|-------|-------|-------------|
| DDX24      | 1.51E-11 | 0.5450586    | 0.582 | 0.349 | 3.30E-07    |
| MTHFD2     | 1.69E-11 | 0.712756052  | 0.311 | 0.121 | 3.69E-07    |
| SH3BGRL3   | 1.78E-11 | -0.351588899 | 0.725 | 0.89  | 3.89E-07    |
| CNOT6L     | 2.11E-11 | 0.61865655   | 0.469 | 0.255 | 4.61E-07    |
| IFITM2     | 2.34E-11 | 0.590850772  | 0.795 | 0.689 | 5.10E-07    |
| S100A8     | 5.49E-11 | -0.731778063 | 0.168 | 0.418 | 1.20E-06    |
| BCL3       | 6.44E-11 | 0.486286361  | 0.147 | 0.02  | 1.40E-06    |
| SH3BP1     | 7.81E-11 | -0.625599727 | 0.04  | 0.215 | 1.70E-06    |
| SELK       | 8.98E-11 | 0.596133987  | 0.491 | 0.293 | 1.96E-06    |
| ACAP1      | 9.90E-11 | -0.559701269 | 0.275 | 0.506 | 2.16E-06    |
| PPP1CB     | 1.03E-10 | 0.568022692  | 0.333 | 0.136 | 2.25E-06    |
| STAT3      | 1.09E-10 | 0.568849332  | 0.476 | 0.264 | 2.37E-06    |
| ISG20      | 1.28E-10 | 0.546420566  | 0.659 | 0.499 | 2.80E-06    |
| ARID5A     | 1.37E-10 | 0.616183705  | 0.363 | 0.161 | 2.98E-06    |
| PTPN6      | 1.68E-10 | -0.557245876 | 0.081 | 0.28  | 3.66E-06    |
| TRAF3IP3   | 1.69E-10 | -0.60243535  | 0.114 | 0.324 | 3.68E-06    |
| GZMK       | 1.90E-10 | -0.40602238  | 0.667 | 0.828 | 4.15E-06    |
| LCK        | 2.01E-10 | -0.486736568 | 0.326 | 0.55  | 4.39E-06    |
| LAT        | 2.30E-10 | -0.531661218 | 0.147 | 0.365 | 5.01E-06    |
| USP36      | 2.54E-10 | 0.549043863  | 0.26  | 0.087 | 5.53E-06    |
| TSPYL2     | 3.24E-10 | 0.647050401  | 0.513 | 0.302 | 7.06E-06    |
| IGKV3-15   | 3.86E-10 | -0.632172913 | 0.007 | 0.148 | 8.42E-06    |
| IRF1       | 3.86E-10 | 0.58388313   | 0.513 | 0.306 | 8.43E-06    |
| ODC1       | 4.29E-10 | 0.578678969  | 0.355 | 0.163 | 9.35E-06    |
| ODF3B      | 4.78E-10 | 0.435509727  | 0.143 | 0.022 | 1.04E-05    |
| SRRT       | 5.20E-10 | 0.586735227  | 0.436 | 0.235 | 1.13E-05    |
| CACYBP     | 5.77E-10 | 0.811280094  | 0.407 | 0.219 | 1.26E-05    |
| C19orf60   | 6.37E-10 | -0.554847421 | 0.165 | 0.376 | 1.39E-05    |
| MAP3K8     | 7.12E-10 | 0.646209639  | 0.396 | 0.206 | 1.55E-05    |
| RHBDD2     | 8.02E-10 | 0.472842986  | 0.267 | 0.092 | 1.75E-05    |
| ITGB2      | 8.04E-10 | -0.48646711  | 0.37  | 0.593 | 1.75E-05    |
| LIME1      | 9.91E-10 | -0.551216404 | 0.15  | 0.358 | 2.16E-05    |
| EIF1       | 1.19E-09 | 0.259879053  | 0.989 | 0.982 | 2.59E-05    |
| UBB        | 1.38E-09 | 0.421878434  | 0.872 | 0.718 | 3.01E-05    |
| ANXA1      | 1.65E-09 | 0.758998004  | 0.542 | 0.331 | 3.59E-05    |
| TAGLN2     | 1.73E-09 | 0.575039782  | 0.575 | 0.383 | 3.76E-05    |
| ARID5B     | 1.97E-09 | 0.561897064  | 0.286 | 0.11  | 4.29E-05    |
| CD27       | 2.15E-09 | -0.570932364 | 0.183 | 0.391 | 4.69E-05    |
| RAC2       | 2.81E-09 | -0.379392757 | 0.509 | 0.711 | 6.12E-05    |
| GABARAPL1  | 3.24E-09 | 0.552469159  | 0.26  | 0.098 | 7.07E-05    |
| SMAP2      | 3.33E-09 | 0.459766817  | 0.392 | 0.195 | 7.25E-05    |
| RBL2       | 3.35E-09 | -0.620287771 | 0.117 | 0.298 | 7.30E-05    |
| PLEK       | 3.72E-09 | -0.540442519 | 0.114 | 0.304 | 8.10E-05    |
| JUN        | 4.59E-09 | -0.412219455 | 0.736 | 0.848 | 0.00010007  |
| TXNIP      | 4.83E-09 | -0.327638798 | 0.612 | 0.823 | 0.000105425 |
| LCP2       | 4.90E-09 | -0.495666582 | 0.231 | 0.447 | 0.000106765 |
| TMA7       | 5.84E-09 | -0.335040986 | 0.729 | 0.866 | 0.000127302 |
| MT-ATP8    | 6.60E-09 | 0.306540718  | 0.96  | 0.922 | 0.000143993 |
| TIFA       | 6.76E-09 | 0.473783372  | 0.158 | 0.036 | 0.000147362 |
| COX7A2L    | 7.25E-09 | -0.508572525 | 0.154 | 0.349 | 0.000158129 |
| SERPINB9   | 7.67E-09 | 0.489588675  | 0.264 | 0.105 | 0.000167161 |
| RNF19A     | 8.23E-09 | 0.530479478  | 0.377 | 0.192 | 0.000179494 |
| PGK1       | 1.04E-08 | 0.615636411  | 0.527 | 0.374 | 0.000226847 |
| CD99       | 1.63E-08 | -0.301915263 | 0.681 | 0.832 | 0.000356027 |
| GSPT1      | 1.91E-08 | 0.495785499  | 0.209 | 0.069 | 0.00041683  |
| APOBEC3G   | 2.47E-08 | -0.532903382 | 0.099 | 0.268 | 0.000539227 |
| ELL2       | 2.81E-08 | 0.443176483  | 0.194 | 0.06  | 0.000613886 |
| LYST       | 2.82E-08 | 0.459981636  | 0.436 | 0.257 | 0.000615884 |
| AC092580.4 | 2.84E-08 | 0.586357186  | 0.249 | 0.101 | 0.000619227 |
| MCL1       | 2.87E-08 | 0.479588436  | 0.608 | 0.445 | 0.000625429 |
| ATP6V0C    | 3.13E-08 | 0.383204112  | 0.593 | 0.38  | 0.000682517 |
| NFKBIA     | 3.34E-08 | 0.432196948  | 0.773 | 0.613 | 0.000728693 |
| LSP1       | 3.46E-08 | -0.443889986 | 0.399 | 0.564 | 0.000754967 |
| EMD        | 4.44E-08 | 0.480293206  | 0.388 | 0.213 | 0.000968058 |
| SKAP1      | 5.12E-08 | -0.465963048 | 0.238 | 0.434 | 0.001115663 |
| NUDC       | 5.21E-08 | 0.587310914  | 0.322 | 0.154 | 0.001135398 |
| PRDM1      | 5.40E-08 | 0.590692053  | 0.469 | 0.298 | 0.001176898 |
| GIMAP1     | 5.90E-08 | -0.504461395 | 0.168 | 0.353 | 0.001286233 |
| IGLV2-23   | 6.83E-08 | -0.5950803   | 0.062 | 0.21  | 0.001490246 |
| HSPA5      | 7.38E-08 | 0.468966806  | 0.56  | 0.391 | 0.001610331 |

|          |          |              |       |       |             |
|----------|----------|--------------|-------|-------|-------------|
| PPP1R16B | 8.55E-08 | 0.502735353  | 0.165 | 0.049 | 0.00186396  |
| GBP2     | 8.56E-08 | 0.472894711  | 0.264 | 0.116 | 0.001866991 |
| RAP1GDS1 | 8.58E-08 | -0.436933054 | 0.055 | 0.201 | 0.001870518 |
| DDIT4    | 9.15E-08 | 0.374784969  | 0.766 | 0.64  | 0.001994359 |
| MCOLN2   | 1.04E-07 | 0.44883009   | 0.212 | 0.076 | 0.002271519 |
| CFL1     | 1.11E-07 | -0.250730961 | 0.81  | 0.89  | 0.002426915 |
| FAM173A  | 1.45E-07 | -0.440163413 | 0.022 | 0.141 | 0.003154342 |
| TRAC     | 1.55E-07 | -0.508758533 | 0.128 | 0.293 | 0.003384714 |
| BIRC3    | 1.79E-07 | 0.510729252  | 0.267 | 0.121 | 0.003894042 |
| PDE4D    | 1.91E-07 | 0.388314675  | 0.168 | 0.051 | 0.004164837 |
| EVL      | 2.16E-07 | -0.41712894  | 0.366 | 0.539 | 0.00471675  |
| SASH3    | 2.29E-07 | -0.476403439 | 0.117 | 0.28  | 0.004991678 |
| DHCR7    | 2.47E-07 | 0.357862011  | 0.128 | 0.029 | 0.005383793 |
| SBNO2    | 2.49E-07 | 0.385509046  | 0.114 | 0.022 | 0.005434075 |
| IGKV2-30 | 3.09E-07 | -0.525873718 | 0.088 | 0.235 | 0.006732602 |
| BAZ1A    | 3.17E-07 | 0.451241708  | 0.363 | 0.197 | 0.006919927 |
| SPOCK2   | 3.30E-07 | 0.47470438   | 0.33  | 0.177 | 0.007194046 |
| DDX21    | 3.67E-07 | 0.500850275  | 0.366 | 0.213 | 0.008003832 |
| SDCBP    | 4.11E-07 | 0.462549049  | 0.377 | 0.219 | 0.008972121 |
| TUBB4B   | 4.38E-07 | 0.371098309  | 0.637 | 0.459 | 0.00954722  |
| NFATC1   | 4.41E-07 | 0.437886991  | 0.139 | 0.038 | 0.009622219 |
| RCSD1    | 4.43E-07 | -0.442956477 | 0.143 | 0.304 | 0.009666    |
| SIT1     | 4.99E-07 | -0.498580134 | 0.092 | 0.237 | 0.010879848 |
| DCK      | 5.28E-07 | -0.44849156  | 0.092 | 0.242 | 0.011517805 |
| ROMO1    | 5.46E-07 | 0.450841187  | 0.436 | 0.275 | 0.01190682  |
| PDCL3    | 5.96E-07 | 0.448988245  | 0.212 | 0.085 | 0.013005659 |
| CSK      | 6.24E-07 | -0.423076447 | 0.128 | 0.289 | 0.01360364  |
| ALB      | 7.01E-07 | 0.31691141   | 0.179 | 0.06  | 0.015297503 |
| CD3D     | 7.32E-07 | -0.292590285 | 0.597 | 0.749 | 0.015969612 |
| SC5D     | 7.33E-07 | 0.446523837  | 0.176 | 0.06  | 0.015988497 |
| AREG     | 8.72E-07 | 0.652270193  | 0.425 | 0.264 | 0.019021409 |
| NAMPT    | 8.80E-07 | 0.453832901  | 0.249 | 0.114 | 0.019196602 |
| FAM49B   | 9.43E-07 | -0.396824488 | 0.22  | 0.405 | 0.020566501 |
| 1-Sep    | 9.76E-07 | -0.405511339 | 0.3   | 0.481 | 0.021286509 |
| HMGB1    | 1.06E-06 | -0.30702836  | 0.656 | 0.79  | 0.023081957 |
| CISH     | 1.11E-06 | -0.375879526 | 0.015 | 0.114 | 0.024259642 |
| WAS      | 1.19E-06 | -0.458641508 | 0.201 | 0.36  | 0.025998862 |
| DDX17    | 1.24E-06 | -0.393056249 | 0.238 | 0.412 | 0.02712774  |
| MYADM    | 1.36E-06 | 0.55283504   | 0.388 | 0.251 | 0.029615685 |
| RGS14    | 1.45E-06 | -0.410005282 | 0.077 | 0.215 | 0.031687554 |
| TNFRSF1A | 1.52E-06 | -0.378760395 | 0.018 | 0.121 | 0.03317113  |
| UPF3A    | 1.58E-06 | -0.395955582 | 0.037 | 0.15  | 0.034483436 |
| DUSP1    | 1.59E-06 | -0.288605299 | 0.908 | 0.917 | 0.034579743 |
| GPBP1    | 1.63E-06 | 0.508077262  | 0.451 | 0.306 | 0.035564928 |
| BAG3     | 1.70E-06 | 0.423357035  | 0.117 | 0.029 | 0.036968557 |
| IFITM3   | 1.73E-06 | 0.399158494  | 0.136 | 0.04  | 0.037769967 |
| OAZ1     | 1.74E-06 | 0.30166557   | 0.839 | 0.792 | 0.037946705 |
| RANGAP1  | 1.80E-06 | 0.406745815  | 0.132 | 0.038 | 0.039317421 |
| PTGDR    | 1.84E-06 | -0.422081006 | 0.04  | 0.154 | 0.040159684 |
| PCBP1    | 1.94E-06 | -0.317159927 | 0.454 | 0.6   | 0.042389465 |
| KIAA1551 | 1.96E-06 | -0.439747044 | 0.278 | 0.441 | 0.042718883 |
| SIRPG    | 1.98E-06 | -0.451741155 | 0.066 | 0.192 | 0.043144531 |
| REL      | 2.15E-06 | 0.421278374  | 0.388 | 0.233 | 0.04684517  |

List of differentially expressed genes of GNLY NK in reperfusion stage (PR versus EP)

| gene   | p val    | avg logFC    | pct.1 | pct.2 | p val adj |
|--------|----------|--------------|-------|-------|-----------|
| LAIR2  | 2.28E-25 | 1.216642086  | 0.456 | 0.105 | 4.97E-21  |
| GBP2   | 1.37E-23 | 0.911236414  | 0.569 | 0.19  | 2.98E-19  |
| SDCBP  | 1.20E-21 | 0.938274798  | 0.638 | 0.281 | 2.63E-17  |
| CORO1A | 1.16E-20 | -0.768494009 | 0.575 | 0.842 | 2.54E-16  |
| HLA-B  | 2.12E-20 | 0.308211162  | 1     | 1     | 4.62E-16  |
| NFKBIA | 3.40E-19 | 0.751977156  | 0.912 | 0.654 | 7.41E-15  |
| SRGN   | 3.55E-18 | 0.487186714  | 0.988 | 0.978 | 7.75E-14  |
| RELB   | 4.92E-18 | 0.827579867  | 0.356 | 0.087 | 1.07E-13  |
| DEFA3  | 7.63E-18 | -1.122473163 | 0.031 | 0.393 | 1.66E-13  |
| HBB    | 1.07E-17 | -1.350903235 | 0.081 | 0.451 | 2.34E-13  |
| CST7   | 2.12E-17 | 0.472482768  | 1     | 0.982 | 4.63E-13  |

|          |          |              |       |       |             |
|----------|----------|--------------|-------|-------|-------------|
| RPS29    | 3.02E-17 | 0.453179536  | 0.975 | 0.923 | 6.58E-13    |
| CCL4     | 6.44E-17 | 0.880235251  | 0.944 | 0.907 | 1.40E-12    |
| PTPRCAP  | 7.19E-16 | -0.546631697 | 0.744 | 0.915 | 1.57E-11    |
| FCER1G   | 1.26E-15 | 1.029947177  | 0.312 | 0.073 | 2.74E-11    |
| ACTB     | 1.76E-15 | -0.361531353 | 1     | 1     | 3.84E-11    |
| NFKB2    | 2.35E-15 | 0.629945235  | 0.262 | 0.049 | 5.13E-11    |
| CD3E     | 3.62E-15 | -0.561809148 | 0.481 | 0.834 | 7.89E-11    |
| GZMB     | 8.02E-15 | 0.527474122  | 0.975 | 0.937 | 1.75E-10    |
| MT-ATP6  | 1.06E-14 | -0.309686905 | 0.988 | 0.99  | 2.31E-10    |
| SLC9A3R1 | 3.25E-14 | -0.677910947 | 0.35  | 0.66  | 7.08E-10    |
| HIF1A    | 3.57E-13 | 0.764317701  | 0.419 | 0.16  | 7.79E-09    |
| TNFAIP3  | 5.97E-13 | 0.657958335  | 0.712 | 0.445 | 1.30E-08    |
| ZBTB16   | 9.67E-13 | 0.566612976  | 0.181 | 0.026 | 2.11E-08    |
| HSPB1    | 9.97E-13 | 1.072768514  | 0.481 | 0.223 | 2.17E-08    |
| GZMA     | 1.69E-12 | -0.433396423 | 0.775 | 0.947 | 3.69E-08    |
| LCK      | 6.61E-12 | -0.609976038 | 0.344 | 0.638 | 1.44E-07    |
| BATF     | 7.92E-12 | 0.752323798  | 0.531 | 0.294 | 1.73E-07    |
| HSPD1    | 8.89E-12 | 1.495735643  | 0.525 | 0.296 | 1.94E-07    |
| GNLY     | 1.15E-11 | -0.309055698 | 0.919 | 1     | 2.50E-07    |
| SYTL3    | 1.20E-11 | 0.53601358   | 0.738 | 0.518 | 2.61E-07    |
| GZMH     | 2.29E-11 | -0.423485316 | 0.75  | 0.925 | 4.99E-07    |
| DUSP1    | 2.48E-11 | -0.562917627 | 0.744 | 0.885 | 5.41E-07    |
| PRDM1    | 2.99E-11 | 0.593417237  | 0.688 | 0.451 | 6.52E-07    |
| PTGDS    | 3.32E-11 | 1.091454054  | 0.244 | 0.061 | 7.25E-07    |
| PFN1     | 4.25E-11 | -0.299837749 | 0.988 | 0.996 | 9.26E-07    |
| BCL3     | 4.49E-11 | 0.482723033  | 0.156 | 0.022 | 9.79E-07    |
| H3F3B    | 5.32E-11 | 0.30785705   | 0.981 | 0.97  | 1.16E-06    |
| ISG20    | 5.86E-11 | 0.504133254  | 0.794 | 0.593 | 1.28E-06    |
| RGS19    | 8.09E-11 | -0.786967768 | 0.05  | 0.294 | 1.76E-06    |
| SH3BGR13 | 2.53E-10 | -0.34780161  | 0.906 | 0.974 | 5.52E-06    |
| CADM1    | 6.95E-10 | 0.551813449  | 0.2   | 0.047 | 1.52E-05    |
| MAP3K8   | 7.01E-10 | 0.672169179  | 0.6   | 0.393 | 1.53E-05    |
| GSTP1    | 7.16E-10 | -0.484474395 | 0.519 | 0.757 | 1.56E-05    |
| ACTG1    | 8.20E-10 | -0.351265211 | 0.962 | 0.974 | 1.79E-05    |
| TBC1D10C | 8.45E-10 | -0.61510488  | 0.175 | 0.449 | 1.84E-05    |
| S100A4   | 9.11E-10 | -0.369258322 | 0.881 | 0.974 | 1.99E-05    |
| IRF8     | 1.15E-09 | 0.52650287   | 0.206 | 0.051 | 2.52E-05    |
| EIF1     | 2.29E-09 | 0.265043381  | 0.988 | 0.984 | 4.99E-05    |
| HPGD     | 3.13E-09 | 0.577022673  | 0.188 | 0.045 | 6.84E-05    |
| LDHA     | 4.07E-09 | 0.534125318  | 0.656 | 0.457 | 8.88E-05    |
| STOM     | 4.63E-09 | 0.57469389   | 0.538 | 0.334 | 0.000100953 |
| SH3BP1   | 4.85E-09 | -0.627827544 | 0.088 | 0.324 | 0.000105757 |
| SH2D2A   | 4.91E-09 | 0.636881947  | 0.531 | 0.33  | 0.000107076 |
| LAT      | 5.88E-09 | -0.601871502 | 0.169 | 0.423 | 0.000128135 |
| IGLV2-14 | 6.99E-09 | -0.679230387 | 0.1   | 0.338 | 0.000152504 |
| TRBC1    | 8.47E-09 | -0.408642063 | 0.65  | 0.86  | 0.000184675 |
| KIR2DL3  | 8.52E-09 | 0.547722771  | 0.394 | 0.178 | 0.000185726 |
| SQSTM1   | 1.25E-08 | 0.4793744    | 0.762 | 0.597 | 0.000273348 |
| CCND3    | 2.08E-08 | -0.412493324 | 0.488 | 0.743 | 0.000453176 |
| GADD45B  | 2.21E-08 | 0.485312103  | 0.856 | 0.757 | 0.000481314 |
| PNRC1    | 3.26E-08 | 0.421505556  | 0.831 | 0.686 | 0.000710734 |
| TRAF3IP3 | 4.98E-08 | -0.513972305 | 0.212 | 0.453 | 0.001086604 |
| SLFN5    | 5.12E-08 | -0.617882803 | 0.056 | 0.257 | 0.00111729  |
| CNN2     | 5.57E-08 | -0.573756108 | 0.131 | 0.354 | 0.001214115 |
| CCL3     | 6.27E-08 | 0.683328265  | 0.712 | 0.508 | 0.001366416 |
| EGR2     | 6.96E-08 | 0.457342875  | 0.119 | 0.02  | 0.001518636 |
| ICAM1    | 8.11E-08 | 0.552684788  | 0.262 | 0.101 | 0.001767707 |
| BIN2     | 8.61E-08 | -0.484278021 | 0.362 | 0.593 | 0.001877656 |
| CD63     | 8.76E-08 | -0.493066948 | 0.369 | 0.595 | 0.001911134 |
| RASSF1   | 9.73E-08 | -0.536063078 | 0.188 | 0.421 | 0.00212089  |
| SMAP2    | 1.11E-07 | 0.500550656  | 0.362 | 0.174 | 0.002417465 |
| CSK      | 1.31E-07 | -0.591163073 | 0.15  | 0.364 | 0.002855067 |
| RAC2     | 1.75E-07 | -0.345808816 | 0.744 | 0.866 | 0.003818483 |
| ACAP1    | 1.95E-07 | -0.590124587 | 0.194 | 0.409 | 0.004243444 |
| MYL12A   | 2.00E-07 | -0.310670381 | 0.869 | 0.941 | 0.004356239 |
| TSC22D4  | 2.04E-07 | -0.539610157 | 0.119 | 0.328 | 0.004440964 |
| FOSB     | 2.24E-07 | -0.647186457 | 0.269 | 0.484 | 0.004876772 |
| CCL4L2   | 2.62E-07 | 0.966338275  | 0.775 | 0.694 | 0.005705627 |
| ACTR3    | 2.66E-07 | -0.465073301 | 0.456 | 0.662 | 0.005799922 |
| IGLV2-23 | 2.85E-07 | -0.63578709  | 0.031 | 0.206 | 0.006224854 |

|          |          |              |       |       |             |
|----------|----------|--------------|-------|-------|-------------|
| LSP1     | 3.00E-07 | -0.379319482 | 0.562 | 0.771 | 0.006550335 |
| CKLF     | 3.40E-07 | -0.549060837 | 0.15  | 0.352 | 0.007405077 |
| S100A8   | 3.92E-07 | -0.590664203 | 0.225 | 0.447 | 0.008544464 |
| KIR3DL2  | 5.74E-07 | 0.615341782  | 0.294 | 0.134 | 0.012514215 |
| SNAP23   | 5.97E-07 | 0.44132595   | 0.3   | 0.13  | 0.013017106 |
| SBNO2    | 7.44E-07 | 0.358490839  | 0.112 | 0.022 | 0.016227326 |
| SLA2     | 8.72E-07 | 0.47958875   | 0.369 | 0.192 | 0.019025294 |
| TTC38    | 8.78E-07 | -0.508451272 | 0.231 | 0.443 | 0.019148813 |
| 1-Sep    | 9.26E-07 | -0.467143841 | 0.194 | 0.403 | 0.020197055 |
| ANKRD28  | 1.02E-06 | 0.4884527    | 0.362 | 0.184 | 0.022313333 |
| BIN1     | 1.04E-06 | -0.480202656 | 0.156 | 0.354 | 0.022658652 |
| FKBP4    | 1.14E-06 | 0.737022474  | 0.206 | 0.077 | 0.024923923 |
| AGTRAP   | 1.27E-06 | -0.546227945 | 0.131 | 0.318 | 0.027643746 |
| CSNK1D   | 1.32E-06 | 0.464733012  | 0.356 | 0.186 | 0.028841675 |
| PIM1     | 1.34E-06 | 0.496634991  | 0.5   | 0.314 | 0.029229165 |
| GBP4     | 1.47E-06 | 0.422481033  | 0.288 | 0.126 | 0.032108168 |
| HCST     | 1.48E-06 | -0.327835084 | 0.844 | 0.903 | 0.032190838 |
| KIR2DL4  | 1.51E-06 | 0.415650131  | 0.131 | 0.032 | 0.032902659 |
| C9orf142 | 1.52E-06 | -0.465922358 | 0.45  | 0.625 | 0.03311928  |
| NDUFB7   | 1.69E-06 | -0.452264018 | 0.169 | 0.389 | 0.036883362 |
| HSPH1    | 1.69E-06 | 1.283876553  | 0.381 | 0.235 | 0.036901903 |
| TBXAS1   | 1.93E-06 | 0.462444486  | 0.138 | 0.036 | 0.042125471 |
| NFKB1    | 1.97E-06 | 0.38178623   | 0.188 | 0.061 | 0.042925267 |

List of differentially expressed genes of CCL20 CD8 MAIT in reperfusion stage (PR versus EP)

| gene     | p_val    | avg_logFC    | pct.1 | pct.2 | p_val adj |
|----------|----------|--------------|-------|-------|-----------|
| RELB     | 3.54E-45 | 1.352257968  | 0.683 | 0.114 | 7.73E-41  |
| NFKB1    | 8.62E-42 | 1.315078632  | 0.658 | 0.112 | 1.88E-37  |
| BATF     | 1.57E-40 | 1.54123061   | 0.792 | 0.261 | 3.41E-36  |
| NFKB2    | 1.04E-35 | 1.157677184  | 0.617 | 0.118 | 2.26E-31  |
| TNFRSF18 | 1.29E-34 | 0.881495513  | 0.383 | 0.021 | 2.81E-30  |
| CD7      | 1.38E-33 | 0.899609782  | 0.983 | 0.819 | 3.01E-29  |
| CREM     | 6.00E-32 | 1.166597527  | 0.817 | 0.337 | 1.31E-27  |
| HSPD1    | 1.48E-30 | 1.804722976  | 0.767 | 0.309 | 3.22E-26  |
| HLA-B    | 2.57E-29 | 0.510095423  | 1     | 0.996 | 5.60E-25  |
| SLC7A5   | 6.48E-29 | 0.995233998  | 0.758 | 0.28  | 1.41E-24  |
| HSP90AA1 | 8.75E-29 | 1.542809929  | 0.95  | 0.853 | 1.91E-24  |
| NINJ1    | 1.34E-28 | 1.095716948  | 0.567 | 0.128 | 2.92E-24  |
| SERPINB9 | 1.36E-28 | 1.08911042   | 0.658 | 0.204 | 2.97E-24  |
| HLA-A    | 5.09E-28 | 0.539012923  | 1     | 0.992 | 1.11E-23  |
| SRGN     | 1.34E-27 | 0.795841642  | 0.975 | 0.96  | 2.93E-23  |
| TXNIP    | 3.47E-27 | -1.083605532 | 0.408 | 0.882 | 7.56E-23  |
| MYL12A   | 2.39E-25 | -0.7446495   | 0.833 | 0.958 | 5.22E-21  |
| FEZ1     | 3.36E-25 | 1.129316497  | 0.567 | 0.156 | 7.33E-21  |
| FAM177A1 | 3.65E-24 | 1.21891897   | 0.7   | 0.312 | 7.95E-20  |
| CORO1A   | 1.29E-23 | -0.841944148 | 0.633 | 0.907 | 2.82E-19  |
| SYAP1    | 5.99E-23 | 1.04109338   | 0.592 | 0.179 | 1.31E-18  |
| FURIN    | 6.60E-23 | 0.802690696  | 0.333 | 0.038 | 1.44E-18  |
| PBX4     | 3.30E-22 | 1.035846314  | 0.642 | 0.253 | 7.19E-18  |
| SYTL3    | 2.88E-20 | 0.838504044  | 0.842 | 0.497 | 6.29E-16  |
| GNG2     | 3.81E-20 | 0.821553517  | 0.875 | 0.6   | 8.31E-16  |
| TNFRSF4  | 6.78E-20 | 0.665278206  | 0.2   | 0.006 | 1.48E-15  |
| BACH2    | 8.14E-20 | 0.557959357  | 0.25  | 0.019 | 1.78E-15  |
| CCND3    | 8.19E-20 | -0.973636759 | 0.242 | 0.697 | 1.79E-15  |
| HSPE1    | 9.86E-20 | 1.409826444  | 0.775 | 0.501 | 2.15E-15  |
| S100A4   | 2.56E-19 | -0.508035538 | 0.933 | 0.994 | 5.57E-15  |
| FTH1     | 2.80E-19 | 1.098986069  | 0.958 | 0.973 | 6.10E-15  |
| BIRC3    | 8.37E-19 | 0.913736253  | 0.583 | 0.202 | 1.82E-14  |
| LMNA     | 1.08E-18 | 0.930577651  | 0.333 | 0.057 | 2.35E-14  |
| HSP90AB1 | 3.50E-18 | 0.836527447  | 0.942 | 0.8   | 7.64E-14  |
| PFKFB3   | 5.86E-18 | 0.805031109  | 0.533 | 0.179 | 1.28E-13  |
| TNFRSF1B | 1.28E-17 | 0.803327491  | 0.608 | 0.236 | 2.80E-13  |
| MIR155HG | 3.67E-17 | 0.886049418  | 0.283 | 0.04  | 8.00E-13  |
| DUSP1    | 4.35E-17 | -0.511488575 | 0.933 | 0.981 | 9.48E-13  |
| ACTB     | 7.19E-17 | -0.419903782 | 1     | 1     | 1.57E-12  |
| TRAF3IP3 | 2.41E-16 | -0.931514133 | 0.1   | 0.52  | 5.26E-12  |
| TNFRSF9  | 3.20E-16 | 0.581202124  | 0.192 | 0.013 | 6.99E-12  |



|          |          |              |       |       |          |
|----------|----------|--------------|-------|-------|----------|
| SNX9     | 3.59E-16 | 0.809629105  | 0.442 | 0.131 | 7.84E-12 |
| EVL      | 4.78E-16 | -0.72908588  | 0.342 | 0.72  | 1.04E-11 |
| CCL20    | 5.10E-16 | 1.414884803  | 0.567 | 0.215 | 1.11E-11 |
| PIM2     | 7.97E-16 | 0.884610699  | 0.608 | 0.28  | 1.74E-11 |
| DENND2D  | 8.33E-16 | -0.946562747 | 0.092 | 0.501 | 1.82E-11 |
| STAT4    | 9.00E-16 | 0.743231593  | 0.733 | 0.427 | 1.96E-11 |
| PDE4A    | 1.04E-15 | 0.592589147  | 0.217 | 0.021 | 2.27E-11 |
| EML4     | 1.44E-15 | 0.709137597  | 0.775 | 0.48  | 3.13E-11 |
| KLRG1    | 1.63E-15 | -0.724824907 | 0.55  | 0.794 | 3.56E-11 |
| IRF8     | 2.58E-15 | 0.672838801  | 0.35  | 0.08  | 5.62E-11 |
| FOXO1    | 3.18E-15 | 0.700267721  | 0.342 | 0.078 | 6.94E-11 |
| LCK      | 3.65E-15 | -0.772820484 | 0.325 | 0.699 | 7.95E-11 |
| ELOVL5   | 4.12E-15 | 0.774249249  | 0.692 | 0.387 | 8.98E-11 |
| PTPN6    | 9.01E-15 | -0.859119267 | 0.083 | 0.491 | 1.96E-10 |
| PTPRCAP  | 1.06E-14 | -0.541796533 | 0.808 | 0.931 | 2.32E-10 |
| DENND4A  | 2.57E-14 | 0.701287912  | 0.383 | 0.103 | 5.60E-10 |
| DEFA3    | 2.78E-14 | -0.983500795 | 0.042 | 0.413 | 6.05E-10 |
| SLC9A3R1 | 3.70E-14 | -0.79572804  | 0.15  | 0.543 | 8.06E-10 |
| GPR171   | 4.21E-14 | 0.838586708  | 0.658 | 0.352 | 9.18E-10 |
| REL      | 5.54E-14 | 0.897758006  | 0.742 | 0.448 | 1.21E-09 |
| SH3BGRL3 | 6.85E-14 | -0.528049942 | 0.85  | 0.958 | 1.49E-09 |
| KDM6B    | 8.21E-14 | 0.669564374  | 0.508 | 0.192 | 1.79E-09 |
| TRAF4    | 8.89E-14 | 0.44022101   | 0.192 | 0.019 | 1.94E-09 |
| SEC14L1  | 1.25E-13 | 0.766467847  | 0.417 | 0.135 | 2.73E-09 |
| GZMA     | 2.05E-13 | -0.537823481 | 0.783 | 0.916 | 4.47E-09 |
| IFNG     | 2.36E-13 | 1.179495813  | 0.633 | 0.305 | 5.15E-09 |
| LITAF    | 2.58E-13 | 0.717528256  | 0.75  | 0.459 | 5.63E-09 |
| SOCS3    | 3.09E-13 | 0.689868353  | 0.508 | 0.196 | 6.75E-09 |
| RPS29    | 3.32E-13 | 0.402622065  | 0.975 | 0.975 | 7.25E-09 |
| SH2D2A   | 3.90E-13 | 0.774217344  | 0.675 | 0.387 | 8.51E-09 |
| OTULIN   | 5.24E-13 | 0.51013363   | 0.258 | 0.048 | 1.14E-08 |
| LYST     | 7.38E-13 | 0.666387178  | 0.467 | 0.175 | 1.61E-08 |
| GPBP1    | 8.19E-13 | 0.637958651  | 0.775 | 0.472 | 1.79E-08 |
| H3F3B    | 1.14E-12 | 0.453790782  | 1     | 0.987 | 2.48E-08 |
| HIF1A    | 1.47E-12 | 0.834060549  | 0.525 | 0.236 | 3.20E-08 |
| BCL3     | 1.75E-12 | 0.568348613  | 0.275 | 0.059 | 3.82E-08 |
| CKLF     | 1.79E-12 | -0.65119725  | 0.242 | 0.611 | 3.91E-08 |
| JUN      | 2.04E-12 | -0.527876296 | 0.767 | 0.968 | 4.46E-08 |
| STAT3    | 2.34E-12 | 0.6997497    | 0.567 | 0.282 | 5.10E-08 |
| TRABD2A  | 2.69E-12 | 0.562911552  | 0.192 | 0.025 | 5.88E-08 |
| PIM3     | 3.51E-12 | 0.646216088  | 0.35  | 0.103 | 7.66E-08 |
| TBC1D10C | 3.96E-12 | -0.744184539 | 0.142 | 0.499 | 8.64E-08 |
| TANK     | 4.25E-12 | 0.727724289  | 0.55  | 0.259 | 9.27E-08 |
| GZMB     | 4.66E-12 | 0.680360193  | 0.217 | 0.036 | 1.02E-07 |
| BHLHE40  | 5.72E-12 | 0.604518259  | 0.617 | 0.299 | 1.25E-07 |
| HOPX     | 6.23E-12 | -0.675294644 | 0.258 | 0.589 | 1.36E-07 |
| MAP3K8   | 6.31E-12 | 0.636520593  | 0.683 | 0.364 | 1.38E-07 |
| HSP90B1  | 6.73E-12 | 0.713437731  | 0.775 | 0.537 | 1.47E-07 |
| GIMAP4   | 9.03E-12 | -0.701238936 | 0.275 | 0.634 | 1.97E-07 |
| HSPA5    | 1.10E-11 | 0.584716842  | 0.758 | 0.493 | 2.39E-07 |
| STARD7   | 1.64E-11 | 0.710110634  | 0.467 | 0.2   | 3.58E-07 |
| MT2A     | 1.96E-11 | 0.96997981   | 0.95  | 0.796 | 4.26E-07 |
| HSPH1    | 2.22E-11 | 0.980126647  | 0.45  | 0.194 | 4.84E-07 |
| TRAF1    | 3.00E-11 | 0.687286741  | 0.467 | 0.189 | 6.53E-07 |
| ODC1     | 3.63E-11 | 0.609630987  | 0.367 | 0.118 | 7.92E-07 |
| PPP1R18  | 3.89E-11 | -0.684723308 | 0.2   | 0.549 | 8.48E-07 |
| RORA     | 4.02E-11 | 0.598757048  | 0.8   | 0.556 | 8.76E-07 |
| CD44     | 4.41E-11 | 0.621069326  | 0.717 | 0.478 | 9.62E-07 |
| SARAF    | 4.51E-11 | 0.40119833   | 0.95  | 0.928 | 9.84E-07 |
| TSC22D4  | 4.53E-11 | -0.693908175 | 0.067 | 0.389 | 9.87E-07 |
| TRAF3    | 5.58E-11 | 0.437196098  | 0.167 | 0.021 | 1.22E-06 |
| HBB      | 1.30E-10 | -0.893636452 | 0.092 | 0.406 | 2.84E-06 |
| BCL2A1   | 1.38E-10 | 0.780146024  | 0.542 | 0.269 | 3.01E-06 |
| ATP1B3   | 1.45E-10 | 0.644022602  | 0.325 | 0.103 | 3.16E-06 |
| ACAP1    | 1.67E-10 | -0.641643162 | 0.325 | 0.642 | 3.63E-06 |
| BCL2     | 1.80E-10 | -0.779796766 | 0.058 | 0.352 | 3.93E-06 |
| GIMAP1   | 1.88E-10 | -0.726886498 | 0.142 | 0.453 | 4.10E-06 |
| EZR      | 2.16E-10 | 0.649910293  | 0.675 | 0.408 | 4.71E-06 |
| GIMAP7   | 3.04E-10 | -0.681975079 | 0.183 | 0.512 | 6.62E-06 |
| CD3E     | 3.37E-10 | -0.352401776 | 0.908 | 0.973 | 7.36E-06 |

|            |          |              |       |       |             |
|------------|----------|--------------|-------|-------|-------------|
| PIM1       | 3.66E-10 | 0.626229412  | 0.7   | 0.474 | 7.97E-06    |
| ZHX2       | 3.86E-10 | 0.56290588   | 0.275 | 0.074 | 8.43E-06    |
| AC006129.2 | 3.96E-10 | -0.68955794  | 0.133 | 0.448 | 8.64E-06    |
| CD52       | 4.29E-10 | -0.52561808  | 0.708 | 0.863 | 9.35E-06    |
| GPR183     | 4.29E-10 | 0.634236961  | 0.358 | 0.126 | 9.36E-06    |
| HSPA1A     | 4.41E-10 | 1.559239908  | 0.567 | 0.318 | 9.62E-06    |
| THBS1      | 4.58E-10 | 0.371661006  | 0.133 | 0.013 | 9.98E-06    |
| SMAP2      | 4.83E-10 | 0.605083361  | 0.567 | 0.312 | 1.05E-05    |
| TNFAIP3    | 4.91E-10 | 0.515193877  | 0.883 | 0.737 | 1.07E-05    |
| ARHGAP31   | 4.96E-10 | 0.348134471  | 0.158 | 0.021 | 1.08E-05    |
| PPP1CB     | 5.98E-10 | 0.593609691  | 0.508 | 0.244 | 1.30E-05    |
| GTF3C1     | 6.21E-10 | 0.625696566  | 0.433 | 0.185 | 1.35E-05    |
| SATB1      | 8.81E-10 | 0.666998032  | 0.725 | 0.516 | 1.92E-05    |
| ATF3       | 8.94E-10 | 0.758789427  | 0.45  | 0.187 | 1.95E-05    |
| VAV1       | 1.10E-09 | 0.494723063  | 0.325 | 0.105 | 2.41E-05    |
| MTHFD2     | 1.20E-09 | 0.562429979  | 0.392 | 0.154 | 2.63E-05    |
| RBM17      | 1.30E-09 | 0.544326558  | 0.458 | 0.206 | 2.84E-05    |
| PGK1       | 1.39E-09 | 0.663237662  | 0.667 | 0.448 | 3.03E-05    |
| RBBP8      | 1.62E-09 | 0.352229311  | 0.133 | 0.015 | 3.54E-05    |
| RUNX3      | 1.66E-09 | 0.561600165  | 0.567 | 0.301 | 3.62E-05    |
| SDCBP      | 1.82E-09 | 0.567434603  | 0.583 | 0.309 | 3.97E-05    |
| TIFA       | 2.19E-09 | 0.70125796   | 0.35  | 0.133 | 4.78E-05    |
| SH3BP1     | 2.39E-09 | -0.625178466 | 0.058 | 0.331 | 5.22E-05    |
| GPCPD1     | 2.43E-09 | 0.596342882  | 0.375 | 0.149 | 5.30E-05    |
| TNIP1      | 3.20E-09 | 0.535010885  | 0.492 | 0.244 | 6.97E-05    |
| METRNL     | 3.60E-09 | 0.322553978  | 0.117 | 0.011 | 7.85E-05    |
| PHLDB2     | 4.11E-09 | 0.309287398  | 0.108 | 0.008 | 8.97E-05    |
| HCST       | 6.31E-09 | -0.378488256 | 0.858 | 0.947 | 0.00013767  |
| IL2RA      | 6.99E-09 | 0.317423482  | 0.133 | 0.017 | 0.000152341 |
| STARD10    | 7.13E-09 | 0.336136536  | 0.133 | 0.017 | 0.000155537 |
| PFN1       | 7.30E-09 | -0.309596988 | 0.975 | 0.992 | 0.000159306 |
| CPD        | 7.32E-09 | 0.51578242   | 0.325 | 0.116 | 0.000159675 |
| DDX24      | 7.81E-09 | 0.587477516  | 0.683 | 0.465 | 0.000170353 |
| HIVEP2     | 8.16E-09 | 0.548217098  | 0.283 | 0.093 | 0.000178034 |
| DENND3     | 8.81E-09 | 0.442313727  | 0.175 | 0.034 | 0.000192135 |
| STAM       | 1.01E-08 | 0.38785295   | 0.183 | 0.038 | 0.000219906 |
| SPPL2A     | 1.04E-08 | 0.49529852   | 0.375 | 0.145 | 0.000227545 |
| EIF5A      | 1.20E-08 | 0.533562532  | 0.642 | 0.408 | 0.00026151  |
| C19orf60   | 1.22E-08 | -0.634124626 | 0.133 | 0.411 | 0.000265986 |
| PRMT2      | 1.22E-08 | -0.539461556 | 0.217 | 0.516 | 0.000267042 |
| NAMPT      | 1.27E-08 | 0.743808511  | 0.417 | 0.189 | 0.000276741 |
| HLA-DQB1   | 1.48E-08 | 0.590235691  | 0.483 | 0.244 | 0.000323554 |
| IL7R       | 1.53E-08 | 0.408366659  | 1     | 0.979 | 0.000333853 |
| IL4R       | 1.90E-08 | 0.47377994   | 0.208 | 0.051 | 0.000413292 |
| IL21R      | 2.13E-08 | 0.456531613  | 0.25  | 0.074 | 0.000465329 |
| CAST       | 2.56E-08 | 0.594696674  | 0.617 | 0.385 | 0.00055742  |
| PSTPIP2    | 2.65E-08 | 0.447007082  | 0.225 | 0.061 | 0.000578393 |
| RNF115     | 2.68E-08 | 0.596277431  | 0.458 | 0.229 | 0.000583633 |
| ELL2       | 2.81E-08 | 0.444103569  | 0.292 | 0.099 | 0.000613473 |
| ISG20      | 2.83E-08 | 0.522290456  | 0.767 | 0.594 | 0.000618216 |
| PDE4D      | 2.88E-08 | 0.57511942   | 0.425 | 0.198 | 0.000627471 |
| BAZ1A      | 3.12E-08 | 0.521052013  | 0.533 | 0.297 | 0.000681418 |
| SURF4      | 3.38E-08 | 0.507810504  | 0.517 | 0.265 | 0.0007363   |
| PHLDA1     | 3.59E-08 | 0.616441416  | 0.417 | 0.181 | 0.000782549 |
| CHD9       | 3.94E-08 | -0.631087427 | 0.042 | 0.282 | 0.000859517 |
| AC092580.4 | 4.14E-08 | 0.617316842  | 0.667 | 0.503 | 0.000903809 |
| ANKRD28    | 4.21E-08 | 0.589542127  | 0.408 | 0.187 | 0.000918021 |
| PYHIN1     | 4.48E-08 | -0.59286637  | 0.15  | 0.419 | 0.000977426 |
| AREG       | 4.61E-08 | 0.761832373  | 0.475 | 0.244 | 0.001006119 |
| KIAA1551   | 5.45E-08 | -0.615415027 | 0.2   | 0.461 | 0.001188974 |
| IL16       | 6.20E-08 | -0.534664878 | 0.125 | 0.387 | 0.001353015 |
| POLR3E     | 6.58E-08 | 0.417801943  | 0.192 | 0.046 | 0.001435208 |
| SAMSN1     | 7.22E-08 | 0.512962506  | 0.4   | 0.177 | 0.001574991 |
| SCML4      | 9.44E-08 | -0.533117851 | 0.25  | 0.509 | 0.002058955 |
| LCP2       | 9.94E-08 | -0.517700911 | 0.317 | 0.589 | 0.002168402 |
| CD244      | 1.01E-07 | -0.520432501 | 0.017 | 0.229 | 0.002198965 |
| BIN2       | 1.07E-07 | -0.559742086 | 0.267 | 0.514 | 0.002337653 |
| PPP1R16B   | 1.08E-07 | 0.456784496  | 0.258 | 0.086 | 0.00235523  |
| SYTL2      | 1.38E-07 | 0.542864967  | 0.583 | 0.354 | 0.0030107   |
| TAGAP      | 1.41E-07 | -0.540060056 | 0.575 | 0.752 | 0.003083212 |

|          |          |              |       |       |             |
|----------|----------|--------------|-------|-------|-------------|
| TMC8     | 1.48E-07 | -0.578038079 | 0.15  | 0.389 | 0.003227268 |
| TNIP2    | 1.54E-07 | 0.423024368  | 0.217 | 0.063 | 0.003364739 |
| ZBTB38   | 1.76E-07 | -0.597602317 | 0.183 | 0.427 | 0.003830103 |
| JAML     | 1.92E-07 | -0.529809693 | 0.108 | 0.362 | 0.004189846 |
| HSH2D    | 2.30E-07 | 0.47299675   | 0.233 | 0.074 | 0.005015926 |
| CYB5A    | 2.52E-07 | 0.509546202  | 0.3   | 0.118 | 0.005490907 |
| SYNGR2   | 2.75E-07 | 0.475507182  | 0.383 | 0.179 | 0.006000108 |
| STX11    | 2.77E-07 | 0.423677312  | 0.242 | 0.078 | 0.006041806 |
| EMD      | 2.82E-07 | 0.469019762  | 0.5   | 0.282 | 0.00614267  |
| SH2D3A   | 2.84E-07 | 0.376606339  | 0.175 | 0.042 | 0.006186822 |
| FLT3LG   | 2.91E-07 | -0.562482799 | 0.1   | 0.343 | 0.006349644 |
| MEAF6    | 3.33E-07 | -0.538920881 | 0.142 | 0.383 | 0.007270278 |
| PABPC1   | 3.56E-07 | 0.36758852   | 0.925 | 0.956 | 0.007763923 |
| DDX21    | 3.71E-07 | 0.589641897  | 0.55  | 0.343 | 0.008096906 |
| POR      | 3.80E-07 | 0.37431531   | 0.192 | 0.053 | 0.008285203 |
| CDC42SE2 | 3.83E-07 | 0.484002949  | 0.692 | 0.459 | 0.008362595 |
| IGLV2-14 | 3.87E-07 | -0.569043992 | 0.05  | 0.267 | 0.008446142 |
| ITGB2    | 4.06E-07 | -0.508685717 | 0.433 | 0.621 | 0.008843453 |
| THEMIS   | 4.18E-07 | -0.539963075 | 0.133 | 0.385 | 0.009109102 |
| ZC3H12A  | 4.19E-07 | 0.394422812  | 0.658 | 0.404 | 0.009132563 |
| FYN      | 4.29E-07 | 0.398739566  | 0.783 | 0.688 | 0.009350543 |
| CD74     | 4.72E-07 | 0.500074295  | 0.808 | 0.672 | 0.010292283 |
| CAMK4    | 5.10E-07 | 0.461060005  | 0.642 | 0.413 | 0.01112585  |
| HDAC7    | 5.84E-07 | -0.494385296 | 0.008 | 0.194 | 0.012746182 |
| TMIGD2   | 6.18E-07 | -0.540550787 | 0.183 | 0.436 | 0.013483624 |
| SYNJ2    | 7.02E-07 | 0.446152239  | 0.175 | 0.046 | 0.015303564 |
| PDLIM2   | 7.24E-07 | -0.566477593 | 0.1   | 0.32  | 0.015784296 |
| JUND     | 7.60E-07 | 0.478500492  | 0.558 | 0.339 | 0.016567566 |
| RANGAP1  | 7.82E-07 | 0.430359105  | 0.175 | 0.046 | 0.017063388 |
| ARRB2    | 8.19E-07 | -0.523907169 | 0.125 | 0.352 | 0.017852652 |
| LGALS1   | 8.68E-07 | 0.661179906  | 0.35  | 0.16  | 0.01893153  |
| ECE1     | 8.71E-07 | 0.384709287  | 0.158 | 0.038 | 0.019002243 |
| DUSP2    | 8.77E-07 | -0.342368019 | 0.933 | 0.962 | 0.019123758 |
| CNOT6L   | 9.55E-07 | 0.490297327  | 0.5   | 0.291 | 0.020819116 |
| CDKN1B   | 1.06E-06 | -0.542250131 | 0.183 | 0.415 | 0.023148175 |
| DHRS3    | 1.08E-06 | 0.395833726  | 0.308 | 0.126 | 0.02352358  |
| SYNRG    | 1.09E-06 | -0.532612029 | 0.142 | 0.375 | 0.023719336 |
| IL32     | 1.10E-06 | 0.339294721  | 0.992 | 0.989 | 0.024049836 |
| ODF3B    | 1.11E-06 | 0.386654423  | 0.133 | 0.027 | 0.024288205 |
| CST7     | 1.12E-06 | 0.381195832  | 0.942 | 0.905 | 0.024324106 |
| TNFRSF1A | 1.15E-06 | -0.502657418 | 0.067 | 0.28  | 0.025147518 |
| ADGRE5   | 1.24E-06 | 0.463936198  | 0.758 | 0.648 | 0.027108442 |
| CASP1    | 1.25E-06 | -0.492817673 | 0.225 | 0.463 | 0.027202073 |
| SAMHD1   | 1.26E-06 | -0.507074416 | 0.092 | 0.309 | 0.027566302 |
| CENPM    | 1.31E-06 | 0.261809056  | 0.125 | 0.023 | 0.028637667 |
| IQCG     | 1.50E-06 | 0.525577144  | 0.175 | 0.048 | 0.032780869 |
| CFL1     | 1.57E-06 | -0.292514365 | 0.908 | 0.973 | 0.034245142 |
| NDUFV2   | 1.67E-06 | 0.45153868   | 0.533 | 0.337 | 0.036479386 |
| FLI1     | 1.88E-06 | -0.46765258  | 0.142 | 0.371 | 0.040955012 |
| LDHA     | 1.95E-06 | 0.540697981  | 0.658 | 0.474 | 0.04261063  |
| ILF3-AS1 | 2.13E-06 | -0.529014394 | 0.083 | 0.288 | 0.046394154 |
| SIT1     | 2.13E-06 | -0.477318747 | 0.133 | 0.352 | 0.046411914 |

List of differentially expressed genes of IL7R CD4 T in reperfusion stage (PR versus EP)

| gene     | p val    | avg logFC    | pct.1 | pct.2 | p val adj |
|----------|----------|--------------|-------|-------|-----------|
| RPS29    | 1.61E-21 | 0.49204538   | 0.994 | 0.996 | 3.51E-17  |
| HSPD1    | 6.08E-21 | 1.777465719  | 0.737 | 0.413 | 1.33E-16  |
| SRGN     | 3.15E-18 | 0.694745316  | 0.981 | 0.934 | 6.87E-14  |
| FTH1     | 2.56E-17 | 0.814293406  | 1     | 0.971 | 5.59E-13  |
| HSPE1    | 2.99E-16 | 1.471268859  | 0.75  | 0.533 | 6.52E-12  |
| AIM1     | 5.07E-16 | 0.974283717  | 0.628 | 0.285 | 1.11E-11  |
| MYL12A   | 1.65E-15 | -0.654717163 | 0.756 | 0.926 | 3.60E-11  |
| FAM177A1 | 1.79E-15 | 1.054493779  | 0.596 | 0.248 | 3.91E-11  |
| HSPB1    | 2.08E-15 | 1.283389274  | 0.647 | 0.322 | 4.53E-11  |
| MTHFD2   | 3.29E-15 | 0.899589329  | 0.5   | 0.153 | 7.18E-11  |
| BATF     | 1.20E-14 | 0.867199005  | 0.679 | 0.314 | 2.62E-10  |
| ACTB     | 1.59E-13 | -0.488200033 | 0.994 | 1     | 3.46E-09  |

|            |          |              |       |       |             |
|------------|----------|--------------|-------|-------|-------------|
| HSP90AB1   | 1.87E-13 | 0.983716063  | 0.853 | 0.744 | 4.07E-09    |
| HSPH1      | 9.73E-13 | 1.463750537  | 0.551 | 0.273 | 2.12E-08    |
| DEFA3      | 2.65E-12 | -0.588041463 | 0.051 | 0.36  | 5.77E-08    |
| HLA-B      | 5.25E-12 | 0.400684844  | 0.994 | 0.988 | 1.15E-07    |
| PFN1       | 5.27E-12 | -0.537538817 | 0.904 | 0.979 | 1.15E-07    |
| TRAF3IP3   | 5.97E-12 | -0.814730662 | 0.103 | 0.413 | 1.30E-07    |
| HSP90AA1   | 7.52E-12 | 1.438483771  | 0.859 | 0.855 | 1.64E-07    |
| CREM       | 5.54E-11 | 0.783513272  | 0.622 | 0.355 | 1.21E-06    |
| CORO1A     | 6.41E-11 | -0.576354968 | 0.545 | 0.822 | 1.40E-06    |
| S100A4     | 1.52E-10 | -0.621214774 | 0.731 | 0.897 | 3.31E-06    |
| CCND3      | 1.88E-10 | -0.579867385 | 0.34  | 0.649 | 4.10E-06    |
| BCL3       | 2.00E-10 | 0.550839856  | 0.231 | 0.029 | 4.36E-06    |
| CD52       | 2.42E-10 | -0.549906761 | 0.66  | 0.843 | 5.27E-06    |
| LMNA       | 1.64E-09 | 0.898078798  | 0.397 | 0.14  | 3.58E-05    |
| RELB       | 2.66E-09 | 0.648337492  | 0.301 | 0.079 | 5.80E-05    |
| LCK        | 2.67E-09 | -0.646070309 | 0.282 | 0.574 | 5.82E-05    |
| CSK        | 2.72E-09 | -0.590466202 | 0.064 | 0.322 | 5.94E-05    |
| LDHA       | 4.77E-09 | 0.49983531   | 0.782 | 0.595 | 0.000104065 |
| ARID5A     | 6.40E-09 | 0.699013181  | 0.397 | 0.161 | 0.000139533 |
| CNOT6L     | 7.40E-09 | 0.590895814  | 0.481 | 0.227 | 0.000161283 |
| HBB        | 8.28E-09 | -0.663499846 | 0.096 | 0.36  | 0.00018058  |
| S100A8     | 8.55E-09 | -0.671657426 | 0.173 | 0.467 | 0.000186548 |
| BTG1       | 1.29E-08 | -0.361849633 | 0.974 | 1     | 0.000281373 |
| JUN        | 1.86E-08 | -0.53728445  | 0.692 | 0.897 | 0.000405972 |
| LAT        | 2.41E-08 | -0.574735157 | 0.154 | 0.421 | 0.000525702 |
| 9-Sep      | 2.76E-08 | -0.518320024 | 0.179 | 0.467 | 0.000601081 |
| IGLV2-14   | 3.50E-08 | -0.665699694 | 0.058 | 0.281 | 0.000764051 |
| TBC1D10C   | 4.14E-08 | -0.483602699 | 0.128 | 0.384 | 0.00090207  |
| EZR        | 4.39E-08 | 0.758509495  | 0.641 | 0.463 | 0.000957293 |
| CITED2     | 7.67E-08 | -0.59409763  | 0.494 | 0.781 | 0.001671688 |
| SLC7A5     | 1.05E-07 | 0.636933767  | 0.314 | 0.107 | 0.002297461 |
| SOD1       | 1.16E-07 | 0.62139276   | 0.686 | 0.545 | 0.002520388 |
| BIRC3      | 1.36E-07 | 0.796454402  | 0.474 | 0.252 | 0.002962047 |
| DRAP1      | 1.45E-07 | -0.519646474 | 0.122 | 0.36  | 0.003164827 |
| ITGA4      | 1.78E-07 | -0.631389355 | 0.115 | 0.343 | 0.003879232 |
| FKBP4      | 1.85E-07 | 0.757559728  | 0.288 | 0.107 | 0.004032038 |
| SARAF      | 2.20E-07 | 0.3296558    | 0.942 | 0.942 | 0.004804569 |
| PELI1      | 3.44E-07 | 0.564534553  | 0.25  | 0.07  | 0.007493161 |
| HLA-A      | 3.45E-07 | 0.280375373  | 1     | 0.971 | 0.007527773 |
| SNX9       | 3.49E-07 | 0.55120467   | 0.301 | 0.107 | 0.007610331 |
| FERMT3     | 3.59E-07 | -0.472386523 | 0.071 | 0.273 | 0.007825521 |
| AC006129.2 | 3.69E-07 | -0.580576529 | 0.135 | 0.368 | 0.008036584 |
| RCSD1      | 3.86E-07 | -0.493257147 | 0.167 | 0.409 | 0.008418237 |
| RNF19A     | 6.51E-07 | 0.641097301  | 0.385 | 0.186 | 0.01420292  |
| HLA-C      | 6.58E-07 | 0.31308804   | 0.981 | 0.979 | 0.014352504 |
| H3F3B      | 7.47E-07 | 0.356514994  | 0.994 | 0.967 | 0.016285247 |
| PRDM1      | 7.97E-07 | 0.600450543  | 0.551 | 0.355 | 0.017377514 |
| DUSP1      | 8.05E-07 | -0.442773997 | 0.872 | 0.946 | 0.017559829 |
| DDX21      | 8.64E-07 | 0.532084884  | 0.481 | 0.281 | 0.018842856 |
| SH2D2A     | 9.65E-07 | 0.71905929   | 0.385 | 0.194 | 0.021044148 |
| DNAJA4     | 1.29E-06 | 0.568486397  | 0.128 | 0.012 | 0.028137869 |
| IGKV2-30   | 1.59E-06 | -0.509630487 | 0.038 | 0.215 | 0.034760143 |
| SYAP1      | 1.88E-06 | 0.601962226  | 0.346 | 0.161 | 0.040962015 |

List of differentially expressed genes of PTGDS NK in reperfusion stage (PR versus EP)

| gene   | p val    | avg logFC    | pct.1 | pct.2 | p val adj |
|--------|----------|--------------|-------|-------|-----------|
| HLA-B  | 1.16E-24 | 0.523820774  | 1     | 0.993 | 2.54E-20  |
| B2M    | 5.87E-24 | 0.430143591  | 1     | 1     | 1.28E-19  |
| DEFA3  | 1.16E-20 | -1.140667673 | 0.034 | 0.489 | 2.52E-16  |
| CORO1A | 8.38E-19 | -0.773128438 | 0.536 | 0.922 | 1.83E-14  |
| MYOM2  | 1.19E-18 | -1.186449053 | 0.112 | 0.574 | 2.59E-14  |
| CD3E   | 1.22E-18 | -1.359147821 | 0.028 | 0.433 | 2.66E-14  |
| CST7   | 4.50E-18 | 0.647125065  | 1     | 0.986 | 9.82E-14  |
| LAIR2  | 2.71E-17 | 1.411457104  | 0.603 | 0.17  | 5.91E-13  |
| LCK    | 2.72E-17 | -0.995104196 | 0.151 | 0.617 | 5.93E-13  |
| CCL4   | 1.48E-16 | 0.8723943    | 0.978 | 0.965 | 3.22E-12  |
| GNLY   | 3.10E-16 | -0.690146854 | 0.536 | 0.993 | 6.76E-12  |

|          |          |              |       |       |             |
|----------|----------|--------------|-------|-------|-------------|
| RPS29    | 4.43E-16 | 0.611026725  | 0.983 | 0.872 | 9.67E-12    |
| NFKBIA   | 7.53E-16 | 0.66460417   | 0.978 | 0.837 | 1.64E-11    |
| GZMB     | 8.27E-16 | 0.684492252  | 0.972 | 0.965 | 1.80E-11    |
| SRGN     | 2.41E-14 | 0.522031466  | 0.989 | 0.993 | 5.26E-10    |
| HIF1A    | 9.76E-14 | 1.087514318  | 0.531 | 0.149 | 2.13E-09    |
| MT-CO3   | 4.82E-13 | -0.358122726 | 1     | 1     | 1.05E-08    |
| PRDM1    | 2.74E-12 | 0.847573272  | 0.715 | 0.426 | 5.98E-08    |
| HLA-C    | 2.86E-12 | 0.374863197  | 0.994 | 1     | 6.23E-08    |
| PFN1     | 3.34E-12 | -0.39027806  | 0.972 | 1     | 7.28E-08    |
| CCL4L2   | 5.47E-12 | 1.013717444  | 0.838 | 0.532 | 1.19E-07    |
| GBP2     | 9.66E-12 | 0.940848359  | 0.514 | 0.17  | 2.11E-07    |
| HBB      | 1.74E-11 | -0.811391436 | 0.061 | 0.369 | 3.79E-07    |
| ACTB     | 1.93E-11 | -0.451787225 | 1     | 1     | 4.21E-07    |
| KIR3DL2  | 1.10E-10 | 1.005929795  | 0.447 | 0.135 | 2.39E-06    |
| TC2N     | 3.77E-10 | -0.652772917 | 0.045 | 0.312 | 8.23E-06    |
| EIF3G    | 7.38E-10 | -0.645808285 | 0.464 | 0.773 | 1.61E-05    |
| PNRC1    | 7.95E-10 | 0.52983949   | 0.905 | 0.752 | 1.73E-05    |
| ISG20    | 8.43E-10 | 0.629389972  | 0.777 | 0.546 | 1.84E-05    |
| TNFAIP3  | 1.03E-09 | 0.758715255  | 0.777 | 0.518 | 2.25E-05    |
| MT-ATP6  | 1.97E-09 | -0.330253549 | 0.989 | 0.993 | 4.30E-05    |
| CALM1    | 3.76E-09 | -0.413715308 | 0.788 | 0.965 | 8.19E-05    |
| CD69     | 7.04E-09 | 0.753723455  | 0.939 | 0.865 | 0.000153515 |
| H3F3B    | 7.48E-09 | 0.322557117  | 0.994 | 0.993 | 0.00016321  |
| FTH1     | 7.68E-09 | 0.558819377  | 0.955 | 0.936 | 0.000167571 |
| LAT      | 8.24E-09 | -0.642136229 | 0.067 | 0.319 | 0.000179769 |
| S100A4   | 9.01E-09 | -0.531226087 | 0.743 | 0.95  | 0.000196549 |
| GADD45B  | 9.56E-09 | 0.630992657  | 0.888 | 0.787 | 0.000208546 |
| SAMD3    | 9.61E-09 | -0.63971307  | 0.19  | 0.504 | 0.000209565 |
| IFNG     | 9.65E-09 | 0.718545833  | 0.67  | 0.34  | 0.000210445 |
| IGKV3-15 | 1.19E-08 | -0.630644265 | 0.006 | 0.184 | 0.000260044 |
| SLC9A3R1 | 1.26E-08 | -0.621508902 | 0.307 | 0.617 | 0.000274878 |
| SYTL3    | 1.64E-08 | 0.679492444  | 0.715 | 0.56  | 0.000357804 |
| HCST     | 1.81E-08 | -0.452301358 | 0.788 | 0.929 | 0.000394944 |
| C1orf162 | 2.02E-08 | -0.650123087 | 0.19  | 0.489 | 0.00044088  |
| RASGRP2  | 2.33E-08 | -0.696513891 | 0.123 | 0.39  | 0.000507652 |
| PTPRCAP  | 2.75E-08 | -0.436670108 | 0.749 | 0.936 | 0.000598705 |
| BATF     | 4.20E-08 | 0.863764357  | 0.436 | 0.191 | 0.000915468 |
| DDIT4    | 1.22E-07 | 0.480706874  | 0.933 | 0.894 | 0.002664547 |
| TBC1D10C | 1.27E-07 | -0.506373449 | 0.218 | 0.532 | 0.002772304 |
| ACTG1    | 1.37E-07 | -0.365815069 | 0.933 | 0.993 | 0.002996102 |
| CCL3L3   | 1.39E-07 | 1.084885801  | 0.553 | 0.319 | 0.00303224  |
| NACA     | 1.55E-07 | -0.32452496  | 0.866 | 0.979 | 0.003382851 |
| ANXA6    | 1.71E-07 | -0.543025209 | 0.179 | 0.461 | 0.00373705  |
| CNN2     | 1.88E-07 | -0.66004961  | 0.084 | 0.312 | 0.004089397 |
| CIRBP    | 2.05E-07 | 0.46679209   | 0.838 | 0.723 | 0.004480789 |
| MT-ND3   | 2.37E-07 | 0.355880354  | 0.983 | 1     | 0.005173235 |
| RGS2     | 2.81E-07 | -0.899428571 | 0.056 | 0.255 | 0.006134261 |
| S100A8   | 3.20E-07 | -0.614888487 | 0.162 | 0.433 | 0.006979776 |
| SH2D2A   | 3.41E-07 | 0.636181478  | 0.525 | 0.284 | 0.007439357 |
| RGS19    | 3.96E-07 | -0.603511756 | 0.084 | 0.312 | 0.008632638 |
| BIN1     | 4.10E-07 | -0.595864402 | 0.101 | 0.333 | 0.008950193 |
| SLA      | 4.33E-07 | 0.696684377  | 0.559 | 0.362 | 0.009448392 |
| IL2RB    | 4.51E-07 | -0.540118699 | 0.285 | 0.596 | 0.009846236 |
| HSPA8    | 4.65E-07 | -0.30384536  | 0.804 | 0.929 | 0.010149746 |
| CD99     | 4.98E-07 | -0.384100585 | 0.709 | 0.901 | 0.010856872 |
| P2RY8    | 7.85E-07 | -0.488602234 | 0.028 | 0.199 | 0.017108606 |
| ACAP1    | 9.79E-07 | -0.544340701 | 0.207 | 0.475 | 0.021348173 |
| RELB     | 1.02E-06 | 0.773317796  | 0.302 | 0.092 | 0.022287664 |
| HLA-DRB1 | 1.13E-06 | -0.36907006  | 0.156 | 0.418 | 0.024620018 |
| NFKB2    | 1.70E-06 | 0.641097603  | 0.251 | 0.057 | 0.037072198 |
| STAT1    | 1.74E-06 | 0.646418984  | 0.279 | 0.078 | 0.037898685 |
| HRASLS2  | 1.82E-06 | -0.519954903 | 0.05  | 0.234 | 0.039716834 |
| IGKV1-12 | 1.91E-06 | -0.437865358 | 0     | 0.121 | 0.041647193 |
| NFKBIZ   | 2.16E-06 | 0.794140726  | 0.598 | 0.39  | 0.046999865 |

List of differentially expressed genes of TRBV9 CD8 Teff in reperfusion stage (PR versus EP)

| gene | p val | avg logFC | pct.1 | pct.2 | p val adj |
|------|-------|-----------|-------|-------|-----------|
|------|-------|-----------|-------|-------|-----------|

|             |          |              |       |       |             |
|-------------|----------|--------------|-------|-------|-------------|
| RPS29       | 8.13E-20 | 0.695713535  | 0.983 | 0.981 | 1.77E-15    |
| TRAV38-2DV8 | 9.95E-16 | -1.487751452 | 0.075 | 0.571 | 2.17E-11    |
| HLA-B       | 1.51E-15 | 0.464962927  | 1     | 1     | 3.29E-11    |
| TRBV13      | 7.95E-15 | 2.180406841  | 0.45  | 0     | 1.73E-10    |
| TRBV9       | 3.39E-14 | -1.520573927 | 0.142 | 0.6   | 7.39E-10    |
| CD52        | 3.97E-14 | -0.831924803 | 0.658 | 0.952 | 8.65E-10    |
| RPS27       | 5.18E-12 | 0.344246775  | 1     | 1     | 1.13E-07    |
| DUSP1       | 2.99E-11 | -0.783189837 | 0.708 | 0.914 | 6.51E-07    |
| DEFA3       | 5.06E-11 | -0.873806286 | 0.033 | 0.39  | 1.10E-06    |
| S100A4      | 7.53E-11 | -0.640796909 | 0.925 | 0.99  | 1.64E-06    |
| SRGN        | 1.70E-10 | 0.508031703  | 0.992 | 0.981 | 3.71E-06    |
| SYTL3       | 1.78E-10 | 0.857191564  | 0.75  | 0.467 | 3.88E-06    |
| GZMB        | 9.56E-10 | 0.78548654   | 0.967 | 0.819 | 2.09E-05    |
| VIM         | 1.42E-08 | -0.546297954 | 0.658 | 0.914 | 0.000309022 |
| MT-ND3      | 1.50E-08 | 0.50204372   | 1     | 0.99  | 0.000326888 |
| TRAV17      | 2.76E-08 | 1.151057253  | 0.275 | 0.01  | 0.000601959 |
| S100A6      | 4.13E-08 | -0.490873875 | 0.742 | 0.943 | 0.000901545 |
| MT1E        | 5.17E-08 | -0.436760086 | 0.125 | 0.467 | 0.001127607 |
| CD160       | 6.91E-08 | -0.661674783 | 0.008 | 0.238 | 0.001506603 |
| RPL37A      | 8.86E-08 | 0.372322002  | 0.992 | 0.952 | 0.001932124 |
| GADD45B     | 1.27E-07 | 0.708182415  | 0.833 | 0.629 | 0.002762975 |
| CORO1A      | 3.28E-07 | -0.518500012 | 0.675 | 0.886 | 0.007159248 |
| SH2D2A      | 8.94E-07 | 0.641304034  | 0.508 | 0.21  | 0.01950466  |
| JUN         | 9.96E-07 | -0.558149441 | 0.567 | 0.819 | 0.021728654 |
| KLRB1       | 1.27E-06 | 0.767580614  | 0.592 | 0.267 | 0.02759171  |
| CNN2        | 1.37E-06 | -0.760394258 | 0.217 | 0.514 | 0.029788249 |
| CD3E        | 1.40E-06 | -0.405438376 | 0.833 | 0.952 | 0.030629827 |
| PRDM1       | 1.89E-06 | 0.764345399  | 0.592 | 0.333 | 0.041246082 |

List of differentially expressed genes of STMN1 NK-cycling in reperfusion stage (PR versus EP)

| gene     | p val    | avg logFC    | pct.1 | pct.2 | p val adj   |
|----------|----------|--------------|-------|-------|-------------|
| RELB     | 2.06E-13 | 1.300348985  | 0.692 | 0.07  | 4.48E-09    |
| NFKB2    | 1.78E-11 | 0.95560249   | 0.692 | 0.1   | 3.89E-07    |
| HSPD1    | 5.47E-10 | 1.757245543  | 0.923 | 0.45  | 1.19E-05    |
| BIRC3    | 4.75E-09 | 1.098563487  | 0.538 | 0.07  | 0.000103536 |
| HSP90AB1 | 5.81E-09 | 1.321491792  | 1     | 0.72  | 0.0001266   |
| SRGN     | 8.40E-09 | 0.792676492  | 1     | 0.99  | 0.000183287 |
| BCL3     | 3.06E-08 | 0.728436717  | 0.462 | 0.05  | 0.000667698 |
| MYL12A   | 3.65E-08 | -0.754616523 | 0.962 | 1     | 0.000796247 |
| LYST     | 4.53E-08 | 0.83424971   | 0.808 | 0.26  | 0.0009878   |
| PTPRCAP  | 6.83E-08 | -0.82242316  | 0.885 | 0.97  | 0.001488466 |
| HSP90AA1 | 1.07E-07 | 0.989428236  | 1     | 0.99  | 0.002338342 |
| KIR2DL4  | 1.99E-07 | 0.771439625  | 0.423 | 0.05  | 0.004342851 |
| NOP58    | 2.52E-07 | 0.861538206  | 0.731 | 0.29  | 0.005499465 |
| IRF8     | 2.65E-07 | 0.873490481  | 0.462 | 0.07  | 0.005788861 |
| CD72     | 4.06E-07 | 0.565618837  | 0.385 | 0.04  | 0.008858909 |
| HSPE1    | 5.53E-07 | 1.426215876  | 0.885 | 0.75  | 0.012058158 |
| NINJ1    | 6.30E-07 | 0.754362223  | 0.462 | 0.07  | 0.013734395 |
| FKBP4    | 6.56E-07 | 0.900272243  | 0.538 | 0.12  | 0.014300038 |
| HLA-B    | 7.56E-07 | 0.354989676  | 1     | 1     | 0.016494783 |
| SQSTM1   | 9.24E-07 | 0.88345055   | 0.962 | 0.71  | 0.020151215 |
| SPAG4    | 9.94E-07 | 0.355071033  | 0.231 | 0     | 0.021674731 |
| SYTL3    | 1.74E-06 | 0.790148529  | 0.885 | 0.55  | 0.037866668 |
| SYAP1    | 1.76E-06 | 0.82118838   | 0.692 | 0.25  | 0.038343784 |
| CORO1A   | 2.09E-06 | -0.705967413 | 0.885 | 0.99  | 0.045601022 |

List of differentially expressed genes of XCL2 NK in reperfusion stage (PR versus EP)

| gene     | p val    | avg logFC    | pct.1 | pct.2 | p val adj   |
|----------|----------|--------------|-------|-------|-------------|
| CREM     | 7.66E-13 | 1.69361501   | 0.828 | 0.138 | 1.67E-08    |
| PFN1     | 2.25E-08 | -0.64073968  | 0.966 | 1     | 0.000490558 |
| HSP90AA1 | 5.35E-08 | 1.555807717  | 0.966 | 0.805 | 0.001167247 |
| HSPD1    | 6.18E-08 | 1.938812949  | 0.759 | 0.345 | 0.00134795  |
| ACTB     | 6.65E-08 | -0.519394517 | 1     | 1     | 0.001450415 |

|        |          |             |       |       |             |
|--------|----------|-------------|-------|-------|-------------|
| AREG   | 3.06E-07 | 1.058548593 | 0.897 | 0.402 | 0.006672001 |
| STAT3  | 3.96E-07 | 1.1401577   | 0.655 | 0.218 | 0.008639454 |
| HMGB2  | 7.30E-07 | 1.19220818  | 0.586 | 0.149 | 0.015921425 |
| SRGN   | 1.58E-06 | 0.626265785 | 1     | 0.989 | 0.034424996 |
| SH2D2A | 2.19E-06 | 0.980060295 | 0.724 | 0.276 | 0.047731639 |

List of differentially expressed genes of XCL1 NK in reperfusion stage (PR versus EP)

| gene     | p val    | avg logFC    | pct.1 | pct.2 | p val adj   |
|----------|----------|--------------|-------|-------|-------------|
| FAM177A1 | 3.10E-10 | 1.41156954   | 0.88  | 0.282 | 6.77E-06    |
| CD74     | 2.51E-08 | 1.097577558  | 1     | 0.704 | 0.000547475 |
| HIF1A    | 1.08E-07 | 1.118392394  | 0.68  | 0.155 | 0.002347343 |
| HLA-B    | 2.71E-07 | 0.527725127  | 1     | 1     | 0.005907822 |
| NFKB2    | 4.39E-07 | 0.989340469  | 0.52  | 0.07  | 0.009567839 |
| RELB     | 7.20E-07 | 1.128162496  | 0.52  | 0.085 | 0.015699868 |
| DENND2D  | 1.93E-06 | -1.254265885 | 0.2   | 0.775 | 0.042109517 |
| HSPD1    | 1.93E-06 | 1.809060491  | 0.76  | 0.324 | 0.042135007 |

List of differentially expressed genes of STMN1 T-cycling in reperfusion stage (PR versus EP)

| gene     | p val    | avg logFC    | pct.1 | pct.2 | p val adj   |
|----------|----------|--------------|-------|-------|-------------|
| RELB     | 3.77E-13 | 1.424862839  | 0.778 | 0.103 | 8.22E-09    |
| NFKB2    | 2.04E-11 | 1.241949758  | 0.694 | 0.088 | 4.45E-07    |
| HSP90AB1 | 2.65E-11 | 1.517584822  | 1     | 0.809 | 5.78E-07    |
| HSPD1    | 4.25E-11 | 2.272745016  | 0.861 | 0.441 | 9.27E-07    |
| SRGN     | 6.06E-11 | 0.878952956  | 1     | 0.971 | 1.32E-06    |
| HSP90AA1 | 1.37E-10 | 1.74356844   | 1     | 0.971 | 2.99E-06    |
| FEZ1     | 2.66E-09 | 1.251860004  | 0.639 | 0.132 | 5.80E-05    |
| SLC7A5   | 3.42E-09 | 0.97274761   | 0.861 | 0.353 | 7.46E-05    |
| CALM2    | 7.88E-09 | -0.789790379 | 0.833 | 0.985 | 0.000171802 |
| UBE2C    | 8.23E-09 | -1.070431634 | 0.694 | 0.926 | 0.00017958  |
| HLA-A    | 1.01E-08 | 0.490489011  | 1     | 1     | 0.000220066 |
| HSPH1    | 1.09E-08 | 1.859602344  | 0.722 | 0.25  | 0.00023711  |
| HLA-B    | 2.52E-08 | 0.496952915  | 1     | 1     | 0.000549068 |
| SYTL3    | 4.83E-08 | 0.89006737   | 0.861 | 0.456 | 0.001052965 |
| HSPE1    | 5.00E-08 | 1.733749418  | 0.806 | 0.588 | 0.001089934 |
| HSPA1A   | 5.12E-08 | 2.431293032  | 0.833 | 0.559 | 0.001117292 |
| HMGB2    | 5.36E-08 | -0.638576872 | 0.972 | 0.985 | 0.001169679 |
| HSPB1    | 6.85E-08 | 1.046071955  | 0.833 | 0.515 | 0.001494365 |
| CST7     | 9.23E-08 | 0.820185777  | 0.972 | 0.706 | 0.002013428 |
| CD7      | 9.84E-08 | 0.925277582  | 0.917 | 0.779 | 0.002146457 |
| SMC4     | 1.08E-07 | -0.812503214 | 0.667 | 0.912 | 0.002358369 |
| MYL12A   | 1.69E-07 | -0.705484993 | 0.889 | 0.971 | 0.003678819 |
| LMNB1    | 1.84E-07 | -0.864105845 | 0.306 | 0.853 | 0.004019056 |
| SYAP1    | 2.97E-07 | 1.073480395  | 0.694 | 0.309 | 0.006473323 |
| DLGAP5   | 3.18E-07 | -0.9243318   | 0.167 | 0.735 | 0.006939434 |
| PLK1     | 3.50E-07 | -0.910432383 | 0.139 | 0.676 | 0.007634794 |
| CDCA3    | 4.15E-07 | -0.815834769 | 0.139 | 0.691 | 0.009053963 |
| CKAP2    | 5.23E-07 | -0.856670537 | 0.278 | 0.779 | 0.011415794 |
| RHEB     | 5.97E-07 | -0.821110569 | 0.444 | 0.882 | 0.013009624 |
| HMMR     | 6.25E-07 | -0.832387115 | 0.389 | 0.824 | 0.013626733 |
| FAM177A1 | 8.41E-07 | 0.909478085  | 0.75  | 0.353 | 0.018344764 |
| PDE4A    | 9.84E-07 | 0.587328669  | 0.361 | 0.015 | 0.021449442 |
| CDC25B   | 9.96E-07 | -0.797922048 | 0.444 | 0.838 | 0.0217196   |
| TNFRSF1B | 1.06E-06 | 0.860663566  | 0.694 | 0.279 | 0.023139858 |
| CDC20    | 1.35E-06 | -0.927281265 | 0.389 | 0.794 | 0.029353376 |
| DEPDC1B  | 1.68E-06 | -0.752711266 | 0.167 | 0.676 | 0.036743624 |
| ODF3B    | 1.75E-06 | 0.556217507  | 0.306 | 0     | 0.038078797 |
| USP36    | 1.77E-06 | 0.730731725  | 0.583 | 0.176 | 0.038502897 |
| TUBA1B   | 1.88E-06 | -0.589117912 | 1     | 1     | 0.041025088 |
| CREM     | 1.93E-06 | 1.073032482  | 0.694 | 0.338 | 0.042185853 |
| CDKN2D   | 2.01E-06 | -0.827968388 | 0.306 | 0.735 | 0.043870021 |
| CORO1A   | 2.15E-06 | -0.619338167 | 0.861 | 0.971 | 0.046800674 |
| MXD3     | 2.23E-06 | -0.796294179 | 0.056 | 0.529 | 0.048574267 |

List of differentially expressed genes of TRDV2  $\gamma\delta$  T in reperfusion stage (PR versus EP)

| gene | p val | avg logFC | pct.1 | pct.2 | p val adj |
|------|-------|-----------|-------|-------|-----------|
| NA   |       |           |       |       |           |



**Table 16: List of DEGs of NK/T cell clusters in overall stage (PR versus PP)**

| List of differentially expressed genes of CD8B CD8 Tem in overall stage (PR versus PP) |          |              |       |       |           |
|----------------------------------------------------------------------------------------|----------|--------------|-------|-------|-----------|
| gene                                                                                   | p_val    | avg_logFC    | pct.1 | pct.2 | p_val_adj |
| HSP90AA1                                                                               | 5.84E-52 | 1.864173465  | 0.923 | 0.753 | 1.27E-47  |
| HSPD1                                                                                  | 2.06E-50 | 2.187888599  | 0.711 | 0.286 | 4.50E-46  |
| ACTB                                                                                   | 2.62E-39 | -0.551272671 | 0.963 | 0.998 | 5.72E-35  |
| DEFA3                                                                                  | 3.69E-38 | -1.311068333 | 0.051 | 0.532 | 8.05E-34  |
| PFN1                                                                                   | 1.22E-37 | -0.62228755  | 0.868 | 0.982 | 2.67E-33  |
| HSPH1                                                                                  | 5.33E-37 | 1.680984764  | 0.579 | 0.18  | 1.16E-32  |
| MYL12A                                                                                 | 3.82E-33 | -0.739800013 | 0.608 | 0.908 | 8.33E-29  |
| RPS29                                                                                  | 3.85E-33 | 0.518891318  | 0.985 | 0.965 | 8.40E-29  |
| HSPE1                                                                                  | 8.01E-33 | 1.680278076  | 0.718 | 0.442 | 1.75E-28  |
| CORO1A                                                                                 | 1.59E-32 | -0.849035626 | 0.458 | 0.814 | 3.48E-28  |
| HSPB1                                                                                  | 1.94E-32 | 1.444236801  | 0.597 | 0.235 | 4.24E-28  |
| CREM                                                                                   | 2.85E-32 | 0.965896948  | 0.678 | 0.268 | 6.21E-28  |
| HSP90AB1                                                                               | 1.10E-28 | 1.052010184  | 0.868 | 0.703 | 2.40E-24  |
| FAM177A1                                                                               | 1.59E-27 | 1.081384768  | 0.564 | 0.225 | 3.47E-23  |
| HBB                                                                                    | 2.03E-27 | -1.123161167 | 0.088 | 0.481 | 4.42E-23  |
| GZMA                                                                                   | 6.51E-26 | -0.679694614 | 0.615 | 0.865 | 1.42E-21  |
| CCND3                                                                                  | 1.60E-25 | -0.817193139 | 0.278 | 0.663 | 3.50E-21  |
| HSPA1A                                                                                 | 7.34E-25 | 1.615767382  | 0.656 | 0.346 | 1.60E-20  |
| BATF                                                                                   | 1.85E-23 | 0.951329101  | 0.52  | 0.209 | 4.04E-19  |
| RPS27                                                                                  | 5.66E-23 | 0.277321558  | 0.993 | 0.996 | 1.23E-18  |
| LITAF                                                                                  | 9.09E-22 | 0.725277029  | 0.733 | 0.454 | 1.98E-17  |
| HCST                                                                                   | 1.44E-20 | -0.527467436 | 0.681 | 0.894 | 3.15E-16  |
| PTPRCAP                                                                                | 4.11E-20 | -0.510143672 | 0.685 | 0.883 | 8.96E-16  |
| SH2D2A                                                                                 | 4.53E-20 | 0.826913847  | 0.469 | 0.194 | 9.87E-16  |
| S100A4                                                                                 | 2.10E-19 | -0.675100708 | 0.535 | 0.793 | 4.58E-15  |
| LDHA                                                                                   | 2.74E-19 | 0.668545944  | 0.711 | 0.442 | 5.97E-15  |
| CLIC1                                                                                  | 2.86E-19 | -0.577877213 | 0.491 | 0.763 | 6.24E-15  |
| SOD1                                                                                   | 4.35E-19 | 0.866477086  | 0.656 | 0.427 | 9.48E-15  |
| TNFAIP3                                                                                | 8.45E-19 | 0.670307638  | 0.637 | 0.335 | 1.84E-14  |
| UBB                                                                                    | 6.08E-18 | 0.596387988  | 0.872 | 0.73  | 1.33E-13  |
| RELB                                                                                   | 2.15E-17 | 0.727553872  | 0.245 | 0.043 | 4.68E-13  |
| SRGN                                                                                   | 8.38E-17 | 0.394618722  | 0.985 | 0.969 | 1.83E-12  |
| CD3E                                                                                   | 1.11E-16 | -0.357461551 | 0.868 | 0.943 | 2.41E-12  |
| PTMA                                                                                   | 2.54E-16 | 0.358246532  | 1     | 0.973 | 5.53E-12  |
| RPS21                                                                                  | 4.28E-16 | 0.272844132  | 0.996 | 0.99  | 9.34E-12  |
| PPP1R18                                                                                | 7.80E-16 | -0.739678699 | 0.147 | 0.429 | 1.70E-11  |
| NOP58                                                                                  | 1.14E-15 | 0.730857877  | 0.469 | 0.219 | 2.49E-11  |
| SARAF                                                                                  | 1.16E-15 | 0.410412016  | 0.945 | 0.885 | 2.53E-11  |
| LCK                                                                                    | 2.04E-15 | -0.566633735 | 0.326 | 0.611 | 4.44E-11  |
| ISG20                                                                                  | 3.25E-15 | 0.658299954  | 0.659 | 0.464 | 7.10E-11  |
| GZMK                                                                                   | 3.43E-15 | -0.533968975 | 0.667 | 0.834 | 7.47E-11  |
| LMNA                                                                                   | 6.03E-15 | 0.794955339  | 0.216 | 0.039 | 1.31E-10  |
| STAT3                                                                                  | 6.37E-15 | 0.677930401  | 0.476 | 0.239 | 1.39E-10  |
| SYAP1                                                                                  | 6.96E-15 | 0.807381417  | 0.355 | 0.131 | 1.52E-10  |
| FOS                                                                                    | 6.96E-15 | 0.468351802  | 0.886 | 0.671 | 1.52E-10  |
| LAT                                                                                    | 7.93E-15 | -0.604634085 | 0.147 | 0.431 | 1.73E-10  |
| CNOT6L                                                                                 | 8.57E-15 | 0.68958627   | 0.469 | 0.229 | 1.87E-10  |
| CACYBP                                                                                 | 2.27E-14 | 0.950599116  | 0.407 | 0.186 | 4.96E-10  |
| ODC1                                                                                   | 4.18E-14 | 0.709762515  | 0.355 | 0.137 | 9.11E-10  |
| FTH1                                                                                   | 6.49E-14 | 0.638106141  | 0.952 | 0.933 | 1.42E-09  |
| H3F3B                                                                                  | 7.12E-14 | 0.374508177  | 0.993 | 0.961 | 1.55E-09  |
| HMGB2                                                                                  | 1.04E-13 | 0.802594886  | 0.48  | 0.266 | 2.28E-09  |
| SH3BGRL3                                                                               | 1.50E-13 | -0.367534829 | 0.725 | 0.89  | 3.27E-09  |
| GZMB                                                                                   | 2.60E-13 | 1.138936569  | 0.333 | 0.133 | 5.68E-09  |
| CKLF                                                                                   | 4.15E-13 | -0.595923801 | 0.176 | 0.44  | 9.06E-09  |
| ROMO1                                                                                  | 4.88E-13 | 0.639914763  | 0.436 | 0.213 | 1.06E-08  |
| NFKBIA                                                                                 | 7.52E-13 | 0.49782323   | 0.773 | 0.581 | 1.64E-08  |
| PPP1CB                                                                                 | 1.35E-12 | 0.630374313  | 0.333 | 0.129 | 2.94E-08  |
| IL10                                                                                   | 1.70E-12 | 1.070152046  | 0.154 | 0.02  | 3.70E-08  |
| PIK3R1                                                                                 | 2.40E-12 | 0.528454585  | 0.696 | 0.491 | 5.23E-08  |
| DENND2D                                                                                | 2.44E-12 | -0.640776403 | 0.125 | 0.366 | 5.33E-08  |
| SLC9A3R1                                                                               | 2.52E-12 | -0.526527591 | 0.22  | 0.483 | 5.50E-08  |
| USP36                                                                                  | 3.48E-12 | 0.565566935  | 0.26  | 0.078 | 7.59E-08  |
| TNFRSF9                                                                                | 4.04E-12 | 0.720911474  | 0.264 | 0.088 | 8.82E-08  |
| TSPYL2                                                                                 | 4.49E-12 | 0.625337364  | 0.513 | 0.288 | 9.79E-08  |
| CD99                                                                                   | 4.84E-12 | -0.362544894 | 0.681 | 0.861 | 1.06E-07  |
| APOBEC3G                                                                               | 5.27E-12 | -0.60104459  | 0.099 | 0.323 | 1.15E-07  |

|          |          |              |       |       |             |
|----------|----------|--------------|-------|-------|-------------|
| CD7      | 1.07E-11 | 0.630706163  | 0.696 | 0.579 | 2.33E-07    |
| RAC2     | 1.15E-11 | -0.415288908 | 0.509 | 0.759 | 2.51E-07    |
| RHBDD2   | 1.23E-11 | 0.547261606  | 0.267 | 0.088 | 2.68E-07    |
| MTHFD2   | 2.23E-11 | 0.691524603  | 0.311 | 0.129 | 4.86E-07    |
| EIF1     | 2.40E-11 | 0.285116151  | 0.989 | 0.975 | 5.24E-07    |
| EZR      | 2.53E-11 | 0.685321829  | 0.549 | 0.374 | 5.52E-07    |
| SH3BP1   | 3.03E-11 | -0.573015922 | 0.04  | 0.221 | 6.62E-07    |
| ATP1B3   | 3.15E-11 | 0.715551642  | 0.392 | 0.194 | 6.88E-07    |
| DNAJB6   | 3.26E-11 | 0.687691074  | 0.509 | 0.315 | 7.10E-07    |
| TRAF3IP3 | 4.71E-11 | -0.607463216 | 0.114 | 0.331 | 1.03E-06    |
| ITGB2    | 4.75E-11 | -0.509365547 | 0.37  | 0.603 | 1.04E-06    |
| KIAA1551 | 6.13E-11 | -0.556638276 | 0.278 | 0.511 | 1.34E-06    |
| S100A8   | 8.20E-11 | -0.718001041 | 0.168 | 0.415 | 1.79E-06    |
| ODF3B    | 8.63E-11 | 0.447723342  | 0.143 | 0.022 | 1.88E-06    |
| TBC1D10C | 1.57E-10 | -0.569861344 | 0.147 | 0.368 | 3.42E-06    |
| LCP2     | 1.59E-10 | -0.502587614 | 0.231 | 0.472 | 3.46E-06    |
| ALB      | 1.67E-10 | 0.489638256  | 0.179 | 0.041 | 3.63E-06    |
| IFITM2   | 2.17E-10 | 0.529366155  | 0.795 | 0.683 | 4.74E-06    |
| PTPN6    | 2.21E-10 | -0.487045311 | 0.081 | 0.28  | 4.83E-06    |
| AIM1     | 3.16E-10 | 0.603607755  | 0.462 | 0.266 | 6.88E-06    |
| EVL      | 3.21E-10 | -0.455123983 | 0.366 | 0.603 | 7.01E-06    |
| IRF1     | 3.39E-10 | 0.585911228  | 0.513 | 0.319 | 7.39E-06    |
| THEMIS   | 3.61E-10 | -0.496798457 | 0.125 | 0.342 | 7.86E-06    |
| PDLIM2   | 4.35E-10 | -0.539372463 | 0.062 | 0.241 | 9.49E-06    |
| FAM49B   | 4.43E-10 | -0.472880449 | 0.22  | 0.47  | 9.67E-06    |
| SAT1     | 4.46E-10 | 0.604773823  | 0.751 | 0.628 | 9.73E-06    |
| SLC7A5   | 4.50E-10 | 0.621772539  | 0.267 | 0.104 | 9.81E-06    |
| SOCS3    | 5.61E-10 | 0.597241086  | 0.278 | 0.112 | 1.22E-05    |
| SMAP2    | 7.14E-10 | 0.486072958  | 0.392 | 0.198 | 1.56E-05    |
| PGK1     | 7.27E-10 | 0.629874582  | 0.527 | 0.364 | 1.59E-05    |
| BCL3     | 9.14E-10 | 0.45988018   | 0.147 | 0.029 | 1.99E-05    |
| GPR171   | 1.06E-09 | 0.61045027   | 0.3   | 0.129 | 2.30E-05    |
| PPP1CA   | 1.43E-09 | -0.43773421  | 0.22  | 0.458 | 3.12E-05    |
| METTL12  | 1.64E-09 | 0.527978638  | 0.308 | 0.133 | 3.57E-05    |
| PRF1     | 1.86E-09 | 0.653649788  | 0.553 | 0.421 | 4.05E-05    |
| SIT1     | 2.82E-09 | -0.511104548 | 0.092 | 0.274 | 6.14E-05    |
| MAP1LC3A | 3.06E-09 | 0.484423026  | 0.136 | 0.027 | 6.68E-05    |
| OAZ1     | 3.50E-09 | 0.364228862  | 0.839 | 0.767 | 7.63E-05    |
| FAM173A  | 3.59E-09 | -0.511790164 | 0.022 | 0.164 | 7.83E-05    |
| CD48     | 4.03E-09 | -0.353921111 | 0.498 | 0.706 | 8.79E-05    |
| SRRT     | 4.80E-09 | 0.56997526   | 0.436 | 0.27  | 0.000104767 |
| GPSM3    | 5.11E-09 | -0.455419717 | 0.282 | 0.493 | 0.000111489 |
| ACAP1    | 5.47E-09 | -0.478432936 | 0.275 | 0.497 | 0.000119315 |
| IGKV2-24 | 7.08E-09 | -0.573277349 | 0.037 | 0.184 | 0.000154346 |
| PLEK     | 7.10E-09 | -0.488318628 | 0.114 | 0.301 | 0.000154728 |
| SDCBP    | 7.73E-09 | 0.589185076  | 0.377 | 0.217 | 0.000168667 |
| FKBP4    | 8.66E-09 | 0.719433917  | 0.238 | 0.096 | 0.000188898 |
| EMD      | 8.84E-09 | 0.505883901  | 0.388 | 0.217 | 0.00019286  |
| RAP1GDS1 | 8.90E-09 | -0.449724282 | 0.055 | 0.217 | 0.000194099 |
| CD27     | 8.95E-09 | -0.486916446 | 0.183 | 0.397 | 0.000195204 |
| SLC2A3   | 1.10E-08 | 0.405301599  | 0.663 | 0.499 | 0.000239969 |
| SQSTM1   | 1.40E-08 | 0.443589432  | 0.604 | 0.45  | 0.000305946 |
| TIFA     | 1.45E-08 | 0.466782132  | 0.158 | 0.041 | 0.000315884 |
| SBNO2    | 1.56E-08 | 0.391336309  | 0.114 | 0.018 | 0.000340387 |
| RGS19    | 1.68E-08 | -0.44525006  | 0.04  | 0.188 | 0.000367279 |
| ARID5A   | 1.94E-08 | 0.5317173    | 0.363 | 0.194 | 0.000422157 |
| DDX24    | 2.06E-08 | 0.445367694  | 0.582 | 0.391 | 0.000449619 |
| CCL4L2   | 2.10E-08 | -0.489659009 | 0.623 | 0.8   | 0.000458115 |
| HBA2     | 2.56E-08 | -0.444846697 | 0.026 | 0.157 | 0.000559288 |
| DAD1     | 2.58E-08 | -0.449595163 | 0.253 | 0.466 | 0.000561658 |
| C19orf60 | 2.84E-08 | -0.46883135  | 0.165 | 0.356 | 0.000619868 |
| STARD7   | 3.47E-08 | 0.561404218  | 0.282 | 0.137 | 0.000755947 |
| LEPROTL1 | 3.97E-08 | 0.508423755  | 0.597 | 0.472 | 0.0008651   |
| TSC22D4  | 4.37E-08 | -0.459206503 | 0.121 | 0.297 | 0.000952595 |
| CD3D     | 5.77E-08 | -0.300313296 | 0.597 | 0.757 | 0.001258935 |
| NEAT1    | 6.70E-08 | 0.405586088  | 0.63  | 0.468 | 0.001461264 |
| GADD45B  | 7.39E-08 | 0.484545953  | 0.777 | 0.712 | 0.001612459 |
| RBL2     | 7.70E-08 | -0.521405946 | 0.117 | 0.286 | 0.001678276 |
| DDX21    | 7.92E-08 | 0.508927344  | 0.366 | 0.213 | 0.001727394 |
| RPL36A   | 8.99E-08 | 0.341961154  | 0.828 | 0.763 | 0.001960525 |

|            |          |              |       |       |             |
|------------|----------|--------------|-------|-------|-------------|
| HLA-DQB1   | 9.49E-08 | 0.501993097  | 0.538 | 0.37  | 0.00206892  |
| LSP1       | 1.08E-07 | -0.446335954 | 0.399 | 0.575 | 0.002346138 |
| CXCR4      | 1.16E-07 | -0.328181733 | 0.864 | 0.939 | 0.002532696 |
| ACTR3      | 1.21E-07 | -0.399011137 | 0.293 | 0.507 | 0.002641223 |
| CD3G       | 1.28E-07 | -0.405664552 | 0.366 | 0.566 | 0.002782066 |
| PRDM1      | 1.33E-07 | 0.543362166  | 0.469 | 0.321 | 0.002889793 |
| NFKB2      | 1.37E-07 | 0.405504406  | 0.147 | 0.041 | 0.002988096 |
| ELL2       | 1.72E-07 | 0.428885363  | 0.194 | 0.072 | 0.003742629 |
| LIME1      | 1.85E-07 | -0.461256429 | 0.15  | 0.327 | 0.00402587  |
| CSK        | 1.92E-07 | -0.391563467 | 0.128 | 0.305 | 0.004190786 |
| NAMPT      | 2.02E-07 | 0.508454353  | 0.249 | 0.115 | 0.004406096 |
| RHOF       | 2.08E-07 | -0.399488976 | 0.114 | 0.278 | 0.004530608 |
| CDC25B     | 2.10E-07 | -0.459432422 | 0.04  | 0.168 | 0.004589871 |
| RAB37      | 2.27E-07 | -0.419228732 | 0.018 | 0.131 | 0.004956934 |
| PHYH       | 2.36E-07 | 0.365561305  | 0.128 | 0.031 | 0.005146893 |
| STX10      | 3.15E-07 | -0.386483621 | 0.044 | 0.176 | 0.006877091 |
| TMA7       | 3.17E-07 | -0.284692316 | 0.729 | 0.863 | 0.006923749 |
| TRAC       | 3.29E-07 | -0.557806057 | 0.128 | 0.288 | 0.007168271 |
| DUSP2      | 3.31E-07 | -0.30073126  | 0.857 | 0.9   | 0.00720999  |
| HRASLS2    | 3.95E-07 | -0.37657552  | 0.048 | 0.182 | 0.008609494 |
| IFITM1     | 4.03E-07 | 0.339361031  | 0.901 | 0.906 | 0.008796732 |
| GSPT1      | 4.22E-07 | 0.468484679  | 0.209 | 0.086 | 0.009204503 |
| MT2A       | 4.33E-07 | 2.455383383  | 0.56  | 0.444 | 0.009437091 |
| TNFRSF1A   | 4.46E-07 | -0.34718085  | 0.018 | 0.129 | 0.009727634 |
| MACF1      | 4.70E-07 | -0.435094378 | 0.132 | 0.297 | 0.010244495 |
| EML4       | 4.78E-07 | 0.428756638  | 0.509 | 0.366 | 0.010428469 |
| SKAP1      | 5.10E-07 | -0.419976321 | 0.238 | 0.423 | 0.01112987  |
| SELK       | 5.70E-07 | 0.441193665  | 0.491 | 0.354 | 0.012437368 |
| SERPINB9   | 5.73E-07 | 0.430439233  | 0.264 | 0.129 | 0.012487483 |
| MCL1       | 5.83E-07 | 0.406454478  | 0.608 | 0.495 | 0.01270782  |
| WAS        | 6.32E-07 | -0.375741759 | 0.201 | 0.38  | 0.013782106 |
| SC5D       | 7.51E-07 | 0.454677519  | 0.176 | 0.065 | 0.016381298 |
| SLC16A7    | 7.99E-07 | -0.380694701 | 0.037 | 0.157 | 0.017432521 |
| CD52       | 8.08E-07 | -0.439079678 | 0.37  | 0.544 | 0.017628296 |
| MRPL1      | 8.25E-07 | 0.404819906  | 0.179 | 0.067 | 0.017995635 |
| EMP3       | 8.43E-07 | -0.376881807 | 0.311 | 0.501 | 0.01838904  |
| AC092580.4 | 8.88E-07 | 0.554063008  | 0.249 | 0.125 | 0.019357063 |
| NUDC       | 9.38E-07 | 0.565352516  | 0.322 | 0.19  | 0.020460272 |
| ATP6V0E2   | 9.49E-07 | -0.417696925 | 0.062 | 0.19  | 0.020685923 |
| CD8B       | 1.00E-06 | -0.40889142  | 0.392 | 0.564 | 0.02182854  |
| APBB1IP    | 1.00E-06 | -0.39412883  | 0.242 | 0.421 | 0.021836642 |
| FAM129A    | 1.02E-06 | 0.432569148  | 0.227 | 0.102 | 0.022292134 |
| SP100      | 1.05E-06 | -0.413388334 | 0.234 | 0.407 | 0.022882274 |
| PDE4D      | 1.09E-06 | 0.357122572  | 0.168 | 0.059 | 0.023793243 |
| COX7A2L    | 1.10E-06 | -0.40954613  | 0.154 | 0.317 | 0.023963277 |
| LMNB1      | 1.12E-06 | 0.373436808  | 0.143 | 0.045 | 0.024411325 |
| SYTL3      | 1.25E-06 | 0.484874462  | 0.586 | 0.476 | 0.027236339 |
| S100A6     | 1.29E-06 | -0.338756728 | 0.546 | 0.72  | 0.028035533 |
| LY6E       | 1.31E-06 | -0.40388595  | 0.289 | 0.464 | 0.028572646 |
| HMGB1      | 1.35E-06 | -0.268800179 | 0.656 | 0.793 | 0.029442918 |
| LYST       | 1.37E-06 | 0.426252115  | 0.436 | 0.297 | 0.029961901 |
| HSPA8      | 1.50E-06 | 0.421179666  | 0.919 | 0.863 | 0.032718623 |
| PELI1      | 1.56E-06 | 0.342492114  | 0.117 | 0.031 | 0.033980018 |
| CISH       | 1.71E-06 | -0.400379177 | 0.015 | 0.11  | 0.037201231 |
| PFKFB3     | 1.75E-06 | 0.491655377  | 0.201 | 0.086 | 0.038172627 |
| C9orf142   | 1.76E-06 | -0.333766946 | 0.293 | 0.497 | 0.038427303 |
| TOX        | 1.77E-06 | -0.412744227 | 0.114 | 0.264 | 0.038708404 |
| TMC8       | 1.79E-06 | -0.414138962 | 0.125 | 0.276 | 0.039139299 |
| BCL2L1     | 1.98E-06 | -0.360848833 | 0.051 | 0.174 | 0.043217778 |
| TNIP2      | 1.99E-06 | 0.377106408  | 0.172 | 0.065 | 0.043368425 |
| HMG3       | 2.00E-06 | -0.350100795 | 0.092 | 0.235 | 0.043618229 |
| PIM3       | 2.24E-06 | 0.425639586  | 0.22  | 0.102 | 0.048784794 |

List of differentially expressed genes of GNLY NK in overall stage (PR versus PP)

| gene  | p val    | avg logFC    | pct.1 | pct.2 | p val adj |
|-------|----------|--------------|-------|-------|-----------|
| DEFA3 | 9.41E-26 | -1.282942518 | 0.031 | 0.514 | 2.05E-21  |
| HBB   | 9.23E-23 | -1.344750544 | 0.081 | 0.534 | 2.01E-18  |

|              |          |              |       |       |             |
|--------------|----------|--------------|-------|-------|-------------|
| GBP2         | 1.27E-21 | 0.889762791  | 0.569 | 0.222 | 2.78E-17    |
| LAIR2        | 3.04E-21 | 1.190346135  | 0.456 | 0.136 | 6.64E-17    |
| ACTB         | 1.07E-20 | -0.440374215 | 1     | 0.998 | 2.34E-16    |
| SDCBP        | 2.66E-20 | 0.906488881  | 0.638 | 0.306 | 5.81E-16    |
| RELB         | 5.25E-20 | 0.875146632  | 0.356 | 0.076 | 1.15E-15    |
| CD3E         | 2.88E-19 | -0.65128516  | 0.481 | 0.888 | 6.28E-15    |
| TMSB4X       | 6.46E-19 | -0.289212644 | 1     | 1     | 1.41E-14    |
| CORO1A       | 8.58E-18 | -0.674656225 | 0.575 | 0.862 | 1.87E-13    |
| NFKBIA       | 1.58E-17 | 0.701279738  | 0.912 | 0.704 | 3.44E-13    |
| HSP90AA1     | 1.72E-17 | 1.52680208   | 0.881 | 0.832 | 3.75E-13    |
| RPS29        | 4.04E-17 | 0.442404471  | 0.975 | 0.958 | 8.81E-13    |
| SYTL3        | 7.84E-17 | 0.690419915  | 0.738 | 0.482 | 1.71E-12    |
| PFN1         | 1.58E-16 | -0.362942801 | 0.988 | 1     | 3.45E-12    |
| SLC9A3R1     | 2.55E-16 | -0.716455066 | 0.35  | 0.706 | 5.57E-12    |
| S100A4       | 8.08E-16 | -0.460025426 | 0.881 | 0.98  | 1.76E-11    |
| FCER1G       | 1.65E-15 | 0.978868252  | 0.312 | 0.072 | 3.60E-11    |
| TNFAIP3      | 1.68E-15 | 0.738789019  | 0.712 | 0.43  | 3.66E-11    |
| SH3BGR13     | 8.10E-15 | -0.395727698 | 0.906 | 0.984 | 1.77E-10    |
| PTPRCAP      | 3.12E-14 | -0.455988909 | 0.744 | 0.92  | 6.81E-10    |
| SQSTM1       | 5.19E-14 | 0.687206263  | 0.762 | 0.592 | 1.13E-09    |
| BATF         | 1.06E-13 | 0.810696644  | 0.531 | 0.29  | 2.30E-09    |
| GZMA         | 1.36E-13 | -0.446368063 | 0.775 | 0.952 | 2.96E-09    |
| HSPD1        | 1.37E-13 | 1.634316557  | 0.525 | 0.302 | 2.98E-09    |
| ACTG1        | 1.42E-13 | -0.409812564 | 0.962 | 0.982 | 3.10E-09    |
| HSPB1        | 1.58E-13 | 1.199138824  | 0.481 | 0.228 | 3.44E-09    |
| CST7         | 2.40E-13 | 0.407252597  | 1     | 0.99  | 5.24E-09    |
| PRDM1        | 2.50E-13 | 0.652921524  | 0.688 | 0.454 | 5.46E-09    |
| GSTP1        | 5.71E-13 | -0.541319316 | 0.519 | 0.8   | 1.24E-08    |
| GZMH         | 5.74E-13 | -0.444961169 | 0.75  | 0.946 | 1.25E-08    |
| ALB          | 3.73E-12 | 0.605082972  | 0.181 | 0.028 | 8.13E-08    |
| SRGN         | 4.52E-12 | 0.378753343  | 0.988 | 0.988 | 9.87E-08    |
| LCK          | 5.13E-12 | -0.566064518 | 0.344 | 0.676 | 1.12E-07    |
| GNLY         | 8.20E-12 | -0.318371891 | 0.919 | 0.998 | 1.79E-07    |
| H3F3B        | 8.26E-12 | 0.345261086  | 0.981 | 0.96  | 1.80E-07    |
| ISG20        | 8.70E-12 | 0.507470284  | 0.794 | 0.588 | 1.90E-07    |
| NFKB2        | 1.70E-11 | 0.574226701  | 0.262 | 0.072 | 3.71E-07    |
| RGS19        | 3.63E-11 | -0.709386773 | 0.05  | 0.306 | 7.92E-07    |
| RAC2         | 5.12E-11 | -0.409879981 | 0.744 | 0.914 | 1.12E-06    |
| NEAT1        | 7.71E-11 | 0.532452404  | 0.812 | 0.654 | 1.68E-06    |
| LSP1         | 8.32E-11 | -0.445536326 | 0.562 | 0.836 | 1.82E-06    |
| HSPA1A       | 1.02E-10 | 1.864345099  | 0.588 | 0.37  | 2.22E-06    |
| TBC1D10C     | 1.37E-10 | -0.625490149 | 0.175 | 0.48  | 2.98E-06    |
| BCL3         | 1.44E-10 | 0.471761822  | 0.156 | 0.024 | 3.14E-06    |
| MYL12A       | 1.45E-10 | -0.3306826   | 0.869 | 0.98  | 3.17E-06    |
| GZMB         | 1.52E-10 | 0.423466741  | 0.975 | 0.976 | 3.31E-06    |
| HSPH1        | 1.93E-10 | 1.524293395  | 0.381 | 0.182 | 4.21E-06    |
| SLA2         | 2.48E-10 | 0.637221987  | 0.369 | 0.156 | 5.41E-06    |
| TC2N         | 5.94E-10 | -0.581202403 | 0.112 | 0.388 | 1.30E-05    |
| CTD-3252C9.4 | 6.89E-10 | 0.556617064  | 0.25  | 0.076 | 1.50E-05    |
| TRBC1        | 9.43E-10 | -0.418387485 | 0.65  | 0.9   | 2.06E-05    |
| ACAP1        | 9.57E-10 | -0.589703308 | 0.194 | 0.478 | 2.09E-05    |
| HIF1A        | 1.13E-09 | 0.656339387  | 0.419 | 0.206 | 2.47E-05    |
| ZBTB16       | 1.41E-09 | 0.519526273  | 0.181 | 0.04  | 3.08E-05    |
| CCL4         | 1.50E-09 | 0.569389049  | 0.944 | 0.958 | 3.26E-05    |
| RP11-284N8.3 | 3.12E-09 | 0.35100764   | 0.119 | 0.014 | 6.80E-05    |
| CSK          | 3.56E-09 | -0.623180102 | 0.15  | 0.408 | 7.77E-05    |
| NFKB1        | 4.06E-09 | 0.491125378  | 0.188 | 0.046 | 8.86E-05    |
| BIN1         | 4.21E-09 | -0.530420761 | 0.156 | 0.418 | 9.18E-05    |
| RPS19        | 4.46E-09 | -0.270076944 | 0.988 | 0.998 | 9.72E-05    |
| SH3BP1       | 4.86E-09 | -0.574740055 | 0.088 | 0.336 | 0.000106026 |
| KIR2DL3      | 5.39E-09 | 0.563151812  | 0.394 | 0.184 | 0.000117448 |
| ANKRD28      | 5.90E-09 | 0.573485149  | 0.362 | 0.158 | 0.000128736 |
| TRAF3IP3     | 6.14E-09 | -0.503272259 | 0.212 | 0.492 | 0.000133854 |
| HCST         | 6.78E-09 | -0.349616653 | 0.844 | 0.944 | 0.000147836 |
| NDUFB7       | 7.04E-09 | -0.533081783 | 0.169 | 0.448 | 0.000153523 |
| IL32         | 7.17E-09 | -0.305061732 | 0.744 | 0.94  | 0.000156283 |
| CCND3        | 9.17E-09 | -0.382755443 | 0.488 | 0.788 | 0.00020004  |
| SH2D2A       | 1.24E-08 | 0.618955754  | 0.531 | 0.352 | 0.000270714 |
| HPGD         | 1.38E-08 | 0.579841912  | 0.188 | 0.05  | 0.000300025 |
| CD63         | 1.79E-08 | -0.469347658 | 0.369 | 0.64  | 0.000389984 |

|            |          |              |       |       |             |
|------------|----------|--------------|-------|-------|-------------|
| CADM1      | 1.89E-08 | 0.523493028  | 0.2   | 0.056 | 0.000411272 |
| STOM       | 4.65E-08 | 0.541705018  | 0.538 | 0.372 | 0.001014552 |
| BIN2       | 5.75E-08 | -0.520531271 | 0.362 | 0.614 | 0.001254534 |
| CSTB       | 6.81E-08 | -0.537949709 | 0.138 | 0.372 | 0.001485888 |
| CNN2       | 9.40E-08 | -0.560025049 | 0.131 | 0.354 | 0.002051015 |
| GBP4       | 1.04E-07 | 0.494088678  | 0.288 | 0.12  | 0.00226722  |
| MT2A       | 1.09E-07 | 1.816632988  | 0.75  | 0.7   | 0.002381339 |
| PPP1CA     | 1.26E-07 | -0.368914419 | 0.394 | 0.69  | 0.00274587  |
| TSC22D4    | 1.49E-07 | -0.492727782 | 0.119 | 0.342 | 0.003241561 |
| VASP       | 1.71E-07 | -0.492027874 | 0.188 | 0.428 | 0.003739594 |
| PTGDS      | 1.84E-07 | 0.95440511   | 0.244 | 0.09  | 0.004007614 |
| S100A6     | 2.07E-07 | -0.270629515 | 0.788 | 0.926 | 0.004511499 |
| RASSF1     | 2.27E-07 | -0.479814842 | 0.188 | 0.428 | 0.004947169 |
| TTC38      | 2.31E-07 | -0.465638845 | 0.231 | 0.474 | 0.005037891 |
| SLFN5      | 3.10E-07 | -0.494526921 | 0.056 | 0.244 | 0.006766227 |
| FOS        | 3.85E-07 | 0.386713212  | 0.756 | 0.64  | 0.008397931 |
| SMAP2      | 4.08E-07 | 0.512239921  | 0.362 | 0.192 | 0.008898815 |
| MIR155HG   | 4.92E-07 | 0.506637065  | 0.15  | 0.038 | 0.010724396 |
| CD99       | 5.09E-07 | -0.277984089 | 0.85  | 0.95  | 0.011098097 |
| HSPE1      | 5.15E-07 | 1.552200847  | 0.519 | 0.416 | 0.011222823 |
| REL        | 5.35E-07 | 0.499978953  | 0.488 | 0.318 | 0.011670572 |
| CIRBP      | 5.54E-07 | 0.393680502  | 0.762 | 0.658 | 0.012086838 |
| HOPX       | 6.05E-07 | -0.338070524 | 0.644 | 0.844 | 0.01318776  |
| CXCR4      | 6.20E-07 | -0.381238656 | 0.681 | 0.878 | 0.013527443 |
| UBB        | 6.82E-07 | 0.420729841  | 0.856 | 0.83  | 0.014879418 |
| CCL3       | 6.93E-07 | 0.580212304  | 0.712 | 0.544 | 0.015107507 |
| CKLF       | 6.93E-07 | -0.434381493 | 0.15  | 0.364 | 0.01511323  |
| LAT        | 7.15E-07 | -0.42898973  | 0.169 | 0.41  | 0.015598111 |
| SPN        | 7.73E-07 | -0.46052858  | 0.25  | 0.478 | 0.016847893 |
| ADGRG1     | 9.05E-07 | -0.348324555 | 0.444 | 0.726 | 0.019742397 |
| 1-Sep      | 9.20E-07 | -0.434922799 | 0.194 | 0.414 | 0.020066053 |
| DENND2D    | 9.55E-07 | -0.38234574  | 0.281 | 0.532 | 0.020832717 |
| CALM1      | 9.61E-07 | -0.251362491 | 0.9   | 0.958 | 0.020961069 |
| GADD45B    | 9.74E-07 | 0.475177663  | 0.856 | 0.832 | 0.021241573 |
| ACTR3      | 1.22E-06 | -0.403638689 | 0.456 | 0.658 | 0.026552556 |
| ANXA6      | 1.27E-06 | -0.420270411 | 0.388 | 0.594 | 0.027699627 |
| GPSM3      | 1.34E-06 | -0.417102213 | 0.388 | 0.616 | 0.029117539 |
| ARPC1B     | 1.57E-06 | -0.357788984 | 0.456 | 0.7   | 0.034278342 |
| KIR2DL4    | 1.57E-06 | 0.424598901  | 0.131 | 0.032 | 0.034288269 |
| KLRC3      | 1.71E-06 | -0.355328995 | 0.425 | 0.672 | 0.037399566 |
| GMFG       | 1.72E-06 | -0.361383651 | 0.394 | 0.664 | 0.037487707 |
| TRG-AS1    | 1.74E-06 | -0.526936905 | 0.156 | 0.358 | 0.03784573  |
| AC241585.2 | 1.75E-06 | 0.391846626  | 0.169 | 0.052 | 0.038261456 |
| PLEK       | 1.81E-06 | -0.383901274 | 0.456 | 0.658 | 0.039403451 |
| HNRNPK     | 2.05E-06 | -0.35562536  | 0.512 | 0.748 | 0.044723549 |
| APBB1IP    | 2.15E-06 | -0.353571156 | 0.275 | 0.526 | 0.046782313 |
| SNAP23     | 2.24E-06 | 0.470128075  | 0.3   | 0.146 | 0.048804382 |
| IRF1       | 2.26E-06 | 0.484224819  | 0.656 | 0.544 | 0.049302064 |

List of differentially expressed genes of CCL20 CD8 MAIT in overall stage (PR versus PP)

| gene     | p val    | avg logFC    | pct.1 | pct.2 | p val adj |
|----------|----------|--------------|-------|-------|-----------|
| TNFRSF18 | 1.20E-41 | 0.903740807  | 0.383 | 0.008 | 2.62E-37  |
| BATF     | 1.13E-40 | 1.537429107  | 0.792 | 0.271 | 2.47E-36  |
| MT2A     | 6.55E-40 | 2.383184436  | 0.95  | 0.653 | 1.43E-35  |
| NFKB2    | 9.35E-39 | 1.19711472   | 0.617 | 0.114 | 2.04E-34  |
| RELB     | 7.42E-38 | 1.252317467  | 0.683 | 0.164 | 1.62E-33  |
| NFKB1    | 6.10E-36 | 1.245655728  | 0.658 | 0.154 | 1.33E-31  |
| HSP90AA1 | 1.28E-34 | 1.768541618  | 0.95  | 0.842 | 2.79E-30  |
| CD7      | 3.35E-32 | 0.862137875  | 0.983 | 0.83  | 7.31E-28  |
| SLC7A5   | 1.15E-31 | 1.048187252  | 0.758 | 0.271 | 2.52E-27  |
| FEZ1     | 1.46E-28 | 1.196286331  | 0.567 | 0.142 | 3.18E-24  |
| CREM     | 6.38E-28 | 1.064556889  | 0.817 | 0.379 | 1.39E-23  |
| HSPD1    | 4.81E-27 | 1.737570699  | 0.767 | 0.393 | 1.05E-22  |
| FURIN    | 1.08E-26 | 0.833281343  | 0.333 | 0.028 | 2.36E-22  |
| MYL12A   | 2.71E-26 | -0.727655488 | 0.833 | 0.966 | 5.92E-22  |
| SYTL3    | 1.19E-24 | 0.950964227  | 0.842 | 0.475 | 2.60E-20  |
| CORO1A   | 4.81E-24 | -0.803664853 | 0.633 | 0.918 | 1.05E-19  |

|          |          |              |       |       |          |
|----------|----------|--------------|-------|-------|----------|
| TXNIP    | 2.06E-23 | -0.973456572 | 0.408 | 0.856 | 4.48E-19 |
| SYAP1    | 4.30E-23 | 1.035702392  | 0.592 | 0.188 | 9.38E-19 |
| FAM177A1 | 2.47E-22 | 1.15938103   | 0.7   | 0.343 | 5.40E-18 |
| SRGN     | 6.59E-22 | 0.66284383   | 0.975 | 0.968 | 1.44E-17 |
| DEFA3    | 1.18E-21 | -1.199488235 | 0.042 | 0.545 | 2.57E-17 |
| HSPE1    | 4.04E-21 | 1.455270736  | 0.775 | 0.483 | 8.81E-17 |
| S100A4   | 4.50E-21 | -0.500483859 | 0.933 | 0.99  | 9.81E-17 |
| HLA-B    | 7.30E-21 | 0.389163328  | 1     | 1     | 1.59E-16 |
| NINJ1    | 9.06E-21 | 0.93745367   | 0.567 | 0.194 | 1.98E-16 |
| CCND3    | 3.10E-20 | -0.905837819 | 0.242 | 0.717 | 6.77E-16 |
| TNFRSF4  | 9.71E-20 | 0.65721733   | 0.2   | 0.008 | 2.12E-15 |
| SERPINB9 | 2.68E-19 | 0.866823557  | 0.658 | 0.297 | 5.84E-15 |
| HSP90AB1 | 3.66E-19 | 0.866842475  | 0.942 | 0.816 | 7.98E-15 |
| PBX4     | 7.15E-19 | 0.942974927  | 0.642 | 0.301 | 1.56E-14 |
| RPS29    | 1.48E-18 | 0.495935303  | 0.975 | 0.974 | 3.23E-14 |
| GZMA     | 1.62E-18 | -0.61141366  | 0.783 | 0.938 | 3.54E-14 |
| BACH2    | 1.71E-18 | 0.54166161   | 0.25  | 0.024 | 3.74E-14 |
| TNFRSF1B | 3.67E-18 | 0.790350682  | 0.608 | 0.242 | 7.99E-14 |
| FTH1     | 4.63E-18 | 1.007619994  | 0.958 | 0.978 | 1.01E-13 |
| TRAF3IP3 | 2.85E-17 | -0.918384952 | 0.1   | 0.545 | 6.21E-13 |
| GNG2     | 4.07E-17 | 0.731332686  | 0.875 | 0.681 | 8.87E-13 |
| LMNA     | 4.91E-17 | 0.897417075  | 0.333 | 0.066 | 1.07E-12 |
| PTPRCAP  | 6.65E-17 | -0.562915027 | 0.808 | 0.934 | 1.45E-12 |
| GPR171   | 1.38E-16 | 0.913745171  | 0.658 | 0.343 | 3.01E-12 |
| HLA-A    | 1.40E-16 | 0.384584235  | 1     | 0.988 | 3.05E-12 |
| SNX9     | 3.82E-16 | 0.808172343  | 0.442 | 0.136 | 8.33E-12 |
| EML4     | 4.12E-16 | 0.735598072  | 0.775 | 0.523 | 8.98E-12 |
| PPP1CB   | 5.44E-16 | 0.764442763  | 0.508 | 0.184 | 1.19E-11 |
| KLRG1    | 6.05E-16 | -0.742954538 | 0.55  | 0.832 | 1.32E-11 |
| HBB      | 7.69E-16 | -1.053581408 | 0.092 | 0.509 | 1.68E-11 |
| SH2D2A   | 1.54E-14 | 0.820663667  | 0.675 | 0.405 | 3.37E-10 |
| PDE4A    | 1.54E-14 | 0.603126028  | 0.217 | 0.028 | 3.07E-10 |
| DENND2D  | 1.85E-14 | -0.851354855 | 0.092 | 0.487 | 4.03E-10 |
| EVL      | 5.23E-14 | -0.66773758  | 0.342 | 0.703 | 1.14E-09 |
| FOXO1    | 6.24E-14 | 0.687213608  | 0.342 | 0.09  | 1.36E-09 |
| SOCS3    | 6.72E-14 | 0.707607932  | 0.508 | 0.2   | 1.47E-09 |
| LITAF    | 7.17E-14 | 0.714816919  | 0.75  | 0.483 | 1.56E-09 |
| ELOVL5   | 1.17E-13 | 0.736090384  | 0.692 | 0.425 | 2.56E-09 |
| SEC14L1  | 1.24E-13 | 0.77739107   | 0.417 | 0.142 | 2.70E-09 |
| CKLF     | 1.49E-13 | -0.676969997 | 0.242 | 0.635 | 3.24E-09 |
| PFKFB3   | 1.72E-13 | 0.718325993  | 0.533 | 0.24  | 3.75E-09 |
| SLC9A3R1 | 2.81E-13 | -0.769756819 | 0.15  | 0.533 | 6.12E-09 |
| HSPH1    | 4.29E-13 | 1.052879728  | 0.45  | 0.182 | 9.36E-09 |
| GZMK     | 9.46E-13 | -0.516259325 | 0.792 | 0.914 | 2.06E-08 |
| SATB1    | 1.14E-12 | 0.766994282  | 0.725 | 0.499 | 2.48E-08 |
| H3F3B    | 1.36E-12 | 0.446057558  | 1     | 0.976 | 2.98E-08 |
| CD52     | 1.63E-12 | -0.601281467 | 0.708 | 0.882 | 3.55E-08 |
| IL7R     | 1.81E-12 | 0.512007118  | 1     | 0.954 | 3.95E-08 |
| MT1E     | 2.31E-12 | 1.81719514   | 0.375 | 0.124 | 5.03E-08 |
| BIRC3    | 2.94E-12 | 0.73905148   | 0.583 | 0.291 | 6.42E-08 |
| PTPN6    | 3.05E-12 | -0.746631119 | 0.083 | 0.445 | 6.64E-08 |
| LCK      | 3.23E-12 | -0.684228177 | 0.325 | 0.669 | 7.03E-08 |
| CPD      | 3.79E-12 | 0.595471315  | 0.325 | 0.092 | 8.27E-08 |
| AREG     | 3.82E-12 | 0.772017453  | 0.475 | 0.184 | 8.33E-08 |
| HCST     | 4.57E-12 | -0.440607161 | 0.858 | 0.956 | 9.96E-08 |
| SH3BGRL3 | 4.82E-12 | -0.475623182 | 0.85  | 0.926 | 1.05E-07 |
| BCL2     | 4.91E-12 | -0.790378004 | 0.058 | 0.389 | 1.07E-07 |
| ACTB     | 7.57E-12 | -0.324973174 | 1     | 0.998 | 1.65E-07 |
| BCL3     | 8.98E-12 | 0.557016628  | 0.275 | 0.066 | 1.96E-07 |
| OTULIN   | 9.10E-12 | 0.487644012  | 0.258 | 0.058 | 1.98E-07 |
| CD3E     | 9.27E-12 | -0.381802532 | 0.908 | 0.972 | 2.02E-07 |
| MTHFD2   | 1.12E-11 | 0.62637811   | 0.392 | 0.14  | 2.43E-07 |
| REL      | 1.39E-11 | 0.800753566  | 0.742 | 0.513 | 3.02E-07 |
| HIVEP2   | 1.44E-11 | 0.607004451  | 0.283 | 0.074 | 3.15E-07 |
| LYST     | 1.82E-11 | 0.634935819  | 0.467 | 0.198 | 3.97E-07 |
| IL21R    | 2.03E-11 | 0.519162849  | 0.25  | 0.056 | 4.42E-07 |
| PDE4D    | 2.30E-11 | 0.691702226  | 0.425 | 0.17  | 5.01E-07 |
| DDX24    | 2.44E-11 | 0.668904002  | 0.683 | 0.435 | 5.32E-07 |
| IRF8     | 2.48E-11 | 0.608549905  | 0.35  | 0.112 | 5.41E-07 |
| ODC1     | 2.66E-11 | 0.628059397  | 0.367 | 0.122 | 5.81E-07 |

|            |          |              |       |       |             |
|------------|----------|--------------|-------|-------|-------------|
| TSC22D4    | 3.01E-11 | -0.672748284 | 0.067 | 0.397 | 6.56E-07    |
| TNIP1      | 3.10E-11 | 0.613869007  | 0.492 | 0.238 | 6.76E-07    |
| ATF3       | 3.59E-11 | 0.808610597  | 0.45  | 0.178 | 7.82E-07    |
| HIF1A      | 4.63E-11 | 0.767042505  | 0.525 | 0.261 | 1.01E-06    |
| PIM2       | 5.12E-11 | 0.738448108  | 0.608 | 0.363 | 1.12E-06    |
| AC092580.4 | 6.69E-11 | 0.747582603  | 0.667 | 0.479 | 1.46E-06    |
| HSP90B1    | 7.59E-11 | 0.678625503  | 0.775 | 0.583 | 1.65E-06    |
| SMAP2      | 7.98E-11 | 0.638094568  | 0.567 | 0.305 | 1.74E-06    |
| RUNX3      | 8.95E-11 | 0.61971066   | 0.567 | 0.309 | 1.95E-06    |
| NAMPT      | 9.03E-11 | 0.838414899  | 0.417 | 0.174 | 1.97E-06    |
| TNFRSF9    | 9.07E-11 | 0.535300282  | 0.192 | 0.034 | 1.98E-06    |
| PPP1R18    | 9.38E-11 | -0.604070093 | 0.2   | 0.555 | 2.05E-06    |
| ZHX2       | 9.53E-11 | 0.6028798    | 0.275 | 0.074 | 2.08E-06    |
| STARD7     | 1.14E-10 | 0.69527827   | 0.467 | 0.224 | 2.48E-06    |
| TBC1D10C   | 1.16E-10 | -0.64486516  | 0.142 | 0.481 | 2.54E-06    |
| PIM3       | 1.20E-10 | 0.598875394  | 0.35  | 0.118 | 2.61E-06    |
| STAT4      | 1.57E-10 | 0.554402768  | 0.733 | 0.523 | 3.43E-06    |
| PSTPIP2    | 1.92E-10 | 0.510190659  | 0.225 | 0.05  | 4.18E-06    |
| GIMAP7     | 2.08E-10 | -0.752285559 | 0.183 | 0.507 | 4.55E-06    |
| DENND3     | 2.09E-10 | 0.478055576  | 0.175 | 0.028 | 4.55E-06    |
| STAT3      | 2.09E-10 | 0.641181309  | 0.567 | 0.323 | 4.56E-06    |
| PIM1       | 2.60E-10 | 0.621237694  | 0.7   | 0.497 | 5.67E-06    |
| CD44       | 3.03E-10 | 0.577823158  | 0.717 | 0.499 | 6.62E-06    |
| IL2RA      | 4.33E-10 | 0.329773359  | 0.133 | 0.014 | 9.45E-06    |
| HOPX       | 4.89E-10 | -0.612796668 | 0.258 | 0.563 | 1.07E-05    |
| ISG20      | 5.23E-10 | 0.572132737  | 0.767 | 0.565 | 1.14E-05    |
| ELL2       | 5.87E-10 | 0.50103021   | 0.292 | 0.09  | 1.28E-05    |
| BAZ1A      | 6.97E-10 | 0.598833524  | 0.533 | 0.291 | 1.52E-05    |
| RNF115     | 1.04E-09 | 0.646153732  | 0.458 | 0.218 | 2.27E-05    |
| GZMB       | 1.09E-09 | 0.53368796   | 0.217 | 0.048 | 2.37E-05    |
| GIMAP1     | 1.54E-09 | -0.66764596  | 0.142 | 0.445 | 3.35E-05    |
| PFN1       | 1.55E-09 | -0.313287697 | 0.975 | 0.99  | 3.37E-05    |
| TRAF1      | 2.10E-09 | 0.681265539  | 0.467 | 0.234 | 4.59E-05    |
| MIR155HG   | 2.15E-09 | 0.692084518  | 0.283 | 0.086 | 4.69E-05    |
| VAV1       | 2.35E-09 | 0.492558086  | 0.325 | 0.114 | 5.13E-05    |
| IFNG       | 2.64E-09 | 0.831916661  | 0.633 | 0.365 | 5.75E-05    |
| PYHIN1     | 2.79E-09 | -0.635486227 | 0.15  | 0.449 | 6.08E-05    |
| GPBP1      | 3.47E-09 | 0.49464916   | 0.775 | 0.563 | 7.56E-05    |
| CCDC6      | 4.13E-09 | 0.481842477  | 0.25  | 0.072 | 9.00E-05    |
| IL4R       | 4.21E-09 | 0.496351548  | 0.208 | 0.05  | 9.18E-05    |
| CCL4L2     | 5.23E-09 | -0.903386481 | 0.725 | 0.81  | 0.000114067 |
| TANK       | 5.61E-09 | 0.622171723  | 0.55  | 0.319 | 0.000122267 |
| SARAF      | 6.09E-09 | 0.347290875  | 0.95  | 0.932 | 0.000132788 |
| GADD45G    | 6.18E-09 | 0.449566822  | 0.208 | 0.05  | 0.000134669 |
| KIAA1551   | 6.26E-09 | -0.636722311 | 0.2   | 0.489 | 0.000136426 |
| PGK1       | 6.95E-09 | 0.617779886  | 0.667 | 0.497 | 0.000151638 |
| JAML       | 7.34E-09 | -0.585867544 | 0.108 | 0.403 | 0.000160073 |
| AC006129.2 | 7.76E-09 | -0.652325905 | 0.133 | 0.423 | 0.000169176 |
| HSPA1A     | 8.92E-09 | 1.197331756  | 0.567 | 0.349 | 0.000194481 |
| CNOT6L     | 9.48E-09 | 0.565274133  | 0.5   | 0.261 | 0.000206695 |
| TAGAP      | 1.09E-08 | -0.48718604  | 0.575 | 0.8   | 0.000238039 |
| GIMAP4     | 1.10E-08 | -0.560264033 | 0.275 | 0.591 | 0.000240268 |
| CHD9       | 1.22E-08 | -0.527834257 | 0.042 | 0.301 | 0.000266595 |
| PDLIM2     | 1.33E-08 | -0.60817372  | 0.1   | 0.371 | 0.000290252 |
| FYN        | 1.33E-08 | 0.455788297  | 0.783 | 0.697 | 0.000290975 |
| MAP3K8     | 1.37E-08 | 0.529698562  | 0.683 | 0.459 | 0.000299076 |
| TRABD2A    | 1.38E-08 | 0.509308475  | 0.192 | 0.044 | 0.000300693 |
| GPCPD1     | 1.70E-08 | 0.541611064  | 0.375 | 0.162 | 0.00037103  |
| SDCBP      | 1.86E-08 | 0.534314341  | 0.583 | 0.343 | 0.000405658 |
| ATP1B3     | 2.49E-08 | 0.623095277  | 0.325 | 0.136 | 0.000543345 |
| KDM6B      | 2.65E-08 | 0.533051231  | 0.508 | 0.293 | 0.000577406 |
| CAST       | 2.71E-08 | 0.573693019  | 0.617 | 0.405 | 0.00059018  |
| ARHGAP31   | 2.83E-08 | 0.340747998  | 0.158 | 0.03  | 0.000617414 |
| LGALS1     | 3.18E-08 | 0.76814888   | 0.35  | 0.156 | 0.000694027 |
| ZC3H7A     | 3.32E-08 | 0.484170928  | 0.275 | 0.094 | 0.000723095 |
| C19orf60   | 3.56E-08 | -0.593271349 | 0.133 | 0.411 | 0.000775974 |
| SH3BP1     | 4.01E-08 | -0.519420792 | 0.058 | 0.303 | 0.000874388 |
| GTF3C1     | 4.42E-08 | 0.575848335  | 0.433 | 0.22  | 0.000963672 |
| SBNO2      | 6.41E-08 | 0.337926726  | 0.133 | 0.022 | 0.00139862  |
| METRNL     | 6.80E-08 | 0.316966945  | 0.117 | 0.016 | 0.001482539 |

|              |          |              |       |       |             |
|--------------|----------|--------------|-------|-------|-------------|
| TRAF4        | 6.81E-08 | 0.37900798   | 0.192 | 0.048 | 0.001486019 |
| CCL4         | 6.99E-08 | -0.58948312  | 0.95  | 0.976 | 0.001524256 |
| PPP1CA       | 7.44E-08 | -0.507710711 | 0.308 | 0.571 | 0.001622066 |
| ITGB2        | 8.52E-08 | -0.550119133 | 0.433 | 0.663 | 0.001858584 |
| RORA         | 8.81E-08 | 0.478023726  | 0.8   | 0.621 | 0.001921342 |
| LY9          | 9.24E-08 | -0.477342349 | 0.075 | 0.325 | 0.002015671 |
| RANGAP1      | 9.69E-08 | 0.463432893  | 0.175 | 0.042 | 0.002112526 |
| OBFC1        | 1.14E-07 | -0.542159515 | 0.058 | 0.299 | 0.002489152 |
| EZR          | 1.26E-07 | 0.528750588  | 0.675 | 0.479 | 0.002758562 |
| PHLDB2       | 1.41E-07 | 0.303201309  | 0.108 | 0.014 | 0.003065033 |
| SYNRG        | 1.41E-07 | -0.528826606 | 0.142 | 0.407 | 0.003081174 |
| ANKRD28      | 1.49E-07 | 0.551322962  | 0.408 | 0.196 | 0.003257117 |
| LCP2         | 1.56E-07 | -0.512245391 | 0.317 | 0.593 | 0.003394547 |
| TMIGD2       | 1.68E-07 | -0.521588731 | 0.183 | 0.465 | 0.00366613  |
| THBS1        | 1.83E-07 | 0.35958617   | 0.133 | 0.024 | 0.00398907  |
| DDX21        | 2.12E-07 | 0.617916063  | 0.55  | 0.367 | 0.00462603  |
| ARRB2        | 2.22E-07 | -0.531701287 | 0.125 | 0.373 | 0.004850703 |
| ACAP1        | 2.24E-07 | -0.528653216 | 0.325 | 0.601 | 0.004875057 |
| SPPL2A       | 2.44E-07 | 0.46130434   | 0.375 | 0.168 | 0.0053189   |
| SURF4        | 2.50E-07 | 0.489316259  | 0.517 | 0.301 | 0.005452937 |
| TSC22D3      | 2.61E-07 | 0.363007118  | 0.942 | 0.9   | 0.005687609 |
| BHLHE40      | 2.75E-07 | 0.438346154  | 0.617 | 0.391 | 0.005991192 |
| CLIC1        | 2.75E-07 | -0.358585725 | 0.733 | 0.88  | 0.006000499 |
| CAMK4        | 2.87E-07 | 0.476593247  | 0.642 | 0.435 | 0.006252098 |
| SAMHD1       | 2.91E-07 | -0.542015247 | 0.092 | 0.331 | 0.006355981 |
| NFATC2       | 2.96E-07 | 0.503920924  | 0.433 | 0.23  | 0.006457733 |
| TMC8         | 2.97E-07 | -0.577388748 | 0.15  | 0.391 | 0.006477451 |
| PRMT2        | 3.17E-07 | -0.515458081 | 0.217 | 0.491 | 0.006910204 |
| PPP1R16B     | 3.17E-07 | 0.437541559  | 0.258 | 0.092 | 0.006914821 |
| CD244        | 3.19E-07 | -0.555906351 | 0.017 | 0.216 | 0.006946897 |
| ATRX         | 3.27E-07 | -0.521051321 | 0.192 | 0.449 | 0.007135604 |
| EIF5A        | 3.30E-07 | 0.477220694  | 0.642 | 0.461 | 0.00720674  |
| EMD          | 3.56E-07 | 0.475248765  | 0.5   | 0.297 | 0.007763872 |
| EPAS1        | 4.24E-07 | 0.335492575  | 0.133 | 0.026 | 0.009240939 |
| CD3G         | 4.49E-07 | -0.493499574 | 0.417 | 0.655 | 0.009786183 |
| CDKN1B       | 4.52E-07 | -0.594837738 | 0.183 | 0.431 | 0.00984777  |
| ODF3B        | 4.63E-07 | 0.386643407  | 0.133 | 0.026 | 0.01010515  |
| CAPZB        | 4.65E-07 | -0.419187462 | 0.367 | 0.651 | 0.010136027 |
| IER2         | 4.74E-07 | -0.470252442 | 0.892 | 0.938 | 0.010330723 |
| TRAF3        | 4.89E-07 | 0.388846856  | 0.167 | 0.042 | 0.010659284 |
| DHRS3        | 4.90E-07 | 0.435153254  | 0.308 | 0.132 | 0.01068515  |
| ACAA2        | 5.13E-07 | -0.426668192 | 0.067 | 0.305 | 0.011197513 |
| RCSD1        | 5.22E-07 | -0.520590302 | 0.117 | 0.361 | 0.011394172 |
| STARD10      | 5.58E-07 | 0.318278852  | 0.133 | 0.026 | 0.012171095 |
| SQSTM1       | 6.18E-07 | 0.457544742  | 0.842 | 0.689 | 0.013484317 |
| ADNP2        | 6.20E-07 | 0.326125751  | 0.117 | 0.02  | 0.013529394 |
| TNFAIP3      | 6.51E-07 | 0.399118531  | 0.883 | 0.762 | 0.014192336 |
| RNF19A       | 6.52E-07 | 0.521856445  | 0.5   | 0.309 | 0.0142149   |
| DENND4A      | 6.73E-07 | 0.520644472  | 0.383 | 0.194 | 0.014671586 |
| BTN2A2       | 6.95E-07 | 0.290394395  | 0.125 | 0.024 | 0.015163815 |
| ALB          | 7.45E-07 | 0.399692624  | 0.192 | 0.056 | 0.01624428  |
| JUNB         | 8.35E-07 | -0.35189677  | 0.933 | 0.972 | 0.018210315 |
| HSPA8        | 8.59E-07 | 0.667469513  | 0.925 | 0.904 | 0.018737369 |
| DUSP2        | 8.78E-07 | -0.376523877 | 0.933 | 0.93  | 0.019146103 |
| RBBP8        | 8.98E-07 | 0.330932766  | 0.133 | 0.028 | 0.019573403 |
| BIN2         | 9.25E-07 | -0.506001902 | 0.267 | 0.509 | 0.020182879 |
| JOSD1        | 1.04E-06 | 0.400577703  | 0.217 | 0.072 | 0.022644001 |
| PABPC1       | 1.09E-06 | 0.343965685  | 0.925 | 0.932 | 0.023817823 |
| PEL1         | 1.23E-06 | 0.360768007  | 0.158 | 0.04  | 0.026854403 |
| JUN          | 1.32E-06 | -0.482399394 | 0.767 | 0.922 | 0.028869574 |
| CYB5A        | 1.44E-06 | 0.509803614  | 0.3   | 0.136 | 0.031458579 |
| IL16         | 1.47E-06 | -0.447688236 | 0.125 | 0.361 | 0.032075825 |
| POLR3E       | 1.47E-06 | 0.425252058  | 0.192 | 0.06  | 0.032095357 |
| NR3C1        | 1.47E-06 | 0.465736435  | 0.508 | 0.311 | 0.032101597 |
| CTD-3252C9.4 | 1.52E-06 | 0.548056757  | 0.367 | 0.182 | 0.033224319 |
| GRAP2        | 1.62E-06 | -0.491997639 | 0.033 | 0.222 | 0.035414161 |
| BTG2         | 1.69E-06 | -0.552210464 | 0.533 | 0.733 | 0.036945896 |
| CCDC85B      | 1.86E-06 | -0.417673438 | 0.225 | 0.479 | 0.0405769   |
| CISH         | 2.04E-06 | -0.464114007 | 0.033 | 0.224 | 0.04456259  |
| SLAMF6       | 2.14E-06 | -0.455105576 | 0.042 | 0.236 | 0.046669341 |



|       |          |              |       |       |             |
|-------|----------|--------------|-------|-------|-------------|
| LPIN1 | 2.15E-06 | 0.529575565  | 0.383 | 0.2   | 0.046876348 |
| CDK6  | 2.15E-06 | -0.472559599 | 0.108 | 0.345 | 0.046974819 |
| CENPM | 2.25E-06 | 0.275502983  | 0.125 | 0.026 | 0.049058206 |
| NCR3  | 2.26E-06 | -0.451205167 | 0.475 | 0.695 | 0.049388079 |
| RGS19 | 2.28E-06 | -0.429347942 | 0.075 | 0.291 | 0.049714563 |

List of differentially expressed genes of IL7R CD4 T in overall stage (PR versus PP)

| gene     | p_val    | avg_logFC    | pct.1 | pct.2 | p_val_adj   |
|----------|----------|--------------|-------|-------|-------------|
| RPS29    | 1.52E-24 | 0.556979753  | 0.994 | 0.974 | 3.30E-20    |
| DEFA3    | 4.36E-23 | -1.001018821 | 0.051 | 0.554 | 9.50E-19    |
| MYL12A   | 7.77E-22 | -0.741343487 | 0.756 | 0.961 | 1.70E-17    |
| FAM177A1 | 1.33E-21 | 1.307093474  | 0.596 | 0.167 | 2.91E-17    |
| HSPE1    | 7.88E-21 | 1.624640777  | 0.75  | 0.412 | 1.72E-16    |
| HSPD1    | 1.35E-20 | 1.8221006    | 0.737 | 0.425 | 2.94E-16    |
| S100A4   | 2.40E-19 | -0.743160228 | 0.731 | 0.97  | 5.23E-15    |
| ACTB     | 2.31E-17 | -0.515506892 | 0.994 | 1     | 5.04E-13    |
| HBB      | 2.51E-17 | -1.351868715 | 0.096 | 0.528 | 5.47E-13    |
| HSP90AA1 | 5.00E-17 | 1.697238944  | 0.859 | 0.785 | 1.09E-12    |
| BATF     | 7.11E-16 | 0.847446294  | 0.679 | 0.305 | 1.55E-11    |
| HSPH1    | 1.07E-15 | 1.577276677  | 0.551 | 0.215 | 2.33E-11    |
| SRGN     | 1.15E-15 | 0.638340744  | 0.981 | 0.957 | 2.52E-11    |
| RPS27    | 3.24E-14 | 0.281796867  | 1     | 1     | 7.07E-10    |
| CCND3    | 5.00E-14 | -0.613219986 | 0.34  | 0.768 | 1.09E-09    |
| TRAF3IP3 | 5.37E-14 | -0.832860777 | 0.103 | 0.455 | 1.17E-09    |
| AIM1     | 7.05E-14 | 0.911845994  | 0.628 | 0.335 | 1.54E-09    |
| HSPB1    | 7.79E-14 | 1.262886726  | 0.647 | 0.369 | 1.70E-09    |
| PFN1     | 1.68E-13 | -0.5148979   | 0.904 | 0.94  | 3.67E-09    |
| MTHFD2   | 5.79E-13 | 0.838128558  | 0.5   | 0.185 | 1.26E-08    |
| HSP90AB1 | 7.65E-13 | 0.999257277  | 0.853 | 0.815 | 1.67E-08    |
| FTH1     | 9.20E-13 | 0.698154656  | 1     | 0.987 | 2.01E-08    |
| SOD2     | 4.74E-12 | 1.043264846  | 0.462 | 0.167 | 1.03E-07    |
| CD52     | 6.57E-12 | -0.558459913 | 0.66  | 0.88  | 1.43E-07    |
| CREM     | 1.24E-11 | 0.805921847  | 0.622 | 0.33  | 2.70E-07    |
| LDHA     | 3.55E-11 | 0.63736976   | 0.782 | 0.588 | 7.74E-07    |
| CORO1A   | 4.86E-11 | -0.549362314 | 0.545 | 0.803 | 1.06E-06    |
| LCK      | 7.16E-11 | -0.616837629 | 0.282 | 0.631 | 1.56E-06    |
| CNOT6L   | 8.79E-11 | 0.74568909   | 0.481 | 0.21  | 1.92E-06    |
| RPL36A   | 4.43E-10 | 0.435524457  | 0.897 | 0.854 | 9.65E-06    |
| NOP58    | 6.68E-10 | 0.698013768  | 0.513 | 0.245 | 1.46E-05    |
| SOD1     | 2.55E-09 | 0.702413187  | 0.686 | 0.536 | 5.56E-05    |
| DRAP1    | 3.00E-09 | -0.637856801 | 0.122 | 0.395 | 6.54E-05    |
| TSC22D4  | 3.05E-09 | -0.583622685 | 0.077 | 0.343 | 6.65E-05    |
| STAT3    | 4.39E-09 | 0.630391092  | 0.532 | 0.27  | 9.57E-05    |
| PTPN6    | 5.11E-09 | -0.597037808 | 0.077 | 0.335 | 0.000111495 |
| MT-ND3   | 5.16E-09 | 0.430965199  | 0.987 | 1     | 0.000112517 |
| MT2A     | 8.74E-09 | 2.536929877  | 0.628 | 0.425 | 0.000190504 |
| SLC9A3R1 | 1.24E-08 | -0.534246668 | 0.167 | 0.455 | 0.000270945 |
| HSPA1A   | 1.33E-08 | 1.144135147  | 0.66  | 0.429 | 0.000290898 |
| BIRC3    | 1.77E-08 | 0.835732366  | 0.474 | 0.227 | 0.000386467 |
| FERMT3   | 2.03E-08 | -0.44550467  | 0.071 | 0.305 | 0.000442249 |
| PPP1R16B | 3.57E-08 | 0.505298997  | 0.186 | 0.026 | 0.000778559 |
| RELB     | 5.32E-08 | 0.646818247  | 0.301 | 0.094 | 0.001160128 |
| SKAP1    | 6.05E-08 | -0.52829682  | 0.218 | 0.494 | 0.001318613 |
| SLC7A5   | 7.57E-08 | 0.67589527   | 0.314 | 0.107 | 0.001649919 |
| PPP1R18  | 7.69E-08 | -0.542822097 | 0.186 | 0.451 | 0.001677928 |
| SELL     | 1.14E-07 | 1.01919581   | 0.314 | 0.112 | 0.002492119 |
| RPS19BP1 | 1.31E-07 | -0.460223103 | 0.109 | 0.352 | 0.002850894 |
| HLA-B    | 1.60E-07 | 0.282726781  | 0.994 | 0.987 | 0.003488812 |
| CFL1     | 1.64E-07 | -0.311353787 | 0.808 | 0.944 | 0.003579695 |
| AQP3     | 1.78E-07 | -0.513086317 | 0.167 | 0.425 | 0.003889408 |
| ARID5A   | 1.97E-07 | 0.629422954  | 0.397 | 0.185 | 0.004299492 |
| LMNA     | 2.66E-07 | 0.79119022   | 0.397 | 0.176 | 0.005792176 |
| BAZ1A    | 3.36E-07 | 0.662388582  | 0.442 | 0.236 | 0.007337442 |
| TBC1D10C | 3.43E-07 | -0.532880153 | 0.128 | 0.356 | 0.007471988 |
| MT-ND5   | 3.84E-07 | -0.323721705 | 0.917 | 0.983 | 0.008376805 |
| HBA2     | 5.01E-07 | -0.634928076 | 0.006 | 0.163 | 0.01092333  |
| KIAA1551 | 5.51E-07 | -0.581266831 | 0.244 | 0.506 | 0.012022523 |

|        |          |              |       |       |             |
|--------|----------|--------------|-------|-------|-------------|
| NFKB2  | 6.26E-07 | 0.475831554  | 0.231 | 0.06  | 0.013649773 |
| RASSF7 | 6.76E-07 | -0.473891246 | 0.032 | 0.206 | 0.014732614 |
| CD74   | 6.94E-07 | 0.687799864  | 0.667 | 0.481 | 0.015137282 |
| LBH    | 7.29E-07 | -0.45403096  | 0.321 | 0.601 | 0.015898803 |
| FKBP4  | 7.68E-07 | 0.7086907    | 0.288 | 0.112 | 0.016745845 |
| PELI1  | 8.14E-07 | 0.631854878  | 0.25  | 0.082 | 0.017743291 |
| CLIC1  | 8.24E-07 | -0.42175961  | 0.558 | 0.79  | 0.017976907 |
| ACAP1  | 8.52E-07 | -0.455624146 | 0.327 | 0.588 | 0.01858159  |
| ITK    | 9.43E-07 | 0.604964962  | 0.551 | 0.348 | 0.020561554 |
| BCL3   | 1.05E-06 | 0.455642434  | 0.231 | 0.064 | 0.022840282 |
| LY9    | 1.21E-06 | -0.42668225  | 0.045 | 0.227 | 0.026453379 |
| CFH    | 1.28E-06 | -0.470878365 | 0.038 | 0.215 | 0.027877562 |
| RNF19A | 1.29E-06 | 0.670436872  | 0.385 | 0.193 | 0.028145769 |
| CSK    | 1.31E-06 | -0.399290231 | 0.064 | 0.266 | 0.028672905 |
| PA2G4  | 1.44E-06 | -0.433253828 | 0.173 | 0.416 | 0.031434314 |
| PRDM1  | 1.45E-06 | 0.614978413  | 0.551 | 0.365 | 0.031620146 |
| RAC2   | 1.58E-06 | -0.401358619 | 0.615 | 0.807 | 0.034518018 |
| ITGA4  | 1.68E-06 | -0.536484557 | 0.115 | 0.326 | 0.036566382 |
| REEP5  | 1.88E-06 | -0.477254912 | 0.154 | 0.386 | 0.04102491  |
| SOCS3  | 1.97E-06 | 0.609848661  | 0.397 | 0.206 | 0.043030079 |
| PPIA   | 2.06E-06 | -0.276070613 | 0.891 | 0.974 | 0.044899266 |

List of differentially expressed genes of PTGDS NK in overall stage (PR versus PP)

| gene     | p val    | avg logFC    | pct.1 | pct.2 | p val adj   |
|----------|----------|--------------|-------|-------|-------------|
| MYOM2    | 4.79E-24 | -1.355786341 | 0.112 | 0.672 | 1.04E-19    |
| DEFA3    | 4.24E-23 | -1.384386246 | 0.034 | 0.541 | 9.24E-19    |
| CD3E     | 4.26E-21 | -1.509850098 | 0.028 | 0.484 | 9.28E-17    |
| ACTB     | 1.02E-18 | -0.569476746 | 1     | 1     | 2.22E-14    |
| RPS29    | 5.65E-18 | 0.688678538  | 0.983 | 0.91  | 1.23E-13    |
| NFKBIA   | 2.08E-17 | 0.75902464   | 0.978 | 0.861 | 4.53E-13    |
| LAIR2    | 3.67E-17 | 1.458203139  | 0.603 | 0.131 | 8.00E-13    |
| B2M      | 3.75E-17 | 0.361496712  | 1     | 1     | 8.17E-13    |
| GNLY     | 1.05E-16 | -0.844731346 | 0.536 | 0.951 | 2.30E-12    |
| HLA-B    | 3.95E-16 | 0.386701843  | 1     | 1     | 8.62E-12    |
| LCK      | 5.20E-16 | -0.909483581 | 0.151 | 0.607 | 1.13E-11    |
| CST7     | 6.37E-16 | 0.641902426  | 1     | 0.959 | 1.39E-11    |
| HBB      | 1.04E-15 | -0.98332495  | 0.061 | 0.467 | 2.27E-11    |
| GZMB     | 1.24E-12 | 0.63156238   | 0.972 | 0.975 | 2.69E-08    |
| PRDM1    | 2.06E-12 | 0.882080672  | 0.715 | 0.434 | 4.50E-08    |
| CORO1A   | 2.51E-12 | -0.621554786 | 0.536 | 0.885 | 5.46E-08    |
| PFN1     | 2.52E-12 | -0.389708812 | 0.972 | 0.992 | 5.50E-08    |
| SRGN     | 5.24E-12 | 0.477464808  | 0.989 | 1     | 1.14E-07    |
| S100A4   | 6.68E-12 | -0.661859838 | 0.743 | 0.959 | 1.46E-07    |
| ANXA6    | 1.71E-11 | -0.69604325  | 0.179 | 0.582 | 3.73E-07    |
| HCST     | 2.09E-11 | -0.54876317  | 0.788 | 0.951 | 4.56E-07    |
| MT-ND3   | 2.46E-11 | 0.452744208  | 0.983 | 0.992 | 5.36E-07    |
| RPS19    | 2.76E-11 | -0.489657988 | 0.994 | 1     | 6.02E-07    |
| LAT      | 8.97E-11 | -0.682080026 | 0.067 | 0.377 | 1.96E-06    |
| HIF1A    | 1.06E-10 | 1.003043222  | 0.531 | 0.221 | 2.31E-06    |
| TNFAIP8  | 1.11E-10 | -0.636761295 | 0.039 | 0.32  | 2.41E-06    |
| H3F3B    | 4.81E-10 | 0.407361994  | 0.994 | 0.992 | 1.05E-05    |
| CCL4     | 1.83E-09 | 0.605482301  | 0.978 | 1     | 3.99E-05    |
| BIN1     | 2.15E-09 | -0.647287769 | 0.101 | 0.41  | 4.69E-05    |
| NEAT1    | 2.30E-09 | 0.602814993  | 0.849 | 0.689 | 5.02E-05    |
| HLA-DQB1 | 6.91E-09 | -0.501861064 | 0.067 | 0.336 | 0.000150677 |
| CALM1    | 7.08E-09 | -0.420293951 | 0.788 | 0.992 | 0.000154374 |
| RPS8     | 1.01E-08 | -0.310153672 | 0.983 | 1     | 0.000219704 |
| RGS19    | 1.96E-08 | -0.584638235 | 0.084 | 0.361 | 0.000428155 |
| SLC9A3R1 | 2.11E-08 | -0.600921691 | 0.307 | 0.664 | 0.00046047  |
| IGKV2-24 | 3.13E-08 | -0.745530624 | 0.022 | 0.221 | 0.000683294 |
| NACA     | 4.69E-08 | -0.377430398 | 0.866 | 0.967 | 0.001023491 |
| SH3BP1   | 4.86E-08 | -0.602162487 | 0.106 | 0.385 | 0.001059167 |
| HRASLS2  | 5.85E-08 | -0.606876417 | 0.05  | 0.279 | 0.001275419 |
| GBP2     | 6.19E-08 | 0.786426727  | 0.514 | 0.295 | 0.001350658 |
| CD69     | 7.14E-08 | 0.716002354  | 0.939 | 0.893 | 0.00155777  |
| SYTL3    | 8.21E-08 | 0.715130772  | 0.715 | 0.566 | 0.001791403 |
| TNFAIP3  | 8.53E-08 | 0.695807644  | 0.777 | 0.615 | 0.001861236 |

|          |          |              |       |       |             |
|----------|----------|--------------|-------|-------|-------------|
| SRSF2    | 8.66E-08 | 0.634619194  | 0.67  | 0.467 | 0.00188916  |
| MALAT1   | 1.07E-07 | 0.330549152  | 1     | 0.992 | 0.00233874  |
| KIR3DL2  | 1.10E-07 | 0.878467805  | 0.447 | 0.18  | 0.00238829  |
| TC2N     | 1.11E-07 | -0.54612214  | 0.045 | 0.262 | 0.002416523 |
| CD99     | 1.16E-07 | -0.387359271 | 0.709 | 0.943 | 0.002531018 |
| HLA-DRB1 | 1.50E-07 | -0.444190224 | 0.156 | 0.467 | 0.003267071 |
| ISG20    | 1.64E-07 | 0.552724953  | 0.777 | 0.598 | 0.003583229 |
| FCER1G   | 2.25E-07 | -0.43977654  | 0.771 | 0.885 | 0.004907017 |
| CXCR4    | 2.30E-07 | -0.514938579 | 0.62  | 0.861 | 0.005025484 |
| RGS2     | 2.70E-07 | -0.625662036 | 0.056 | 0.27  | 0.005898091 |
| ZYX      | 2.86E-07 | -0.553314451 | 0.168 | 0.467 | 0.006233135 |
| ZMYM6NB  | 3.01E-07 | -0.526545482 | 0.05  | 0.262 | 0.006555774 |
| SH2D1A   | 3.73E-07 | -0.536151092 | 0.151 | 0.434 | 0.008144837 |
| RPL24    | 3.84E-07 | -0.327863816 | 0.866 | 0.967 | 0.008378823 |
| RPL7     | 4.63E-07 | -0.374932019 | 0.676 | 0.893 | 0.010100193 |
| IL2RB    | 4.78E-07 | -0.499599734 | 0.285 | 0.639 | 0.010418564 |
| LSP1     | 5.50E-07 | -0.387260404 | 0.503 | 0.869 | 0.011993761 |
| EIF3G    | 5.96E-07 | -0.571389776 | 0.464 | 0.738 | 0.01299867  |
| RCBTB2   | 6.30E-07 | -0.427085364 | 0.017 | 0.18  | 0.01374639  |
| C12orf75 | 6.58E-07 | -0.468036104 | 0.212 | 0.549 | 0.01434571  |
| FAM65B   | 6.75E-07 | -0.552824815 | 0.156 | 0.426 | 0.014726923 |
| HLA-E    | 7.15E-07 | 0.314275024  | 0.961 | 0.992 | 0.015590948 |
| CAP1     | 1.06E-06 | -0.443663454 | 0.346 | 0.68  | 0.023137424 |
| RNF115   | 1.17E-06 | 0.771820069  | 0.397 | 0.18  | 0.02552955  |
| PPP2R2B  | 1.17E-06 | -0.488965538 | 0.045 | 0.238 | 0.02557866  |
| MRPL51   | 1.19E-06 | -0.448493788 | 0.095 | 0.336 | 0.025883629 |
| GADD45B  | 1.34E-06 | 0.569403949  | 0.888 | 0.918 | 0.029257776 |
| TBC1D10C | 1.41E-06 | -0.353190588 | 0.218 | 0.549 | 0.030704055 |
| CCDC85B  | 1.41E-06 | -0.439424589 | 0.229 | 0.549 | 0.030777359 |
| RPL7A    | 1.44E-06 | -0.260033291 | 0.961 | 0.992 | 0.031464072 |
| BATF     | 1.50E-06 | 0.812736459  | 0.436 | 0.221 | 0.032764251 |
| C1orf162 | 1.88E-06 | -0.507513196 | 0.19  | 0.475 | 0.041079037 |
| NCR3     | 1.92E-06 | -0.537674766 | 0.223 | 0.516 | 0.041762439 |
| C11orf73 | 1.94E-06 | -0.44198709  | 0.056 | 0.254 | 0.042227743 |

List of differentially expressed genes of TRBV9 CD8 Teff in overall stage (PR versus PP)

| gene        | p val    | avg logFC    | pct.1 | pct.2 | p val adj   |
|-------------|----------|--------------|-------|-------|-------------|
| RPS29       | 4.79E-22 | 0.68428191   | 0.983 | 0.949 | 1.05E-17    |
| DEFA3       | 2.28E-19 | -1.270826667 | 0.033 | 0.574 | 4.97E-15    |
| TRBV13      | 3.12E-18 | 2.180406841  | 0.45  | 0     | 6.80E-14    |
| MT-ND3      | 2.82E-16 | 0.728094786  | 1     | 0.985 | 6.15E-12    |
| TRAV38-2DV8 | 2.30E-15 | -1.501787488 | 0.075 | 0.537 | 5.03E-11    |
| S100A4      | 3.34E-15 | -0.647077464 | 0.925 | 0.985 | 7.28E-11    |
| HBB         | 1.59E-14 | -1.09829183  | 0.108 | 0.574 | 3.46E-10    |
| TRBV9       | 5.81E-14 | -1.452391531 | 0.142 | 0.574 | 1.27E-09    |
| HLA-B       | 5.13E-13 | 0.363688041  | 1     | 1     | 1.12E-08    |
| CD52        | 6.84E-13 | -0.669349715 | 0.658 | 0.926 | 1.49E-08    |
| SYTL3       | 7.33E-13 | 0.909959061  | 0.75  | 0.471 | 1.60E-08    |
| CD3E        | 2.57E-12 | -0.537129068 | 0.833 | 0.963 | 5.62E-08    |
| RPS27       | 4.36E-12 | 0.290621713  | 1     | 0.993 | 9.52E-08    |
| TRAV17      | 7.15E-11 | 1.173506145  | 0.275 | 0     | 1.56E-06    |
| CNN2        | 1.80E-10 | -0.734637862 | 0.217 | 0.647 | 3.93E-06    |
| NEAT1       | 1.97E-10 | 0.820395605  | 0.783 | 0.544 | 4.30E-06    |
| GZMB        | 4.15E-10 | 0.762089835  | 0.967 | 0.838 | 9.06E-06    |
| VIM         | 1.00E-09 | -0.592702826 | 0.658 | 0.904 | 2.19E-05    |
| ISG20       | 2.08E-09 | 0.67247969   | 0.775 | 0.566 | 4.53E-05    |
| TMSB4X      | 2.24E-09 | -0.258905126 | 1     | 1     | 4.89E-05    |
| DUSP2       | 7.54E-09 | -0.654234574 | 0.725 | 0.919 | 0.000164501 |
| SH2D2A      | 8.69E-09 | 0.782668465  | 0.508 | 0.199 | 0.000189512 |
| PRDM1       | 1.28E-08 | 0.918105594  | 0.592 | 0.324 | 0.000278805 |
| NFKBIA      | 1.31E-08 | 0.590678413  | 0.883 | 0.596 | 0.000286485 |
| HOPX        | 1.79E-08 | -0.652276116 | 0.35  | 0.662 | 0.000389521 |
| CD160       | 1.96E-08 | -0.644262136 | 0.008 | 0.25  | 0.000428248 |
| KLRB1       | 7.20E-08 | 0.841438165  | 0.592 | 0.257 | 0.001570834 |
| CTSW        | 1.77E-07 | 0.539477651  | 0.867 | 0.743 | 0.003861132 |
| OSTF1       | 2.00E-07 | -0.524380117 | 0.267 | 0.603 | 0.004353187 |
| S100A6      | 2.94E-07 | -0.447286732 | 0.742 | 0.963 | 0.00641311  |

|         |          |              |       |       |             |
|---------|----------|--------------|-------|-------|-------------|
| CORO1A  | 3.38E-07 | -0.472183146 | 0.675 | 0.868 | 0.007370483 |
| TOB1    | 1.55E-06 | -0.612445708 | 0.092 | 0.346 | 0.033877723 |
| PTPRCAP | 2.07E-06 | -0.361027348 | 0.842 | 0.971 | 0.04518204  |

List of differentially expressed genes of STMN1 NK-cycling in overall stage (PR versus PP)

| gene     | p val    | avg logFC    | pct.1 | pct.2 | p val adj   |
|----------|----------|--------------|-------|-------|-------------|
| NFKB2    | 6.54E-11 | 0.900508962  | 0.692 | 0.139 | 1.43E-06    |
| RELB     | 1.11E-10 | 1.165243379  | 0.692 | 0.156 | 2.42E-06    |
| HSPD1    | 1.85E-10 | 1.77147971   | 0.923 | 0.475 | 4.03E-06    |
| HSP90AB1 | 4.31E-10 | 1.43383896   | 1     | 0.639 | 9.39E-06    |
| HSP90AA1 | 5.12E-10 | 1.232263446  | 1     | 0.984 | 1.12E-05    |
| PTPRCAP  | 4.84E-09 | -0.860364569 | 0.885 | 0.984 | 0.00010546  |
| HSPE1    | 8.64E-09 | 1.654427594  | 0.885 | 0.615 | 0.000188356 |
| FKBP4    | 3.87E-08 | 0.898351381  | 0.538 | 0.098 | 0.000843723 |
| LMNA     | 8.17E-08 | 0.772231303  | 0.462 | 0.066 | 0.001780662 |
| SRGN     | 8.38E-08 | 0.651059025  | 1     | 0.992 | 0.001826843 |
| SYTL3    | 8.53E-08 | 0.892174446  | 0.885 | 0.5   | 0.001859221 |
| BCL3     | 1.57E-07 | 0.668454517  | 0.462 | 0.074 | 0.003419253 |
| SQSTM1   | 1.62E-07 | 0.931549761  | 0.962 | 0.713 | 0.003542064 |
| BATF     | 2.39E-07 | 0.925114834  | 0.808 | 0.369 | 0.00521488  |
| HSPH1    | 2.80E-07 | 2.207696395  | 0.692 | 0.311 | 0.006116694 |
| CORO1A   | 5.85E-07 | -0.650329923 | 0.885 | 0.984 | 0.012757564 |
| MYL12A   | 9.57E-07 | -0.65924265  | 0.962 | 1     | 0.020870756 |
| CD72     | 9.89E-07 | 0.526777336  | 0.385 | 0.049 | 0.021566206 |
| KIR2DL4  | 1.18E-06 | 0.706082029  | 0.423 | 0.074 | 0.025742752 |
| CBLB     | 1.19E-06 | 0.717224172  | 0.769 | 0.336 | 0.025967567 |
| TNFRSF4  | 1.28E-06 | 0.503912824  | 0.231 | 0.008 | 0.027934818 |

List of differentially expressed genes of XCL2 NK in overall stage (PR versus PP)

| gene     | p val    | avg logFC    | pct.1 | pct.2 | p val adj   |
|----------|----------|--------------|-------|-------|-------------|
| HSP90AA1 | 3.31E-11 | 1.939212301  | 0.966 | 0.8   | 7.23E-07    |
| SH2D2A   | 2.83E-10 | 1.312662137  | 0.724 | 0.2   | 6.17E-06    |
| HSPD1    | 4.95E-10 | 2.202340767  | 0.759 | 0.291 | 1.08E-05    |
| HSPH1    | 8.40E-09 | 1.972242036  | 0.586 | 0.136 | 0.000183272 |
| PFN1     | 1.02E-08 | -0.722329294 | 0.966 | 0.973 | 0.000221687 |
| CREM     | 1.41E-08 | 1.205776613  | 0.828 | 0.318 | 0.000306942 |
| HSPE1    | 2.13E-08 | 1.829115419  | 0.759 | 0.355 | 0.000463717 |
| TNFAIP3  | 4.45E-08 | 1.627858318  | 0.586 | 0.136 | 0.0009706   |
| TNFRSF9  | 9.98E-08 | 1.269306043  | 0.379 | 0.036 | 0.002175432 |
| MYL12A   | 1.55E-07 | -0.777353872 | 0.69  | 0.945 | 0.003380626 |
| NFKBIA   | 7.23E-07 | 1.085989628  | 0.897 | 0.564 | 0.015773513 |
| HSPA1A   | 7.52E-07 | 1.911872521  | 0.724 | 0.4   | 0.01639998  |
| STAT3    | 1.78E-06 | 1.006871949  | 0.655 | 0.282 | 0.038719168 |

List of differentially expressed genes of XCL1 NK in overall stage (PR versus PP)

| gene     | p val    | avg logFC   | pct.1 | pct.2 | p val adj   |
|----------|----------|-------------|-------|-------|-------------|
| NFKB2    | 9.33E-10 | 1.069013128 | 0.52  | 0.034 | 2.03E-05    |
| FAM177A1 | 1.00E-08 | 1.163500715 | 0.88  | 0.402 | 0.000218674 |

List of differentially expressed genes of STMN1 T-cycling in overall stage (PR versus PP)

| gene     | p val    | avg logFC    | pct.1 | pct.2 | p val adj   |
|----------|----------|--------------|-------|-------|-------------|
| HSP90AA1 | 1.19E-10 | 1.868282445  | 1     | 0.982 | 2.60E-06    |
| RELB     | 2.53E-09 | 1.230377656  | 0.778 | 0.246 | 5.51E-05    |
| SRGN     | 4.72E-09 | 0.77154237   | 1     | 0.93  | 0.000102987 |
| UBE2C    | 2.35E-08 | -1.064196191 | 0.694 | 0.93  | 0.000512069 |
| NFKB2    | 2.50E-08 | 1.098389648  | 0.694 | 0.175 | 0.000544447 |
| HSPD1    | 3.49E-08 | 1.803146412  | 0.861 | 0.579 | 0.000761983 |

|          |          |              |       |       |             |
|----------|----------|--------------|-------|-------|-------------|
| FEZ1     | 6.18E-08 | 1.2011413    | 0.639 | 0.158 | 0.001348625 |
| CD7      | 2.17E-07 | 0.934683896  | 0.917 | 0.719 | 0.004724883 |
| CST7     | 2.67E-07 | 0.778646579  | 0.972 | 0.789 | 0.005812949 |
| MT2A     | 3.53E-07 | 1.446208757  | 0.944 | 0.895 | 0.007687614 |
| HLA-A    | 4.19E-07 | 0.484245555  | 1     | 0.947 | 0.009148375 |
| HSP90AB1 | 6.49E-07 | 1.013755736  | 1     | 0.825 | 0.014147395 |
| IL7R     | 9.27E-07 | 0.964529292  | 0.972 | 0.772 | 0.020223979 |
| STAT3    | 9.89E-07 | 0.750314052  | 0.75  | 0.263 | 0.021569618 |
| SLC7A5   | 1.10E-06 | 0.783049428  | 0.861 | 0.404 | 0.024080662 |
| DEFA3    | 1.39E-06 | -1.005818638 | 0.056 | 0.579 | 0.030402621 |

List of differentially expressed genes of TRDV2  $\gamma\delta$  T in overall stage (PR versus PP)

| gene | p val | avg logFC | pct.1 | pct.2 | p val adj |
|------|-------|-----------|-------|-------|-----------|
| NA   |       |           |       |       |           |

**Table 17: List of DEGs of NK/T cell clusters in cold preservation stage (EP versus PP)**

List of differentially expressed genes of CD8B CD8 Tem in cold preservation stage (EP versus PP)

| gene     | p_val    | avg_logFC    | pct.1 | pct.2 | p_val_adj   |
|----------|----------|--------------|-------|-------|-------------|
| MT2A     | 1.79E-26 | 1.519939992  | 0.696 | 0.444 | 3.90E-22    |
| IGLV2-23 | 2.13E-23 | 0.81934981   | 0.21  | 0.01  | 4.64E-19    |
| IGLV2-14 | 4.71E-16 | 0.625417176  | 0.313 | 0.104 | 1.03E-11    |
| IGKV2-30 | 4.93E-15 | 0.638919979  | 0.235 | 0.059 | 1.08E-10    |
| JUN      | 4.58E-14 | 0.417789208  | 0.848 | 0.718 | 1.00E-09    |
| MT1X     | 7.30E-13 | 0.806331113  | 0.443 | 0.26  | 1.59E-08    |
| IGKV2-24 | 2.83E-11 | -0.491907125 | 0.043 | 0.184 | 6.16E-07    |
| MT1E     | 5.15E-11 | 1.046989459  | 0.23  | 0.086 | 1.12E-06    |
| CXCR4    | 5.37E-10 | -0.345994827 | 0.884 | 0.939 | 1.17E-05    |
| SRGN     | 2.24E-08 | -0.252315208 | 0.944 | 0.969 | 0.000489083 |
| HSP90AA1 | 7.61E-08 | 0.323542503  | 0.819 | 0.753 | 0.001659745 |
| CCL4     | 1.69E-07 | -0.47808937  | 0.94  | 0.957 | 0.003688326 |
| IGKV4-1  | 3.59E-07 | 0.450329332  | 0.302 | 0.172 | 0.007830559 |
| CCL4L2   | 3.86E-07 | -0.611460126 | 0.732 | 0.8   | 0.008412857 |
| FUS      | 2.12E-06 | -0.305655656 | 0.57  | 0.714 | 0.046180334 |

List of differentially expressed genes of GNLV NK in cold preservation stage (EP versus PP)

| gene     | p_val    | avg_logFC    | pct.1 | pct.2 | p_val_adj   |
|----------|----------|--------------|-------|-------|-------------|
| MT2A     | 1.79E-26 | 1.519939992  | 0.696 | 0.444 | 3.90E-22    |
| IGLV2-23 | 2.13E-23 | 0.81934981   | 0.21  | 0.01  | 4.64E-19    |
| IGLV2-14 | 4.71E-16 | 0.625417176  | 0.313 | 0.104 | 1.03E-11    |
| IGKV2-30 | 4.93E-15 | 0.638919979  | 0.235 | 0.059 | 1.08E-10    |
| JUN      | 4.58E-14 | 0.417789208  | 0.848 | 0.718 | 1.00E-09    |
| MT1X     | 7.30E-13 | 0.806331113  | 0.443 | 0.26  | 1.59E-08    |
| IGKV2-24 | 2.83E-11 | -0.491907125 | 0.043 | 0.184 | 6.16E-07    |
| MT1E     | 5.15E-11 | 1.046989459  | 0.23  | 0.086 | 1.12E-06    |
| CXCR4    | 5.37E-10 | -0.345994827 | 0.884 | 0.939 | 1.17E-05    |
| SRGN     | 2.24E-08 | -0.252315208 | 0.944 | 0.969 | 0.000489083 |
| HSP90AA1 | 7.61E-08 | 0.323542503  | 0.819 | 0.753 | 0.001659745 |
| CCL4     | 1.69E-07 | -0.47808937  | 0.94  | 0.957 | 0.003688326 |
| IGKV4-1  | 3.59E-07 | 0.450329332  | 0.302 | 0.172 | 0.007830559 |
| CCL4L2   | 3.86E-07 | -0.611460126 | 0.732 | 0.8   | 0.008412857 |
| FUS      | 2.12E-06 | -0.305655656 | 0.57  | 0.714 | 0.046180334 |

List of differentially expressed genes of CCL20 CD8 MAIT in cold preservation stage (EP versus PP)

| gene         | p_val    | avg_logFC    | pct.1 | pct.2 | p_val_adj   |
|--------------|----------|--------------|-------|-------|-------------|
| MT2A         | 4.73E-25 | 1.413204626  | 0.796 | 0.653 | 1.03E-20    |
| IGLV2-23     | 5.04E-21 | 0.581831071  | 0.206 | 0.018 | 1.10E-16    |
| MT1X         | 1.68E-18 | 0.906673469  | 0.516 | 0.291 | 3.66E-14    |
| CCL4         | 1.18E-15 | -0.617762444 | 0.958 | 0.976 | 2.57E-11    |
| MT1E         | 3.07E-15 | 0.96455502   | 0.316 | 0.124 | 6.70E-11    |
| CCL4L2       | 3.57E-15 | -0.807311008 | 0.707 | 0.81  | 7.79E-11    |
| IGKV2-24     | 9.17E-14 | -0.456071671 | 0.048 | 0.21  | 2.00E-09    |
| MT-ATP8      | 9.35E-13 | -0.305787504 | 0.975 | 0.99  | 2.04E-08    |
| IGKV3-15     | 2.84E-12 | 0.446128648  | 0.168 | 0.036 | 6.19E-08    |
| IGLV2-11     | 4.50E-11 | 0.427504044  | 0.175 | 0.044 | 9.82E-07    |
| IGLV2-14     | 1.27E-10 | 0.431086156  | 0.267 | 0.116 | 2.78E-06    |
| PTGER4       | 9.81E-09 | -0.35669941  | 0.499 | 0.655 | 0.000213944 |
| CTD-3252C9.4 | 3.75E-07 | 0.389192823  | 0.307 | 0.182 | 0.008167649 |
| PHLDA1       | 8.45E-07 | -0.370494247 | 0.181 | 0.319 | 0.018430102 |

List of differentially expressed genes of IL7R CD4 T in cold preservation stage (EP versus PP)

| gene     | p_val    | avg_logFC   | pct.1 | pct.2 | p_val_adj   |
|----------|----------|-------------|-------|-------|-------------|
| IGLV2-23 | 2.46E-14 | 0.776266991 | 0.244 | 0.009 | 5.36E-10    |
| MT2A     | 1.01E-09 | 1.690040158 | 0.599 | 0.425 | 2.21E-05    |
| MT1X     | 1.14E-09 | 1.067418789 | 0.393 | 0.163 | 2.48E-05    |
| MT1E     | 5.60E-09 | 1.134897518 | 0.244 | 0.056 | 0.000122104 |

|          |          |             |       |       |             |
|----------|----------|-------------|-------|-------|-------------|
| IGLV2-11 | 1.51E-07 | 0.625309158 | 0.207 | 0.047 | 0.00328824  |
| IGLV2-14 | 2.28E-07 | 0.541589087 | 0.281 | 0.099 | 0.004964001 |
| FOSB     | 8.25E-07 | 0.255242271 | 0.748 | 0.536 | 0.018000527 |

List of differentially expressed genes of PTGDS NK in cold preservation stage (EP versus PP)

| gene    | p val    | avg logFC   | pct.1 | pct.2 | p val adj   |
|---------|----------|-------------|-------|-------|-------------|
| MT-ATP6 | 4.72E-10 | 0.360779687 | 0.993 | 1     | 1.03E-05    |
| DUSP1   | 9.58E-07 | 0.490723835 | 0.936 | 0.861 | 0.020885859 |
| MT2A    | 1.91E-06 | 1.055518805 | 0.794 | 0.721 | 0.041727368 |

List of differentially expressed genes of TRBV9 CD8 Teff in cold preservation stage (EP versus PP)

| gene     | p val    | avg logFC   | pct.1 | pct.2 | p val adj   |
|----------|----------|-------------|-------|-------|-------------|
| MT2A     | 7.94E-12 | 1.614555982 | 0.876 | 0.654 | 1.73E-07    |
| MT-ATP6  | 5.65E-11 | 0.457782371 | 1     | 0.978 | 1.23E-06    |
| FOS      | 9.16E-09 | 0.855600894 | 0.819 | 0.588 | 0.000199737 |
| IGLV2-23 | 1.56E-08 | 0.762055374 | 0.248 | 0.015 | 0.000340647 |
| MT1E     | 7.52E-08 | 1.369606616 | 0.467 | 0.176 | 0.001639611 |

List of differentially expressed genes of STMN1 NK-cycling in cold preservation stage (EP versus PP)

| gene     | p val    | avg logFC   | pct.1 | pct.2 | p val adj   |
|----------|----------|-------------|-------|-------|-------------|
| IGLV2-14 | 1.37E-07 | 0.582528702 | 0.33  | 0.057 | 0.002996482 |
| IGLV2-23 | 1.43E-06 | 0.375927728 | 0.2   | 0.008 | 0.031148678 |

List of differentially expressed genes of XCL2 NK in cold preservation stage (EP versus PP)

| gene     | p val    | avg logFC   | pct.1 | pct.2 | p val adj   |
|----------|----------|-------------|-------|-------|-------------|
| IGLV2-14 | 3.92E-07 | 0.917703789 | 0.356 | 0.073 | 0.008554032 |

List of differentially expressed genes of XCL1 NK in cold preservation stage (EP versus PP)

| gene     | p val    | avg logFC   | pct.1 | pct.2 | p val adj   |
|----------|----------|-------------|-------|-------|-------------|
| IGLV2-23 | 1.60E-06 | 0.673911049 | 0.268 | 0.011 | 0.034893375 |

List of differentially expressed genes of STMN1 T-cycling in cold preservation stage (EP versus PP)

| gene | p val | avg logFC | pct.1 | pct.2 | p val adj |
|------|-------|-----------|-------|-------|-----------|
| NA   |       |           |       |       |           |

List of differentially expressed genes of TRDV2  $\gamma\delta$  T in cold preservation stage (EP versus PP)

| gene | p val | avg logFC | pct.1 | pct.2 | p val adj |
|------|-------|-----------|-------|-------|-----------|
| NA   |       |           |       |       |           |

**Table 18. List of markers information for B/Plasma cell clusters, related to Figure 6.**

|    | p_val     | avg_logFC   | pct.1 | pct.2 | p_val_adj | gene       | cluster | cell_type    |
|----|-----------|-------------|-------|-------|-----------|------------|---------|--------------|
| 1  | 2.02E-178 | 1.903253941 | 0.592 | 0.014 | 4.41E-174 | TCL1A      | 1       | TCLIA_B cell |
| 2  | 4.12E-142 | 1.436694916 | 0.916 | 0.475 | 8.98E-138 | TXNIP      | 1       | TCLIA_B cell |
| 3  | 2.29E-165 | 1.377151425 | 0.995 | 0.856 | 5.00E-161 | BTG1       | 1       | TCLIA_B cell |
| 4  | 3.13E-155 | 1.306186162 | 0.983 | 0.675 | 6.82E-151 | CD37       | 1       | TCLIA_B cell |
| 5  | 3.08E-75  | 1.24399586  | 0.457 | 0.11  | 6.72E-71  | FCER2      | 1       | TCLIA_B cell |
| 6  | 9.32E-138 | 1.239902014 | 0.96  | 0.766 | 2.03E-133 | CXCR4      | 1       | TCLIA_B cell |
| 7  | 1.04E-88  | 1.233283308 | 0.358 | 0.022 | 2.26E-84  | IL4R       | 1       | TCLIA_B cell |
| 8  | 1.97E-112 | 1.20093406  | 0.86  | 0.342 | 4.29E-108 | CD69       | 1       | TCLIA_B cell |
| 9  | 1.55E-94  | 1.190490537 | 0.587 | 0.147 | 3.38E-90  | LINC00926  | 1       | TCLIA_B cell |
| 10 | 9.72E-80  | 1.161304204 | 0.432 | 0.076 | 2.12E-75  | BACH2      | 1       | TCLIA_B cell |
| 11 | 1.15E-106 | 1.139984245 | 0.916 | 0.736 | 2.50E-102 | DUSP1      | 1       | TCLIA_B cell |
| 12 | 2.83E-53  | 1.118714893 | 0.4   | 0.118 | 6.18E-49  | SESN1      | 1       | TCLIA_B cell |
| 13 | 3.67E-87  | 1.115070711 | 0.782 | 0.318 | 8.01E-83  | CD83       | 1       | TCLIA_B cell |
| 14 | 7.08E-58  | 1.086702747 | 0.732 | 0.613 | 1.54E-53  | CD55       | 1       | TCLIA_B cell |
| 15 | 4.55E-58  | 1.085517356 | 0.363 | 0.071 | 9.92E-54  | STAG3      | 1       | TCLIA_B cell |
| 16 | 8.57E-121 | 1.066952153 | 0.998 | 0.676 | 1.87E-116 | HLA-DRA    | 1       | TCLIA_B cell |
| 17 | 4.42E-20  | 1.03802117  | 0.314 | 0.17  | 9.64E-16  | CLEC2B     | 1       | TCLIA_B cell |
| 18 | 2.09E-28  | 1.032883369 | 0.39  | 0.215 | 4.56E-24  | YBX3       | 1       | TCLIA_B cell |
| 19 | 6.97E-66  | 1.023377505 | 0.658 | 0.329 | 1.52E-61  | FCMR       | 1       | TCLIA_B cell |
| 20 | 1.49E-110 | 0.984742983 | 0.943 | 0.776 | 3.25E-106 | LAPTM5     | 1       | TCLIA_B cell |
| 21 | 2.22E-97  | 0.972400564 | 0.96  | 0.941 | 4.85E-93  | JUNB       | 1       | TCLIA_B cell |
| 22 | 5.11E-97  | 0.96654971  | 0.941 | 0.809 | 1.11E-92  | HLA-DRB1   | 1       | TCLIA_B cell |
| 23 | 9.18E-58  | 0.964750798 | 0.836 | 0.736 | 2.00E-53  | FOS        | 1       | TCLIA_B cell |
| 24 | 2.31E-57  | 0.958977596 | 0.398 | 0.096 | 5.03E-53  | FAM129C    | 1       | TCLIA_B cell |
| 25 | 3.57E-65  | 0.951831601 | 0.445 | 0.109 | 7.79E-61  | AFF3       | 1       | TCLIA_B cell |
| 26 | 7.10E-139 | 0.944758769 | 1     | 0.976 | 1.55E-134 | RPS27      | 1       | TCLIA_B cell |
| 27 | 2.79E-157 | 0.944393469 | 1     | 0.993 | 6.09E-153 | RPS19      | 1       | TCLIA_B cell |
| 28 | 3.39E-55  | 0.938827879 | 0.462 | 0.155 | 7.40E-51  | HVCN1      | 1       | TCLIA_B cell |
| 29 | 3.93E-38  | 0.933296022 | 0.486 | 0.256 | 8.57E-34  | FOXP1      | 1       | TCLIA_B cell |
| 30 | 2.79E-48  | 0.931242212 | 0.666 | 0.426 | 6.09E-44  | SLC2A3     | 1       | TCLIA_B cell |
| 31 | 4.49E-45  | 0.926711455 | 0.562 | 0.297 | 9.80E-41  | IRF8       | 1       | TCLIA_B cell |
| 32 | 2.07E-15  | 0.920255282 | 0.455 | 0.421 | 4.51E-11  | TMEM123    | 1       | TCLIA_B cell |
| 33 | 7.45E-184 | 0.905581964 | 0.998 | 0.983 | 1.62E-179 | RPL18A     | 1       | TCLIA_B cell |
| 34 | 3.22E-37  | 0.897403113 | 0.545 | 0.352 | 7.02E-33  | CCND3      | 1       | TCLIA_B cell |
| 35 | 9.23E-45  | 0.894171868 | 0.464 | 0.181 | 2.01E-40  | TUBA1A     | 1       | TCLIA_B cell |
| 36 | 3.47E-75  | 0.891292857 | 0.683 | 0.232 | 7.57E-71  | LTB        | 1       | TCLIA_B cell |
| 37 | 2.28E-84  | 0.888365532 | 0.921 | 0.831 | 4.97E-80  | TSC22D3    | 1       | TCLIA_B cell |
| 38 | 2.39E-55  | 0.883974459 | 0.295 | 0.041 | 5.20E-51  | IGHD       | 1       | TCLIA_B cell |
| 39 | 2.35E-111 | 0.866249858 | 1     | 0.99  | 5.14E-107 | CD74       | 1       | TCLIA_B cell |
| 40 | 1.18E-71  | 0.865430185 | 0.901 | 0.86  | 2.58E-67  | ZFP36L2    | 1       | TCLIA_B cell |
| 41 | 4.17E-44  | 0.830770973 | 0.728 | 0.699 | 9.09E-40  | GLTSCR2    | 1       | TCLIA_B cell |
| 42 | 1.43E-19  | 0.829731626 | 0.636 | 0.672 | 3.13E-15  | GADD45B    | 1       | TCLIA_B cell |
| 43 | 6.40E-42  | 0.82961239  | 0.556 | 0.275 | 1.40E-37  | REL        | 1       | TCLIA_B cell |
| 44 | 1.98E-78  | 0.829093129 | 0.892 | 0.646 | 4.32E-74  | HLA-DPB1   | 1       | TCLIA_B cell |
| 45 | 4.87E-78  | 0.828094446 | 0.894 | 0.676 | 1.06E-73  | CD52       | 1       | TCLIA_B cell |
| 46 | 3.65E-38  | 0.823728577 | 0.307 | 0.086 | 7.95E-34  | FCRL1      | 1       | TCLIA_B cell |
| 47 | 1.19E-25  | 0.822016443 | 0.563 | 0.465 | 2.59E-21  | BIRC3      | 1       | TCLIA_B cell |
| 48 | 2.86E-14  | 0.818773171 | 0.487 | 0.48  | 6.24E-10  | RNASE6     | 1       | TCLIA_B cell |
| 49 | 1.74E-143 | 0.81842033  | 0.993 | 0.967 | 3.80E-139 | RPL21      | 1       | TCLIA_B cell |
| 50 | 1.56E-127 | 0.816576626 | 0.998 | 0.98  | 3.39E-123 | RPL39      | 1       | TCLIA_B cell |
| 51 | 2.48E-19  | 0.810617238 | 0.504 | 0.437 | 5.42E-15  | SNX2       | 1       | TCLIA_B cell |
| 52 | 6.10E-140 | 0.80814405  | 1     | 0.979 | 1.33E-135 | RPL32      | 1       | TCLIA_B cell |
| 53 | 2.54E-133 | 0.806746957 | 0.998 | 0.981 | 5.54E-129 | RPL30      | 1       | TCLIA_B cell |
| 54 | 1.03E-80  | 0.805512547 | 0.921 | 0.799 | 2.25E-76  | HLA-DQB1   | 1       | TCLIA_B cell |
| 55 | 1.02E-55  | 0.803352225 | 0.757 | 0.5   | 2.22E-51  | ZFP36L1    | 1       | TCLIA_B cell |
| 56 | 2.94E-15  | 0.797468064 | 0.528 | 0.535 | 6.42E-11  | RHOH       | 1       | TCLIA_B cell |
| 57 | 4.30E-43  | 0.793029585 | 0.41  | 0.141 | 9.37E-39  | TRIM22     | 1       | TCLIA_B cell |
| 58 | 2.17E-77  | 0.790043661 | 0.985 | 0.97  | 4.72E-73  | FTH1       | 1       | TCLIA_B cell |
| 59 | 1.51E-157 | 0.788740235 | 1     | 0.992 | 3.29E-153 | RPL13      | 1       | TCLIA_B cell |
| 60 | 4.78E-78  | 0.78746167  | 0.909 | 0.778 | 1.04E-73  | HLA-DPA1   | 1       | TCLIA_B cell |
| 61 | 2.35E-12  | 0.786880639 | 0.42  | 0.357 | 5.13E-08  | STK17A     | 1       | TCLIA_B cell |
| 62 | 9.85E-35  | 0.782732603 | 0.418 | 0.185 | 2.15E-30  | LBH        | 1       | TCLIA_B cell |
| 63 | 2.87E-32  | 0.77662535  | 0.27  | 0.079 | 6.26E-28  | FAM26F     | 1       | TCLIA_B cell |
| 64 | 1.61E-23  | 0.775854706 | 0.309 | 0.14  | 3.52E-19  | P11-693J15 | 1       | TCLIA_B cell |
| 65 | 5.50E-43  | 0.77250797  | 0.744 | 0.77  | 1.20E-38  | RPS4Y1     | 1       | TCLIA_B cell |
| 66 | 1.48E-19  | 0.768132389 | 0.53  | 0.467 | 3.23E-15  | SP100      | 1       | TCLIA_B cell |
| 67 | 1.00E-10  | 0.767008596 | 0.305 | 0.224 | 2.19E-06  | BTLA       | 1       | TCLIA_B cell |
| 68 | 3.83E-13  | 0.765474594 | 0.428 | 0.358 | 8.34E-09  | SELL       | 1       | TCLIA_B cell |



|     |           |             |       |       |             |          |   |              |
|-----|-----------|-------------|-------|-------|-------------|----------|---|--------------|
| 69  | 1.03E-23  | 0.763416103 | 0.278 | 0.116 | 2.24E-19    | CAMK2D   | 1 | TCLIA_B cell |
| 70  | 1.73E-124 | 0.760519944 | 0.998 | 0.963 | 3.77E-120   | RPL12    | 1 | TCLIA_B cell |
| 71  | 7.91E-125 | 0.758614669 | 0.998 | 0.984 | 1.73E-120   | RPL34    | 1 | TCLIA_B cell |
| 72  | 3.14E-132 | 0.754155297 | 0.995 | 0.972 | 6.84E-128   | RPL26    | 1 | TCLIA_B cell |
| 73  | 7.34E-77  | 0.754023849 | 0.798 | 0.295 | 1.60E-72    | MS4A1    | 1 | TCLIA_B cell |
| 74  | 1.72E-38  | 0.753202401 | 0.332 | 0.096 | 3.76E-34    | CD72     | 1 | TCLIA_B cell |
| 75  | 5.15E-134 | 0.752358485 | 1     | 0.983 | 1.12E-129   | RPS23    | 1 | TCLIA_B cell |
| 76  | 2.47E-69  | 0.749989668 | 0.877 | 0.599 | 5.39E-65    | HLA-DQA1 | 1 | TCLIA_B cell |
| 77  | 1.71E-127 | 0.749058744 | 1     | 0.983 | 3.73E-123   | RPS27A   | 1 | TCLIA_B cell |
| 78  | 1.77E-137 | 0.744867002 | 0.998 | 0.975 | 3.85E-133   | RPS3A    | 1 | TCLIA_B cell |
| 79  | 1.20E-44  | 0.743512181 | 0.75  | 0.658 | 2.63E-40    | ZFAS1    | 1 | TCLIA_B cell |
| 80  | 2.13E-44  | 0.739411329 | 0.779 | 0.716 | 4.65E-40    | HLA-DRB5 | 1 | TCLIA_B cell |
| 81  | 9.97E-44  | 0.736447297 | 0.749 | 0.705 | 2.17E-39    | COMMD6   | 1 | TCLIA_B cell |
| 82  | 1.10E-36  | 0.73530169  | 0.196 | 0.025 | 2.40E-32    | PCDH9    | 1 | TCLIA_B cell |
| 83  | 3.17E-20  | 0.733029127 | 0.411 | 0.251 | 6.90E-16    | ID3      | 1 | TCLIA_B cell |
| 84  | 1.86E-108 | 0.724140528 | 0.985 | 0.946 | 4.06E-104   | RPSA     | 1 | TCLIA_B cell |
| 85  | 1.52E-13  | 0.723606223 | 0.481 | 0.446 | 3.31E-09    | RCSD1    | 1 | TCLIA_B cell |
| 86  | 3.26E-114 | 0.720423676 | 0.993 | 0.961 | 7.11E-110   | RPL22    | 1 | TCLIA_B cell |
| 87  | 1.06E-34  | 0.719472796 | 0.727 | 0.776 | 2.31E-30    | PNRC1    | 1 | TCLIA_B cell |
| 88  | 3.69E-88  | 0.713885204 | 0.943 | 0.914 | 8.04E-84    | PFDN5    | 1 | TCLIA_B cell |
| 89  | 4.75E-131 | 0.708149539 | 0.992 | 0.974 | 1.04E-126   | RPS5     | 1 | TCLIA_B cell |
| 90  | 1.13E-124 | 0.706091535 | 0.997 | 0.978 | 2.47E-120   | RPL37    | 1 | TCLIA_B cell |
| 91  | 7.71E-108 | 0.70481687  | 0.985 | 0.955 | 1.68E-103   | RPL10A   | 1 | TCLIA_B cell |
| 92  | 1.01E-14  | 0.70470532  | 0.344 | 0.204 | 2.21E-10    | AREG     | 1 | TCLIA_B cell |
| 93  | 4.72E-15  | 0.703162542 | 0.474 | 0.41  | 1.03E-10    | TNFAIP8  | 1 | TCLIA_B cell |
| 94  | 1.04E-09  | 0.702697878 | 0.47  | 0.469 | 2.27E-05    | DNAJB1   | 1 | TCLIA_B cell |
| 95  | 7.11E-10  | 0.700527887 | 0.538 | 0.649 | 1.55E-05    | CD79B    | 1 | TCLIA_B cell |
| 96  | 1.62E-15  | 0.69885842  | 0.573 | 0.608 | 3.52E-11    | LIMD2    | 1 | TCLIA_B cell |
| 97  | 6.68E-20  | 0.698533893 | 0.644 | 0.65  | 1.46E-15    | DDIT4    | 1 | TCLIA_B cell |
| 98  | 3.48E-14  | 0.695910366 | 0.568 | 0.61  | 7.58E-10    | TAGAP    | 1 | TCLIA_B cell |
| 99  | 5.29E-138 | 0.688459574 | 1     | 0.988 | 1.15E-133   | RPL18    | 1 | TCLIA_B cell |
| 100 | 1.69E-34  | 0.685130245 | 0.396 | 0.154 | 3.69E-30    | 1-Mar    | 1 | TCLIA_B cell |
| 101 | 1.06E-33  | 0.683547272 | 0.185 | 0.026 | 2.31E-29    | CD200    | 1 | TCLIA_B cell |
| 102 | 2.10E-121 | 0.673909632 | 0.998 | 0.967 | 4.59E-117   | RPL35A   | 1 | TCLIA_B cell |
| 103 | 4.49E-20  | 0.669211465 | 0.32  | 0.158 | 9.80E-16    | FAM65B   | 1 | TCLIA_B cell |
| 104 | 4.84E-124 | 0.668465748 | 0.998 | 0.975 | 1.06E-119   | RPS10    | 1 | TCLIA_B cell |
| 105 | 3.27E-10  | 0.664024728 | 0.255 | 0.162 | 7.14E-06    | MYADM    | 1 | TCLIA_B cell |
| 106 | 2.81E-25  | 0.663789758 | 0.698 | 0.791 | 6.12E-21    | CIRBP    | 1 | TCLIA_B cell |
| 107 | 3.67E-27  | 0.659696109 | 0.285 | 0.098 | 8.01E-23    | MTSS1    | 1 | TCLIA_B cell |
| 108 | 3.42E-88  | 0.65876637  | 0.987 | 0.973 | 7.45E-84    | EIF1     | 1 | TCLIA_B cell |
| 109 | 1.04E-45  | 0.658170588 | 0.784 | 0.849 | 2.27E-41    | SARAF    | 1 | TCLIA_B cell |
| 110 | 3.93E-07  | 0.657954497 | 0.408 | 0.416 | 0.008565061 | SNHG7    | 1 | TCLIA_B cell |
| 111 | 5.36E-121 | 0.655797484 | 0.998 | 0.974 | 1.17E-116   | RPL29    | 1 | TCLIA_B cell |
| 112 | 1.33E-101 | 0.64682966  | 0.997 | 0.963 | 2.89E-97    | RPS25    | 1 | TCLIA_B cell |
| 113 | 1.20E-09  | 0.643538161 | 0.535 | 0.649 | 2.62E-05    | NCF1     | 1 | TCLIA_B cell |
| 114 | 4.42E-26  | 0.641808749 | 0.31  | 0.122 | 9.64E-22    | HLA-DMB  | 1 | TCLIA_B cell |
| 115 | 4.28E-22  | 0.639108184 | 0.691 | 0.803 | 9.34E-18    | BRD2     | 1 | TCLIA_B cell |
| 116 | 3.17E-93  | 0.635640107 | 0.981 | 0.957 | 6.91E-89    | RPL13A   | 1 | TCLIA_B cell |
| 117 | 5.30E-08  | 0.628130535 | 0.388 | 0.35  | 0.001155979 | ANKRD44  | 1 | TCLIA_B cell |
| 118 | 5.45E-64  | 0.627713727 | 0.916 | 0.918 | 1.19E-59    | RPL38    | 1 | TCLIA_B cell |
| 119 | 1.61E-106 | 0.626301191 | 1     | 0.983 | 3.51E-102   | RPS21    | 1 | TCLIA_B cell |
| 120 | 7.84E-28  | 0.626225826 | 0.288 | 0.095 | 1.71E-23    | CD22     | 1 | TCLIA_B cell |
| 121 | 1.74E-112 | 0.624211263 | 0.997 | 0.987 | 3.79E-108   | FAU      | 1 | TCLIA_B cell |
| 122 | 4.50E-116 | 0.624125265 | 0.998 | 0.973 | 9.81E-112   | RPS13    | 1 | TCLIA_B cell |
| 123 | 1.05E-28  | 0.620311027 | 0.31  | 0.107 | 2.29E-24    | CXCR5    | 1 | TCLIA_B cell |
| 124 | 4.05E-38  | 0.616748126 | 0.777 | 0.796 | 8.84E-34    | RPS20    | 1 | TCLIA_B cell |
| 125 | 2.44E-08  | 0.614896806 | 0.27  | 0.19  | 0.00053169  | UVRAG    | 1 | TCLIA_B cell |
| 126 | 3.07E-23  | 0.614853999 | 0.189 | 0.048 | 6.70E-19    | ARRDC2   | 1 | TCLIA_B cell |
| 127 | 1.04E-12  | 0.614533724 | 0.555 | 0.57  | 2.27E-08    | HLA-DMA  | 1 | TCLIA_B cell |
| 128 | 5.92E-09  | 0.612416361 | 0.334 | 0.244 | 0.000129206 | ZNF331   | 1 | TCLIA_B cell |
| 129 | 1.67E-07  | 0.608710123 | 0.459 | 0.487 | 0.003651846 | LYN      | 1 | TCLIA_B cell |
| 130 | 3.36E-80  | 0.60505303  | 0.973 | 0.94  | 7.32E-76    | RPL9     | 1 | TCLIA_B cell |
| 131 | 2.94E-72  | 0.603121783 | 0.987 | 0.928 | 6.40E-68    | TMSB4X   | 1 | TCLIA_B cell |
| 132 | 3.29E-23  | 0.601386927 | 0.511 | 0.321 | 7.18E-19    | BANK1    | 1 | TCLIA_B cell |
| 133 | 3.26E-09  | 0.598492807 | 0.275 | 0.189 | 7.11E-05    | DCK      | 1 | TCLIA_B cell |
| 134 | 4.03E-35  | 0.597732084 | 0.843 | 0.921 | 8.79E-31    | IER2     | 1 | TCLIA_B cell |
| 135 | 1.24E-87  | 0.593601633 | 0.988 | 0.965 | 2.71E-83    | GNB2L1   | 1 | TCLIA_B cell |
| 136 | 6.90E-14  | 0.592638031 | 0.322 | 0.204 | 1.51E-09    | EVL      | 1 | TCLIA_B cell |
| 137 | 2.45E-84  | 0.589065504 | 0.981 | 0.967 | 5.35E-80    | RPS9     | 1 | TCLIA_B cell |
| 138 | 3.03E-89  | 0.588350658 | 0.997 | 0.958 | 6.60E-85    | RPL17    | 1 | TCLIA_B cell |
| 139 | 3.29E-77  | 0.587410036 | 0.965 | 0.961 | 7.17E-73    | RPS11    | 1 | TCLIA_B cell |

|     |           |             |       |       |             |             |   |              |
|-----|-----------|-------------|-------|-------|-------------|-------------|---|--------------|
| 140 | 2.65E-17  | 0.586642119 | 0.519 | 0.41  | 5.77E-13    | IFITM2      | 1 | TCLIA_B cell |
| 141 | 5.66E-109 | 0.58594472  | 1     | 0.985 | 1.23E-104   | RPL19       | 1 | TCLIA_B cell |
| 142 | 5.00E-07  | 0.583341898 | 0.322 | 0.269 | 0.010911229 | MAPRE2      | 1 | TCLIA_B cell |
| 143 | 1.76E-88  | 0.582288545 | 1     | 0.983 | 3.84E-84    | RPS12       | 1 | TCLIA_B cell |
| 144 | 1.26E-98  | 0.581764759 | 1     | 0.993 | 2.75E-94    | RPL11       | 1 | TCLIA_B cell |
| 145 | 3.72E-22  | 0.580820094 | 0.305 | 0.131 | 8.10E-18    | LY86        | 1 | TCLIA_B cell |
| 146 | 7.29E-95  | 0.578041496 | 1     | 0.996 | 1.59E-90    | EEF1A1      | 1 | TCLIA_B cell |
| 147 | 3.90E-88  | 0.574680412 | 1     | 0.968 | 8.51E-84    | RPS6        | 1 | TCLIA_B cell |
| 148 | 2.70E-78  | 0.573799954 | 0.992 | 0.974 | 5.89E-74    | TMSB10      | 1 | TCLIA_B cell |
| 149 | 7.92E-11  | 0.573195416 | 0.283 | 0.186 | 1.73E-06    | RASGRP2     | 1 | TCLIA_B cell |
| 150 | 7.53E-114 | 0.572791522 | 1     | 0.997 | 1.64E-109   | RPL10       | 1 | TCLIA_B cell |
| 151 | 1.65E-16  | 0.572655851 | 0.221 | 0.095 | 3.59E-12    | ITPR1       | 1 | TCLIA_B cell |
| 152 | 1.45E-104 | 0.572135393 | 1     | 0.997 | 3.17E-100   | AC090498.1  | 1 | TCLIA_B cell |
| 153 | 2.61E-71  | 0.571875509 | 0.958 | 0.958 | 5.69E-67    | UBA52       | 1 | TCLIA_B cell |
| 154 | 2.32E-36  | 0.569476601 | 0.16  | 0.011 | 5.07E-32    | SATB1       | 1 | TCLIA_B cell |
| 155 | 2.96E-105 | 0.56776675  | 1     | 0.988 | 6.45E-101   | RPS15       | 1 | TCLIA_B cell |
| 156 | 3.00E-10  | 0.566850148 | 0.229 | 0.135 | 6.55E-06    | CTB-133G6.  | 1 | TCLIA_B cell |
| 157 | 2.03E-61  | 0.565029852 | 0.926 | 0.957 | 4.43E-57    | EEF1D       | 1 | TCLIA_B cell |
| 158 | 3.61E-104 | 0.564461271 | 1     | 0.991 | 7.87E-100   | RPL28       | 1 | TCLIA_B cell |
| 159 | 5.02E-94  | 0.56410226  | 0.997 | 0.987 | 1.10E-89    | RPLP2       | 1 | TCLIA_B cell |
| 160 | 6.63E-69  | 0.559822445 | 0.973 | 0.941 | 1.45E-64    | RPS29       | 1 | TCLIA_B cell |
| 161 | 6.79E-14  | 0.553401343 | 0.221 | 0.103 | 1.48E-09    | RP11-796E2. | 1 | TCLIA_B cell |
| 162 | 1.94E-39  | 0.552293385 | 0.804 | 0.84  | 4.24E-35    | TOMM7       | 1 | TCLIA_B cell |
| 163 | 1.90E-51  | 0.546600705 | 0.889 | 0.921 | 4.14E-47    | PABPC1      | 1 | TCLIA_B cell |
| 164 | 9.59E-20  | 0.546486169 | 0.256 | 0.101 | 2.09E-15    | CCR7        | 1 | TCLIA_B cell |
| 165 | 1.93E-06  | 0.544913161 | 0.196 | 0.132 | 0.042120137 | SNX29       | 1 | TCLIA_B cell |
| 166 | 2.59E-09  | 0.544608643 | 0.572 | 0.704 | 5.65E-05    | SF1         | 1 | TCLIA_B cell |
| 167 | 1.36E-09  | 0.543945052 | 0.26  | 0.167 | 2.96E-05    | UTRN        | 1 | TCLIA_B cell |
| 168 | 1.28E-17  | 0.541742731 | 0.659 | 0.805 | 2.79E-13    | EIF3E       | 1 | TCLIA_B cell |
| 169 | 7.84E-15  | 0.537234126 | 0.197 | 0.082 | 1.71E-10    | SSBP2       | 1 | TCLIA_B cell |
| 170 | 4.50E-16  | 0.536107262 | 0.175 | 0.062 | 9.81E-12    | AC245100.1  | 1 | TCLIA_B cell |
| 171 | 8.15E-07  | 0.535919055 | 0.524 | 0.678 | 0.017775215 | ANAPC16     | 1 | TCLIA_B cell |
| 172 | 8.06E-17  | 0.535355906 | 0.717 | 0.774 | 1.76E-12    | NFKBIA      | 1 | TCLIA_B cell |
| 173 | 8.09E-20  | 0.532821799 | 0.648 | 0.625 | 1.76E-15    | PTPRC       | 1 | TCLIA_B cell |
| 174 | 8.10E-104 | 0.53038478  | 1     | 0.992 | 1.77E-99    | RPS8        | 1 | TCLIA_B cell |
| 175 | 4.66E-13  | 0.526722295 | 0.302 | 0.184 | 1.02E-08    | TRBC2       | 1 | TCLIA_B cell |
| 176 | 3.05E-79  | 0.525945229 | 0.992 | 0.974 | 6.66E-75    | RPL15       | 1 | TCLIA_B cell |
| 177 | 1.13E-06  | 0.525519998 | 0.545 | 0.701 | 0.024699493 | ATP6V1G1    | 1 | TCLIA_B cell |
| 178 | 1.74E-93  | 0.525287047 | 0.997 | 0.985 | 3.79E-89    | RPS28       | 1 | TCLIA_B cell |
| 179 | 4.01E-96  | 0.52485969  | 1     | 0.99  | 8.75E-92    | RPL8        | 1 | TCLIA_B cell |
| 180 | 4.15E-10  | 0.523573676 | 0.391 | 0.312 | 9.05E-06    | SYPL1       | 1 | TCLIA_B cell |
| 181 | 6.49E-46  | 0.519320206 | 0.892 | 0.927 | 1.42E-41    | CD79A       | 1 | TCLIA_B cell |
| 182 | 1.99E-12  | 0.515784643 | 0.226 | 0.115 | 4.35E-08    | PKIG        | 1 | TCLIA_B cell |
| 183 | 1.48E-76  | 0.515255699 | 0.988 | 0.963 | 3.23E-72    | RPL6        | 1 | TCLIA_B cell |
| 184 | 1.01E-16  | 0.514872543 | 0.196 | 0.072 | 2.20E-12    | PIK3IP1     | 1 | TCLIA_B cell |
| 185 | 9.43E-70  | 0.511628888 | 0.985 | 0.973 | 2.06E-65    | RPL37A      | 1 | TCLIA_B cell |
| 186 | 9.58E-14  | 0.506781324 | 0.234 | 0.111 | 2.09E-09    | VPREB3      | 1 | TCLIA_B cell |
| 187 | 1.10E-11  | 0.506374814 | 0.423 | 0.325 | 2.40E-07    | RNASET2     | 1 | TCLIA_B cell |
| 188 | 2.04E-30  | 0.505457233 | 0.762 | 0.855 | 4.46E-26    | PCBP2       | 1 | TCLIA_B cell |
| 189 | 6.48E-72  | 0.504518126 | 0.985 | 0.967 | 1.41E-67    | RPL5        | 1 | TCLIA_B cell |
| 190 | 5.24E-87  | 0.50296992  | 0.998 | 0.974 | 1.14E-82    | RPS7        | 1 | TCLIA_B cell |
| 191 | 8.85E-68  | 0.502767507 | 0.975 | 0.964 | 1.93E-63    | NACA        | 1 | TCLIA_B cell |
| 192 | 1.97E-72  | 0.501724151 | 0.995 | 0.988 | 4.29E-68    | RPS18       | 1 | TCLIA_B cell |
| 193 | 1.24E-38  | 0.501076446 | 0.865 | 0.901 | 2.70E-34    | RPL31       | 1 | TCLIA_B cell |
| 194 | 3.26E-14  | 0.500342349 | 0.676 | 0.823 | 7.12E-10    | UBB         | 1 | TCLIA_B cell |
| 195 | 2.53E-09  | 0.499650995 | 0.351 | 0.261 | 5.52E-05    | ADAM28      | 1 | TCLIA_B cell |
| 196 | 7.38E-71  | 0.497049411 | 0.992 | 0.963 | 1.61E-66    | RPL23A      | 1 | TCLIA_B cell |
| 197 | 7.75E-08  | 0.496580817 | 0.58  | 0.707 | 0.001689929 | FUS         | 1 | TCLIA_B cell |
| 198 | 2.28E-30  | 0.49586723  | 0.874 | 0.935 | 4.97E-26    | ZFP36       | 1 | TCLIA_B cell |
| 199 | 7.15E-08  | 0.495057465 | 0.184 | 0.108 | 0.001559016 | PLEKHA2     | 1 | TCLIA_B cell |
| 200 | 7.82E-73  | 0.494267926 | 0.992 | 0.968 | 1.71E-68    | RPL36       | 1 | TCLIA_B cell |
| 201 | 1.18E-27  | 0.493579998 | 0.147 | 0.017 | 2.57E-23    | ZBTB16      | 1 | TCLIA_B cell |
| 202 | 5.63E-81  | 0.490051489 | 0.997 | 0.988 | 1.23E-76    | RPS15A      | 1 | TCLIA_B cell |
| 203 | 1.30E-06  | 0.488247342 | 0.513 | 0.587 | 0.0284492   | CD53        | 1 | TCLIA_B cell |
| 204 | 1.03E-28  | 0.479845909 | 0.791 | 0.893 | 2.24E-24    | YWHAZ       | 1 | TCLIA_B cell |
| 205 | 2.21E-27  | 0.476812069 | 0.793 | 0.917 | 4.83E-23    | DDX5        | 1 | TCLIA_B cell |
| 206 | 2.10E-07  | 0.47355938  | 0.218 | 0.141 | 0.004571764 | BCL11A      | 1 | TCLIA_B cell |
| 207 | 6.00E-56  | 0.473032669 | 0.965 | 0.964 | 1.31E-51    | RPL24       | 1 | TCLIA_B cell |
| 208 | 7.23E-13  | 0.472267306 | 0.256 | 0.133 | 1.58E-08    | PARP15      | 1 | TCLIA_B cell |
| 209 | 1.50E-23  | 0.468042012 | 0.143 | 0.023 | 3.28E-19    | P11-231C14  | 1 | TCLIA_B cell |
| 210 | 4.13E-12  | 0.467991832 | 0.627 | 0.712 | 9.01E-08    | ARHGDI B    | 1 | TCLIA_B cell |

|     |          |             |       |       |             |            |   |              |
|-----|----------|-------------|-------|-------|-------------|------------|---|--------------|
| 211 | 3.71E-08 | 0.464502739 | 0.582 | 0.591 | 0.000809435 | NR4A2      | 1 | TCLIA_B cell |
| 212 | 2.15E-44 | 0.46395731  | 0.914 | 0.92  | 4.68E-40    | RPL27      | 1 | TCLIA_B cell |
| 213 | 4.38E-69 | 0.460994366 | 0.997 | 0.973 | 9.56E-65    | RPS14      | 1 | TCLIA_B cell |
| 214 | 1.01E-12 | 0.455743137 | 0.14  | 0.049 | 2.20E-08    | LAIR1      | 1 | TCLIA_B cell |
| 215 | 1.48E-20 | 0.453717978 | 0.73  | 0.829 | 3.22E-16    | PTPRCAP    | 1 | TCLIA_B cell |
| 216 | 7.10E-14 | 0.451740132 | 0.241 | 0.115 | 1.55E-09    | KIAA0226L  | 1 | TCLIA_B cell |
| 217 | 4.09E-10 | 0.449910912 | 0.214 | 0.113 | 8.91E-06    | TMEM2      | 1 | TCLIA_B cell |
| 218 | 1.37E-48 | 0.44469091  | 0.998 | 0.989 | 2.98E-44    | PTMA       | 1 | TCLIA_B cell |
| 219 | 2.63E-55 | 0.443657913 | 0.99  | 0.97  | 5.75E-51    | RPL14      | 1 | TCLIA_B cell |
| 220 | 2.77E-11 | 0.440027565 | 0.272 | 0.155 | 6.04E-07    | BLK        | 1 | TCLIA_B cell |
| 221 | 1.97E-63 | 0.436637226 | 0.997 | 0.987 | 4.29E-59    | RPS3       | 1 | TCLIA_B cell |
| 222 | 4.73E-61 | 0.434219954 | 0.998 | 0.996 | 1.03E-56    | MT-ND3     | 1 | TCLIA_B cell |
| 223 | 1.20E-59 | 0.433614772 | 0.99  | 0.977 | 2.62E-55    | RPS24      | 1 | TCLIA_B cell |
| 224 | 8.83E-07 | 0.431512677 | 0.17  | 0.102 | 0.019249869 | GSAP       | 1 | TCLIA_B cell |
| 225 | 8.35E-23 | 0.43125597  | 0.11  | 0.01  | 1.82E-18    | HS3ST1     | 1 | TCLIA_B cell |
| 226 | 3.30E-13 | 0.426949423 | 0.683 | 0.837 | 7.19E-09    | CCNI       | 1 | TCLIA_B cell |
| 227 | 2.60E-48 | 0.426026019 | 0.978 | 0.966 | 5.66E-44    | RPL35      | 1 | TCLIA_B cell |
| 228 | 3.31E-10 | 0.423340573 | 0.142 | 0.06  | 7.21E-06    | ZNF318     | 1 | TCLIA_B cell |
| 229 | 3.95E-58 | 0.42313682  | 0.995 | 0.976 | 8.62E-54    | RPS16      | 1 | TCLIA_B cell |
| 230 | 4.07E-18 | 0.422899614 | 0.718 | 0.833 | 8.88E-14    | RPL23      | 1 | TCLIA_B cell |
| 231 | 9.29E-59 | 0.422224939 | 0.988 | 0.983 | 2.03E-54    | RPL3       | 1 | TCLIA_B cell |
| 232 | 5.61E-63 | 0.420077048 | 0.993 | 0.984 | 1.22E-58    | RPS4X      | 1 | TCLIA_B cell |
| 233 | 3.85E-33 | 0.417766342 | 0.906 | 0.973 | 8.40E-29    | MT-ND2     | 1 | TCLIA_B cell |
| 234 | 2.07E-13 | 0.415203521 | 0.125 | 0.037 | 4.52E-09    | COL19A1    | 1 | TCLIA_B cell |
| 235 | 3.27E-10 | 0.413591228 | 0.137 | 0.055 | 7.14E-06    | PTGER4     | 1 | TCLIA_B cell |
| 236 | 4.55E-07 | 0.41080932  | 0.599 | 0.749 | 0.009913298 | MYL12A     | 1 | TCLIA_B cell |
| 237 | 8.80E-16 | 0.409124546 | 0.118 | 0.027 | 1.92E-11    | C1orf162   | 1 | TCLIA_B cell |
| 238 | 3.22E-31 | 0.406564873 | 0.912 | 0.924 | 7.03E-27    | RPL7       | 1 | TCLIA_B cell |
| 239 | 1.99E-09 | 0.405795502 | 0.614 | 0.786 | 4.35E-05    | HNRNPK     | 1 | TCLIA_B cell |
| 240 | 5.94E-12 | 0.403182625 | 0.13  | 0.044 | 1.29E-07    | AC241585.2 | 1 | TCLIA_B cell |
| 241 | 3.94E-07 | 0.399620293 | 0.607 | 0.791 | 0.008594075 | FXYP5      | 1 | TCLIA_B cell |
| 242 | 2.16E-07 | 0.399293331 | 0.6   | 0.741 | 0.004708124 | CALM2      | 1 | TCLIA_B cell |
| 243 | 2.79E-10 | 0.397491265 | 0.145 | 0.062 | 6.09E-06    | MGAT5      | 1 | TCLIA_B cell |
| 244 | 7.39E-11 | 0.395398603 | 0.16  | 0.068 | 1.61E-06    | GAPT       | 1 | TCLIA_B cell |
| 245 | 2.58E-10 | 0.391027735 | 0.72  | 0.78  | 5.62E-06    | JUN        | 1 | TCLIA_B cell |
| 246 | 3.08E-08 | 0.387903291 | 0.201 | 0.112 | 0.000671683 | TGIF1      | 1 | TCLIA_B cell |
| 247 | 6.52E-21 | 0.385591098 | 0.899 | 0.972 | 1.42E-16    | H3F3B      | 1 | TCLIA_B cell |
| 248 | 1.10E-12 | 0.384344935 | 0.268 | 0.139 | 2.39E-08    | CD24       | 1 | TCLIA_B cell |
| 249 | 2.66E-12 | 0.38277617  | 0.793 | 0.907 | 5.81E-08    | HSP90AB1   | 1 | TCLIA_B cell |
| 250 | 3.40E-07 | 0.381873111 | 0.159 | 0.087 | 0.007410291 | ARHGAP17   | 1 | TCLIA_B cell |
| 251 | 3.41E-07 | 0.380983217 | 0.175 | 0.101 | 0.007436225 | PAX5       | 1 | TCLIA_B cell |
| 252 | 4.85E-31 | 0.379256836 | 0.931 | 0.961 | 1.06E-26    | RPL41      | 1 | TCLIA_B cell |
| 253 | 1.17E-09 | 0.377857777 | 0.196 | 0.1   | 2.54E-05    | SPIB       | 1 | TCLIA_B cell |
| 254 | 1.11E-26 | 0.371166366 | 0.852 | 0.914 | 2.42E-22    | COX4I1     | 1 | TCLIA_B cell |
| 255 | 7.17E-09 | 0.36995985  | 0.123 | 0.051 | 0.000156409 | ARAP2      | 1 | TCLIA_B cell |
| 256 | 4.22E-07 | 0.369288714 | 0.111 | 0.051 | 0.009202666 | SESTD1     | 1 | TCLIA_B cell |
| 257 | 6.13E-33 | 0.369069874 | 0.943 | 0.989 | 1.34E-28    | MT-ND4     | 1 | TCLIA_B cell |
| 258 | 2.86E-21 | 0.362325736 | 0.798 | 0.874 | 6.23E-17    | BTF3       | 1 | TCLIA_B cell |
| 259 | 1.78E-10 | 0.360374198 | 0.142 | 0.057 | 3.88E-06    | HHEX       | 1 | TCLIA_B cell |
| 260 | 1.98E-15 | 0.3588783   | 0.771 | 0.88  | 4.31E-11    | HNRNPA1    | 1 | TCLIA_B cell |
| 261 | 9.78E-08 | 0.3567027   | 0.634 | 0.796 | 0.002131826 | SH3BGRL3   | 1 | TCLIA_B cell |
| 262 | 1.52E-16 | 0.356068425 | 0.759 | 0.905 | 3.32E-12    | HLA-E      | 1 | TCLIA_B cell |
| 263 | 3.16E-11 | 0.355565704 | 0.108 | 0.032 | 6.89E-07    | NT5E       | 1 | TCLIA_B cell |
| 264 | 6.81E-07 | 0.355218333 | 0.728 | 0.879 | 0.014850896 | HSP90AA1   | 1 | TCLIA_B cell |
| 265 | 9.75E-11 | 0.354664238 | 0.138 | 0.053 | 2.13E-06    | ABLIM1     | 1 | TCLIA_B cell |
| 266 | 1.21E-07 | 0.354503107 | 0.135 | 0.066 | 0.002640474 | HLA-DOA    | 1 | TCLIA_B cell |
| 267 | 4.18E-10 | 0.351460908 | 0.126 | 0.048 | 9.12E-06    | P11-624C23 | 1 | TCLIA_B cell |
| 268 | 8.05E-11 | 0.343245306 | 0.681 | 0.836 | 1.76E-06    | ARPC3      | 1 | TCLIA_B cell |
| 269 | 7.32E-10 | 0.342286498 | 0.693 | 0.812 | 1.60E-05    | RPS17      | 1 | TCLIA_B cell |
| 270 | 1.62E-07 | 0.342213742 | 0.15  | 0.076 | 0.00352641  | TRAF5      | 1 | TCLIA_B cell |
| 271 | 2.42E-07 | 0.341601019 | 0.128 | 0.062 | 0.005278048 | JAZF1      | 1 | TCLIA_B cell |
| 272 | 2.10E-13 | 0.341516725 | 0.126 | 0.037 | 4.57E-09    | IL13RA1    | 1 | TCLIA_B cell |
| 273 | 3.41E-34 | 0.339371569 | 0.966 | 0.966 | 7.43E-30    | EEF1B2     | 1 | TCLIA_B cell |
| 274 | 4.03E-09 | 0.334241759 | 0.668 | 0.857 | 8.79E-05    | HNRNPDL    | 1 | TCLIA_B cell |
| 275 | 2.55E-23 | 0.334193901 | 0.904 | 0.951 | 5.55E-19    | RPL4       | 1 | TCLIA_B cell |
| 276 | 1.77E-21 | 0.333433459 | 0.87  | 0.915 | 3.86E-17    | EEF1G      | 1 | TCLIA_B cell |
| 277 | 3.61E-15 | 0.331034131 | 0.799 | 0.895 | 7.86E-11    | RPL36A     | 1 | TCLIA_B cell |
| 278 | 6.22E-08 | 0.325232781 | 0.103 | 0.041 | 0.001355925 | C12orf42   | 1 | TCLIA_B cell |
| 279 | 2.34E-09 | 0.325158398 | 0.126 | 0.051 | 5.11E-05    | LGALS9     | 1 | TCLIA_B cell |
| 280 | 1.75E-07 | 0.321515955 | 0.18  | 0.099 | 0.003814677 | ZEB2       | 1 | TCLIA_B cell |
| 281 | 1.08E-44 | 0.320784229 | 1     | 0.997 | 2.36E-40    | RPLP1      | 1 | TCLIA_B cell |

|     |          |              |       |       |             |          |   |              |
|-----|----------|--------------|-------|-------|-------------|----------|---|--------------|
| 282 | 4.17E-09 | 0.314348442  | 0.115 | 0.043 | 9.10E-05    | GPR18    | 1 | TCLIA_B cell |
| 283 | 8.00E-09 | 0.308183377  | 0.132 | 0.057 | 0.000174475 | LYSMD2   | 1 | TCLIA_B cell |
| 284 | 7.49E-13 | 0.304015495  | 0.781 | 0.892 | 1.63E-08    | RPL27A   | 1 | TCLIA_B cell |
| 285 | 1.35E-12 | 0.303307602  | 0.774 | 0.882 | 2.95E-08    | HINT1    | 1 | TCLIA_B cell |
| 286 | 3.59E-07 | 0.30290112   | 0.174 | 0.348 | 0.007838441 | RNF13    | 1 | TCLIA_B cell |
| 287 | 6.04E-15 | 0.301626112  | 0.848 | 0.928 | 1.32E-10    | OAZ1     | 1 | TCLIA_B cell |
| 288 | 2.71E-43 | 0.297203759  | 1     | 1     | 5.91E-39    | MALAT1   | 1 | TCLIA_B cell |
| 289 | 9.39E-07 | 0.285841496  | 0.175 | 0.344 | 0.020486462 | CD46     | 1 | TCLIA_B cell |
| 290 | 4.50E-24 | 0.278048412  | 0.953 | 0.991 | 9.82E-20    | MT-ND1   | 1 | TCLIA_B cell |
| 291 | 1.30E-06 | 0.277683435  | 0.243 | 0.459 | 0.028378536 | AMD1     | 1 | TCLIA_B cell |
| 292 | 8.81E-09 | 0.273838451  | 0.206 | 0.427 | 0.000192201 | CNOT7    | 1 | TCLIA_B cell |
| 293 | 1.41E-09 | 0.271862     | 0.757 | 0.881 | 3.07E-05    | COX7C    | 1 | TCLIA_B cell |
| 294 | 4.03E-27 | 0.271851421  | 0.995 | 0.988 | 8.78E-23    | RPL7A    | 1 | TCLIA_B cell |
| 295 | 2.27E-07 | 0.269806314  | 0.15  | 0.308 | 0.004958925 | AP3B1    | 1 | TCLIA_B cell |
| 296 | 1.72E-06 | 0.268171193  | 0.182 | 0.352 | 0.037511611 | RNASEH2B | 1 | TCLIA_B cell |
| 297 | 9.54E-07 | 0.263861881  | 0.179 | 0.349 | 0.02080277  | CASP4    | 1 | TCLIA_B cell |
| 298 | 2.01E-07 | 0.263395514  | 0.209 | 0.412 | 0.004386714 | HSPA4    | 1 | TCLIA_B cell |
| 299 | 1.38E-09 | 0.256408568  | 0.199 | 0.426 | 3.00E-05    | U2SURP   | 1 | TCLIA_B cell |
| 300 | 1.15E-06 | 0.255973561  | 0.209 | 0.4   | 0.025038891 | RAB11A   | 1 | TCLIA_B cell |
| 301 | 7.83E-07 | 0.254579775  | 0.125 | 0.258 | 0.01706678  | NSL1     | 1 | TCLIA_B cell |
| 302 | 6.81E-07 | 0.253102627  | 0.167 | 0.329 | 0.014845458 | CGGBP1   | 1 | TCLIA_B cell |
| 303 | 5.18E-08 | 0.252664564  | 0.201 | 0.408 | 0.001129778 | BTK      | 1 | TCLIA_B cell |
| 304 | 4.51E-08 | 0.252094394  | 0.143 | 0.304 | 0.000984021 | TMEM134  | 1 | TCLIA_B cell |
| 305 | 2.01E-19 | 0.251760962  | 0.976 | 0.973 | 4.39E-15    | RPS2     | 1 | TCLIA_B cell |
| 306 | 1.18E-06 | 0.251716974  | 0.216 | 0.404 | 0.025795888 | DNAJB6   | 1 | TCLIA_B cell |
| 307 | 1.19E-07 | 0.250267804  | 0.16  | 0.327 | 0.002585892 | NIPBL    | 1 | TCLIA_B cell |
| 308 | 3.52E-20 | -0.250257254 | 0.388 | 0.772 | 7.68E-16    | COX6C    | 1 | TCLIA_B cell |
| 309 | 6.84E-36 | -0.250932722 | 0.118 | 0.47  | 1.49E-31    | S100A10  | 1 | TCLIA_B cell |
| 310 | 6.69E-30 | -0.252711775 | 0.272 | 0.707 | 1.46E-25    | ZNF706   | 1 | TCLIA_B cell |
| 311 | 8.66E-23 | -0.2527966   | 0.346 | 0.768 | 1.89E-18    | NDUFB11  | 1 | TCLIA_B cell |
| 312 | 4.07E-46 | -0.253189041 | 0.147 | 0.596 | 8.87E-42    | TOP1     | 1 | TCLIA_B cell |
| 313 | 1.31E-45 | -0.253198973 | 0.118 | 0.536 | 2.85E-41    | CYC1     | 1 | TCLIA_B cell |
| 314 | 5.06E-33 | -0.25433657  | 0.256 | 0.702 | 1.10E-28    | FAM46C   | 1 | TCLIA_B cell |
| 315 | 8.92E-55 | -0.254464986 | 0.125 | 0.601 | 1.95E-50    | TMED5    | 1 | TCLIA_B cell |
| 316 | 2.44E-26 | -0.255960806 | 0.305 | 0.74  | 5.33E-22    | TCEB2    | 1 | TCLIA_B cell |
| 317 | 7.89E-30 | -0.258404481 | 0.253 | 0.676 | 1.72E-25    | ATP5J2   | 1 | TCLIA_B cell |
| 318 | 1.50E-40 | -0.259726086 | 0.174 | 0.614 | 3.27E-36    | PSMD8    | 1 | TCLIA_B cell |
| 319 | 4.70E-25 | -0.263852587 | 0.346 | 0.766 | 1.03E-20    | LSP1     | 1 | TCLIA_B cell |
| 320 | 3.92E-49 | -0.264046299 | 0.121 | 0.564 | 8.55E-45    | MRPL51   | 1 | TCLIA_B cell |
| 321 | 4.94E-36 | -0.266949232 | 0.998 | 0.998 | 1.08E-31    | B2M      | 1 | TCLIA_B cell |
| 322 | 2.98E-31 | -0.270060514 | 0.258 | 0.691 | 6.49E-27    | USMG5    | 1 | TCLIA_B cell |
| 323 | 2.49E-48 | -0.270555606 | 0.11  | 0.53  | 5.44E-44    | PSMA3    | 1 | TCLIA_B cell |
| 324 | 1.63E-53 | -0.273182096 | 0.132 | 0.608 | 3.55E-49    | RPS19BP1 | 1 | TCLIA_B cell |
| 325 | 2.09E-44 | -0.27466596  | 0.169 | 0.628 | 4.55E-40    | ATP5C1   | 1 | TCLIA_B cell |
| 326 | 9.43E-42 | -0.27882241  | 0.177 | 0.619 | 2.06E-37    | CDK2AP2  | 1 | TCLIA_B cell |
| 327 | 1.29E-52 | -0.279985672 | 0.101 | 0.54  | 2.82E-48    | PSMA5    | 1 | TCLIA_B cell |
| 328 | 1.12E-53 | -0.280321225 | 0.106 | 0.557 | 2.44E-49    | NDUFAF3  | 1 | TCLIA_B cell |
| 329 | 6.01E-54 | -0.28277526  | 0.13  | 0.607 | 1.31E-49    | MRPS34   | 1 | TCLIA_B cell |
| 330 | 1.25E-33 | -0.286600384 | 0.219 | 0.628 | 2.72E-29    | ENO1     | 1 | TCLIA_B cell |
| 331 | 5.28E-24 | -0.290033302 | 0.384 | 0.813 | 1.15E-19    | MT-ND6   | 1 | TCLIA_B cell |
| 332 | 2.11E-47 | -0.294570917 | 0.14  | 0.589 | 4.60E-43    | SRSF9    | 1 | TCLIA_B cell |
| 333 | 5.42E-40 | -0.295077405 | 0.216 | 0.692 | 1.18E-35    | GUK1     | 1 | TCLIA_B cell |
| 334 | 4.64E-35 | -0.295540293 | 0.224 | 0.651 | 1.01E-30    | ERH      | 1 | TCLIA_B cell |
| 335 | 1.31E-35 | -0.298094205 | 0.258 | 0.715 | 2.85E-31    | POLR2L   | 1 | TCLIA_B cell |
| 336 | 4.60E-28 | -0.29818925  | 0.312 | 0.727 | 1.00E-23    | TPI1     | 1 | TCLIA_B cell |
| 337 | 7.49E-38 | -0.30032745  | 0.207 | 0.647 | 1.63E-33    | NDUFV2   | 1 | TCLIA_B cell |
| 338 | 5.27E-34 | -0.301259527 | 0.258 | 0.71  | 1.15E-29    | CHCHD10  | 1 | TCLIA_B cell |
| 339 | 1.01E-17 | -0.305952852 | 0.895 | 0.973 | 2.20E-13    | HLA-A    | 1 | TCLIA_B cell |
| 340 | 1.29E-33 | -0.310641967 | 0.266 | 0.727 | 2.81E-29    | TMEM59   | 1 | TCLIA_B cell |
| 341 | 3.25E-59 | -0.311271732 | 0.116 | 0.607 | 7.09E-55    | NDUFA11  | 1 | TCLIA_B cell |
| 342 | 1.05E-39 | -0.316029321 | 0.212 | 0.675 | 2.30E-35    | PRDX5    | 1 | TCLIA_B cell |
| 343 | 3.30E-60 | -0.319555527 | 0.108 | 0.594 | 7.21E-56    | SDF4     | 1 | TCLIA_B cell |
| 344 | 1.23E-45 | -0.322311579 | 0.185 | 0.662 | 2.68E-41    | NDUFB4   | 1 | TCLIA_B cell |
| 345 | 2.88E-39 | -0.326297431 | 0.224 | 0.684 | 6.28E-35    | GNG5     | 1 | TCLIA_B cell |
| 346 | 4.80E-58 | -0.327936077 | 0.116 | 0.598 | 1.05E-53    | BSG      | 1 | TCLIA_B cell |
| 347 | 1.46E-58 | -0.3291519   | 0.103 | 0.575 | 3.18E-54    | NDUFAB1  | 1 | TCLIA_B cell |
| 348 | 2.45E-47 | -0.329530874 | 0.165 | 0.628 | 5.34E-43    | PSMB3    | 1 | TCLIA_B cell |
| 349 | 1.23E-23 | -0.330345165 | 0.371 | 0.749 | 2.69E-19    | RAN      | 1 | TCLIA_B cell |
| 350 | 6.61E-28 | -0.334699089 | 0.425 | 0.817 | 1.44E-23    | SSR2     | 1 | TCLIA_B cell |
| 351 | 1.03E-21 | -0.335055282 | 0.511 | 0.829 | 2.25E-17    | UQCRH    | 1 | TCLIA_B cell |
| 352 | 2.72E-12 | -0.338979733 | 0.617 | 0.894 | 5.92E-08    | SAT1     | 1 | TCLIA_B cell |

|     |          |              |       |       |          |          |   |              |
|-----|----------|--------------|-------|-------|----------|----------|---|--------------|
| 353 | 5.46E-53 | -0.340835405 | 0.143 | 0.621 | 1.19E-48 | TM9SF2   | 1 | TCL1A_B cell |
| 354 | 1.72E-37 | -0.345022748 | 0.266 | 0.746 | 3.74E-33 | NDUFA1   | 1 | TCL1A_B cell |
| 355 | 1.97E-33 | -0.345197736 | 0.322 | 0.775 | 4.30E-29 | PRDX1    | 1 | TCL1A_B cell |
| 356 | 1.27E-54 | -0.345474414 | 0.157 | 0.66  | 2.77E-50 | SELT     | 1 | TCL1A_B cell |
| 357 | 6.46E-27 | -0.351068616 | 0.452 | 0.82  | 1.41E-22 | OST4     | 1 | TCL1A_B cell |
| 358 | 4.72E-57 | -0.353560799 | 0.106 | 0.572 | 1.03E-52 | MRPS24   | 1 | TCL1A_B cell |
| 359 | 3.65E-34 | -0.356752961 | 0.285 | 0.732 | 7.96E-30 | PDIA3    | 1 | TCL1A_B cell |
| 360 | 2.10E-58 | -0.36499705  | 0.108 | 0.579 | 4.58E-54 | NDUFS6   | 1 | TCL1A_B cell |
| 361 | 7.90E-60 | -0.370710651 | 0.111 | 0.592 | 1.72E-55 | ARPC5L   | 1 | TCL1A_B cell |
| 362 | 6.57E-46 | -0.374441565 | 0.204 | 0.674 | 1.43E-41 | COX7B    | 1 | TCL1A_B cell |
| 363 | 4.20E-56 | -0.375465952 | 0.116 | 0.579 | 9.16E-52 | PPA1     | 1 | TCL1A_B cell |
| 364 | 1.14E-42 | -0.375497657 | 0.28  | 0.78  | 2.49E-38 | MCL1     | 1 | TCL1A_B cell |
| 365 | 9.74E-54 | -0.376849547 | 0.126 | 0.589 | 2.13E-49 | NDUFB6   | 1 | TCL1A_B cell |
| 366 | 2.22E-10 | -0.382392935 | 0.708 | 0.908 | 4.85E-06 | ACTG1    | 1 | TCL1A_B cell |
| 367 | 4.10E-31 | -0.383241499 | 0.4   | 0.792 | 8.95E-27 | COX6B1   | 1 | TCL1A_B cell |
| 368 | 1.04E-50 | -0.384794537 | 0.174 | 0.66  | 2.27E-46 | NDUFS5   | 1 | TCL1A_B cell |
| 369 | 1.75E-47 | -0.388578152 | 0.197 | 0.677 | 3.81E-43 | PEBP1    | 1 | TCL1A_B cell |
| 370 | 4.45E-47 | -0.388990015 | 0.199 | 0.682 | 9.71E-43 | ROMO1    | 1 | TCL1A_B cell |
| 371 | 2.95E-36 | -0.392379385 | 0.214 | 0.625 | 6.43E-32 | GSTP1    | 1 | TCL1A_B cell |
| 372 | 7.35E-33 | -0.394372398 | 0.464 | 0.836 | 1.60E-28 | RPL36AL  | 1 | TCL1A_B cell |
| 373 | 2.63E-63 | -0.399111126 | 0.105 | 0.597 | 5.73E-59 | SND1     | 1 | TCL1A_B cell |
| 374 | 3.02E-42 | -0.400396559 | 0.245 | 0.731 | 6.58E-38 | CD99     | 1 | TCL1A_B cell |
| 375 | 8.35E-56 | -0.401278766 | 0.115 | 0.579 | 1.82E-51 | ANAPC11  | 1 | TCL1A_B cell |
| 376 | 2.48E-33 | -0.402294711 | 0.366 | 0.779 | 5.40E-29 | COX7A2   | 1 | TCL1A_B cell |
| 377 | 9.78E-63 | -0.402434738 | 0.106 | 0.598 | 2.13E-58 | AURKAIP1 | 1 | TCL1A_B cell |
| 378 | 3.49E-39 | -0.407131217 | 0.273 | 0.743 | 7.61E-35 | KRTCAP2  | 1 | TCL1A_B cell |
| 379 | 2.90E-55 | -0.412536142 | 0.143 | 0.629 | 6.32E-51 | PSMB6    | 1 | TCL1A_B cell |
| 380 | 2.57E-52 | -0.417106637 | 0.148 | 0.618 | 5.60E-48 | ATP5G1   | 1 | TCL1A_B cell |
| 381 | 2.46E-38 | -0.417263908 | 0.297 | 0.747 | 5.37E-34 | NDUFA4   | 1 | TCL1A_B cell |
| 382 | 1.00E-32 | -0.417947739 | 0.417 | 0.821 | 2.19E-28 | COX6A1   | 1 | TCL1A_B cell |
| 383 | 1.90E-40 | -0.418579737 | 0.243 | 0.692 | 4.15E-36 | ATP5A1   | 1 | TCL1A_B cell |
| 384 | 3.27E-55 | -0.420776486 | 0.113 | 0.564 | 7.13E-51 | H2AFV    | 1 | TCL1A_B cell |
| 385 | 7.98E-25 | -0.420864695 | 0.659 | 0.884 | 1.74E-20 | RPS26    | 1 | TCL1A_B cell |
| 386 | 5.88E-55 | -0.42750285  | 0.17  | 0.678 | 1.28E-50 | ERGIC3   | 1 | TCL1A_B cell |
| 387 | 1.01E-50 | -0.439541657 | 0.838 | 0.979 | 2.20E-46 | HLA-C    | 1 | TCL1A_B cell |
| 388 | 2.37E-39 | -0.439633685 | 0.263 | 0.699 | 5.16E-35 | PIM2     | 1 | TCL1A_B cell |
| 389 | 3.42E-34 | -0.44466512  | 0.309 | 0.727 | 7.47E-30 | LDHA     | 1 | TCL1A_B cell |
| 390 | 2.65E-44 | -0.446979484 | 0.248 | 0.718 | 5.77E-40 | LDHB     | 1 | TCL1A_B cell |
| 391 | 5.55E-51 | -0.463282536 | 0.207 | 0.684 | 1.21E-46 | COX8A    | 1 | TCL1A_B cell |
| 392 | 9.93E-65 | -0.463730887 | 0.103 | 0.598 | 2.17E-60 | SEC13    | 1 | TCL1A_B cell |
| 393 | 1.27E-51 | -0.468973179 | 0.212 | 0.717 | 2.78E-47 | ARF4     | 1 | TCL1A_B cell |
| 394 | 3.51E-46 | -0.473800575 | 0.245 | 0.724 | 7.65E-42 | SELK     | 1 | TCL1A_B cell |
| 395 | 4.88E-42 | -0.477880892 | 0.376 | 0.807 | 1.06E-37 | TMBIM6   | 1 | TCL1A_B cell |
| 396 | 1.54E-50 | -0.47962129  | 0.216 | 0.694 | 3.36E-46 | ATP5J    | 1 | TCL1A_B cell |
| 397 | 2.10E-63 | -0.511355124 | 0.132 | 0.638 | 4.58E-59 | DERL1    | 1 | TCL1A_B cell |
| 398 | 5.96E-70 | -0.519662521 | 0.126 | 0.658 | 1.30E-65 | SRPRA    | 1 | TCL1A_B cell |
| 399 | 7.97E-62 | -0.522473026 | 0.206 | 0.757 | 1.74E-57 | PSAP     | 1 | TCL1A_B cell |
| 400 | 2.49E-72 | -0.524185496 | 0.101 | 0.626 | 5.43E-68 | ELL2     | 1 | TCL1A_B cell |
| 401 | 2.92E-65 | -0.525217455 | 0.123 | 0.632 | 6.36E-61 | PRDX2    | 1 | TCL1A_B cell |
| 402 | 1.34E-66 | -0.534643334 | 0.138 | 0.659 | 2.92E-62 | PRELID1  | 1 | TCL1A_B cell |
| 403 | 5.38E-62 | -0.536983449 | 0.167 | 0.675 | 1.17E-57 | PKM      | 1 | TCL1A_B cell |
| 404 | 2.45E-50 | -0.542177263 | 0.265 | 0.747 | 5.33E-46 | POU2AF1  | 1 | TCL1A_B cell |
| 405 | 9.59E-55 | -0.546117029 | 0.239 | 0.739 | 2.09E-50 | DAD1     | 1 | TCL1A_B cell |
| 406 | 2.23E-59 | -0.550487463 | 0.172 | 0.667 | 4.85E-55 | COX5A    | 1 | TCL1A_B cell |
| 407 | 4.08E-37 | -0.554341553 | 0.486 | 0.825 | 8.89E-33 | CHCHD2   | 1 | TCL1A_B cell |
| 408 | 1.39E-59 | -0.557951741 | 0.164 | 0.663 | 3.04E-55 | CANX     | 1 | TCL1A_B cell |
| 409 | 7.97E-49 | -0.566977703 | 0.373 | 0.803 | 1.74E-44 | NME2     | 1 | TCL1A_B cell |
| 410 | 1.56E-58 | -0.576094499 | 0.187 | 0.688 | 3.40E-54 | TMED2    | 1 | TCL1A_B cell |
| 411 | 6.05E-71 | -0.583125566 | 0.125 | 0.648 | 1.32E-66 | PGAM1    | 1 | TCL1A_B cell |
| 412 | 1.72E-67 | -0.585916045 | 0.143 | 0.666 | 3.76E-63 | SSR1     | 1 | TCL1A_B cell |
| 413 | 2.28E-56 | -0.596275719 | 0.214 | 0.702 | 4.97E-52 | TRAM1    | 1 | TCL1A_B cell |
| 414 | 2.87E-54 | -0.600612354 | 0.285 | 0.752 | 6.27E-50 | RABAC1   | 1 | TCL1A_B cell |
| 415 | 1.00E-84 | -0.605663448 | 0.103 | 0.68  | 2.19E-80 | VOPP1    | 1 | TCL1A_B cell |
| 416 | 5.51E-46 | -0.614805157 | 0.504 | 0.855 | 1.20E-41 | MIF      | 1 | TCL1A_B cell |
| 417 | 1.19E-59 | -0.64809184  | 0.233 | 0.725 | 2.59E-55 | ATP5G3   | 1 | TCL1A_B cell |
| 418 | 3.66E-55 | -0.653662852 | 0.297 | 0.777 | 7.99E-51 | MTDH     | 1 | TCL1A_B cell |
| 419 | 2.59E-66 | -0.655576053 | 0.202 | 0.728 | 5.65E-62 | COPE     | 1 | TCL1A_B cell |
| 420 | 1.55E-67 | -0.661188854 | 0.167 | 0.686 | 3.37E-63 | UQCQRQ   | 1 | TCL1A_B cell |
| 421 | 1.07E-69 | -0.675390751 | 0.172 | 0.707 | 2.34E-65 | TMED10   | 1 | TCL1A_B cell |
| 422 | 2.11E-75 | -0.680014491 | 0.135 | 0.679 | 4.60E-71 | KDELRL1  | 1 | TCL1A_B cell |
| 423 | 8.18E-66 | -0.694549657 | 0.162 | 0.66  | 1.78E-61 | PSME2    | 1 | TCL1A_B cell |

|     |           |              |       |       |             |           |   |                       |
|-----|-----------|--------------|-------|-------|-------------|-----------|---|-----------------------|
| 424 | 1.56E-64  | -0.698592856 | 0.283 | 0.776 | 3.41E-60    | TMEM258   | 1 | TCL1A_B cell          |
| 425 | 4.70E-77  | -0.701099078 | 0.327 | 0.869 | 1.02E-72    | SRGN      | 1 | TCL1A_B cell          |
| 426 | 3.39E-68  | -0.727050681 | 0.241 | 0.764 | 7.40E-64    | SPCS1     | 1 | TCL1A_B cell          |
| 427 | 2.97E-79  | -0.729804062 | 0.126 | 0.679 | 6.48E-75    | TMED9     | 1 | TCL1A_B cell          |
| 428 | 6.61E-55  | -0.732189817 | 0.543 | 0.895 | 1.44E-50    | VIM       | 1 | TCL1A_B cell          |
| 429 | 2.07E-78  | -0.75973197  | 0.133 | 0.674 | 4.51E-74    | DDOST     | 1 | TCL1A_B cell          |
| 430 | 1.49E-72  | -0.78365523  | 0.302 | 0.778 | 3.24E-68    | SPCS2     | 1 | TCL1A_B cell          |
| 431 | 4.11E-88  | -0.792296736 | 0.108 | 0.68  | 8.96E-84    | LMAN2     | 1 | TCL1A_B cell          |
| 432 | 2.64E-76  | -0.792483577 | 0.152 | 0.679 | 5.75E-72    | OSTC      | 1 | TCL1A_B cell          |
| 433 | 2.65E-32  | -0.818984758 | 0.212 | 0.559 | 5.78E-28    | HIST1H4C  | 1 | TCL1A_B cell          |
| 434 | 2.81E-66  | -0.84624481  | 0.344 | 0.808 | 6.14E-62    | CALR      | 1 | TCL1A_B cell          |
| 435 | 9.45E-35  | -0.850379475 | 0.194 | 0.539 | 2.06E-30    | CRIP1     | 1 | TCL1A_B cell          |
| 436 | 3.53E-89  | -0.909624853 | 0.126 | 0.683 | 7.70E-85    | RPN1      | 1 | TCL1A_B cell          |
| 437 | 5.83E-76  | -0.963742561 | 0.283 | 0.87  | 1.27E-71    | NEAT1     | 1 | TCL1A_B cell          |
| 438 | 2.24E-80  | -1.014667261 | 0.27  | 0.741 | 4.88E-76    | SEC61G    | 1 | TCL1A_B cell          |
| 439 | 1.18E-88  | -1.023274993 | 0.196 | 0.736 | 2.58E-84    | UBE2J1    | 1 | TCL1A_B cell          |
| 440 | 8.37E-93  | -1.029429778 | 0.116 | 0.672 | 1.83E-88    | KDEL2     | 1 | TCL1A_B cell          |
| 441 | 2.30E-95  | -1.040217689 | 0.121 | 0.684 | 5.01E-91    | RPN2      | 1 | TCL1A_B cell          |
| 442 | 4.48E-81  | -1.132019534 | 0.46  | 0.85  | 9.77E-77    | SUB1      | 1 | TCL1A_B cell          |
| 443 | 3.05E-67  | -1.136309282 | 0.13  | 0.588 | 6.64E-63    | IGLL5     | 1 | TCL1A_B cell          |
| 444 | 4.07E-101 | -1.162616253 | 0.153 | 0.724 | 8.88E-97    | PDIA6     | 1 | TCL1A_B cell          |
| 445 | 2.29E-103 | -1.175906209 | 0.256 | 0.786 | 5.00E-99    | SEC61B    | 1 | TCL1A_B cell          |
| 446 | 6.80E-107 | -1.235148425 | 0.118 | 0.703 | 1.48E-102   | P4HB      | 1 | TCL1A_B cell          |
| 447 | 9.35E-109 | -1.277682327 | 0.128 | 0.706 | 2.04E-104   | ITM2C     | 1 | TCL1A_B cell          |
| 448 | 2.11E-93  | -1.283020254 | 0.282 | 0.78  | 4.60E-89    | HSPA5     | 1 | TCL1A_B cell          |
| 449 | 1.70E-99  | -1.409247395 | 0.57  | 0.933 | 3.70E-95    | GAPDH     | 1 | TCL1A_B cell          |
| 450 | 4.89E-116 | -1.438036598 | 0.11  | 0.698 | 1.07E-111   | SSR3      | 1 | TCL1A_B cell          |
| 451 | 9.64E-117 | -1.579085134 | 0.346 | 0.813 | 2.10E-112   | SSR4      | 1 | TCL1A_B cell          |
| 452 | 4.11E-128 | -2.1082817   | 0.307 | 0.82  | 8.96E-124   | PPIB      | 1 | TCL1A_B cell          |
| 453 | 2.35E-131 | -2.244340179 | 0.331 | 0.835 | 5.12E-127   | HSP90B1   | 1 | TCL1A_B cell          |
| 454 | 8.60E-132 | -2.39742786  | 0.125 | 0.715 | 1.88E-127   | MZB1      | 1 | TCL1A_B cell          |
| 455 | 6.11E-76  | -3.141316134 | 0.324 | 0.699 | 1.33E-71    | IGKC      | 1 | TCL1A_B cell          |
| 456 | 3.43E-10  | -3.444368705 | 0.248 | 0.414 | 7.48E-06    | IGHV3-23  | 1 | TCL1A_B cell          |
| 457 | 3.36E-129 | -3.603727389 | 0.297 | 0.796 | 7.33E-125   | JCHAIN    | 1 | TCL1A_B cell          |
| 458 | 7.50E-07  | -3.619191278 | 0.159 | 0.279 | 0.016356591 | IGKV2-30  | 1 | TCL1A_B cell          |
| 459 | 3.56E-15  | -3.754724779 | 0.263 | 0.511 | 7.77E-11    | IGKV4-1   | 1 | TCL1A_B cell          |
| 460 | 2.28E-09  | -3.902188725 | 0.103 | 0.229 | 4.97E-05    | IGKV2-24  | 1 | TCL1A_B cell          |
| 461 | 4.91E-15  | -4.38886905  | 0.133 | 0.316 | 1.07E-10    | IGHV3-74  | 1 | TCL1A_B cell          |
| 462 | 1.46E-11  | -4.422941182 | 0.155 | 0.329 | 3.17E-07    | IGKV1D-16 | 1 | TCL1A_B cell          |
| 463 | 2.30E-20  | 3.032105972  | 0.438 | 0.211 | 5.02E-16    | IGKV1D-16 | 2 | IGKV1D-16_plasma cell |
| 464 | 1.05E-08  | 3.016093115  | 0.121 | 0.046 | 0.000229236 | IGKV3D-20 | 2 | IGKV1D-16_plasma cell |
| 465 | 2.37E-11  | 2.852721186  | 0.208 | 0.093 | 5.17E-07    | IGKV1-16  | 2 | IGKV1D-16_plasma cell |
| 466 | 7.03E-10  | 2.272105431  | 0.106 | 0.033 | 1.53E-05    | IGHV3-72  | 2 | IGKV1D-16_plasma cell |
| 467 | 1.47E-06  | 2.126379     | 0.152 | 0.078 | 0.032164325 | IGKV2D-28 | 2 | IGKV1D-16_plasma cell |
| 468 | 6.68E-08  | 2.12120103   | 0.248 | 0.134 | 0.001456238 | IGLV2-23  | 2 | IGKV1D-16_plasma cell |
| 469 | 2.23E-06  | 2.11467285   | 0.525 | 0.472 | 0.048705575 | IGHM      | 2 | IGKV1D-16_plasma cell |
| 470 | 2.27E-23  | 2.086959569  | 0.425 | 0.194 | 4.95E-19    | IGHV3-74  | 2 | IGKV1D-16_plasma cell |
| 471 | 2.03E-20  | 2.055296114  | 0.527 | 0.298 | 4.42E-16    | IGHV3-23  | 2 | IGKV1D-16_plasma cell |
| 472 | 1.86E-12  | 1.941416715  | 0.448 | 0.249 | 4.06E-08    | IGKV1-5   | 2 | IGKV1D-16_plasma cell |
| 473 | 2.19E-08  | 1.90728478   | 0.275 | 0.15  | 0.000476815 | IGHV3-7   | 2 | IGKV1D-16_plasma cell |
| 474 | 4.40E-34  | 1.776444211  | 0.504 | 0.204 | 9.60E-30    | IGKV1-12  | 2 | IGKV1D-16_plasma cell |
| 475 | 3.97E-170 | 1.768261265  | 0.992 | 0.5   | 8.66E-166   | JCHAIN    | 2 | IGKV1D-16_plasma cell |
| 476 | 1.47E-07  | 1.681521479  | 0.329 | 0.207 | 0.003206016 | IGKV2-30  | 2 | IGKV1D-16_plasma cell |
| 477 | 6.39E-35  | 1.656739128  | 0.452 | 0.192 | 1.39E-30    | IGHG2     | 2 | IGKV1D-16_plasma cell |
| 478 | 2.16E-11  | 1.575845656  | 0.146 | 0.052 | 4.70E-07    | IGKV2D-30 | 2 | IGKV1D-16_plasma cell |
| 479 | 7.58E-13  | 1.542495593  | 0.298 | 0.147 | 1.65E-08    | IGKV2-24  | 2 | IGKV1D-16_plasma cell |
| 480 | 7.53E-78  | 1.505113791  | 0.806 | 0.491 | 1.64E-73    | IGKC      | 2 | IGKV1D-16_plasma cell |
| 481 | 1.06E-22  | 1.487931347  | 0.508 | 0.251 | 2.31E-18    | IGHA1     | 2 | IGKV1D-16_plasma cell |
| 482 | 9.86E-16  | 1.48487467   | 0.608 | 0.364 | 2.15E-11    | IGKV4-1   | 2 | IGKV1D-16_plasma cell |
| 483 | 2.92E-175 | 1.443693835  | 0.996 | 0.347 | 6.38E-171   | MZB1      | 2 | IGKV1D-16_plasma cell |
| 484 | 2.53E-14  | 1.357954831  | 0.2   | 0.073 | 5.51E-10    | IGHA2     | 2 | IGKV1D-16_plasma cell |
| 485 | 5.61E-09  | 1.292585612  | 0.158 | 0.069 | 0.000122417 | IGKV2-28  | 2 | IGKV1D-16_plasma cell |
| 486 | 7.36E-127 | 1.203173108  | 0.992 | 0.55  | 1.61E-122   | HSP90B1   | 2 | IGKV1D-16_plasma cell |
| 487 | 1.39E-41  | 1.193414508  | 0.612 | 0.279 | 3.02E-37    | IGHG1     | 2 | IGKV1D-16_plasma cell |
| 488 | 2.06E-151 | 1.14566975   | 0.977 | 0.543 | 4.49E-147   | SSR4      | 2 | IGKV1D-16_plasma cell |
| 489 | 1.31E-06  | 1.145009227  | 0.14  | 0.065 | 0.028461757 | IGKV2-29  | 2 | IGKV1D-16_plasma cell |
| 490 | 5.34E-145 | 1.142869772  | 0.954 | 0.285 | 1.17E-140   | FKBP11    | 2 | IGKV1D-16_plasma cell |
| 491 | 1.49E-06  | 1.138965101  | 0.21  | 0.118 | 0.032537569 | IGHV6-1   | 2 | IGKV1D-16_plasma cell |
| 492 | 2.41E-11  | 1.10785252   | 0.138 | 0.046 | 5.26E-07    | IGKV1-6   | 2 | IGKV1D-16_plasma cell |
| 493 | 2.45E-09  | 1.09638899   | 0.177 | 0.077 | 5.34E-05    | IGKV1-27  | 2 | IGKV1D-16_plasma cell |
| 494 | 5.23E-119 | 1.093582551  | 0.992 | 0.526 | 1.14E-114   | PPIB      | 2 | IGKV1D-16_plasma cell |

|     |           |             |       |       |           |           |   |                       |
|-----|-----------|-------------|-------|-------|-----------|-----------|---|-----------------------|
| 495 | 3.38E-130 | 1.084643795 | 0.975 | 0.33  | 7.38E-126 | XBP1      | 2 | IGKV1D-16_plasma cell |
| 496 | 1.55E-120 | 1.019138796 | 0.954 | 0.305 | 3.38E-116 | MYDGF     | 2 | IGKV1D-16_plasma cell |
| 497 | 1.25E-136 | 1.006136044 | 0.952 | 0.286 | 2.72E-132 | DERL3     | 2 | IGKV1D-16_plasma cell |
| 498 | 4.26E-09  | 0.990768325 | 0.225 | 0.113 | 9.30E-05  | IGHG3     | 2 | IGKV1D-16_plasma cell |
| 499 | 5.49E-125 | 0.970410262 | 0.946 | 0.286 | 1.20E-120 | PDIA4     | 2 | IGKV1D-16_plasma cell |
| 500 | 3.24E-95  | 0.967162176 | 0.971 | 0.486 | 7.06E-91  | HSPA5     | 2 | IGKV1D-16_plasma cell |
| 501 | 4.43E-09  | 0.960862198 | 0.244 | 0.125 | 9.65E-05  | IGLV6-57  | 2 | IGKV1D-16_plasma cell |
| 502 | 2.54E-127 | 0.957590813 | 0.956 | 0.324 | 5.55E-123 | LMAN1     | 2 | IGKV1D-16_plasma cell |
| 503 | 1.86E-121 | 0.952283264 | 0.917 | 0.283 | 4.05E-117 | PRDX4     | 2 | IGKV1D-16_plasma cell |
| 504 | 1.77E-110 | 0.94179126  | 0.931 | 0.363 | 3.85E-106 | ITM2C     | 2 | IGKV1D-16_plasma cell |
| 505 | 1.06E-102 | 0.917324011 | 0.946 | 0.361 | 2.31E-98  | SEC11C    | 2 | IGKV1D-16_plasma cell |
| 506 | 2.63E-118 | 0.886668683 | 0.908 | 0.289 | 5.73E-114 | CD38      | 2 | IGKV1D-16_plasma cell |
| 507 | 1.41E-45  | 0.884300665 | 0.958 | 0.574 | 3.07E-41  | NEAT1     | 2 | IGKV1D-16_plasma cell |
| 508 | 3.56E-116 | 0.863597759 | 0.929 | 0.321 | 7.76E-112 | HM13      | 2 | IGKV1D-16_plasma cell |
| 509 | 3.30E-24  | 0.856883435 | 0.304 | 0.109 | 7.19E-20  | IGHG4     | 2 | IGKV1D-16_plasma cell |
| 510 | 5.89E-102 | 0.85572413  | 0.825 | 0.255 | 1.28E-97  | RRBP1     | 2 | IGKV1D-16_plasma cell |
| 511 | 2.31E-98  | 0.840920232 | 0.856 | 0.257 | 5.04E-94  | TXNDC5    | 2 | IGKV1D-16_plasma cell |
| 512 | 3.42E-102 | 0.835328893 | 0.946 | 0.343 | 7.46E-98  | SSR3      | 2 | IGKV1D-16_plasma cell |
| 513 | 3.84E-96  | 0.797484316 | 0.917 | 0.324 | 8.38E-92  | SPCS3     | 2 | IGKV1D-16_plasma cell |
| 514 | 3.86E-97  | 0.782263772 | 0.854 | 0.313 | 8.41E-93  | CD27      | 2 | IGKV1D-16_plasma cell |
| 515 | 1.63E-86  | 0.781670657 | 0.894 | 0.354 | 3.55E-82  | RPN2      | 2 | IGKV1D-16_plasma cell |
| 516 | 8.86E-87  | 0.768237371 | 0.848 | 0.286 | 1.93E-82  | IGLL5     | 2 | IGKV1D-16_plasma cell |
| 517 | 5.41E-92  | 0.757885502 | 0.817 | 0.253 | 1.18E-87  | TNFRSF17  | 2 | IGKV1D-16_plasma cell |
| 518 | 3.02E-95  | 0.726094592 | 0.879 | 0.287 | 6.58E-91  | HDLBP     | 2 | IGKV1D-16_plasma cell |
| 519 | 2.79E-93  | 0.718881829 | 0.879 | 0.311 | 6.08E-89  | ERLEC1    | 2 | IGKV1D-16_plasma cell |
| 520 | 4.22E-96  | 0.715164477 | 0.902 | 0.317 | 9.21E-92  | FKBP2     | 2 | IGKV1D-16_plasma cell |
| 521 | 2.11E-80  | 0.698349895 | 0.935 | 0.355 | 4.61E-76  | P4HB      | 2 | IGKV1D-16_plasma cell |
| 522 | 3.67E-98  | 0.690356503 | 0.9   | 0.295 | 8.00E-94  | VIMP      | 2 | IGKV1D-16_plasma cell |
| 523 | 1.51E-70  | 0.688304966 | 0.933 | 0.42  | 3.29E-66  | UBE2J1    | 2 | IGKV1D-16_plasma cell |
| 524 | 1.35E-95  | 0.685205747 | 0.715 | 0.2   | 2.94E-91  | ANKRD28   | 2 | IGKV1D-16_plasma cell |
| 525 | 6.99E-116 | 0.684690404 | 0.744 | 0.197 | 1.52E-111 | FNDC3B    | 2 | IGKV1D-16_plasma cell |
| 526 | 4.53E-89  | 0.672531168 | 0.906 | 0.285 | 9.88E-85  | SDF2L1    | 2 | IGKV1D-16_plasma cell |
| 527 | 2.14E-75  | 0.659068562 | 0.9   | 0.353 | 4.66E-71  | RPN1      | 2 | IGKV1D-16_plasma cell |
| 528 | 4.86E-65  | 0.651240584 | 0.912 | 0.398 | 1.06E-60  | PDIA6     | 2 | IGKV1D-16_plasma cell |
| 529 | 1.93E-72  | 0.631046102 | 0.881 | 0.355 | 4.22E-68  | DDOST     | 2 | IGKV1D-16_plasma cell |
| 530 | 1.30E-92  | 0.624041614 | 0.756 | 0.238 | 2.84E-88  | NUCB2     | 2 | IGKV1D-16_plasma cell |
| 531 | 6.42E-97  | 0.619989703 | 0.854 | 0.272 | 1.40E-92  | TXNDC11   | 2 | IGKV1D-16_plasma cell |
| 532 | 6.83E-77  | 0.612537238 | 0.904 | 0.34  | 1.49E-72  | LMAN2     | 2 | IGKV1D-16_plasma cell |
| 533 | 1.83E-90  | 0.598036385 | 0.733 | 0.221 | 3.99E-86  | PRDM1     | 2 | IGKV1D-16_plasma cell |
| 534 | 1.64E-67  | 0.590335845 | 0.89  | 0.342 | 3.57E-63  | KDEL2     | 2 | IGKV1D-16_plasma cell |
| 535 | 1.33E-72  | 0.590209884 | 0.698 | 0.239 | 2.89E-68  | LINC00152 | 2 | IGKV1D-16_plasma cell |
| 536 | 3.76E-58  | 0.571277081 | 0.938 | 0.474 | 8.21E-54  | RABAC1    | 2 | IGKV1D-16_plasma cell |
| 537 | 5.27E-54  | 0.552859996 | 0.94  | 0.492 | 1.15E-49  | SEC61B    | 2 | IGKV1D-16_plasma cell |
| 538 | 6.18E-78  | 0.537671384 | 0.84  | 0.28  | 1.35E-73  | SEC61A1   | 2 | IGKV1D-16_plasma cell |
| 539 | 9.82E-51  | 0.532827109 | 0.558 | 0.201 | 2.14E-46  | SLC7A5    | 2 | IGKV1D-16_plasma cell |
| 540 | 7.72E-60  | 0.52700367  | 0.894 | 0.352 | 1.68E-55  | TMED9     | 2 | IGKV1D-16_plasma cell |
| 541 | 3.02E-51  | 0.524104762 | 0.95  | 0.501 | 6.58E-47  | SPCS2     | 2 | IGKV1D-16_plasma cell |
| 542 | 1.95E-74  | 0.515732455 | 0.652 | 0.205 | 4.25E-70  | ZBP1      | 2 | IGKV1D-16_plasma cell |
| 543 | 2.31E-78  | 0.515008271 | 0.64  | 0.182 | 5.04E-74  | TRIB1     | 2 | IGKV1D-16_plasma cell |
| 544 | 8.68E-27  | 0.510032958 | 0.419 | 0.173 | 1.89E-22  | LINC01480 | 2 | IGKV1D-16_plasma cell |
| 545 | 6.50E-50  | 0.508210075 | 0.919 | 0.464 | 1.42E-45  | SEC61G    | 2 | IGKV1D-16_plasma cell |
| 546 | 4.14E-79  | 0.505457348 | 0.64  | 0.185 | 9.03E-75  | CHPF      | 2 | IGKV1D-16_plasma cell |
| 547 | 4.44E-54  | 0.503367792 | 0.879 | 0.369 | 9.68E-50  | OSTC      | 2 | IGKV1D-16_plasma cell |
| 548 | 2.23E-48  | 0.492018887 | 0.888 | 0.4   | 4.86E-44  | TMED10    | 2 | IGKV1D-16_plasma cell |
| 549 | 1.53E-61  | 0.489408684 | 0.821 | 0.318 | 3.34E-57  | ELL2      | 2 | IGKV1D-16_plasma cell |
| 550 | 2.64E-48  | 0.482356684 | 0.89  | 0.414 | 5.76E-44  | TRAM1     | 2 | IGKV1D-16_plasma cell |
| 551 | 6.01E-62  | 0.4793188   | 0.862 | 0.306 | 1.31E-57  | MANF      | 2 | IGKV1D-16_plasma cell |
| 552 | 2.91E-44  | 0.471198867 | 0.921 | 0.571 | 6.35E-40  | TMBIM6    | 2 | IGKV1D-16_plasma cell |
| 553 | 4.17E-78  | 0.469468634 | 0.771 | 0.251 | 9.09E-74  | SRPRB     | 2 | IGKV1D-16_plasma cell |
| 554 | 3.40E-70  | 0.467422443 | 0.729 | 0.244 | 7.41E-66  | CKAP4     | 2 | IGKV1D-16_plasma cell |
| 555 | 2.78E-53  | 0.466563234 | 0.91  | 0.426 | 6.07E-49  | FAM46C    | 2 | IGKV1D-16_plasma cell |
| 556 | 8.52E-55  | 0.464804293 | 0.923 | 0.448 | 1.86E-50  | PSAP      | 2 | IGKV1D-16_plasma cell |
| 557 | 8.30E-63  | 0.463933244 | 0.648 | 0.218 | 1.81E-58  | HYOU1     | 2 | IGKV1D-16_plasma cell |
| 558 | 1.56E-36  | 0.459725994 | 0.852 | 0.447 | 3.39E-32  | PIM2      | 2 | IGKV1D-16_plasma cell |
| 559 | 1.85E-77  | 0.455667719 | 0.783 | 0.231 | 4.03E-73  | AQP3      | 2 | IGKV1D-16_plasma cell |
| 560 | 1.10E-47  | 0.454348052 | 0.865 | 0.365 | 2.40E-43  | CANX      | 2 | IGKV1D-16_plasma cell |
| 561 | 8.58E-40  | 0.452573969 | 0.898 | 0.479 | 1.87E-35  | SPCS1     | 2 | IGKV1D-16_plasma cell |
| 562 | 1.17E-64  | 0.45036555  | 0.7   | 0.232 | 2.55E-60  | STT3A     | 2 | IGKV1D-16_plasma cell |
| 563 | 5.94E-78  | 0.444538819 | 0.683 | 0.207 | 1.30E-73  | SLAMF7    | 2 | IGKV1D-16_plasma cell |
| 564 | 7.06E-54  | 0.442221093 | 0.856 | 0.384 | 1.54E-49  | ERGIC3    | 2 | IGKV1D-16_plasma cell |
| 565 | 3.03E-37  | 0.441987694 | 0.76  | 0.37  | 6.61E-33  | LGALS1    | 2 | IGKV1D-16_plasma cell |

|     |          |             |       |       |          |              |   |                       |
|-----|----------|-------------|-------|-------|----------|--------------|---|-----------------------|
| 566 | 5.02E-62 | 0.441498691 | 0.517 | 0.146 | 1.09E-57 | ABCB9        | 2 | IGKV1D-16_plasma cell |
| 567 | 2.51E-35 | 0.437821113 | 0.944 | 0.655 | 5.47E-31 | ISG20        | 2 | IGKV1D-16_plasma cell |
| 568 | 1.29E-37 | 0.436563322 | 0.952 | 0.546 | 2.82E-33 | CALR         | 2 | IGKV1D-16_plasma cell |
| 569 | 4.17E-74 | 0.434301583 | 0.61  | 0.183 | 9.10E-70 | SIL1         | 2 | IGKV1D-16_plasma cell |
| 570 | 4.10E-54 | 0.431017981 | 0.84  | 0.337 | 8.93E-50 | DERL1        | 2 | IGKV1D-16_plasma cell |
| 571 | 1.96E-57 | 0.427975575 | 0.46  | 0.128 | 4.28E-53 | IGF1         | 2 | IGKV1D-16_plasma cell |
| 572 | 9.05E-61 | 0.425175421 | 0.696 | 0.241 | 1.97E-56 | SRM          | 2 | IGKV1D-16_plasma cell |
| 573 | 4.08E-60 | 0.425030422 | 0.694 | 0.245 | 8.89E-56 | IDH2         | 2 | IGKV1D-16_plasma cell |
| 574 | 1.69E-47 | 0.424183356 | 0.865 | 0.366 | 3.68E-43 | KDELR1       | 2 | IGKV1D-16_plasma cell |
| 575 | 2.58E-52 | 0.417749085 | 0.504 | 0.159 | 5.62E-48 | CCDC88A      | 2 | IGKV1D-16_plasma cell |
| 576 | 1.86E-45 | 0.416782825 | 0.819 | 0.36  | 4.05E-41 | SRPRA        | 2 | IGKV1D-16_plasma cell |
| 577 | 6.67E-44 | 0.407815974 | 0.852 | 0.362 | 1.46E-39 | SSR1         | 2 | IGKV1D-16_plasma cell |
| 578 | 1.98E-31 | 0.406815123 | 0.398 | 0.147 | 4.31E-27 | ATF5         | 2 | IGKV1D-16_plasma cell |
| 579 | 2.16E-63 | 0.406745745 | 0.758 | 0.269 | 4.70E-59 | SAR1B        | 2 | IGKV1D-16_plasma cell |
| 580 | 5.99E-61 | 0.403792794 | 0.719 | 0.248 | 1.31E-56 | LIME1        | 2 | IGKV1D-16_plasma cell |
| 581 | 9.99E-42 | 0.401011248 | 0.95  | 0.638 | 2.18E-37 | SUB1         | 2 | IGKV1D-16_plasma cell |
| 582 | 1.01E-59 | 0.400791708 | 0.517 | 0.152 | 2.20E-55 | RP11-16E12.. | 2 | IGKV1D-16_plasma cell |
| 583 | 2.82E-58 | 0.400784989 | 0.658 | 0.242 | 6.16E-54 | SEL1L        | 2 | IGKV1D-16_plasma cell |
| 584 | 1.04E-59 | 0.398285977 | 0.775 | 0.292 | 2.27E-55 | LRPAP1       | 2 | IGKV1D-16_plasma cell |
| 585 | 3.96E-50 | 0.393652533 | 0.458 | 0.145 | 8.64E-46 | ERN1         | 2 | IGKV1D-16_plasma cell |
| 586 | 2.37E-35 | 0.392208134 | 0.89  | 0.459 | 5.17E-31 | DAD1         | 2 | IGKV1D-16_plasma cell |
| 587 | 1.39E-51 | 0.390178803 | 0.794 | 0.302 | 3.02E-47 | DNAJB11      | 2 | IGKV1D-16_plasma cell |
| 588 | 6.94E-27 | 0.389478881 | 0.148 | 0.019 | 1.51E-22 | DNAAF1       | 2 | IGKV1D-16_plasma cell |
| 589 | 1.64E-62 | 0.388581848 | 0.681 | 0.244 | 3.58E-58 | CD59         | 2 | IGKV1D-16_plasma cell |
| 590 | 9.73E-54 | 0.386746654 | 0.746 | 0.295 | 2.12E-49 | SEC14L1      | 2 | IGKV1D-16_plasma cell |
| 591 | 5.39E-58 | 0.384643238 | 0.521 | 0.155 | 1.18E-53 | CPEB4        | 2 | IGKV1D-16_plasma cell |
| 592 | 1.61E-61 | 0.383305695 | 0.723 | 0.262 | 3.51E-57 | DNAJC1       | 2 | IGKV1D-16_plasma cell |
| 593 | 2.12E-65 | 0.382422194 | 0.669 | 0.24  | 4.63E-61 | FNDC3A       | 2 | IGKV1D-16_plasma cell |
| 594 | 3.69E-57 | 0.370666214 | 0.573 | 0.187 | 8.04E-53 | GAS6         | 2 | IGKV1D-16_plasma cell |
| 595 | 2.76E-35 | 0.370611302 | 0.854 | 0.402 | 6.01E-31 | TMED2        | 2 | IGKV1D-16_plasma cell |
| 596 | 2.52E-48 | 0.370248056 | 0.56  | 0.206 | 5.50E-44 | EDEM1        | 2 | IGKV1D-16_plasma cell |
| 597 | 4.25E-59 | 0.368654602 | 0.746 | 0.278 | 9.27E-55 | TMEM208      | 2 | IGKV1D-16_plasma cell |
| 598 | 9.29E-54 | 0.368638458 | 0.71  | 0.271 | 2.03E-49 | DNAJC3       | 2 | IGKV1D-16_plasma cell |
| 599 | 4.49E-52 | 0.364930452 | 0.577 | 0.201 | 9.80E-48 | SLC38A5      | 2 | IGKV1D-16_plasma cell |
| 600 | 1.18E-53 | 0.363512281 | 0.623 | 0.237 | 2.58E-49 | SPATS2       | 2 | IGKV1D-16_plasma cell |
| 601 | 4.82E-58 | 0.361262903 | 0.621 | 0.22  | 1.05E-53 | SLC44A1      | 2 | IGKV1D-16_plasma cell |
| 602 | 6.05E-53 | 0.359307355 | 0.794 | 0.356 | 1.32E-48 | SEL1L3       | 2 | IGKV1D-16_plasma cell |
| 603 | 2.05E-53 | 0.356800995 | 0.756 | 0.277 | 4.46E-49 | CRELD2       | 2 | IGKV1D-16_plasma cell |
| 604 | 2.45E-58 | 0.35466859  | 0.717 | 0.27  | 5.34E-54 | ALG5         | 2 | IGKV1D-16_plasma cell |
| 605 | 1.49E-34 | 0.352634307 | 0.91  | 0.425 | 3.24E-30 | COPE         | 2 | IGKV1D-16_plasma cell |
| 606 | 5.99E-55 | 0.350916162 | 0.673 | 0.26  | 1.31E-50 | ACADVL       | 2 | IGKV1D-16_plasma cell |
| 607 | 2.81E-44 | 0.35086388  | 0.565 | 0.214 | 6.13E-40 | SEC24D       | 2 | IGKV1D-16_plasma cell |
| 608 | 1.75E-49 | 0.343662624 | 0.565 | 0.206 | 3.82E-45 | MAN1A1       | 2 | IGKV1D-16_plasma cell |
| 609 | 2.05E-29 | 0.340094448 | 0.885 | 0.475 | 4.47E-25 | PDIA3        | 2 | IGKV1D-16_plasma cell |
| 610 | 1.95E-52 | 0.337045974 | 0.66  | 0.246 | 4.25E-48 | CALU         | 2 | IGKV1D-16_plasma cell |
| 611 | 5.30E-46 | 0.330584638 | 0.783 | 0.307 | 1.16E-41 | SEC13        | 2 | IGKV1D-16_plasma cell |
| 612 | 2.76E-27 | 0.328993555 | 0.892 | 0.477 | 6.01E-23 | POU2AF1      | 2 | IGKV1D-16_plasma cell |
| 613 | 6.84E-43 | 0.327222764 | 0.504 | 0.185 | 1.49E-38 | MIR4435-2HC  | 2 | IGKV1D-16_plasma cell |
| 614 | 5.81E-53 | 0.326753602 | 0.64  | 0.235 | 1.27E-48 | HSPA13       | 2 | IGKV1D-16_plasma cell |
| 615 | 1.17E-45 | 0.326681327 | 0.738 | 0.315 | 2.56E-41 | OS9          | 2 | IGKV1D-16_plasma cell |
| 616 | 1.70E-47 | 0.326531022 | 0.479 | 0.153 | 3.70E-43 | RHBDD1       | 2 | IGKV1D-16_plasma cell |
| 617 | 3.27E-32 | 0.326423717 | 0.317 | 0.098 | 7.12E-28 | CADM1        | 2 | IGKV1D-16_plasma cell |
| 618 | 6.12E-39 | 0.326102453 | 0.538 | 0.205 | 1.33E-34 | RP11-1070N1C | 2 | IGKV1D-16_plasma cell |
| 619 | 1.49E-30 | 0.325927624 | 0.875 | 0.432 | 3.25E-26 | ARF4         | 2 | IGKV1D-16_plasma cell |
| 620 | 5.74E-52 | 0.317928946 | 0.65  | 0.248 | 1.25E-47 | SLC38A10     | 2 | IGKV1D-16_plasma cell |
| 621 | 1.04E-45 | 0.315203738 | 0.373 | 0.099 | 2.26E-41 | CHST2        | 2 | IGKV1D-16_plasma cell |
| 622 | 7.95E-18 | 0.311412426 | 0.76  | 0.451 | 1.73E-13 | CITED2       | 2 | IGKV1D-16_plasma cell |
| 623 | 8.87E-48 | 0.309422846 | 0.606 | 0.234 | 1.93E-43 | SLC39A7      | 2 | IGKV1D-16_plasma cell |
| 624 | 9.72E-53 | 0.308165323 | 0.529 | 0.171 | 2.12E-48 | PDK1         | 2 | IGKV1D-16_plasma cell |
| 625 | 3.48E-28 | 0.305640289 | 0.538 | 0.246 | 7.58E-24 | RNF213       | 2 | IGKV1D-16_plasma cell |
| 626 | 9.31E-23 | 0.305300375 | 0.2   | 0.052 | 2.03E-18 | IGHJ4        | 2 | IGKV1D-16_plasma cell |
| 627 | 8.47E-25 | 0.303706964 | 0.352 | 0.144 | 1.85E-20 | CCR2         | 2 | IGKV1D-16_plasma cell |
| 628 | 6.56E-58 | 0.303346489 | 0.633 | 0.222 | 1.43E-53 | EDEM2        | 2 | IGKV1D-16_plasma cell |
| 629 | 7.54E-34 | 0.303139304 | 0.569 | 0.246 | 1.65E-29 | ITGB7        | 2 | IGKV1D-16_plasma cell |
| 630 | 1.75E-53 | 0.300479919 | 0.671 | 0.264 | 3.81E-49 | CTSD         | 2 | IGKV1D-16_plasma cell |
| 631 | 1.43E-44 | 0.297431687 | 0.521 | 0.187 | 3.12E-40 | SEC24A       | 2 | IGKV1D-16_plasma cell |
| 632 | 4.04E-32 | 0.297124685 | 0.629 | 0.289 | 8.81E-28 | TNFRSF13B    | 2 | IGKV1D-16_plasma cell |
| 633 | 3.51E-45 | 0.296840735 | 0.71  | 0.298 | 7.66E-41 | MGAT1        | 2 | IGKV1D-16_plasma cell |
| 634 | 1.54E-35 | 0.295523835 | 0.423 | 0.153 | 3.35E-31 | BIK          | 2 | IGKV1D-16_plasma cell |
| 635 | 7.94E-39 | 0.295307966 | 0.604 | 0.237 | 1.73E-34 | UAP1         | 2 | IGKV1D-16_plasma cell |
| 636 | 3.76E-44 | 0.290309034 | 0.435 | 0.141 | 8.20E-40 | KCNK6        | 2 | IGKV1D-16_plasma cell |















|      |          |             |       |       |             |            |   |               |
|------|----------|-------------|-------|-------|-------------|------------|---|---------------|
| 1063 | 5.65E-21 | 0.561507698 | 0.757 | 0.702 | 1.23E-16    | PPP1R15A   | 3 | GPR183_B cell |
| 1064 | 3.73E-15 | 0.55843918  | 0.519 | 0.348 | 8.13E-11    | LY9        | 3 | GPR183_B cell |
| 1065 | 5.52E-49 | 0.555535851 | 1     | 0.983 | 1.20E-44    | RPL39      | 3 | GPR183_B cell |
| 1066 | 5.46E-15 | 0.554096099 | 0.217 | 0.085 | 1.19E-10    | TNFSF9     | 3 | GPR183_B cell |
| 1067 | 1.40E-67 | 0.550022616 | 0.997 | 0.995 | 3.05E-63    | RPL11      | 3 | GPR183_B cell |
| 1068 | 1.55E-53 | 0.546448432 | 0.997 | 0.987 | 3.38E-49    | RPL34      | 3 | GPR183_B cell |
| 1069 | 2.66E-33 | 0.545524267 | 0.862 | 0.707 | 5.79E-29    | HLA-DRB5   | 3 | GPR183_B cell |
| 1070 | 8.33E-57 | 0.545045717 | 0.994 | 0.97  | 1.82E-52    | RPS25      | 3 | GPR183_B cell |
| 1071 | 2.94E-08 | 0.538439119 | 0.273 | 0.177 | 0.000640463 | MARCKS     | 3 | GPR183_B cell |
| 1072 | 1.17E-19 | 0.537235447 | 0.522 | 0.295 | 2.55E-15    | SYPL1      | 3 | GPR183_B cell |
| 1073 | 8.06E-28 | 0.536567429 | 0.742 | 0.449 | 1.76E-23    | SLC2A3     | 3 | GPR183_B cell |
| 1074 | 6.51E-43 | 0.534645792 | 1     | 0.987 | 1.42E-38    | ACTB       | 3 | GPR183_B cell |
| 1075 | 2.67E-48 | 0.532985634 | 0.997 | 0.984 | 5.82E-44    | RPL30      | 3 | GPR183_B cell |
| 1076 | 8.60E-37 | 0.531119832 | 0.909 | 0.847 | 1.88E-32    | YWHAZ      | 3 | GPR183_B cell |
| 1077 | 1.01E-14 | 0.5286895   | 0.431 | 0.27  | 2.20E-10    | EML4       | 3 | GPR183_B cell |
| 1078 | 4.90E-25 | 0.528376843 | 0.795 | 0.702 | 1.07E-20    | COMMD6     | 3 | GPR183_B cell |
| 1079 | 5.14E-08 | 0.525049575 | 0.484 | 0.425 | 0.001120585 | CMTM6      | 3 | GPR183_B cell |
| 1080 | 1.51E-31 | 0.521577546 | 0.372 | 0.106 | 3.30E-27    | KIAA0226L  | 3 | GPR183_B cell |
| 1081 | 2.18E-06 | 0.521558613 | 0.399 | 0.328 | 0.047649457 | HSPH1      | 3 | GPR183_B cell |
| 1082 | 5.37E-21 | 0.521036744 | 0.745 | 0.689 | 1.17E-16    | MYL12A     | 3 | GPR183_B cell |
| 1083 | 2.33E-26 | 0.519937113 | 0.326 | 0.098 | 5.09E-22    | TGIF1      | 3 | GPR183_B cell |
| 1084 | 2.23E-52 | 0.518805379 | 0.997 | 0.986 | 4.86E-48    | RPS27A     | 3 | GPR183_B cell |
| 1085 | 2.71E-58 | 0.518500508 | 0.997 | 0.986 | 5.92E-54    | RPS21      | 3 | GPR183_B cell |
| 1086 | 5.06E-17 | 0.517806778 | 0.264 | 0.103 | 1.10E-12    | NFATC1     | 3 | GPR183_B cell |
| 1087 | 1.72E-69 | 0.512924044 | 0.994 | 0.99  | 3.75E-65    | RPS15A     | 3 | GPR183_B cell |
| 1088 | 1.90E-11 | 0.512388335 | 0.545 | 0.486 | 4.13E-07    | MYL12B     | 3 | GPR183_B cell |
| 1089 | 2.77E-46 | 0.511161131 | 0.979 | 0.902 | 6.03E-42    | RPL38      | 3 | GPR183_B cell |
| 1090 | 4.68E-34 | 0.505803466 | 0.956 | 0.945 | 1.02E-29    | JUNB       | 3 | GPR183_B cell |
| 1091 | 1.96E-25 | 0.504142769 | 0.317 | 0.097 | 4.28E-21    | DEK        | 3 | GPR183_B cell |
| 1092 | 3.87E-28 | 0.499898229 | 0.249 | 0.055 | 8.44E-24    | SCIMP      | 3 | GPR183_B cell |
| 1093 | 1.24E-49 | 0.499865003 | 0.997 | 0.986 | 2.71E-45    | RPS23      | 3 | GPR183_B cell |
| 1094 | 6.15E-45 | 0.499812966 | 1     | 0.983 | 1.34E-40    | RPL32      | 3 | GPR183_B cell |
| 1095 | 1.82E-06 | 0.499474376 | 0.455 | 0.427 | 0.039611329 | ARL6IP5    | 3 | GPR183_B cell |
| 1096 | 1.73E-64 | 0.498086802 | 0.997 | 0.988 | 3.77E-60    | RPS3       | 3 | GPR183_B cell |
| 1097 | 5.88E-27 | 0.494909958 | 0.9   | 0.862 | 1.28E-22    | HSP90AB1   | 3 | GPR183_B cell |
| 1098 | 5.74E-14 | 0.494795861 | 0.525 | 0.378 | 1.25E-09    | EVI2B      | 3 | GPR183_B cell |
| 1099 | 3.54E-44 | 0.494498435 | 0.982 | 0.944 | 7.73E-40    | RPL9       | 3 | GPR183_B cell |
| 1100 | 1.30E-15 | 0.491457179 | 0.707 | 0.656 | 2.84E-11    | FUS        | 3 | GPR183_B cell |
| 1101 | 9.09E-63 | 0.491219188 | 0.997 | 0.987 | 1.98E-58    | RPS28      | 3 | GPR183_B cell |
| 1102 | 4.38E-46 | 0.49039448  | 0.988 | 0.959 | 9.54E-42    | RPL13A     | 3 | GPR183_B cell |
| 1103 | 7.32E-12 | 0.487255401 | 0.452 | 0.269 | 1.60E-07    | ID3        | 3 | GPR183_B cell |
| 1104 | 9.45E-56 | 0.480027804 | 1     | 0.988 | 2.06E-51    | RPS18      | 3 | GPR183_B cell |
| 1105 | 3.27E-24 | 0.479830968 | 0.927 | 0.86  | 7.13E-20    | ZFP36L2    | 3 | GPR183_B cell |
| 1106 | 5.09E-12 | 0.47728793  | 0.229 | 0.104 | 1.11E-07    | PEA15      | 3 | GPR183_B cell |
| 1107 | 1.52E-58 | 0.476090164 | 0.997 | 0.998 | 3.32E-54    | AC090498.1 | 3 | GPR183_B cell |
| 1108 | 2.12E-52 | 0.475899756 | 0.991 | 0.972 | 4.62E-48    | RPL36      | 3 | GPR183_B cell |
| 1109 | 9.73E-14 | 0.475421303 | 0.232 | 0.097 | 2.12E-09    | PVT1       | 3 | GPR183_B cell |
| 1110 | 3.13E-07 | 0.474243431 | 0.361 | 0.274 | 0.006834378 | FNBP1      | 3 | GPR183_B cell |
| 1111 | 3.26E-10 | 0.473533315 | 0.66  | 0.68  | 7.11E-06    | MEF2C      | 3 | GPR183_B cell |
| 1112 | 1.34E-32 | 0.472627257 | 0.921 | 0.85  | 2.93E-28    | RPL36A     | 3 | GPR183_B cell |
| 1113 | 1.69E-06 | 0.472019252 | 0.27  | 0.185 | 0.036796112 | RIC3       | 3 | GPR183_B cell |
| 1114 | 1.42E-29 | 0.471993322 | 0.886 | 0.85  | 3.10E-25    | HLA-E      | 3 | GPR183_B cell |
| 1115 | 6.84E-23 | 0.471544451 | 0.328 | 0.11  | 1.49E-18    | VPREB3     | 3 | GPR183_B cell |
| 1116 | 4.35E-57 | 0.467873789 | 0.997 | 0.972 | 9.48E-53    | RPL14      | 3 | GPR183_B cell |
| 1117 | 6.07E-09 | 0.466661128 | 0.261 | 0.151 | 0.000132444 | DDAH2      | 3 | GPR183_B cell |
| 1118 | 6.48E-25 | 0.466392272 | 0.308 | 0.09  | 1.41E-20    | SPIB       | 3 | GPR183_B cell |
| 1119 | 1.17E-50 | 0.464933365 | 0.994 | 0.975 | 2.56E-46    | RPS6       | 3 | GPR183_B cell |
| 1120 | 1.43E-69 | 0.46377884  | 1     | 0.997 | 3.11E-65    | RPLP1      | 3 | GPR183_B cell |
| 1121 | 3.16E-55 | 0.463456189 | 0.994 | 0.989 | 6.89E-51    | RPLP2      | 3 | GPR183_B cell |
| 1122 | 7.06E-13 | 0.462616313 | 0.457 | 0.295 | 1.54E-08    | SWAP70     | 3 | GPR183_B cell |
| 1123 | 3.39E-15 | 0.462230839 | 0.328 | 0.153 | 7.40E-11    | CYBB       | 3 | GPR183_B cell |
| 1124 | 2.63E-32 | 0.460039313 | 0.968 | 0.732 | 5.72E-28    | CD37       | 3 | GPR183_B cell |
| 1125 | 1.14E-10 | 0.459966248 | 0.557 | 0.471 | 2.49E-06    | GPSM3      | 3 | GPR183_B cell |
| 1126 | 3.16E-07 | 0.459295914 | 0.305 | 0.203 | 0.006894611 | NFKBID     | 3 | GPR183_B cell |
| 1127 | 4.84E-09 | 0.458631177 | 0.68  | 0.674 | 0.000105567 | TAGLN2     | 3 | GPR183_B cell |
| 1128 | 5.16E-11 | 0.454860218 | 0.748 | 0.757 | 1.13E-06    | NFKBIA     | 3 | GPR183_B cell |
| 1129 | 8.63E-47 | 0.453592248 | 0.991 | 0.968 | 1.88E-42    | RPL23A     | 3 | GPR183_B cell |
| 1130 | 5.04E-30 | 0.452245572 | 0.944 | 0.803 | 1.10E-25    | CXCR4      | 3 | GPR183_B cell |
| 1131 | 2.78E-28 | 0.451661792 | 0.947 | 0.841 | 6.07E-24    | TSC22D3    | 3 | GPR183_B cell |
| 1132 | 1.91E-09 | 0.449461369 | 0.528 | 0.448 | 4.17E-05    | UBXN1      | 3 | GPR183_B cell |
| 1133 | 3.99E-15 | 0.448421287 | 0.413 | 0.224 | 8.70E-11    | CD40       | 3 | GPR183_B cell |

|      |          |             |       |       |             |           |   |               |
|------|----------|-------------|-------|-------|-------------|-----------|---|---------------|
| 1134 | 7.27E-15 | 0.446658677 | 0.437 | 0.242 | 1.58E-10    | FCRLA     | 3 | GPR183_B cell |
| 1135 | 2.23E-09 | 0.445762591 | 0.616 | 0.607 | 4.87E-05    | EIF4A2    | 3 | GPR183_B cell |
| 1136 | 4.35E-11 | 0.445727114 | 0.625 | 0.578 | 9.49E-07    | PPDPF     | 3 | GPR183_B cell |
| 1137 | 4.33E-53 | 0.445600273 | 1     | 0.992 | 9.44E-49    | RPL28     | 3 | GPR183_B cell |
| 1138 | 1.93E-19 | 0.445585854 | 0.352 | 0.133 | 4.21E-15    | CXCR5     | 3 | GPR183_B cell |
| 1139 | 1.20E-07 | 0.444782386 | 0.44  | 0.345 | 0.002620524 | MAP3K8    | 3 | GPR183_B cell |
| 1140 | 5.60E-20 | 0.442359595 | 0.323 | 0.113 | 1.22E-15    | CCR7      | 3 | GPR183_B cell |
| 1141 | 3.45E-09 | 0.442255258 | 0.545 | 0.489 | 7.52E-05    | PTPN6     | 3 | GPR183_B cell |
| 1142 | 1.60E-07 | 0.442224228 | 0.37  | 0.251 | 0.003496096 | ZNF331    | 3 | GPR183_B cell |
| 1143 | 2.03E-27 | 0.441708213 | 0.906 | 0.869 | 4.43E-23    | DDX5      | 3 | GPR183_B cell |
| 1144 | 1.88E-08 | 0.441646861 | 0.56  | 0.528 | 0.000409473 | WSB1      | 3 | GPR183_B cell |
| 1145 | 3.63E-15 | 0.440160001 | 0.314 | 0.142 | 7.91E-11    | PARP14    | 3 | GPR183_B cell |
| 1146 | 3.03E-10 | 0.439294886 | 0.584 | 0.556 | 6.61E-06    | TPM3      | 3 | GPR183_B cell |
| 1147 | 1.58E-17 | 0.439024666 | 0.748 | 0.682 | 3.44E-13    | CALM2     | 3 | GPR183_B cell |
| 1148 | 9.34E-47 | 0.434057912 | 0.997 | 0.981 | 2.04E-42    | RPL3      | 3 | GPR183_B cell |
| 1149 | 5.72E-19 | 0.429656053 | 0.346 | 0.133 | 1.25E-14    | PARP15    | 3 | GPR183_B cell |
| 1150 | 1.62E-08 | 0.428962178 | 0.255 | 0.146 | 0.000354376 | RAB11FIP1 | 3 | GPR183_B cell |
| 1151 | 2.40E-44 | 0.428091719 | 0.988 | 0.975 | 5.22E-40    | RPL35A    | 3 | GPR183_B cell |
| 1152 | 3.74E-26 | 0.42718356  | 0.88  | 0.849 | 8.16E-22    | RPL27A    | 3 | GPR183_B cell |
| 1153 | 1.06E-43 | 0.426443486 | 1     | 1     | 2.31E-39    | MALAT1    | 3 | GPR183_B cell |
| 1154 | 6.79E-22 | 0.425460814 | 0.613 | 0.331 | 1.48E-17    | IRF8      | 3 | GPR183_B cell |
| 1155 | 4.17E-11 | 0.425075294 | 0.63  | 0.601 | 9.10E-07    | DAZAP2    | 3 | GPR183_B cell |
| 1156 | 1.21E-38 | 0.423896849 | 1     | 0.979 | 2.64E-34    | RPS3A     | 3 | GPR183_B cell |
| 1157 | 2.82E-21 | 0.423194165 | 0.452 | 0.183 | 6.15E-17    | 1-Mar     | 3 | GPR183_B cell |
| 1158 | 2.09E-39 | 0.422909444 | 0.994 | 0.976 | 4.57E-35    | RPL26     | 3 | GPR183_B cell |
| 1159 | 2.15E-08 | 0.422728369 | 0.326 | 0.213 | 0.000469527 | PRDM2     | 3 | GPR183_B cell |
| 1160 | 1.28E-07 | 0.421598489 | 0.519 | 0.469 | 0.002795003 | LCP1      | 3 | GPR183_B cell |
| 1161 | 3.25E-39 | 0.421236545 | 0.988 | 0.967 | 7.08E-35    | RPL17     | 3 | GPR183_B cell |
| 1162 | 3.90E-52 | 0.421166544 | 0.997 | 0.994 | 8.51E-48    | RPS8      | 3 | GPR183_B cell |
| 1163 | 2.18E-15 | 0.420549776 | 0.255 | 0.1   | 4.75E-11    | MBP       | 3 | GPR183_B cell |
| 1164 | 1.47E-15 | 0.417016074 | 0.777 | 0.801 | 3.20E-11    | PTPRCAP   | 3 | GPR183_B cell |
| 1165 | 1.57E-15 | 0.41577403  | 0.751 | 0.624 | 3.43E-11    | DDIT4     | 3 | GPR183_B cell |
| 1166 | 1.73E-11 | 0.414687566 | 0.628 | 0.551 | 3.77E-07    | HLA-DMA   | 3 | GPR183_B cell |
| 1167 | 4.60E-40 | 0.413091851 | 0.997 | 0.981 | 1.00E-35    | RPL37     | 3 | GPR183_B cell |
| 1168 | 1.16E-08 | 0.412872183 | 0.457 | 0.343 | 0.000253161 | DRAM2     | 3 | GPR183_B cell |
| 1169 | 4.62E-26 | 0.411780168 | 0.974 | 0.942 | 1.01E-21    | H3F3B     | 3 | GPR183_B cell |
| 1170 | 2.55E-45 | 0.41098485  | 1     | 0.988 | 5.56E-41    | FAU       | 3 | GPR183_B cell |
| 1171 | 7.61E-10 | 0.408935969 | 0.531 | 0.408 | 1.66E-05    | TNFAIP8   | 3 | GPR183_B cell |
| 1172 | 1.12E-49 | 0.408897878 | 0.997 | 0.984 | 2.44E-45    | TPT1      | 3 | GPR183_B cell |
| 1173 | 1.12E-12 | 0.408368316 | 0.551 | 0.396 | 2.44E-08    | CRIP1     | 3 | GPR183_B cell |
| 1174 | 1.02E-45 | 0.407872222 | 0.994 | 0.989 | 2.22E-41    | RPL19     | 3 | GPR183_B cell |
| 1175 | 5.68E-14 | 0.407157382 | 0.66  | 0.57  | 1.24E-09    | CD48      | 3 | GPR183_B cell |
| 1176 | 2.10E-32 | 0.405936438 | 0.982 | 0.962 | 4.58E-28    | EEF1B2    | 3 | GPR183_B cell |
| 1177 | 8.20E-17 | 0.403121506 | 0.466 | 0.23  | 1.79E-12    | TUBA1A    | 3 | GPR183_B cell |
| 1178 | 3.25E-19 | 0.39854699  | 0.786 | 0.691 | 7.09E-15    | GLTSCR2   | 3 | GPR183_B cell |
| 1179 | 3.91E-40 | 0.398521456 | 0.994 | 0.98  | 8.52E-36    | RPS10     | 3 | GPR183_B cell |
| 1180 | 1.17E-21 | 0.398083725 | 0.906 | 0.87  | 2.54E-17    | PFN1      | 3 | GPR183_B cell |
| 1181 | 3.06E-24 | 0.396996467 | 0.232 | 0.056 | 6.66E-20    | BCAS4     | 3 | GPR183_B cell |
| 1182 | 4.25E-34 | 0.395849622 | 0.997 | 0.994 | 9.27E-30    | RPL13     | 3 | GPR183_B cell |
| 1183 | 1.66E-07 | 0.395792552 | 0.135 | 0.059 | 0.003625321 | KLK1      | 3 | GPR183_B cell |
| 1184 | 2.74E-11 | 0.395011199 | 0.141 | 0.045 | 5.97E-07    | LDLRAD4   | 3 | GPR183_B cell |
| 1185 | 1.16E-38 | 0.394672062 | 0.994 | 0.966 | 2.54E-34    | RPL22     | 3 | GPR183_B cell |
| 1186 | 1.31E-31 | 0.391675125 | 0.968 | 0.928 | 2.87E-27    | RPL4      | 3 | GPR183_B cell |
| 1187 | 7.03E-36 | 0.391583816 | 0.985 | 0.964 | 1.53E-31    | NACA      | 3 | GPR183_B cell |
| 1188 | 1.10E-20 | 0.390355936 | 0.812 | 0.749 | 2.39E-16    | RPS4Y1    | 3 | GPR183_B cell |
| 1189 | 1.02E-32 | 0.385455657 | 0.988 | 0.952 | 2.23E-28    | RPSA      | 3 | GPR183_B cell |
| 1190 | 1.81E-09 | 0.383590872 | 0.566 | 0.469 | 3.95E-05    | SP100     | 3 | GPR183_B cell |
| 1191 | 1.65E-43 | 0.383012626 | 1     | 0.997 | 3.61E-39    | RPL10     | 3 | GPR183_B cell |
| 1192 | 2.10E-11 | 0.382439581 | 0.677 | 0.656 | 4.58E-07    | SF1       | 3 | GPR183_B cell |
| 1193 | 9.51E-24 | 0.381499332 | 0.962 | 0.948 | 2.07E-19    | MT-ND2    | 3 | GPR183_B cell |
| 1194 | 1.58E-17 | 0.380971611 | 0.361 | 0.148 | 3.45E-13    | LY86      | 3 | GPR183_B cell |
| 1195 | 3.99E-17 | 0.380620136 | 0.387 | 0.17  | 8.71E-13    | FAM65B    | 3 | GPR183_B cell |
| 1196 | 7.47E-22 | 0.379412759 | 0.903 | 0.77  | 1.63E-17    | DUSP1     | 3 | GPR183_B cell |
| 1197 | 1.61E-33 | 0.37830649  | 0.152 | 0.012 | 3.51E-29    | MCOLN2    | 3 | GPR183_B cell |
| 1198 | 1.08E-09 | 0.377294346 | 0.66  | 0.682 | 2.35E-05    | SMDT1     | 3 | GPR183_B cell |
| 1199 | 1.31E-28 | 0.377134308 | 0.991 | 0.881 | 2.85E-24    | BTG1      | 3 | GPR183_B cell |
| 1200 | 1.36E-06 | 0.376973069 | 0.519 | 0.491 | 0.029767178 | ST13      | 3 | GPR183_B cell |
| 1201 | 9.85E-28 | 0.376428284 | 0.956 | 0.801 | 2.15E-23    | LAPTM5    | 3 | GPR183_B cell |
| 1202 | 4.77E-18 | 0.376054227 | 0.232 | 0.07  | 1.04E-13    | TRAF5     | 3 | GPR183_B cell |
| 1203 | 3.09E-18 | 0.375551597 | 0.229 | 0.069 | 6.75E-14    | SESN3     | 3 | GPR183_B cell |
| 1204 | 9.81E-11 | 0.374512195 | 0.173 | 0.067 | 2.14E-06    | BBC3      | 3 | GPR183_B cell |



|      |          |             |       |       |             |          |   |               |
|------|----------|-------------|-------|-------|-------------|----------|---|---------------|
| 1205 | 1.31E-07 | 0.373907493 | 0.672 | 0.71  | 0.002863507 | RAC2     | 3 | GPR183_B cell |
| 1206 | 9.43E-28 | 0.372977073 | 0.927 | 0.88  | 2.06E-23    | RPL31    | 3 | GPR183_B cell |
| 1207 | 6.34E-10 | 0.371805416 | 0.387 | 0.245 | 1.38E-05    | SP110    | 3 | GPR183_B cell |
| 1208 | 6.44E-39 | 0.371247252 | 1     | 0.977 | 1.41E-34    | RPS13    | 3 | GPR183_B cell |
| 1209 | 4.47E-15 | 0.369621678 | 0.774 | 0.757 | 9.75E-11    | PNRC1    | 3 | GPR183_B cell |
| 1210 | 1.28E-11 | 0.369424066 | 0.721 | 0.676 | 2.79E-07    | ARHGDIB  | 3 | GPR183_B cell |
| 1211 | 7.09E-08 | 0.368273589 | 0.534 | 0.482 | 0.001545677 | NAP1L1   | 3 | GPR183_B cell |
| 1212 | 2.40E-23 | 0.367272813 | 0.915 | 0.909 | 5.24E-19    | PABPC1   | 3 | GPR183_B cell |
| 1213 | 9.67E-14 | 0.366973585 | 0.155 | 0.047 | 2.11E-09    | RAB31    | 3 | GPR183_B cell |
| 1214 | 7.22E-36 | 0.365523119 | 0.991 | 0.98  | 1.57E-31    | RPS16    | 3 | GPR183_B cell |
| 1215 | 8.24E-10 | 0.365261677 | 0.22  | 0.104 | 1.80E-05    | CAPG     | 3 | GPR183_B cell |
| 1216 | 1.59E-16 | 0.364880584 | 0.229 | 0.077 | 3.47E-12    | ALOX5    | 3 | GPR183_B cell |
| 1217 | 2.78E-38 | 0.363473257 | 0.994 | 0.992 | 6.06E-34    | RPS15    | 3 | GPR183_B cell |
| 1218 | 5.57E-07 | 0.358885618 | 0.572 | 0.588 | 0.012144128 | GPX4     | 3 | GPR183_B cell |
| 1219 | 1.17E-08 | 0.3584059   | 0.478 | 0.359 | 0.000255348 | SELL     | 3 | GPR183_B cell |
| 1220 | 1.92E-31 | 0.35713524  | 0.988 | 0.969 | 4.19E-27    | RPL5     | 3 | GPR183_B cell |
| 1221 | 5.53E-31 | 0.357120212 | 0.991 | 0.972 | 1.21E-26    | RPL21    | 3 | GPR183_B cell |
| 1222 | 3.76E-31 | 0.355433218 | 0.994 | 0.955 | 8.21E-27    | RPS11    | 3 | GPR183_B cell |
| 1223 | 2.11E-07 | 0.355143503 | 0.63  | 0.665 | 0.004601807 | RSRP1    | 3 | GPR183_B cell |
| 1224 | 2.78E-12 | 0.353837209 | 0.323 | 0.158 | 6.06E-08    | SNX9     | 3 | GPR183_B cell |
| 1225 | 8.37E-07 | 0.353416024 | 0.44  | 0.344 | 0.018244072 | ANKRD44  | 3 | GPR183_B cell |
| 1226 | 1.14E-07 | 0.35312038  | 0.238 | 0.132 | 0.002483539 | PTPN22   | 3 | GPR183_B cell |
| 1227 | 1.01E-29 | 0.352817215 | 0.994 | 0.974 | 2.20E-25    | EIF1     | 3 | GPR183_B cell |
| 1228 | 1.54E-29 | 0.352361752 | 0.997 | 0.969 | 3.35E-25    | RPL12    | 3 | GPR183_B cell |
| 1229 | 2.47E-09 | 0.352343624 | 0.686 | 0.656 | 5.39E-05    | CORO1A   | 3 | GPR183_B cell |
| 1230 | 7.30E-17 | 0.351725438 | 0.155 | 0.038 | 1.59E-12    | BHLHE40  | 3 | GPR183_B cell |
| 1231 | 6.64E-17 | 0.351678521 | 0.167 | 0.043 | 1.45E-12    | MNDA     | 3 | GPR183_B cell |
| 1232 | 7.90E-15 | 0.350863461 | 0.903 | 0.893 | 1.72E-10    | IER2     | 3 | GPR183_B cell |
| 1233 | 3.12E-15 | 0.349526344 | 0.76  | 0.761 | 6.80E-11    | CIRBP    | 3 | GPR183_B cell |
| 1234 | 3.64E-32 | 0.349097765 | 0.988 | 0.968 | 7.94E-28    | RPS9     | 3 | GPR183_B cell |
| 1235 | 1.95E-21 | 0.347333001 | 0.144 | 0.023 | 4.26E-17    | SIGLEC10 | 3 | GPR183_B cell |
| 1236 | 3.59E-25 | 0.347306493 | 0.982 | 0.972 | 7.83E-21    | MT-ND4   | 3 | GPR183_B cell |
| 1237 | 5.32E-20 | 0.343585402 | 0.889 | 0.839 | 1.16E-15    | BTF3     | 3 | GPR183_B cell |
| 1238 | 2.53E-14 | 0.343345616 | 0.903 | 0.827 | 5.52E-10    | ACTG1    | 3 | GPR183_B cell |
| 1239 | 1.31E-29 | 0.342848969 | 0.988 | 0.959 | 2.85E-25    | RPL10A   | 3 | GPR183_B cell |
| 1240 | 1.61E-07 | 0.341599329 | 0.622 | 0.624 | 0.003501817 | HNRNPC   | 3 | GPR183_B cell |
| 1241 | 3.13E-14 | 0.341483824 | 0.865 | 0.837 | 6.82E-10    | HSPA8    | 3 | GPR183_B cell |
| 1242 | 6.32E-18 | 0.34004633  | 0.821 | 0.778 | 1.38E-13    | CCNI     | 3 | GPR183_B cell |
| 1243 | 1.52E-13 | 0.33962217  | 0.264 | 0.109 | 3.31E-09    | BIN1     | 3 | GPR183_B cell |
| 1244 | 8.46E-32 | 0.338082382 | 0.988 | 0.968 | 1.84E-27    | RPL6     | 3 | GPR183_B cell |
| 1245 | 7.05E-18 | 0.335337628 | 0.85  | 0.819 | 1.54E-13    | PCBP2    | 3 | GPR183_B cell |
| 1246 | 1.78E-24 | 0.335240639 | 0.95  | 0.911 | 3.88E-20    | RPL27    | 3 | GPR183_B cell |
| 1247 | 4.70E-22 | 0.333667078 | 0.95  | 0.946 | 1.02E-17    | EEF2     | 3 | GPR183_B cell |
| 1248 | 5.05E-08 | 0.333011585 | 0.361 | 0.225 | 0.001101304 | AREG     | 3 | GPR183_B cell |
| 1249 | 5.05E-31 | 0.33113754  | 0.994 | 0.979 | 1.10E-26    | RPS7     | 3 | GPR183_B cell |
| 1250 | 2.70E-27 | 0.3285211   | 0.991 | 0.975 | 5.88E-23    | MT-ND1   | 3 | GPR183_B cell |
| 1251 | 4.63E-09 | 0.327618265 | 0.666 | 0.644 | 0.000100955 | PTGES3   | 3 | GPR183_B cell |
| 1252 | 1.37E-13 | 0.32428513  | 0.93  | 0.916 | 2.98E-09    | UBC      | 3 | GPR183_B cell |
| 1253 | 1.24E-30 | 0.323212919 | 0.997 | 0.979 | 2.71E-26    | RPL29    | 3 | GPR183_B cell |
| 1254 | 2.22E-07 | 0.322226592 | 0.238 | 0.133 | 0.004851112 | INPP5D   | 3 | GPR183_B cell |
| 1255 | 2.08E-09 | 0.322191823 | 0.173 | 0.073 | 4.53E-05    | TLR10    | 3 | GPR183_B cell |
| 1256 | 1.01E-11 | 0.320363477 | 0.783 | 0.798 | 2.20E-07    | RPL23    | 3 | GPR183_B cell |
| 1257 | 1.89E-07 | 0.318160292 | 0.61  | 0.626 | 0.00411139  | EIF3H    | 3 | GPR183_B cell |
| 1258 | 2.44E-11 | 0.317754805 | 0.246 | 0.111 | 5.32E-07    | BCL2     | 3 | GPR183_B cell |
| 1259 | 2.88E-26 | 0.313375027 | 0.994 | 0.979 | 6.28E-22    | HLA-B    | 3 | GPR183_B cell |
| 1260 | 4.05E-27 | 0.311499413 | 0.997 | 0.995 | 8.83E-23    | RPS19    | 3 | GPR183_B cell |
| 1261 | 5.17E-11 | 0.310255376 | 0.284 | 0.138 | 1.13E-06    | ALOX5AP  | 3 | GPR183_B cell |
| 1262 | 1.11E-12 | 0.308205105 | 0.862 | 0.843 | 2.42E-08    | HINT1    | 3 | GPR183_B cell |
| 1263 | 6.36E-10 | 0.308130217 | 0.739 | 0.749 | 1.39E-05    | UQCRB    | 3 | GPR183_B cell |
| 1264 | 6.73E-27 | 0.305238324 | 1     | 0.996 | 1.47E-22    | MT-ND3   | 3 | GPR183_B cell |
| 1265 | 4.73E-30 | 0.304986714 | 1     | 0.99  | 1.03E-25    | RPL18    | 3 | GPR183_B cell |
| 1266 | 7.00E-23 | 0.304036468 | 0.988 | 0.97  | 1.53E-18    | RPS2     | 3 | GPR183_B cell |
| 1267 | 6.12E-10 | 0.303633535 | 0.701 | 0.707 | 1.33E-05    | EIF3F    | 3 | GPR183_B cell |
| 1268 | 2.22E-25 | 0.301387731 | 0.979 | 0.953 | 4.84E-21    | UBA52    | 3 | GPR183_B cell |
| 1269 | 6.97E-30 | 0.300046229 | 0.997 | 0.985 | 1.52E-25    | RPS4X    | 3 | GPR183_B cell |
| 1270 | 5.38E-13 | 0.299389928 | 0.771 | 0.753 | 1.17E-08    | EIF3E    | 3 | GPR183_B cell |
| 1271 | 2.46E-09 | 0.298087451 | 0.346 | 0.194 | 5.37E-05    | TRBC2    | 3 | GPR183_B cell |
| 1272 | 2.61E-19 | 0.29727449  | 0.956 | 0.912 | 5.70E-15    | RPL7     | 3 | GPR183_B cell |
| 1273 | 2.86E-17 | 0.295355476 | 0.138 | 0.028 | 6.24E-13    | LRRK2    | 3 | GPR183_B cell |
| 1274 | 2.84E-21 | 0.295234595 | 0.974 | 0.946 | 6.20E-17    | RPL41    | 3 | GPR183_B cell |
| 1275 | 3.63E-09 | 0.294589243 | 0.37  | 0.213 | 7.91E-05    | EVL      | 3 | GPR183_B cell |

|      |          |              |       |       |             |         |   |               |
|------|----------|--------------|-------|-------|-------------|---------|---|---------------|
| 1276 | 4.23E-08 | 0.294223985  | 0.727 | 0.755 | 0.000923255 | TMA7    | 3 | GPR183_B cell |
| 1277 | 4.05E-12 | 0.292996266  | 0.39  | 0.192 | 8.82E-08    | TRIM22  | 3 | GPR183_B cell |
| 1278 | 4.27E-26 | 0.29113243   | 0.123 | 0.011 | 9.31E-22    | TFEC    | 3 | GPR183_B cell |
| 1279 | 3.50E-10 | 0.288302842  | 0.698 | 0.641 | 7.62E-06    | CD55    | 3 | GPR183_B cell |
| 1280 | 2.59E-18 | 0.287468018  | 0.83  | 0.572 | 5.66E-14    | TXNIP   | 3 | GPR183_B cell |
| 1281 | 8.97E-28 | 0.285616085  | 0.982 | 0.973 | 1.96E-23    | FTH1    | 3 | GPR183_B cell |
| 1282 | 4.24E-10 | 0.285150913  | 0.199 | 0.084 | 9.25E-06    | STAT6   | 3 | GPR183_B cell |
| 1283 | 9.09E-12 | 0.283587304  | 0.818 | 0.812 | 1.98E-07    | ATP5G2  | 3 | GPR183_B cell |
| 1284 | 2.06E-06 | 0.283567634  | 0.683 | 0.701 | 0.04487605  | ARPC2   | 3 | GPR183_B cell |
| 1285 | 5.17E-07 | 0.283448552  | 0.132 | 0.057 | 0.011270288 | HAGHL   | 3 | GPR183_B cell |
| 1286 | 1.02E-11 | 0.282824935  | 0.774 | 0.788 | 2.23E-07    | ARPC3   | 3 | GPR183_B cell |
| 1287 | 6.87E-08 | 0.282804134  | 0.196 | 0.096 | 0.001498192 | PDE7A   | 3 | GPR183_B cell |
| 1288 | 1.04E-07 | 0.282556646  | 0.636 | 0.655 | 0.002267961 | EIF4B   | 3 | GPR183_B cell |
| 1289 | 7.71E-11 | 0.281298975  | 0.416 | 0.225 | 1.68E-06    | LBH     | 3 | GPR183_B cell |
| 1290 | 6.54E-22 | 0.279007251  | 0.95  | 0.946 | 1.43E-17    | EEF1D   | 3 | GPR183_B cell |
| 1291 | 2.54E-16 | 0.278006501  | 0.152 | 0.036 | 5.53E-12    | KYNU    | 3 | GPR183_B cell |
| 1292 | 1.04E-09 | 0.276424183  | 0.229 | 0.102 | 2.27E-05    | ZEB2    | 3 | GPR183_B cell |
| 1293 | 3.17E-13 | 0.274499617  | 0.883 | 0.843 | 6.92E-09    | NPM1    | 3 | GPR183_B cell |
| 1294 | 3.13E-11 | 0.274454356  | 0.853 | 0.831 | 6.84E-07    | CFL1    | 3 | GPR183_B cell |
| 1295 | 2.08E-10 | 0.273972441  | 0.232 | 0.101 | 4.54E-06    | PAX5    | 3 | GPR183_B cell |
| 1296 | 3.31E-13 | 0.272549703  | 0.877 | 0.898 | 7.22E-09    | COX4I1  | 3 | GPR183_B cell |
| 1297 | 4.76E-16 | 0.271533008  | 0.941 | 0.891 | 1.04E-11    | EEF1G   | 3 | GPR183_B cell |
| 1298 | 2.30E-21 | 0.270757934  | 0.982 | 0.975 | 5.01E-17    | RPL37A  | 3 | GPR183_B cell |
| 1299 | 2.43E-07 | 0.26818957   | 0.545 | 0.412 | 0.005294508 | FCMR    | 3 | GPR183_B cell |
| 1300 | 5.18E-07 | 0.267504229  | 0.683 | 0.704 | 0.011300132 | SUMO2   | 3 | GPR183_B cell |
| 1301 | 1.69E-22 | 0.267012855  | 0.985 | 0.97  | 3.70E-18    | GNB2L1  | 3 | GPR183_B cell |
| 1302 | 1.33E-11 | 0.264600665  | 0.842 | 0.84  | 2.89E-07    | COX7C   | 3 | GPR183_B cell |
| 1303 | 6.96E-25 | 0.262747638  | 0.994 | 0.993 | 1.52E-20    | RPL8    | 3 | GPR183_B cell |
| 1304 | 1.86E-09 | 0.262065599  | 0.305 | 0.156 | 4.05E-05    | HLA-DMB | 3 | GPR183_B cell |
| 1305 | 3.77E-08 | 0.261358442  | 0.323 | 0.191 | 0.000821174 | UVRAG   | 3 | GPR183_B cell |
| 1306 | 2.47E-08 | 0.259372344  | 0.161 | 0.068 | 0.000538062 | AIM1    | 3 | GPR183_B cell |
| 1307 | 6.76E-10 | 0.25870495   | 0.83  | 0.793 | 1.47E-05    | SLC25A6 | 3 | GPR183_B cell |
| 1308 | 6.40E-09 | 0.255337518  | 0.109 | 0.034 | 0.000139529 | ADRBK2  | 3 | GPR183_B cell |
| 1309 | 9.97E-20 | 0.252633692  | 0.979 | 0.961 | 2.17E-15    | RPL24   | 3 | GPR183_B cell |
| 1310 | 5.06E-09 | 0.252478613  | 0.258 | 0.126 | 0.000110297 | PKIG    | 3 | GPR183_B cell |
| 1311 | 2.73E-22 | -0.25092441  | 0.114 | 0.438 | 5.95E-18    | COPB2   | 3 | GPR183_B cell |
| 1312 | 1.90E-19 | -0.252299111 | 0.126 | 0.428 | 4.15E-15    | NDUFC1  | 3 | GPR183_B cell |
| 1313 | 3.68E-13 | -0.253542326 | 0.24  | 0.515 | 8.02E-09    | ATP5G1  | 3 | GPR183_B cell |
| 1314 | 2.09E-15 | -0.265401156 | 0.276 | 0.58  | 4.55E-11    | PRDX5   | 3 | GPR183_B cell |
| 1315 | 4.25E-13 | -0.267017018 | 0.284 | 0.567 | 9.26E-09    | PSMB1   | 3 | GPR183_B cell |
| 1316 | 2.48E-22 | -0.269299008 | 0.141 | 0.487 | 5.41E-18    | LRPAP1  | 3 | GPR183_B cell |
| 1317 | 3.78E-17 | -0.269834665 | 0.191 | 0.5   | 8.25E-13    | SRSF9   | 3 | GPR183_B cell |
| 1318 | 3.20E-10 | -0.274714383 | 0.499 | 0.676 | 6.97E-06    | COX7A2  | 3 | GPR183_B cell |
| 1319 | 1.02E-25 | -0.275381983 | 0.106 | 0.456 | 2.23E-21    | ALG5    | 3 | GPR183_B cell |
| 1320 | 1.66E-16 | -0.276156612 | 0.22  | 0.533 | 3.62E-12    | CDK2AP2 | 3 | GPR183_B cell |
| 1321 | 1.98E-17 | -0.279384293 | 0.179 | 0.484 | 4.32E-13    | PPA1    | 3 | GPR183_B cell |
| 1322 | 3.28E-24 | -0.28192465  | 0.126 | 0.474 | 7.16E-20    | MGAT1   | 3 | GPR183_B cell |
| 1323 | 2.95E-21 | -0.282404544 | 0.123 | 0.439 | 6.42E-17    | GLRX    | 3 | GPR183_B cell |
| 1324 | 7.61E-17 | -0.287506093 | 0.188 | 0.481 | 1.66E-12    | ANAPC11 | 3 | GPR183_B cell |
| 1325 | 1.91E-23 | -0.288112188 | 0.135 | 0.481 | 4.16E-19    | SEC14L1 | 3 | GPR183_B cell |
| 1326 | 7.95E-13 | -0.290562685 | 0.326 | 0.586 | 1.73E-08    | ATP5J   | 3 | GPR183_B cell |
| 1327 | 5.00E-22 | -0.291517843 | 0.135 | 0.467 | 1.09E-17    | CISD2   | 3 | GPR183_B cell |
| 1328 | 5.09E-19 | -0.292001939 | 0.214 | 0.559 | 1.11E-14    | REEP5   | 3 | GPR183_B cell |
| 1329 | 1.90E-20 | -0.293182399 | 0.158 | 0.484 | 4.15E-16    | NDUFB7  | 3 | GPR183_B cell |
| 1330 | 3.01E-17 | -0.301533293 | 0.22  | 0.544 | 6.57E-13    | SRPRA   | 3 | GPR183_B cell |
| 1331 | 1.83E-06 | -0.302175111 | 0.17  | 0.303 | 0.039881858 | HMGB2   | 3 | GPR183_B cell |
| 1332 | 6.33E-19 | -0.306021464 | 0.182 | 0.496 | 1.38E-14    | NDUFB6  | 3 | GPR183_B cell |
| 1333 | 5.65E-22 | -0.306631191 | 0.173 | 0.527 | 1.23E-17    | DNAJB9  | 3 | GPR183_B cell |
| 1334 | 5.64E-21 | -0.310229694 | 0.141 | 0.458 | 1.23E-16    | CYC1    | 3 | GPR183_B cell |
| 1335 | 5.93E-08 | -0.31353701  | 0.619 | 0.735 | 0.001293538 | CHCHD2  | 3 | GPR183_B cell |
| 1336 | 3.36E-15 | -0.315159624 | 0.326 | 0.622 | 7.32E-11    | SELK    | 3 | GPR183_B cell |
| 1337 | 1.83E-11 | -0.320263992 | 0.534 | 0.724 | 3.99E-07    | SSR2    | 3 | GPR183_B cell |
| 1338 | 2.09E-23 | -0.328122281 | 0.141 | 0.483 | 4.57E-19    | MRPS24  | 3 | GPR183_B cell |
| 1339 | 9.60E-13 | -0.328860888 | 0.513 | 0.7   | 2.09E-08    | TMBIM6  | 3 | GPR183_B cell |
| 1340 | 3.28E-14 | -0.32951468  | 0.361 | 0.637 | 7.15E-10    | PDIA3   | 3 | GPR183_B cell |
| 1341 | 8.76E-15 | -0.330027999 | 0.32  | 0.604 | 1.91E-10    | ARF4    | 3 | GPR183_B cell |
| 1342 | 1.96E-09 | -0.333632125 | 0.754 | 0.823 | 4.27E-05    | RPS26   | 3 | GPR183_B cell |
| 1343 | 9.93E-15 | -0.334505931 | 0.375 | 0.638 | 2.16E-10    | KRTCAP2 | 3 | GPR183_B cell |
| 1344 | 5.81E-10 | -0.335573989 | 0.54  | 0.689 | 1.27E-05    | NME2    | 3 | GPR183_B cell |
| 1345 | 4.05E-16 | -0.338162633 | 0.317 | 0.622 | 8.83E-12    | POLR2L  | 3 | GPR183_B cell |
| 1346 | 2.26E-22 | -0.338178043 | 0.208 | 0.573 | 4.94E-18    | UFM1    | 3 | GPR183_B cell |

|      |          |              |       |       |            |          |   |               |
|------|----------|--------------|-------|-------|------------|----------|---|---------------|
| 1347 | 8.38E-13 | -0.342028565 | 0.39  | 0.634 | 1.83E-08   | POU2AF1  | 3 | GPR183_B cell |
| 1348 | 5.43E-12 | -0.367730042 | 0.355 | 0.602 | 1.18E-07   | PIM2     | 3 | GPR183_B cell |
| 1349 | 1.30E-09 | -0.375778808 | 0.677 | 0.753 | 2.83E-05   | MIF      | 3 | GPR183_B cell |
| 1350 | 1.43E-11 | -0.393195963 | 0.469 | 0.654 | 3.11E-07   | MTDH     | 3 | GPR183_B cell |
| 1351 | 5.87E-17 | -0.394072534 | 0.317 | 0.597 | 1.28E-12   | ATP5A1   | 3 | GPR183_B cell |
| 1352 | 2.50E-20 | -0.409066949 | 0.252 | 0.586 | 5.44E-16   | ROMO1    | 3 | GPR183_B cell |
| 1353 | 5.55E-22 | -0.414148776 | 0.235 | 0.575 | 1.21E-17   | ERGIC3   | 3 | GPR183_B cell |
| 1354 | 8.25E-20 | -0.420705806 | 0.246 | 0.564 | 1.80E-15   | COX5A    | 3 | GPR183_B cell |
| 1355 | 7.12E-20 | -0.429418922 | 0.188 | 0.497 | 1.55E-15   | TXN      | 3 | GPR183_B cell |
| 1356 | 5.56E-26 | -0.431409691 | 0.144 | 0.501 | 1.21E-21   | DNAJB11  | 3 | GPR183_B cell |
| 1357 | 1.20E-28 | -0.439188705 | 0.106 | 0.468 | 2.62E-24   | LRRC59   | 3 | GPR183_B cell |
| 1358 | 3.45E-16 | -0.441616207 | 0.425 | 0.63  | 7.53E-12   | SPCS1    | 3 | GPR183_B cell |
| 1359 | 2.18E-18 | -0.443543621 | 0.109 | 0.376 | 4.75E-14   | CCND2    | 3 | GPR183_B cell |
| 1360 | 3.36E-14 | -0.444678663 | 0.372 | 0.607 | 7.33E-10   | ATP5G3   | 3 | GPR183_B cell |
| 1361 | 8.63E-21 | -0.459554025 | 0.343 | 0.628 | 1.88E-16   | DAD1     | 3 | GPR183_B cell |
| 1362 | 7.80E-26 | -0.466122298 | 0.24  | 0.629 | 1.70E-21   | FAM46C   | 3 | GPR183_B cell |
| 1363 | 9.67E-08 | -0.469835927 | 0.109 | 0.243 | 0.00210917 | CLEC2B   | 3 | GPR183_B cell |
| 1364 | 1.31E-17 | -0.48092137  | 0.267 | 0.549 | 2.85E-13   | PSME2    | 3 | GPR183_B cell |
| 1365 | 1.89E-28 | -0.48208941  | 0.167 | 0.542 | 4.11E-24   | DERL1    | 3 | GPR183_B cell |
| 1366 | 4.47E-27 | -0.495884675 | 0.199 | 0.568 | 9.74E-23   | CANX     | 3 | GPR183_B cell |
| 1367 | 1.27E-34 | -0.497411062 | 0.1   | 0.504 | 2.76E-30   | TXNDC11  | 3 | GPR183_B cell |
| 1368 | 2.67E-23 | -0.499607068 | 0.267 | 0.583 | 5.81E-19   | TMED2    | 3 | GPR183_B cell |
| 1369 | 2.20E-25 | -0.50462574  | 0.208 | 0.56  | 4.80E-21   | SSR1     | 3 | GPR183_B cell |
| 1370 | 1.60E-30 | -0.509134121 | 0.132 | 0.528 | 3.48E-26   | ELL2     | 3 | GPR183_B cell |
| 1371 | 7.81E-24 | -0.521412711 | 0.252 | 0.576 | 1.70E-19   | UQCRQ    | 3 | GPR183_B cell |
| 1372 | 5.54E-25 | -0.5246997   | 0.211 | 0.555 | 1.21E-20   | GSTP1    | 3 | GPR183_B cell |
| 1373 | 6.10E-28 | -0.539774023 | 0.252 | 0.609 | 1.33E-23   | TRAM1    | 3 | GPR183_B cell |
| 1374 | 1.82E-27 | -0.549921354 | 0.214 | 0.566 | 3.97E-23   | KDELRL1  | 3 | GPR183_B cell |
| 1375 | 8.73E-26 | -0.55865588  | 0.29  | 0.616 | 1.90E-21   | COPE     | 3 | GPR183_B cell |
| 1376 | 5.30E-29 | -0.561164986 | 0.519 | 0.782 | 1.16E-24   | ISG20    | 3 | GPR183_B cell |
| 1377 | 1.46E-19 | -0.587138967 | 0.493 | 0.693 | 3.18E-15   | CALR     | 3 | GPR183_B cell |
| 1378 | 1.25E-28 | -0.611422622 | 0.243 | 0.597 | 2.73E-24   | TMED10   | 3 | GPR183_B cell |
| 1379 | 1.43E-26 | -0.615206918 | 0.399 | 0.663 | 3.12E-22   | TMEM258  | 3 | GPR183_B cell |
| 1380 | 1.94E-32 | -0.621063153 | 0.179 | 0.571 | 4.23E-28   | TMED9    | 3 | GPR183_B cell |
| 1381 | 1.84E-32 | -0.64949675  | 0.191 | 0.567 | 4.02E-28   | DDOST    | 3 | GPR183_B cell |
| 1382 | 1.37E-42 | -0.66037494  | 0.123 | 0.587 | 2.99E-38   | PLPP5    | 3 | GPR183_B cell |
| 1383 | 1.92E-36 | -0.675086255 | 0.129 | 0.541 | 4.20E-32   | ERLEC1   | 3 | GPR183_B cell |
| 1384 | 3.17E-40 | -0.694712718 | 0.117 | 0.557 | 6.91E-36   | FKBP2    | 3 | GPR183_B cell |
| 1385 | 2.58E-36 | -0.694722921 | 0.173 | 0.566 | 5.63E-32   | LMAN2    | 3 | GPR183_B cell |
| 1386 | 9.18E-35 | -0.702918245 | 0.378 | 0.678 | 2.00E-30   | SPCS2    | 3 | GPR183_B cell |
| 1387 | 9.50E-40 | -0.708937934 | 0.114 | 0.537 | 2.07E-35   | VIMP     | 3 | GPR183_B cell |
| 1388 | 4.15E-37 | -0.709468215 | 0.305 | 0.667 | 9.05E-33   | RABAC1   | 3 | GPR183_B cell |
| 1389 | 2.16E-35 | -0.756062171 | 0.202 | 0.576 | 4.71E-31   | OSTC     | 3 | GPR183_B cell |
| 1390 | 1.72E-40 | -0.757280563 | 0.109 | 0.536 | 3.74E-36   | MANF     | 3 | GPR183_B cell |
| 1391 | 2.05E-29 | -0.784852813 | 0.408 | 0.659 | 4.47E-25   | SEC61B   | 3 | GPR183_B cell |
| 1392 | 2.31E-31 | -0.786106061 | 0.293 | 0.619 | 5.04E-27   | UBE2J1   | 3 | GPR183_B cell |
| 1393 | 1.07E-38 | -0.796979302 | 0.176 | 0.575 | 2.33E-34   | RPN1     | 3 | GPR183_B cell |
| 1394 | 2.09E-34 | -0.804617384 | 0.211 | 0.566 | 4.56E-30   | RPN2     | 3 | GPR183_B cell |
| 1395 | 1.20E-28 | -0.873719496 | 0.592 | 0.751 | 2.62E-24   | SUB1     | 3 | GPR183_B cell |
| 1396 | 1.11E-44 | -0.887836442 | 0.135 | 0.565 | 2.43E-40   | HM13     | 3 | GPR183_B cell |
| 1397 | 6.98E-40 | -0.906701235 | 0.173 | 0.562 | 1.52E-35   | KDELRL2  | 3 | GPR183_B cell |
| 1398 | 2.63E-37 | -0.920281427 | 0.326 | 0.646 | 5.73E-33   | SEC61G   | 3 | GPR183_B cell |
| 1399 | 1.09E-34 | -0.930962391 | 0.27  | 0.598 | 2.37E-30   | PDIA6    | 3 | GPR183_B cell |
| 1400 | 2.56E-38 | -0.972976825 | 0.226 | 0.583 | 5.58E-34   | ITM2C    | 3 | GPR183_B cell |
| 1401 | 1.55E-47 | -1.049496971 | 0.126 | 0.566 | 3.37E-43   | SPCS3    | 3 | GPR183_B cell |
| 1402 | 9.98E-50 | -1.075885795 | 0.135 | 0.577 | 2.18E-45   | LMAN1    | 3 | GPR183_B cell |
| 1403 | 3.07E-50 | -1.174318723 | 0.167 | 0.59  | 6.68E-46   | P4HB     | 3 | GPR183_B cell |
| 1404 | 2.42E-41 | -1.185053829 | 0.381 | 0.67  | 5.28E-37   | HSPA5    | 3 | GPR183_B cell |
| 1405 | 1.46E-40 | -1.204617387 | 0.24  | 0.582 | 3.19E-36   | SEC11C   | 3 | GPR183_B cell |
| 1406 | 1.41E-52 | -1.307564424 | 0.152 | 0.586 | 3.08E-48   | SSR3     | 3 | GPR183_B cell |
| 1407 | 3.48E-53 | -1.453909303 | 0.431 | 0.712 | 7.58E-49   | SSR4     | 3 | GPR183_B cell |
| 1408 | 4.21E-53 | -1.497816923 | 0.114 | 0.564 | 9.18E-49   | MYDGF    | 3 | GPR183_B cell |
| 1409 | 1.91E-50 | -1.85162724  | 0.428 | 0.702 | 4.17E-46   | PPIB     | 3 | GPR183_B cell |
| 1410 | 3.66E-58 | -1.857637446 | 0.132 | 0.589 | 7.97E-54   | XBP1     | 3 | GPR183_B cell |
| 1411 | 1.62E-46 | -1.944662925 | 0.501 | 0.707 | 3.54E-42   | HSP90B1  | 3 | GPR183_B cell |
| 1412 | 3.13E-62 | -2.331669996 | 0.147 | 0.608 | 6.83E-58   | MZB1     | 3 | GPR183_B cell |
| 1413 | 1.28E-19 | -2.644616696 | 0.487 | 0.596 | 2.80E-15   | IGKC     | 3 | GPR183_B cell |
| 1414 | 1.23E-13 | -2.767347682 | 0.109 | 0.325 | 2.69E-09   | IGKV1-12 | 3 | GPR183_B cell |
| 1415 | 6.62E-39 | -2.91448055  | 0.457 | 0.672 | 1.44E-34   | JCHAIN   | 3 | GPR183_B cell |
| 1416 | 2.80E-16 | -3.136788905 | 0.188 | 0.41  | 6.10E-12   | IGHG1    | 3 | GPR183_B cell |
| 1417 | 4.93E-12 | -3.141923462 | 0.126 | 0.293 | 1.07E-07   | IGHG2    | 3 | GPR183_B cell |

|      |           |              |       |       |             |          |   |                      |
|------|-----------|--------------|-------|-------|-------------|----------|---|----------------------|
| 1418 | 2.52E-09  | -3.170180796 | 0.155 | 0.337 | 5.49E-05    | IGKV1-5  | 3 | GPR183_B cell        |
| 1419 | 2.54E-07  | -3.32719388  | 0.284 | 0.463 | 0.00555005  | IGKV4-1  | 3 | GPR183_B cell        |
| 1420 | 2.99E-08  | -3.565872179 | 0.229 | 0.39  | 0.000651549 | IGHV3-23 | 3 | GPR183_B cell        |
| 1421 | 1.33E-07  | -4.335588742 | 0.141 | 0.282 | 0.0028983   | IGHV3-74 | 3 | GPR183_B cell        |
| 1422 | 1.50E-107 | 1.950135993  | 0.923 | 0.364 | 3.27E-103   | HIST1H4C | 4 | HIST1H4C_plasma cell |
| 1423 | 4.90E-265 | 1.794701543  | 0.888 | 0.039 | 1.07E-260   | RRM2     | 4 | HIST1H4C_plasma cell |
| 1424 | 1.66E-124 | 1.632991625  | 1     | 0.782 | 3.63E-120   | GAPDH    | 4 | HIST1H4C_plasma cell |
| 1425 | 1.13E-171 | 1.385835262  | 0.95  | 0.165 | 2.47E-167   | HMGB2    | 4 | HIST1H4C_plasma cell |
| 1426 | 2.32E-31  | 1.380900946  | 0.375 | 0.103 | 5.06E-27    | IGHV6-1  | 4 | HIST1H4C_plasma cell |
| 1427 | 2.11E-119 | 1.299158913  | 1     | 0.674 | 4.60E-115   | SUB1     | 4 | HIST1H4C_plasma cell |
| 1428 | 4.66E-99  | 1.19969223   | 1     | 0.591 | 1.02E-94    | PPIB     | 4 | HIST1H4C_plasma cell |
| 1429 | 1.32E-118 | 1.197520318  | 0.954 | 0.282 | 2.88E-114   | AQP3     | 4 | HIST1H4C_plasma cell |
| 1430 | 3.98E-113 | 1.186455758  | 0.896 | 0.229 | 8.68E-109   | CCND2    | 4 | HIST1H4C_plasma cell |
| 1431 | 5.74E-08  | 1.174682976  | 0.317 | 0.165 | 0.001250784 | IGKV2-24 | 4 | HIST1H4C_plasma cell |
| 1432 | 8.75E-86  | 1.133780256  | 0.985 | 0.621 | 1.91E-81    | TUBA1B   | 4 | HIST1H4C_plasma cell |
| 1433 | 1.30E-243 | 1.131963959  | 0.861 | 0.045 | 2.83E-239   | TYMS     | 4 | HIST1H4C_plasma cell |
| 1434 | 3.92E-103 | 1.117189706  | 0.992 | 0.62  | 8.55E-99    | H2AFZ    | 4 | HIST1H4C_plasma cell |
| 1435 | 9.15E-115 | 1.109476456  | 0.988 | 0.36  | 2.00E-110   | SDF2L1   | 4 | HIST1H4C_plasma cell |
| 1436 | 2.37E-85  | 1.102243149  | 1     | 0.612 | 5.17E-81    | HSP90B1  | 4 | HIST1H4C_plasma cell |
| 1437 | 3.80E-110 | 1.098936233  | 0.988 | 0.517 | 8.29E-106   | SEC61G   | 4 | HIST1H4C_plasma cell |
| 1438 | 4.20E-113 | 1.081128875  | 0.996 | 0.428 | 9.17E-109   | P4HB     | 4 | HIST1H4C_plasma cell |
| 1439 | 3.60E-102 | 1.077031959  | 0.985 | 0.423 | 7.86E-98    | SSR3     | 4 | HIST1H4C_plasma cell |
| 1440 | 1.17E-106 | 1.069526349  | 0.981 | 0.414 | 2.56E-102   | PSME2    | 4 | HIST1H4C_plasma cell |
| 1441 | 2.21E-89  | 1.067871275  | 0.988 | 0.571 | 4.82E-85    | HMG2     | 4 | HIST1H4C_plasma cell |
| 1442 | 8.62E-102 | 1.06547995   | 0.961 | 0.325 | 1.88E-97    | TXNDC5   | 4 | HIST1H4C_plasma cell |
| 1443 | 2.31E-108 | 1.058756424  | 0.985 | 0.491 | 5.05E-104   | ATP5G3   | 4 | HIST1H4C_plasma cell |
| 1444 | 2.09E-108 | 1.05542212   | 0.988 | 0.548 | 4.56E-104   | SEC61B   | 4 | HIST1H4C_plasma cell |
| 1445 | 2.22E-95  | 1.053382889  | 0.977 | 0.394 | 4.84E-91    | MYDGF    | 4 | HIST1H4C_plasma cell |
| 1446 | 5.76E-82  | 1.047449834  | 0.988 | 0.42  | 1.26E-77    | XBP1     | 4 | HIST1H4C_plasma cell |
| 1447 | 2.94E-103 | 1.030468143  | 1     | 0.787 | 6.41E-99    | HMGB1    | 4 | HIST1H4C_plasma cell |
| 1448 | 1.56E-106 | 1.022954044  | 0.965 | 0.349 | 3.40E-102   | TXN      | 4 | HIST1H4C_plasma cell |
| 1449 | 1.13E-103 | 1.020854249  | 0.973 | 0.407 | 2.47E-99    | KDEL2    | 4 | HIST1H4C_plasma cell |
| 1450 | 3.58E-91  | 1.01765322   | 0.981 | 0.522 | 7.80E-87    | LDHA     | 4 | HIST1H4C_plasma cell |
| 1451 | 1.45E-96  | 1.007872528  | 0.985 | 0.46  | 3.17E-92    | PDIA6    | 4 | HIST1H4C_plasma cell |
| 1452 | 1.12E-187 | 1.002464616  | 0.923 | 0.115 | 2.43E-183   | PTTG1    | 4 | HIST1H4C_plasma cell |
| 1453 | 2.75E-92  | 0.99571157   | 0.985 | 0.563 | 6.00E-88    | RAN      | 4 | HIST1H4C_plasma cell |
| 1454 | 4.99E-89  | 0.981384264  | 0.992 | 0.437 | 1.09E-84    | SEC11C   | 4 | HIST1H4C_plasma cell |
| 1455 | 7.47E-77  | 0.972949151  | 0.965 | 0.487 | 1.63E-72    | TUBB     | 4 | HIST1H4C_plasma cell |
| 1456 | 2.25E-84  | 0.966213601  | 0.985 | 0.599 | 4.90E-80    | CALR     | 4 | HIST1H4C_plasma cell |
| 1457 | 7.00E-93  | 0.961663727  | 0.992 | 0.666 | 1.53E-88    | CHCHD2   | 4 | HIST1H4C_plasma cell |
| 1458 | 1.11E-92  | 0.953837419  | 0.988 | 0.373 | 2.43E-88    | PDIA4    | 4 | HIST1H4C_plasma cell |
| 1459 | 8.67E-100 | 0.951562187  | 0.969 | 0.392 | 1.89E-95    | PGAM1    | 4 | HIST1H4C_plasma cell |
| 1460 | 3.22E-118 | 0.947898579  | 0.969 | 0.321 | 7.03E-114   | H2AFV    | 4 | HIST1H4C_plasma cell |
| 1461 | 9.24E-90  | 0.935673958  | 1     | 0.695 | 2.02E-85    | MIF      | 4 | HIST1H4C_plasma cell |
| 1462 | 1.99E-100 | 0.934289899  | 0.973 | 0.318 | 4.33E-96    | STMN1    | 4 | HIST1H4C_plasma cell |
| 1463 | 7.83E-91  | 0.928789341  | 0.985 | 0.398 | 1.71E-86    | SPCS3    | 4 | HIST1H4C_plasma cell |
| 1464 | 4.99E-222 | 0.916142809  | 0.741 | 0.026 | 1.09E-217   | CDC20    | 4 | HIST1H4C_plasma cell |
| 1465 | 2.68E-94  | 0.913029576  | 0.973 | 0.426 | 5.85E-90    | OSTC     | 4 | HIST1H4C_plasma cell |
| 1466 | 1.69E-91  | 0.908958697  | 0.988 | 0.78  | 3.69E-87    | RPS26    | 4 | HIST1H4C_plasma cell |
| 1467 | 3.53E-80  | 0.908127998  | 0.988 | 0.556 | 7.71E-76    | MTDH     | 4 | HIST1H4C_plasma cell |
| 1468 | 5.50E-96  | 0.905941902  | 0.977 | 0.367 | 1.20E-91    | MANF     | 4 | HIST1H4C_plasma cell |
| 1469 | 3.93E-98  | 0.902740917  | 0.996 | 0.433 | 8.58E-94    | UQCRCQ   | 4 | HIST1H4C_plasma cell |
| 1470 | 7.20E-98  | 0.901910433  | 0.973 | 0.424 | 1.57E-93    | COX5A    | 4 | HIST1H4C_plasma cell |
| 1471 | 1.47E-85  | 0.898477912  | 0.996 | 0.483 | 3.21E-81    | UBE2J1   | 4 | HIST1H4C_plasma cell |
| 1472 | 2.76E-78  | 0.889046694  | 0.977 | 0.525 | 6.02E-74    | TPI1     | 4 | HIST1H4C_plasma cell |
| 1473 | 2.93E-90  | 0.879559826  | 0.992 | 0.549 | 6.40E-86    | TMEM258  | 4 | HIST1H4C_plasma cell |
| 1474 | 1.81E-90  | 0.877004304  | 0.961 | 0.453 | 3.94E-86    | COX8A    | 4 | HIST1H4C_plasma cell |
| 1475 | 9.18E-225 | 0.868336373  | 0.73  | 0.022 | 2.00E-220   | UBE2C    | 4 | HIST1H4C_plasma cell |
| 1476 | 8.84E-93  | 0.856287678  | 0.988 | 0.481 | 1.93E-88    | COPE     | 4 | HIST1H4C_plasma cell |
| 1477 | 6.10E-167 | 0.853231841  | 0.892 | 0.12  | 1.33E-162   | SMC4     | 4 | HIST1H4C_plasma cell |
| 1478 | 4.17E-81  | 0.84838334   | 0.969 | 0.429 | 9.10E-77    | PKM      | 4 | HIST1H4C_plasma cell |
| 1479 | 1.99E-123 | 0.839701371  | 0.954 | 0.245 | 4.34E-119   | HN1      | 4 | HIST1H4C_plasma cell |
| 1480 | 1.37E-105 | 0.837568624  | 0.946 | 0.307 | 2.98E-101   | LRRC59   | 4 | HIST1H4C_plasma cell |
| 1481 | 4.14E-88  | 0.834083642  | 0.946 | 0.312 | 9.03E-84    | TNFRSF17 | 4 | HIST1H4C_plasma cell |
| 1482 | 6.30E-83  | 0.834036019  | 0.977 | 0.446 | 1.37E-78    | SNRPG    | 4 | HIST1H4C_plasma cell |
| 1483 | 2.16E-86  | 0.818992974  | 0.988 | 0.46  | 4.72E-82    | ATP5J    | 4 | HIST1H4C_plasma cell |
| 1484 | 4.36E-239 | 0.809667666  | 0.807 | 0.033 | 9.50E-235   | KIAA0101 | 4 | HIST1H4C_plasma cell |
| 1485 | 1.06E-81  | 0.803630362  | 0.985 | 0.418 | 2.31E-77    | RPN1     | 4 | HIST1H4C_plasma cell |
| 1486 | 1.07E-74  | 0.800600192  | 0.996 | 0.604 | 2.34E-70    | NME2     | 4 | HIST1H4C_plasma cell |
| 1487 | 2.60E-241 | 0.798516642  | 0.869 | 0.043 | 5.66E-237   | MKI67    | 4 | HIST1H4C_plasma cell |
| 1488 | 6.52E-207 | 0.79637913   | 0.846 | 0.067 | 1.42E-202   | MYBL2    | 4 | HIST1H4C_plasma cell |

|      |           |             |       |       |           |             |   |                      |
|------|-----------|-------------|-------|-------|-----------|-------------|---|----------------------|
| 1489 | 3.06E-102 | 0.795111132 | 0.911 | 0.24  | 6.67E-98  | FABP5       | 4 | HIST1H4C_plasma cell |
| 1490 | 7.93E-79  | 0.792758402 | 0.973 | 0.412 | 1.73E-74  | ENO1        | 4 | HIST1H4C_plasma cell |
| 1491 | 5.69E-58  | 0.792011844 | 0.992 | 0.44  | 1.24E-53  | MZB1        | 4 | HIST1H4C_plasma cell |
| 1492 | 5.99E-75  | 0.791459525 | 0.985 | 0.411 | 1.31E-70  | LMAN1       | 4 | HIST1H4C_plasma cell |
| 1493 | 2.58E-69  | 0.789925165 | 0.981 | 0.554 | 5.63E-65  | HSPA5       | 4 | HIST1H4C_plasma cell |
| 1494 | 1.88E-83  | 0.789568239 | 0.965 | 0.407 | 4.09E-79  | PRELID1     | 4 | HIST1H4C_plasma cell |
| 1495 | 2.28E-91  | 0.787167105 | 0.873 | 0.229 | 4.98E-87  | DUT         | 4 | HIST1H4C_plasma cell |
| 1496 | 1.17E-70  | 0.784060035 | 0.969 | 0.494 | 2.56E-66  | LDHB        | 4 | HIST1H4C_plasma cell |
| 1497 | 4.00E-87  | 0.78346123  | 0.992 | 0.636 | 8.72E-83  | COX6A1      | 4 | HIST1H4C_plasma cell |
| 1498 | 2.21E-151 | 0.783151464 | 0.923 | 0.157 | 4.82E-147 | GGH         | 4 | HIST1H4C_plasma cell |
| 1499 | 3.90E-79  | 0.781233869 | 0.992 | 0.607 | 8.49E-75  | COX6B1      | 4 | HIST1H4C_plasma cell |
| 1500 | 4.05E-87  | 0.776514663 | 0.88  | 0.257 | 8.84E-83  | HMGA1       | 4 | HIST1H4C_plasma cell |
| 1501 | 1.39E-81  | 0.764768019 | 0.954 | 0.38  | 3.03E-77  | ATP5G1      | 4 | HIST1H4C_plasma cell |
| 1502 | 3.09E-79  | 0.763746001 | 0.985 | 0.56  | 6.73E-75  | SPCS2       | 4 | HIST1H4C_plasma cell |
| 1503 | 1.05E-11  | 0.754538478 | 0.672 | 0.388 | 2.30E-07  | IGKV4-1     | 4 | HIST1H4C_plasma cell |
| 1504 | 4.58E-23  | 0.753665097 | 0.749 | 0.371 | 9.99E-19  | CRIP1       | 4 | HIST1H4C_plasma cell |
| 1505 | 1.69E-94  | 0.752569544 | 0.954 | 0.336 | 3.69E-90  | ANAPC11     | 4 | HIST1H4C_plasma cell |
| 1506 | 3.56E-70  | 0.750663244 | 0.969 | 0.419 | 7.76E-66  | RPN2        | 4 | HIST1H4C_plasma cell |
| 1507 | 2.36E-205 | 0.748667803 | 0.822 | 0.056 | 5.14E-201 | NUSAP1      | 4 | HIST1H4C_plasma cell |
| 1508 | 2.24E-77  | 0.748354091 | 0.977 | 0.442 | 4.89E-73  | COX7B       | 4 | HIST1H4C_plasma cell |
| 1509 | 4.24E-88  | 0.746355656 | 0.954 | 0.337 | 9.26E-84  | PPA1        | 4 | HIST1H4C_plasma cell |
| 1510 | 2.19E-63  | 0.745615909 | 0.973 | 0.438 | 4.78E-59  | ITM2C       | 4 | HIST1H4C_plasma cell |
| 1511 | 7.88E-126 | 0.741749262 | 0.876 | 0.168 | 1.72E-121 | C12orf75    | 4 | HIST1H4C_plasma cell |
| 1512 | 1.71E-93  | 0.74093223  | 0.923 | 0.275 | 3.73E-89  | RANBP1      | 4 | HIST1H4C_plasma cell |
| 1513 | 3.68E-73  | 0.737391281 | 0.977 | 0.471 | 8.03E-69  | ATP5A1      | 4 | HIST1H4C_plasma cell |
| 1514 | 9.28E-112 | 0.735758597 | 0.95  | 0.254 | 2.02E-107 | CALM3       | 4 | HIST1H4C_plasma cell |
| 1515 | 2.37E-68  | 0.734631373 | 0.992 | 0.679 | 5.17E-64  | UQCRH       | 4 | HIST1H4C_plasma cell |
| 1516 | 5.03E-68  | 0.727515344 | 0.996 | 0.91  | 1.10E-63  | PPIA        | 4 | HIST1H4C_plasma cell |
| 1517 | 1.21E-79  | 0.725202418 | 0.969 | 0.42  | 2.65E-75  | NDUFS5      | 4 | HIST1H4C_plasma cell |
| 1518 | 4.07E-62  | 0.719662479 | 0.985 | 0.376 | 8.88E-58  | FKBP11      | 4 | HIST1H4C_plasma cell |
| 1519 | 1.28E-74  | 0.719566354 | 0.981 | 0.409 | 2.80E-70  | LMAN2       | 4 | HIST1H4C_plasma cell |
| 1520 | 5.14E-63  | 0.716127749 | 0.985 | 0.598 | 1.12E-58  | SLC25A5     | 4 | HIST1H4C_plasma cell |
| 1521 | 1.87E-77  | 0.714132483 | 0.977 | 0.412 | 4.08E-73  | SSR1        | 4 | HIST1H4C_plasma cell |
| 1522 | 6.96E-81  | 0.713627981 | 0.969 | 0.392 | 1.52E-76  | PSMB3       | 4 | HIST1H4C_plasma cell |
| 1523 | 3.32E-76  | 0.71228127  | 0.973 | 0.422 | 7.25E-72  | NDUFV2      | 4 | HIST1H4C_plasma cell |
| 1524 | 2.38E-94  | 0.709336903 | 0.931 | 0.3   | 5.19E-90  | PRDX3       | 4 | HIST1H4C_plasma cell |
| 1525 | 8.33E-87  | 0.708090922 | 0.961 | 0.34  | 1.82E-82  | SEC61A1     | 4 | HIST1H4C_plasma cell |
| 1526 | 3.15E-38  | 0.708019324 | 0.992 | 0.817 | 6.86E-34  | ACTG1       | 4 | HIST1H4C_plasma cell |
| 1527 | 2.00E-70  | 0.70669571  | 0.985 | 0.365 | 4.36E-66  | CD38        | 4 | HIST1H4C_plasma cell |
| 1528 | 9.91E-68  | 0.706395858 | 0.961 | 0.422 | 2.16E-63  | KDELRL1     | 4 | HIST1H4C_plasma cell |
| 1529 | 4.44E-71  | 0.70397335  | 0.973 | 0.416 | 9.69E-67  | TMED9       | 4 | HIST1H4C_plasma cell |
| 1530 | 7.86E-79  | 0.703704487 | 0.977 | 0.377 | 1.71E-74  | PRDX2       | 4 | HIST1H4C_plasma cell |
| 1531 | 1.33E-71  | 0.693005689 | 0.969 | 0.433 | 2.90E-67  | ERH         | 4 | HIST1H4C_plasma cell |
| 1532 | 6.15E-68  | 0.692736342 | 0.911 | 0.357 | 1.34E-63  | IGLL5       | 4 | HIST1H4C_plasma cell |
| 1533 | 6.43E-99  | 0.69179138  | 0.95  | 0.29  | 1.40E-94  | PSMB2       | 4 | HIST1H4C_plasma cell |
| 1534 | 6.38E-99  | 0.691588407 | 0.938 | 0.265 | 1.39E-94  | SRM         | 4 | HIST1H4C_plasma cell |
| 1535 | 1.24E-81  | 0.690809243 | 0.958 | 0.345 | 2.70E-77  | DNAJB11     | 4 | HIST1H4C_plasma cell |
| 1536 | 1.40E-204 | 0.6890414   | 0.749 | 0.038 | 3.06E-200 | DHFR        | 4 | HIST1H4C_plasma cell |
| 1537 | 4.37E-97  | 0.686272213 | 0.95  | 0.305 | 9.52E-93  | CYC1        | 4 | HIST1H4C_plasma cell |
| 1538 | 7.23E-66  | 0.684284589 | 0.961 | 0.449 | 1.58E-61  | TMED2       | 4 | HIST1H4C_plasma cell |
| 1539 | 2.29E-67  | 0.679873582 | 0.973 | 0.415 | 5.00E-63  | DDOST       | 4 | HIST1H4C_plasma cell |
| 1540 | 1.56E-56  | 0.676114469 | 0.981 | 0.614 | 3.41E-52  | ALDOA       | 4 | HIST1H4C_plasma cell |
| 1541 | 6.58E-119 | 0.67530349  | 0.9   | 0.192 | 1.43E-114 | β11-1070N1C | 4 | HIST1H4C_plasma cell |
| 1542 | 1.45E-63  | 0.672725958 | 0.969 | 0.552 | 3.15E-59  | ATP5B       | 4 | HIST1H4C_plasma cell |
| 1543 | 4.41E-100 | 0.672347081 | 0.934 | 0.281 | 9.61E-96  | MLEC        | 4 | HIST1H4C_plasma cell |
| 1544 | 5.89E-246 | 0.671198816 | 0.83  | 0.031 | 1.28E-241 | BIRC5       | 4 | HIST1H4C_plasma cell |
| 1545 | 2.03E-66  | 0.670629892 | 0.969 | 0.37  | 4.43E-62  | VIMP        | 4 | HIST1H4C_plasma cell |
| 1546 | 3.29E-61  | 0.670076282 | 0.965 | 0.402 | 7.18E-57  | HM13        | 4 | HIST1H4C_plasma cell |
| 1547 | 2.99E-91  | 0.669943918 | 0.934 | 0.284 | 6.51E-87  | ANXA2       | 4 | HIST1H4C_plasma cell |
| 1548 | 3.73E-221 | 0.669811347 | 0.788 | 0.036 | 8.13E-217 | TK1         | 4 | HIST1H4C_plasma cell |
| 1549 | 2.70E-56  | 0.669437445 | 0.981 | 0.526 | 5.89E-52  | SPCS1       | 4 | HIST1H4C_plasma cell |
| 1550 | 2.66E-233 | 0.667461157 | 0.803 | 0.034 | 5.80E-229 | SHCBP1      | 4 | HIST1H4C_plasma cell |
| 1551 | 1.23E-80  | 0.667206932 | 0.954 | 0.349 | 2.69E-76  | NDUFB6      | 4 | HIST1H4C_plasma cell |
| 1552 | 2.06E-66  | 0.666456347 | 0.965 | 0.464 | 4.50E-62  | ATP5J2      | 4 | HIST1H4C_plasma cell |
| 1553 | 5.13E-80  | 0.662415701 | 0.946 | 0.348 | 1.12E-75  | SEC13       | 4 | HIST1H4C_plasma cell |
| 1554 | 2.00E-84  | 0.657653565 | 0.942 | 0.35  | 4.37E-80  | AURKAIP1    | 4 | HIST1H4C_plasma cell |
| 1555 | 1.61E-72  | 0.65315353  | 0.958 | 0.386 | 3.52E-68  | PSMB6       | 4 | HIST1H4C_plasma cell |
| 1556 | 8.36E-71  | 0.652000144 | 0.923 | 0.349 | 1.82E-66  | C1QBP       | 4 | HIST1H4C_plasma cell |
| 1557 | 6.28E-50  | 0.64949294  | 0.981 | 0.781 | 1.37E-45  | YBX1        | 4 | HIST1H4C_plasma cell |
| 1558 | 5.50E-64  | 0.649491986 | 0.985 | 0.534 | 1.20E-59  | NDUFA4      | 4 | HIST1H4C_plasma cell |
| 1559 | 4.63E-110 | 0.649201259 | 0.861 | 0.205 | 1.01E-105 | NME1        | 4 | HIST1H4C_plasma cell |

|      |           |             |       |       |             |           |   |                      |
|------|-----------|-------------|-------|-------|-------------|-----------|---|----------------------|
| 1560 | 2.84E-68  | 0.646845109 | 0.992 | 0.666 | 6.20E-64    | RPL36AL   | 4 | HIST1H4C_plasma cell |
| 1561 | 4.78E-89  | 0.646290591 | 0.954 | 0.329 | 1.04E-84    | NDUFAB1   | 4 | HIST1H4C_plasma cell |
| 1562 | 2.86E-53  | 0.645136263 | 0.973 | 0.523 | 6.24E-49    | POU2AF1   | 4 | HIST1H4C_plasma cell |
| 1563 | 9.24E-67  | 0.64504719  | 0.985 | 0.585 | 2.01E-62    | COX7A2    | 4 | HIST1H4C_plasma cell |
| 1564 | 1.07E-86  | 0.644079026 | 0.915 | 0.273 | 2.34E-82    | MTHFD2    | 4 | HIST1H4C_plasma cell |
| 1565 | 4.42E-243 | 0.644073318 | 0.873 | 0.042 | 9.64E-239   | MAD2L1    | 4 | HIST1H4C_plasma cell |
| 1566 | 7.21E-213 | 0.643493893 | 0.761 | 0.034 | 1.57E-208   | CDKN3     | 4 | HIST1H4C_plasma cell |
| 1567 | 1.23E-88  | 0.641952852 | 0.876 | 0.244 | 2.68E-84    | UAP1      | 4 | HIST1H4C_plasma cell |
| 1568 | 6.36E-60  | 0.641677069 | 0.969 | 0.456 | 1.39E-55    | TMED10    | 4 | HIST1H4C_plasma cell |
| 1569 | 3.12E-107 | 0.641192104 | 0.927 | 0.249 | 6.81E-103   | GMPPB     | 4 | HIST1H4C_plasma cell |
| 1570 | 2.32E-198 | 0.638731701 | 0.826 | 0.062 | 5.06E-194   | FEN1      | 4 | HIST1H4C_plasma cell |
| 1571 | 8.88E-89  | 0.63839525  | 0.969 | 0.331 | 1.94E-84    | NDUFS6    | 4 | HIST1H4C_plasma cell |
| 1572 | 2.33E-62  | 0.637830832 | 0.992 | 0.504 | 5.08E-58    | DAD1      | 4 | HIST1H4C_plasma cell |
| 1573 | 3.02E-72  | 0.637230589 | 0.977 | 0.356 | 6.59E-68    | HDLBP     | 4 | HIST1H4C_plasma cell |
| 1574 | 9.63E-91  | 0.636733043 | 0.938 | 0.303 | 2.10E-86    | NDUFA6    | 4 | HIST1H4C_plasma cell |
| 1575 | 2.08E-63  | 0.636124956 | 0.985 | 0.493 | 4.54E-59    | POLR2L    | 4 | HIST1H4C_plasma cell |
| 1576 | 1.38E-64  | 0.634958285 | 0.961 | 0.42  | 3.02E-60    | CANX      | 4 | HIST1H4C_plasma cell |
| 1577 | 4.35E-57  | 0.627212129 | 0.969 | 0.365 | 9.49E-53    | PRDX4     | 4 | HIST1H4C_plasma cell |
| 1578 | 5.85E-68  | 0.626906634 | 0.992 | 0.443 | 1.28E-63    | ROMO1     | 4 | HIST1H4C_plasma cell |
| 1579 | 1.79E-97  | 0.626572887 | 0.954 | 0.291 | 3.90E-93    | LSM3      | 4 | HIST1H4C_plasma cell |
| 1580 | 5.08E-08  | 0.625355554 | 0.162 | 0.063 | 0.001108196 | IGKV2D-30 | 4 | HIST1H4C_plasma cell |
| 1581 | 3.77E-78  | 0.625335714 | 0.927 | 0.318 | 8.21E-74    | CRELD2    | 4 | HIST1H4C_plasma cell |
| 1582 | 2.57E-93  | 0.624146353 | 0.934 | 0.28  | 5.60E-89    | LIME1     | 4 | HIST1H4C_plasma cell |
| 1583 | 5.36E-59  | 0.620713237 | 0.977 | 0.589 | 1.17E-54    | COX6C     | 4 | HIST1H4C_plasma cell |
| 1584 | 2.31E-126 | 0.619289818 | 0.776 | 0.103 | 5.05E-122   | MCM7      | 4 | HIST1H4C_plasma cell |
| 1585 | 3.26E-87  | 0.619087253 | 0.954 | 0.312 | 7.11E-83    | CISD2     | 4 | HIST1H4C_plasma cell |
| 1586 | 1.74E-87  | 0.617352289 | 0.934 | 0.3   | 3.79E-83    | PSMA3     | 4 | HIST1H4C_plasma cell |
| 1587 | 5.36E-88  | 0.612534169 | 0.934 | 0.304 | 1.17E-83    | PSMA5     | 4 | HIST1H4C_plasma cell |
| 1588 | 1.10E-86  | 0.609684656 | 0.954 | 0.328 | 2.40E-82    | MRPL51    | 4 | HIST1H4C_plasma cell |
| 1589 | 8.76E-71  | 0.609027785 | 0.931 | 0.344 | 1.91E-66    | SNRPB     | 4 | HIST1H4C_plasma cell |
| 1590 | 8.81E-69  | 0.606871948 | 0.923 | 0.364 | 1.92E-64    | MDH2      | 4 | HIST1H4C_plasma cell |
| 1591 | 1.02E-48  | 0.606027239 | 0.923 | 0.416 | 2.23E-44    | GSTP1     | 4 | HIST1H4C_plasma cell |
| 1592 | 5.44E-59  | 0.605742192 | 0.973 | 0.494 | 1.19E-54    | ZNF706    | 4 | HIST1H4C_plasma cell |
| 1593 | 4.39E-65  | 0.604636869 | 0.961 | 0.388 | 9.57E-61    | DERL1     | 4 | HIST1H4C_plasma cell |
| 1594 | 2.61E-101 | 0.603479702 | 0.826 | 0.178 | 5.70E-97    | KPNA2     | 4 | HIST1H4C_plasma cell |
| 1595 | 1.43E-72  | 0.602797019 | 0.653 | 0.143 | 3.11E-68    | HIST1H1E  | 4 | HIST1H4C_plasma cell |
| 1596 | 2.68E-65  | 0.601147345 | 0.961 | 0.391 | 5.84E-61    | CDK2AP2   | 4 | HIST1H4C_plasma cell |
| 1597 | 3.43E-82  | 0.600259848 | 0.934 | 0.312 | 7.47E-78    | PSMA6     | 4 | HIST1H4C_plasma cell |
| 1598 | 5.55E-87  | 0.597026061 | 0.911 | 0.284 | 1.21E-82    | UQCRC1    | 4 | HIST1H4C_plasma cell |
| 1599 | 6.70E-49  | 0.596654717 | 0.977 | 0.566 | 1.46E-44    | PRDX1     | 4 | HIST1H4C_plasma cell |
| 1600 | 9.47E-54  | 0.59250517  | 0.977 | 0.468 | 2.07E-49    | TRAM1     | 4 | HIST1H4C_plasma cell |
| 1601 | 1.08E-87  | 0.5921674   | 0.931 | 0.305 | 2.37E-83    | NDUFB3    | 4 | HIST1H4C_plasma cell |
| 1602 | 5.04E-240 | 0.591205344 | 0.753 | 0.018 | 1.10E-235   | CCNA2     | 4 | HIST1H4C_plasma cell |
| 1603 | 7.73E-212 | 0.590766528 | 0.691 | 0.02  | 1.68E-207   | CDK1      | 4 | HIST1H4C_plasma cell |
| 1604 | 8.37E-71  | 0.590070922 | 0.942 | 0.357 | 1.83E-66    | SRSF9     | 4 | HIST1H4C_plasma cell |
| 1605 | 6.09E-237 | 0.589641231 | 0.819 | 0.034 | 1.33E-232   | CENPW     | 4 | HIST1H4C_plasma cell |
| 1606 | 3.98E-111 | 0.589469808 | 0.911 | 0.229 | 8.69E-107   | TXNDC17   | 4 | HIST1H4C_plasma cell |
| 1607 | 2.89E-61  | 0.588154586 | 0.965 | 0.459 | 6.30E-57    | GNG5      | 4 | HIST1H4C_plasma cell |
| 1608 | 1.42E-67  | 0.587778525 | 0.938 | 0.39  | 3.09E-63    | PSMD8     | 4 | HIST1H4C_plasma cell |
| 1609 | 1.18E-134 | 0.584106627 | 0.61  | 0.048 | 2.57E-130   | HIST1H2AJ | 4 | HIST1H4C_plasma cell |
| 1610 | 9.23E-52  | 0.583821099 | 0.977 | 0.518 | 2.01E-47    | EIF5A     | 4 | HIST1H4C_plasma cell |
| 1611 | 2.32E-190 | 0.579222827 | 0.741 | 0.046 | 5.05E-186   | BUB1      | 4 | HIST1H4C_plasma cell |
| 1612 | 3.37E-82  | 0.579192498 | 0.946 | 0.31  | 7.35E-78    | TALDO1    | 4 | HIST1H4C_plasma cell |
| 1613 | 1.46E-75  | 0.579092464 | 0.95  | 0.344 | 3.19E-71    | ANXA5     | 4 | HIST1H4C_plasma cell |
| 1614 | 1.58E-113 | 0.577919177 | 0.869 | 0.183 | 3.45E-109   | CD320     | 4 | HIST1H4C_plasma cell |
| 1615 | 3.68E-39  | 0.575211131 | 0.981 | 0.745 | 8.02E-35    | VIM       | 4 | HIST1H4C_plasma cell |
| 1616 | 1.23E-62  | 0.575048079 | 0.969 | 0.437 | 2.68E-58    | PSMB1     | 4 | HIST1H4C_plasma cell |
| 1617 | 1.81E-116 | 0.57487252  | 0.88  | 0.189 | 3.94E-112   | DCPS      | 4 | HIST1H4C_plasma cell |
| 1618 | 4.71E-64  | 0.573621196 | 0.95  | 0.409 | 1.03E-59    | ATP5F1    | 4 | HIST1H4C_plasma cell |
| 1619 | 3.33E-86  | 0.572003463 | 0.907 | 0.28  | 7.27E-82    | NANS      | 4 | HIST1H4C_plasma cell |
| 1620 | 6.59E-65  | 0.571696184 | 0.958 | 0.395 | 1.44E-60    | ATP5C1    | 4 | HIST1H4C_plasma cell |
| 1621 | 1.96E-54  | 0.570992384 | 0.973 | 0.496 | 4.27E-50    | C14orf2   | 4 | HIST1H4C_plasma cell |
| 1622 | 8.42E-55  | 0.570356166 | 0.996 | 0.882 | 1.84E-50    | H3F3A     | 4 | HIST1H4C_plasma cell |
| 1623 | 4.17E-80  | 0.570203471 | 0.915 | 0.282 | 9.09E-76    | CKAP4     | 4 | HIST1H4C_plasma cell |
| 1624 | 8.07E-84  | 0.568931657 | 0.961 | 0.325 | 1.76E-79    | LSM5      | 4 | HIST1H4C_plasma cell |
| 1625 | 6.74E-21  | 0.56848871  | 0.506 | 0.221 | 1.47E-16    | IGHG2     | 4 | HIST1H4C_plasma cell |
| 1626 | 1.05E-73  | 0.568475113 | 0.876 | 0.278 | 2.29E-69    | IDH2      | 4 | HIST1H4C_plasma cell |
| 1627 | 4.05E-146 | 0.568015491 | 0.846 | 0.122 | 8.82E-142   | TMEM106C  | 4 | HIST1H4C_plasma cell |
| 1628 | 9.94E-78  | 0.566953239 | 0.954 | 0.332 | 2.17E-73    | NDUFB7    | 4 | HIST1H4C_plasma cell |
| 1629 | 3.53E-76  | 0.563752248 | 0.958 | 0.315 | 7.69E-72    | RRBP1     | 4 | HIST1H4C_plasma cell |
| 1630 | 6.56E-172 | 0.563317199 | 0.745 | 0.058 | 1.43E-167   | PHF19     | 4 | HIST1H4C_plasma cell |

|      |           |             |       |       |           |           |   |                      |
|------|-----------|-------------|-------|-------|-----------|-----------|---|----------------------|
| 1631 | 2.05E-58  | 0.561565901 | 0.958 | 0.442 | 4.47E-54  | PARK7     | 4 | HIST1H4C_plasma cell |
| 1632 | 9.07E-46  | 0.561517064 | 0.95  | 0.382 | 1.98E-41  | DERL3     | 4 | HIST1H4C_plasma cell |
| 1633 | 2.84E-85  | 0.560241176 | 0.892 | 0.278 | 6.19E-81  | PDCD5     | 4 | HIST1H4C_plasma cell |
| 1634 | 1.68E-76  | 0.558588365 | 0.938 | 0.325 | 3.66E-72  | UQCRFS1   | 4 | HIST1H4C_plasma cell |
| 1635 | 8.62E-72  | 0.558123773 | 0.892 | 0.304 | 1.88E-67  | TKT       | 4 | HIST1H4C_plasma cell |
| 1636 | 1.66E-119 | 0.554820864 | 0.71  | 0.096 | 3.62E-115 | PCNA      | 4 | HIST1H4C_plasma cell |
| 1637 | 1.10E-92  | 0.554542548 | 0.911 | 0.245 | 2.39E-88  | HNRNPAB   | 4 | HIST1H4C_plasma cell |
| 1638 | 4.74E-42  | 0.553405604 | 0.927 | 0.398 | 1.03E-37  | LGALS1    | 4 | HIST1H4C_plasma cell |
| 1639 | 6.94E-242 | 0.552638796 | 0.753 | 0.018 | 1.51E-237 | ZWINT     | 4 | HIST1H4C_plasma cell |
| 1640 | 8.58E-77  | 0.549124659 | 0.641 | 0.131 | 1.87E-72  | HIST1H2BJ | 4 | HIST1H4C_plasma cell |
| 1641 | 2.66E-54  | 0.549030569 | 0.965 | 0.378 | 5.79E-50  | ERLEC1    | 4 | HIST1H4C_plasma cell |
| 1642 | 1.55E-52  | 0.548355225 | 0.958 | 0.445 | 3.38E-48  | PEBP1     | 4 | HIST1H4C_plasma cell |
| 1643 | 2.50E-78  | 0.547786624 | 0.927 | 0.299 | 5.44E-74  | SRPRB     | 4 | HIST1H4C_plasma cell |
| 1644 | 1.57E-61  | 0.547731571 | 0.965 | 0.427 | 3.41E-57  | TUFM      | 4 | HIST1H4C_plasma cell |
| 1645 | 3.89E-177 | 0.544130227 | 0.753 | 0.058 | 8.49E-173 | APOBEC3B  | 4 | HIST1H4C_plasma cell |
| 1646 | 1.32E-78  | 0.541396255 | 0.942 | 0.308 | 2.89E-74  | SAR1B     | 4 | HIST1H4C_plasma cell |
| 1647 | 9.01E-70  | 0.540387029 | 0.934 | 0.331 | 1.96E-65  | MRPS24    | 4 | HIST1H4C_plasma cell |
| 1648 | 3.43E-51  | 0.538485466 | 0.946 | 0.46  | 7.47E-47  | UQCR10    | 4 | HIST1H4C_plasma cell |
| 1649 | 2.90E-150 | 0.537600448 | 0.772 | 0.087 | 6.33E-146 | HMGB3     | 4 | HIST1H4C_plasma cell |
| 1650 | 4.73E-81  | 0.537228125 | 0.907 | 0.28  | 1.03E-76  | NDUFC1    | 4 | HIST1H4C_plasma cell |
| 1651 | 5.61E-52  | 0.536445826 | 0.988 | 0.53  | 1.22E-47  | TCEB2     | 4 | HIST1H4C_plasma cell |
| 1652 | 3.44E-154 | 0.535846804 | 0.483 | 0.008 | 7.50E-150 | PLK1      | 4 | HIST1H4C_plasma cell |
| 1653 | 2.10E-46  | 0.534290923 | 0.969 | 0.622 | 4.58E-42  | SLC25A3   | 4 | HIST1H4C_plasma cell |
| 1654 | 9.36E-82  | 0.533418136 | 0.931 | 0.285 | 2.04E-77  | SNRPD1    | 4 | HIST1H4C_plasma cell |
| 1655 | 5.60E-81  | 0.530412888 | 0.9   | 0.278 | 1.22E-76  | PREB      | 4 | HIST1H4C_plasma cell |
| 1656 | 2.60E-96  | 0.530293702 | 0.88  | 0.228 | 5.68E-92  | SLC35B1   | 4 | HIST1H4C_plasma cell |
| 1657 | 3.37E-99  | 0.530046721 | 0.815 | 0.172 | 7.35E-95  | GYG1      | 4 | HIST1H4C_plasma cell |
| 1658 | 8.05E-70  | 0.527949836 | 0.965 | 0.362 | 1.75E-65  | MRPS34    | 4 | HIST1H4C_plasma cell |
| 1659 | 3.63E-87  | 0.52766739  | 0.907 | 0.264 | 7.91E-83  | STT3A     | 4 | HIST1H4C_plasma cell |
| 1660 | 1.47E-64  | 0.526418731 | 0.934 | 0.359 | 3.20E-60  | ILF2      | 4 | HIST1H4C_plasma cell |
| 1661 | 5.81E-79  | 0.526271352 | 0.931 | 0.305 | 1.27E-74  | IER3IP1   | 4 | HIST1H4C_plasma cell |
| 1662 | 4.16E-56  | 0.526257004 | 0.961 | 0.41  | 9.08E-52  | VOPP1     | 4 | HIST1H4C_plasma cell |
| 1663 | 9.48E-177 | 0.526220763 | 0.672 | 0.033 | 2.07E-172 | ASPM      | 4 | HIST1H4C_plasma cell |
| 1664 | 1.01E-48  | 0.525674203 | 0.969 | 0.477 | 2.20E-44  | USMG5     | 4 | HIST1H4C_plasma cell |
| 1665 | 3.96E-46  | 0.524052912 | 0.965 | 0.48  | 8.64E-42  | ARF4      | 4 | HIST1H4C_plasma cell |
| 1666 | 1.95E-93  | 0.522430337 | 0.876 | 0.237 | 4.25E-89  | STOML2    | 4 | HIST1H4C_plasma cell |
| 1667 | 2.70E-87  | 0.521407258 | 0.907 | 0.261 | 5.89E-83  | GARS      | 4 | HIST1H4C_plasma cell |
| 1668 | 7.56E-47  | 0.52028235  | 0.961 | 0.527 | 1.65E-42  | ARF1      | 4 | HIST1H4C_plasma cell |
| 1669 | 2.37E-67  | 0.519010152 | 0.927 | 0.333 | 5.16E-63  | VDAC1     | 4 | HIST1H4C_plasma cell |
| 1670 | 1.36E-59  | 0.517104915 | 0.942 | 0.378 | 2.96E-55  | CCT8      | 4 | HIST1H4C_plasma cell |
| 1671 | 3.50E-46  | 0.516999789 | 0.973 | 0.522 | 7.63E-42  | RBM3      | 4 | HIST1H4C_plasma cell |
| 1672 | 3.97E-172 | 0.516360336 | 0.629 | 0.026 | 8.66E-168 | TOP2A     | 4 | HIST1H4C_plasma cell |
| 1673 | 7.21E-47  | 0.515462614 | 0.988 | 0.637 | 1.57E-42  | SSR2      | 4 | HIST1H4C_plasma cell |
| 1674 | 1.67E-41  | 0.515368778 | 0.985 | 0.533 | 3.64E-37  | RABAC1    | 4 | HIST1H4C_plasma cell |
| 1675 | 3.20E-61  | 0.515156001 | 0.969 | 0.39  | 6.98E-57  | GHITM     | 4 | HIST1H4C_plasma cell |
| 1676 | 8.43E-64  | 0.514837535 | 0.919 | 0.33  | 1.84E-59  | PA2G4     | 4 | HIST1H4C_plasma cell |
| 1677 | 9.97E-100 | 0.513693541 | 0.876 | 0.213 | 2.17E-95  | TIMM8B    | 4 | HIST1H4C_plasma cell |
| 1678 | 4.29E-54  | 0.513506114 | 0.938 | 0.407 | 9.35E-50  | FKBP1A    | 4 | HIST1H4C_plasma cell |
| 1679 | 5.50E-67  | 0.513053792 | 0.923 | 0.339 | 1.20E-62  | BUB3      | 4 | HIST1H4C_plasma cell |
| 1680 | 1.90E-46  | 0.512985677 | 0.977 | 0.53  | 4.14E-42  | COX5B     | 4 | HIST1H4C_plasma cell |
| 1681 | 3.35E-48  | 0.508223724 | 0.973 | 0.463 | 7.30E-44  | SET       | 4 | HIST1H4C_plasma cell |
| 1682 | 6.79E-97  | 0.508217951 | 0.931 | 0.243 | 1.48E-92  | HNRNPD    | 4 | HIST1H4C_plasma cell |
| 1683 | 6.10E-84  | 0.506181231 | 0.934 | 0.278 | 1.33E-79  | SNRPC     | 4 | HIST1H4C_plasma cell |
| 1684 | 1.49E-76  | 0.505713065 | 0.919 | 0.297 | 3.25E-72  | SRP72     | 4 | HIST1H4C_plasma cell |
| 1685 | 1.42E-204 | 0.505621171 | 0.668 | 0.019 | 3.09E-200 | CCNB2     | 4 | HIST1H4C_plasma cell |
| 1686 | 3.69E-86  | 0.505113749 | 0.9   | 0.262 | 8.05E-82  | MRPL57    | 4 | HIST1H4C_plasma cell |
| 1687 | 3.69E-48  | 0.503713141 | 0.981 | 0.487 | 8.04E-44  | ANP32B    | 4 | HIST1H4C_plasma cell |
| 1688 | 2.63E-111 | 0.501716612 | 0.861 | 0.183 | 5.73E-107 | PSMA2     | 4 | HIST1H4C_plasma cell |
| 1689 | 5.86E-80  | 0.501262259 | 0.892 | 0.26  | 1.28E-75  | EPRS      | 4 | HIST1H4C_plasma cell |
| 1690 | 7.80E-90  | 0.499893872 | 0.799 | 0.17  | 1.70E-85  | MCM5      | 4 | HIST1H4C_plasma cell |
| 1691 | 3.54E-94  | 0.4992962   | 0.919 | 0.257 | 7.72E-90  | FDPS      | 4 | HIST1H4C_plasma cell |
| 1692 | 4.41E-60  | 0.4985604   | 0.954 | 0.392 | 9.62E-56  | ATPIF1    | 4 | HIST1H4C_plasma cell |
| 1693 | 5.40E-197 | 0.497430638 | 0.637 | 0.017 | 1.18E-192 | TPX2      | 4 | HIST1H4C_plasma cell |
| 1694 | 8.29E-58  | 0.496915026 | 0.977 | 0.425 | 1.81E-53  | NDUFB9    | 4 | HIST1H4C_plasma cell |
| 1695 | 7.35E-52  | 0.495936099 | 0.961 | 0.441 | 1.60E-47  | PSMA7     | 4 | HIST1H4C_plasma cell |
| 1696 | 2.60E-54  | 0.495392089 | 1     | 0.858 | 5.67E-50  | SERF2     | 4 | HIST1H4C_plasma cell |
| 1697 | 3.72E-172 | 0.495222567 | 0.784 | 0.066 | 8.11E-168 | SMC2      | 4 | HIST1H4C_plasma cell |
| 1698 | 3.27E-81  | 0.495181335 | 0.911 | 0.284 | 7.13E-77  | C20orf24  | 4 | HIST1H4C_plasma cell |
| 1699 | 2.45E-46  | 0.494362427 | 0.992 | 0.52  | 5.34E-42  | NDUFA1    | 4 | HIST1H4C_plasma cell |
| 1700 | 5.33E-139 | 0.494316743 | 0.537 | 0.027 | 1.16E-134 | CENPF     | 4 | HIST1H4C_plasma cell |
| 1701 | 3.92E-53  | 0.493776942 | 0.969 | 0.426 | 8.55E-49  | NDUFB4    | 4 | HIST1H4C_plasma cell |

|      |           |             |       |       |           |           |   |                      |
|------|-----------|-------------|-------|-------|-----------|-----------|---|----------------------|
| 1702 | 1.75E-196 | 0.493337545 | 0.745 | 0.042 | 3.81E-192 | UBE2T     | 4 | HIST1H4C_plasma cell |
| 1703 | 9.80E-153 | 0.491790628 | 0.552 | 0.022 | 2.14E-148 | HIST1H1B  | 4 | HIST1H4C_plasma cell |
| 1704 | 6.39E-108 | 0.491385188 | 0.811 | 0.161 | 1.39E-103 | CSRFP1    | 4 | HIST1H4C_plasma cell |
| 1705 | 5.44E-197 | 0.4907881   | 0.749 | 0.042 | 1.19E-192 | CDC6      | 4 | HIST1H4C_plasma cell |
| 1706 | 2.02E-94  | 0.489024212 | 0.896 | 0.231 | 4.40E-90  | SURF4     | 4 | HIST1H4C_plasma cell |
| 1707 | 1.19E-49  | 0.488888049 | 0.965 | 0.448 | 2.59E-45  | PRDX5     | 4 | HIST1H4C_plasma cell |
| 1708 | 4.98E-84  | 0.487859325 | 0.919 | 0.275 | 1.09E-79  | SIVA1     | 4 | HIST1H4C_plasma cell |
| 1709 | 5.88E-163 | 0.487685944 | 0.595 | 0.027 | 1.28E-158 | GINS2     | 4 | HIST1H4C_plasma cell |
| 1710 | 2.81E-62  | 0.485676026 | 0.95  | 0.363 | 6.14E-58  | TOP1      | 4 | HIST1H4C_plasma cell |
| 1711 | 3.47E-44  | 0.485079988 | 0.954 | 0.49  | 7.56E-40  | PGK1      | 4 | HIST1H4C_plasma cell |
| 1712 | 4.94E-64  | 0.482579561 | 0.934 | 0.356 | 1.08E-59  | SF3B5     | 4 | HIST1H4C_plasma cell |
| 1713 | 1.85E-55  | 0.481892307 | 0.977 | 0.399 | 4.04E-51  | SRPRA     | 4 | HIST1H4C_plasma cell |
| 1714 | 4.31E-103 | 0.481513289 | 0.853 | 0.194 | 9.41E-99  | UFD1L     | 4 | HIST1H4C_plasma cell |
| 1715 | 6.96E-71  | 0.481159085 | 0.911 | 0.303 | 1.52E-66  | MINOS1    | 4 | HIST1H4C_plasma cell |
| 1716 | 4.58E-63  | 0.478832412 | 0.946 | 0.348 | 9.98E-59  | SND1      | 4 | HIST1H4C_plasma cell |
| 1717 | 1.04E-68  | 0.478729865 | 0.942 | 0.339 | 2.26E-64  | EIF2S2    | 4 | HIST1H4C_plasma cell |
| 1718 | 2.00E-76  | 0.477319566 | 0.888 | 0.267 | 4.35E-72  | CALU      | 4 | HIST1H4C_plasma cell |
| 1719 | 9.92E-62  | 0.473917492 | 0.946 | 0.354 | 2.16E-57  | XRCC5     | 4 | HIST1H4C_plasma cell |
| 1720 | 7.84E-37  | 0.473808559 | 0.961 | 0.571 | 1.71E-32  | LSP1      | 4 | HIST1H4C_plasma cell |
| 1721 | 5.61E-70  | 0.473783517 | 0.919 | 0.322 | 1.22E-65  | NDUFAF3   | 4 | HIST1H4C_plasma cell |
| 1722 | 7.03E-46  | 0.473430861 | 0.973 | 0.478 | 1.53E-41  | UQCR11    | 4 | HIST1H4C_plasma cell |
| 1723 | 2.30E-69  | 0.473232266 | 0.965 | 0.348 | 5.01E-65  | RBX1      | 4 | HIST1H4C_plasma cell |
| 1724 | 8.10E-108 | 0.472158172 | 0.88  | 0.191 | 1.77E-103 | CCDC167   | 4 | HIST1H4C_plasma cell |
| 1725 | 2.05E-80  | 0.470404347 | 0.958 | 0.28  | 4.46E-76  | DDX39A    | 4 | HIST1H4C_plasma cell |
| 1726 | 2.05E-53  | 0.46897237  | 0.969 | 0.424 | 4.47E-49  | NDUFB10   | 4 | HIST1H4C_plasma cell |
| 1727 | 2.54E-112 | 0.468570444 | 0.819 | 0.152 | 5.54E-108 | SSRP1     | 4 | HIST1H4C_plasma cell |
| 1728 | 4.79E-43  | 0.468261262 | 0.973 | 0.593 | 1.04E-38  | PSME1     | 4 | HIST1H4C_plasma cell |
| 1729 | 4.41E-57  | 0.466336784 | 0.958 | 0.392 | 9.61E-53  | TECR      | 4 | HIST1H4C_plasma cell |
| 1730 | 4.80E-78  | 0.466014083 | 0.869 | 0.26  | 1.05E-73  | SLIRP     | 4 | HIST1H4C_plasma cell |
| 1731 | 3.90E-43  | 0.465697833 | 0.996 | 0.57  | 8.51E-39  | JCHAIN    | 4 | HIST1H4C_plasma cell |
| 1732 | 4.33E-181 | 0.464887806 | 0.807 | 0.067 | 9.45E-177 | DTYMK     | 4 | HIST1H4C_plasma cell |
| 1733 | 7.99E-47  | 0.464852146 | 0.938 | 0.459 | 1.74E-42  | PPP1CA    | 4 | HIST1H4C_plasma cell |
| 1734 | 4.78E-83  | 0.463629911 | 0.927 | 0.26  | 1.04E-78  | ANP32E    | 4 | HIST1H4C_plasma cell |
| 1735 | 1.08E-88  | 0.4617341   | 0.876 | 0.228 | 2.35E-84  | VDAC3     | 4 | HIST1H4C_plasma cell |
| 1736 | 1.35E-62  | 0.46092939  | 0.954 | 0.359 | 2.95E-58  | NDUFA11   | 4 | HIST1H4C_plasma cell |
| 1737 | 5.91E-81  | 0.460928507 | 0.923 | 0.276 | 1.29E-76  | CBWD1     | 4 | HIST1H4C_plasma cell |
| 1738 | 9.88E-84  | 0.460105243 | 0.842 | 0.222 | 2.16E-79  | PHB       | 4 | HIST1H4C_plasma cell |
| 1739 | 4.91E-34  | 0.45824378  | 0.958 | 0.5   | 1.07E-29  | SELK      | 4 | HIST1H4C_plasma cell |
| 1740 | 3.56E-84  | 0.458139125 | 0.946 | 0.278 | 7.75E-80  | PSMA4     | 4 | HIST1H4C_plasma cell |
| 1741 | 1.02E-75  | 0.458100678 | 0.942 | 0.314 | 2.22E-71  | NDUFS8    | 4 | HIST1H4C_plasma cell |
| 1742 | 3.77E-103 | 0.45720874  | 0.757 | 0.131 | 8.23E-99  | UBE2S     | 4 | HIST1H4C_plasma cell |
| 1743 | 5.06E-50  | 0.456502905 | 0.958 | 0.416 | 1.10E-45  | SELT      | 4 | HIST1H4C_plasma cell |
| 1744 | 9.39E-124 | 0.455592164 | 0.672 | 0.074 | 2.05E-119 | MCM3      | 4 | HIST1H4C_plasma cell |
| 1745 | 1.77E-46  | 0.455168291 | 0.961 | 0.474 | 3.87E-42  | CYCS      | 4 | HIST1H4C_plasma cell |
| 1746 | 1.21E-35  | 0.454449838 | 0.988 | 0.666 | 2.63E-31  | CLIC1     | 4 | HIST1H4C_plasma cell |
| 1747 | 1.42E-126 | 0.453908728 | 0.819 | 0.132 | 3.11E-122 | EBP       | 4 | HIST1H4C_plasma cell |
| 1748 | 4.27E-135 | 0.453711264 | 0.792 | 0.1   | 9.30E-131 | CENPM     | 4 | HIST1H4C_plasma cell |
| 1749 | 1.96E-84  | 0.453034512 | 0.834 | 0.212 | 4.27E-80  | SLC38A5   | 4 | HIST1H4C_plasma cell |
| 1750 | 5.55E-65  | 0.451869871 | 0.915 | 0.317 | 1.21E-60  | TMEM208   | 4 | HIST1H4C_plasma cell |
| 1751 | 8.61E-69  | 0.451475902 | 0.907 | 0.304 | 1.88E-64  | CCT7      | 4 | HIST1H4C_plasma cell |
| 1752 | 1.89E-60  | 0.451428235 | 0.954 | 0.373 | 4.11E-56  | YWHAE     | 4 | HIST1H4C_plasma cell |
| 1753 | 6.04E-137 | 0.449729481 | 0.784 | 0.106 | 1.32E-132 | BOLA3     | 4 | HIST1H4C_plasma cell |
| 1754 | 6.32E-37  | 0.449652846 | 0.981 | 0.651 | 1.38E-32  | OST4      | 4 | HIST1H4C_plasma cell |
| 1755 | 9.67E-40  | 0.448426016 | 0.985 | 0.548 | 2.11E-35  | ATP5D     | 4 | HIST1H4C_plasma cell |
| 1756 | 8.70E-81  | 0.448051695 | 0.919 | 0.277 | 1.90E-76  | RER1      | 4 | HIST1H4C_plasma cell |
| 1757 | 1.38E-71  | 0.447825536 | 0.915 | 0.305 | 3.01E-67  | MESDC2    | 4 | HIST1H4C_plasma cell |
| 1758 | 1.45E-130 | 0.447226617 | 0.51  | 0.025 | 3.17E-126 | HIST1H2AI | 4 | HIST1H4C_plasma cell |
| 1759 | 1.70E-190 | 0.447086143 | 0.637 | 0.019 | 3.70E-186 | DLGAP5    | 4 | HIST1H4C_plasma cell |
| 1760 | 9.47E-154 | 0.446395452 | 0.784 | 0.083 | 2.07E-149 | KIF22     | 4 | HIST1H4C_plasma cell |
| 1761 | 1.12E-102 | 0.446103434 | 0.903 | 0.204 | 2.44E-98  | LSM4      | 4 | HIST1H4C_plasma cell |
| 1762 | 1.18E-36  | 0.446070439 | 0.981 | 0.522 | 2.57E-32  | KRTCAP2   | 4 | HIST1H4C_plasma cell |
| 1763 | 9.36E-89  | 0.445707969 | 0.873 | 0.216 | 2.04E-84  | SLC9A3R1  | 4 | HIST1H4C_plasma cell |
| 1764 | 4.32E-33  | 0.445350354 | 0.981 | 0.656 | 9.43E-29  | RPL22L1   | 4 | HIST1H4C_plasma cell |
| 1765 | 5.40E-54  | 0.445178606 | 0.923 | 0.344 | 1.18E-49  | TXNDC11   | 4 | HIST1H4C_plasma cell |
| 1766 | 8.65E-183 | 0.444879073 | 0.606 | 0.017 | 1.89E-178 | PKMYT1    | 4 | HIST1H4C_plasma cell |
| 1767 | 2.64E-140 | 0.443708506 | 0.56  | 0.031 | 5.75E-136 | CCNB1     | 4 | HIST1H4C_plasma cell |
| 1768 | 1.33E-201 | 0.442076312 | 0.734 | 0.034 | 2.90E-197 | CENPU     | 4 | HIST1H4C_plasma cell |
| 1769 | 5.11E-95  | 0.441794656 | 0.641 | 0.097 | 1.12E-90  | LILRB4    | 4 | HIST1H4C_plasma cell |
| 1770 | 2.41E-97  | 0.4417038   | 0.842 | 0.194 | 5.26E-93  | MTCH2     | 4 | HIST1H4C_plasma cell |
| 1771 | 1.20E-94  | 0.441678    | 0.629 | 0.096 | 2.61E-90  | PSAT1     | 4 | HIST1H4C_plasma cell |
| 1772 | 1.28E-154 | 0.44158621  | 0.764 | 0.077 | 2.79E-150 | BCL2L12   | 4 | HIST1H4C_plasma cell |



|      |           |             |       |       |           |          |   |                      |
|------|-----------|-------------|-------|-------|-----------|----------|---|----------------------|
| 1773 | 9.50E-78  | 0.440856726 | 0.896 | 0.258 | 2.07E-73  | CCT6A    | 4 | HIST1H4C_plasma cell |
| 1774 | 1.22E-67  | 0.439665216 | 0.927 | 0.298 | 2.66E-63  | DNAJC3   | 4 | HIST1H4C_plasma cell |
| 1775 | 5.84E-75  | 0.439503986 | 0.934 | 0.297 | 1.27E-70  | PSMD7    | 4 | HIST1H4C_plasma cell |
| 1776 | 9.11E-60  | 0.439390889 | 0.876 | 0.295 | 1.99E-55  | GLRX     | 4 | HIST1H4C_plasma cell |
| 1777 | 5.69E-32  | 0.437481155 | 0.969 | 0.485 | 1.24E-27  | PIM2     | 4 | HIST1H4C_plasma cell |
| 1778 | 1.64E-65  | 0.437374994 | 0.938 | 0.334 | 3.57E-61  | NOL7     | 4 | HIST1H4C_plasma cell |
| 1779 | 3.67E-96  | 0.434867474 | 0.826 | 0.187 | 8.01E-92  | ISOC2    | 4 | HIST1H4C_plasma cell |
| 1780 | 5.95E-46  | 0.433934409 | 0.965 | 0.448 | 1.30E-41  | NDUFA13  | 4 | HIST1H4C_plasma cell |
| 1781 | 8.49E-76  | 0.433584541 | 0.838 | 0.223 | 1.85E-71  | HIST1H1C | 4 | HIST1H4C_plasma cell |
| 1782 | 4.04E-192 | 0.433535109 | 0.633 | 0.017 | 8.80E-188 | GTSE1    | 4 | HIST1H4C_plasma cell |
| 1783 | 2.06E-77  | 0.433482294 | 0.892 | 0.267 | 4.49E-73  | PPM1G    | 4 | HIST1H4C_plasma cell |
| 1784 | 1.82E-49  | 0.433407422 | 0.958 | 0.412 | 3.97E-45  | GTF3A    | 4 | HIST1H4C_plasma cell |
| 1785 | 6.08E-96  | 0.433267453 | 0.892 | 0.224 | 1.33E-91  | AP2S1    | 4 | HIST1H4C_plasma cell |
| 1786 | 4.19E-105 | 0.432406784 | 0.741 | 0.13  | 9.13E-101 | EBNA1BP2 | 4 | HIST1H4C_plasma cell |
| 1787 | 5.84E-85  | 0.432266929 | 0.888 | 0.239 | 1.27E-80  | HYOU1    | 4 | HIST1H4C_plasma cell |
| 1788 | 3.42E-73  | 0.431690067 | 0.892 | 0.273 | 7.46E-69  | CCNC     | 4 | HIST1H4C_plasma cell |
| 1789 | 3.20E-46  | 0.431244469 | 0.961 | 0.452 | 6.98E-42  | POMP     | 4 | HIST1H4C_plasma cell |
| 1790 | 2.58E-72  | 0.430091288 | 0.931 | 0.31  | 5.63E-68  | TCEB1    | 4 | HIST1H4C_plasma cell |
| 1791 | 1.97E-77  | 0.430030994 | 0.892 | 0.247 | 4.31E-73  | RPA3     | 4 | HIST1H4C_plasma cell |
| 1792 | 8.37E-36  | 0.429997568 | 0.988 | 0.568 | 1.83E-31  | NDUFB11  | 4 | HIST1H4C_plasma cell |
| 1793 | 2.90E-82  | 0.429919933 | 0.896 | 0.253 | 6.31E-78  | C19orf24 | 4 | HIST1H4C_plasma cell |
| 1794 | 2.47E-106 | 0.429784141 | 0.764 | 0.134 | 5.38E-102 | PAICS    | 4 | HIST1H4C_plasma cell |
| 1795 | 7.87E-153 | 0.429559045 | 0.753 | 0.067 | 1.72E-148 | KIF20B   | 4 | HIST1H4C_plasma cell |
| 1796 | 2.15E-182 | 0.429108781 | 0.656 | 0.029 | 4.68E-178 | HMMR     | 4 | HIST1H4C_plasma cell |
| 1797 | 2.28E-71  | 0.428669606 | 0.865 | 0.258 | 4.98E-67  | PIM1     | 4 | HIST1H4C_plasma cell |
| 1798 | 1.30E-42  | 0.426171537 | 0.969 | 0.39  | 2.83E-38  | FKBP2    | 4 | HIST1H4C_plasma cell |
| 1799 | 3.73E-95  | 0.426025441 | 0.838 | 0.188 | 8.13E-91  | AHCY     | 4 | HIST1H4C_plasma cell |
| 1800 | 4.45E-142 | 0.425990136 | 0.676 | 0.064 | 9.71E-138 | TUBG1    | 4 | HIST1H4C_plasma cell |
| 1801 | 1.95E-146 | 0.425890489 | 0.737 | 0.076 | 4.24E-142 | GMNN     | 4 | HIST1H4C_plasma cell |
| 1802 | 3.23E-90  | 0.425749835 | 0.876 | 0.229 | 7.05E-86  | PSMC3    | 4 | HIST1H4C_plasma cell |
| 1803 | 1.10E-37  | 0.425642899 | 0.977 | 0.502 | 2.41E-33  | CD99     | 4 | HIST1H4C_plasma cell |
| 1804 | 2.91E-89  | 0.423001071 | 0.822 | 0.203 | 6.34E-85  | NUDT5    | 4 | HIST1H4C_plasma cell |
| 1805 | 5.47E-105 | 0.420941449 | 0.876 | 0.193 | 1.19E-100 | MRPS16   | 4 | HIST1H4C_plasma cell |
| 1806 | 4.99E-54  | 0.41812775  | 0.942 | 0.377 | 1.09E-49  | TOMM5    | 4 | HIST1H4C_plasma cell |
| 1807 | 5.32E-78  | 0.417639776 | 0.892 | 0.264 | 1.16E-73  | TMEM167A | 4 | HIST1H4C_plasma cell |
| 1808 | 9.70E-111 | 0.417270068 | 0.834 | 0.159 | 2.12E-106 | STRA13   | 4 | HIST1H4C_plasma cell |
| 1809 | 7.90E-88  | 0.4169167   | 0.865 | 0.223 | 1.72E-83  | MRPS15   | 4 | HIST1H4C_plasma cell |
| 1810 | 3.39E-140 | 0.416673121 | 0.768 | 0.088 | 7.38E-136 | LMNB1    | 4 | HIST1H4C_plasma cell |
| 1811 | 2.28E-69  | 0.416076543 | 0.9   | 0.288 | 4.96E-65  | COPB2    | 4 | HIST1H4C_plasma cell |
| 1812 | 4.38E-67  | 0.415471504 | 0.927 | 0.32  | 9.55E-63  | NAA38    | 4 | HIST1H4C_plasma cell |
| 1813 | 1.37E-81  | 0.413682633 | 0.826 | 0.224 | 2.98E-77  | YIF1B    | 4 | HIST1H4C_plasma cell |
| 1814 | 7.01E-69  | 0.412896133 | 0.865 | 0.259 | 1.53E-64  | SNRPE    | 4 | HIST1H4C_plasma cell |
| 1815 | 4.15E-113 | 0.411976335 | 0.853 | 0.163 | 9.04E-109 | MRPL37   | 4 | HIST1H4C_plasma cell |
| 1816 | 1.30E-64  | 0.410014061 | 0.919 | 0.306 | 2.82E-60  | CBX3     | 4 | HIST1H4C_plasma cell |
| 1817 | 4.81E-122 | 0.40898661  | 0.691 | 0.083 | 1.05E-117 | DNMT1    | 4 | HIST1H4C_plasma cell |
| 1818 | 1.01E-60  | 0.408883289 | 0.919 | 0.334 | 2.20E-56  | NDUFA2   | 4 | HIST1H4C_plasma cell |
| 1819 | 2.67E-69  | 0.408495892 | 0.849 | 0.256 | 5.82E-65  | GPI      | 4 | HIST1H4C_plasma cell |
| 1820 | 1.67E-89  | 0.408217733 | 0.552 | 0.074 | 3.64E-85  | PHGDH    | 4 | HIST1H4C_plasma cell |
| 1821 | 1.85E-150 | 0.407939865 | 0.768 | 0.081 | 4.04E-146 | SKA2     | 4 | HIST1H4C_plasma cell |
| 1822 | 1.22E-64  | 0.406730394 | 0.934 | 0.328 | 2.67E-60  | CCT2     | 4 | HIST1H4C_plasma cell |
| 1823 | 5.33E-49  | 0.405538132 | 0.934 | 0.396 | 1.16E-44  | ARHGDI A | 4 | HIST1H4C_plasma cell |
| 1824 | 8.33E-71  | 0.403577968 | 0.888 | 0.28  | 1.82E-66  | EMC7     | 4 | HIST1H4C_plasma cell |
| 1825 | 8.88E-62  | 0.402592389 | 0.942 | 0.353 | 1.94E-57  | NDUFS7   | 4 | HIST1H4C_plasma cell |
| 1826 | 1.35E-75  | 0.402483302 | 0.857 | 0.256 | 2.94E-71  | TIMM17A  | 4 | HIST1H4C_plasma cell |
| 1827 | 2.57E-119 | 0.401116893 | 0.78  | 0.124 | 5.61E-115 | POP7     | 4 | HIST1H4C_plasma cell |
| 1828 | 7.34E-85  | 0.400969014 | 0.834 | 0.207 | 1.60E-80  | UBA5     | 4 | HIST1H4C_plasma cell |
| 1829 | 2.16E-65  | 0.400610055 | 0.884 | 0.295 | 4.70E-61  | MYEOV2   | 4 | HIST1H4C_plasma cell |
| 1830 | 2.63E-27  | 0.40054116  | 0.985 | 0.655 | 5.73E-23  | NCL      | 4 | HIST1H4C_plasma cell |
| 1831 | 5.81E-118 | 0.399967764 | 0.784 | 0.129 | 1.27E-113 | FH       | 4 | HIST1H4C_plasma cell |
| 1832 | 3.72E-67  | 0.399729004 | 0.892 | 0.298 | 8.11E-63  | MZT2B    | 4 | HIST1H4C_plasma cell |
| 1833 | 2.01E-112 | 0.397861283 | 0.834 | 0.156 | 4.39E-108 | MRPL27   | 4 | HIST1H4C_plasma cell |
| 1834 | 1.88E-51  | 0.397606761 | 0.927 | 0.375 | 4.10E-47  | HAX1     | 4 | HIST1H4C_plasma cell |
| 1835 | 7.09E-90  | 0.396654399 | 0.819 | 0.195 | 1.55E-85  | UQCC2    | 4 | HIST1H4C_plasma cell |
| 1836 | 6.11E-40  | 0.396367556 | 0.969 | 0.491 | 1.33E-35  | HNRNPA3  | 4 | HIST1H4C_plasma cell |
| 1837 | 2.69E-62  | 0.395964414 | 0.915 | 0.333 | 5.86E-58  | ANAPC5   | 4 | HIST1H4C_plasma cell |
| 1838 | 1.73E-104 | 0.393956826 | 0.807 | 0.16  | 3.78E-100 | MYCBP    | 4 | HIST1H4C_plasma cell |
| 1839 | 1.16E-46  | 0.393300787 | 0.969 | 0.425 | 2.52E-42  | MRPL52   | 4 | HIST1H4C_plasma cell |
| 1840 | 9.41E-88  | 0.39316002  | 0.842 | 0.206 | 2.05E-83  | GTF3C6   | 4 | HIST1H4C_plasma cell |
| 1841 | 1.43E-61  | 0.39305688  | 0.857 | 0.284 | 3.11E-57  | NHP2     | 4 | HIST1H4C_plasma cell |
| 1842 | 3.85E-55  | 0.392639593 | 0.915 | 0.331 | 8.39E-51  | SEC14L1  | 4 | HIST1H4C_plasma cell |
| 1843 | 4.88E-53  | 0.392529101 | 0.911 | 0.353 | 1.06E-48  | ARPC5L   | 4 | HIST1H4C_plasma cell |

|      |           |             |       |       |           |             |   |                      |
|------|-----------|-------------|-------|-------|-----------|-------------|---|----------------------|
| 1844 | 8.11E-97  | 0.39200137  | 0.819 | 0.174 | 1.77E-92  | GMPPA       | 4 | HIST1H4C_plasma cell |
| 1845 | 2.08E-80  | 0.391964899 | 0.9   | 0.25  | 4.54E-76  | PSMC5       | 4 | HIST1H4C_plasma cell |
| 1846 | 1.23E-77  | 0.391129896 | 0.849 | 0.233 | 2.68E-73  | MRPS7       | 4 | HIST1H4C_plasma cell |
| 1847 | 1.35E-53  | 0.390984496 | 0.938 | 0.369 | 2.94E-49  | RPS19BP1    | 4 | HIST1H4C_plasma cell |
| 1848 | 7.84E-74  | 0.390490024 | 0.896 | 0.266 | 1.71E-69  | MDH1        | 4 | HIST1H4C_plasma cell |
| 1849 | 1.06E-27  | 0.389937313 | 0.958 | 0.522 | 2.31E-23  | PDIA3       | 4 | HIST1H4C_plasma cell |
| 1850 | 2.45E-79  | 0.389862953 | 0.834 | 0.223 | 5.34E-75  | MPC1        | 4 | HIST1H4C_plasma cell |
| 1851 | 7.98E-22  | 0.389202098 | 0.811 | 0.535 | 1.74E-17  | IGKC        | 4 | HIST1H4C_plasma cell |
| 1852 | 1.82E-58  | 0.388020898 | 0.911 | 0.325 | 3.98E-54  | MMADHC      | 4 | HIST1H4C_plasma cell |
| 1853 | 1.93E-45  | 0.387910034 | 0.958 | 0.424 | 4.20E-41  | NDUFB2      | 4 | HIST1H4C_plasma cell |
| 1854 | 2.63E-58  | 0.387851995 | 0.896 | 0.311 | 5.74E-54  | BANF1       | 4 | HIST1H4C_plasma cell |
| 1855 | 1.70E-48  | 0.387696757 | 0.942 | 0.37  | 3.70E-44  | ELL2        | 4 | HIST1H4C_plasma cell |
| 1856 | 8.23E-45  | 0.387674799 | 0.961 | 0.441 | 1.79E-40  | PSMB8       | 4 | HIST1H4C_plasma cell |
| 1857 | 9.35E-61  | 0.387504386 | 0.9   | 0.303 | 2.04E-56  | ALG5        | 4 | HIST1H4C_plasma cell |
| 1858 | 1.72E-73  | 0.387173009 | 0.819 | 0.226 | 3.74E-69  | REXO2       | 4 | HIST1H4C_plasma cell |
| 1859 | 1.17E-120 | 0.385765969 | 0.691 | 0.088 | 2.55E-116 | CHAC2       | 4 | HIST1H4C_plasma cell |
| 1860 | 3.31E-163 | 0.385242264 | 0.722 | 0.058 | 7.23E-159 | LRR1        | 4 | HIST1H4C_plasma cell |
| 1861 | 5.67E-200 | 0.384978495 | 0.653 | 0.017 | 1.24E-195 | KIFC1       | 4 | HIST1H4C_plasma cell |
| 1862 | 7.88E-72  | 0.384397715 | 0.792 | 0.2   | 1.72E-67  | SLBP        | 4 | HIST1H4C_plasma cell |
| 1863 | 9.37E-35  | 0.384280843 | 0.988 | 0.75  | 2.04E-30  | ATP5L       | 4 | HIST1H4C_plasma cell |
| 1864 | 4.88E-60  | 0.383122666 | 0.869 | 0.308 | 1.06E-55  | ADRM1       | 4 | HIST1H4C_plasma cell |
| 1865 | 2.41E-73  | 0.38229423  | 0.788 | 0.198 | 5.25E-69  | TUBA1C      | 4 | HIST1H4C_plasma cell |
| 1866 | 4.21E-90  | 0.381412954 | 0.726 | 0.143 | 9.18E-86  | GCSH        | 4 | HIST1H4C_plasma cell |
| 1867 | 3.94E-34  | 0.381162728 | 0.958 | 0.519 | 8.60E-30  | SRSF2       | 4 | HIST1H4C_plasma cell |
| 1868 | 3.85E-56  | 0.380957801 | 0.919 | 0.337 | 8.39E-52  | LRPAP1      | 4 | HIST1H4C_plasma cell |
| 1869 | 3.94E-69  | 0.38083037  | 0.884 | 0.278 | 8.59E-65  | NDUFA12     | 4 | HIST1H4C_plasma cell |
| 1870 | 1.98E-84  | 0.380798965 | 0.884 | 0.237 | 4.31E-80  | MRPL22      | 4 | HIST1H4C_plasma cell |
| 1871 | 1.53E-147 | 0.380100846 | 0.683 | 0.057 | 3.35E-143 | RNASEH2A    | 4 | HIST1H4C_plasma cell |
| 1872 | 1.87E-39  | 0.37989162  | 0.931 | 0.378 | 4.08E-35  | CD27        | 4 | HIST1H4C_plasma cell |
| 1873 | 2.84E-83  | 0.379737985 | 0.83  | 0.219 | 6.20E-79  | CLPP        | 4 | HIST1H4C_plasma cell |
| 1874 | 1.57E-64  | 0.379487795 | 0.834 | 0.262 | 3.43E-60  | EIF4G1      | 4 | HIST1H4C_plasma cell |
| 1875 | 8.46E-68  | 0.379327191 | 0.884 | 0.276 | 1.84E-63  | FDX1        | 4 | HIST1H4C_plasma cell |
| 1876 | 3.02E-83  | 0.379030067 | 0.822 | 0.211 | 6.59E-79  | MRPL14      | 4 | HIST1H4C_plasma cell |
| 1877 | 3.77E-88  | 0.378749774 | 0.849 | 0.209 | 8.22E-84  | CKLF        | 4 | HIST1H4C_plasma cell |
| 1878 | 2.52E-83  | 0.378076242 | 0.795 | 0.182 | 5.50E-79  | MIR4435-2HC | 4 | HIST1H4C_plasma cell |
| 1879 | 4.06E-117 | 0.377822824 | 0.753 | 0.106 | 8.86E-113 | CKS1B       | 4 | HIST1H4C_plasma cell |
| 1880 | 5.70E-218 | 0.377602045 | 0.668 | 0.012 | 1.24E-213 | TRIP13      | 4 | HIST1H4C_plasma cell |
| 1881 | 3.13E-82  | 0.377173089 | 0.772 | 0.182 | 6.82E-78  | SLC25A4     | 4 | HIST1H4C_plasma cell |
| 1882 | 2.87E-69  | 0.376858085 | 0.861 | 0.262 | 6.25E-65  | MRPL41      | 4 | HIST1H4C_plasma cell |
| 1883 | 6.77E-80  | 0.3765419   | 0.853 | 0.222 | 1.48E-75  | TIMM13      | 4 | HIST1H4C_plasma cell |
| 1884 | 6.33E-60  | 0.37618212  | 0.888 | 0.313 | 1.38E-55  | IFNAR2      | 4 | HIST1H4C_plasma cell |
| 1885 | 2.85E-61  | 0.375468144 | 0.911 | 0.317 | 6.23E-57  | SMARCB1     | 4 | HIST1H4C_plasma cell |
| 1886 | 6.15E-91  | 0.375168107 | 0.691 | 0.128 | 1.34E-86  | SEMA4A      | 4 | HIST1H4C_plasma cell |
| 1887 | 1.55E-53  | 0.374981191 | 0.888 | 0.322 | 3.39E-49  | SHMT2       | 4 | HIST1H4C_plasma cell |
| 1888 | 7.93E-103 | 0.373675077 | 0.745 | 0.133 | 1.73E-98  | RPL26L1     | 4 | HIST1H4C_plasma cell |
| 1889 | 5.43E-19  | 0.373606733 | 0.985 | 0.828 | 1.18E-14  | NPM1        | 4 | HIST1H4C_plasma cell |
| 1890 | 2.66E-131 | 0.372658567 | 0.803 | 0.106 | 5.80E-127 | NUDT1       | 4 | HIST1H4C_plasma cell |
| 1891 | 1.47E-89  | 0.371898878 | 0.857 | 0.209 | 3.20E-85  | MCUR1       | 4 | HIST1H4C_plasma cell |
| 1892 | 2.31E-60  | 0.371836484 | 0.911 | 0.308 | 5.03E-56  | SNRPF       | 4 | HIST1H4C_plasma cell |
| 1893 | 4.47E-52  | 0.371088844 | 0.923 | 0.36  | 9.75E-48  | SNRPD3      | 4 | HIST1H4C_plasma cell |
| 1894 | 2.08E-82  | 0.370289029 | 0.838 | 0.203 | 4.53E-78  | SLC1A5      | 4 | HIST1H4C_plasma cell |
| 1895 | 5.44E-61  | 0.369044843 | 0.903 | 0.311 | 1.19E-56  | GADD45GIP   | 4 | HIST1H4C_plasma cell |
| 1896 | 8.79E-187 | 0.368656435 | 0.618 | 0.017 | 1.92E-182 | NCAPG       | 4 | HIST1H4C_plasma cell |
| 1897 | 8.64E-94  | 0.368562422 | 0.776 | 0.161 | 1.88E-89  | MRPS12      | 4 | HIST1H4C_plasma cell |
| 1898 | 1.41E-181 | 0.367741302 | 0.606 | 0.017 | 3.08E-177 | ASF1B       | 4 | HIST1H4C_plasma cell |
| 1899 | 1.95E-24  | 0.366600924 | 0.996 | 0.857 | 4.24E-20  | PFN1        | 4 | HIST1H4C_plasma cell |
| 1900 | 2.24E-32  | 0.366546764 | 0.961 | 0.528 | 4.88E-28  | TRMT112     | 4 | HIST1H4C_plasma cell |
| 1901 | 4.62E-66  | 0.366470332 | 0.896 | 0.295 | 1.01E-61  | UBE2L3      | 4 | HIST1H4C_plasma cell |
| 1902 | 1.40E-76  | 0.365632391 | 0.834 | 0.23  | 3.06E-72  | HSD17B10    | 4 | HIST1H4C_plasma cell |
| 1903 | 6.43E-43  | 0.365255489 | 0.934 | 0.414 | 1.40E-38  | NOP10       | 4 | HIST1H4C_plasma cell |
| 1904 | 3.53E-60  | 0.364682545 | 0.9   | 0.312 | 7.70E-56  | COPZ1       | 4 | HIST1H4C_plasma cell |
| 1905 | 3.24E-78  | 0.364453012 | 0.9   | 0.246 | 7.06E-74  | SPATS2      | 4 | HIST1H4C_plasma cell |
| 1906 | 4.04E-57  | 0.363550837 | 0.892 | 0.3   | 8.82E-53  | DNAJC1      | 4 | HIST1H4C_plasma cell |
| 1907 | 2.74E-42  | 0.363367758 | 0.958 | 0.45  | 5.97E-38  | SF3B2       | 4 | HIST1H4C_plasma cell |
| 1908 | 2.38E-124 | 0.36246685  | 0.718 | 0.09  | 5.18E-120 | RAD51C      | 4 | HIST1H4C_plasma cell |
| 1909 | 1.21E-93  | 0.362051801 | 0.768 | 0.157 | 2.63E-89  | PDXK        | 4 | HIST1H4C_plasma cell |
| 1910 | 1.04E-73  | 0.361374021 | 0.803 | 0.219 | 2.27E-69  | PSMD2       | 4 | HIST1H4C_plasma cell |
| 1911 | 6.69E-78  | 0.360786543 | 0.857 | 0.232 | 1.46E-73  | NCLN        | 4 | HIST1H4C_plasma cell |
| 1912 | 2.51E-26  | 0.36066608  | 0.988 | 0.735 | 5.48E-22  | SERP1       | 4 | HIST1H4C_plasma cell |
| 1913 | 9.15E-193 | 0.36030415  | 0.606 | 0.012 | 2.00E-188 | NCAPH       | 4 | HIST1H4C_plasma cell |
| 1914 | 9.67E-105 | 0.359959359 | 0.768 | 0.133 | 2.11E-100 | SNRN25      | 4 | HIST1H4C_plasma cell |

|      |           |             |       |       |           |           |   |                      |
|------|-----------|-------------|-------|-------|-----------|-----------|---|----------------------|
| 1915 | 1.01E-130 | 0.359805248 | 0.618 | 0.054 | 2.20E-126 | EZH2      | 4 | HIST1H4C_plasma cell |
| 1916 | 7.21E-81  | 0.358801993 | 0.764 | 0.187 | 1.57E-76  | TXNL4A    | 4 | HIST1H4C_plasma cell |
| 1917 | 1.74E-187 | 0.358592699 | 0.614 | 0.016 | 3.79E-183 | NUF2      | 4 | HIST1H4C_plasma cell |
| 1918 | 1.37E-73  | 0.358591169 | 0.931 | 0.271 | 2.99E-69  | ILF3      | 4 | HIST1H4C_plasma cell |
| 1919 | 2.00E-63  | 0.358536683 | 0.865 | 0.271 | 4.35E-59  | EAF2      | 4 | HIST1H4C_plasma cell |
| 1920 | 1.70E-46  | 0.358408813 | 0.938 | 0.386 | 3.71E-42  | PRDX6     | 4 | HIST1H4C_plasma cell |
| 1921 | 4.47E-54  | 0.358127896 | 0.946 | 0.347 | 9.76E-50  | SDF4      | 4 | HIST1H4C_plasma cell |
| 1922 | 3.09E-76  | 0.35788908  | 0.857 | 0.239 | 6.75E-72  | ETFA      | 4 | HIST1H4C_plasma cell |
| 1923 | 2.60E-85  | 0.357447068 | 0.846 | 0.211 | 5.66E-81  | SSSCA1    | 4 | HIST1H4C_plasma cell |
| 1924 | 5.35E-48  | 0.356780855 | 0.907 | 0.36  | 1.17E-43  | BSG       | 4 | HIST1H4C_plasma cell |
| 1925 | 2.16E-59  | 0.356725851 | 0.903 | 0.318 | 4.72E-55  | DYNLRB1   | 4 | HIST1H4C_plasma cell |
| 1926 | 3.32E-63  | 0.356692894 | 0.934 | 0.316 | 7.24E-59  | SRP54     | 4 | HIST1H4C_plasma cell |
| 1927 | 5.47E-30  | 0.356609744 | 0.954 | 0.494 | 1.19E-25  | CHCHD10   | 4 | HIST1H4C_plasma cell |
| 1928 | 3.94E-81  | 0.356585029 | 0.815 | 0.198 | 8.58E-77  | MARS      | 4 | HIST1H4C_plasma cell |
| 1929 | 9.34E-34  | 0.356522182 | 0.958 | 0.48  | 2.04E-29  | SERBP1    | 4 | HIST1H4C_plasma cell |
| 1930 | 2.43E-58  | 0.356481932 | 0.869 | 0.295 | 5.29E-54  | TXNDC15   | 4 | HIST1H4C_plasma cell |
| 1931 | 1.09E-92  | 0.356452151 | 0.714 | 0.135 | 2.37E-88  | IFI27L1   | 4 | HIST1H4C_plasma cell |
| 1932 | 1.67E-32  | 0.354510768 | 0.954 | 0.481 | 3.64E-28  | ATP5I     | 4 | HIST1H4C_plasma cell |
| 1933 | 9.54E-48  | 0.353227833 | 0.865 | 0.294 | 2.08E-43  | NUCB2     | 4 | HIST1H4C_plasma cell |
| 1934 | 1.92E-186 | 0.352937339 | 0.583 | 0.01  | 4.19E-182 | AURKB     | 4 | HIST1H4C_plasma cell |
| 1935 | 5.51E-59  | 0.352448066 | 0.795 | 0.245 | 1.20E-54  | B4GALT3   | 4 | HIST1H4C_plasma cell |
| 1936 | 1.63E-42  | 0.35241707  | 0.915 | 0.391 | 3.55E-38  | RBBP4     | 4 | HIST1H4C_plasma cell |
| 1937 | 1.65E-78  | 0.352394297 | 0.846 | 0.23  | 3.60E-74  | MRPL40    | 4 | HIST1H4C_plasma cell |
| 1938 | 1.83E-78  | 0.352247928 | 0.849 | 0.221 | 3.98E-74  | SNRPA     | 4 | HIST1H4C_plasma cell |
| 1939 | 2.53E-122 | 0.351696223 | 0.668 | 0.075 | 5.52E-118 | CDKN2A    | 4 | HIST1H4C_plasma cell |
| 1940 | 8.54E-92  | 0.351306556 | 0.73  | 0.141 | 1.86E-87  | EEF1E1    | 4 | HIST1H4C_plasma cell |
| 1941 | 3.89E-29  | 0.350985265 | 0.977 | 0.634 | 8.49E-25  | ERP29     | 4 | HIST1H4C_plasma cell |
| 1942 | 2.09E-100 | 0.350380562 | 0.83  | 0.174 | 4.55E-96  | PSMC2     | 4 | HIST1H4C_plasma cell |
| 1943 | 5.29E-61  | 0.350264397 | 0.888 | 0.284 | 1.15E-56  | CBWD5     | 4 | HIST1H4C_plasma cell |
| 1944 | 8.26E-29  | 0.349962171 | 0.965 | 0.535 | 1.80E-24  | ATP6V0B   | 4 | HIST1H4C_plasma cell |
| 1945 | 1.25E-54  | 0.349519337 | 0.907 | 0.33  | 2.73E-50  | HNRNPR    | 4 | HIST1H4C_plasma cell |
| 1946 | 1.46E-97  | 0.349516696 | 0.788 | 0.158 | 3.18E-93  | C11orf98  | 4 | HIST1H4C_plasma cell |
| 1947 | 1.32E-70  | 0.349358395 | 0.811 | 0.226 | 2.88E-66  | ZNF593    | 4 | HIST1H4C_plasma cell |
| 1948 | 2.62E-130 | 0.349331985 | 0.653 | 0.062 | 5.71E-126 | RRM1      | 4 | HIST1H4C_plasma cell |
| 1949 | 5.56E-112 | 0.349186832 | 0.788 | 0.128 | 1.21E-107 | CARHSP1   | 4 | HIST1H4C_plasma cell |
| 1950 | 4.50E-83  | 0.349069629 | 0.842 | 0.193 | 9.82E-79  | TMPO      | 4 | HIST1H4C_plasma cell |
| 1951 | 1.77E-79  | 0.349029204 | 0.521 | 0.074 | 3.86E-75  | HIST1H2AE | 4 | HIST1H4C_plasma cell |
| 1952 | 1.28E-84  | 0.348791723 | 0.811 | 0.196 | 2.79E-80  | EMC6      | 4 | HIST1H4C_plasma cell |
| 1953 | 1.08E-68  | 0.348734395 | 0.884 | 0.283 | 2.34E-64  | RNASEH2C  | 4 | HIST1H4C_plasma cell |
| 1954 | 3.54E-146 | 0.348428874 | 0.78  | 0.084 | 7.71E-142 | VRK1      | 4 | HIST1H4C_plasma cell |
| 1955 | 1.30E-76  | 0.348022883 | 0.869 | 0.245 | 2.83E-72  | NDUFS3    | 4 | HIST1H4C_plasma cell |
| 1956 | 4.14E-91  | 0.347960372 | 0.795 | 0.174 | 9.03E-87  | MRPS14    | 4 | HIST1H4C_plasma cell |
| 1957 | 1.22E-112 | 0.347588817 | 0.618 | 0.068 | 2.66E-108 | HELLS     | 4 | HIST1H4C_plasma cell |
| 1958 | 1.86E-73  | 0.347230089 | 0.896 | 0.258 | 4.07E-69  | TRABD     | 4 | HIST1H4C_plasma cell |
| 1959 | 4.54E-31  | 0.346856248 | 0.992 | 0.787 | 9.90E-27  | MYL6      | 4 | HIST1H4C_plasma cell |
| 1960 | 7.84E-62  | 0.346774357 | 0.641 | 0.155 | 1.71E-57  | BIK       | 4 | HIST1H4C_plasma cell |
| 1961 | 1.06E-155 | 0.345952306 | 0.552 | 0.02  | 2.31E-151 | CDT1      | 4 | HIST1H4C_plasma cell |
| 1962 | 7.80E-82  | 0.345772976 | 0.795 | 0.193 | 1.70E-77  | HINT2     | 4 | HIST1H4C_plasma cell |
| 1963 | 2.28E-23  | 0.345274025 | 0.992 | 0.939 | 4.97E-19  | HLA-A     | 4 | HIST1H4C_plasma cell |
| 1964 | 3.48E-74  | 0.344979866 | 0.795 | 0.209 | 7.60E-70  | COPG1     | 4 | HIST1H4C_plasma cell |
| 1965 | 3.30E-102 | 0.344736314 | 0.699 | 0.109 | 7.20E-98  | CDC25B    | 4 | HIST1H4C_plasma cell |
| 1966 | 1.24E-44  | 0.344728721 | 0.958 | 0.414 | 2.71E-40  | C14orf166 | 4 | HIST1H4C_plasma cell |
| 1967 | 2.82E-93  | 0.344567251 | 0.857 | 0.195 | 6.16E-89  | UCHL5     | 4 | HIST1H4C_plasma cell |
| 1968 | 4.83E-86  | 0.344027505 | 0.849 | 0.203 | 1.05E-81  | STT3B     | 4 | HIST1H4C_plasma cell |
| 1969 | 1.19E-47  | 0.343100347 | 0.931 | 0.385 | 2.59E-43  | XRCC6     | 4 | HIST1H4C_plasma cell |
| 1970 | 5.56E-187 | 0.342987361 | 0.587 | 0.011 | 1.21E-182 | CDCA5     | 4 | HIST1H4C_plasma cell |
| 1971 | 1.16E-83  | 0.342214198 | 0.83  | 0.206 | 2.54E-79  | PSMB5     | 4 | HIST1H4C_plasma cell |
| 1972 | 8.31E-78  | 0.341776165 | 0.78  | 0.19  | 1.81E-73  | GSPT1     | 4 | HIST1H4C_plasma cell |
| 1973 | 3.57E-113 | 0.341215654 | 0.448 | 0.023 | 7.79E-109 | HIST1H3B  | 4 | HIST1H4C_plasma cell |
| 1974 | 9.03E-56  | 0.340492109 | 0.861 | 0.299 | 1.97E-51  | GORASP2   | 4 | HIST1H4C_plasma cell |
| 1975 | 4.46E-97  | 0.340306609 | 0.703 | 0.118 | 9.72E-93  | TRAP1     | 4 | HIST1H4C_plasma cell |
| 1976 | 7.12E-74  | 0.340145232 | 0.861 | 0.249 | 1.55E-69  | GPAA1     | 4 | HIST1H4C_plasma cell |
| 1977 | 3.65E-61  | 0.339422479 | 0.83  | 0.249 | 7.95E-57  | ITGB7     | 4 | HIST1H4C_plasma cell |
| 1978 | 2.45E-72  | 0.339090507 | 0.834 | 0.234 | 5.35E-68  | ATOX1     | 4 | HIST1H4C_plasma cell |
| 1979 | 4.77E-97  | 0.338030632 | 0.757 | 0.143 | 1.04E-92  | YARS      | 4 | HIST1H4C_plasma cell |
| 1980 | 1.59E-22  | 0.337603347 | 0.977 | 0.811 | 3.47E-18  | CFL1      | 4 | HIST1H4C_plasma cell |
| 1981 | 3.21E-65  | 0.337000847 | 0.853 | 0.262 | 6.99E-61  | POLR2E    | 4 | HIST1H4C_plasma cell |
| 1982 | 2.79E-52  | 0.336860892 | 0.911 | 0.357 | 6.09E-48  | SF3B6     | 4 | HIST1H4C_plasma cell |
| 1983 | 4.68E-109 | 0.336847287 | 0.707 | 0.1   | 1.02E-104 | DNAJC9    | 4 | HIST1H4C_plasma cell |
| 1984 | 1.57E-73  | 0.336619921 | 0.861 | 0.247 | 3.42E-69  | PDAP1     | 4 | HIST1H4C_plasma cell |
| 1985 | 1.36E-135 | 0.336586888 | 0.672 | 0.062 | 2.96E-131 | RFC4      | 4 | HIST1H4C_plasma cell |

|      |           |             |       |       |           |           |   |                      |
|------|-----------|-------------|-------|-------|-----------|-----------|---|----------------------|
| 1986 | 1.07E-79  | 0.336502637 | 0.834 | 0.209 | 2.34E-75  | SYNCRIP   | 4 | HIST1H4C_plasma cell |
| 1987 | 4.55E-47  | 0.336201555 | 0.942 | 0.386 | 9.93E-43  | YWHAQ     | 4 | HIST1H4C_plasma cell |
| 1988 | 2.35E-69  | 0.336186767 | 0.822 | 0.239 | 5.12E-65  | ACO2      | 4 | HIST1H4C_plasma cell |
| 1989 | 1.02E-114 | 0.3358131   | 0.544 | 0.045 | 2.22E-110 | MCM6      | 4 | HIST1H4C_plasma cell |
| 1990 | 9.25E-86  | 0.335780906 | 0.788 | 0.181 | 2.02E-81  | FTSJ1     | 4 | HIST1H4C_plasma cell |
| 1991 | 1.02E-64  | 0.33467782  | 0.834 | 0.241 | 2.22E-60  | SLC44A1   | 4 | HIST1H4C_plasma cell |
| 1992 | 1.03E-134 | 0.334499934 | 0.579 | 0.04  | 2.24E-130 | PRC1      | 4 | HIST1H4C_plasma cell |
| 1993 | 8.41E-84  | 0.334251202 | 0.78  | 0.178 | 1.83E-79  | SDHB      | 4 | HIST1H4C_plasma cell |
| 1994 | 4.38E-56  | 0.334026179 | 0.737 | 0.215 | 9.54E-52  | GAS6      | 4 | HIST1H4C_plasma cell |
| 1995 | 1.31E-52  | 0.333404744 | 0.857 | 0.29  | 2.85E-48  | NASP      | 4 | HIST1H4C_plasma cell |
| 1996 | 1.40E-11  | 0.333189302 | 0.996 | 0.977 | 3.06E-07  | TMSB10    | 4 | HIST1H4C_plasma cell |
| 1997 | 6.46E-57  | 0.333115904 | 0.873 | 0.295 | 1.41E-52  | GNL3      | 4 | HIST1H4C_plasma cell |
| 1998 | 2.64E-46  | 0.332763499 | 0.946 | 0.418 | 5.77E-42  | CSNK2B    | 4 | HIST1H4C_plasma cell |
| 1999 | 1.79E-77  | 0.33195926  | 0.502 | 0.069 | 3.91E-73  | HIST1H2BF | 4 | HIST1H4C_plasma cell |
| 2000 | 1.47E-81  | 0.331230501 | 0.826 | 0.2   | 3.20E-77  | CASP3     | 4 | HIST1H4C_plasma cell |
| 2001 | 2.17E-28  | 0.330520428 | 0.942 | 0.438 | 4.73E-24  | ERGIC3    | 4 | HIST1H4C_plasma cell |
| 2002 | 1.10E-74  | 0.330487346 | 0.826 | 0.221 | 2.39E-70  | TMED3     | 4 | HIST1H4C_plasma cell |
| 2003 | 5.38E-102 | 0.32913093  | 0.784 | 0.141 | 1.17E-97  | MRPL13    | 4 | HIST1H4C_plasma cell |
| 2004 | 7.91E-60  | 0.328338312 | 0.919 | 0.319 | 1.72E-55  | SSBP1     | 4 | HIST1H4C_plasma cell |
| 2005 | 6.32E-52  | 0.328166983 | 0.907 | 0.345 | 1.38E-47  | FAM96B    | 4 | HIST1H4C_plasma cell |
| 2006 | 1.04E-69  | 0.328044452 | 0.869 | 0.254 | 2.26E-65  | FUNDC2    | 4 | HIST1H4C_plasma cell |
| 2007 | 5.71E-80  | 0.327886443 | 0.834 | 0.214 | 1.25E-75  | TMEM160   | 4 | HIST1H4C_plasma cell |
| 2008 | 5.64E-87  | 0.327397171 | 0.707 | 0.137 | 1.23E-82  | TOMM40    | 4 | HIST1H4C_plasma cell |
| 2009 | 1.55E-62  | 0.326983808 | 0.884 | 0.273 | 3.37E-58  | CD59      | 4 | HIST1H4C_plasma cell |
| 2010 | 3.58E-67  | 0.32665307  | 0.768 | 0.201 | 7.82E-63  | WARS      | 4 | HIST1H4C_plasma cell |
| 2011 | 3.66E-111 | 0.325977758 | 0.707 | 0.102 | 7.99E-107 | GOT2      | 4 | HIST1H4C_plasma cell |
| 2012 | 7.09E-68  | 0.325247801 | 0.857 | 0.247 | 1.55E-63  | CBWD2     | 4 | HIST1H4C_plasma cell |
| 2013 | 7.01E-42  | 0.324352869 | 0.691 | 0.224 | 1.53E-37  | H1FX      | 4 | HIST1H4C_plasma cell |
| 2014 | 2.92E-108 | 0.323965822 | 0.776 | 0.127 | 6.36E-104 | CBX5      | 4 | HIST1H4C_plasma cell |
| 2015 | 6.51E-59  | 0.32396194  | 0.888 | 0.297 | 1.42E-54  | WBSCR22   | 4 | HIST1H4C_plasma cell |
| 2016 | 3.05E-74  | 0.323221035 | 0.853 | 0.237 | 6.64E-70  | FAM136A   | 4 | HIST1H4C_plasma cell |
| 2017 | 1.56E-97  | 0.322755692 | 0.707 | 0.117 | 3.40E-93  | MTFP1     | 4 | HIST1H4C_plasma cell |
| 2018 | 1.41E-124 | 0.322708158 | 0.73  | 0.09  | 3.07E-120 | SAE1      | 4 | HIST1H4C_plasma cell |
| 2019 | 1.80E-19  | 0.322603271 | 0.981 | 0.612 | 3.93E-15  | TMBIM6    | 4 | HIST1H4C_plasma cell |
| 2020 | 2.05E-33  | 0.322599713 | 0.969 | 0.518 | 4.47E-29  | SRSF3     | 4 | HIST1H4C_plasma cell |
| 2021 | 9.29E-79  | 0.322520129 | 0.857 | 0.226 | 2.03E-74  | DECRI     | 4 | HIST1H4C_plasma cell |
| 2022 | 5.75E-26  | 0.321164856 | 0.985 | 0.596 | 1.25E-21  | EDF1      | 4 | HIST1H4C_plasma cell |
| 2023 | 8.34E-84  | 0.319831752 | 0.741 | 0.159 | 1.82E-79  | AARS      | 4 | HIST1H4C_plasma cell |
| 2024 | 3.30E-94  | 0.318871664 | 0.722 | 0.131 | 7.19E-90  | ACAT1     | 4 | HIST1H4C_plasma cell |
| 2025 | 5.91E-41  | 0.318317017 | 0.915 | 0.398 | 1.29E-36  | VDAC2     | 4 | HIST1H4C_plasma cell |
| 2026 | 1.11E-30  | 0.317656467 | 0.973 | 0.533 | 2.42E-26  | SNU13     | 4 | HIST1H4C_plasma cell |
| 2027 | 1.54E-79  | 0.317484308 | 0.857 | 0.224 | 3.35E-75  | NUDT21    | 4 | HIST1H4C_plasma cell |
| 2028 | 1.13E-80  | 0.316892764 | 0.842 | 0.215 | 2.47E-76  | COP3      | 4 | HIST1H4C_plasma cell |
| 2029 | 2.62E-48  | 0.316850545 | 0.892 | 0.335 | 5.72E-44  | TOR3A     | 4 | HIST1H4C_plasma cell |
| 2030 | 4.11E-44  | 0.316777326 | 0.919 | 0.39  | 8.97E-40  | NEDD8     | 4 | HIST1H4C_plasma cell |
| 2031 | 7.18E-49  | 0.316721675 | 0.942 | 0.372 | 1.57E-44  | COX17     | 4 | HIST1H4C_plasma cell |
| 2032 | 1.13E-92  | 0.316636319 | 0.73  | 0.133 | 2.47E-88  | SMC1A     | 4 | HIST1H4C_plasma cell |
| 2033 | 1.30E-168 | 0.316149926 | 0.66  | 0.034 | 2.83E-164 | CENPN     | 4 | HIST1H4C_plasma cell |
| 2034 | 1.14E-66  | 0.315542246 | 0.869 | 0.257 | 2.48E-62  | CDV3      | 4 | HIST1H4C_plasma cell |
| 2035 | 1.37E-63  | 0.315498261 | 0.869 | 0.273 | 2.98E-59  | YIF1A     | 4 | HIST1H4C_plasma cell |
| 2036 | 2.56E-63  | 0.315248107 | 0.792 | 0.226 | 5.59E-59  | SEC24D    | 4 | HIST1H4C_plasma cell |
| 2037 | 8.67E-164 | 0.314887201 | 0.595 | 0.023 | 1.89E-159 | TROAP     | 4 | HIST1H4C_plasma cell |
| 2038 | 3.02E-41  | 0.314866941 | 0.969 | 0.428 | 6.59E-37  | PARP1     | 4 | HIST1H4C_plasma cell |
| 2039 | 1.91E-56  | 0.314618473 | 0.88  | 0.31  | 4.18E-52  | SEC63     | 4 | HIST1H4C_plasma cell |
| 2040 | 2.23E-37  | 0.314514524 | 0.942 | 0.418 | 4.87E-33  | REEP5     | 4 | HIST1H4C_plasma cell |
| 2041 | 1.34E-102 | 0.314082556 | 0.78  | 0.143 | 2.92E-98  | RUVBL2    | 4 | HIST1H4C_plasma cell |
| 2042 | 1.37E-48  | 0.313888296 | 0.834 | 0.312 | 2.99E-44  | MRPL20    | 4 | HIST1H4C_plasma cell |
| 2043 | 4.57E-66  | 0.313738669 | 0.88  | 0.278 | 9.97E-62  | EMC4      | 4 | HIST1H4C_plasma cell |
| 2044 | 1.46E-25  | 0.313658334 | 0.969 | 0.56  | 3.18E-21  | RPS27L    | 4 | HIST1H4C_plasma cell |
| 2045 | 6.31E-53  | 0.313465122 | 0.931 | 0.342 | 1.38E-48  | NDUFB1    | 4 | HIST1H4C_plasma cell |
| 2046 | 3.61E-69  | 0.313384552 | 0.884 | 0.275 | 7.87E-65  | MRPL43    | 4 | HIST1H4C_plasma cell |
| 2047 | 1.17E-53  | 0.312860525 | 0.903 | 0.315 | 2.55E-49  | ABRACL    | 4 | HIST1H4C_plasma cell |
| 2048 | 1.28E-57  | 0.312345796 | 0.849 | 0.273 | 2.78E-53  | SLC38A10  | 4 | HIST1H4C_plasma cell |
| 2049 | 2.18E-95  | 0.311997368 | 0.668 | 0.109 | 4.76E-91  | MRPL17    | 4 | HIST1H4C_plasma cell |
| 2050 | 6.64E-55  | 0.311541577 | 0.896 | 0.314 | 1.45E-50  | TOMM22    | 4 | HIST1H4C_plasma cell |
| 2051 | 1.31E-34  | 0.311531933 | 0.942 | 0.445 | 2.86E-30  | JTB       | 4 | HIST1H4C_plasma cell |
| 2052 | 2.42E-71  | 0.310966335 | 0.865 | 0.254 | 5.28E-67  | DCTN3     | 4 | HIST1H4C_plasma cell |
| 2053 | 4.74E-80  | 0.31088422  | 0.753 | 0.172 | 1.03E-75  | LAP3      | 4 | HIST1H4C_plasma cell |
| 2054 | 2.42E-89  | 0.310856521 | 0.822 | 0.18  | 5.27E-85  | USP14     | 4 | HIST1H4C_plasma cell |
| 2055 | 4.62E-81  | 0.310801018 | 0.741 | 0.163 | 1.01E-76  | CLPTM1L   | 4 | HIST1H4C_plasma cell |
| 2056 | 3.12E-56  | 0.310276723 | 0.857 | 0.291 | 6.80E-52  | RNH1      | 4 | HIST1H4C_plasma cell |

|      |           |             |       |       |           |           |   |                      |
|------|-----------|-------------|-------|-------|-----------|-----------|---|----------------------|
| 2057 | 1.29E-90  | 0.310121112 | 0.741 | 0.143 | 2.82E-86  | TARS      | 4 | HIST1H4C_plasma cell |
| 2058 | 8.80E-91  | 0.309979652 | 0.741 | 0.144 | 1.92E-86  | POLR2H    | 4 | HIST1H4C_plasma cell |
| 2059 | 5.09E-78  | 0.309903171 | 0.784 | 0.19  | 1.11E-73  | ALG3      | 4 | HIST1H4C_plasma cell |
| 2060 | 8.28E-53  | 0.309552237 | 0.892 | 0.336 | 1.81E-48  | ATP5H     | 4 | HIST1H4C_plasma cell |
| 2061 | 1.58E-39  | 0.309265569 | 0.907 | 0.384 | 3.44E-35  | RALY      | 4 | HIST1H4C_plasma cell |
| 2062 | 2.25E-154 | 0.309237048 | 0.541 | 0.018 | 4.91E-150 | CDCA3     | 4 | HIST1H4C_plasma cell |
| 2063 | 2.05E-62  | 0.309014632 | 0.861 | 0.275 | 4.48E-58  | MCTS1     | 4 | HIST1H4C_plasma cell |
| 2064 | 5.61E-103 | 0.308844874 | 0.583 | 0.069 | 1.22E-98  | CTNNAL1   | 4 | HIST1H4C_plasma cell |
| 2065 | 3.94E-66  | 0.308498432 | 0.876 | 0.264 | 8.60E-62  | LSM2      | 4 | HIST1H4C_plasma cell |
| 2066 | 8.74E-82  | 0.307980489 | 0.734 | 0.159 | 1.91E-77  | MRPL36    | 4 | HIST1H4C_plasma cell |
| 2067 | 3.51E-18  | 0.307966286 | 0.981 | 0.69  | 7.65E-14  | ISG20     | 4 | HIST1H4C_plasma cell |
| 2068 | 5.61E-37  | 0.307579607 | 0.973 | 0.457 | 1.22E-32  | C11orf31  | 4 | HIST1H4C_plasma cell |
| 2069 | 9.44E-74  | 0.306718856 | 0.772 | 0.195 | 2.06E-69  | MRPL34    | 4 | HIST1H4C_plasma cell |
| 2070 | 4.08E-55  | 0.306672442 | 0.931 | 0.336 | 8.90E-51  | ENY2      | 4 | HIST1H4C_plasma cell |
| 2071 | 2.26E-80  | 0.305843312 | 0.768 | 0.179 | 4.92E-76  | DPM2      | 4 | HIST1H4C_plasma cell |
| 2072 | 5.30E-67  | 0.305761949 | 0.822 | 0.232 | 1.16E-62  | PSMB7     | 4 | HIST1H4C_plasma cell |
| 2073 | 5.67E-53  | 0.305447453 | 0.9   | 0.326 | 1.24E-48  | RBM17     | 4 | HIST1H4C_plasma cell |
| 2074 | 2.72E-74  | 0.305377782 | 0.795 | 0.206 | 5.93E-70  | SUCLG1    | 4 | HIST1H4C_plasma cell |
| 2075 | 1.12E-155 | 0.304661171 | 0.533 | 0.016 | 2.45E-151 | DIAPH3    | 4 | HIST1H4C_plasma cell |
| 2076 | 1.90E-132 | 0.304106193 | 0.571 | 0.037 | 4.14E-128 | ATAD2     | 4 | HIST1H4C_plasma cell |
| 2077 | 2.41E-99  | 0.302668334 | 0.807 | 0.155 | 5.26E-95  | ADSL      | 4 | HIST1H4C_plasma cell |
| 2078 | 1.13E-129 | 0.302608234 | 0.556 | 0.036 | 2.47E-125 | FBXO5     | 4 | HIST1H4C_plasma cell |
| 2079 | 8.80E-92  | 0.302598019 | 0.772 | 0.161 | 1.92E-87  | MRPS18C   | 4 | HIST1H4C_plasma cell |
| 2080 | 4.70E-60  | 0.302552403 | 0.822 | 0.251 | 1.02E-55  | SLC39A7   | 4 | HIST1H4C_plasma cell |
| 2081 | 1.49E-30  | 0.301090177 | 0.911 | 0.458 | 3.25E-26  | TUBB4B    | 4 | HIST1H4C_plasma cell |
| 2082 | 8.55E-150 | 0.300535683 | 0.506 | 0.014 | 1.87E-145 | CLSPN     | 4 | HIST1H4C_plasma cell |
| 2083 | 6.31E-42  | 0.300333351 | 0.95  | 0.405 | 1.38E-37  | DBI       | 4 | HIST1H4C_plasma cell |
| 2084 | 6.34E-84  | 0.299588312 | 0.83  | 0.2   | 1.38E-79  | MRPL38    | 4 | HIST1H4C_plasma cell |
| 2085 | 6.51E-43  | 0.299348801 | 0.927 | 0.388 | 1.42E-38  | SHFM1     | 4 | HIST1H4C_plasma cell |
| 2086 | 6.61E-73  | 0.299265852 | 0.541 | 0.087 | 1.44E-68  | HIST1H2AM | 4 | HIST1H4C_plasma cell |
| 2087 | 1.36E-75  | 0.298622859 | 0.849 | 0.219 | 2.97E-71  | CCT5      | 4 | HIST1H4C_plasma cell |
| 2088 | 7.73E-26  | 0.298497799 | 0.965 | 0.522 | 1.68E-21  | VCP       | 4 | HIST1H4C_plasma cell |
| 2089 | 5.34E-35  | 0.298322264 | 0.911 | 0.388 | 1.16E-30  | TM9SF2    | 4 | HIST1H4C_plasma cell |
| 2090 | 1.40E-53  | 0.298060766 | 0.896 | 0.31  | 3.06E-49  | TAP1      | 4 | HIST1H4C_plasma cell |
| 2091 | 9.15E-72  | 0.297910197 | 0.865 | 0.245 | 2.00E-67  | RTN3      | 4 | HIST1H4C_plasma cell |
| 2092 | 2.29E-178 | 0.297752122 | 0.51  | 0.003 | 5.00E-174 | CENPA     | 4 | HIST1H4C_plasma cell |
| 2093 | 1.69E-27  | 0.29754082  | 0.981 | 0.556 | 3.69E-23  | YWHAB     | 4 | HIST1H4C_plasma cell |
| 2094 | 1.88E-48  | 0.297389665 | 0.915 | 0.344 | 4.11E-44  | AKR1A1    | 4 | HIST1H4C_plasma cell |
| 2095 | 1.43E-74  | 0.297382262 | 0.822 | 0.211 | 3.13E-70  | MRPL4     | 4 | HIST1H4C_plasma cell |
| 2096 | 5.94E-105 | 0.296980114 | 0.695 | 0.103 | 1.29E-100 | HADH      | 4 | HIST1H4C_plasma cell |
| 2097 | 2.88E-50  | 0.296827719 | 0.865 | 0.306 | 6.29E-46  | UBE2G1    | 4 | HIST1H4C_plasma cell |
| 2098 | 1.60E-66  | 0.296640915 | 0.88  | 0.264 | 3.50E-62  | GTF2A2    | 4 | HIST1H4C_plasma cell |
| 2099 | 1.80E-87  | 0.296563241 | 0.672 | 0.12  | 3.93E-83  | ALG14     | 4 | HIST1H4C_plasma cell |
| 2100 | 1.83E-81  | 0.295388609 | 0.807 | 0.189 | 3.99E-77  | NDUFC2    | 4 | HIST1H4C_plasma cell |
| 2101 | 1.94E-68  | 0.295199902 | 0.861 | 0.254 | 4.23E-64  | SSNA1     | 4 | HIST1H4C_plasma cell |
| 2102 | 2.49E-47  | 0.295183639 | 0.931 | 0.362 | 5.43E-43  | TMEM256   | 4 | HIST1H4C_plasma cell |
| 2103 | 4.63E-74  | 0.294459141 | 0.803 | 0.201 | 1.01E-69  | CHST12    | 4 | HIST1H4C_plasma cell |
| 2104 | 1.33E-79  | 0.294180096 | 0.73  | 0.154 | 2.90E-75  | SLC1A4    | 4 | HIST1H4C_plasma cell |
| 2105 | 8.94E-91  | 0.294051715 | 0.641 | 0.101 | 1.95E-86  | C19orf48  | 4 | HIST1H4C_plasma cell |
| 2106 | 3.27E-52  | 0.293932855 | 0.649 | 0.177 | 7.13E-48  | ABCB9     | 4 | HIST1H4C_plasma cell |
| 2107 | 5.24E-28  | 0.29379541  | 0.946 | 0.466 | 1.14E-23  | GUK1      | 4 | HIST1H4C_plasma cell |
| 2108 | 1.01E-84  | 0.293573271 | 0.378 | 0.026 | 2.21E-80  | HIST1H3C  | 4 | HIST1H4C_plasma cell |
| 2109 | 3.60E-75  | 0.293466204 | 0.533 | 0.081 | 7.86E-71  | HIST1H2AG | 4 | HIST1H4C_plasma cell |
| 2110 | 1.06E-68  | 0.292554494 | 0.83  | 0.233 | 2.31E-64  | SRA1      | 4 | HIST1H4C_plasma cell |
| 2111 | 9.20E-123 | 0.292382726 | 0.672 | 0.074 | 2.01E-118 | TFDP1     | 4 | HIST1H4C_plasma cell |
| 2112 | 2.89E-141 | 0.292315113 | 0.49  | 0.016 | 6.29E-137 | CDCA8     | 4 | HIST1H4C_plasma cell |
| 2113 | 4.66E-46  | 0.291752749 | 0.923 | 0.368 | 1.02E-41  | NOP58     | 4 | HIST1H4C_plasma cell |
| 2114 | 4.83E-48  | 0.291477292 | 0.799 | 0.278 | 1.05E-43  | ARFGAP3   | 4 | HIST1H4C_plasma cell |
| 2115 | 2.08E-88  | 0.290853508 | 0.695 | 0.126 | 4.54E-84  | IL6R      | 4 | HIST1H4C_plasma cell |
| 2116 | 3.17E-78  | 0.290821231 | 0.792 | 0.188 | 6.91E-74  | EIF2S1    | 4 | HIST1H4C_plasma cell |
| 2117 | 8.28E-110 | 0.289845816 | 0.49  | 0.035 | 1.81E-105 | SLC43A3   | 4 | HIST1H4C_plasma cell |
| 2118 | 8.43E-71  | 0.289820983 | 0.826 | 0.232 | 1.84E-66  | PSMD11    | 4 | HIST1H4C_plasma cell |
| 2119 | 1.45E-81  | 0.289062572 | 0.822 | 0.195 | 3.16E-77  | MPC2      | 4 | HIST1H4C_plasma cell |
| 2120 | 2.19E-23  | 0.288517774 | 0.969 | 0.655 | 4.77E-19  | SUMO2     | 4 | HIST1H4C_plasma cell |
| 2121 | 2.23E-150 | 0.288323093 | 0.568 | 0.025 | 4.86E-146 | CASC5     | 4 | HIST1H4C_plasma cell |
| 2122 | 6.41E-24  | 0.288216077 | 0.973 | 0.601 | 1.40E-19  | HMGN1     | 4 | HIST1H4C_plasma cell |
| 2123 | 5.61E-22  | 0.288162517 | 1     | 0.844 | 1.22E-17  | ATP5E     | 4 | HIST1H4C_plasma cell |
| 2124 | 7.21E-60  | 0.287936384 | 0.869 | 0.291 | 1.57E-55  | NAA10     | 4 | HIST1H4C_plasma cell |
| 2125 | 1.71E-153 | 0.287839446 | 0.517 | 0.014 | 3.72E-149 | DEPDC1B   | 4 | HIST1H4C_plasma cell |
| 2126 | 3.20E-60  | 0.287600469 | 0.846 | 0.258 | 6.97E-56  | SCAMP2    | 4 | HIST1H4C_plasma cell |
| 2127 | 1.78E-83  | 0.287486533 | 0.815 | 0.186 | 3.89E-79  | PSMD14    | 4 | HIST1H4C_plasma cell |

|      |           |             |       |       |           |           |   |                      |
|------|-----------|-------------|-------|-------|-----------|-----------|---|----------------------|
| 2128 | 1.14E-21  | 0.287272712 | 0.969 | 0.636 | 2.48E-17  | SNRPD2    | 4 | HIST1H4C_plasma cell |
| 2129 | 6.31E-159 | 0.287216317 | 0.525 | 0.013 | 1.38E-154 | CDCA2     | 4 | HIST1H4C_plasma cell |
| 2130 | 1.80E-51  | 0.287188865 | 0.884 | 0.306 | 3.92E-47  | DERL2     | 4 | HIST1H4C_plasma cell |
| 2131 | 1.20E-74  | 0.286676903 | 0.83  | 0.217 | 2.62E-70  | ATG3      | 4 | HIST1H4C_plasma cell |
| 2132 | 3.55E-78  | 0.286604286 | 0.656 | 0.123 | 7.75E-74  | CCR2      | 4 | HIST1H4C_plasma cell |
| 2133 | 7.16E-72  | 0.286452873 | 0.734 | 0.176 | 1.56E-67  | TMEM214   | 4 | HIST1H4C_plasma cell |
| 2134 | 1.29E-87  | 0.286131158 | 0.819 | 0.183 | 2.82E-83  | PPP1R7    | 4 | HIST1H4C_plasma cell |
| 2135 | 2.42E-55  | 0.285883671 | 0.776 | 0.235 | 5.28E-51  | CPNE5     | 4 | HIST1H4C_plasma cell |
| 2136 | 3.08E-74  | 0.285527163 | 0.834 | 0.224 | 6.71E-70  | RPS6KB2   | 4 | HIST1H4C_plasma cell |
| 2137 | 6.68E-45  | 0.285026095 | 0.784 | 0.277 | 1.46E-40  | ITGB1     | 4 | HIST1H4C_plasma cell |
| 2138 | 3.82E-84  | 0.284589409 | 0.822 | 0.191 | 8.34E-80  | COMMD1    | 4 | HIST1H4C_plasma cell |
| 2139 | 6.11E-82  | 0.284559784 | 0.722 | 0.149 | 1.33E-77  | TAF10     | 4 | HIST1H4C_plasma cell |
| 2140 | 9.11E-65  | 0.284522228 | 0.707 | 0.183 | 1.99E-60  | NOLC1     | 4 | HIST1H4C_plasma cell |
| 2141 | 2.90E-179 | 0.284174957 | 0.56  | 0.01  | 6.32E-175 | SPAG5     | 4 | HIST1H4C_plasma cell |
| 2142 | 3.11E-34  | 0.284001177 | 0.942 | 0.447 | 6.77E-30  | GMFG      | 4 | HIST1H4C_plasma cell |
| 2143 | 3.33E-22  | 0.283871505 | 0.973 | 0.593 | 7.27E-18  | PTGES3    | 4 | HIST1H4C_plasma cell |
| 2144 | 4.70E-48  | 0.283140311 | 0.873 | 0.318 | 1.02E-43  | ERGIC2    | 4 | HIST1H4C_plasma cell |
| 2145 | 1.30E-82  | 0.283105487 | 0.807 | 0.185 | 2.83E-78  | MRPL23    | 4 | HIST1H4C_plasma cell |
| 2146 | 8.42E-82  | 0.282944282 | 0.795 | 0.186 | 1.84E-77  | CCDC124   | 4 | HIST1H4C_plasma cell |
| 2147 | 2.03E-85  | 0.282257732 | 0.737 | 0.152 | 4.43E-81  | PDHA1     | 4 | HIST1H4C_plasma cell |
| 2148 | 1.40E-54  | 0.282048679 | 0.873 | 0.297 | 3.05E-50  | NUCB1     | 4 | HIST1H4C_plasma cell |
| 2149 | 9.38E-82  | 0.281437315 | 0.795 | 0.189 | 2.05E-77  | PIN1      | 4 | HIST1H4C_plasma cell |
| 2150 | 1.36E-37  | 0.281296871 | 0.367 | 0.081 | 2.97E-33  | PTP4A3    | 4 | HIST1H4C_plasma cell |
| 2151 | 1.00E-38  | 0.281153432 | 0.78  | 0.282 | 2.19E-34  | S100A10   | 4 | HIST1H4C_plasma cell |
| 2152 | 3.02E-96  | 0.280571182 | 0.51  | 0.052 | 6.58E-92  | SPN       | 4 | HIST1H4C_plasma cell |
| 2153 | 2.56E-42  | 0.280364673 | 0.714 | 0.238 | 5.59E-38  | CHPF      | 4 | HIST1H4C_plasma cell |
| 2154 | 5.93E-66  | 0.280309325 | 0.869 | 0.26  | 1.29E-61  | ELAVL1    | 4 | HIST1H4C_plasma cell |
| 2155 | 8.17E-78  | 0.280037518 | 0.741 | 0.165 | 1.78E-73  | THOC7     | 4 | HIST1H4C_plasma cell |
| 2156 | 3.69E-80  | 0.279802646 | 0.788 | 0.188 | 8.04E-76  | CMC2      | 4 | HIST1H4C_plasma cell |
| 2157 | 1.00E-64  | 0.279291885 | 0.9   | 0.271 | 2.19E-60  | LINC00152 | 4 | HIST1H4C_plasma cell |
| 2158 | 1.18E-72  | 0.27886413  | 0.699 | 0.157 | 2.58E-68  | BAK1      | 4 | HIST1H4C_plasma cell |
| 2159 | 5.30E-64  | 0.278765074 | 0.722 | 0.186 | 1.16E-59  | GRK6      | 4 | HIST1H4C_plasma cell |
| 2160 | 5.62E-30  | 0.278384558 | 0.942 | 0.478 | 1.23E-25  | PSMB9     | 4 | HIST1H4C_plasma cell |
| 2161 | 2.92E-73  | 0.278318279 | 0.71  | 0.161 | 6.36E-69  | HIGD1A    | 4 | HIST1H4C_plasma cell |
| 2162 | 4.55E-65  | 0.278096681 | 0.884 | 0.273 | 9.93E-61  | PCMT1     | 4 | HIST1H4C_plasma cell |
| 2163 | 5.68E-78  | 0.277964577 | 0.834 | 0.214 | 1.24E-73  | TRAPPC2L  | 4 | HIST1H4C_plasma cell |
| 2164 | 1.33E-23  | 0.277704226 | 0.958 | 0.548 | 2.90E-19  | UBL5      | 4 | HIST1H4C_plasma cell |
| 2165 | 1.71E-32  | 0.277146542 | 0.977 | 0.483 | 3.73E-28  | WDR83OS   | 4 | HIST1H4C_plasma cell |
| 2166 | 2.26E-90  | 0.276946565 | 0.73  | 0.136 | 4.93E-86  | PSMD1     | 4 | HIST1H4C_plasma cell |
| 2167 | 1.31E-57  | 0.276903938 | 0.857 | 0.277 | 2.85E-53  | MORF4L2   | 4 | HIST1H4C_plasma cell |
| 2168 | 2.48E-110 | 0.276742973 | 0.405 | 0.016 | 5.41E-106 | CENPE     | 4 | HIST1H4C_plasma cell |
| 2169 | 5.69E-87  | 0.276196588 | 0.66  | 0.116 | 1.24E-82  | SNF8      | 4 | HIST1H4C_plasma cell |
| 2170 | 3.24E-68  | 0.276099331 | 0.792 | 0.207 | 7.07E-64  | CTSC      | 4 | HIST1H4C_plasma cell |
| 2171 | 2.02E-10  | 0.27601838  | 1     | 0.988 | 4.40E-06  | ACTB      | 4 | HIST1H4C_plasma cell |
| 2172 | 5.60E-69  | 0.275999439 | 0.811 | 0.217 | 1.22E-64  | SAR1A     | 4 | HIST1H4C_plasma cell |
| 2173 | 1.84E-39  | 0.275897779 | 0.931 | 0.397 | 4.01E-35  | C19orf53  | 4 | HIST1H4C_plasma cell |
| 2174 | 2.30E-60  | 0.275262513 | 0.869 | 0.278 | 5.02E-56  | RAB8A     | 4 | HIST1H4C_plasma cell |
| 2175 | 1.64E-46  | 0.274738369 | 0.764 | 0.262 | 3.58E-42  | SLAMF7    | 4 | HIST1H4C_plasma cell |
| 2176 | 2.33E-143 | 0.274545319 | 0.571 | 0.031 | 5.08E-139 | PARPBP    | 4 | HIST1H4C_plasma cell |
| 2177 | 2.59E-25  | 0.274035455 | 0.988 | 0.64  | 5.66E-21  | SRGN      | 4 | HIST1H4C_plasma cell |
| 2178 | 9.88E-135 | 0.273405949 | 0.606 | 0.043 | 2.15E-130 | NCAPD3    | 4 | HIST1H4C_plasma cell |
| 2179 | 2.58E-99  | 0.273301492 | 0.722 | 0.122 | 5.62E-95  | ANAPC15   | 4 | HIST1H4C_plasma cell |
| 2180 | 2.79E-55  | 0.272937661 | 0.788 | 0.246 | 6.08E-51  | ADI1      | 4 | HIST1H4C_plasma cell |
| 2181 | 6.56E-73  | 0.272906055 | 0.714 | 0.17  | 1.43E-68  | SRP68     | 4 | HIST1H4C_plasma cell |
| 2182 | 4.02E-58  | 0.272862728 | 0.78  | 0.22  | 8.77E-54  | TPST2     | 4 | HIST1H4C_plasma cell |
| 2183 | 2.11E-16  | 0.272708686 | 1     | 0.991 | 4.60E-12  | PTMA      | 4 | HIST1H4C_plasma cell |
| 2184 | 2.31E-87  | 0.272521952 | 0.795 | 0.165 | 5.03E-83  | H2AFY     | 4 | HIST1H4C_plasma cell |
| 2185 | 1.57E-103 | 0.2724053   | 0.61  | 0.076 | 3.43E-99  | UCK2      | 4 | HIST1H4C_plasma cell |
| 2186 | 9.46E-31  | 0.271891734 | 0.51  | 0.164 | 2.06E-26  | ATF5      | 4 | HIST1H4C_plasma cell |
| 2187 | 5.55E-40  | 0.271858304 | 0.919 | 0.379 | 1.21E-35  | EWSR1     | 4 | HIST1H4C_plasma cell |
| 2188 | 4.80E-80  | 0.271718662 | 0.653 | 0.12  | 1.05E-75  | DENND6B   | 4 | HIST1H4C_plasma cell |
| 2189 | 3.31E-83  | 0.271689471 | 0.78  | 0.167 | 7.22E-79  | POLE3     | 4 | HIST1H4C_plasma cell |
| 2190 | 1.67E-153 | 0.271196309 | 0.475 | 0.007 | 3.65E-149 | HJURP     | 4 | HIST1H4C_plasma cell |
| 2191 | 3.96E-100 | 0.270861297 | 0.737 | 0.124 | 8.64E-96  | MRPL15    | 4 | HIST1H4C_plasma cell |
| 2192 | 1.62E-99  | 0.270698886 | 0.645 | 0.091 | 3.54E-95  | BRI3BP    | 4 | HIST1H4C_plasma cell |
| 2193 | 4.88E-75  | 0.270633997 | 0.761 | 0.179 | 1.06E-70  | PMVK      | 4 | HIST1H4C_plasma cell |
| 2194 | 2.39E-46  | 0.269947835 | 0.896 | 0.336 | 5.21E-42  | ATRAID    | 4 | HIST1H4C_plasma cell |
| 2195 | 5.87E-41  | 0.269871471 | 0.923 | 0.382 | 1.28E-36  | SEC11A    | 4 | HIST1H4C_plasma cell |
| 2196 | 9.95E-69  | 0.269856403 | 0.803 | 0.217 | 2.17E-64  | HSPB1     | 4 | HIST1H4C_plasma cell |
| 2197 | 2.97E-96  | 0.269736855 | 0.622 | 0.085 | 6.48E-92  | POLR3K    | 4 | HIST1H4C_plasma cell |
| 2198 | 9.62E-152 | 0.269464926 | 0.51  | 0.014 | 2.10E-147 | NDC80     | 4 | HIST1H4C_plasma cell |

|      |           |              |       |       |             |           |   |                      |
|------|-----------|--------------|-------|-------|-------------|-----------|---|----------------------|
| 2199 | 3.40E-48  | 0.26911879   | 0.792 | 0.267 | 7.41E-44    | HSPA13    | 4 | HIST1H4C_plasma cell |
| 2200 | 8.11E-32  | 0.268945836  | 0.938 | 0.431 | 1.77E-27    | UFM1      | 4 | HIST1H4C_plasma cell |
| 2201 | 1.25E-109 | 0.268823077  | 0.598 | 0.063 | 2.73E-105   | LIG1      | 4 | HIST1H4C_plasma cell |
| 2202 | 8.68E-48  | 0.26841125   | 0.903 | 0.345 | 1.89E-43    | CCT3      | 4 | HIST1H4C_plasma cell |
| 2203 | 3.64E-65  | 0.268239338  | 0.807 | 0.223 | 7.94E-61    | NUTF2     | 4 | HIST1H4C_plasma cell |
| 2204 | 2.92E-100 | 0.267905688  | 0.726 | 0.121 | 6.37E-96    | DAZAP1    | 4 | HIST1H4C_plasma cell |
| 2205 | 2.58E-100 | 0.267840893  | 0.44  | 0.029 | 5.63E-96    | MCM4      | 4 | HIST1H4C_plasma cell |
| 2206 | 2.42E-58  | 0.267823925  | 0.506 | 0.097 | 5.28E-54    | HIST1H1D  | 4 | HIST1H4C_plasma cell |
| 2207 | 1.32E-80  | 0.267683002  | 0.78  | 0.178 | 2.88E-76    | VBP1      | 4 | HIST1H4C_plasma cell |
| 2208 | 1.09E-79  | 0.2667355    | 0.749 | 0.161 | 2.37E-75    | MRPL28    | 4 | HIST1H4C_plasma cell |
| 2209 | 2.06E-42  | 0.266354832  | 0.903 | 0.357 | 4.50E-38    | PHPT1     | 4 | HIST1H4C_plasma cell |
| 2210 | 3.35E-132 | 0.266261654  | 0.49  | 0.021 | 7.31E-128   | CHEK1     | 4 | HIST1H4C_plasma cell |
| 2211 | 7.10E-65  | 0.26612617   | 0.857 | 0.264 | 1.55E-60    | POLR2K    | 4 | HIST1H4C_plasma cell |
| 2212 | 1.94E-82  | 0.266027276  | 0.486 | 0.057 | 4.24E-78    | HIST1H2AL | 4 | HIST1H4C_plasma cell |
| 2213 | 2.62E-54  | 0.265851103  | 0.834 | 0.28  | 5.71E-50    | TMEM147   | 4 | HIST1H4C_plasma cell |
| 2214 | 2.81E-38  | 0.265270795  | 0.923 | 0.396 | 6.13E-34    | EIF3A     | 4 | HIST1H4C_plasma cell |
| 2215 | 1.66E-18  | 0.265128847  | 0.992 | 0.736 | 3.62E-14    | RPS17     | 4 | HIST1H4C_plasma cell |
| 2216 | 1.76E-38  | 0.2647937    | 0.514 | 0.142 | 3.84E-34    | RNU12     | 4 | HIST1H4C_plasma cell |
| 2217 | 4.38E-67  | 0.264122421  | 0.745 | 0.185 | 9.56E-63    | ENTPD1    | 4 | HIST1H4C_plasma cell |
| 2218 | 3.10E-50  | 0.264079306  | 0.51  | 0.114 | 6.76E-46    | HIST1H2BC | 4 | HIST1H4C_plasma cell |
| 2219 | 9.62E-68  | 0.263905799  | 0.741 | 0.18  | 2.10E-63    | CAPN2     | 4 | HIST1H4C_plasma cell |
| 2220 | 3.75E-91  | 0.263321997  | 0.776 | 0.154 | 8.18E-87    | TIMM10    | 4 | HIST1H4C_plasma cell |
| 2221 | 2.98E-77  | 0.262660349  | 0.803 | 0.189 | 6.51E-73    | HSPB11    | 4 | HIST1H4C_plasma cell |
| 2222 | 3.71E-54  | 0.262563088  | 0.873 | 0.305 | 8.09E-50    | AP2M1     | 4 | HIST1H4C_plasma cell |
| 2223 | 3.09E-31  | 0.262276517  | 0.938 | 0.455 | 6.74E-27    | ARL6IP4   | 4 | HIST1H4C_plasma cell |
| 2224 | 6.14E-44  | 0.261993142  | 0.876 | 0.337 | 1.34E-39    | ERP44     | 4 | HIST1H4C_plasma cell |
| 2225 | 7.91E-101 | 0.261568588  | 0.714 | 0.112 | 1.72E-96    | ICT1      | 4 | HIST1H4C_plasma cell |
| 2226 | 4.68E-182 | 0.261523681  | 0.533 | 0.005 | 1.02E-177   | SPC25     | 4 | HIST1H4C_plasma cell |
| 2227 | 7.91E-80  | 0.261395868  | 0.726 | 0.155 | 1.72E-75    | CHCHD1    | 4 | HIST1H4C_plasma cell |
| 2228 | 2.14E-78  | 0.261265619  | 0.753 | 0.17  | 4.67E-74    | DEF8      | 4 | HIST1H4C_plasma cell |
| 2229 | 4.26E-82  | 0.26037427   | 0.722 | 0.147 | 9.28E-78    | FKBP3     | 4 | HIST1H4C_plasma cell |
| 2230 | 1.43E-104 | 0.26036956   | 0.695 | 0.102 | 3.12E-100   | PAFAH1B3  | 4 | HIST1H4C_plasma cell |
| 2231 | 4.52E-70  | 0.260175357  | 0.83  | 0.227 | 9.85E-66    | MRPL3     | 4 | HIST1H4C_plasma cell |
| 2232 | 1.87E-98  | 0.260069984  | 0.61  | 0.081 | 4.08E-94    | GLRX5     | 4 | HIST1H4C_plasma cell |
| 2233 | 2.72E-56  | 0.259886475  | 0.884 | 0.293 | 5.92E-52    | VPS29     | 4 | HIST1H4C_plasma cell |
| 2234 | 1.93E-39  | 0.259866881  | 0.88  | 0.351 | 4.22E-35    | SLC3A2    | 4 | HIST1H4C_plasma cell |
| 2235 | 3.02E-63  | 0.259577386  | 0.799 | 0.228 | 6.58E-59    | PIGT      | 4 | HIST1H4C_plasma cell |
| 2236 | 5.36E-64  | 0.259139941  | 0.784 | 0.217 | 1.17E-59    | PSMD3     | 4 | HIST1H4C_plasma cell |
| 2237 | 1.36E-73  | 0.258987332  | 0.83  | 0.211 | 2.98E-69    | MRPL16    | 4 | HIST1H4C_plasma cell |
| 2238 | 2.06E-77  | 0.258458981  | 0.714 | 0.15  | 4.50E-73    | DPAGT1    | 4 | HIST1H4C_plasma cell |
| 2239 | 1.79E-80  | 0.258399958  | 0.637 | 0.113 | 3.91E-76    | POLD2     | 4 | HIST1H4C_plasma cell |
| 2240 | 9.31E-75  | 0.25783243   | 0.664 | 0.136 | 2.03E-70    | PRPF19    | 4 | HIST1H4C_plasma cell |
| 2241 | 3.63E-71  | 0.257067834  | 0.718 | 0.167 | 7.92E-67    | IARS      | 4 | HIST1H4C_plasma cell |
| 2242 | 1.09E-61  | 0.256664046  | 0.737 | 0.198 | 2.37E-57    | SEC24A    | 4 | HIST1H4C_plasma cell |
| 2243 | 5.62E-60  | 0.2558636    | 0.834 | 0.26  | 1.23E-55    | UQCRC2    | 4 | HIST1H4C_plasma cell |
| 2244 | 5.00E-83  | 0.255788442  | 0.676 | 0.124 | 1.09E-78    | FXN       | 4 | HIST1H4C_plasma cell |
| 2245 | 5.15E-68  | 0.255598733  | 0.788 | 0.213 | 1.12E-63    | MRPL55    | 4 | HIST1H4C_plasma cell |
| 2246 | 6.75E-161 | 0.255582243  | 0.533 | 0.014 | 1.47E-156   | OIP5      | 4 | HIST1H4C_plasma cell |
| 2247 | 1.30E-72  | 0.254544854  | 0.676 | 0.146 | 2.84E-68    | COMTD1    | 4 | HIST1H4C_plasma cell |
| 2248 | 3.42E-123 | 0.254492231  | 0.444 | 0.016 | 7.45E-119   | CDC45     | 4 | HIST1H4C_plasma cell |
| 2249 | 1.77E-56  | 0.254192238  | 0.876 | 0.285 | 3.86E-52    | CLTA      | 4 | HIST1H4C_plasma cell |
| 2250 | 9.19E-51  | 0.253933326  | 0.896 | 0.321 | 2.00E-46    | EIF1AX    | 4 | HIST1H4C_plasma cell |
| 2251 | 1.34E-38  | 0.253925102  | 0.919 | 0.409 | 2.91E-34    | RAC1      | 4 | HIST1H4C_plasma cell |
| 2252 | 1.12E-51  | 0.253281767  | 0.88  | 0.313 | 2.43E-47    | ACP1      | 4 | HIST1H4C_plasma cell |
| 2253 | 5.42E-111 | 0.253053574  | 0.382 | 0.011 | 1.18E-106   | UHRF1     | 4 | HIST1H4C_plasma cell |
| 2254 | 2.97E-93  | 0.252961384  | 0.788 | 0.15  | 6.48E-89    | HAT1      | 4 | HIST1H4C_plasma cell |
| 2255 | 9.56E-49  | 0.252752531  | 0.938 | 0.349 | 2.09E-44    | TMEM50A   | 4 | HIST1H4C_plasma cell |
| 2256 | 2.67E-46  | 0.252410133  | 0.931 | 0.351 | 5.82E-42    | ARPC5     | 4 | HIST1H4C_plasma cell |
| 2257 | 8.28E-107 | 0.252234279  | 0.664 | 0.086 | 1.81E-102   | ACAT2     | 4 | HIST1H4C_plasma cell |
| 2258 | 2.37E-32  | 0.251934133  | 0.521 | 0.17  | 5.16E-28    | SDC1      | 4 | HIST1H4C_plasma cell |
| 2259 | 3.55E-39  | 0.251885852  | 0.9   | 0.37  | 7.75E-35    | PRMT1     | 4 | HIST1H4C_plasma cell |
| 2260 | 6.13E-85  | 0.251807161  | 0.707 | 0.135 | 1.34E-80    | SFXN1     | 4 | HIST1H4C_plasma cell |
| 2261 | 8.78E-74  | 0.250863655  | 0.749 | 0.175 | 1.91E-69    | DCUN1D5   | 4 | HIST1H4C_plasma cell |
| 2262 | 1.19E-68  | 0.250376014  | 0.826 | 0.227 | 2.60E-64    | PSMD9     | 4 | HIST1H4C_plasma cell |
| 2263 | 1.49E-10  | -0.250949088 | 0.486 | 0.215 | 3.24E-06    | HMHA1     | 4 | HIST1H4C_plasma cell |
| 2264 | 7.60E-09  | -0.251278385 | 0.425 | 0.198 | 0.00016566  | INTS6     | 4 | HIST1H4C_plasma cell |
| 2265 | 1.18E-09  | -0.251670844 | 0.683 | 0.332 | 2.58E-05    | LITAF     | 4 | HIST1H4C_plasma cell |
| 2266 | 2.26E-12  | -0.251992897 | 0.996 | 0.985 | 4.93E-08    | TPT1      | 4 | HIST1H4C_plasma cell |
| 2267 | 1.14E-11  | -0.252493135 | 0.815 | 0.392 | 2.49E-07    | NSA2      | 4 | HIST1H4C_plasma cell |
| 2268 | 5.23E-08  | -0.25257348  | 0.556 | 0.278 | 0.001139913 | CAST      | 4 | HIST1H4C_plasma cell |
| 2269 | 3.71E-08  | -0.254182909 | 0.344 | 0.156 | 0.000809802 | SMC6      | 4 | HIST1H4C_plasma cell |

|      |          |              |       |       |             |          |   |                      |
|------|----------|--------------|-------|-------|-------------|----------|---|----------------------|
| 2270 | 2.80E-10 | -0.254671514 | 0.517 | 0.244 | 6.12E-06    | TNFAIP3  | 4 | HIST1H4C_plasma cell |
| 2271 | 4.43E-12 | -0.256829401 | 0.815 | 0.401 | 9.65E-08    | TCF4     | 4 | HIST1H4C_plasma cell |
| 2272 | 1.33E-06 | -0.258072548 | 0.799 | 0.439 | 0.029112429 | LAPTM4A  | 4 | HIST1H4C_plasma cell |
| 2273 | 2.15E-06 | -0.258641037 | 0.375 | 0.187 | 0.046959137 | SPI1     | 4 | HIST1H4C_plasma cell |
| 2274 | 1.57E-10 | -0.259031347 | 0.595 | 0.28  | 3.43E-06    | MEAF6    | 4 | HIST1H4C_plasma cell |
| 2275 | 5.22E-09 | -0.260375522 | 0.645 | 0.325 | 0.000113769 | PTP4A1   | 4 | HIST1H4C_plasma cell |
| 2276 | 1.59E-08 | -0.260516747 | 0.741 | 0.381 | 0.00034581  | SP140    | 4 | HIST1H4C_plasma cell |
| 2277 | 7.89E-10 | -0.262031774 | 0.68  | 0.339 | 1.72E-05    | MYCBP2   | 4 | HIST1H4C_plasma cell |
| 2278 | 3.15E-12 | -0.262161435 | 0.753 | 0.345 | 6.88E-08    | PAIP2    | 4 | HIST1H4C_plasma cell |
| 2279 | 2.95E-08 | -0.262521154 | 0.741 | 0.374 | 0.000644041 | WHSC1L1  | 4 | HIST1H4C_plasma cell |
| 2280 | 1.63E-07 | -0.265169255 | 0.822 | 0.442 | 0.003554346 | MYL12B   | 4 | HIST1H4C_plasma cell |
| 2281 | 1.94E-07 | -0.26582966  | 0.378 | 0.182 | 0.004227663 | TMEM154  | 4 | HIST1H4C_plasma cell |
| 2282 | 7.18E-07 | -0.266851475 | 0.598 | 0.314 | 0.01564812  | ABI1     | 4 | HIST1H4C_plasma cell |
| 2283 | 1.57E-06 | -0.26875768  | 0.799 | 0.436 | 0.034270711 | CCNL1    | 4 | HIST1H4C_plasma cell |
| 2284 | 1.68E-06 | -0.269014093 | 0.764 | 0.398 | 0.036649658 | ICAM3    | 4 | HIST1H4C_plasma cell |
| 2285 | 1.35E-06 | -0.269537467 | 0.792 | 0.436 | 0.029488136 | ARGLU1   | 4 | HIST1H4C_plasma cell |
| 2286 | 1.57E-14 | -0.270511223 | 0.614 | 0.258 | 3.43E-10    | CSK      | 4 | HIST1H4C_plasma cell |
| 2287 | 9.88E-08 | -0.272955895 | 0.436 | 0.21  | 0.002155372 | RGS19    | 4 | HIST1H4C_plasma cell |
| 2288 | 8.66E-11 | -0.275771173 | 0.564 | 0.256 | 1.89E-06    | ARHGEF1  | 4 | HIST1H4C_plasma cell |
| 2289 | 4.28E-12 | -0.276869492 | 0.479 | 0.202 | 9.33E-08    | PTBP3    | 4 | HIST1H4C_plasma cell |
| 2290 | 7.00E-07 | -0.277647851 | 0.521 | 0.269 | 0.015259635 | TBRG1    | 4 | HIST1H4C_plasma cell |
| 2291 | 4.76E-08 | -0.278913743 | 0.49  | 0.238 | 0.001038229 | CSNK1D   | 4 | HIST1H4C_plasma cell |
| 2292 | 1.10E-08 | -0.281590358 | 0.822 | 0.422 | 0.000240507 | PTPN1    | 4 | HIST1H4C_plasma cell |
| 2293 | 1.96E-09 | -0.283010583 | 0.483 | 0.221 | 4.28E-05    | RSF1     | 4 | HIST1H4C_plasma cell |
| 2294 | 4.24E-08 | -0.283210833 | 0.533 | 0.264 | 0.00092435  | PPP1R18  | 4 | HIST1H4C_plasma cell |
| 2295 | 6.22E-10 | -0.283487557 | 0.541 | 0.252 | 1.36E-05    | IDS      | 4 | HIST1H4C_plasma cell |
| 2296 | 1.44E-06 | -0.283829432 | 0.687 | 0.368 | 0.031477123 | ATRX     | 4 | HIST1H4C_plasma cell |
| 2297 | 2.83E-08 | -0.284286625 | 0.359 | 0.163 | 0.000617955 | VCPKMT   | 4 | HIST1H4C_plasma cell |
| 2298 | 1.05E-07 | -0.284324    | 0.792 | 0.418 | 0.002292808 | PRR13    | 4 | HIST1H4C_plasma cell |
| 2299 | 6.23E-09 | -0.284663105 | 0.409 | 0.192 | 0.000135831 | METTTL12 | 4 | HIST1H4C_plasma cell |
| 2300 | 1.14E-10 | -0.285274112 | 0.541 | 0.245 | 2.50E-06    | ZCCHC11  | 4 | HIST1H4C_plasma cell |
| 2301 | 1.08E-06 | -0.285336611 | 1     | 0.967 | 0.023630752 | RPL23A   | 4 | HIST1H4C_plasma cell |
| 2302 | 2.72E-08 | -0.285944987 | 1     | 0.971 | 0.000592098 | RPL36    | 4 | HIST1H4C_plasma cell |
| 2303 | 1.39E-07 | -0.288687279 | 1     | 0.975 | 0.003030519 | RPS6     | 4 | HIST1H4C_plasma cell |
| 2304 | 7.79E-09 | -0.291103395 | 0.749 | 0.379 | 0.000169779 | ARL6IP5  | 4 | HIST1H4C_plasma cell |
| 2305 | 3.95E-12 | -0.291233876 | 0.564 | 0.246 | 8.61E-08    | PIAS1    | 4 | HIST1H4C_plasma cell |
| 2306 | 1.01E-09 | -0.29159658  | 0.444 | 0.2   | 2.21E-05    | SCPEP1   | 4 | HIST1H4C_plasma cell |
| 2307 | 2.33E-09 | -0.292404834 | 0.992 | 0.983 | 5.08E-05    | RPL3     | 4 | HIST1H4C_plasma cell |
| 2308 | 5.68E-07 | -0.292707787 | 0.533 | 0.27  | 0.012387316 | CNPPD1   | 4 | HIST1H4C_plasma cell |
| 2309 | 2.95E-12 | -0.295369196 | 0.533 | 0.236 | 6.44E-08    | LTA4H    | 4 | HIST1H4C_plasma cell |
| 2310 | 5.94E-07 | -0.296621938 | 0.459 | 0.234 | 0.012964088 | MGEA5    | 4 | HIST1H4C_plasma cell |
| 2311 | 2.38E-09 | -0.297137146 | 0.598 | 0.292 | 5.18E-05    | ACAP2    | 4 | HIST1H4C_plasma cell |
| 2312 | 4.94E-14 | -0.297627969 | 0.653 | 0.279 | 1.08E-09    | MTPN     | 4 | HIST1H4C_plasma cell |
| 2313 | 1.07E-24 | -0.299187351 | 0.398 | 0.121 | 2.34E-20    | IGHG4    | 4 | HIST1H4C_plasma cell |
| 2314 | 1.63E-10 | -0.29922039  | 0.614 | 0.288 | 3.56E-06    | MAT2A    | 4 | HIST1H4C_plasma cell |
| 2315 | 3.05E-09 | -0.300446553 | 0.718 | 0.357 | 6.66E-05    | GGNBP2   | 4 | HIST1H4C_plasma cell |
| 2316 | 2.80E-10 | -0.300694814 | 0.544 | 0.245 | 6.11E-06    | CDC42SE1 | 4 | HIST1H4C_plasma cell |
| 2317 | 2.05E-09 | -0.302239202 | 0.417 | 0.187 | 4.48E-05    | CYFIP2   | 4 | HIST1H4C_plasma cell |
| 2318 | 2.84E-10 | -0.303958766 | 0.533 | 0.242 | 6.19E-06    | CHD1     | 4 | HIST1H4C_plasma cell |
| 2319 | 2.56E-07 | -0.304927774 | 0.664 | 0.345 | 0.005574555 | ZFAND5   | 4 | HIST1H4C_plasma cell |
| 2320 | 9.71E-13 | -0.306505575 | 1     | 0.991 | 2.12E-08    | RPS15    | 4 | HIST1H4C_plasma cell |
| 2321 | 7.74E-09 | -0.311400037 | 0.494 | 0.234 | 0.000168881 | ADD3     | 4 | HIST1H4C_plasma cell |
| 2322 | 1.07E-06 | -0.311408568 | 0.579 | 0.299 | 0.023247915 | IKZF1    | 4 | HIST1H4C_plasma cell |
| 2323 | 4.11E-12 | -0.31567032  | 0.51  | 0.246 | 8.96E-08    | IGKV1-12 | 4 | HIST1H4C_plasma cell |
| 2324 | 1.13E-14 | -0.31620328  | 0.618 | 0.262 | 2.46E-10    | ADK      | 4 | HIST1H4C_plasma cell |
| 2325 | 3.13E-08 | -0.317002354 | 0.514 | 0.249 | 0.000681619 | TRAF3IP3 | 4 | HIST1H4C_plasma cell |
| 2326 | 7.25E-11 | -0.319438721 | 0.429 | 0.181 | 1.58E-06    | RP9      | 4 | HIST1H4C_plasma cell |
| 2327 | 1.90E-06 | -0.320548361 | 0.614 | 0.319 | 0.041541285 | PELI1    | 4 | HIST1H4C_plasma cell |
| 2328 | 1.06E-08 | -0.320992603 | 0.745 | 0.379 | 0.000230292 | UCP2     | 4 | HIST1H4C_plasma cell |
| 2329 | 6.75E-10 | -0.32103298  | 0.506 | 0.228 | 1.47E-05    | PRKCB    | 4 | HIST1H4C_plasma cell |
| 2330 | 1.32E-08 | -0.323016502 | 0.664 | 0.323 | 0.000288153 | SNHG15   | 4 | HIST1H4C_plasma cell |
| 2331 | 2.52E-10 | -0.325935885 | 1     | 0.989 | 5.49E-06    | RPS18    | 4 | HIST1H4C_plasma cell |
| 2332 | 5.05E-08 | -0.327260122 | 0.413 | 0.196 | 0.001101059 | FKBP5    | 4 | HIST1H4C_plasma cell |
| 2333 | 9.03E-08 | -0.327779798 | 0.506 | 0.248 | 0.001970056 | TANK     | 4 | HIST1H4C_plasma cell |
| 2334 | 5.26E-09 | -0.328033608 | 0.68  | 0.333 | 0.000114655 | ATP2B1   | 4 | HIST1H4C_plasma cell |
| 2335 | 1.14E-17 | -0.329141153 | 1     | 0.993 | 2.48E-13    | RPS8     | 4 | HIST1H4C_plasma cell |
| 2336 | 1.67E-09 | -0.329265298 | 0.618 | 0.295 | 3.64E-05    | DNAJB6   | 4 | HIST1H4C_plasma cell |
| 2337 | 7.37E-08 | -0.329935197 | 0.483 | 0.236 | 0.001606488 | OSER1    | 4 | HIST1H4C_plasma cell |
| 2338 | 6.53E-09 | -0.330121024 | 0.463 | 0.214 | 0.000142486 | GGA2     | 4 | HIST1H4C_plasma cell |
| 2339 | 1.13E-06 | -0.331709654 | 0.517 | 0.274 | 0.024548396 | SGK1     | 4 | HIST1H4C_plasma cell |
| 2340 | 5.34E-07 | -0.332111242 | 0.51  | 0.262 | 0.011636003 | CCDC107  | 4 | HIST1H4C_plasma cell |



|      |          |              |       |       |             |             |   |                      |
|------|----------|--------------|-------|-------|-------------|-------------|---|----------------------|
| 2341 | 5.25E-08 | -0.333043061 | 0.988 | 0.969 | 0.001145947 | RPS9        | 4 | HIST1H4C_plasma cell |
| 2342 | 3.35E-07 | -0.339928934 | 0.521 | 0.26  | 0.007296469 | MAX         | 4 | HIST1H4C_plasma cell |
| 2343 | 1.64E-09 | -0.340594729 | 0.996 | 0.963 | 3.57E-05    | NACA        | 4 | HIST1H4C_plasma cell |
| 2344 | 3.98E-15 | -0.346829087 | 1     | 0.988 | 8.68E-11    | RPL19       | 4 | HIST1H4C_plasma cell |
| 2345 | 1.70E-08 | -0.34881412  | 0.992 | 0.967 | 0.000370728 | RPL17       | 4 | HIST1H4C_plasma cell |
| 2346 | 2.47E-14 | -0.348899986 | 1     | 0.979 | 5.39E-10    | RPS13       | 4 | HIST1H4C_plasma cell |
| 2347 | 5.03E-07 | -0.351017623 | 0.985 | 0.954 | 0.010977897 | RPSA        | 4 | HIST1H4C_plasma cell |
| 2348 | 8.66E-07 | -0.351967906 | 0.625 | 0.322 | 0.018880003 | SCAF11      | 4 | HIST1H4C_plasma cell |
| 2349 | 6.35E-09 | -0.352865993 | 0.556 | 0.262 | 0.000138455 | SNHG12      | 4 | HIST1H4C_plasma cell |
| 2350 | 7.60E-12 | -0.352988203 | 1     | 0.977 | 1.66E-07    | RPS5        | 4 | HIST1H4C_plasma cell |
| 2351 | 1.00E-23 | -0.354476938 | 0.622 | 0.269 | 2.19E-19    | IGHA1       | 4 | HIST1H4C_plasma cell |
| 2352 | 5.51E-07 | -0.358515613 | 0.664 | 0.34  | 0.012020246 | ANKRD10     | 4 | HIST1H4C_plasma cell |
| 2353 | 1.22E-08 | -0.360331254 | 0.66  | 0.319 | 0.000266481 | CCNH        | 4 | HIST1H4C_plasma cell |
| 2354 | 4.65E-10 | -0.361906521 | 0.653 | 0.314 | 1.01E-05    | CIB1        | 4 | HIST1H4C_plasma cell |
| 2355 | 6.34E-09 | -0.364026183 | 0.985 | 0.908 | 0.000138324 | UBC         | 4 | HIST1H4C_plasma cell |
| 2356 | 4.38E-08 | -0.365184961 | 0.456 | 0.217 | 0.000954632 | BTLA        | 4 | HIST1H4C_plasma cell |
| 2357 | 3.89E-18 | -0.376080451 | 1     | 0.993 | 8.48E-14    | RPL28       | 4 | HIST1H4C_plasma cell |
| 2358 | 6.22E-14 | -0.385317188 | 1     | 0.988 | 1.36E-09    | RPLP2       | 4 | HIST1H4C_plasma cell |
| 2359 | 2.12E-07 | -0.3863061   | 0.637 | 0.312 | 0.004627266 | ITSN2       | 4 | HIST1H4C_plasma cell |
| 2360 | 4.32E-09 | -0.39119127  | 0.992 | 0.96  | 9.42E-05    | RPL10A      | 4 | HIST1H4C_plasma cell |
| 2361 | 3.25E-15 | -0.39172987  | 1     | 0.979 | 7.09E-11    | RPL29       | 4 | HIST1H4C_plasma cell |
| 2362 | 6.13E-12 | -0.394376768 | 0.988 | 0.977 | 1.34E-07    | MT-ND1      | 4 | HIST1H4C_plasma cell |
| 2363 | 2.33E-09 | -0.397902927 | 0.764 | 0.379 | 5.07E-05    | BAX         | 4 | HIST1H4C_plasma cell |
| 2364 | 2.99E-18 | -0.407246876 | 1     | 0.997 | 6.51E-14    | AC090498.1  | 4 | HIST1H4C_plasma cell |
| 2365 | 2.16E-07 | -0.419721378 | 0.402 | 0.186 | 0.004699658 | DCK         | 4 | HIST1H4C_plasma cell |
| 2366 | 6.96E-09 | -0.431807417 | 0.988 | 0.945 | 0.000151864 | RPL9        | 4 | HIST1H4C_plasma cell |
| 2367 | 7.68E-08 | -0.44458079  | 0.992 | 0.847 | 0.001674145 | HERPUD1     | 4 | HIST1H4C_plasma cell |
| 2368 | 1.93E-22 | -0.444832476 | 1     | 0.987 | 4.20E-18    | RPS28       | 4 | HIST1H4C_plasma cell |
| 2369 | 3.57E-20 | -0.446376951 | 1     | 0.991 | 7.79E-16    | RPL18       | 4 | HIST1H4C_plasma cell |
| 2370 | 4.75E-19 | -0.455778972 | 0.996 | 0.98  | 1.04E-14    | RPS10       | 4 | HIST1H4C_plasma cell |
| 2371 | 1.83E-24 | -0.467000929 | 1     | 0.99  | 3.98E-20    | RPS15A      | 4 | HIST1H4C_plasma cell |
| 2372 | 7.40E-29 | -0.475329706 | 1     | 0.997 | 1.61E-24    | RPL10       | 4 | HIST1H4C_plasma cell |
| 2373 | 7.18E-15 | -0.477100374 | 0.996 | 0.956 | 1.57E-10    | RPS11       | 4 | HIST1H4C_plasma cell |
| 2374 | 1.78E-13 | -0.479495403 | 0.996 | 0.971 | 3.88E-09    | RPL12       | 4 | HIST1H4C_plasma cell |
| 2375 | 2.01E-16 | -0.481601467 | 1     | 0.986 | 4.38E-12    | RPS21       | 4 | HIST1H4C_plasma cell |
| 2376 | 5.32E-22 | -0.49549452  | 0.996 | 0.978 | 1.16E-17    | RPS14       | 4 | HIST1H4C_plasma cell |
| 2377 | 1.83E-19 | -0.49659299  | 1     | 0.994 | 3.99E-15    | RPL11       | 4 | HIST1H4C_plasma cell |
| 2378 | 1.17E-18 | -0.523981496 | 1     | 0.98  | 2.56E-14    | RPS3A       | 4 | HIST1H4C_plasma cell |
| 2379 | 1.46E-19 | -0.535950059 | 1     | 0.986 | 3.18E-15    | RPS12       | 4 | HIST1H4C_plasma cell |
| 2380 | 1.80E-13 | -0.548644552 | 0.992 | 0.943 | 3.93E-09    | MT-ND2      | 4 | HIST1H4C_plasma cell |
| 2381 | 2.65E-11 | -0.551846214 | 0.973 | 0.837 | 5.77E-07    | HLA-E       | 4 | HIST1H4C_plasma cell |
| 2382 | 9.13E-17 | -0.555514469 | 0.992 | 0.96  | 1.99E-12    | RPL13A      | 4 | HIST1H4C_plasma cell |
| 2383 | 2.29E-10 | -0.558698099 | 0.992 | 0.904 | 4.99E-06    | RPL38       | 4 | HIST1H4C_plasma cell |
| 2384 | 1.18E-06 | -0.559114002 | 1     | 0.971 | 0.025775539 | FTH1        | 4 | HIST1H4C_plasma cell |
| 2385 | 3.92E-24 | -0.559799998 | 0.996 | 0.974 | 8.55E-20    | RPL35A      | 4 | HIST1H4C_plasma cell |
| 2386 | 8.41E-19 | -0.568903614 | 0.992 | 0.968 | 1.83E-14    | RPL22       | 4 | HIST1H4C_plasma cell |
| 2387 | 6.58E-27 | -0.578603664 | 0.996 | 0.989 | 1.44E-22    | FAU         | 4 | HIST1H4C_plasma cell |
| 2388 | 4.88E-21 | -0.58322594  | 0.996 | 0.977 | 1.06E-16    | RPL26       | 4 | HIST1H4C_plasma cell |
| 2389 | 1.49E-20 | -0.592390847 | 0.996 | 0.97  | 3.25E-16    | MT-ND4      | 4 | HIST1H4C_plasma cell |
| 2390 | 6.30E-08 | -0.601093881 | 0.969 | 0.767 | 0.001374109 | PTPRCAP     | 4 | HIST1H4C_plasma cell |
| 2391 | 1.29E-13 | -0.603238572 | 0.973 | 0.859 | 2.82E-09    | DDX5        | 4 | HIST1H4C_plasma cell |
| 2392 | 1.53E-19 | -0.604919899 | 0.992 | 0.973 | 3.33E-15    | RPL21       | 4 | HIST1H4C_plasma cell |
| 2393 | 5.89E-27 | -0.60644398  | 0.996 | 0.997 | 1.29E-22    | EEF1A1      | 4 | HIST1H4C_plasma cell |
| 2394 | 5.91E-25 | -0.60799729  | 1     | 0.981 | 1.29E-20    | RPL37       | 4 | HIST1H4C_plasma cell |
| 2395 | 6.23E-21 | -0.608051914 | 1     | 0.986 | 1.36E-16    | RPS23       | 4 | HIST1H4C_plasma cell |
| 2396 | 6.89E-14 | -0.6177303   | 0.942 | 0.808 | 1.50E-09    | SARAF       | 4 | HIST1H4C_plasma cell |
| 2397 | 1.72E-22 | -0.626977856 | 0.992 | 0.975 | 3.76E-18    | EIF1        | 4 | HIST1H4C_plasma cell |
| 2398 | 1.96E-06 | -0.634970061 | 0.923 | 0.768 | 0.042761603 | RPS20       | 4 | HIST1H4C_plasma cell |
| 2399 | 1.95E-20 | -0.642246952 | 1     | 0.97  | 4.25E-16    | RPS25       | 4 | HIST1H4C_plasma cell |
| 2400 | 1.95E-25 | -0.644358992 | 0.996 | 0.994 | 4.25E-21    | RPL13       | 4 | HIST1H4C_plasma cell |
| 2401 | 1.12E-21 | -0.646075707 | 0.992 | 0.988 | 2.44E-17    | RPS27A      | 4 | HIST1H4C_plasma cell |
| 2402 | 4.80E-07 | -0.646753689 | 0.12  | 0.236 | 0.010469929 | SMIM14      | 4 | HIST1H4C_plasma cell |
| 2403 | 4.82E-27 | -0.659668201 | 0.996 | 0.986 | 1.05E-22    | RPL18A      | 4 | HIST1H4C_plasma cell |
| 2404 | 1.87E-06 | -0.671381162 | 0.174 | 0.275 | 0.040866532 | CD40        | 4 | HIST1H4C_plasma cell |
| 2405 | 1.12E-06 | -0.672498708 | 0.1   | 0.211 | 0.024419681 | P11-693J15. | 4 | HIST1H4C_plasma cell |
| 2406 | 6.71E-37 | -0.678110813 | 0.996 | 0.997 | 1.46E-32    | MT-ND3      | 4 | HIST1H4C_plasma cell |
| 2407 | 1.07E-18 | -0.683450831 | 0.996 | 0.944 | 2.32E-14    | RPS29       | 4 | HIST1H4C_plasma cell |
| 2408 | 1.52E-10 | -0.693413141 | 0.961 | 0.805 | 3.31E-06    | TOMM7       | 4 | HIST1H4C_plasma cell |
| 2409 | 2.69E-17 | -0.705173619 | 0.981 | 0.941 | 5.86E-13    | TMSB4X      | 4 | HIST1H4C_plasma cell |
| 2410 | 1.79E-08 | -0.712572301 | 0.931 | 0.732 | 0.000389622 | CIRBP       | 4 | HIST1H4C_plasma cell |
| 2411 | 3.79E-08 | -0.761378776 | 0.1   | 0.23  | 0.000827565 | FAM65B      | 4 | HIST1H4C_plasma cell |

|      |          |              |       |       |             |           |   |                      |
|------|----------|--------------|-------|-------|-------------|-----------|---|----------------------|
| 2412 | 6.63E-08 | -0.773215408 | 0.938 | 0.728 | 0.001446848 | EZR       | 4 | HIST1H4C_plasma cell |
| 2413 | 1.02E-25 | -0.773285253 | 1     | 0.984 | 2.23E-21    | RPL32     | 4 | HIST1H4C_plasma cell |
| 2414 | 6.07E-31 | -0.785052104 | 0.973 | 0.906 | 1.32E-26    | CD79A     | 4 | HIST1H4C_plasma cell |
| 2415 | 9.52E-22 | -0.794746589 | 0.965 | 0.884 | 2.08E-17    | IER2      | 4 | HIST1H4C_plasma cell |
| 2416 | 1.30E-23 | -0.800429349 | 1     | 0.995 | 2.84E-19    | RPS19     | 4 | HIST1H4C_plasma cell |
| 2417 | 1.06E-13 | -0.814399414 | 0.803 | 0.753 | 2.31E-09    | JUN       | 4 | HIST1H4C_plasma cell |
| 2418 | 8.73E-26 | -0.83091459  | 1     | 0.984 | 1.90E-21    | RPL30     | 4 | HIST1H4C_plasma cell |
| 2419 | 5.90E-08 | -0.848257976 | 0.116 | 0.243 | 0.001286043 | FCER2     | 4 | HIST1H4C_plasma cell |
| 2420 | 3.13E-11 | -0.875105797 | 0.73  | 0.674 | 6.83E-07    | KLF6      | 4 | HIST1H4C_plasma cell |
| 2421 | 1.45E-07 | -0.902987164 | 0.201 | 0.306 | 0.003169058 | ADAM28    | 4 | HIST1H4C_plasma cell |
| 2422 | 1.36E-06 | -0.909323886 | 0.514 | 0.494 | 0.02965577  | BIRC3     | 4 | HIST1H4C_plasma cell |
| 2423 | 1.87E-10 | -0.91111538  | 0.842 | 0.699 | 4.08E-06    | COMMD6    | 4 | HIST1H4C_plasma cell |
| 2424 | 1.99E-06 | -0.929404985 | 0.772 | 0.609 | 0.043434415 | PTPRC     | 4 | HIST1H4C_plasma cell |
| 2425 | 3.66E-11 | -0.934413102 | 0.834 | 0.688 | 7.99E-07    | GLTSCR2   | 4 | HIST1H4C_plasma cell |
| 2426 | 4.79E-09 | -0.945876811 | 0.297 | 0.395 | 0.000104523 | LY9       | 4 | HIST1H4C_plasma cell |
| 2427 | 1.71E-09 | -0.951808508 | 0.483 | 0.527 | 3.73E-05    | FOSB      | 4 | HIST1H4C_plasma cell |
| 2428 | 2.26E-39 | -0.956074233 | 0.996 | 0.988 | 4.93E-35    | RPL34     | 4 | HIST1H4C_plasma cell |
| 2429 | 4.17E-20 | -0.963132928 | 0.838 | 0.747 | 9.10E-16    | PNRC1     | 4 | HIST1H4C_plasma cell |
| 2430 | 7.84E-09 | -0.977787487 | 0.158 | 0.293 | 0.000170979 | ZNF331    | 4 | HIST1H4C_plasma cell |
| 2431 | 1.14E-78 | -0.981296874 | 1     | 1     | 2.49E-74    | MALAT1    | 4 | HIST1H4C_plasma cell |
| 2432 | 6.80E-18 | -0.991831866 | 0.162 | 0.39  | 1.48E-13    | RNASET2   | 4 | HIST1H4C_plasma cell |
| 2433 | 1.88E-33 | -0.994538831 | 0.938 | 0.911 | 4.09E-29    | ZFP36     | 4 | HIST1H4C_plasma cell |
| 2434 | 4.84E-33 | -0.995828946 | 0.996 | 0.984 | 1.06E-28    | RPL39     | 4 | HIST1H4C_plasma cell |
| 2435 | 1.63E-12 | -1.002186294 | 0.676 | 0.643 | 3.56E-08    | DDIT4     | 4 | HIST1H4C_plasma cell |
| 2436 | 2.55E-36 | -1.013663471 | 0.973 | 0.915 | 5.56E-32    | PFDN5     | 4 | HIST1H4C_plasma cell |
| 2437 | 1.13E-10 | -1.016843152 | 0.266 | 0.4   | 2.47E-06    | NR4A1     | 4 | HIST1H4C_plasma cell |
| 2438 | 6.06E-09 | -1.056355255 | 0.741 | 0.647 | 0.000132119 | GADD45B   | 4 | HIST1H4C_plasma cell |
| 2439 | 2.04E-13 | -1.070370249 | 0.772 | 0.674 | 4.45E-09    | ZFAS1     | 4 | HIST1H4C_plasma cell |
| 2440 | 3.35E-08 | -1.080384967 | 0.205 | 0.321 | 0.00072948  | ID3       | 4 | HIST1H4C_plasma cell |
| 2441 | 4.07E-20 | -1.113765619 | 0.259 | 0.478 | 8.88E-16    | IFITM2    | 4 | HIST1H4C_plasma cell |
| 2442 | 1.84E-12 | -1.117397155 | 0.266 | 0.403 | 4.01E-08    | BANK1     | 4 | HIST1H4C_plasma cell |
| 2443 | 2.79E-11 | -1.147070152 | 0.228 | 0.371 | 6.09E-07    | GPR183    | 4 | HIST1H4C_plasma cell |
| 2444 | 6.69E-09 | -1.179617807 | 0.405 | 0.443 | 0.000145801 | FCMR      | 4 | HIST1H4C_plasma cell |
| 2445 | 2.42E-24 | -1.207518955 | 0.757 | 0.771 | 5.29E-20    | FOS       | 4 | HIST1H4C_plasma cell |
| 2446 | 2.93E-18 | -1.210541685 | 0.197 | 0.416 | 6.39E-14    | IRF8      | 4 | HIST1H4C_plasma cell |
| 2447 | 7.08E-14 | -1.234273905 | 0.873 | 0.714 | 1.54E-09    | HLA-DRB5  | 4 | HIST1H4C_plasma cell |
| 2448 | 2.21E-36 | -1.258973937 | 0.873 | 0.873 | 4.82E-32    | ZFP36L2   | 4 | HIST1H4C_plasma cell |
| 2449 | 6.60E-20 | -1.279733638 | 0.158 | 0.403 | 1.44E-15    | REL       | 4 | HIST1H4C_plasma cell |
| 2450 | 2.84E-16 | -1.30258963  | 0.691 | 0.645 | 6.19E-12    | CD55      | 4 | HIST1H4C_plasma cell |
| 2451 | 3.67E-24 | -1.341300032 | 0.919 | 0.805 | 8.00E-20    | HLA-DPA1  | 4 | HIST1H4C_plasma cell |
| 2452 | 1.50E-16 | -1.354535406 | 0.876 | 0.726 | 3.28E-12    | CD52      | 4 | HIST1H4C_plasma cell |
| 2453 | 1.13E-34 | -1.360818408 | 0.996 | 0.982 | 2.47E-30    | RPS27     | 4 | HIST1H4C_plasma cell |
| 2454 | 3.04E-34 | -1.440187335 | 0.83  | 0.831 | 6.63E-30    | LAPTM5    | 4 | HIST1H4C_plasma cell |
| 2455 | 1.22E-24 | -1.49114101  | 0.313 | 0.537 | 2.66E-20    | SLC2A3    | 4 | HIST1H4C_plasma cell |
| 2456 | 2.10E-36 | -1.567778615 | 0.888 | 0.831 | 4.58E-32    | HLA-DQB1  | 4 | HIST1H4C_plasma cell |
| 2457 | 9.89E-25 | -1.571774026 | 0.452 | 0.611 | 2.16E-20    | NR4A2     | 4 | HIST1H4C_plasma cell |
| 2458 | 1.78E-31 | -1.584314656 | 0.386 | 0.619 | 3.88E-27    | ZFP36L1   | 4 | HIST1H4C_plasma cell |
| 2459 | 3.21E-21 | -1.616336543 | 0.737 | 0.682 | 7.00E-17    | HLA-DQA1  | 4 | HIST1H4C_plasma cell |
| 2460 | 1.54E-56 | -1.621439606 | 0.958 | 0.945 | 3.35E-52    | JUNB      | 4 | HIST1H4C_plasma cell |
| 2461 | 1.34E-61 | -1.62823512  | 0.718 | 0.885 | 2.92E-57    | TSC22D3   | 4 | HIST1H4C_plasma cell |
| 2462 | 7.15E-34 | -1.8056698   | 0.903 | 0.844 | 1.56E-29    | HLA-DRB1  | 4 | HIST1H4C_plasma cell |
| 2463 | 2.10E-06 | -1.815158725 | 0.266 | 0.139 | 0.045804598 | IGLV6-57  | 4 | HIST1H4C_plasma cell |
| 2464 | 1.51E-31 | -1.833875055 | 0.699 | 0.732 | 3.29E-27    | HLA-DPB1  | 4 | HIST1H4C_plasma cell |
| 2465 | 5.68E-65 | -1.863571704 | 0.996 | 0.993 | 1.24E-60    | CD74      | 4 | HIST1H4C_plasma cell |
| 2466 | 4.84E-53 | -1.886320855 | 0.653 | 0.82  | 1.06E-48    | DUSP1     | 4 | HIST1H4C_plasma cell |
| 2467 | 7.35E-50 | -1.983124615 | 0.772 | 0.84  | 1.60E-45    | CXCR4     | 4 | HIST1H4C_plasma cell |
| 2468 | 1.08E-36 | -2.180284333 | 0.753 | 0.781 | 2.35E-32    | CD37      | 4 | HIST1H4C_plasma cell |
| 2469 | 2.19E-06 | -2.20183458  | 0.286 | 0.145 | 0.047714359 | IGLV3-1   | 4 | HIST1H4C_plasma cell |
| 2470 | 4.68E-44 | -2.228789989 | 0.355 | 0.666 | 1.02E-39    | TXNIP     | 4 | HIST1H4C_plasma cell |
| 2471 | 1.19E-41 | -2.309046918 | 0.1   | 0.534 | 2.58E-37    | CD83      | 4 | HIST1H4C_plasma cell |
| 2472 | 8.15E-58 | -2.451089939 | 0.884 | 0.905 | 1.78E-53    | BTG1      | 4 | HIST1H4C_plasma cell |
| 2473 | 4.38E-47 | -2.481343046 | 0.116 | 0.58  | 9.56E-43    | CD69      | 4 | HIST1H4C_plasma cell |
| 2474 | 4.59E-34 | -2.683929388 | 0.826 | 0.775 | 1.00E-29    | HLA-DRA   | 4 | HIST1H4C_plasma cell |
| 2475 | 6.29E-21 | 4.738029825  | 0.539 | 0.149 | 1.37E-16    | IGLV3-1   | 5 | IGLV3-1_plasma cell  |
| 2476 | 4.43E-10 | 3.413961729  | 0.224 | 0.053 | 9.65E-06    | IGKV1D-39 | 5 | IGLV3-1_plasma cell  |
| 2477 | 2.30E-11 | 3.222210486  | 0.211 | 0.043 | 5.02E-07    | IGKV1D-12 | 5 | IGLV3-1_plasma cell  |
| 2478 | 1.77E-06 | 3.193111637  | 0.158 | 0.041 | 0.038531594 | IGLV3-21  | 5 | IGLV3-1_plasma cell  |
| 2479 | 3.98E-08 | 3.133366579  | 0.145 | 0.03  | 0.000866986 | IGKV1D-8  | 5 | IGLV3-1_plasma cell  |
| 2480 | 1.82E-15 | 2.774235159  | 0.487 | 0.142 | 3.97E-11    | IGLV6-57  | 5 | IGLV3-1_plasma cell  |
| 2481 | 3.72E-15 | 2.326135586  | 0.711 | 0.353 | 8.11E-11    | IGHG1     | 5 | IGLV3-1_plasma cell  |
| 2482 | 8.55E-08 | 2.06248366   | 0.237 | 0.07  | 0.001863984 | IGHV3-33  | 5 | IGLV3-1_plasma cell  |

|      |           |             |       |       |             |            |   |                     |
|------|-----------|-------------|-------|-------|-------------|------------|---|---------------------|
| 2483 | 2.83E-08  | 1.907296838 | 0.224 | 0.058 | 0.000618012 | IGHV1-46   | 5 | IGLV3-1_plasma cell |
| 2484 | 2.76E-07  | 1.886359494 | 0.171 | 0.043 | 0.006024647 | IGKV1-17   | 5 | IGLV3-1_plasma cell |
| 2485 | 2.33E-15  | 1.708231318 | 0.447 | 0.148 | 5.09E-11    | IGHG4      | 5 | IGLV3-1_plasma cell |
| 2486 | 4.62E-08  | 1.597380787 | 0.289 | 0.095 | 0.001008145 | IGKV1-27   | 5 | IGLV3-1_plasma cell |
| 2487 | 1.10E-07  | 1.572963549 | 0.263 | 0.078 | 0.002395476 | IGLV1-40   | 5 | IGLV3-1_plasma cell |
| 2488 | 1.55E-22  | 1.392333259 | 0.724 | 0.231 | 3.37E-18    | HSPB1      | 5 | IGLV3-1_plasma cell |
| 2489 | 4.58E-07  | 1.296747322 | 0.711 | 0.569 | 0.009998034 | IGKC       | 5 | IGLV3-1_plasma cell |
| 2490 | 2.58E-39  | 1.295242336 | 1     | 0.644 | 5.63E-35    | SSR4       | 5 | IGLV3-1_plasma cell |
| 2491 | 6.29E-13  | 1.259456975 | 0.276 | 0.061 | 1.37E-08    | IGKV1-6    | 5 | IGLV3-1_plasma cell |
| 2492 | 1.14E-45  | 1.157295332 | 0.579 | 0.085 | 2.49E-41    | JSRP1      | 5 | IGLV3-1_plasma cell |
| 2493 | 1.78E-81  | 1.021514079 | 0.632 | 0.049 | 3.87E-77    | TIMP1      | 5 | IGLV3-1_plasma cell |
| 2494 | 9.69E-10  | 1.007886899 | 0.184 | 0.037 | 2.11E-05    | IGKV1D-33  | 5 | IGLV3-1_plasma cell |
| 2495 | 5.68E-15  | 0.981177615 | 0.645 | 0.244 | 1.24E-10    | RGCC       | 5 | IGLV3-1_plasma cell |
| 2496 | 3.60E-10  | 0.953212506 | 0.632 | 0.309 | 7.85E-06    | HSPA1B     | 5 | IGLV3-1_plasma cell |
| 2497 | 3.37E-55  | 0.870930527 | 0.868 | 0.178 | 7.34E-51    | SPAG4      | 5 | IGLV3-1_plasma cell |
| 2498 | 8.22E-13  | 0.863252782 | 0.671 | 0.295 | 1.79E-08    | HSPA1A     | 5 | IGLV3-1_plasma cell |
| 2499 | 6.71E-17  | 0.841520606 | 0.303 | 0.059 | 1.46E-12    | BAG3       | 5 | IGLV3-1_plasma cell |
| 2500 | 7.89E-24  | 0.837400834 | 0.921 | 0.431 | 1.72E-19    | PRDX4      | 5 | IGLV3-1_plasma cell |
| 2501 | 7.88E-18  | 0.832219244 | 0.908 | 0.444 | 1.72E-13    | DERL3      | 5 | IGLV3-1_plasma cell |
| 2502 | 1.78E-58  | 0.820130307 | 0.803 | 0.135 | 3.88E-54    | SELM       | 5 | IGLV3-1_plasma cell |
| 2503 | 3.47E-12  | 0.78413587  | 0.711 | 0.346 | 7.56E-08    | LINC00152  | 5 | IGLV3-1_plasma cell |
| 2504 | 9.08E-45  | 0.77531641  | 0.684 | 0.115 | 1.98E-40    | LMNA       | 5 | IGLV3-1_plasma cell |
| 2505 | 7.16E-10  | 0.730502095 | 0.395 | 0.132 | 1.56E-05    | IGHG3      | 5 | IGLV3-1_plasma cell |
| 2506 | 5.79E-44  | 0.724263313 | 0.829 | 0.194 | 1.26E-39    | SDC1       | 5 | IGLV3-1_plasma cell |
| 2507 | 2.76E-22  | 0.700841178 | 0.434 | 0.093 | 6.01E-18    | DUSP5      | 5 | IGLV3-1_plasma cell |
| 2508 | 1.28E-62  | 0.698361146 | 0.539 | 0.047 | 2.80E-58    | CST3       | 5 | IGLV3-1_plasma cell |
| 2509 | 1.42E-08  | 0.688219306 | 0.132 | 0.023 | 0.000309526 | IGHJ6      | 5 | IGLV3-1_plasma cell |
| 2510 | 4.13E-21  | 0.673875448 | 0.289 | 0.043 | 9.01E-17    | DNAAF1     | 5 | IGLV3-1_plasma cell |
| 2511 | 1.04E-18  | 0.644122891 | 0.947 | 0.452 | 2.28E-14    | FKBP2      | 5 | IGLV3-1_plasma cell |
| 2512 | 8.61E-21  | 0.603535417 | 0.961 | 0.532 | 1.88E-16    | NPC2       | 5 | IGLV3-1_plasma cell |
| 2513 | 7.73E-26  | 0.603154228 | 0.868 | 0.341 | 1.69E-21    | CD63       | 5 | IGLV3-1_plasma cell |
| 2514 | 4.76E-15  | 0.591758332 | 0.5   | 0.155 | 1.04E-10    | ZFAND2A    | 5 | IGLV3-1_plasma cell |
| 2515 | 1.72E-16  | 0.59169057  | 0.961 | 0.558 | 3.74E-12    | TMEM59     | 5 | IGLV3-1_plasma cell |
| 2516 | 1.19E-11  | 0.58873412  | 0.224 | 0.044 | 2.59E-07    | MT1F       | 5 | IGLV3-1_plasma cell |
| 2517 | 1.43E-95  | 0.579072709 | 0.658 | 0.042 | 3.11E-91    | CD9        | 5 | IGLV3-1_plasma cell |
| 2518 | 1.18E-33  | 0.575011431 | 0.711 | 0.167 | 2.58E-29    | LY96       | 5 | IGLV3-1_plasma cell |
| 2519 | 3.47E-13  | 0.563313999 | 0.947 | 0.442 | 7.57E-09    | FKBP11     | 5 | IGLV3-1_plasma cell |
| 2520 | 2.72E-26  | 0.538959911 | 0.763 | 0.25  | 5.92E-22    | CREB3L2    | 5 | IGLV3-1_plasma cell |
| 2521 | 6.05E-09  | 0.538279263 | 0.408 | 0.157 | 0.000131962 | MIR155HG   | 5 | IGLV3-1_plasma cell |
| 2522 | 4.59E-15  | 0.53086153  | 0.868 | 0.442 | 1.00E-10    | DNAJB9     | 5 | IGLV3-1_plasma cell |
| 2523 | 3.04E-46  | 0.529344927 | 0.474 | 0.053 | 6.64E-42    | DPEP1      | 5 | IGLV3-1_plasma cell |
| 2524 | 7.95E-19  | 0.526119071 | 0.697 | 0.272 | 1.73E-14    | GAS6       | 5 | IGLV3-1_plasma cell |
| 2525 | 5.95E-10  | 0.525957047 | 0.908 | 0.471 | 1.30E-05    | GSTP1      | 5 | IGLV3-1_plasma cell |
| 2526 | 2.98E-23  | 0.515345946 | 0.145 | 0.008 | 6.51E-19    | IGKV1D-17  | 5 | IGLV3-1_plasma cell |
| 2527 | 8.36E-11  | 0.514915271 | 0.671 | 0.348 | 1.82E-06    | PEL1       | 5 | IGLV3-1_plasma cell |
| 2528 | 4.11E-17  | 0.50979618  | 0.711 | 0.286 | 8.96E-13    | TRIB1      | 5 | IGLV3-1_plasma cell |
| 2529 | 7.33E-08  | 0.508745224 | 0.895 | 0.673 | 0.001598028 | KLF6       | 5 | IGLV3-1_plasma cell |
| 2530 | 5.52E-09  | 0.499499549 | 0.987 | 0.863 | 0.000120484 | HERPUD1    | 5 | IGLV3-1_plasma cell |
| 2531 | 1.65E-18  | 0.493297765 | 0.368 | 0.077 | 3.60E-14    | RASD1      | 5 | IGLV3-1_plasma cell |
| 2532 | 7.08E-10  | 0.486271867 | 0.118 | 0.016 | 1.54E-05    | GPLY       | 5 | IGLV3-1_plasma cell |
| 2533 | 2.45E-16  | 0.476297686 | 0.829 | 0.356 | 5.34E-12    | NUCB2      | 5 | IGLV3-1_plasma cell |
| 2534 | 1.46E-07  | 0.475180291 | 0.592 | 0.326 | 0.003194255 | ANKRD28    | 5 | IGLV3-1_plasma cell |
| 2535 | 6.21E-16  | 0.474461205 | 0.816 | 0.366 | 1.35E-11    | DNAJC1     | 5 | IGLV3-1_plasma cell |
| 2536 | 2.41E-114 | 0.474170997 | 0.408 | 0.006 | 5.26E-110   | CTHRC1     | 5 | IGLV3-1_plasma cell |
| 2537 | 1.34E-12  | 0.464900281 | 0.908 | 0.425 | 2.91E-08    | HDLBP      | 5 | IGLV3-1_plasma cell |
| 2538 | 6.37E-47  | 0.464368239 | 0.711 | 0.115 | 1.39E-42    | A1BG       | 5 | IGLV3-1_plasma cell |
| 2539 | 8.65E-31  | 0.420883494 | 0.158 | 0.006 | 1.89E-26    | RIP1-598F7 | 5 | IGLV3-1_plasma cell |
| 2540 | 1.66E-09  | 0.420695079 | 0.947 | 0.572 | 3.63E-05    | KRTCAP2    | 5 | IGLV3-1_plasma cell |
| 2541 | 3.20E-22  | 0.41844643  | 0.553 | 0.142 | 6.97E-18    | P4HA1      | 5 | IGLV3-1_plasma cell |
| 2542 | 8.03E-16  | 0.417086008 | 0.711 | 0.289 | 1.75E-11    | CHPF       | 5 | IGLV3-1_plasma cell |
| 2543 | 3.88E-20  | 0.414749617 | 0.684 | 0.22  | 8.46E-16    | S100A11    | 5 | IGLV3-1_plasma cell |
| 2544 | 9.67E-20  | 0.413287136 | 0.684 | 0.245 | 2.11E-15    | MEI1       | 5 | IGLV3-1_plasma cell |
| 2545 | 4.36E-07  | 0.411162091 | 0.645 | 0.341 | 0.009500072 | S100A10    | 5 | IGLV3-1_plasma cell |
| 2546 | 9.33E-13  | 0.387326494 | 0.447 | 0.147 | 2.03E-08    | KLHL6      | 5 | IGLV3-1_plasma cell |
| 2547 | 1.93E-09  | 0.373180475 | 0.868 | 0.434 | 4.20E-05    | ELL2       | 5 | IGLV3-1_plasma cell |
| 2548 | 3.84E-43  | 0.372023275 | 0.382 | 0.035 | 8.38E-39    | FAM92B     | 5 | IGLV3-1_plasma cell |
| 2549 | 1.46E-13  | 0.371908405 | 0.671 | 0.275 | 3.19E-09    | H1FX       | 5 | IGLV3-1_plasma cell |
| 2550 | 2.39E-17  | 0.368840345 | 0.684 | 0.249 | 5.20E-13    | PECAM1     | 5 | IGLV3-1_plasma cell |
| 2551 | 2.31E-13  | 0.365686195 | 0.711 | 0.313 | 5.04E-09    | ZBTB38     | 5 | IGLV3-1_plasma cell |
| 2552 | 3.17E-13  | 0.362634469 | 0.803 | 0.395 | 6.90E-09    | CFLAR      | 5 | IGLV3-1_plasma cell |
| 2553 | 2.60E-54  | 0.362111354 | 0.263 | 0.009 | 5.67E-50    | CTSW       | 5 | IGLV3-1_plasma cell |

|      |           |              |       |       |             |           |   |                     |
|------|-----------|--------------|-------|-------|-------------|-----------|---|---------------------|
| 2554 | 7.35E-21  | 0.360027258  | 0.342 | 0.063 | 1.60E-16    | QPCT      | 5 | IGLV3-1_plasma cell |
| 2555 | 4.70E-15  | 0.344321756  | 0.697 | 0.266 | 1.03E-10    | ANKRD37   | 5 | IGLV3-1_plasma cell |
| 2556 | 2.29E-18  | 0.342737156  | 0.75  | 0.277 | 4.99E-14    | SIL1      | 5 | IGLV3-1_plasma cell |
| 2557 | 5.52E-17  | 0.342403146  | 0.632 | 0.227 | 1.20E-12    | EIF2AK4   | 5 | IGLV3-1_plasma cell |
| 2558 | 5.19E-07  | 0.334154767  | 0.921 | 0.55  | 0.011322174 | SELK      | 5 | IGLV3-1_plasma cell |
| 2559 | 4.79E-14  | 0.327084365  | 0.75  | 0.32  | 1.04E-09    | DSTN      | 5 | IGLV3-1_plasma cell |
| 2560 | 4.73E-09  | 0.326879139  | 0.658 | 0.32  | 0.000103118 | SLAMF7    | 5 | IGLV3-1_plasma cell |
| 2561 | 1.94E-07  | 0.322252105  | 0.868 | 0.445 | 0.004231658 | ERLEC1    | 5 | IGLV3-1_plasma cell |
| 2562 | 1.26E-06  | 0.314738276  | 0.816 | 0.459 | 0.027385463 | LGALS1    | 5 | IGLV3-1_plasma cell |
| 2563 | 9.88E-101 | 0.314622426  | 0.329 | 0.003 | 2.15E-96    | TNFRSF4   | 5 | IGLV3-1_plasma cell |
| 2564 | 1.63E-14  | 0.312940881  | 0.5   | 0.159 | 3.56E-10    | PYCR1     | 5 | IGLV3-1_plasma cell |
| 2565 | 9.28E-49  | 0.3129351    | 0.276 | 0.013 | 2.02E-44    | ASS1      | 5 | IGLV3-1_plasma cell |
| 2566 | 2.43E-27  | 0.31278619   | 0.224 | 0.019 | 5.29E-23    | LGALS1    | 5 | IGLV3-1_plasma cell |
| 2567 | 1.03E-10  | 0.311039209  | 0.829 | 0.387 | 2.25E-06    | CRELD2    | 5 | IGLV3-1_plasma cell |
| 2568 | 2.18E-08  | 0.307496709  | 0.987 | 0.497 | 0.000474586 | SEC11C    | 5 | IGLV3-1_plasma cell |
| 2569 | 7.48E-22  | 0.306194336  | 0.526 | 0.133 | 1.63E-17    | LGALS3    | 5 | IGLV3-1_plasma cell |
| 2570 | 3.21E-61  | 0.291562804  | 0.355 | 0.017 | 7.01E-57    | TNFRSF18  | 5 | IGLV3-1_plasma cell |
| 2571 | 3.99E-15  | 0.287959457  | 0.421 | 0.117 | 8.71E-11    | ITGA6     | 5 | IGLV3-1_plasma cell |
| 2572 | 1.88E-18  | 0.283504173  | 0.421 | 0.092 | 4.10E-14    | ATF3      | 5 | IGLV3-1_plasma cell |
| 2573 | 4.55E-11  | 0.283089589  | 0.526 | 0.209 | 9.91E-07    | COMTD1    | 5 | IGLV3-1_plasma cell |
| 2574 | 4.70E-08  | 0.282579186  | 0.658 | 0.345 | 0.001024302 | PRDM1     | 5 | IGLV3-1_plasma cell |
| 2575 | 1.47E-21  | 0.281814637  | 0.145 | 0.009 | 3.21E-17    | KCNMA1    | 5 | IGLV3-1_plasma cell |
| 2576 | 1.13E-07  | 0.281695637  | 0.921 | 0.56  | 0.002465628 | PSAP      | 5 | IGLV3-1_plasma cell |
| 2577 | 3.20E-35  | 0.276997884  | 0.526 | 0.081 | 6.97E-31    | FCGRT     | 5 | IGLV3-1_plasma cell |
| 2578 | 2.46E-12  | 0.276543903  | 0.803 | 0.385 | 5.36E-08    | FCRL5     | 5 | IGLV3-1_plasma cell |
| 2579 | 1.62E-09  | 0.274068489  | 0.566 | 0.251 | 3.53E-05    | HMCES     | 5 | IGLV3-1_plasma cell |
| 2580 | 2.03E-16  | 0.27366357   | 0.303 | 0.059 | 4.43E-12    | IQCG      | 5 | IGLV3-1_plasma cell |
| 2581 | 3.68E-14  | 0.271603636  | 0.605 | 0.236 | 8.02E-10    | ARSA      | 5 | IGLV3-1_plasma cell |
| 2582 | 2.20E-88  | 0.269789348  | 0.408 | 0.013 | 4.80E-84    | KDEL3     | 5 | IGLV3-1_plasma cell |
| 2583 | 5.99E-118 | 0.265380461  | 0.355 | 0.002 | 1.31E-113   | SLC22A17  | 5 | IGLV3-1_plasma cell |
| 2584 | 2.75E-15  | 0.26151652   | 0.605 | 0.215 | 5.99E-11    | MAGED1    | 5 | IGLV3-1_plasma cell |
| 2585 | 3.05E-08  | 0.259162811  | 0.329 | 0.113 | 0.000664719 | PTP4A3    | 5 | IGLV3-1_plasma cell |
| 2586 | 6.39E-10  | 0.255929313  | 0.75  | 0.362 | 1.39E-05    | TXNDC15   | 5 | IGLV3-1_plasma cell |
| 2587 | 4.41E-18  | 0.252131137  | 0.789 | 0.28  | 9.62E-14    | JUND      | 5 | IGLV3-1_plasma cell |
| 2588 | 3.92E-08  | -0.451715847 | 0.947 | 0.899 | 0.000855827 | OAZ1      | 5 | IGLV3-1_plasma cell |
| 2589 | 1.17E-10  | -0.513975807 | 1     | 0.968 | 2.56E-06    | MT-ND5    | 5 | IGLV3-1_plasma cell |
| 2590 | 5.57E-11  | -0.543875584 | 0.934 | 0.863 | 1.21E-06    | ATP5E     | 5 | IGLV3-1_plasma cell |
| 2591 | 3.50E-09  | -0.549332233 | 0.829 | 0.952 | 7.63E-05    | TMSB4X    | 5 | IGLV3-1_plasma cell |
| 2592 | 1.80E-06  | -0.555445889 | 0.829 | 0.713 | 0.039232852 | EIF3K     | 5 | IGLV3-1_plasma cell |
| 2593 | 1.14E-08  | -0.583668999 | 0.921 | 0.808 | 0.000248349 | ATP5G2    | 5 | IGLV3-1_plasma cell |
| 2594 | 1.53E-12  | -0.585992758 | 0.987 | 0.945 | 3.35E-08    | EEF2      | 5 | IGLV3-1_plasma cell |
| 2595 | 2.15E-06  | -0.629632213 | 0.724 | 0.702 | 0.04693573  | RAC2      | 5 | IGLV3-1_plasma cell |
| 2596 | 4.01E-19  | -0.635958607 | 1     | 0.986 | 8.75E-15    | TPT1      | 5 | IGLV3-1_plasma cell |
| 2597 | 4.35E-10  | -0.637810146 | 0.974 | 0.949 | 9.50E-06    | MT-ND2    | 5 | IGLV3-1_plasma cell |
| 2598 | 2.04E-06  | -0.639015024 | 0.895 | 0.895 | 0.044527417 | IER2      | 5 | IGLV3-1_plasma cell |
| 2599 | 1.02E-17  | -0.642804914 | 0.987 | 0.982 | 2.22E-13    | HLA-B     | 5 | IGLV3-1_plasma cell |
| 2600 | 5.90E-11  | -0.645449338 | 0.921 | 0.837 | 1.29E-06    | COX7C     | 5 | IGLV3-1_plasma cell |
| 2601 | 1.36E-07  | -0.646275203 | 0.855 | 0.742 | 0.002967788 | UQCRB     | 5 | IGLV3-1_plasma cell |
| 2602 | 3.16E-09  | -0.676520136 | 0.882 | 0.822 | 6.90E-05    | PCBP2     | 5 | IGLV3-1_plasma cell |
| 2603 | 2.15E-20  | -0.683572843 | 0.987 | 0.991 | 4.68E-16    | RPLP0     | 5 | IGLV3-1_plasma cell |
| 2604 | 4.85E-07  | -0.70857391  | 0.829 | 0.842 | 0.010566934 | ACTG1     | 5 | IGLV3-1_plasma cell |
| 2605 | 5.76E-09  | -0.708799504 | 0.855 | 0.792 | 0.000125508 | HNRNPDL   | 5 | IGLV3-1_plasma cell |
| 2606 | 6.22E-16  | -0.7235371   | 0.961 | 0.951 | 1.36E-11    | RPL41     | 5 | IGLV3-1_plasma cell |
| 2607 | 7.36E-07  | -0.724777269 | 0.645 | 0.702 | 0.016043902 | MYL12A    | 5 | IGLV3-1_plasma cell |
| 2608 | 1.69E-08  | -0.725820784 | 0.684 | 0.707 | 0.000367928 | EIF3F     | 5 | IGLV3-1_plasma cell |
| 2609 | 4.02E-24  | -0.742243915 | 1     | 0.999 | 8.76E-20    | MT-ND4L   | 5 | IGLV3-1_plasma cell |
| 2610 | 1.03E-11  | -0.742607316 | 0.895 | 0.844 | 2.25E-07    | HINT1     | 5 | IGLV3-1_plasma cell |
| 2611 | 1.58E-08  | -0.754157139 | 0.763 | 0.728 | 0.000343667 | HNRNPK    | 5 | IGLV3-1_plasma cell |
| 2612 | 3.64E-15  | -0.75590661  | 0.987 | 0.973 | 7.94E-11    | MT-ND4    | 5 | IGLV3-1_plasma cell |
| 2613 | 4.74E-11  | -0.759142045 | 0.947 | 0.83  | 1.03E-06    | CFL1      | 5 | IGLV3-1_plasma cell |
| 2614 | 1.35E-09  | -0.760861558 | 0.789 | 0.786 | 2.94E-05    | CCNI      | 5 | IGLV3-1_plasma cell |
| 2615 | 7.04E-08  | -0.762903593 | 0.75  | 0.742 | 0.001534303 | SH3BGR3   | 5 | IGLV3-1_plasma cell |
| 2616 | 4.54E-12  | -0.764547615 | 0.934 | 0.86  | 9.90E-08    | HNRNPA2B1 | 5 | IGLV3-1_plasma cell |
| 2617 | 9.68E-11  | -0.770028413 | 0.908 | 0.874 | 2.11E-06    | DDX5      | 5 | IGLV3-1_plasma cell |
| 2618 | 9.80E-08  | -0.787414873 | 0.211 | 0.49  | 0.002136385 | LCP1      | 5 | IGLV3-1_plasma cell |
| 2619 | 1.54E-24  | -0.789297949 | 1     | 0.999 | 3.37E-20    | MT-CYB    | 5 | IGLV3-1_plasma cell |
| 2620 | 7.60E-17  | -0.793285845 | 0.961 | 0.946 | 1.66E-12    | EEF1D     | 5 | IGLV3-1_plasma cell |
| 2621 | 3.49E-17  | -0.793722358 | 0.987 | 0.997 | 7.61E-13    | MT-ND3    | 5 | IGLV3-1_plasma cell |
| 2622 | 2.18E-06  | -0.80527118  | 0.487 | 0.618 | 0.04759566  | CD79B     | 5 | IGLV3-1_plasma cell |
| 2623 | 2.96E-26  | -0.812549417 | 0.987 | 0.998 | 6.46E-22    | RPLP1     | 5 | IGLV3-1_plasma cell |
| 2624 | 1.55E-08  | -0.816676504 | 0.724 | 0.701 | 0.00033788  | NCL       | 5 | IGLV3-1_plasma cell |

|      |          |              |       |       |             |            |   |                     |
|------|----------|--------------|-------|-------|-------------|------------|---|---------------------|
| 2625 | 8.37E-20 | -0.818946346 | 0.961 | 0.966 | 1.82E-15    | EEF1B2     | 5 | IGLV3-1_plasma cell |
| 2626 | 5.73E-14 | -0.819784996 | 0.895 | 0.876 | 1.25E-09    | PFN1       | 5 | IGLV3-1_plasma cell |
| 2627 | 2.86E-11 | -0.82781767  | 0.789 | 0.772 | 6.23E-07    | RPS17      | 5 | IGLV3-1_plasma cell |
| 2628 | 1.11E-06 | -0.828463607 | 0.711 | 0.694 | 0.024100873 | CALM2      | 5 | IGLV3-1_plasma cell |
| 2629 | 1.07E-14 | -0.82944068  | 0.842 | 0.849 | 2.33E-10    | BTF3       | 5 | IGLV3-1_plasma cell |
| 2630 | 2.56E-21 | -0.83263327  | 0.987 | 0.998 | 5.59E-17    | RPL10      | 5 | IGLV3-1_plasma cell |
| 2631 | 2.87E-26 | -0.849000514 | 0.987 | 0.991 | 6.27E-22    | RPL7A      | 5 | IGLV3-1_plasma cell |
| 2632 | 4.70E-10 | -0.85752002  | 0.526 | 0.69  | 1.03E-05    | SMCHD1     | 5 | IGLV3-1_plasma cell |
| 2633 | 3.25E-09 | -0.857622208 | 0.5   | 0.633 | 7.09E-05    | LSP1       | 5 | IGLV3-1_plasma cell |
| 2634 | 1.59E-21 | -0.857670144 | 1     | 0.963 | 3.46E-17    | RPL24      | 5 | IGLV3-1_plasma cell |
| 2635 | 3.55E-14 | -0.858454559 | 0.895 | 0.849 | 7.73E-10    | NPM1       | 5 | IGLV3-1_plasma cell |
| 2636 | 1.63E-20 | -0.858832696 | 0.987 | 0.978 | 3.55E-16    | MT-ND1     | 5 | IGLV3-1_plasma cell |
| 2637 | 9.13E-07 | -0.860625214 | 0.579 | 0.68  | 0.019921326 | TAGLN2     | 5 | IGLV3-1_plasma cell |
| 2638 | 2.20E-06 | -0.875697851 | 0.592 | 0.669 | 0.04789548  | FUS        | 5 | IGLV3-1_plasma cell |
| 2639 | 1.33E-10 | -0.876766498 | 0.697 | 0.759 | 2.90E-06    | EIF3E      | 5 | IGLV3-1_plasma cell |
| 2640 | 1.00E-07 | -0.880181158 | 0.224 | 0.489 | 0.002187812 | LYN        | 5 | IGLV3-1_plasma cell |
| 2641 | 1.38E-29 | -0.890207352 | 1     | 1     | 3.00E-25    | MT-CO2     | 5 | IGLV3-1_plasma cell |
| 2642 | 2.68E-15 | -0.896778731 | 0.908 | 0.853 | 5.85E-11    | RPL27A     | 5 | IGLV3-1_plasma cell |
| 2643 | 7.10E-20 | -0.899088229 | 0.908 | 0.893 | 1.55E-15    | COX4I1     | 5 | IGLV3-1_plasma cell |
| 2644 | 9.89E-23 | -0.900847536 | 1     | 0.99  | 2.16E-18    | FAU        | 5 | IGLV3-1_plasma cell |
| 2645 | 7.09E-22 | -0.906556686 | 0.961 | 0.968 | 1.55E-17    | NACA       | 5 | IGLV3-1_plasma cell |
| 2646 | 3.48E-13 | -0.906866073 | 0.882 | 0.807 | 7.59E-09    | YBX1       | 5 | IGLV3-1_plasma cell |
| 2647 | 6.57E-14 | -0.919091497 | 0.855 | 0.859 | 1.43E-09    | YWHAZ      | 5 | IGLV3-1_plasma cell |
| 2648 | 5.15E-08 | -0.920385918 | 0.184 | 0.469 | 0.001122379 | RCSD1      | 5 | IGLV3-1_plasma cell |
| 2649 | 3.00E-23 | -0.936798331 | 0.961 | 0.977 | 6.53E-19    | RPL14      | 5 | IGLV3-1_plasma cell |
| 2650 | 7.20E-22 | -0.936891046 | 0.947 | 0.947 | 1.57E-17    | HLA-A      | 5 | IGLV3-1_plasma cell |
| 2651 | 3.08E-25 | -0.944509622 | 0.961 | 0.985 | 6.71E-21    | RPL3       | 5 | IGLV3-1_plasma cell |
| 2652 | 4.08E-27 | -0.946172403 | 0.987 | 0.994 | 8.91E-23    | RPL8       | 5 | IGLV3-1_plasma cell |
| 2653 | 6.91E-08 | -0.950367743 | 0.237 | 0.493 | 0.001507914 | RNASE6     | 5 | IGLV3-1_plasma cell |
| 2654 | 1.60E-10 | -0.952570043 | 0.882 | 0.826 | 3.49E-06    | TOMM7      | 5 | IGLV3-1_plasma cell |
| 2655 | 9.99E-15 | -0.955279443 | 0.763 | 0.786 | 2.18E-10    | ARPC3      | 5 | IGLV3-1_plasma cell |
| 2656 | 3.63E-19 | -0.955912771 | 0.921 | 0.898 | 7.91E-15    | H3F3A      | 5 | IGLV3-1_plasma cell |
| 2657 | 2.10E-16 | -0.961528549 | 0.829 | 0.845 | 4.58E-12    | HNRNPA1    | 5 | IGLV3-1_plasma cell |
| 2658 | 9.04E-22 | -0.963956976 | 0.842 | 0.903 | 1.97E-17    | EEF1G      | 5 | IGLV3-1_plasma cell |
| 2659 | 3.29E-12 | -0.968889417 | 0.921 | 0.923 | 7.18E-08    | PFDN5      | 5 | IGLV3-1_plasma cell |
| 2660 | 4.97E-24 | -0.976282237 | 0.961 | 0.981 | 1.08E-19    | RPS14      | 5 | IGLV3-1_plasma cell |
| 2661 | 1.53E-25 | -0.979431281 | 0.961 | 0.97  | 3.35E-21    | RPL35      | 5 | IGLV3-1_plasma cell |
| 2662 | 4.49E-25 | -0.986356711 | 0.947 | 0.973 | 9.80E-21    | RPL6       | 5 | IGLV3-1_plasma cell |
| 2663 | 1.49E-22 | -0.997792344 | 0.934 | 0.92  | 3.26E-18    | RPL7       | 5 | IGLV3-1_plasma cell |
| 2664 | 1.04E-23 | -1.000466763 | 0.974 | 0.985 | 2.28E-19    | MT-ATP8    | 5 | IGLV3-1_plasma cell |
| 2665 | 6.18E-24 | -1.002243015 | 1     | 0.998 | 1.35E-19    | AC090498.1 | 5 | IGLV3-1_plasma cell |
| 2666 | 1.67E-29 | -1.006227666 | 0.974 | 0.988 | 3.65E-25    | RPS4X      | 5 | IGLV3-1_plasma cell |
| 2667 | 1.66E-19 | -1.00886254  | 0.855 | 0.913 | 3.63E-15    | PABPC1     | 5 | IGLV3-1_plasma cell |
| 2668 | 3.38E-10 | -1.010085857 | 0.118 | 0.462 | 7.36E-06    | COTL1      | 5 | IGLV3-1_plasma cell |
| 2669 | 7.01E-09 | -1.011693022 | 0.566 | 0.715 | 0.00015277  | GLTSCR2    | 5 | IGLV3-1_plasma cell |
| 2670 | 2.02E-14 | -1.013282792 | 0.75  | 0.797 | 4.42E-10    | RPL23      | 5 | IGLV3-1_plasma cell |
| 2671 | 6.80E-26 | -1.018403845 | 0.987 | 0.989 | 1.48E-21    | RPS28      | 5 | IGLV3-1_plasma cell |
| 2672 | 1.46E-08 | -1.022328694 | 0.342 | 0.575 | 0.000318696 | HLA-DMA    | 5 | IGLV3-1_plasma cell |
| 2673 | 7.29E-24 | -1.036081595 | 0.987 | 0.977 | 1.59E-19    | RPL35A     | 5 | IGLV3-1_plasma cell |
| 2674 | 2.86E-19 | -1.036347885 | 0.974 | 0.975 | 6.25E-15    | FTH1       | 5 | IGLV3-1_plasma cell |
| 2675 | 3.62E-27 | -1.051062254 | 1     | 0.999 | 7.89E-23    | MT-ATP6    | 5 | IGLV3-1_plasma cell |
| 2676 | 9.72E-25 | -1.065443386 | 0.961 | 0.972 | 2.12E-20    | RPS9       | 5 | IGLV3-1_plasma cell |
| 2677 | 5.21E-27 | -1.066136984 | 1     | 0.992 | 1.14E-22    | RPL18      | 5 | IGLV3-1_plasma cell |
| 2678 | 4.37E-30 | -1.068516865 | 1     | 1     | 9.53E-26    | MT-CO1     | 5 | IGLV3-1_plasma cell |
| 2679 | 3.78E-26 | -1.074758447 | 0.974 | 0.983 | 8.23E-22    | RPL29      | 5 | IGLV3-1_plasma cell |
| 2680 | 1.70E-26 | -1.076374312 | 0.947 | 0.974 | 3.71E-22    | GNB2L1     | 5 | IGLV3-1_plasma cell |
| 2681 | 1.57E-27 | -1.076611424 | 0.987 | 0.992 | 3.41E-23    | RPS15      | 5 | IGLV3-1_plasma cell |
| 2682 | 1.04E-18 | -1.079389251 | 0.868 | 0.863 | 2.28E-14    | RPL36A     | 5 | IGLV3-1_plasma cell |
| 2683 | 5.99E-15 | -1.083425412 | 0.803 | 0.819 | 1.31E-10    | HMGB1      | 5 | IGLV3-1_plasma cell |
| 2684 | 1.11E-06 | -1.089092054 | 0.105 | 0.361 | 0.024281193 | GPR183     | 5 | IGLV3-1_plasma cell |
| 2685 | 2.29E-27 | -1.113288314 | 0.961 | 0.962 | 5.00E-23    | RPS11      | 5 | IGLV3-1_plasma cell |
| 2686 | 1.37E-26 | -1.11369097  | 0.934 | 0.935 | 2.98E-22    | RPL4       | 5 | IGLV3-1_plasma cell |
| 2687 | 2.11E-26 | -1.114464638 | 0.974 | 0.973 | 4.60E-22    | RPL5       | 5 | IGLV3-1_plasma cell |
| 2688 | 2.88E-20 | -1.115085399 | 0.803 | 0.92  | 6.29E-16    | CD79A      | 5 | IGLV3-1_plasma cell |
| 2689 | 1.65E-09 | -1.115970174 | 0.632 | 0.723 | 3.59E-05    | COMMD6     | 5 | IGLV3-1_plasma cell |
| 2690 | 6.92E-25 | -1.120316273 | 0.895 | 0.919 | 1.51E-20    | RPL27      | 5 | IGLV3-1_plasma cell |
| 2691 | 8.42E-15 | -1.126121801 | 0.553 | 0.77  | 1.84E-10    | RPS4Y1     | 5 | IGLV3-1_plasma cell |
| 2692 | 9.80E-15 | -1.127235652 | 0.316 | 0.677 | 2.14E-10    | CORO1A     | 5 | IGLV3-1_plasma cell |
| 2693 | 1.21E-27 | -1.127774199 | 0.961 | 0.981 | 2.64E-23    | RPS5       | 5 | IGLV3-1_plasma cell |
| 2694 | 2.11E-19 | -1.128669078 | 0.921 | 0.917 | 4.61E-15    | RPL38      | 5 | IGLV3-1_plasma cell |
| 2695 | 4.93E-18 | -1.129036175 | 0.566 | 0.806 | 1.08E-13    | PTPRCAP    | 5 | IGLV3-1_plasma cell |

|      |          |              |       |       |             |          |   |                     |
|------|----------|--------------|-------|-------|-------------|----------|---|---------------------|
| 2696 | 2.32E-21 | -1.140586489 | 0.855 | 0.891 | 5.05E-17    | RPL31    | 5 | IGLV3-1_plasma cell |
| 2697 | 2.42E-27 | -1.147757462 | 0.987 | 0.975 | 5.28E-23    | RPL36    | 5 | IGLV3-1_plasma cell |
| 2698 | 1.66E-25 | -1.152284735 | 0.908 | 0.923 | 3.63E-21    | PPIA     | 5 | IGLV3-1_plasma cell |
| 2699 | 1.56E-25 | -1.156804599 | 1     | 0.997 | 3.40E-21    | EEF1A1   | 5 | IGLV3-1_plasma cell |
| 2700 | 1.97E-24 | -1.162077286 | 0.961 | 0.951 | 4.30E-20    | RPL9     | 5 | IGLV3-1_plasma cell |
| 2701 | 1.11E-30 | -1.163544561 | 0.974 | 0.983 | 2.42E-26    | RPS16    | 5 | IGLV3-1_plasma cell |
| 2702 | 1.02E-21 | -1.16554505  | 0.961 | 0.981 | 2.22E-17    | TMSB10   | 5 | IGLV3-1_plasma cell |
| 2703 | 1.48E-30 | -1.169637821 | 1     | 0.979 | 3.24E-26    | RPL15    | 5 | IGLV3-1_plasma cell |
| 2704 | 4.42E-14 | -1.185658152 | 0.224 | 0.613 | 9.64E-10    | LIMD2    | 5 | IGLV3-1_plasma cell |
| 2705 | 4.07E-14 | -1.187181667 | 0.434 | 0.695 | 8.88E-10    | ARHGDI8  | 5 | IGLV3-1_plasma cell |
| 2706 | 8.27E-29 | -1.188478295 | 0.934 | 0.959 | 1.80E-24    | UBA52    | 5 | IGLV3-1_plasma cell |
| 2707 | 2.99E-27 | -1.189468007 | 0.908 | 0.974 | 6.53E-23    | RPL17    | 5 | IGLV3-1_plasma cell |
| 2708 | 4.39E-30 | -1.192951686 | 0.947 | 0.978 | 9.56E-26    | RPL37A   | 5 | IGLV3-1_plasma cell |
| 2709 | 3.73E-30 | -1.194894517 | 0.987 | 0.991 | 8.14E-26    | RPS15A   | 5 | IGLV3-1_plasma cell |
| 2710 | 7.09E-32 | -1.199585435 | 0.987 | 0.982 | 1.55E-27    | RPS7     | 5 | IGLV3-1_plasma cell |
| 2711 | 7.12E-29 | -1.202377057 | 0.974 | 0.991 | 1.55E-24    | RPS18    | 5 | IGLV3-1_plasma cell |
| 2712 | 5.69E-15 | -1.204785257 | 0.697 | 0.794 | 1.24E-10    | RPS20    | 5 | IGLV3-1_plasma cell |
| 2713 | 1.09E-27 | -1.210868253 | 1     | 0.992 | 2.39E-23    | PTMA     | 5 | IGLV3-1_plasma cell |
| 2714 | 4.19E-30 | -1.218094648 | 0.987 | 0.99  | 9.15E-26    | RPLP2    | 5 | IGLV3-1_plasma cell |
| 2715 | 3.65E-26 | -1.22577348  | 0.974 | 0.974 | 7.95E-22    | RPS25    | 5 | IGLV3-1_plasma cell |
| 2716 | 3.30E-24 | -1.229446992 | 0.947 | 0.991 | 7.19E-20    | ACTB     | 5 | IGLV3-1_plasma cell |
| 2717 | 1.60E-24 | -1.240047088 | 0.987 | 0.989 | 3.49E-20    | RPL34    | 5 | IGLV3-1_plasma cell |
| 2718 | 1.25E-24 | -1.260902637 | 0.974 | 0.974 | 2.73E-20    | RPL12    | 5 | IGLV3-1_plasma cell |
| 2719 | 3.34E-28 | -1.269443371 | 0.947 | 0.973 | 7.29E-24    | RPL22    | 5 | IGLV3-1_plasma cell |
| 2720 | 1.28E-14 | -1.276872689 | 0.237 | 0.65  | 2.78E-10    | PTPRC    | 5 | IGLV3-1_plasma cell |
| 2721 | 1.54E-30 | -1.278200633 | 0.987 | 0.994 | 3.35E-26    | RPL28    | 5 | IGLV3-1_plasma cell |
| 2722 | 2.03E-31 | -1.288829417 | 0.934 | 0.974 | 4.44E-27    | RPL23A   | 5 | IGLV3-1_plasma cell |
| 2723 | 1.30E-30 | -1.291776696 | 0.974 | 0.982 | 2.83E-26    | RPS13    | 5 | IGLV3-1_plasma cell |
| 2724 | 2.98E-29 | -1.296283003 | 0.934 | 0.985 | 6.49E-25    | RPS10    | 5 | IGLV3-1_plasma cell |
| 2725 | 3.85E-33 | -1.297458036 | 0.934 | 0.983 | 8.39E-29    | RPS24    | 5 | IGLV3-1_plasma cell |
| 2726 | 4.28E-33 | -1.300104501 | 0.987 | 0.995 | 9.32E-29    | RPS8     | 5 | IGLV3-1_plasma cell |
| 2727 | 6.33E-25 | -1.303501057 | 0.947 | 0.952 | 1.38E-20    | RPS29    | 5 | IGLV3-1_plasma cell |
| 2728 | 6.63E-13 | -1.312190444 | 0.434 | 0.699 | 1.45E-08    | ZFAS1    | 5 | IGLV3-1_plasma cell |
| 2729 | 2.23E-07 | -1.322565317 | 0.434 | 0.592 | 0.004868472 | ZFP36L1  | 5 | IGLV3-1_plasma cell |
| 2730 | 2.56E-31 | -1.324488963 | 0.974 | 0.996 | 5.58E-27    | RPL11    | 5 | IGLV3-1_plasma cell |
| 2731 | 7.02E-32 | -1.326863371 | 0.974 | 0.991 | 1.53E-27    | RPL19    | 5 | IGLV3-1_plasma cell |
| 2732 | 3.39E-23 | -1.331047408 | 1     | 0.985 | 7.39E-19    | RPL39    | 5 | IGLV3-1_plasma cell |
| 2733 | 7.44E-08 | -1.343830389 | 0.276 | 0.515 | 0.001622684 | SLC2A3   | 5 | IGLV3-1_plasma cell |
| 2734 | 4.83E-32 | -1.343941382 | 0.987 | 0.99  | 1.05E-27    | RPS3     | 5 | IGLV3-1_plasma cell |
| 2735 | 8.87E-30 | -1.346675605 | 0.974 | 0.984 | 1.93E-25    | RPL37    | 5 | IGLV3-1_plasma cell |
| 2736 | 8.87E-29 | -1.354463514 | 0.961 | 0.976 | 1.93E-24    | RPL21    | 5 | IGLV3-1_plasma cell |
| 2737 | 4.26E-29 | -1.364498602 | 0.947 | 0.966 | 9.29E-25    | RPL13A   | 5 | IGLV3-1_plasma cell |
| 2738 | 2.88E-31 | -1.370628364 | 0.974 | 0.989 | 6.27E-27    | RPS21    | 5 | IGLV3-1_plasma cell |
| 2739 | 1.09E-30 | -1.377794598 | 1     | 0.994 | 2.38E-26    | RPL13    | 5 | IGLV3-1_plasma cell |
| 2740 | 3.72E-29 | -1.381595591 | 0.974 | 0.983 | 8.10E-25    | RPS3A    | 5 | IGLV3-1_plasma cell |
| 2741 | 1.35E-28 | -1.400234366 | 0.961 | 0.98  | 2.94E-24    | RPL26    | 5 | IGLV3-1_plasma cell |
| 2742 | 2.54E-31 | -1.407414011 | 0.974 | 0.988 | 5.54E-27    | RPL18A   | 5 | IGLV3-1_plasma cell |
| 2743 | 3.94E-10 | -1.417138382 | 0.763 | 0.833 | 8.58E-06    | CXCR4    | 5 | IGLV3-1_plasma cell |
| 2744 | 4.77E-27 | -1.418755544 | 1     | 0.985 | 1.04E-22    | RPL32    | 5 | IGLV3-1_plasma cell |
| 2745 | 1.16E-26 | -1.438044771 | 0.987 | 0.987 | 2.54E-22    | RPL30    | 5 | IGLV3-1_plasma cell |
| 2746 | 1.66E-33 | -1.446577535 | 0.895 | 0.977 | 3.62E-29    | RPS2     | 5 | IGLV3-1_plasma cell |
| 2747 | 7.19E-17 | -1.464174881 | 1     | 0.993 | 1.57E-12    | CD74     | 5 | IGLV3-1_plasma cell |
| 2748 | 1.06E-32 | -1.476140501 | 0.961 | 0.979 | 2.30E-28    | RPS6     | 5 | IGLV3-1_plasma cell |
| 2749 | 3.53E-32 | -1.477138269 | 0.934 | 0.966 | 7.69E-28    | RPL10A   | 5 | IGLV3-1_plasma cell |
| 2750 | 5.03E-29 | -1.49137484  | 0.987 | 0.988 | 1.10E-24    | RPS12    | 5 | IGLV3-1_plasma cell |
| 2751 | 3.87E-30 | -1.498838905 | 0.974 | 0.989 | 8.45E-26    | RPS27A   | 5 | IGLV3-1_plasma cell |
| 2752 | 7.13E-31 | -1.536396845 | 0.974 | 0.989 | 1.55E-26    | RPS23    | 5 | IGLV3-1_plasma cell |
| 2753 | 7.66E-42 | -1.611030705 | 1     | 1     | 1.67E-37    | MT-CO3   | 5 | IGLV3-1_plasma cell |
| 2754 | 1.58E-19 | -1.652375487 | 0.513 | 0.845 | 3.44E-15    | LAPTM5   | 5 | IGLV3-1_plasma cell |
| 2755 | 1.85E-31 | -1.66115252  | 1     | 0.995 | 4.04E-27    | RPS19    | 5 | IGLV3-1_plasma cell |
| 2756 | 4.25E-25 | -1.686339497 | 0.987 | 0.984 | 9.28E-21    | RPS27    | 5 | IGLV3-1_plasma cell |
| 2757 | 9.28E-34 | -1.735997548 | 0.868 | 0.963 | 2.02E-29    | RPSA     | 5 | IGLV3-1_plasma cell |
| 2758 | 1.59E-24 | -1.8357033   | 0.461 | 0.856 | 3.48E-20    | HLA-DQB1 | 5 | IGLV3-1_plasma cell |
| 2759 | 1.14E-24 | -1.843209755 | 0.158 | 0.762 | 2.49E-20    | HLA-DRB5 | 5 | IGLV3-1_plasma cell |
| 2760 | 2.35E-13 | -2.095824993 | 0.789 | 0.907 | 5.11E-09    | BTG1     | 5 | IGLV3-1_plasma cell |
| 2761 | 4.15E-31 | -2.103401764 | 0.211 | 0.848 | 9.05E-27    | HLA-DPA1 | 5 | IGLV3-1_plasma cell |
| 2762 | 3.43E-21 | -2.131233188 | 0.382 | 0.794 | 7.47E-17    | CD37     | 5 | IGLV3-1_plasma cell |
| 2763 | 3.88E-25 | -2.13532123  | 0.132 | 0.753 | 8.47E-21    | HLA-DPB1 | 5 | IGLV3-1_plasma cell |
| 2764 | 6.24E-10 | -2.146385687 | 0.237 | 0.526 | 1.36E-05    | CD69     | 5 | IGLV3-1_plasma cell |
| 2765 | 3.46E-27 | -2.264654458 | 0.132 | 0.775 | 7.55E-23    | CD52     | 5 | IGLV3-1_plasma cell |
| 2766 | 2.32E-32 | -2.470572299 | 0.276 | 0.878 | 5.07E-28    | HLA-DRB1 | 5 | IGLV3-1_plasma cell |

|      |           |              |       |       |             |          |   |                     |
|------|-----------|--------------|-------|-------|-------------|----------|---|---------------------|
| 2767 | 4.57E-30  | -3.313857281 | 0.118 | 0.812 | 9.96E-26    | HLA-DRA  | 5 | IGLV3-1_plasma cell |
| 2768 | 3.19E-10  | 1.533527211  | 0.553 | 0.21  | 6.95E-06    | MT2A     | 6 | MT2A_B              |
| 2769 | 5.05E-169 | 1.486172213  | 0.83  | 0.02  | 1.10E-164   | FGR      | 6 | MT2A_B              |
| 2770 | 8.61E-62  | 1.466909004  | 0.766 | 0.074 | 1.88E-57    | FCRL3    | 6 | MT2A_B              |
| 2771 | 1.80E-11  | 1.356271972  | 0.681 | 0.396 | 3.94E-07    | FCRL5    | 6 | MT2A_B              |
| 2772 | 4.02E-10  | 1.330323194  | 0.638 | 0.356 | 8.76E-06    | CIB1     | 6 | MT2A_B              |
| 2773 | 6.18E-12  | 1.275424122  | 0.596 | 0.239 | 1.35E-07    | ADGRE5   | 6 | MT2A_B              |
| 2774 | 1.22E-22  | 1.219083185  | 1     | 0.72  | 2.66E-18    | HLA-DPB1 | 6 | MT2A_B              |
| 2775 | 2.48E-20  | 1.212372142  | 0.957 | 0.448 | 5.40E-16    | MS4A1    | 6 | MT2A_B              |
| 2776 | 5.26E-36  | 1.212038215  | 0.617 | 0.09  | 1.15E-31    | TNFRSF1B | 6 | MT2A_B              |
| 2777 | 4.60E-17  | 1.137557482  | 0.957 | 0.742 | 1.00E-12    | CD52     | 6 | MT2A_B              |
| 2778 | 3.25E-20  | 1.134376566  | 1     | 0.682 | 7.09E-16    | HLA-DQA1 | 6 | MT2A_B              |
| 2779 | 1.35E-15  | 1.132749945  | 0.936 | 0.731 | 2.95E-11    | HLA-DRB5 | 6 | MT2A_B              |
| 2780 | 1.41E-23  | 1.130507931  | 0.702 | 0.16  | 3.08E-19    | CD72     | 6 | MT2A_B              |
| 2781 | 4.22E-10  | 1.101603278  | 0.766 | 0.416 | 9.21E-06    | CRIP1    | 6 | MT2A_B              |
| 2782 | 7.27E-19  | 1.10148574   | 0.298 | 0.037 | 1.59E-14    | CST7     | 6 | MT2A_B              |
| 2783 | 8.50E-24  | 1.051731042  | 0.596 | 0.113 | 1.85E-19    | ZEB2     | 6 | MT2A_B              |
| 2784 | 2.07E-20  | 1.038093537  | 1     | 0.816 | 4.52E-16    | HLA-DPA1 | 6 | MT2A_B              |
| 2785 | 1.49E-19  | 1.011491231  | 1     | 0.826 | 3.25E-15    | LAPTM5   | 6 | MT2A_B              |
| 2786 | 8.74E-14  | 1.010723161  | 0.894 | 0.509 | 1.91E-09    | DUSP2    | 6 | MT2A_B              |
| 2787 | 2.14E-11  | 0.994441861  | 0.745 | 0.402 | 4.66E-07    | TSPAN3   | 6 | MT2A_B              |
| 2788 | 5.65E-24  | 0.994199301  | 0.362 | 0.042 | 1.23E-19    | NKG7     | 6 | MT2A_B              |
| 2789 | 7.98E-12  | 0.992557582  | 0.745 | 0.353 | 1.74E-07    | MAP3K8   | 6 | MT2A_B              |
| 2790 | 2.66E-10  | 0.979813931  | 0.617 | 0.288 | 5.79E-06    | LY6E     | 6 | MT2A_B              |
| 2791 | 2.61E-23  | 0.972398538  | 1     | 0.993 | 5.70E-19    | CD74     | 6 | MT2A_B              |
| 2792 | 2.16E-105 | 0.95341768   | 0.404 | 0.005 | 4.71E-101   | SYT1     | 6 | MT2A_B              |
| 2793 | 5.44E-14  | 0.953281644  | 0.574 | 0.188 | 1.19E-09    | ITGB2    | 6 | MT2A_B              |
| 2794 | 1.75E-07  | 0.935323693  | 0.66  | 0.449 | 0.003817398 | RHOB     | 6 | MT2A_B              |
| 2795 | 5.74E-09  | 0.933710673  | 0.511 | 0.218 | 0.000125111 | PLEK     | 6 | MT2A_B              |
| 2796 | 1.60E-15  | 0.929143333  | 0.979 | 0.835 | 3.48E-11    | HLA-DQB1 | 6 | MT2A_B              |
| 2797 | 2.13E-16  | 0.927667943  | 1     | 0.913 | 4.65E-12    | CD79A    | 6 | MT2A_B              |
| 2798 | 1.20E-12  | 0.923632741  | 0.723 | 0.373 | 2.62E-08    | LITAF    | 6 | MT2A_B              |
| 2799 | 1.53E-12  | 0.918331971  | 0.681 | 0.268 | 3.33E-08    | FCRLA    | 6 | MT2A_B              |
| 2800 | 3.97E-23  | 0.913243644  | 0.426 | 0.063 | 8.65E-19    | MPP6     | 6 | MT2A_B              |
| 2801 | 1.84E-17  | 0.90816974   | 0.617 | 0.146 | 4.02E-13    | CD22     | 6 | MT2A_B              |
| 2802 | 2.42E-20  | 0.903247508  | 0.617 | 0.134 | 5.27E-16    | TMEM2    | 6 | MT2A_B              |
| 2803 | 9.13E-17  | 0.889874903  | 1     | 0.776 | 1.99E-12    | HLA-DRA  | 6 | MT2A_B              |
| 2804 | 8.85E-15  | 0.878094163  | 1     | 0.848 | 1.93E-10    | HLA-DRB1 | 6 | MT2A_B              |
| 2805 | 3.71E-11  | 0.874266195  | 0.468 | 0.143 | 8.09E-07    | CLECL1   | 6 | MT2A_B              |
| 2806 | 2.90E-08  | 0.872713663  | 0.596 | 0.302 | 0.000631618 | CSK      | 6 | MT2A_B              |
| 2807 | 9.79E-75  | 0.852731225  | 0.404 | 0.011 | 2.13E-70    | GPR137B  | 6 | MT2A_B              |
| 2808 | 1.56E-11  | 0.849585582  | 0.681 | 0.304 | 3.40E-07    | CD19     | 6 | MT2A_B              |
| 2809 | 5.35E-11  | 0.846203531  | 0.787 | 0.439 | 1.17E-06    | COTL1    | 6 | MT2A_B              |
| 2810 | 3.95E-09  | 0.832852847  | 0.468 | 0.158 | 8.61E-05    | ALOX5AP  | 6 | MT2A_B              |
| 2811 | 5.21E-25  | 0.830094705  | 0.532 | 0.08  | 1.14E-20    | SCIMP    | 6 | MT2A_B              |
| 2812 | 1.04E-16  | 0.827637079  | 1     | 0.946 | 2.26E-12    | TMSB4X   | 6 | MT2A_B              |
| 2813 | 2.46E-07  | 0.82749368   | 0.489 | 0.225 | 0.005372566 | SERPINB1 | 6 | MT2A_B              |
| 2814 | 8.29E-12  | 0.826042707  | 0.915 | 0.625 | 1.81E-07    | PTPRC    | 6 | MT2A_B              |
| 2815 | 1.95E-07  | 0.822820211  | 0.489 | 0.228 | 0.004244286 | LRMP     | 6 | MT2A_B              |
| 2816 | 8.89E-13  | 0.798200142  | 0.553 | 0.16  | 1.94E-08    | BCL2A1   | 6 | MT2A_B              |
| 2817 | 1.72E-08  | 0.794038406  | 0.766 | 0.582 | 0.000374845 | CD48     | 6 | MT2A_B              |
| 2818 | 6.24E-10  | 0.770485813  | 0.383 | 0.101 | 1.36E-05    | KMO      | 6 | MT2A_B              |
| 2819 | 7.51E-07  | 0.769050672  | 0.723 | 0.572 | 0.01636871  | GDI2     | 6 | MT2A_B              |
| 2820 | 4.53E-16  | 0.767541034  | 0.596 | 0.148 | 9.89E-12    | MTSS1    | 6 | MT2A_B              |
| 2821 | 4.76E-31  | 0.766367646  | 0.468 | 0.051 | 1.04E-26    | RIN3     | 6 | MT2A_B              |
| 2822 | 2.51E-10  | 0.761338525  | 0.872 | 0.794 | 5.47E-06    | PTPRCAP  | 6 | MT2A_B              |
| 2823 | 3.34E-08  | 0.759052291  | 0.702 | 0.439 | 0.000728726 | POU2F2   | 6 | MT2A_B              |
| 2824 | 1.73E-07  | 0.754499039  | 0.489 | 0.233 | 0.003765072 | S100A11  | 6 | MT2A_B              |
| 2825 | 1.07E-07  | 0.749902249  | 0.723 | 0.494 | 0.002343709 | PTPN6    | 6 | MT2A_B              |
| 2826 | 4.53E-12  | 0.742069679  | 0.362 | 0.078 | 9.87E-08    | ARL4D    | 6 | MT2A_B              |
| 2827 | 9.92E-11  | 0.731426303  | 0.809 | 0.497 | 2.16E-06    | ATP6V0E1 | 6 | MT2A_B              |
| 2828 | 1.14E-40  | 0.730396567  | 0.34  | 0.019 | 2.48E-36    | MS4A7    | 6 | MT2A_B              |
| 2829 | 8.89E-36  | 0.728956479  | 0.298 | 0.017 | 1.94E-31    | HCK      | 6 | MT2A_B              |
| 2830 | 8.70E-09  | 0.722401599  | 0.426 | 0.148 | 0.00018975  | ACP5     | 6 | MT2A_B              |
| 2831 | 4.82E-08  | 0.71861221   | 0.766 | 0.548 | 0.001050458 | 7-Sep    | 6 | MT2A_B              |
| 2832 | 7.26E-13  | 0.715541817  | 0.234 | 0.034 | 1.58E-08    | SPON2    | 6 | MT2A_B              |
| 2833 | 3.24E-12  | 0.701334202  | 0.191 | 0.023 | 7.07E-08    | PPP1R14A | 6 | MT2A_B              |
| 2834 | 1.22E-11  | 0.698072354  | 0.936 | 0.855 | 2.67E-07    | HLA-E    | 6 | MT2A_B              |
| 2835 | 7.90E-19  | 0.694857697  | 0.362 | 0.05  | 1.72E-14    | NCR3     | 6 | MT2A_B              |
| 2836 | 1.67E-09  | 0.689248393  | 0.766 | 0.373 | 3.64E-05    | BANK1    | 6 | MT2A_B              |
| 2837 | 1.97E-10  | 0.665648158  | 0.298 | 0.061 | 4.29E-06    | GPR18    | 6 | MT2A_B              |

|      |          |             |       |       |             |             |   |        |
|------|----------|-------------|-------|-------|-------------|-------------|---|--------|
| 2838 | 1.53E-10 | 0.659938841 | 0.34  | 0.083 | 3.34E-06    | CLN8        | 6 | MT2A_B |
| 2839 | 5.00E-09 | 0.659724904 | 0.851 | 0.694 | 0.000109061 | ARPC2       | 6 | MT2A_B |
| 2840 | 1.50E-12 | 0.646976528 | 0.447 | 0.107 | 3.27E-08    | EBF1        | 6 | MT2A_B |
| 2841 | 2.86E-38 | 0.63523808  | 0.298 | 0.015 | 6.23E-34    | ITGB2-AS1   | 6 | MT2A_B |
| 2842 | 8.09E-31 | 0.634915972 | 0.277 | 0.017 | 1.76E-26    | SPATA13     | 6 | MT2A_B |
| 2843 | 1.53E-06 | 0.633880094 | 0.553 | 0.266 | 0.033293916 | ZNF331      | 6 | MT2A_B |
| 2844 | 1.96E-08 | 0.621423766 | 0.277 | 0.068 | 0.00042687  | KLK1        | 6 | MT2A_B |
| 2845 | 1.29E-38 | 0.614260051 | 0.213 | 0.006 | 2.81E-34    | LINC01013   | 6 | MT2A_B |
| 2846 | 1.20E-07 | 0.609148854 | 0.362 | 0.123 | 0.002625266 | CYTH4       | 6 | MT2A_B |
| 2847 | 1.01E-06 | 0.605259826 | 0.553 | 0.29  | 0.022067955 | MEF2A       | 6 | MT2A_B |
| 2848 | 1.16E-06 | 0.600607262 | 0.66  | 0.409 | 0.025191904 | CNPY3       | 6 | MT2A_B |
| 2849 | 8.58E-30 | 0.59917293  | 0.213 | 0.01  | 1.87E-25    | RP11-444D3. | 6 | MT2A_B |
| 2850 | 2.41E-11 | 0.59719556  | 0.362 | 0.081 | 5.25E-07    | CBLB        | 6 | MT2A_B |
| 2851 | 2.17E-06 | 0.588801961 | 0.426 | 0.167 | 0.047305981 | PARP15      | 6 | MT2A_B |
| 2852 | 3.95E-26 | 0.587988114 | 0.277 | 0.021 | 8.61E-22    | CD84        | 6 | MT2A_B |
| 2853 | 3.55E-10 | 0.579286078 | 0.255 | 0.05  | 7.74E-06    | IFNLR1      | 6 | MT2A_B |
| 2854 | 5.30E-10 | 0.574777656 | 0.681 | 0.25  | 1.16E-05    | LBH         | 6 | MT2A_B |
| 2855 | 1.95E-08 | 0.567414209 | 0.894 | 0.75  | 0.000425547 | RHOA        | 6 | MT2A_B |
| 2856 | 1.68E-07 | 0.563764152 | 0.957 | 0.753 | 0.00366111  | EZR         | 6 | MT2A_B |
| 2857 | 1.43E-16 | 0.560900994 | 0.234 | 0.026 | 3.12E-12    | FGD4        | 6 | MT2A_B |
| 2858 | 1.05E-10 | 0.559546892 | 1     | 0.973 | 2.29E-06    | MT-ND4      | 6 | MT2A_B |
| 2859 | 2.02E-07 | 0.557839013 | 0.532 | 0.214 | 0.004410993 | TRBC2       | 6 | MT2A_B |
| 2860 | 1.84E-06 | 0.554485264 | 0.872 | 0.739 | 0.040134967 | SH3BGRL3    | 6 | MT2A_B |
| 2861 | 9.03E-08 | 0.551072227 | 0.574 | 0.225 | 0.001969096 | 1-Mar       | 6 | MT2A_B |
| 2862 | 4.97E-59 | 0.543104169 | 0.213 | 0.002 | 1.08E-54    | ITGAX       | 6 | MT2A_B |
| 2863 | 1.18E-10 | 0.53806691  | 0.319 | 0.071 | 2.57E-06    | SH3BP2      | 6 | MT2A_B |
| 2864 | 1.35E-06 | 0.514207158 | 0.809 | 0.591 | 0.029438292 | LIMD2       | 6 | MT2A_B |
| 2865 | 8.12E-12 | 0.507026626 | 1     | 1     | 1.77E-07    | MALAT1      | 6 | MT2A_B |
| 2866 | 6.53E-09 | 0.505261252 | 0.213 | 0.039 | 0.000142475 | TTN         | 6 | MT2A_B |
| 2867 | 1.29E-06 | 0.500559206 | 0.979 | 0.874 | 0.028174943 | PFN1        | 6 | MT2A_B |
| 2868 | 4.97E-15 | 0.497210295 | 0.149 | 0.011 | 1.08E-10    | GALNTL6     | 6 | MT2A_B |
| 2869 | 5.95E-10 | 0.490542486 | 0.213 | 0.035 | 1.30E-05    | MEF2C-AS1   | 6 | MT2A_B |
| 2870 | 1.01E-09 | 0.474962935 | 0.277 | 0.058 | 2.20E-05    | PPP1R16B    | 6 | MT2A_B |
| 2871 | 2.37E-09 | 0.470076404 | 0.234 | 0.044 | 5.17E-05    | LRRK2       | 6 | MT2A_B |
| 2872 | 4.03E-08 | 0.468586995 | 0.17  | 0.029 | 0.000878372 | TFEC        | 6 | MT2A_B |
| 2873 | 1.96E-06 | 0.46810161  | 0.532 | 0.217 | 0.042691198 | ARHGAP24    | 6 | MT2A_B |
| 2874 | 1.69E-07 | 0.46746824  | 0.298 | 0.078 | 0.003682255 | JAZF1       | 6 | MT2A_B |
| 2875 | 2.96E-09 | 0.462772263 | 0.234 | 0.045 | 6.46E-05    | INPP5F      | 6 | MT2A_B |
| 2876 | 5.75E-07 | 0.462105636 | 0.979 | 0.86  | 0.012529501 | RPL36A      | 6 | MT2A_B |
| 2877 | 3.61E-08 | 0.455991352 | 0.979 | 0.958 | 0.000787486 | UBA52       | 6 | MT2A_B |
| 2878 | 1.14E-08 | 0.454939545 | 0.149 | 0.021 | 0.000247941 | HOPX        | 6 | MT2A_B |
| 2879 | 4.37E-25 | 0.454822949 | 0.191 | 0.01  | 9.52E-21    | SLC11A1     | 6 | MT2A_B |
| 2880 | 1.74E-11 | 0.449568504 | 1     | 1     | 3.80E-07    | MT-CO3      | 6 | MT2A_B |
| 2881 | 9.03E-11 | 0.447001645 | 1     | 0.974 | 1.97E-06    | FTH1        | 6 | MT2A_B |
| 2882 | 6.24E-09 | 0.445609729 | 0.255 | 0.057 | 0.00013609  | UBASH3B     | 6 | MT2A_B |
| 2883 | 4.54E-09 | 0.441277384 | 1     | 0.999 | 9.91E-05    | MT-ATP6     | 6 | MT2A_B |
| 2884 | 1.24E-15 | 0.438744668 | 0.234 | 0.026 | 2.71E-11    | LIMS2       | 6 | MT2A_B |
| 2885 | 1.71E-07 | 0.43854235  | 1     | 0.982 | 0.003734743 | HLA-B       | 6 | MT2A_B |
| 2886 | 7.86E-08 | 0.430643372 | 0.979 | 0.974 | 0.001713663 | RPL12       | 6 | MT2A_B |
| 2887 | 1.02E-15 | 0.419540725 | 0.149 | 0.01  | 2.23E-11    | TUBB6       | 6 | MT2A_B |
| 2888 | 4.20E-07 | 0.41556177  | 0.979 | 0.95  | 0.009152242 | MT-ND2      | 6 | MT2A_B |
| 2889 | 8.92E-25 | 0.414926762 | 0.17  | 0.007 | 1.94E-20    | MCTP1       | 6 | MT2A_B |
| 2890 | 1.33E-07 | 0.413217801 | 0.255 | 0.061 | 0.002907223 | MNDA        | 6 | MT2A_B |
| 2891 | 2.25E-13 | 0.411769579 | 1     | 1     | 4.92E-09    | MT-CO1      | 6 | MT2A_B |
| 2892 | 4.41E-14 | 0.410465419 | 0.234 | 0.029 | 9.62E-10    | SGK223      | 6 | MT2A_B |
| 2893 | 7.42E-07 | 0.409894738 | 0.213 | 0.051 | 0.016178523 | SACS        | 6 | MT2A_B |
| 2894 | 1.31E-15 | 0.409582244 | 0.213 | 0.022 | 2.85E-11    | LCP2        | 6 | MT2A_B |
| 2895 | 2.05E-06 | 0.40422042  | 0.957 | 0.9   | 0.044682346 | OAZ1        | 6 | MT2A_B |
| 2896 | 1.33E-06 | 0.398906282 | 0.957 | 0.892 | 0.02910382  | COX4I1      | 6 | MT2A_B |
| 2897 | 5.71E-07 | 0.397198773 | 1     | 0.989 | 0.012460567 | ACTB        | 6 | MT2A_B |
| 2898 | 1.74E-07 | 0.390212007 | 1     | 0.997 | 0.00380181  | MT-ND3      | 6 | MT2A_B |
| 2899 | 9.39E-08 | 0.378217293 | 0.17  | 0.03  | 0.00204785  | VNN2        | 6 | MT2A_B |
| 2900 | 4.89E-07 | 0.37695912  | 1     | 0.983 | 0.010663866 | RPL37       | 6 | MT2A_B |
| 2901 | 2.65E-07 | 0.375950786 | 0.17  | 0.031 | 0.005770541 | MX2         | 6 | MT2A_B |
| 2902 | 1.55E-08 | 0.368115774 | 0.553 | 0.174 | 0.000339063 | HLA-DMB     | 6 | MT2A_B |
| 2903 | 1.65E-12 | 0.355377498 | 0.17  | 0.018 | 3.61E-08    | TBX21       | 6 | MT2A_B |
| 2904 | 2.28E-07 | 0.352844781 | 1     | 0.998 | 0.004964431 | AC090498.1  | 6 | MT2A_B |
| 2905 | 9.10E-29 | 0.350297029 | 0.17  | 0.006 | 1.98E-24    | LILRB2      | 6 | MT2A_B |
| 2906 | 6.15E-07 | 0.350001206 | 0.149 | 0.026 | 0.013405231 | NKRF        | 6 | MT2A_B |
| 2907 | 8.81E-08 | 0.348283559 | 0.213 | 0.042 | 0.001921488 | FAM46A      | 6 | MT2A_B |
| 2908 | 1.49E-10 | 0.34714444  | 1     | 0.998 | 3.24E-06    | B2M         | 6 | MT2A_B |



|      |          |              |       |       |             |            |   |        |
|------|----------|--------------|-------|-------|-------------|------------|---|--------|
| 2909 | 2.65E-16 | 0.340857371  | 0.128 | 0.007 | 5.79E-12    | GAS7       | 6 | MT2A_B |
| 2910 | 6.03E-08 | 0.338071202  | 0.213 | 0.042 | 0.001315103 | SCML4      | 6 | MT2A_B |
| 2911 | 9.31E-07 | 0.337575067  | 0.298 | 0.083 | 0.020308557 | HLA-DOA    | 6 | MT2A_B |
| 2912 | 4.52E-10 | 0.33682786   | 0.149 | 0.018 | 9.87E-06    | DPYSL2     | 6 | MT2A_B |
| 2913 | 3.37E-07 | 0.332216479  | 0.574 | 0.243 | 0.007346823 | HSPB1      | 6 | MT2A_B |
| 2914 | 1.91E-42 | 0.329425441  | 0.106 | 0     | 4.16E-38    | RBPMS2     | 6 | MT2A_B |
| 2915 | 1.15E-09 | 0.325688526  | 1     | 0.999 | 2.52E-05    | MT-CYB     | 6 | MT2A_B |
| 2916 | 6.85E-09 | 0.319526582  | 0.128 | 0.015 | 0.000149429 | C11orf21   | 6 | MT2A_B |
| 2917 | 2.09E-13 | 0.316212055  | 0.191 | 0.021 | 4.56E-09    | TP53I11    | 6 | MT2A_B |
| 2918 | 3.75E-07 | 0.314169927  | 1     | 0.985 | 0.008174311 | MT-ATP8    | 6 | MT2A_B |
| 2919 | 5.20E-07 | 0.306887896  | 0.149 | 0.026 | 0.01134939  | RP11-25K19 | 6 | MT2A_B |
| 2920 | 1.88E-26 | 0.301628494  | 0.106 | 0.002 | 4.10E-22    | SIGLEC6    | 6 | MT2A_B |
| 2921 | 3.05E-30 | 0.299038433  | 0.106 | 0.001 | 6.65E-26    | MFAP5      | 6 | MT2A_B |
| 2922 | 5.32E-07 | 0.295340904  | 0.106 | 0.014 | 0.011596607 | CAB39L     | 6 | MT2A_B |
| 2923 | 4.56E-08 | 0.289573054  | 0.106 | 0.011 | 0.000993928 | LINC01504  | 6 | MT2A_B |
| 2924 | 1.89E-23 | 0.283748806  | 0.106 | 0.002 | 4.11E-19    | DUSP15     | 6 | MT2A_B |
| 2925 | 1.69E-11 | 0.270453268  | 0.106 | 0.007 | 3.69E-07    | ZFP30      | 6 | MT2A_B |
| 2926 | 1.23E-12 | 0.267975809  | 0.128 | 0.01  | 2.68E-08    | ANK3       | 6 | MT2A_B |
| 2927 | 5.13E-16 | 0.26571727   | 0.106 | 0.005 | 1.12E-11    | CREB5      | 6 | MT2A_B |
| 2928 | 1.09E-12 | 0.258556421  | 0.149 | 0.013 | 2.39E-08    | GRAP2      | 6 | MT2A_B |
| 2929 | 8.94E-07 | 0.255844464  | 1     | 0.999 | 0.019503185 | MT-ND4L    | 6 | MT2A_B |
| 2930 | 2.26E-17 | 0.250115408  | 0.106 | 0.004 | 4.93E-13    | SYT11      | 6 | MT2A_B |
| 2931 | 7.28E-07 | -0.753436066 | 0.106 | 0.483 | 0.015885208 | FKBP2      | 6 | MT2A_B |
| 2932 | 7.89E-07 | -0.823597694 | 0.149 | 0.515 | 0.017203606 | OSTC       | 6 | MT2A_B |
| 2933 | 1.16E-06 | -0.971655405 | 0.17  | 0.502 | 0.025300815 | LMAN1      | 6 | MT2A_B |
| 2934 | 7.94E-07 | -1.000009443 | 0.106 | 0.46  | 0.017324547 | SDF2L1     | 6 | MT2A_B |
| 2935 | 2.04E-07 | -1.005568893 | 0.128 | 0.498 | 0.004446389 | KDELR2     | 6 | MT2A_B |
| 2936 | 1.31E-06 | -1.048132504 | 0.213 | 0.523 | 0.028666955 | ITM2C      | 6 | MT2A_B |
| 2937 | 8.14E-08 | -1.110688131 | 0.106 | 0.493 | 0.001775328 | SPCS3      | 6 | MT2A_B |
| 2938 | 5.62E-07 | -1.165575915 | 0.34  | 0.623 | 0.012245526 | HSPA5      | 6 | MT2A_B |
| 2939 | 5.03E-07 | -1.206271263 | 0.191 | 0.512 | 0.010980326 | SSR3       | 6 | MT2A_B |
| 2940 | 4.70E-07 | -1.615018911 | 0.191 | 0.511 | 0.010253139 | XBP1       | 6 | MT2A_B |
| 2941 | 4.54E-07 | -1.872995562 | 0.489 | 0.673 | 0.009908128 | HSP90B1    | 6 | MT2A_B |
| 2942 | 3.21E-10 | -3.660951514 | 0.255 | 0.642 | 7.00E-06    | JCHAIN     | 6 | MT2A_B |

**Table 19: List of DEGs of B/plasma cell clusters in reperfusion stage (PR versus EP)**List of differentially expressed genes of TCL1A<sup>B</sup> in reperfusion stage (PR versus EP)

| gene     | p_val    | avg_logFC    | pct.1 | pct.2 | p_val_adj   |
|----------|----------|--------------|-------|-------|-------------|
| HLA-DRB1 | 1.69E-22 | 0.744614242  | 0.993 | 0.909 | 3.69E-18    |
| RPS29    | 1.24E-19 | 0.477193332  | 0.98  | 0.963 | 2.70E-15    |
| EZR      | 9.19E-18 | 0.883420533  | 0.859 | 0.477 | 2.01E-13    |
| DEFA3    | 3.26E-16 | -1.317341296 | 0.02  | 0.391 | 7.11E-12    |
| HBB      | 8.59E-15 | -1.184467256 | 0.06  | 0.428 | 1.87E-10    |
| HSPD1    | 3.31E-14 | 1.437538703  | 0.597 | 0.288 | 7.21E-10    |
| CD52     | 7.88E-13 | -0.540645341 | 0.765 | 0.918 | 1.72E-08    |
| TMSB4X   | 9.13E-12 | -0.405825787 | 0.953 | 0.996 | 1.99E-07    |
| HSPH1    | 1.63E-11 | 1.210657831  | 0.463 | 0.169 | 3.56E-07    |
| FTH1     | 7.47E-11 | 0.601408743  | 0.987 | 0.984 | 1.63E-06    |
| IRF1     | 1.44E-10 | 0.836845924  | 0.523 | 0.239 | 3.15E-06    |
| HSPB1    | 3.40E-10 | 1.174585413  | 0.416 | 0.156 | 7.41E-06    |
| NCF1     | 4.24E-10 | -0.689886089 | 0.315 | 0.617 | 9.25E-06    |
| DUSP1    | 6.21E-10 | -0.460712268 | 0.906 | 0.934 | 1.35E-05    |
| CREM     | 1.16E-08 | 0.90679892   | 0.349 | 0.119 | 0.000252916 |
| RPS2     | 5.76E-08 | 0.289889048  | 0.98  | 0.963 | 0.001256644 |
| GADD45B  | 6.11E-08 | 0.547805398  | 0.826 | 0.584 | 0.001332831 |
| IGKV4-1  | 6.45E-08 | -0.702885271 | 0.128 | 0.391 | 0.001406742 |
| POLD4    | 1.17E-07 | -0.610918625 | 0.188 | 0.453 | 0.002557463 |
| HSP90AB1 | 1.58E-07 | 0.653883322  | 0.913 | 0.765 | 0.003436944 |
| FAM96A   | 2.06E-07 | -0.691994128 | 0.114 | 0.337 | 0.004485478 |
| IGLV2-14 | 2.93E-07 | -0.35775404  | 0.107 | 0.358 | 0.00637909  |
| IGHM     | 3.30E-07 | -0.58993278  | 0.369 | 0.605 | 0.007193809 |
| PELI1    | 3.32E-07 | 0.694590819  | 0.295 | 0.099 | 0.007236103 |
| FCMR     | 3.35E-07 | -0.517085654 | 0.49  | 0.691 | 0.007297734 |
| TNFAIP8  | 4.70E-07 | -0.567740629 | 0.295 | 0.514 | 0.010253585 |
| SNX9     | 4.83E-07 | 0.660104964  | 0.403 | 0.181 | 0.010522997 |
| IGKV2-30 | 6.51E-07 | -0.705280316 | 0.067 | 0.267 | 0.014192662 |
| IFITM1   | 9.28E-07 | 0.700974876  | 0.369 | 0.16  | 0.020235656 |
| ZC3H12A  | 1.04E-06 | 0.597831773  | 0.349 | 0.144 | 0.022757075 |
| HVCN1    | 1.40E-06 | -0.590860347 | 0.262 | 0.477 | 0.030507031 |
| TMEM123  | 1.91E-06 | 0.607656966  | 0.591 | 0.387 | 0.041547935 |
| RNASE6   | 2.07E-06 | -0.591719273 | 0.282 | 0.506 | 0.045189025 |

List of differentially expressed genes of IGKV1D-16 plasma in reperfusion stage (PR versus EP)

| gene      | p_val    | avg_logFC    | pct.1 | pct.2 | p_val_adj   |
|-----------|----------|--------------|-------|-------|-------------|
| EZR       | 2.31E-18 | 0.894453505  | 0.956 | 0.716 | 5.04E-14    |
| TYMP      | 4.23E-13 | 0.55543685   | 0.689 | 0.273 | 9.23E-09    |
| VIM       | 1.14E-12 | 0.760901904  | 0.933 | 0.903 | 2.49E-08    |
| DNAAF1    | 1.64E-12 | 1.091029916  | 0.456 | 0.091 | 3.58E-08    |
| IGKV1-17  | 2.24E-12 | 3.552342257  | 0.289 | 0.011 | 4.88E-08    |
| EIF1      | 3.45E-12 | 0.461241033  | 0.978 | 0.926 | 7.51E-08    |
| TPM4      | 6.51E-12 | 0.580554235  | 0.9   | 0.682 | 1.42E-07    |
| RPS29     | 6.89E-12 | 0.569386007  | 0.922 | 0.858 | 1.50E-07    |
| IGHV3-72  | 1.24E-11 | 1.065752085  | 0.311 | 0.023 | 2.71E-07    |
| SAT1      | 8.99E-11 | 0.833640151  | 0.978 | 0.881 | 1.96E-06    |
| HSPB1     | 1.47E-10 | 0.651749748  | 0.356 | 0.057 | 3.22E-06    |
| PDIA4     | 4.31E-10 | -0.527938442 | 0.9   | 0.955 | 9.39E-06    |
| MALAT1    | 5.91E-10 | 0.542628387  | 1     | 1     | 1.29E-05    |
| IGLV1-44  | 9.80E-10 | 1.021771034  | 0.278 | 0.028 | 2.14E-05    |
| CHST2     | 1.57E-09 | 0.363326833  | 0.633 | 0.244 | 3.43E-05    |
| MT-ATP6   | 3.32E-09 | -0.616311639 | 1     | 1     | 7.24E-05    |
| SPCS2     | 3.95E-09 | -0.36397345  | 0.922 | 0.949 | 8.62E-05    |
| HIST1H2BN | 6.41E-09 | -0.385041272 | 0.033 | 0.369 | 0.000139737 |
| SLC7A5    | 1.00E-08 | 0.502688651  | 0.8   | 0.466 | 0.000218552 |
| IGHV1-18  | 1.04E-08 | 0.629723709  | 0.233 | 0.017 | 0.000226084 |
| HSP90AA1  | 1.45E-08 | 0.757754762  | 0.933 | 0.824 | 0.000316228 |
| PSMB8     | 2.27E-08 | -0.412529377 | 0.422 | 0.716 | 0.000496128 |
| DEFA3     | 2.81E-08 | 0.325578255  | 0.078 | 0.42  | 0.000612222 |
| IGHV3-30  | 4.98E-08 | 0.501741817  | 0.456 | 0.125 | 0.001085132 |
| ZFP36     | 5.38E-08 | 0.517847435  | 0.956 | 0.892 | 0.001173022 |
| IGHV3-48  | 5.78E-08 | 1.064220758  | 0.289 | 0.045 | 0.001260804 |
| JUN       | 6.69E-08 | -0.97789997  | 0.633 | 0.835 | 0.001459396 |

|             |          |              |       |       |             |
|-------------|----------|--------------|-------|-------|-------------|
| FAM49A      | 9.04E-08 | 0.294967126  | 0.578 | 0.261 | 0.001971712 |
| YWHAH       | 2.16E-07 | 0.366489462  | 0.544 | 0.25  | 0.004700104 |
| PELI1       | 2.46E-07 | 0.443671132  | 0.689 | 0.409 | 0.005362781 |
| IGKV1-9     | 2.88E-07 | 2.562857523  | 0.233 | 0.034 | 0.006271763 |
| MT-CO3      | 3.03E-07 | -0.425817768 | 1     | 1     | 0.006608162 |
| IGLV2-8     | 3.50E-07 | 1.833160499  | 0.378 | 0.108 | 0.007640772 |
| IGHV3-21    | 4.75E-07 | 0.64646531   | 0.244 | 0.04  | 0.010367655 |
| IGHV3-11    | 4.83E-07 | 3.926195176  | 0.244 | 0.04  | 0.010537522 |
| IGKV3-11    | 5.70E-07 | 0.779063639  | 0.389 | 0.125 | 0.01243697  |
| ZBTB32      | 6.09E-07 | 0.362080942  | 0.422 | 0.159 | 0.013281535 |
| MIR4435-2HG | 7.19E-07 | 0.527270486  | 0.667 | 0.438 | 0.015671281 |
| PIM3        | 9.23E-07 | 0.375674177  | 0.589 | 0.341 | 0.020137205 |
| RPN1        | 1.08E-06 | -0.354951984 | 0.833 | 0.92  | 0.023577566 |
| LINC01480   | 1.11E-06 | 0.561602245  | 0.611 | 0.341 | 0.024309764 |
| CALR        | 1.16E-06 | -0.455492422 | 0.944 | 0.932 | 0.025241228 |
| IGKV3D-20   | 1.22E-06 | 4.764920456  | 0.289 | 0.074 | 0.026532796 |
| EIF5        | 1.31E-06 | 0.451474677  | 0.867 | 0.625 | 0.028533917 |
| SAR1B       | 1.72E-06 | -0.364105632 | 0.544 | 0.773 | 0.037545909 |
| FAM69A      | 1.93E-06 | -0.269786718 | 0.111 | 0.381 | 0.041987322 |
| BST2        | 2.11E-06 | -0.416545858 | 0.389 | 0.625 | 0.045912288 |

List of differentially expressed genes of GPR183 B in reperfusion stage (PR versus EP)

| gene       | p val    | avg logFC    | pct.1 | pct.2 | p val adj   |
|------------|----------|--------------|-------|-------|-------------|
| EZR        | 3.53E-17 | 0.981303692  | 0.943 | 0.683 | 7.70E-13    |
| CD52       | 1.25E-16 | -0.708733064 | 0.764 | 0.976 | 2.73E-12    |
| RPS29      | 9.16E-15 | 0.451423781  | 0.984 | 0.984 | 2.00E-10    |
| HBB        | 5.50E-14 | -1.042700008 | 0.033 | 0.431 | 1.20E-09    |
| HLA-DRB1   | 1.07E-13 | 0.636032379  | 0.984 | 0.967 | 2.33E-09    |
| HSPD1      | 1.10E-13 | 1.564488757  | 0.74  | 0.415 | 2.40E-09    |
| DEFA3      | 8.69E-12 | -1.011090756 | 0.024 | 0.374 | 1.89E-07    |
| HSPB1      | 2.49E-11 | 1.656011428  | 0.675 | 0.301 | 5.44E-07    |
| EIF1       | 9.43E-10 | 0.408901316  | 1     | 0.992 | 2.06E-05    |
| PIM3       | 4.21E-09 | 0.828393449  | 0.415 | 0.098 | 9.18E-05    |
| HSP90AA1   | 4.27E-09 | 1.149603516  | 0.894 | 0.846 | 9.31E-05    |
| HSP90AB1   | 5.97E-09 | 0.588339669  | 0.959 | 0.846 | 0.000130092 |
| HSPH1      | 1.22E-08 | 1.092432173  | 0.602 | 0.301 | 0.000266162 |
| SRGN       | 1.46E-08 | 0.76904541   | 0.789 | 0.577 | 0.000318901 |
| CREM       | 2.42E-08 | 0.993261999  | 0.512 | 0.187 | 0.000528333 |
| FCMR       | 4.19E-08 | -0.554871295 | 0.358 | 0.748 | 0.000914314 |
| YWHAH      | 1.46E-07 | 0.638445169  | 0.423 | 0.13  | 0.003177082 |
| PTMA       | 1.75E-07 | 0.319571753  | 1     | 0.992 | 0.003825404 |
| AC006129.2 | 3.67E-07 | -0.644790223 | 0.073 | 0.333 | 0.008003677 |
| IRF1       | 4.60E-07 | 0.714053982  | 0.52  | 0.236 | 0.010038415 |
| CD79B      | 4.78E-07 | -0.554268705 | 0.317 | 0.61  | 0.010429248 |
| METTL7A    | 6.40E-07 | -0.560605015 | 0.024 | 0.236 | 0.013964794 |
| NCF1       | 6.46E-07 | -0.549065659 | 0.293 | 0.61  | 0.014081769 |
| LRRFIP1    | 8.17E-07 | 0.803430111  | 0.659 | 0.48  | 0.017810221 |
| KLF10      | 8.21E-07 | 0.757095019  | 0.423 | 0.154 | 0.017911542 |
| CD37       | 8.23E-07 | -0.310596662 | 0.919 | 1     | 0.017937145 |
| TMSB4X     | 1.12E-06 | -0.331347773 | 0.976 | 1     | 0.024367418 |
| ZFP36      | 1.16E-06 | 0.470283247  | 0.976 | 0.919 | 0.025222046 |
| TMSB10     | 1.20E-06 | -0.417932923 | 0.967 | 0.992 | 0.026196283 |
| NUDC       | 1.20E-06 | 0.652971897  | 0.455 | 0.195 | 0.026238314 |
| RNASE6     | 1.27E-06 | -0.688913629 | 0.179 | 0.455 | 0.027753799 |
| TXNIP      | 1.50E-06 | -0.442354791 | 0.659 | 0.894 | 0.032802561 |

List of differentially expressed genes of HIST1H4C plasma in reperfusion stage (PR versus EP)

| gene  | p val    | avg logFC    | pct.1 | pct.2 | p val adj   |
|-------|----------|--------------|-------|-------|-------------|
| SMC4  | 1.96E-08 | -1.083428432 | 0.071 | 0.938 | 0.000427668 |
| TMCO1 | 6.76E-08 | -0.691651724 | 0.071 | 0.927 | 0.001474304 |
| PREB  | 7.10E-08 | -0.874947523 | 0.143 | 0.938 | 0.001549154 |
| MT1G  | 1.18E-07 | 1.125531564  | 0.286 | 0     | 0.002583345 |
| CD48  | 2.93E-07 | -0.776327859 | 0.071 | 0.865 | 0.006381248 |

|           |          |              |       |       |             |
|-----------|----------|--------------|-------|-------|-------------|
| EIF4G2    | 4.69E-07 | -0.850663102 | 0.357 | 0.979 | 0.010236239 |
| UAP1      | 4.81E-07 | -0.866269685 | 0.214 | 0.885 | 0.010495265 |
| TNFRSF17  | 5.02E-07 | -1.17089351  | 0.357 | 0.969 | 0.010938138 |
| CPNE5     | 5.42E-07 | -0.631979484 | 0.071 | 0.865 | 0.01182234  |
| H2AFV     | 6.57E-07 | -0.812014123 | 0.571 | 0.99  | 0.014318852 |
| TYMS      | 6.83E-07 | -0.987795847 | 0.143 | 0.896 | 0.014897426 |
| POLR2E    | 7.05E-07 | -0.652442546 | 0.071 | 0.896 | 0.015377085 |
| STMN1     | 7.54E-07 | -1.043484265 | 0.5   | 1     | 0.016447416 |
| HNRNPA2B1 | 1.04E-06 | -0.80645167  | 0.714 | 1     | 0.022720358 |
| RRM2      | 1.06E-06 | -1.322436268 | 0.214 | 0.927 | 0.023055982 |
| MRPL27    | 1.43E-06 | -0.624920618 | 0.071 | 0.833 | 0.03128374  |
| RAC1      | 1.66E-06 | -0.735377044 | 0.214 | 0.958 | 0.036217394 |
| CALR      | 1.87E-06 | -0.949091794 | 0.786 | 1     | 0.040797438 |
| PPP1CA    | 2.13E-06 | -0.842162784 | 0.357 | 0.948 | 0.046529994 |
| SPCS2     | 2.23E-06 | -0.75550275  | 0.714 | 1     | 0.048699656 |

List of differentially expressed genes of IGLV3-1 plasma in reperfusion stage (PR versus EP)

| gene | p val | avg logFC | pct.1 | pct.2 | p val adj |
|------|-------|-----------|-------|-------|-----------|
| NA   |       |           |       |       |           |

List of differentially expressed genes of MT2A B in reperfusion stage (PR versus EP)

| gene | p val | avg logFC | pct.1 | pct.2 | p val adj |
|------|-------|-----------|-------|-------|-----------|
| NA   |       |           |       |       |           |

**Table 20: List of DEGs of B/plasma cell clusters in overall stage (PR versus PP)**List of differentially expressed genes of TCL1A<sub>B</sub> in overall stage (PR versus PP)

| gene     | p_val    | avg logFC    | pct.1 | pct.2 | p_val adj   |
|----------|----------|--------------|-------|-------|-------------|
| DEFA3    | 2.55E-23 | -1.396640005 | 0.02  | 0.532 | 5.56E-19    |
| RPS29    | 4.25E-17 | 0.431807446  | 0.98  | 0.98  | 9.26E-13    |
| HBB      | 1.41E-16 | -1.244928267 | 0.06  | 0.478 | 3.07E-12    |
| GADD45B  | 2.26E-16 | 1.031445797  | 0.826 | 0.557 | 4.92E-12    |
| HLA-DRB1 | 3.36E-16 | 0.611811516  | 0.993 | 0.94  | 7.32E-12    |
| TMSB4X   | 3.12E-15 | -0.478509329 | 0.953 | 1     | 6.80E-11    |
| CD52     | 9.07E-15 | -0.612106694 | 0.765 | 0.96  | 1.98E-10    |
| EZR      | 1.40E-14 | 0.826528643  | 0.859 | 0.567 | 3.05E-10    |
| HSP90AA1 | 2.91E-14 | 1.386344513  | 0.839 | 0.662 | 6.34E-10    |
| IRF1     | 7.95E-13 | 1.017047393  | 0.523 | 0.209 | 1.73E-08    |
| HSP90AB1 | 1.03E-12 | 0.859360976  | 0.913 | 0.736 | 2.26E-08    |
| HSPD1    | 2.34E-12 | 1.412823656  | 0.597 | 0.318 | 5.10E-08    |
| FTH1     | 6.97E-12 | 0.626937347  | 0.987 | 0.985 | 1.52E-07    |
| TCL1A    | 2.10E-11 | -0.771042031 | 0.376 | 0.726 | 4.59E-07    |
| HSPH1    | 2.26E-11 | 1.366064472  | 0.463 | 0.169 | 4.93E-07    |
| CD37     | 2.70E-10 | -0.325343613 | 0.953 | 1     | 5.89E-06    |
| RNASE6   | 4.69E-10 | -0.699004245 | 0.282 | 0.617 | 1.02E-05    |
| ZNF331   | 6.47E-10 | 0.875698523  | 0.51  | 0.209 | 1.41E-05    |
| HVCN1    | 1.10E-09 | -0.659334317 | 0.262 | 0.592 | 2.40E-05    |
| RPS19    | 2.11E-09 | -0.258397444 | 1     | 1     | 4.60E-05    |
| MT-ND3   | 4.17E-09 | 0.405106245  | 1     | 0.995 | 9.09E-05    |
| FCMR     | 1.23E-08 | -0.579154687 | 0.49  | 0.741 | 0.00267781  |
| TNFAIP8  | 4.31E-08 | -0.608547369 | 0.295 | 0.557 | 0.000939548 |
| NFKBIA   | 8.39E-08 | 0.651343256  | 0.785 | 0.672 | 0.001829553 |
| SNX9     | 9.81E-08 | 0.736005737  | 0.403 | 0.164 | 0.002139173 |
| POLD4    | 1.34E-07 | -0.5788944   | 0.188 | 0.473 | 0.002918239 |
| SAT1     | 1.39E-07 | 0.6775107    | 0.725 | 0.517 | 0.003036815 |
| MT2A     | 2.37E-07 | 2.920102573  | 0.228 | 0.045 | 0.005167088 |
| REL      | 3.15E-07 | 0.710776719  | 0.664 | 0.483 | 0.006860835 |
| TMSB10   | 6.12E-07 | -0.27010603  | 0.973 | 1     | 0.01334352  |
| TCP1     | 6.39E-07 | 0.685481159  | 0.309 | 0.104 | 0.013933483 |
| NCF1     | 8.74E-07 | -0.524608384 | 0.315 | 0.597 | 0.019052751 |
| FAM96A   | 1.22E-06 | -0.542573815 | 0.114 | 0.343 | 0.026679377 |

List of differentially expressed genes of IGKV1D-16<sub>plasma</sub> in overall stage (PR versus PP)

| gene     | p_val    | avg logFC    | pct.1 | pct.2 | p_val adj   |
|----------|----------|--------------|-------|-------|-------------|
| DNAAF1   | 1.82E-16 | 1.169179665  | 0.456 | 0.065 | 3.96E-12    |
| MALAT1   | 4.45E-15 | 0.662227178  | 1     | 1     | 9.70E-11    |
| HSP90AA1 | 6.91E-14 | 1.021153317  | 0.933 | 0.808 | 1.51E-09    |
| EZR      | 1.22E-13 | 0.72055693   | 0.956 | 0.818 | 2.66E-09    |
| TPM4     | 1.51E-13 | 0.622662579  | 0.9   | 0.678 | 3.30E-09    |
| SPCS2    | 1.22E-12 | -0.440041126 | 0.922 | 0.963 | 2.66E-08    |
| HSPB1    | 2.65E-12 | 0.651127115  | 0.356 | 0.051 | 5.79E-08    |
| RPS29    | 7.06E-12 | 0.504307661  | 0.922 | 0.869 | 1.54E-07    |
| EAF2     | 2.08E-11 | -0.365351431 | 0.3   | 0.687 | 4.53E-07    |
| MT2A     | 2.44E-11 | 2.736085184  | 0.378 | 0.07  | 5.33E-07    |
| SLC7A5   | 2.68E-11 | 0.673436723  | 0.8   | 0.533 | 5.85E-07    |
| VIM      | 3.65E-11 | 0.699034332  | 0.933 | 0.921 | 7.97E-07    |
| EHMT1    | 5.62E-11 | 0.63060262   | 0.7   | 0.369 | 1.23E-06    |
| PDIA4    | 5.66E-11 | -0.4948748   | 0.9   | 0.958 | 1.23E-06    |
| TYMP     | 6.43E-11 | 0.518303615  | 0.689 | 0.388 | 1.40E-06    |
| PSMB8    | 9.68E-11 | -0.495572382 | 0.422 | 0.757 | 2.11E-06    |
| CALR     | 1.34E-10 | -0.511761998 | 0.944 | 0.972 | 2.92E-06    |
| IGHV3-30 | 2.07E-10 | 0.675198868  | 0.456 | 0.112 | 4.51E-06    |
| FAM49A   | 6.14E-10 | 0.332148762  | 0.578 | 0.252 | 1.34E-05    |
| NDUFB3   | 2.79E-09 | -0.418820105 | 0.433 | 0.762 | 6.09E-05    |
| SAR1B    | 5.54E-09 | -0.40715594  | 0.544 | 0.836 | 0.000120911 |
| IGKV1-9  | 6.51E-09 | 2.878618613  | 0.233 | 0.028 | 0.000141904 |
| IGKV1-17 | 7.68E-09 | 3.510662815  | 0.289 | 0.056 | 0.000167562 |
| HBB      | 8.66E-09 | -0.519874973 | 0.133 | 0.495 | 0.000188919 |
| RELB     | 9.06E-09 | 0.313828563  | 0.578 | 0.271 | 0.000197572 |
| SAT1     | 1.15E-08 | 0.640205368  | 0.978 | 0.907 | 0.000250145 |
| COPB2    | 1.78E-08 | -0.383392289 | 0.422 | 0.724 | 0.0003881   |

|              |          |              |       |       |             |
|--------------|----------|--------------|-------|-------|-------------|
| PIIB         | 2.74E-08 | -0.384803443 | 0.989 | 0.986 | 0.000598571 |
| TNFRSF17     | 2.83E-08 | -0.559257877 | 0.7   | 0.86  | 0.000616887 |
| NEAT1        | 7.63E-08 | 0.27853941   | 0.967 | 0.953 | 0.001663885 |
| IGLV2-23     | 7.84E-08 | 0.791557322  | 0.378 | 0.112 | 0.001709261 |
| RP11-16E12.2 | 9.98E-08 | -0.362405969 | 0.289 | 0.626 | 0.002176998 |
| MDH1         | 1.00E-07 | -0.324589404 | 0.244 | 0.551 | 0.002187418 |
| AKAP2        | 1.11E-07 | -0.282632456 | 0.133 | 0.444 | 0.002415864 |
| PSMB9        | 1.18E-07 | -0.368044008 | 0.444 | 0.738 | 0.002571383 |
| YWHAH        | 1.72E-07 | 0.391762187  | 0.544 | 0.308 | 0.003759647 |
| IGHV3-21     | 1.80E-07 | 3.250999658  | 0.244 | 0.042 | 0.003929853 |
| ATP5J        | 2.73E-07 | -0.315672603 | 0.789 | 0.841 | 0.005955853 |
| SSR1         | 3.40E-07 | -0.410390655 | 0.744 | 0.888 | 0.00741683  |
| LMAN2        | 4.02E-07 | -0.334911086 | 0.822 | 0.939 | 0.008756779 |
| AREG         | 4.16E-07 | 0.404307321  | 0.267 | 0.065 | 0.009081932 |
| SEC14L1      | 4.19E-07 | -0.361274106 | 0.6   | 0.808 | 0.009136576 |
| PSMA3        | 4.38E-07 | -0.296831927 | 0.389 | 0.696 | 0.009554031 |
| HMGB1        | 4.92E-07 | -0.540461855 | 0.811 | 0.911 | 0.010726092 |
| DCPS         | 5.27E-07 | -0.325310507 | 0.289 | 0.593 | 0.011499709 |
| UBE2J1       | 6.10E-07 | -0.403373692 | 0.9   | 0.93  | 0.013309453 |
| MIR4435-2HG  | 6.93E-07 | 0.524883023  | 0.667 | 0.491 | 0.015112444 |
| SMARCB1      | 7.26E-07 | -0.281534268 | 0.333 | 0.654 | 0.015840281 |
| IGLV7-43     | 7.53E-07 | 3.912447638  | 0.111 | 0     | 0.016427911 |
| CHST2        | 8.08E-07 | 0.269963533  | 0.633 | 0.369 | 0.017620586 |
| VDAC3        | 1.04E-06 | -0.260169402 | 0.2   | 0.519 | 0.022577124 |
| BST2         | 1.59E-06 | -0.359680338 | 0.389 | 0.668 | 0.03475817  |
| IGHV3-11     | 1.67E-06 | 3.939931439  | 0.244 | 0.056 | 0.036509713 |
| CREM         | 1.76E-06 | 0.281933049  | 0.389 | 0.159 | 0.038489127 |
| PSMA5        | 1.99E-06 | -0.307138998 | 0.467 | 0.734 | 0.043317487 |
| ATPIF1       | 2.08E-06 | -0.367012885 | 0.511 | 0.734 | 0.045455296 |

List of differentially expressed genes of GPR183\_B in overall stage (PR versus PP)

| gene     | p val    | avg logFC    | pct.1 | pct.2 | p val adj   |
|----------|----------|--------------|-------|-------|-------------|
| DEFA3    | 1.97E-18 | -1.221424172 | 0.024 | 0.558 | 4.29E-14    |
| HBB      | 7.35E-18 | -1.368766083 | 0.033 | 0.537 | 1.60E-13    |
| RPS29    | 4.04E-17 | 0.564090706  | 0.984 | 1     | 8.80E-13    |
| CD52     | 4.12E-12 | -0.666089992 | 0.764 | 0.979 | 8.98E-08    |
| HSPD1    | 7.88E-12 | 1.564709623  | 0.74  | 0.432 | 1.72E-07    |
| HSP90AA1 | 1.98E-11 | 1.421947849  | 0.894 | 0.758 | 4.32E-07    |
| EZR      | 1.19E-10 | 0.766933236  | 0.943 | 0.747 | 2.59E-06    |
| HSPB1    | 2.68E-10 | 1.635780701  | 0.675 | 0.305 | 5.85E-06    |
| TMSB4X   | 2.95E-10 | -0.417065343 | 0.976 | 1     | 6.43E-06    |
| HSPH1    | 2.89E-09 | 1.253519792  | 0.602 | 0.263 | 6.31E-05    |
| LRRFIP1  | 2.67E-08 | 0.990151726  | 0.659 | 0.411 | 0.000581966 |
| HSPA1A   | 3.66E-08 | 1.579430451  | 0.618 | 0.274 | 0.000798175 |
| POLD4    | 4.14E-08 | -0.76150346  | 0.252 | 0.579 | 0.000903709 |
| PTPN6    | 8.80E-08 | -0.557080425 | 0.333 | 0.716 | 0.001918839 |
| IRF1     | 8.82E-08 | 0.861092718  | 0.52  | 0.179 | 0.001922679 |
| CD24     | 1.39E-07 | -0.751332498 | 0.285 | 0.589 | 0.003027671 |
| GADD45B  | 1.49E-07 | 0.780652529  | 0.756 | 0.453 | 0.003258048 |
| HSPE1    | 1.64E-07 | 1.280226969  | 0.659 | 0.421 | 0.003578111 |
| TMSB10   | 1.76E-07 | -0.45068214  | 0.967 | 1     | 0.003836033 |
| HLA-DRB1 | 3.36E-07 | 0.470093017  | 0.984 | 0.958 | 0.007332278 |
| HSP90AB1 | 4.63E-07 | 0.54363969   | 0.959 | 0.895 | 0.010100312 |
| NCF1     | 4.75E-07 | -0.654224898 | 0.293 | 0.642 | 0.010359038 |
| TXNIP    | 8.56E-07 | -0.469103035 | 0.659 | 0.968 | 0.018665676 |
| NUDC     | 1.11E-06 | 0.707009041  | 0.455 | 0.147 | 0.024229985 |
| NEAT1    | 1.30E-06 | 0.73028563   | 0.748 | 0.516 | 0.028245001 |
| FCGR2B   | 1.63E-06 | -0.634884241 | 0.171 | 0.484 | 0.035634884 |
| SAT1     | 1.99E-06 | 0.713499832  | 0.87  | 0.747 | 0.043290176 |

List of differentially expressed genes of HIST1H4C\_plasma in overall stage (PR versus PP)

| gene | p val    | avg logFC    | pct.1 | pct.2 | p val adj  |
|------|----------|--------------|-------|-------|------------|
| SMC4 | 7.94E-09 | -1.118661875 | 0.071 | 0.94  | 0.00017312 |

|           |          |              |       |       |             |
|-----------|----------|--------------|-------|-------|-------------|
| MT1G      | 8.43E-09 | 1.118679354  | 0.286 | 0.007 | 0.000183825 |
| PREB      | 2.64E-08 | -0.866924694 | 0.143 | 0.946 | 0.000576702 |
| HNRNPA2B1 | 3.95E-08 | -0.969171444 | 0.714 | 1     | 0.000860606 |
| PSMD11    | 4.32E-08 | -0.656648191 | 0.143 | 0.926 | 0.000942367 |
| PPP1CA    | 4.64E-08 | -0.970999204 | 0.357 | 0.987 | 0.00101281  |
| STMN1     | 4.82E-08 | -1.208135099 | 0.5   | 1     | 0.001050844 |
| UAP1      | 5.16E-08 | -1.002419793 | 0.214 | 0.933 | 0.001125273 |
| CD48      | 5.59E-08 | -0.78051479  | 0.071 | 0.893 | 0.001218622 |
| TNFRSF17  | 7.15E-08 | -1.159190103 | 0.357 | 0.987 | 0.001558764 |
| MRPL27    | 9.02E-08 | -0.632297117 | 0.071 | 0.906 | 0.001967077 |
| TYMS      | 9.09E-08 | -1.199757967 | 0.143 | 0.906 | 0.001981302 |
| H2AFV     | 9.32E-08 | -0.905970941 | 0.571 | 0.993 | 0.002033468 |
| TMCO1     | 9.40E-08 | -0.654286173 | 0.071 | 0.899 | 0.002050184 |
| RAC1      | 1.23E-07 | -0.862775372 | 0.214 | 0.96  | 0.002683555 |
| SAA1      | 1.28E-07 | 0.617421598  | 0.357 | 0.027 | 0.002787673 |
| BCL2L12   | 1.51E-07 | -0.579899881 | 0     | 0.846 | 0.003289261 |
| POLR2E    | 1.69E-07 | -0.803801734 | 0.071 | 0.899 | 0.003675567 |
| NUDT5     | 1.74E-07 | -0.7235822   | 0.143 | 0.906 | 0.00378892  |
| RRM2      | 1.75E-07 | -1.65361618  | 0.214 | 0.926 | 0.003814149 |
| PSMD4     | 1.75E-07 | -0.579221309 | 0.071 | 0.893 | 0.003825993 |
| TK1       | 1.85E-07 | -0.762373407 | 0.071 | 0.872 | 0.004033548 |
| PGK1      | 2.22E-07 | -0.946004005 | 0.429 | 0.987 | 0.004841596 |
| NDUFC1    | 2.66E-07 | -0.812855193 | 0.286 | 0.96  | 0.00579714  |
| TIMM10    | 2.83E-07 | -0.549587026 | 0.071 | 0.859 | 0.006168378 |
| ACADM     | 3.17E-07 | -0.602620704 | 0.071 | 0.872 | 0.006922733 |
| ZWINT     | 3.48E-07 | -0.631742546 | 0     | 0.819 | 0.007580672 |
| CALR      | 3.74E-07 | -0.977959084 | 0.786 | 0.993 | 0.008161369 |
| PSMB2     | 3.79E-07 | -0.774662667 | 0.429 | 0.987 | 0.008265828 |
| BOLA3     | 4.21E-07 | -0.600547001 | 0.071 | 0.872 | 0.009177678 |
| UBE2T     | 4.26E-07 | -0.576050267 | 0     | 0.812 | 0.009293467 |
| EIF4G2    | 4.34E-07 | -0.838509616 | 0.357 | 0.966 | 0.00945699  |
| DHFR      | 4.45E-07 | -0.835408637 | 0.071 | 0.832 | 0.009711128 |
| SNRNP40   | 5.37E-07 | -0.559387663 | 0.071 | 0.832 | 0.011702646 |
| MRPL14    | 5.53E-07 | -0.644290505 | 0.214 | 0.893 | 0.012051563 |
| NDUFA9    | 5.80E-07 | -0.531597539 | 0.071 | 0.859 | 0.012653323 |
| HNRNPAB   | 5.98E-07 | -0.819084715 | 0.286 | 0.966 | 0.013050939 |
| TMPO      | 6.20E-07 | -0.675101416 | 0.214 | 0.919 | 0.013517292 |
| COPS3     | 7.02E-07 | -0.62273729  | 0.143 | 0.893 | 0.015302402 |
| POLR2J    | 7.24E-07 | -0.635040268 | 0.071 | 0.886 | 0.015782569 |
| ATP5G3    | 7.26E-07 | -0.833009073 | 0.714 | 1     | 0.015832347 |
| MRPS33    | 7.29E-07 | -0.573233289 | 0.143 | 0.872 | 0.015893709 |
| CFL1      | 7.71E-07 | -0.990256174 | 0.571 | 1     | 0.01681817  |
| RBM3      | 8.19E-07 | -0.881615212 | 0.571 | 1     | 0.017870837 |
| PSMD8     | 8.28E-07 | -0.805620839 | 0.357 | 0.98  | 0.018064358 |
| COPS8     | 8.51E-07 | -0.45353841  | 0.071 | 0.832 | 0.018555037 |
| SHMT2     | 8.83E-07 | -0.776767848 | 0.143 | 0.96  | 0.019254424 |
| APH1A     | 9.30E-07 | -0.567653349 | 0.214 | 0.913 | 0.020291414 |
| SDHB      | 9.64E-07 | -0.59427377  | 0.071 | 0.872 | 0.021032002 |
| PPIA      | 1.14E-06 | -0.797020627 | 0.929 | 1     | 0.024909513 |
| TIMM50    | 1.15E-06 | -0.445324396 | 0     | 0.779 | 0.024982651 |
| SRP9      | 1.16E-06 | -0.5347155   | 0.286 | 0.953 | 0.025311866 |
| CCT8      | 1.17E-06 | -0.750536798 | 0.5   | 0.987 | 0.025614004 |
| ATP5G1    | 1.17E-06 | -0.935116991 | 0.357 | 1     | 0.025614004 |
| SAR1B     | 1.23E-06 | -0.372095427 | 0.357 | 0.993 | 0.026767766 |
| UFD1L     | 1.26E-06 | -0.563703397 | 0.143 | 0.946 | 0.027447415 |
| OST4      | 1.33E-06 | -0.721212295 | 0.643 | 1     | 0.028911074 |
| ATPIF1    | 1.36E-06 | -0.787522736 | 0.357 | 0.987 | 0.029684484 |
| CDK1      | 1.39E-06 | -0.671021483 | 0     | 0.772 | 0.030268773 |
| COX7A2L   | 1.52E-06 | -0.664669795 | 0.357 | 0.96  | 0.033238158 |
| HSPA6     | 1.54E-06 | 1.291989472  | 0.214 | 0.007 | 0.033514236 |
| POLR2K    | 1.58E-06 | -0.5858739   | 0.214 | 0.899 | 0.03441014  |
| RAB5C     | 1.65E-06 | -0.461545468 | 0.071 | 0.872 | 0.036055498 |
| PSMD2     | 1.73E-06 | -0.655298265 | 0.071 | 0.886 | 0.037737167 |
| SF3A3     | 1.76E-06 | -0.510782718 | 0.071 | 0.799 | 0.038387785 |
| UBL7      | 1.87E-06 | -0.461157758 | 0.071 | 0.799 | 0.040736577 |
| THOC3     | 1.89E-06 | -0.527240757 | 0.143 | 0.846 | 0.041255208 |
| HADH      | 1.92E-06 | -0.523261036 | 0.071 | 0.792 | 0.041922479 |
| C1QBP     | 2.00E-06 | -0.857079623 | 0.5   | 0.973 | 0.043577028 |
| SLIRP     | 2.05E-06 | -0.682704405 | 0.286 | 0.906 | 0.044668348 |
| VAPA      | 2.06E-06 | -0.643405072 | 0.214 | 0.899 | 0.044868272 |

|         |          |              |       |       |             |
|---------|----------|--------------|-------|-------|-------------|
| MORF4L2 | 2.06E-06 | -0.598906758 | 0.214 | 0.919 | 0.044869128 |
| AP2M1   | 2.17E-06 | -0.613694662 | 0.214 | 0.94  | 0.047415411 |
| FAM96B  | 2.23E-06 | -0.656377607 | 0.429 | 0.946 | 0.048622098 |

List of differentially expressed genes of IGLV3-1 plasma in overall stage (PR versus PP)

| gene     | p val    | avg logFC   | pct.1 | pct.2 | p val adj   |
|----------|----------|-------------|-------|-------|-------------|
| HSP90AA1 | 9.80E-09 | 2.381811041 | 1     | 0.909 | 0.000213612 |
| HSPB1    | 7.42E-08 | 2.416749035 | 1     | 0.5   | 0.001619118 |
| MIR155HG | 2.22E-06 | 1.410327444 | 0.793 | 0.182 | 0.048513589 |

List of differentially expressed genes of MT2A B in overall stage (PR versus PP)

| gene | p val | avg logFC | pct.1 | pct.2 | p val adj |
|------|-------|-----------|-------|-------|-----------|
| NA   |       |           |       |       |           |



**Table 21: List of DEGs of B/plasma cell clusters in cold preservation stage (EP versus PP)**

List of differentially expressed genes of TCL1A B in cold preservation stage (EP versus PP)

| gene     | p val    | avg logFC   | pct.1 | pct.2 | p val adj   |
|----------|----------|-------------|-------|-------|-------------|
| FOS      | 6.89E-10 | 0.625809403 | 0.909 | 0.771 | 1.50E-05    |
| IGLV2-14 | 1.01E-09 | 0.492652885 | 0.358 | 0.109 | 2.20E-05    |
| FOSB     | 1.15E-08 | 0.701482895 | 0.576 | 0.363 | 0.000250557 |
| DUSP1    | 6.22E-07 | 0.332743337 | 0.934 | 0.9   | 0.01357407  |

List of differentially expressed genes of IGKV1D-16 plasma in cold preservation stage (EP versus PP)

| gene     | p val    | avg logFC   | pct.1 | pct.2 | p val adj   |
|----------|----------|-------------|-------|-------|-------------|
| IGLV2-23 | 1.72E-08 | 1.128521546 | 0.347 | 0.112 | 0.00037444  |
| PPP1R15A | 2.25E-06 | -0.34259683 | 0.665 | 0.818 | 0.048997878 |

List of differentially expressed genes of GPR183 B in cold preservation stage (EP versus PP)

| gene | p val    | avg logFC  | pct.1 | pct.2 | p val adj   |
|------|----------|------------|-------|-------|-------------|
| FOS  | 8.96E-07 | 0.70874471 | 0.87  | 0.611 | 0.019543812 |

List of differentially expressed genes of HIST1H4C plasma in cold preservation stage (EP versus PP)

| gene    | p val    | avg logFC    | pct.1 | pct.2 | p val adj   |
|---------|----------|--------------|-------|-------|-------------|
| PFN1    | 4.56E-09 | -0.375343135 | 1     | 1     | 9.95E-05    |
| YBX1    | 3.52E-08 | -0.324359341 | 0.99  | 1     | 0.000768019 |
| PPIA    | 5.93E-08 | -0.282625043 | 1     | 1     | 0.001292756 |
| RPL9    | 9.90E-08 | -0.251662311 | 1     | 0.993 | 0.002158052 |
| RPS2    | 3.06E-07 | -0.325932951 | 1     | 1     | 0.006664824 |
| NME2    | 4.05E-07 | -0.270956904 | 1     | 1     | 0.008841276 |
| SLC25A5 | 7.28E-07 | -0.297217841 | 1     | 0.993 | 0.015875543 |
| CORO1A  | 1.04E-06 | -0.389784373 | 0.958 | 0.98  | 0.022712883 |
| RPL7    | 1.12E-06 | -0.252704043 | 1     | 1     | 0.024485358 |
| C1QBP   | 1.94E-06 | -0.309047258 | 0.906 | 0.973 | 0.042369624 |
| GPI     | 2.08E-06 | -0.266286668 | 0.812 | 0.919 | 0.045306505 |

List of differentially expressed genes of IGLV3-1 plasma in cold preservation stage (EP versus PP)

| gene | p val | avg logFC | pct.1 | pct.2 | p val adj |
|------|-------|-----------|-------|-------|-----------|
| NA   |       |           |       |       |           |

List of differentially expressed genes of MT2A B in cold preservation stage (EP versus PP)

| gene | p val | avg logFC | pct.1 | pct.2 | p val adj |
|------|-------|-----------|-------|-------|-----------|
| NA   |       |           |       |       |           |
